# Supplementary material for: Coordination of zygotic genome activation entry and exit by H3K4me3 and H3K27me3 in porcine early embryos
Source: HighWire-hosted journal article supplement (doi:10.1101/gr.276207.121), 2022-07-22
Supplement: Supplemental_Table_S1.xlsx [file Supplemental_Table_S1.xlsx]

## Sheet: Supplemental_Table_S1
Supplemental Table S1. Quality assessment of ULI-NChIP-seq dataset
Library name	Mapping rate	PCR duplication rate	PE fragment counts
H3K27me3_2cell_rep1	0.6515	0.595792	10027478
H3K27me3_2cell_rep2	0.6023	0.495923	12610453
H3K27me3_4cell_rep1	0.5045	0.282611	11235786
H3K27me3_4cell_rep2	0.7848	0.416609	12208404
H3K27me3_8cell_rep1	0.5152	0.788523	3711251
H3K27me3_8cell_rep2	0.4017	0.558929	6885477
H3K27me3_blastocyst_rep1	0.6354	0.787425	4430345
H3K27me3_blastocyst_rep2	0.6769	0.747233	5144188
H3K27me3_MII_rep1	0.7217	0.427275	12916401
H3K27me3_MII_rep2	0.8484	0.684892	9378298
H3K27me3_morula_rep1	0.437	0.5996	2046643
H3K27me3_morula_rep2	0.4496	0.5561	2225646
H3K4me3_1cell_rep1	0.8617	0.183609	19526369
H3K4me3_1cell_rep2	0.9018	0.117436	12247766
H3K4me3_2cell_rep1	0.9265	0.289225	19356081
H3K4me3_2cell_rep2	0.9257	0.28537	19319125
H3K4me3_4cell_rep1	0.6213	0.156085	16776315
H3K4me3_4cell_rep2	0.8888	0.181452	12991103
H3K4me3_8cell_rep1	0.8598	0.305422	15179780
H3K4me3_8cell_rep2	0.8011	0.391269	13587788
H3K4me3_morula_rep1	0.8165	0.372561	12898544
H3K4me3_morula_rep2	0.8495	0.384821	16364207
H3K4me3_blastocyst_rep1	0.8568	0.295008	16991996
H3K4me3_blastocyst_rep2	0.8656	0.248747	15850817
H3K4me3_MII_rep1	0.9075	0.091612	13007416
H3K4me3_MII_rep2	0.9221	0.175266	19538666
H3K4me3_GV_rep1	0.8789	0.112062	11974675
H3K3me3_GV_rep2	0.9012	0.109076	10793104
H3K4me3_siKDM5BC_4cell_rep1	0.7665	0.2973	10395303
H3K4me3_siKDM5BC_4cell_rep2	0.6886	0.3664	9539718
