# Supplementary material for: Coordination of zygotic genome activation entry and exit by H3K4me3 and H3K27me3 in porcine early embryos
Source: HighWire-hosted journal article supplement (doi:10.1101/gr.276207.121), 2022-07-22
Supplement: Supplemental_Table_S3.xlsx [file Supplemental_Table_S3.xlsx]

## Sheet: Fig. S3E
Supplemental Table S3. Gene Ontology enrichment for gene clusters, distal H3K27me3-marked genes and bivalent genes
Cluster	ID	Description	GeneRatio	BgRatio	pvalue	p.adjust	qvalue	geneID	Count
C1	GO:0009887	animal organ morphogenesis	111/1083	319/8043	3.06976e-23	1.04648e-19	8.92493e-20	OTX1/GATA3/TBX2/GATA6/FOXJ1/LHX9/CTSZ/PHLDA2/FOXA1/DLL4/GBX2/FGF9/ZIC3/FOXI1/SFRP2/FOXL2/C5H12orf57/SALL1/HMX3/DLX1/DLX2/HOXA11/PAX9/HOXB5/NKX2-5/CDSN/FOXE1/GSX2/SOX9/ACTA1/FGF4/FGF21/NKX3-2/MDFI/RARA/WNT1/WT1/WNT2B/OSR2/TBX3/NAB2/TBX5/DLL1/POU4F3/HOXA9/BMP4/SIX1/SMAD7/GDF7/ACTC1/AQP6/NPPC/HOXA2/PTF1A/CRB2/NOG/LHX8/C8H4orf26/DSP/ALX1/FGF5/MESP1/ID2/MLLT3/SFRP1/AQP5/CHAD/STC1/SOX11/CYR61/LBX1/SIX4…	111
C1	GO:0048598	embryonic morphogenesis	73/1083	183/8043	2.05971e-19	3.51077e-16	2.99416e-16	OTX1/GATA3/TBX2/ADM/VENTX/DLL4/GBX2/ZIC3/TAL1/FOXI1/SFRP2/FOXL2/SALL1/HMX3/DLX2/HOXA11/HOXB5/FOXE1/SOX9/FGF4/HOXA10/NKX3-2/MDFI/RARA/APLN/WNT1/WNT2B/OSR2/TBX3/PDX1/TBX5/DLL1/TBX18/POU4F3/HOXA9/BMP4/SIX1/GDF7/HOXA2/CRB2/NOG/ALX1/MESP1/ID2/SFRP1/SOX11/CYR61/LBX1/SIX4/USH1G/HOXB6/LHX2/HOXB7/SHOX2/PTCH1/IGF2/GRB2/SOX17/SIX2/SRF/ITGA5/INHBA/LHFPL5/HOXB2/HOXD13/HOXA3/RGMA/PITX1/SOX4/GLI2/HOXC4/FUZ/HOXD3	73
C1	GO:0048568	embryonic organ development	61/1083	139/8043	7.58997e-19	7.27837e-16	6.20737e-16	KIT/OTX1/TBX2/CEBPA/PLCD3/ADM/PHLDA2/GBX2/ZIC3/TAL1/FOXI1/FOXL2/SALL1/HMX3/DLX2/HOXA11/HOXB5/FOXE1/SOX9/NKX3-2/MDFI/RARA/WNT1/OSR2/TBX3/DLL1/POU4F3/HOXA9/BMP4/SIX1/HOXA2/CRB2/NOG/ALX1/CITED1/MESP1/ID2/SOX11/CYR61/LBX1/SIX4/USH1G/HOXB6/HOXB7/SHOX2/PTCH1/EN2/IGF2/GRB2/SOX17/SIX2/SRF/VASH2/LHFPL5/HOXB2/HOXA3/LIF/JUNB/GLI2/HOXC4/HOXD3	61
C1	GO:0003002	regionalization	55/1083	117/8043	8.54019e-19	7.27837e-16	6.20737e-16	OTX1/DMRTA2/FOXJ1/FOXA1/DLL4/GBX2/ZIC3/SFRP2/DLX1/DLX2/HOXA11/HOXB5/NRARP/GSX2/HOXA5/NKX2-2/EGR2/HOXA10/WNT1/WT1/WNT2B/TBX3/HES2/DLL1/TBX18/HOXC6/HOXA9/BMP4/SIX1/MEOX1/HOXA2/CRB2/NOG/MESP1/MLLT3/SFRP1/HOXB6/LHX2/ISL1/HOXB7/NTF4/PTCH1/HOXC5/SOX17/SIX2/SRF/NKX2-1/HOXB2/HOXD13/DBX1/HOXA3/PROP1/GLI2/HOXC4/HOXD3	55
C1	GO:0007389	pattern specification process	60/1083	136/8043	1.07652e-18	7.33973e-16	6.25969e-16	OTX1/TBX2/DMRTA2/FOXJ1/FOXA1/DLL4/GBX2/ZIC3/SFRP2/DLX1/DLX2/HOXA11/HOXB5/NRARP/GSX2/HOXA5/NKX2-2/EGR2/HOXA10/NKX3-2/WNT1/WT1/WNT2B/TBX3/TBX5/HES2/DLL1/TBX18/HOXC6/HOXA9/BMP4/SIX1/MEOX1/HOXA2/CRB2/NOG/MESP1/MLLT3/SFRP1/STC1/LBX1/HOXB6/LHX2/ISL1/HOXB7/NTF4/PTCH1/HOXC5/SOX17/SIX2/SRF/NKX2-1/HOXB2/HOXD13/DBX1/HOXA3/PROP1/GLI2/HOXC4/HOXD3	60
C1	GO:0048646	anatomical structure formation involved in morphogenesis	112/1083	375/8043	1.48051e-17	8.41178e-15	7.174e-15	GATA3/TBX2/AQP1/GATA6/PLCD3/FOXJ1/ADM/GATA2/FOXA1/DLL4/GBX2/FUT1/TAL1/SFRP2/TNNT3/CBLN1/HOXA11/EHD2/NRARP/THBS2/SOX9/ACTA1/NECTIN2/EGR2/NKX3-2/RARA/CASQ1/MYMK/APLN/WNT1/WT1/CXCR3/WNT2B/TBX3/FURIN/CCBE1/TBX5/DLL1/TBX18/SPHK1/BMP4/SIX1/GDF7/MEOX1/ACTC1/ACKR3/PTF1A/CRB2/NOG/C8H4orf26/ANGPTL4/ENG/DSP/PROK1/MESP1/SFRP1/CHAD/SOX11/CYR61/CD9/SIX4/LHX2/ISL1/TCAP/ANGPTL2/NTF4/RHOB/PTCH1/THY1/VEGFD/PNLDC1/…	112
C1	GO:0007417	central nervous system development	80/1083	235/8043	2.42765e-16	1.18227e-13	1.0083e-13	OTX1/AQP1/DMRTA2/FOXJ1/DLL4/GBX2/SCT/FUT1/ZIC3/TAL1/SFRP2/C5H12orf57/SALL1/MXRA8/HMX3/CBLN1/DLX1/DLX2/POU3F2/GSX2/SOX9/NKX2-2/EGR2/VAX1/SOX10/WNT1/WNT2B/TBX3/DLL1/BARHL1/CXCR4/SPHK1/BMP4/OLIG2/SIX1/GDF7/HOXA2/PTF1A/NOG/LHX8/CITED1/HSD3B1/SFRP1/GHRH/OLIG3/SOX11/LBX1/AKNA/CCKAR/LHX2/MDGA1/ISL1/EPOR/HAPLN2/PTCH1/EN2/GLI1/S100A9/CEND1/SRF/GFAP/TFAP2D/NKX2-1/INHBA/PHACTR1/EPHB3/SMARCA1/HOXB2/BCAN/DBX1…	80
C1	GO:0009790	embryo development	96/1083	314/8043	6.89726e-16	2.93632e-13	2.50424e-13	KIT/OTX1/GATA3/TBX2/CEBPA/PLCD3/ADM/PHLDA2/FOXA1/VENTX/DLL4/GBX2/ZIC3/TAL1/FOXI1/EVX1/SFRP2/FOXL2/SALL1/HMX3/DLX1/DLX2/HOXA11/HOXB5/NRARP/FOXE1/SOX9/FGF4/HOXA10/NKX3-2/MDFI/RARA/APLN/WNT1/WT1/WNT2B/OSR2/TBX3/FURIN/PDX1/TBX5/DLL1/TBX18/PSPH/POU4F3/HOXC6/HOXA9/BMP4/SIX1/GDF7/MEOX1/HOXA2/CRB2/NOG/ALX1/CITED1/MESP1/ID2/SFRP1/SOX11/CYR61/LBX1/SIX4/USH1G/GDF9/HOXB6/LHX2/ISL1/HOXB7/SHOX2/PTCH1/EN2/PNLDC…	96
C1	GO:0048729	tissue morphogenesis	71/1083	199/8043	7.75209e-16	2.93632e-13	2.50424e-13	GATA3/TBX2/ADM/CTSZ/FOXA1/DLL4/GBX2/ZIC3/TAL1/SFRP2/SALL1/HOXA11/NRARP/NKX2-5/FOXE1/SOX9/ACTA1/SOX10/RARA/WNT1/WT1/WNT2B/TBX3/PDX1/TBX5/DLL1/TBX18/BMP4/SIX1/SMAD7/GDF7/ACTC1/CRB2/NOG/MESP1/MLLT3/SFRP1/STC1/TMEM79/SOX11/CYR61/LBX1/SIX4/LHX2/ISL1/HOXB7/TCAP/IGFBP5/SHOX2/RHOB/PTCH1/TACSTD2/GRB2/SOX17/SIX2/SRF/ITGA5/NKX2-1/INHBA/FKBPL/HOXB2/HOXD13/KRT25/ACTA2/HEYL/RGMA/LIF/SOX4/PLET1/GLI2/FUZ	71
C1	GO:0009952	anterior/posterior pattern specification	38/1083	71/8043	9.65856e-16	3.2926e-13	2.8081e-13	OTX1/GBX2/ZIC3/SFRP2/HOXA11/HOXB5/NRARP/HOXA5/HOXA10/WNT1/WT1/WNT2B/TBX3/HES2/DLL1/TBX18/HOXC6/HOXA9/BMP4/MEOX1/HOXA2/CRB2/NOG/MESP1/MLLT3/SFRP1/HOXB6/HOXB7/HOXC5/SOX17/SIX2/SRF/HOXB2/HOXD13/HOXA3/GLI2/HOXC4/HOXD3	38
C1	GO:0060322	head development	66/1083	180/8043	1.77395e-15	5.49765e-13	4.68867e-13	OTX1/AQP1/DMRTA2/FOXJ1/GBX2/SCT/FUT1/SFRP2/C5H12orf57/SALL1/HMX3/CBLN1/DLX1/DLX2/POU3F2/GSX2/SOX9/EGR2/VAX1/RARA/WNT1/WNT2B/OSR2/TBX3/DLL1/BARHL1/CXCR4/SPHK1/BMP4/OLIG2/GDF7/HOXA2/PTF1A/NOG/LHX8/CITED1/HSD3B1/SFRP1/GHRH/AKNA/CCKAR/LHX2/MDGA1/ISL1/EPOR/PTCH1/EN2/GLI1/CEND1/SRF/TFAP2D/NKX2-1/INHBA/PHACTR1/EPHB3/SMARCA1/HOXB2/BCAN/PITX1/TGFB3/ZIC1/PROP1/GLI2/LMX1A/NR2E1/NR4A2	66
C1	GO:0045165	cell fate commitment	52/1083	124/8043	3.10608e-15	8.82384e-13	7.52542e-13	GATA3/TBX2/DMRTA2/GATA6/GATA2/FOXA1/DLL4/TAL1/EBF2/SFRP2/DLX1/DLX2/HOXA11/GSX2/SOX9/NKX6-3/NKX2-2/RARA/WNT1/WNT2B/TBX3/MYOD1/TBX5/DLL1/TBX18/BMP4/OLIG2/SIX1/GDF7/HOXA2/PTF1A/MESP1/ID2/SFRP1/NR2F2/OLIG3/LBX1/ISL1/WNT4/NTF4/PTCH1/ONECUT1/SOX17/SIX2/DHH/IL6R/NKX2-1/TCF7L2/DBX1/PITX1/GLI2/NR2E1	52
C1	GO:0048562	embryonic organ morphogenesis	44/1083	94/8043	3.37253e-15	8.8438e-13	7.54244e-13	OTX1/TBX2/GBX2/ZIC3/FOXI1/FOXL2/HMX3/DLX2/HOXA11/HOXB5/FOXE1/SOX9/NKX3-2/MDFI/WNT1/OSR2/TBX3/DLL1/POU4F3/HOXA9/BMP4/SIX1/HOXA2/CRB2/NOG/ALX1/MESP1/ID2/SOX11/LBX1/SIX4/USH1G/HOXB6/HOXB7/SHOX2/SOX17/SIX2/SRF/LHFPL5/HOXB2/HOXA3/GLI2/HOXC4/HOXD3	44
C1	GO:0007420	brain development	62/1083	166/8043	4.78238e-15	1.16451e-12	9.93153e-13	OTX1/AQP1/DMRTA2/FOXJ1/GBX2/SCT/FUT1/SFRP2/C5H12orf57/SALL1/HMX3/CBLN1/DLX1/DLX2/POU3F2/GSX2/EGR2/VAX1/WNT1/WNT2B/TBX3/DLL1/BARHL1/CXCR4/SPHK1/BMP4/OLIG2/GDF7/HOXA2/PTF1A/NOG/LHX8/CITED1/HSD3B1/SFRP1/GHRH/AKNA/CCKAR/LHX2/MDGA1/ISL1/EPOR/PTCH1/EN2/GLI1/CEND1/SRF/TFAP2D/NKX2-1/INHBA/PHACTR1/EPHB3/SMARCA1/HOXB2/BCAN/PITX1/ZIC1/PROP1/GLI2/LMX1A/NR2E1/NR4A2	62
C1	GO:0035295	tube development	99/1083	338/8043	5.36117e-15	1.21842e-12	1.03913e-12	KIT/GATA3/TBX2/CEBPA/AQP1/GATA6/PLCD3/FOXJ1/ADM/CTSZ/GATA2/FOXA1/DLL4/GBX2/FGF9/FUT1/ZIC3/TAL1/SFRP2/SALL1/ADAMTSL2/HOXA11/NRARP/THBS2/FOXE1/SOX9/NKX2-2/NKX3-2/RARA/APLN/WNT1/WT1/CXCR3/WNT2B/TBX3/CCBE1/PDX1/TBX5/DLL1/TBX18/SPHK1/BMP4/SIX1/SMAD7/GDF7/ACKR3/NOG/ANGPTL4/ENG/PROK1/CITED1/MESP1/ID2/SFRP1/SOX11/CYR61/LBX1/SIX4/LHX2/ISL1/HOXB7/IGFBP5/ANGPTL2/SHOX2/RHOB/PTCH1/THY1/VEGFD/TACSTD2/SOX17/SIX…	99
C1	GO:0060429	epithelium development	92/1083	317/8043	9.69738e-14	2.06615e-11	1.76212e-11	GATA3/TBX2/GATA6/FOXJ1/ADM/CTSZ/FOXA1/TPP1/DLL4/GBX2/ZIC3/SFRP2/FOXL2/SALL1/ADAMTSL2/HOXA11/HOXB5/NRARP/FOXE1/SOX9/NKX6-3/NKX2-2/SOX10/NKX3-2/RARA/WNT1/WT1/WNT2B/TBX3/PDX1/TBX5/DLL1/TBX18/POU4F3/BMP4/SIX1/SMAD7/GDF7/MEOX1/CRB2/NOG/DSP/CDH1/MESP1/ID2/MLLT3/SFRP1/NR2F2/STC1/TMEM79/SOX11/CYR61/LBX1/SIX4/LHX2/HOXB7/IGFBP5/HAPLN2/RHOB/PTCH1/S1PR3/TACSTD2/MYCL/ONECUT1/GRB2/SOX17/SIX2/SRF/ITGA5/NKX2-1/I…	92
C1	GO:0035239	tube morphogenesis	84/1083	281/8043	2.04532e-13	4.10147e-11	3.49794e-11	GATA3/TBX2/AQP1/GATA6/PLCD3/ADM/CTSZ/GATA2/FOXA1/DLL4/GBX2/FUT1/ZIC3/TAL1/SFRP2/HOXA11/NRARP/THBS2/SOX9/RARA/APLN/WNT1/WT1/CXCR3/WNT2B/TBX3/CCBE1/DLL1/SPHK1/BMP4/SIX1/SMAD7/GDF7/ACKR3/NOG/ANGPTL4/ENG/PROK1/CITED1/MESP1/ID2/SFRP1/SOX11/CYR61/LBX1/SIX4/LHX2/ISL1/HOXB7/ANGPTL2/SHOX2/RHOB/PTCH1/THY1/VEGFD/TACSTD2/SOX17/SIX2/KIAA1024/SRF/MTDH/VASH2/ITGA5/NKX2-1/ENPP2/EPHB3/FKBPL/HOXB13/KLF2/SYK/RAMP2/…	84
C1	GO:0048663	neuron fate commitment	20/1083	26/8043	3.37835e-13	6.39821e-11	5.45672e-11	DMRTA2/FOXA1/DLL4/DLX1/DLX2/GSX2/NKX2-2/WNT1/DLL1/BMP4/OLIG2/SIX1/PTF1A/ID2/OLIG3/LBX1/ISL1/NKX2-1/DBX1/GLI2	20
C1	GO:0002009	morphogenesis of an epithelium	58/1083	164/8043	5.75303e-13	1.03222e-10	8.80326e-11	GATA3/TBX2/ADM/CTSZ/FOXA1/DLL4/GBX2/ZIC3/SFRP2/SALL1/HOXA11/NRARP/FOXE1/SOX9/SOX10/RARA/WNT1/WT1/WNT2B/TBX3/PDX1/TBX5/DLL1/TBX18/BMP4/SIX1/GDF7/NOG/MESP1/MLLT3/SFRP1/TMEM79/SOX11/CYR61/LBX1/SIX4/LHX2/HOXB7/IGFBP5/RHOB/PTCH1/TACSTD2/GRB2/SOX17/SIX2/SRF/ITGA5/NKX2-1/FKBPL/HOXB2/HOXD13/KRT25/RGMA/LIF/SOX4/PLET1/GLI2/FUZ	58
C1	GO:0048706	embryonic skeletal system development	24/1083	37/8043	6.18657e-13	1.0545e-10	8.99332e-11	DLX1/DLX2/HOXA11/HOXB5/NKX3-2/MDFI/OSR2/HOXC6/HOXA9/BMP4/SIX1/HOXA2/NOG/ALX1/SOX11/SIX4/HOXB6/HOXB7/SHOX2/SIX2/HOXB2/HOXA3/HOXC4/HOXD3	24
C1	GO:0009792	embryo development ending in birth or egg hatching	67/1083	209/8043	1.80979e-12	2.87184e-10	2.44925e-10	GATA3/CEBPA/PLCD3/ADM/PHLDA2/FOXA1/GBX2/EVX1/SFRP2/DLX1/DLX2/HOXA11/HOXB5/NRARP/SOX9/NKX3-2/MDFI/RARA/WNT1/OSR2/TBX3/FURIN/DLL1/TBX18/PSPH/HOXC6/HOXA9/BMP4/SIX1/GDF7/MEOX1/HOXA2/CRB2/NOG/ALX1/CITED1/MESP1/SFRP1/SOX11/CYR61/SIX4/GDF9/HOXB6/LHX2/ISL1/HOXB7/SHOX2/PTCH1/PNLDC1/IGF2/GRB2/SOX17/SIX2/SRF/VASH2/SEBOX/KLF2/HOXB2/HOXA3/RGMA/LIF/SOX4/JUNB/GLI2/HOXC4/FUZ/HOXD3	67
C1	GO:0048704	embryonic skeletal system morphogenesis	21/1083	30/8043	1.85334e-12	2.87184e-10	2.44925e-10	DLX2/HOXA11/HOXB5/MDFI/OSR2/HOXA9/BMP4/SIX1/HOXA2/NOG/ALX1/SOX11/SIX4/HOXB6/HOXB7/SHOX2/SIX2/HOXB2/HOXA3/HOXC4/HOXD3	21
C1	GO:0001501	skeletal system development	55/1083	157/8043	3.60065e-12	5.33678e-10	4.55148e-10	KIT/TAL1/SFRP2/DLX1/DLX2/HOXA11/HOXB5/SOX9/FGF4/HOXA10/NKX3-2/MDFI/RARA/WNT1/WNT2B/OSR2/TBX3/NAB2/CYTL1/HOXC6/HOXA9/BMP4/SIX1/SMAD7/C15H2orf82/NPPC/HOXA2/NOG/ALX1/SNAI2/SFRP1/CHAD/STC1/SOX11/CYR61/SIX4/HOXB6/HOXB7/RFLNB/HAPLN2/SHOX2/SIX2/SRF/ACTN3/RUNX1/BMPR2/HOXB2/HOXD13/HOXA3/HYAL2/PITX1/SOX4/GLI2/HOXC4/HOXD3	55
C1	GO:0072359	circulatory system development	90/1083	328/8043	6.10575e-12	8.67271e-10	7.39653e-10	TMEM204/GATA3/TBX2/AQP1/GATA6/PLCD3/FOXJ1/ADM/GATA2/DLL4/GBX2/IRX4/FUT1/ZIC3/TAL1/SFRP2/SALL1/NRARP/THBS2/NKX2-5/SOX9/RARA/APLN/WT1/CXCR3/TBX3/CCBE1/TBX5/DLL1/TBX18/SPHK1/BMP4/SIX1/SMAD7/ACTC1/ACKR3/CRB2/NOG/ANGPTL4/ENG/PROK1/CITED1/MESP1/ADRA1A/NR2F2/SOX11/CYR61/LBX1/NDP/ISL1/TCAP/EPOR/ANGPTL2/SHOX2/RHOB/PTCH1/THY1/VEGFD/DUSP6/SOX17/KIAA1024/SRF/MTDH/VASH2/ITGA5/ENPP2/EPHB3/BMPR2/FKBPL/HSPB7/TCF…	90
C1	GO:0001708	cell fate specification	23/1083	37/8043	7.02364e-12	9.57744e-10	8.16812e-10	TBX2/DMRTA2/FOXA1/SFRP2/HOXA11/GSX2/SOX9/NKX2-2/TBX3/TBX5/DLL1/TBX18/OLIG2/SIX1/MESP1/OLIG3/ISL1/PTCH1/SOX17/SIX2/DHH/DBX1/GLI2	23
C1	GO:0043009	chordate embryonic development	65/1083	206/8043	8.70127e-12	1.14087e-09	9.72992e-10	GATA3/CEBPA/PLCD3/ADM/PHLDA2/FOXA1/GBX2/SFRP2/DLX1/DLX2/HOXA11/HOXB5/NRARP/SOX9/NKX3-2/MDFI/RARA/WNT1/OSR2/TBX3/FURIN/DLL1/TBX18/PSPH/HOXC6/HOXA9/BMP4/SIX1/GDF7/MEOX1/HOXA2/CRB2/NOG/ALX1/CITED1/MESP1/SFRP1/SOX11/CYR61/SIX4/GDF9/HOXB6/LHX2/ISL1/HOXB7/SHOX2/PTCH1/PNLDC1/IGF2/GRB2/SOX17/SIX2/SRF/VASH2/KLF2/HOXB2/HOXA3/RGMA/LIF/SOX4/JUNB/GLI2/HOXC4/FUZ/HOXD3	65
C1	GO:0021953	central nervous system neuron differentiation	29/1083	57/8043	1.34804e-11	1.70203e-09	1.45158e-09	DLL4/GBX2/TAL1/SFRP2/C5H12orf57/CBLN1/DLX1/DLX2/GSX2/NKX2-2/WNT1/OLIG2/GDF7/LHX8/SFRP1/OLIG3/LBX1/ISL1/PTCH1/CEND1/NKX2-1/INHBA/EPHB3/DBX1/SOX4/GLI2/LMX1A/NR2E1/NR4A2	29
C1	GO:0048705	skeletal system morphogenesis	35/1083	82/8043	6.11163e-11	7.44091e-09	6.34599e-09	SFRP2/DLX2/HOXA11/HOXB5/SOX9/FGF4/NKX3-2/MDFI/RARA/OSR2/NAB2/HOXA9/BMP4/SIX1/NPPC/HOXA2/NOG/ALX1/SFRP1/CHAD/STC1/SOX11/SIX4/HOXB6/HOXB7/RFLNB/SHOX2/SIX2/ACTN3/BMPR2/HOXB2/HOXA3/HYAL2/HOXC4/HOXD3	35
C1	GO:0007423	sensory organ development	51/1083	150/8043	7.87111e-11	9.25262e-09	7.8911e-09	OTX1/GATA3/TBX2/CEBPA/DLL4/GBX2/FOXI1/FOXL2/C5H12orf57/HMX3/DLX1/DLX2/SOX9/VAX1/NKX3-2/RARA/WNT1/WT1/OSR2/LPCAT1/CYTL1/DLL1/POU4F3/BMP4/SIX1/HOXA2/PTF1A/CRB2/NOG/CDH1/AQP5/SOX11/SIX4/USH1G/NDP/LHX2/PROM1/NTF4/THY1/MYCL/SIX2/SRF/CHRDL1/INHBA/LHFPL5/RS1/CRYBB3/LOC100156107/GLI2/LOC100154892/NR2E1	51
C1	GO:0030900	forebrain development	39/1083	100/8043	1.34368e-10	1.52687e-08	1.30219e-08	OTX1/AQP1/DMRTA2/GBX2/SCT/FUT1/C5H12orf57/SALL1/DLX1/DLX2/GSX2/WNT1/WNT2B/TBX3/BMP4/OLIG2/GDF7/NOG/LHX8/HSD3B1/GHRH/AKNA/CCKAR/LHX2/MDGA1/ISL1/GLI1/SRF/NKX2-1/INHBA/PHACTR1/EPHB3/BCAN/PITX1/PROP1/GLI2/LMX1A/NR2E1/NR4A2	39
C1	GO:0021515	cell differentiation in spinal cord	14/1083	17/8043	2.73488e-10	3.00749e-08	2.56494e-08	DLL4/TAL1/GSX2/NKX2-2/WNT1/OLIG2/GDF7/OLIG3/LBX1/ISL1/PTCH1/DBX1/SOX4/GLI2	14
C1	GO:2000026	regulation of multicellular organismal development	104/1083	429/8043	4.1619e-10	4.43372e-08	3.7813e-08	GATA3/TBX2/PLXNB3/AQP1/DMRTA2/GATA6/FOXJ1/ADM/PHLDA2/GATA2/DLL4/GBX2/ISLR2/FUT1/TAL1/SFRP2/CBLN1/DLX1/DLX2/HOXA11/NRARP/THBS2/GSX2/SOX9/NKX6-3/NKX2-2/EGR2/VAX1/NKX3-2/RARA/WNT1/WT1/WNT2B/OSR2/TBX3/CCBE1/MYOD1/TBX5/HES2/DLL1/PCK1/NTRK1/SEMA6A/HOXA9/SPHK1/BMP4/OLIG2/SIX1/SMAD7/CRB2/GPR55/NOG/NR5A1/LRRC24/C8H4orf26/PROK1/MESP1/SNAI2/SFRP1/SOX11/CYR61/SIX4/GDF9/LHX2/ISL1/RFLNB/SHOX2/RHOB/PTCH1/THY1/S…	104
C1	GO:0051093	negative regulation of developmental process	73/1083	264/8043	4.57967e-10	4.73094e-08	4.03478e-08	GATA3/TBX2/FOXA2/FOXJ1/FOXA1/GPR3/SFRP2/CBLN1/DLX1/DLX2/NRARP/THBS2/NKX2-5/SOX9/NKX6-3/NKX2-2/CCDC85B/VAX1/NKX3-2/RARA/WNT1/WT1/TBX3/TBX5/DLL1/SEMA6A/HOXA9/BMP4/OLIG2/SMAD7/NPPC/HOXA2/GPR55/NOG/NR5A1/CITED1/CDH1/MESP1/SNAI2/SFRP1/CHAD/SOX11/LBX1/SIX4/TCF23/CDK12/LHX2/ISL1/RFLNB/IGFBP5/PTCH1/THY1/S1PR3/TACSTD2/CCL17/IGF2/SOX17/SIX2/KIAA1024/NFKBIA/NKX2-1/INHBA/HUWE1/TMEM176B/DMTN/KLF2/GDF15/RGMA/G…	73
C1	GO:0060562	epithelial tube morphogenesis	41/1083	113/8043	6.18285e-10	6.19922e-08	5.28701e-08	GATA3/TBX2/ADM/CTSZ/FOXA1/DLL4/GBX2/ZIC3/SFRP2/HOXA11/NRARP/SOX9/RARA/WNT1/WT1/WNT2B/TBX3/DLL1/BMP4/SIX1/GDF7/NOG/MESP1/SFRP1/SOX11/LBX1/SIX4/LHX2/HOXB7/RHOB/PTCH1/TACSTD2/SOX17/SIX2/SRF/NKX2-1/FKBPL/RGMA/SOX4/GLI2/FUZ	41
C1	GO:0072006	nephron development	20/1083	35/8043	1.41981e-09	1.38289e-07	1.1794e-07	GATA3/FOXJ1/SALL1/HOXA11/SOX9/WNT1/WT1/WNT2B/DLL1/BMP4/SIX1/NOG/SIX4/HOXB7/PTCH1/TACSTD2/SIX2/HEYL/LIF/GPR4	20
C1	GO:0030182	neuron differentiation	92/1083	372/8043	1.54708e-09	1.465e-07	1.24943e-07	FOXA2/PLXNB3/DMRTA2/PRDM12/LHX9/FOXA1/DLL4/GBX2/ISLR2/IRX4/TAL1/EVX1/SRCIN1/SFRP2/C5H12orf57/ADCYAP1/CBLN1/DLX1/DLX2/DPYSL4/NKX2-5/GSX2/EFHD1/SOX9/NKX2-2/EGR2/VAX1/WNT1/WNT2B/DLL1/NTRK1/SEMA6A/POU4F3/BMP4/OLIG2/SIX1/GDF7/HOXA2/PTF1A/CRB2/NOG/LHX8/ID2/SFRP1/DPYSL5/OLIG3/SYT17/SOX11/LBX1/USH1G/CCKAR/CNR1/LHX2/PROM1/ISL1/WNT4/NTF4/SHOX2/PTCH1/OTX2/THY1/EN2/VEGFD/MYCL/CEND1/BRINP3/SRF/FLOT1/VASH2/ITM…	92
C1	GO:0048665	neuron fate specification	10/1083	10/8043	1.88989e-09	1.74125e-07	1.48503e-07	DMRTA2/FOXA1/GSX2/NKX2-2/DLL1/SIX1/OLIG3/ISL1/DBX1/GLI2	10
C1	GO:0001709	cell fate determination	15/1083	21/8043	1.94693e-09	1.7466e-07	1.48959e-07	GATA3/TBX2/EBF2/NKX6-3/NKX2-2/WNT1/MYOD1/BMP4/HOXA2/MESP1/LBX1/ISL1/NTF4/PTCH1/SOX17	15
C1	GO:0061061	muscle structure development	61/1083	212/8043	2.42437e-09	2.11914e-07	1.80731e-07	TMEM204/TBX2/DMRTA2/GATA6/ADM/DLL4/SRPK3/FOXL2/TNNT3/MSC/SDC1/EHD2/NKX2-5/SOX9/ACTA1/EGR2/VAX1/RARA/CASQ1/MYMK/WNT1/WT1/TBX3/MYOD1/TBX5/DLL1/TBX18/BMP4/SIX1/SMAD7/ACTC1/NOG/MESP1/ADRA1A/SOX11/CD9/SIX4/TCF23/SMYD3/ISL1/TCAP/IGFBP5/SHOX2/CCL17/IGFBP3/IGF2/TNNT1/SRF/FLNC/ACTN3/FLOT1/UNC45B/CHRND/TCF7L2/RAMP2/GDF15/HEYL/PITX1/LIF/LMOD2/TNFSF14	61
C1	GO:0022008	neurogenesis	107/1083	460/8043	2.84978e-09	2.39557e-07	2.04306e-07	FOXA2/PLXNB3/DMRTA2/PRDM12/LHX9/FOXA1/DLL4/GBX2/ISLR2/IRX4/TAL1/EVX1/SRCIN1/SFRP2/C5H12orf57/ADCYAP1/MXRA8/CBLN1/DLX1/DLX2/DPYSL4/NKX2-5/GSX2/EFHD1/SOX9/NKX2-2/EGR2/VAX1/SOX10/WNT1/WNT2B/NAB2/HES2/DLL1/BARHL1/CXCR4/NTRK1/SEMA6A/POU4F3/BMP4/OLIG2/SIX1/GDF7/HOXA2/PTF1A/CRB2/NOG/LHX8/FGF5/MESP1/ID2/SFRP1/DPYSL5/OLIG3/SYT17/SOX11/LBX1/SIX4/USH1G/AKNA/CCKAR/CNR1/LHX2/MDGA1/PROM1/ISL1/WNT4/NTF4/ETV6/SH…	107
C1	GO:0001944	vasculature development	65/1083	233/8043	2.88115e-09	2.39557e-07	2.04306e-07	TMEM204/TBX2/AQP1/GATA6/PLCD3/ADM/GATA2/DLL4/GBX2/FUT1/TAL1/SFRP2/NRARP/THBS2/APLN/WT1/CXCR3/TBX3/CCBE1/DLL1/SPHK1/BMP4/SIX1/SMAD7/ACKR3/NOG/ANGPTL4/ENG/PROK1/CITED1/MESP1/NR2F2/CYR61/NDP/ISL1/ANGPTL2/RHOB/THY1/VEGFD/SOX17/KIAA1024/SRF/MTDH/VASH2/ITGA5/ENPP2/EPHB3/BMPR2/FKBPL/TCF7L2/HOXB13/KLF2/SYK/RAMP2/HOXA3/LEP/TGFBR3/LIF/ANGPT4/JUNB/PROP1/GPR4/IL18/ANPEP/NR2E1	65
C1	GO:0045596	negative regulation of cell differentiation	58/1083	199/8043	3.56667e-09	2.89495e-07	2.46896e-07	GATA3/FOXA2/FOXJ1/FOXA1/GPR3/SFRP2/DLX1/DLX2/NRARP/NKX2-5/SOX9/NKX6-3/NKX2-2/CCDC85B/VAX1/NKX3-2/RARA/WNT1/TBX3/DLL1/SEMA6A/HOXA9/BMP4/OLIG2/SMAD7/NPPC/HOXA2/GPR55/NOG/CITED1/CDH1/MESP1/SNAI2/SFRP1/SOX11/LBX1/SIX4/TCF23/CDK12/LHX2/ISL1/RFLNB/IGFBP5/PTCH1/THY1/S1PR3/TACSTD2/CCL17/IGF2/SIX2/NFKBIA/NKX2-1/TMEM176B/DMTN/GLI2/C1QC/LMX1A/NR2E1	58
C1	GO:0045595	regulation of cell differentiation	109/1083	474/8043	3.98168e-09	3.15664e-07	2.69214e-07	GATA3/CEBPA/FOXA2/PLXNB3/DMRTA2/FOXJ1/ADM/FOXA1/DLL4/GPR3/ISLR2/TAL1/SFRP2/DLX1/DLX2/HOXA11/NRARP/NKX2-5/GSX2/SOX9/NKX6-3/NKX2-2/CCDC85B/EGR2/VAX1/INS/NKX3-2/RARA/WNT1/TBX3/MYOD1/TBX5/TNF/HES2/DLL1/PCK1/SEMA6A/HOXA9/BMP4/OLIG2/SIX1/SMAD7/GDF7/NPPC/HOXA2/CRB2/GPR55/NOG/ALX1/CITED1/CDH1/MESP1/SNAI2/ID2/SFRP1/SOX11/CYR61/LBX1/SIX4/TCF23/GDF9/CDK12/LHX2/ISL1/RFLNB/IGFBP5/NTF4/SHOX2/PTCH1/THY1/S1PR3/T…	109
C1	GO:0061448	connective tissue development	37/1083	102/8043	4.29943e-09	3.33108e-07	2.84092e-07	FOXA1/EBF2/SFRP2/DLX2/HOXA11/SOX9/FGF4/NKX3-2/RARA/WT1/WNT2B/OSR2/CYTL1/BMP4/SMAD7/GDF7/C15H2orf82/NPPC/NOG/SNAI2/STC1/CYR61/RFLNB/SHOX2/SIX2/SRF/RUNX1/ARRDC3/BMPR2/PPARGC1A/HOXA3/HYAL2/PITX1/GPR4/GLI2/HOXC4/HOXD3	37
C1	GO:0072009	nephron epithelium development	19/1083	34/8043	6.14414e-09	4.65453e-07	3.96962e-07	GATA3/FOXJ1/SALL1/HOXA11/SOX9/WNT1/WT1/WNT2B/DLL1/BMP4/SIX1/NOG/SIX4/HOXB7/PTCH1/TACSTD2/SIX2/HEYL/LIF	19
C1	GO:0021510	spinal cord development	17/1083	28/8043	6.94864e-09	5.14955e-07	4.3918e-07	DLL4/TAL1/GSX2/NKX2-2/WNT1/DLL1/OLIG2/GDF7/NOG/OLIG3/SOX11/LBX1/ISL1/PTCH1/DBX1/SOX4/GLI2	17
C1	GO:0035270	endocrine system development	25/1083	56/8043	1.11765e-08	8.10651e-07	6.91364e-07	FOXA2/SALL1/NKX2-5/FOXE1/SOX9/NKX2-2/WT1/PDX1/DLL1/BMP4/HNF1B/SIX1/NOG/NR5A1/GHRH/ISL1/GLI1/ONECUT1/SRF/NKX2-1/HOXA3/PITX1/PROP1/GLI2/HOXD3	25
C1	GO:0016477	cell migration	109/1083	485/8043	1.53133e-08	1.08756e-06	9.27529e-07	KIT/CCR10/GATA3/PLXNB3/FOXJ1/PHLDA2/DLL4/GBX2/FGF9/FUT1/EVX1/SRCIN1/SFRP2/S100A14/DBH/FSCN1/SDC1/FOXE1/GSX2/SOX9/CD248/FGF4/FGF21/VAX1/SOX10/INS/ITGB2/NR4A3/CD99L2/RHOF/TMSB10/CXCR3/CCBE1/TBX5/BARHL1/CXCR4/SEMA6A/SPHK1/BMP4/RAC2/SIX1/CHGA/ACKR3/CRB2/NOG/ENG/ALX1/FGF5/MESP1/SNAI2/SFRP1/PODXL/PRTN3/NR2F2/GPC4/OLIG3/STC1/CYR61/SIX4/TMSB4X/GP2/CCKAR/MDGA1/ISL1/GRB10/LGR6/IGFBP5/RHOB/CCL1/THY1/VEGFD/T…	109
C1	GO:0048699	generation of neurons	97/1083	417/8043	1.66166e-08	1.15604e-06	9.85931e-07	FOXA2/PLXNB3/DMRTA2/PRDM12/LHX9/FOXA1/DLL4/GBX2/ISLR2/IRX4/TAL1/EVX1/SRCIN1/SFRP2/C5H12orf57/ADCYAP1/CBLN1/DLX1/DLX2/DPYSL4/NKX2-5/GSX2/EFHD1/SOX9/NKX2-2/EGR2/VAX1/WNT1/WNT2B/HES2/DLL1/BARHL1/NTRK1/SEMA6A/POU4F3/BMP4/OLIG2/SIX1/GDF7/HOXA2/PTF1A/CRB2/NOG/LHX8/ID2/SFRP1/DPYSL5/OLIG3/SYT17/SOX11/LBX1/SIX4/USH1G/AKNA/CCKAR/CNR1/LHX2/MDGA1/PROM1/ISL1/WNT4/NTF4/SHOX2/PTCH1/OTX2/THY1/EN2/VEGFD/MYCL/CEND…	97
C1	GO:0051241	negative regulation of multicellular organismal process	74/1083	291/8043	1.91167e-08	1.27922e-06	1.09098e-06	TNFRSF4/FOXA2/GATA6/FOXJ1/ADM/THBD/FOXA1/DLL4/SCT/SFRP2/CBLN1/DLX1/DLX2/NRARP/THBS2/SOX9/INHBB/VAX1/INS/NKX3-2/RARA/SOST/WT1/FURIN/TBX5/DLL1/SEMA6A/BMP4/SMAD7/GPR55/NOG/NR5A1/APOC3/MESP1/SNAI2/SFRP1/ADRA1A/BDKRB1/NR2F2/STC1/SOX11/CD9/TMSB4X/APOC2/LHX2/RFLNB/IGFBP5/PTCH1/NOVA2/THY1/TACSTD2/SOX17/KIAA1024/SRF/ACTN3/IL19/CPB2/NKX2-1/INHBA/ARRDC3/TMEM176B/KLF2/PLG/GDF15/TNFAIP3/TGFB3/PGR/ARHGDIB/GPR4…	74
C1	GO:0060485	mesenchyme development	37/1083	107/8043	1.91376e-08	1.27922e-06	1.09098e-06	TBX2/FOXA2/FOXA1/GBX2/SFRP2/SOX9/ACTA1/SOX10/WT1/TBX3/TBX5/SEMA6A/BMP4/SIX1/SMAD7/MEOX1/ACTC1/CRB2/NOG/ENG/ALX1/MESP1/SNAI2/SFRP1/SOX11/SIX4/AKNA/ISL1/RFLNB/SIX2/LOC100152566/NKX2-1/TCF7L2/ACTA2/HEYL/TGFBR3/TGFB3	37
C1	GO:0001568	blood vessel development	61/1083	223/8043	2.00912e-08	1.31713e-06	1.12332e-06	TBX2/AQP1/GATA6/PLCD3/ADM/GATA2/DLL4/GBX2/FUT1/TAL1/SFRP2/NRARP/THBS2/APLN/WT1/CXCR3/TBX3/CCBE1/DLL1/SPHK1/BMP4/SIX1/SMAD7/ACKR3/NOG/ANGPTL4/ENG/PROK1/CITED1/MESP1/CYR61/ISL1/ANGPTL2/RHOB/THY1/VEGFD/SOX17/KIAA1024/SRF/MTDH/VASH2/ITGA5/ENPP2/EPHB3/BMPR2/FKBPL/TCF7L2/HOXB13/KLF2/SYK/RAMP2/HOXA3/LEP/TGFBR3/ANGPT4/JUNB/PROP1/GPR4/IL18/ANPEP/NR2E1	61
C1	GO:0043010	camera-type eye development	30/1083	78/8043	2.68404e-08	1.69442e-06	1.44509e-06	TBX2/DLL4/FOXL2/C5H12orf57/DLX1/DLX2/SOX9/VAX1/RARA/WT1/OSR2/LPCAT1/DLL1/BMP4/PTF1A/CRB2/CDH1/AQP5/SOX11/NDP/LHX2/PROM1/THY1/SRF/INHBA/RS1/CRYBB3/LOC100156107/LOC100154892/NR2E1	30
C1	GO:0051216	cartilage development	30/1083	78/8043	2.68404e-08	1.69442e-06	1.44509e-06	SFRP2/DLX2/HOXA11/SOX9/FGF4/NKX3-2/RARA/WNT2B/OSR2/CYTL1/BMP4/SMAD7/C15H2orf82/NPPC/NOG/SNAI2/STC1/CYR61/RFLNB/SHOX2/SIX2/SRF/RUNX1/BMPR2/HOXA3/HYAL2/PITX1/GLI2/HOXC4/HOXD3	30
C1	GO:0072028	nephron morphogenesis	16/1083	27/8043	3.18848e-08	1.94098e-06	1.65537e-06	GATA3/SALL1/HOXA11/SOX9/WNT1/WT1/WNT2B/BMP4/SIX1/NOG/SIX4/HOXB7/PTCH1/TACSTD2/SIX2/LIF	16
C1	GO:0072088	nephron epithelium morphogenesis	16/1083	27/8043	3.18848e-08	1.94098e-06	1.65537e-06	GATA3/SALL1/HOXA11/SOX9/WNT1/WT1/WNT2B/BMP4/SIX1/NOG/SIX4/HOXB7/PTCH1/TACSTD2/SIX2/LIF	16
C1	GO:0045664	regulation of neuron differentiation	27/1083	67/8043	4.20303e-08	2.51371e-06	2.14382e-06	FOXA1/SFRP2/DLX1/DLX2/NKX2-5/SOX9/NKX2-2/DLL1/BMP4/OLIG2/SIX1/GDF7/HOXA2/ID2/SFRP1/SOX11/LBX1/ISL1/NTF4/MYCL/BRINP3/HEYL/NTF3/GLI2/LMX1A/NR2E1/HOXD3	27
C1	GO:0048514	blood vessel morphogenesis	56/1083	203/8043	5.62362e-08	3.2673e-06	2.78652e-06	TBX2/AQP1/GATA6/PLCD3/ADM/GATA2/DLL4/GBX2/FUT1/TAL1/SFRP2/NRARP/THBS2/APLN/WT1/CXCR3/CCBE1/DLL1/SPHK1/BMP4/SIX1/SMAD7/ACKR3/NOG/ANGPTL4/ENG/PROK1/CITED1/CYR61/ISL1/ANGPTL2/RHOB/THY1/VEGFD/SOX17/KIAA1024/SRF/MTDH/VASH2/ITGA5/ENPP2/EPHB3/FKBPL/HOXB13/KLF2/SYK/RAMP2/HOXA3/LEP/TGFBR3/ANGPT4/JUNB/GPR4/IL18/ANPEP/NR2E1	56
C1	GO:0060993	kidney morphogenesis	17/1083	31/8043	5.7506e-08	3.2673e-06	2.78652e-06	GATA3/FOXJ1/SALL1/HOXA11/SOX9/WNT1/WT1/WNT2B/BMP4/SIX1/NOG/SIX4/HOXB7/PTCH1/TACSTD2/SIX2/LIF	17
C1	GO:0072080	nephron tubule development	17/1083	31/8043	5.7506e-08	3.2673e-06	2.78652e-06	GATA3/HOXA11/SOX9/WNT1/WT1/WNT2B/DLL1/BMP4/SIX1/NOG/SIX4/HOXB7/PTCH1/TACSTD2/SIX2/HEYL/LIF	17
C1	GO:0007167	enzyme linked receptor protein signaling pathway	79/1083	326/8043	6.08967e-08	3.40323e-06	2.90245e-06	KIT/TMEM204/GATA3/MZB1/PTGIR/FGF9/SFRP2/ADAMTSL2/DLX1/FGF19/SOX9/INHBB/FGF4/FGF21/INS/NR4A3/APLN/SOST/WNT1/SHISA2/SLA/CCBE1/BMP7/PMEPA1/DLL1/NPPA/NTRK1/BMP4/SMAD7/GDF7/NPPC/CRB2/NOG/ENG/CITED1/FGF5/EFNB2/SFRP1/EFNA2/IGFBP4/SOX11/CYR61/IRS1/GDF9/BMP3/GRB10/IGFBP5/NTF4/RGMB/PDZD3/VEGFD/ONECUT1/SFRP5/PLAT/RNF115/INHA/IGFBP3/IGF2/GRB2/CHRDL1/IGFBP2/LOC100152566/NEDD9/HIP1R/NKX2-1/EGFR/INHBA/EPHB3/BMP…	79
C1	GO:0051094	positive regulation of developmental process	97/1083	428/8043	6.56773e-08	3.61119e-06	3.07981e-06	GATA3/TBX2/CEBPA/PLXNB3/AQP1/DMRTA2/GATA6/FOXJ1/ADM/GATA2/FOXA1/ISLR2/FUT1/TAL1/SFRP2/CBLN1/DLX1/DLX2/HOXA11/EHD2/NKX2-5/GSX2/SOX9/NKX2-2/EGR2/WNT1/WT1/WNT2B/OSR2/CCBE1/MYOD1/TBX5/DLL1/PCK1/NTRK1/SPHK1/BMP4/OLIG2/SIX1/SMAD7/GDF7/CRB2/NOG/NR5A1/LRRC24/C8H4orf26/ALX1/MESP1/SFRP1/GHRH/SYT17/TMEM79/SOX11/CYR61/SIX4/GDF9/ISL1/HOXB7/SHOX2/RHOB/PTCH1/VEGFD/TACSTD2/IGFBP3/SOX17/BRINP3/SRF/ACTN3/MTDH/FLOT…	97
C1	GO:0072073	kidney epithelium development	22/1083	49/8043	7.51692e-08	4.06749e-06	3.46896e-06	GATA3/FOXJ1/SALL1/HOXA11/SOX9/RARA/WNT1/WT1/WNT2B/DLL1/BMP4/SIX1/SMAD7/NOG/SFRP1/SIX4/HOXB7/PTCH1/TACSTD2/SIX2/HEYL/LIF	22
C1	GO:0061326	renal tubule development	17/1083	32/8043	1.0737e-07	5.71915e-06	4.87759e-06	GATA3/HOXA11/SOX9/WNT1/WT1/WNT2B/DLL1/BMP4/SIX1/NOG/SIX4/HOXB7/PTCH1/TACSTD2/SIX2/HEYL/LIF	17
C1	GO:0048880	sensory system development	32/1083	91/8043	1.11473e-07	5.84633e-06	4.98605e-06	TBX2/DLL4/FOXL2/C5H12orf57/DLX1/DLX2/SOX9/VAX1/RARA/WT1/OSR2/LPCAT1/DLL1/BMP4/PTF1A/CRB2/CDH1/AQP5/SOX11/NDP/LHX2/PROM1/ISL1/THY1/SRF/CHRDL1/INHBA/RS1/CRYBB3/LOC100156107/LOC100154892/NR2E1	32
C1	GO:0070848	response to growth factor	55/1083	202/8043	1.19682e-07	6.15354e-06	5.24805e-06	TMEM204/GATA3/GATA6/DLL4/FGF9/SFRP2/ADAMTSL2/DLX1/FGF19/SOX9/FGF4/FGF21/APLN/SOST/WNT1/SHISA2/CCBE1/BMP7/PMEPA1/DLL1/NTRK1/SPHK1/BMP4/SMAD7/GDF7/CRB2/NOG/ENG/CITED1/FGF5/SNAI2/SFRP1/SOX11/CYR61/GDF9/GRB10/NTF4/RGMB/VEGFD/CCL2/ONECUT1/SFRP5/CHRDL1/LOC100152566/NKX2-1/BMPR2/RAMP2/SMAD9/GDF15/HEYL/RGMA/HYAL2/TGFBR3/TGFB3/NTF3	55
C1	GO:0071363	cellular response to growth factor stimulus	54/1083	197/8043	1.22582e-07	6.15354e-06	5.24805e-06	TMEM204/GATA3/DLL4/FGF9/SFRP2/ADAMTSL2/DLX1/FGF19/SOX9/FGF4/FGF21/APLN/SOST/WNT1/SHISA2/CCBE1/BMP7/PMEPA1/DLL1/NTRK1/SPHK1/BMP4/SMAD7/GDF7/CRB2/NOG/ENG/CITED1/FGF5/SNAI2/SFRP1/SOX11/CYR61/GDF9/GRB10/NTF4/RGMB/VEGFD/CCL2/ONECUT1/SFRP5/CHRDL1/LOC100152566/NKX2-1/BMPR2/RAMP2/SMAD9/GDF15/HEYL/RGMA/HYAL2/TGFBR3/TGFB3/NTF3	54
C1	GO:0001654	eye development	31/1083	87/8043	1.24551e-07	6.15354e-06	5.24805e-06	TBX2/DLL4/FOXL2/C5H12orf57/DLX1/DLX2/SOX9/VAX1/RARA/WT1/OSR2/LPCAT1/DLL1/BMP4/PTF1A/CRB2/CDH1/AQP5/SOX11/NDP/LHX2/PROM1/THY1/SRF/CHRDL1/INHBA/RS1/CRYBB3/LOC100156107/LOC100154892/NR2E1	31
C1	GO:0150063	visual system development	31/1083	87/8043	1.24551e-07	6.15354e-06	5.24805e-06	TBX2/DLL4/FOXL2/C5H12orf57/DLX1/DLX2/SOX9/VAX1/RARA/WT1/OSR2/LPCAT1/DLL1/BMP4/PTF1A/CRB2/CDH1/AQP5/SOX11/NDP/LHX2/PROM1/THY1/SRF/CHRDL1/INHBA/RS1/CRYBB3/LOC100156107/LOC100154892/NR2E1	31
C1	GO:0001525	angiogenesis	49/1083	173/8043	1.58525e-07	7.72015e-06	6.58414e-06	AQP1/GATA6/PLCD3/ADM/GATA2/DLL4/GBX2/FUT1/TAL1/SFRP2/NRARP/THBS2/APLN/CXCR3/CCBE1/DLL1/SPHK1/BMP4/ACKR3/ANGPTL4/ENG/PROK1/CYR61/ISL1/ANGPTL2/RHOB/THY1/VEGFD/SOX17/KIAA1024/SRF/MTDH/VASH2/ITGA5/ENPP2/EPHB3/FKBPL/HOXB13/KLF2/SYK/RAMP2/HOXA3/LEP/TGFBR3/ANGPT4/GPR4/IL18/ANPEP/NR2E1	49
C1	GO:0071772	response to BMP	25/1083	63/8043	1.90459e-07	9.01769e-06	7.69074e-06	SFRP2/DLX1/SOX9/SOST/WNT1/BMP7/BMP4/SMAD7/GDF7/CRB2/NOG/SFRP1/SOX11/CYR61/GDF9/RGMB/SFRP5/CHRDL1/BMPR2/SMAD9/GDF15/HEYL/RGMA/TGFBR3/TGFB3	25
C1	GO:0071773	cellular response to BMP stimulus	25/1083	63/8043	1.90459e-07	9.01769e-06	7.69074e-06	SFRP2/DLX1/SOX9/SOST/WNT1/BMP7/BMP4/SMAD7/GDF7/CRB2/NOG/SFRP1/SOX11/CYR61/GDF9/RGMB/SFRP5/CHRDL1/BMPR2/SMAD9/GDF15/HEYL/RGMA/TGFBR3/TGFB3	25
C1	GO:0042692	muscle cell differentiation	42/1083	140/8043	2.18657e-07	1.0211e-05	8.70846e-06	TMEM204/TBX2/GATA6/ADM/TNNT3/SDC1/EHD2/NKX2-5/SOX9/ACTA1/RARA/CASQ1/MYMK/WNT1/TBX3/MYOD1/TBX5/DLL1/TBX18/BMP4/SIX1/ACTC1/MESP1/ADRA1A/CD9/SIX4/TCF23/SMYD3/ISL1/TCAP/IGFBP5/SHOX2/IGF2/TNNT1/SRF/FLNC/ACTN3/FLOT1/RAMP2/GDF15/LMOD2/TNFSF14	42
C1	GO:0001763	morphogenesis of a branching structure	31/1083	89/8043	2.2502e-07	1.03661e-05	8.84077e-06	ADM/CTSZ/FOXA1/DLL4/GBX2/SFRP2/DLX2/HOXA11/NRARP/SOX9/WNT1/WT1/WNT2B/TBX3/BMP4/SIX1/GDF7/NOG/SFRP1/SIX4/HOXB7/SHOX2/PTCH1/TACSTD2/GRB2/SIX2/SRF/NKX2-1/FKBPL/HOXD13/GLI2	31
C1	GO:0009953	dorsal/ventral pattern formation	16/1083	30/8043	2.38681e-07	1.08488e-05	9.25243e-06	FOXA1/DLL4/HOXA11/GSX2/NKX2-2/BMP4/HOXA2/NOG/SFRP1/LHX2/PTCH1/NKX2-1/HOXB2/DBX1/PROP1/GLI2	16
C1	GO:0090092	regulation of transmembrane receptor protein serine/threonine kinase signaling pathway	28/1083	77/8043	3.11086e-07	1.39538e-05	1.19005e-05	SFRP2/ADAMTSL2/DLX1/SOST/WNT1/BMP7/PMEPA1/BMP4/SMAD7/GDF7/CRB2/NOG/ENG/SFRP1/SOX11/CYR61/GDF9/BMP3/ONECUT1/SFRP5/INHA/CHRDL1/NKX2-1/INHBA/GDF15/RGMA/TGFBR3/TGFB3	28
C1	GO:0048732	gland development	41/1083	137/8043	3.27675e-07	1.4507e-05	1.23723e-05	TBX2/CEBPA/GATA6/FOXA1/ZIC3/SALL1/NKX2-5/FOXE1/SOX9/WT1/TBX3/PDX1/HOXA9/BMP4/HNF1B/SIX1/GDF7/NOG/NR5A1/MESP1/ID2/SFRP1/GHRH/SIX4/BSX/ISL1/IGFBP5/PTCH1/GLI1/ONECUT1/SRF/NKX2-1/EPHB3/HOXD13/HOXA3/TNFAIP3/PITX1/TGFB3/PROP1/GLI2/HOXD3	41
C1	GO:0048608	reproductive structure development	47/1083	168/8043	4.2293e-07	1.82502e-05	1.55647e-05	KIT/GATA3/CEBPA/GATA6/PLCD3/ADM/LHX9/PHLDA2/FOXA1/TFAP2C/SFRP2/FOXL2/SALL1/HOXA11/SOX9/HOXA10/MDFI/RARA/WT1/WNT2B/TBX3/HOXA9/BMP4/HNF1B/GDF7/NOG/NR5A1/LHX8/CITED1/SFRP1/NR2F2/CYR61/SIX4/NDP/TCF23/GDF9/EPOR/IGF2/GRB2/DHH/VASH2/NKX2-1/INHBA/HOXD13/LIF/JUNB/GLI2	47
C1	GO:0061458	reproductive system development	47/1083	168/8043	4.2293e-07	1.82502e-05	1.55647e-05	KIT/GATA3/CEBPA/GATA6/PLCD3/ADM/LHX9/PHLDA2/FOXA1/TFAP2C/SFRP2/FOXL2/SALL1/HOXA11/SOX9/HOXA10/MDFI/RARA/WT1/WNT2B/TBX3/HOXA9/BMP4/HNF1B/GDF7/NOG/NR5A1/LHX8/CITED1/SFRP1/NR2F2/CYR61/SIX4/NDP/TCF23/GDF9/EPOR/IGF2/GRB2/DHH/VASH2/NKX2-1/INHBA/HOXD13/LIF/JUNB/GLI2	47
C1	GO:0001823	mesonephros development	19/1083	42/8043	5.06831e-07	2.15238e-05	1.83566e-05	GATA3/FOXJ1/HOXA11/SOX9/RARA/WNT1/WT1/WNT2B/OSR2/BMP4/SIX1/SMAD7/NOG/SFRP1/SIX4/HOXB7/PTCH1/TACSTD2/SIX2	19
C1	GO:0061138	morphogenesis of a branching epithelium	29/1083	83/8043	5.1142e-07	2.15238e-05	1.83566e-05	ADM/CTSZ/FOXA1/DLL4/GBX2/SFRP2/HOXA11/NRARP/SOX9/WNT1/WT1/WNT2B/TBX3/BMP4/SIX1/GDF7/NOG/SFRP1/SIX4/HOXB7/PTCH1/TACSTD2/GRB2/SIX2/SRF/NKX2-1/FKBPL/HOXD13/GLI2	29
C1	GO:0090183	regulation of kidney development	11/1083	16/8043	5.74903e-07	2.37221e-05	2.02314e-05	GATA3/SOX9/WT1/WNT2B/BMP4/SIX1/NOG/SIX4/HOXB7/TACSTD2/SIX2	11
C1	GO:0001838	embryonic epithelial tube formation	17/1083	35/8043	5.77569e-07	2.37221e-05	2.02314e-05	GATA3/ADM/SFRP2/SOX9/RARA/BMP4/SIX1/GDF7/NOG/SFRP1/SOX11/SIX4/LHX2/PTCH1/RGMA/SOX4/FUZ	17
C1	GO:0060675	ureteric bud morphogenesis	14/1083	25/8043	6.22665e-07	2.46821e-05	2.10502e-05	GATA3/HOXA11/SOX9/WNT1/WT1/WNT2B/BMP4/SIX1/NOG/SIX4/HOXB7/PTCH1/TACSTD2/SIX2	14
C1	GO:0072078	nephron tubule morphogenesis	14/1083	25/8043	6.22665e-07	2.46821e-05	2.10502e-05	GATA3/HOXA11/SOX9/WNT1/WT1/WNT2B/BMP4/SIX1/NOG/SIX4/HOXB7/PTCH1/TACSTD2/SIX2	14
C1	GO:0072171	mesonephric tubule morphogenesis	14/1083	25/8043	6.22665e-07	2.46821e-05	2.10502e-05	GATA3/HOXA11/SOX9/WNT1/WT1/WNT2B/BMP4/SIX1/NOG/SIX4/HOXB7/PTCH1/TACSTD2/SIX2	14
C1	GO:0007267	cell-cell signaling	103/1083	484/8043	6.82277e-07	2.67343e-05	2.28003e-05	GATA3/TMEM88/WNT11/FOXA1/SCT/HCRT/PORCN/SHH/SFRP2/ADCYAP1/SALL1/CBLN1/SDC1/NRARP/SYNGR1/IHH/SOX9/INHBB/GAL/SOST/WNT1/SHISA2/CHRM1/WNT2B/TBX3/SSTR3/PDX1/LEF1/TBX5/TNF/PTGES/DLL1/TBX18/JPH4/SSTR2/BMP4/GCK/HNF1B/CHGA/NOG/MESP1/SNAI2/MLLT3/SFRP1/HTR1A/ADRA1A/GHRH/GPC4/SYT17/SOX11/CADPS2/DLG4/NDP/CCKAR/GDF9/KCNE5/HILPDA/CNR1/ISL1/WNT4/GRB10/LGR6/NTF4/SLC6A2/STRN/WNT3A/CCL2/S100A9/SFRP5/SLC17A6/SOX17/D…	103
C1	GO:0051146	striated muscle cell differentiation	34/1083	108/8043	9.11203e-07	3.52988e-05	3.01046e-05	TNNT3/SDC1/EHD2/NKX2-5/ACTA1/RARA/CASQ1/MYMK/WNT1/TBX3/MYOD1/TBX5/DLL1/TBX18/BMP4/SIX1/ACTC1/MESP1/ADRA1A/CD9/SIX4/SMYD3/ISL1/TCAP/IGFBP5/SHOX2/TNNT1/SRF/FLNC/ACTN3/FLOT1/GDF15/LMOD2/TNFSF14	34
C1	GO:0090287	regulation of cellular response to growth factor stimulus	28/1083	81/8043	1.02939e-06	3.94293e-05	3.36273e-05	TMEM204/GATA3/SFRP2/ADAMTSL2/DLX1/FGF4/APLN/SOST/WNT1/SHISA2/CCBE1/PMEPA1/DLL1/BMP4/SMAD7/CRB2/NOG/ENG/SFRP1/SOX11/CYR61/GRB10/ONECUT1/SFRP5/CHRDL1/NKX2-1/RGMA/TGFBR3	28
C1	GO:0060537	muscle tissue development	38/1083	128/8043	1.09988e-06	4.1661e-05	3.55306e-05	TBX2/DMRTA2/DLL4/SRPK3/FOXL2/MSC/NKX2-5/SOX9/ACTA1/EGR2/VAX1/RARA/TBX3/MYOD1/TBX5/DLL1/TBX18/BMP4/SIX1/SMAD7/ACTC1/NOG/MESP1/ADRA1A/SOX11/SIX4/ISL1/TCAP/IGFBP5/SHOX2/PTCH1/SRF/ACTN3/FLOT1/CHRND/PPARGC1A/HEYL/PITX1	38
C1	GO:0030509	BMP signaling pathway	23/1083	60/8043	1.21117e-06	4.53723e-05	3.86958e-05	SFRP2/DLX1/SOST/WNT1/BMP7/BMP4/SMAD7/GDF7/CRB2/NOG/SFRP1/SOX11/CYR61/GDF9/RGMB/SFRP5/CHRDL1/BMPR2/SMAD9/GDF15/RGMA/TGFBR3/TGFB3	23
C1	GO:0016331	morphogenesis of embryonic epithelium	21/1083	52/8043	1.29095e-06	4.78355e-05	4.07965e-05	GATA3/ADM/SFRP2/SOX9/RARA/WNT2B/PDX1/TBX18/BMP4/SIX1/GDF7/NOG/SFRP1/SOX11/SIX4/LHX2/PTCH1/RGMA/SOX4/GLI2/FUZ	21
C1	GO:0003007	heart morphogenesis	30/1083	91/8043	1.34802e-06	4.94128e-05	4.21418e-05	GATA3/TBX2/GATA6/DLL4/ZIC3/SFRP2/NKX2-5/SOX9/RARA/TBX3/TBX5/DLL1/BMP4/SIX1/SMAD7/ACTC1/NOG/MESP1/SOX11/CYR61/LBX1/ISL1/TCAP/SHOX2/PTCH1/SOX17/SRF/HEYL/SOX4/NPY2R	30
C1	GO:0090596	sensory organ morphogenesis	29/1083	87/8043	1.56228e-06	5.66575e-05	4.83204e-05	OTX1/TBX2/GBX2/FOXI1/FOXL2/C5H12orf57/HMX3/SOX9/NKX3-2/WNT1/OSR2/DLL1/POU4F3/BMP4/SIX1/HOXA2/PTF1A/CRB2/NOG/AQP5/SOX11/SIX4/USH1G/PROM1/THY1/SIX2/LHFPL5/RS1/GLI2	29
C1	GO:0021536	diencephalon development	15/1083	30/8043	1.68862e-06	6.05852e-05	5.16702e-05	OTX1/GBX2/SALL1/WNT1/BMP4/OLIG2/NOG/GHRH/ISL1/GLI1/NKX2-1/PITX1/PROP1/GLI2/NR4A2	15
C1	GO:0001657	ureteric bud development	18/1083	41/8043	1.74167e-06	6.05852e-05	5.16702e-05	GATA3/FOXJ1/HOXA11/SOX9/RARA/WNT1/WT1/WNT2B/BMP4/SIX1/SMAD7/NOG/SFRP1/SIX4/HOXB7/PTCH1/TACSTD2/SIX2	18
C1	GO:0072163	mesonephric epithelium development	18/1083	41/8043	1.74167e-06	6.05852e-05	5.16702e-05	GATA3/FOXJ1/HOXA11/SOX9/RARA/WNT1/WT1/WNT2B/BMP4/SIX1/SMAD7/NOG/SFRP1/SIX4/HOXB7/PTCH1/TACSTD2/SIX2	18
C1	GO:0072164	mesonephric tubule development	18/1083	41/8043	1.74167e-06	6.05852e-05	5.16702e-05	GATA3/FOXJ1/HOXA11/SOX9/RARA/WNT1/WT1/WNT2B/BMP4/SIX1/SMAD7/NOG/SFRP1/SIX4/HOXB7/PTCH1/TACSTD2/SIX2	18
C1	GO:0035107	appendage morphogenesis	20/1083	49/8043	1.89159e-06	6.3846e-05	5.44511e-05	TBX2/SFRP2/SALL1/HOXA11/SOX9/FGF4/HOXA10/OSR2/TBX3/TBX5/HOXA9/BMP4/NOG/SOX11/SHOX2/PTCH1/HOXD13/PITX1/SOX4/GLI2	20
C1	GO:0035108	limb morphogenesis	20/1083	49/8043	1.89159e-06	6.3846e-05	5.44511e-05	TBX2/SFRP2/SALL1/HOXA11/SOX9/FGF4/HOXA10/OSR2/TBX3/TBX5/HOXA9/BMP4/NOG/SOX11/SHOX2/PTCH1/HOXD13/PITX1/SOX4/GLI2	20
C1	GO:0055123	digestive system development	20/1083	49/8043	1.89159e-06	6.3846e-05	5.44511e-05	KIT/TBX2/GATA6/ZIC3/SFRP2/SALL1/FOXE1/NKX2-2/NKX3-2/PDX1/BMP4/ID2/SFRP1/SOX11/SHOX2/SOX17/SIX2/HIP1R/EPHB3/GLI2	20
C1	GO:0071542	dopaminergic neuron differentiation	9/1083	12/8043	2.11835e-06	7.01113e-05	5.97944e-05	FOXA2/DMRTA2/SFRP2/WNT1/SFRP1/OTX2/VEGFD/LMX1A/NR4A2	9
C1	GO:0090189	regulation of branching involved in ureteric bud morphogenesis	9/1083	12/8043	2.11835e-06	7.01113e-05	5.97944e-05	SOX9/WNT2B/BMP4/SIX1/NOG/SIX4/HOXB7/TACSTD2/SIX2	9
C1	GO:0061333	renal tubule morphogenesis	14/1083	27/8043	2.15291e-06	7.05698e-05	6.01855e-05	GATA3/HOXA11/SOX9/WNT1/WT1/WNT2B/BMP4/SIX1/NOG/SIX4/HOXB7/PTCH1/TACSTD2/SIX2	14
C1	GO:0007507	heart development	43/1083	157/8043	2.42619e-06	7.87704e-05	6.71794e-05	GATA3/TBX2/GATA6/FOXJ1/ADM/DLL4/IRX4/ZIC3/SFRP2/SALL1/NKX2-5/SOX9/RARA/APLN/WT1/TBX3/TBX5/DLL1/TBX18/BMP4/SIX1/SMAD7/ACTC1/NOG/MESP1/ADRA1A/SOX11/CYR61/LBX1/ISL1/TCAP/EPOR/SHOX2/PTCH1/DUSP6/SOX17/SRF/HSPB7/RAMP2/HEYL/SOX4/NPY2R/GLI2	43
C1	GO:0001658	branching involved in ureteric bud morphogenesis	13/1083	24/8043	2.63636e-06	8.47863e-05	7.23101e-05	HOXA11/SOX9/WNT1/WT1/WNT2B/BMP4/SIX1/NOG/SIX4/HOXB7/PTCH1/TACSTD2/SIX2	13
C1	GO:0003206	cardiac chamber morphogenesis	21/1083	54/8043	2.67637e-06	8.52687e-05	7.27215e-05	GATA3/TBX2/GATA6/DLL4/SFRP2/NKX2-5/RARA/TBX3/TBX5/BMP4/SMAD7/NOG/MESP1/SOX11/CYR61/ISL1/SHOX2/SRF/HEYL/SOX4/NPY2R	21
C1	GO:0014706	striated muscle tissue development	33/1083	108/8043	2.76393e-06	8.7243e-05	7.44053e-05	TBX2/DMRTA2/DLL4/FOXL2/MSC/NKX2-5/ACTA1/EGR2/VAX1/RARA/TBX3/MYOD1/TBX5/DLL1/TBX18/BMP4/SIX1/SMAD7/ACTC1/NOG/MESP1/ADRA1A/SOX11/SIX4/ISL1/TCAP/SHOX2/SRF/ACTN3/FLOT1/CHRND/HEYL/PITX1	33
C1	GO:0021517	ventral spinal cord development	10/1083	15/8043	2.97515e-06	9.30484e-05	7.93564e-05	DLL4/NKX2-2/OLIG2/OLIG3/LBX1/ISL1/PTCH1/DBX1/SOX4/GLI2	10
C1	GO:0048754	branching morphogenesis of an epithelial tube	25/1083	72/8043	3.53785e-06	0.000109641	9.35075e-05	CTSZ/FOXA1/DLL4/GBX2/SFRP2/HOXA11/NRARP/SOX9/WNT1/WT1/WNT2B/TBX3/BMP4/SIX1/GDF7/NOG/SIX4/HOXB7/PTCH1/TACSTD2/SIX2/SRF/NKX2-1/FKBPL/GLI2	25
C1	GO:0001656	metanephros development	14/1083	28/8043	3.7748e-06	0.00011214	9.56387e-05	GATA3/FOXJ1/SALL1/HOXA11/SOX9/WT1/OSR2/BMP4/SIX1/SIX4/PTCH1/SOX17/SIX2/LIF	14
C1	GO:0030510	regulation of BMP signaling pathway	14/1083	28/8043	3.7748e-06	0.00011214	9.56387e-05	SFRP2/DLX1/SOST/WNT1/BMP4/SMAD7/CRB2/NOG/SFRP1/SOX11/CYR61/SFRP5/CHRDL1/RGMA	14
C1	GO:0048736	appendage development	21/1083	55/8043	3.78683e-06	0.00011214	9.56387e-05	TBX2/SFRP2/SALL1/HOXA11/SOX9/FGF4/HOXA10/RARA/OSR2/TBX3/TBX5/HOXA9/BMP4/NOG/SOX11/SHOX2/PTCH1/HOXD13/PITX1/SOX4/GLI2	21
C1	GO:0060173	limb development	21/1083	55/8043	3.78683e-06	0.00011214	9.56387e-05	TBX2/SFRP2/SALL1/HOXA11/SOX9/FGF4/HOXA10/RARA/OSR2/TBX3/TBX5/HOXA9/BMP4/NOG/SOX11/SHOX2/PTCH1/HOXD13/PITX1/SOX4/GLI2	21
C1	GO:0030326	embryonic limb morphogenesis	17/1083	39/8043	3.81585e-06	0.00011214	9.56387e-05	TBX2/SFRP2/SALL1/HOXA11/FGF4/HOXA10/OSR2/TBX3/TBX5/HOXA9/BMP4/NOG/SHOX2/PTCH1/HOXD13/PITX1/GLI2	17
C1	GO:0035113	embryonic appendage morphogenesis	17/1083	39/8043	3.81585e-06	0.00011214	9.56387e-05	TBX2/SFRP2/SALL1/HOXA11/FGF4/HOXA10/OSR2/TBX3/TBX5/HOXA9/BMP4/NOG/SHOX2/PTCH1/HOXD13/PITX1/GLI2	17
C1	GO:0022603	regulation of anatomical structure morphogenesis	65/1083	279/8043	3.97742e-06	0.000115889	9.88361e-05	KIT/GATA3/TBX2/PLXNB3/AQP1/GATA6/FOXJ1/ADM/GATA2/ISLR2/FUT1/SRCIN1/SFRP2/HOXA11/THBS2/SOX9/RHOF/CDC42EP1/WT1/WNT2B/CCBE1/DLL1/SEMA6A/SPHK1/BMP4/SIX1/CRB2/NOG/PROK1/MESP1/MLLT3/SFRP1/SYT17/SIX4/ISL1/HOXB7/SHOX2/RHOB/THY1/VEGFD/TACSTD2/CCL2/SIX2/CDC42EP2/KIAA1024/SRF/MTDH/VASH2/NEDD9/ITGA5/HUWE1/ENPP2/EPHB3/FKBPL/DMTN/KLF2/C2H19orf35/HOXD13/RAMP2/TNFAIP3/LEP/LIF/GPR4/CLDN4/NR2E1	65
C1	GO:0048762	mesenchymal cell differentiation	27/1083	82/8043	4.64408e-06	0.000134167	0.000114424	FOXA2/FOXA1/GBX2/SFRP2/SOX9/SOX10/TBX3/SEMA6A/BMP4/SMAD7/CRB2/NOG/ENG/ALX1/SNAI2/SFRP1/SOX11/AKNA/ISL1/RFLNB/SIX2/LOC100152566/NKX2-1/TCF7L2/HEYL/TGFBR3/TGFB3	27
C1	GO:0060541	respiratory system development	25/1083	73/8043	4.703e-06	0.000134727	0.000114902	CEBPA/FOXJ1/CTSZ/FOXA1/FGF9/ZIC3/MSC/ADAMTSL2/SOX9/RARA/WT1/WNT2B/CCBE1/TBX5/BMP4/SIX1/NOG/SOX11/SIX4/IGFBP5/SRF/NKX2-1/KLF2/LIF/GLI2	25
C1	GO:0044057	regulation of system process	44/1083	167/8043	5.66257e-06	0.000160864	0.000137193	AQP1/ADM/AVPR2/SCT/HCRT/C5H12orf57/TNNT3/DBH/CBLN1/SCN4A/KCND3/NKX2-5/GSX2/INHBB/HRC/EGR2/CASQ1/MYMK/TBX18/SPHK1/SMAD7/HTR1A/ADRA1A/BDKRB1/STC1/GDF9/KCNE5/ISL1/IGFBP5/SHOX2/TNNT1/SRF/EDN1/ACTN3/AVPR1B/HIP1R/INHBA/RANGRF/KCNE4/ADM5/PGR/GALR1/APOA5/EDN3	44
C1	GO:0072175	epithelial tube formation	17/1083	40/8043	5.81117e-06	0.000163721	0.00013963	GATA3/ADM/SFRP2/SOX9/RARA/BMP4/SIX1/GDF7/NOG/SFRP1/SOX11/SIX4/LHX2/PTCH1/RGMA/SOX4/FUZ	17
C1	GO:0048565	digestive tract development	19/1083	48/8043	5.87714e-06	0.000164223	0.000140057	KIT/TBX2/GATA6/ZIC3/SFRP2/SALL1/FOXE1/NKX2-2/NKX3-2/PDX1/BMP4/ID2/SFRP1/SOX11/SHOX2/SOX17/SIX2/EPHB3/GLI2	19
C1	GO:0030855	epithelial cell differentiation	49/1083	194/8043	6.12668e-06	0.000169804	0.000144817	GATA3/GATA6/FOXJ1/FOXA1/TPP1/FOXL2/SALL1/HOXB5/SOX9/NKX6-3/NKX2-2/NKX3-2/RARA/WT1/TBX3/PDX1/DLL1/POU4F3/BMP4/SIX1/GDF7/DSP/CDH1/MESP1/ID2/NR2F2/STC1/TMEM79/SOX11/HAPLN2/PTCH1/S1PR3/MYCL/ONECUT1/SOX17/SIX2/NKX2-1/LOC106510158/KLF2/LHFPL5/KRT36/ETV4/IVL/LIF/SOX4/GPR4/IL31/BDH2/PROC	49
C1	GO:0001837	epithelial to mesenchymal transition	21/1083	57/8043	7.34047e-06	0.000201804	0.000172108	FOXA2/FOXA1/SFRP2/SOX9/TBX3/BMP4/SMAD7/CRB2/NOG/ENG/ALX1/SNAI2/SFRP1/AKNA/RFLNB/LOC100152566/NKX2-1/TCF7L2/HEYL/TGFBR3/TGFB3	21
C1	GO:0045597	positive regulation of cell differentiation	61/1083	262/8043	8.06634e-06	0.000219985	0.000187615	GATA3/CEBPA/PLXNB3/DMRTA2/FOXJ1/ADM/FOXA1/ISLR2/TAL1/SFRP2/DLX1/DLX2/HOXA11/NKX2-5/GSX2/SOX9/NKX2-2/EGR2/MYOD1/TBX5/PCK1/BMP4/OLIG2/SIX1/SMAD7/GDF7/CRB2/ALX1/MESP1/SFRP1/SOX11/CYR61/GDF9/ISL1/SHOX2/PTCH1/TACSTD2/IGFBP3/SOX17/BRINP3/SRF/ACTN3/GFAP/LOC100152566/NEDD9/INHBA/RUNX1/DMTN/TCF7L2/RAMP2/ADIG/HEYL/ETV4/TNFSF9/TGFB3/LIF/JUNB/GLI2/TNFSF14/PROC/HOXD3	61
C1	GO:0007178	transmembrane receptor protein serine/threonine kinase signaling pathway	34/1083	119/8043	1.01429e-05	0.000274422	0.000234041	SFRP2/ADAMTSL2/DLX1/INHBB/SOST/WNT1/BMP7/PMEPA1/BMP4/SMAD7/GDF7/CRB2/NOG/ENG/CITED1/SFRP1/SOX11/CYR61/GDF9/BMP3/RGMB/ONECUT1/SFRP5/INHA/CHRDL1/LOC100152566/NKX2-1/INHBA/BMPR2/SMAD9/GDF15/RGMA/TGFBR3/TGFB3	34
C1	GO:0061053	somite development	14/1083	30/8043	1.05197e-05	0.000282376	0.000240825	SFRP2/NRARP/WNT1/DLL1/TBX18/SIX1/MEOX1/CRB2/NOG/MESP1/SFRP1/SOX11/SIX4/PTCH1	14
C1	GO:0021522	spinal cord motor neuron differentiation	8/1083	11/8043	1.19329e-05	0.000315342	0.00026894	NKX2-2/OLIG2/OLIG3/LBX1/ISL1/PTCH1/SOX4/GLI2	8
C1	GO:0061037	negative regulation of cartilage development	8/1083	11/8043	1.19329e-05	0.000315342	0.00026894	SOX9/NKX3-2/RARA/BMP4/NOG/SNAI2/RFLNB/GLI2	8
C1	GO:0055001	muscle cell development	24/1083	72/8043	1.23078e-05	0.000322749	0.000275257	ADM/TNNT3/SDC1/ACTA1/CASQ1/TBX3/MYOD1/TBX5/TBX18/BMP4/SIX1/ACTC1/ADRA1A/SIX4/SMYD3/ISL1/TCAP/SHOX2/TNNT1/SRF/FLNC/ACTN3/RAMP2/LMOD2	24
C1	GO:0021915	neural tube development	18/1083	46/8043	1.24877e-05	0.000324966	0.000277147	ADM/FOXA1/GBX2/SFRP2/RARA/WNT1/BMP4/GDF7/NOG/SFRP1/SOX11/LHX2/PTCH1/SOX17/RGMA/SOX4/GLI2/FUZ	18
C1	GO:0003205	cardiac chamber development	21/1083	59/8043	1.36729e-05	0.000353114	0.000301153	GATA3/TBX2/GATA6/DLL4/SFRP2/NKX2-5/RARA/TBX3/TBX5/BMP4/SMAD7/NOG/MESP1/SOX11/CYR61/ISL1/SHOX2/SRF/HEYL/SOX4/NPY2R	21
C1	GO:0032330	regulation of chondrocyte differentiation	10/1083	17/8043	1.48971e-05	0.000378985	0.000323218	HOXA11/SOX9/NKX3-2/BMP4/SMAD7/SNAI2/RFLNB/SHOX2/SIX2/GLI2	10
C1	GO:0048546	digestive tract morphogenesis	10/1083	17/8043	1.48971e-05	0.000378985	0.000323218	SFRP2/BMP4/ID2/SFRP1/SOX11/SHOX2/SOX17/SIX2/EPHB3/GLI2	10
C1	GO:0072001	renal system development	28/1083	92/8043	1.68648e-05	0.000425868	0.000363202	GATA3/FOXJ1/SALL1/HOXA11/SOX9/RARA/WNT1/WT1/WNT2B/OSR2/DLL1/TBX18/BMP4/HNF1B/SIX1/SMAD7/NOG/SFRP1/SIX4/HOXB7/PTCH1/TACSTD2/SOX17/SIX2/HEYL/LIF/GPR4/GLI2	28
C1	GO:0001655	urogenital system development	31/1083	107/8043	1.82519e-05	0.00045483	0.000387902	GATA3/FOXJ1/FOXA1/SALL1/HOXA11/SOX9/RARA/WNT1/WT1/WNT2B/OSR2/DLL1/TBX18/BMP4/HNF1B/SIX1/SMAD7/NOG/SFRP1/SIX4/HOXB7/PTCH1/TACSTD2/SOX17/SIX2/EPHB3/HOXD13/HEYL/LIF/GPR4/GLI2	31
C1	GO:1905330	regulation of morphogenesis of an epithelium	15/1083	35/8043	1.82786e-05	0.00045483	0.000387902	GATA3/TBX2/SOX9/WNT2B/BMP4/SIX1/NOG/SFRP1/SIX4/HOXB7/TACSTD2/SIX2/FKBPL/HOXD13/LIF	15
C1	GO:0043583	ear development	23/1083	70/8043	2.4248e-05	0.000598996	0.000510854	OTX1/GATA3/CEBPA/GBX2/FOXI1/HMX3/SOX9/NKX3-2/WNT1/OSR2/CYTL1/DLL1/POU4F3/BMP4/SIX1/HOXA2/NOG/SIX4/USH1G/MYCL/SIX2/LHFPL5/GLI2	23
C1	GO:0035148	tube formation	17/1083	44/8043	2.64484e-05	0.000644019	0.000549252	GATA3/ADM/SFRP2/SOX9/RARA/BMP4/SIX1/GDF7/NOG/SFRP1/SOX11/SIX4/LHX2/PTCH1/RGMA/SOX4/FUZ	17
C1	GO:0042471	ear morphogenesis	17/1083	44/8043	2.64484e-05	0.000644019	0.000549252	OTX1/GBX2/FOXI1/HMX3/SOX9/NKX3-2/WNT1/OSR2/POU4F3/SIX1/HOXA2/NOG/SIX4/USH1G/SIX2/LHFPL5/GLI2	17
C1	GO:0035051	cardiocyte differentiation	16/1083	40/8043	2.74317e-05	0.000658554	0.000561648	TBX2/GATA6/RARA/TBX3/TBX5/DLL1/TBX18/BMP4/ACTC1/MESP1/ADRA1A/ISL1/TCAP/SHOX2/SOX17/SRF	16
C1	GO:2000027	regulation of animal organ morphogenesis	16/1083	40/8043	2.74317e-05	0.000658554	0.000561648	GATA3/SFRP2/HOXA11/SOX9/WT1/WNT2B/BMP4/SIX1/NOG/MESP1/MLLT3/SFRP1/SIX4/HOXB7/TACSTD2/SIX2	16
C1	GO:0001822	kidney development	27/1083	90/8043	3.16423e-05	0.000754327	0.000643328	GATA3/FOXJ1/SALL1/HOXA11/SOX9/RARA/WNT1/WT1/WNT2B/OSR2/DLL1/BMP4/HNF1B/SIX1/SMAD7/NOG/SFRP1/SIX4/HOXB7/PTCH1/TACSTD2/SOX17/SIX2/HEYL/LIF/GPR4/GLI2	27
C1	GO:0021537	telencephalon development	21/1083	62/8043	3.2491e-05	0.000763874	0.00065147	AQP1/DMRTA2/SCT/FUT1/C5H12orf57/SALL1/DLX1/DLX2/GSX2/BMP4/HSD3B1/LHX2/MDGA1/SRF/NKX2-1/INHBA/PHACTR1/EPHB3/BCAN/LMX1A/NR2E1	21
C1	GO:0048863	stem cell differentiation	21/1083	62/8043	3.2491e-05	0.000763874	0.00065147	KIT/TBX2/FOXA1/GBX2/TAL1/SOX9/SOX10/TBX5/SEMA6A/BMP4/ALX1/SNAI2/MLLT3/SFRP1/SOX11/CDK12/ISL1/TACSTD2/SOX17/SRF/LIF	21
C1	GO:0035282	segmentation	14/1083	33/8043	3.99559e-05	0.000932943	0.000795661	SFRP2/NRARP/EGR2/WT1/TBX3/DLL1/TBX18/BMP4/MEOX1/HOXA2/CRB2/MESP1/MLLT3/SFRP1	14
C1	GO:0021675	nerve development	11/1083	22/8043	4.26811e-05	0.000989796	0.000844148	EGR2/NTRK1/POU4F3/SIX1/SIX4/ISL1/NTF4/HOXB2/HOXA3/NTF3/HOXD3	11
C1	GO:0008284	positive regulation of cell population proliferation	73/1083	348/8043	5.06461e-05	0.00116657	0.000994911	TNFRSF4/TBX2/MZB1/PLXNB3/AQP1/DMRTA2/GATA6/ADM/DLL4/FGF9/SFRP2/TRAF5/FGF19/NRARP/SOX9/CLEC11A/CD248/FGF4/FGF21/INS/NR4A3/RARA/APLN/WNT1/OSR2/TBX3/PDX1/TBX5/DLL1/SPHK1/BMP4/RAC2/SIX1/NOG/PROK1/CDH1/FGF5/ID2/SFRP1/GHRH/TIMP1/SOX11/CYR61/GHRHR/GDF9/HILPDA/LHX2/ISL1/CD40LG/IGFBP5/HMOX1/SHOX2/VEGFD/IGF2/SIX2/IL6R/IGFBP2/VASH2/GFAP/TCF7L2/PRLR/HOXA3/TNFAIP3/LEP/TNFSF9/TGFB3/LIF/SOX4/IL31/HAVCR2/GLI2/IL…	73
C1	GO:0021983	pituitary gland development	10/1083	19/8043	5.47457e-05	0.00125254	0.00106823	SALL1/BMP4/NOG/GHRH/ISL1/GLI1/NKX2-1/PITX1/PROP1/GLI2	10
C1	GO:0002062	chondrocyte differentiation	16/1083	42/8043	5.58134e-05	0.00126845	0.0010818	SFRP2/HOXA11/SOX9/NKX3-2/WNT2B/OSR2/CYTL1/BMP4/SMAD7/NPPC/SNAI2/RFLNB/SHOX2/SIX2/RUNX1/GLI2	16
C1	GO:0001841	neural tube formation	13/1083	30/8043	5.77174e-05	0.00130304	0.0011113	ADM/SFRP2/RARA/BMP4/GDF7/NOG/SFRP1/SOX11/LHX2/PTCH1/RGMA/SOX4/FUZ	13
C1	GO:0030902	hindbrain development	15/1083	38/8043	5.86684e-05	0.00131579	0.00112218	OTX1/GBX2/CBLN1/GSX2/EGR2/WNT1/DLL1/HOXA2/PTF1A/NOG/EN2/CEND1/HOXB2/GLI2/LMX1A	15
C1	GO:0061035	regulation of cartilage development	14/1083	34/8043	5.95838e-05	0.00132759	0.00113223	HOXA11/SOX9/NKX3-2/RARA/BMP4/SMAD7/NOG/SNAI2/CYR61/RFLNB/SHOX2/SIX2/BMPR2/GLI2	14
C1	GO:0048483	autonomic nervous system development	9/1083	16/8043	6.61803e-05	0.00145554	0.00124136	GATA3/GBX2/EGR2/SOX10/NTRK1/SIX1/SOX11/HOXB2/SOX4	9
C1	GO:0061005	cell differentiation involved in kidney development	9/1083	16/8043	6.61803e-05	0.00145554	0.00124136	GATA3/FOXJ1/SALL1/WT1/BMP4/PTCH1/SIX2/LIF/GPR4	9
C1	GO:0035850	epithelial cell differentiation involved in kidney development	8/1083	13/8043	7.23656e-05	0.00158137	0.00134868	GATA3/FOXJ1/SALL1/WT1/BMP4/SIX2/LIF/GPR4	8
C1	GO:0007219	Notch signaling pathway	22/1083	70/8043	7.77678e-05	0.0016886	0.00144013	TBX2/CEBPA/JAG1/FOXA1/DLL4/DLX1/DLX2/NRARP/GSX2/SOX9/WNT1/DLL1/MESP1/SNAI2/S1PR3/ONECUT1/NOTCH4/NFKBIA/DTX3/PSENEN/HEYL/HOXD3	22
C1	GO:0009798	axis specification	12/1083	27/8043	8.25994e-05	0.00178216	0.00151992	NRARP/WNT1/WT1/TBX3/DLL1/BMP4/MESP1/SFRP1/STC1/PTCH1/SIX2/SRF	12
C1	GO:0048645	animal organ formation	13/1083	31/8043	8.72529e-05	0.00185903	0.00158548	HOXA11/NKX3-2/WT1/WNT2B/TBX5/BMP4/SIX1/NOG/MESP1/ISL1/NTF4/HOXA3/GLI2	13
C1	GO:0060411	cardiac septum morphogenesis	13/1083	31/8043	8.72529e-05	0.00185903	0.00158548	TBX2/GATA6/NKX2-5/RARA/TBX3/TBX5/BMP4/SMAD7/NOG/SOX11/CYR61/ISL1/HEYL	13
C1	GO:0008544	epidermis development	23/1083	76/8043	0.000103441	0.00219025	0.00186796	GATA6/FOXE1/SOX9/KRTDAP/NAB2/DLL1/POU4F3/BMP4/CST6/TMEM79/LHX2/IGFBP5/NTF4/PTCH1/MYCL/INHBA/LOC106510158/LHFPL5/KRT25/KRT36/ETV4/IVL/GLI2	23
C1	GO:0030856	regulation of epithelial cell differentiation	15/1083	40/8043	0.000117295	0.00246827	0.00210507	GATA3/FOXJ1/SOX9/NKX6-3/TBX3/DLL1/BMP4/MESP1/PTCH1/S1PR3/MYCL/KRT36/ETV4/LIF/PROC	15
C1	GO:0032989	cellular component morphogenesis	48/1083	210/8043	0.000119526	0.00249978	0.00213194	PLXNB3/GBX2/ISLR2/EVX1/SRCIN1/C5H12orf57/TNNT3/DPYSL4/ACTA1/NECTIN2/EGR2/VAX1/CASQ1/NTRK1/SEMA6A/POU4F3/GDF7/ACTC1/HOXA2/NOG/DPYSL5/SYT17/CD9/SIX4/CCKAR/LHX2/ISL1/TCAP/NTF4/SHOX2/OTX2/THY1/TNNT1/SRF/FLOT1/NKX2-1/NYAP1/ENPP2/PHACTR1/EPHB3/MTM1/NTF3/LMOD2/GLI2/ACRBP/LMX1A/NR2E1/NR4A2	48
C1	GO:0003151	outflow tract morphogenesis	14/1083	36/8043	0.000125081	0.00260001	0.00221742	TBX2/GATA6/SFRP2/NKX2-5/RARA/TBX3/BMP4/SIX1/NOG/SOX11/ISL1/SOX17/HEYL/NPY2R	14
C1	GO:0007517	muscle organ development	29/1083	107/8043	0.000127126	0.0026265	0.00224001	DMRTA2/DLL4/SRPK3/FOXL2/MSC/NKX2-5/ACTA1/EGR2/VAX1/WT1/MYOD1/DLL1/BMP4/SIX1/SMAD7/ACTC1/NOG/SOX11/SIX4/ISL1/TCAP/SHOX2/ACTN3/FLOT1/UNC45B/CHRND/HEYL/PITX1/LIF	29
C1	GO:0009967	positive regulation of signal transduction	91/1083	469/8043	0.00013499	0.00277218	0.00236425	KIT/GATA3/KCNN4/FOXA1/NR3C2/DLL4/GPR20/SFRP2/ADCYAP1/SALL1/TRAF5/FGF19/NRARP/GSX2/SOX9/NECTIN2/FGF4/FGF21/INS/WNT1/CCBE1/BMP7/TNF/DLL1/CXCR4/NTRK1/GADD45B/SPHK1/BMP4/GDF7/TNFRSF12A/GADD45G/ACKR3/CRB2/GPR55/PROK1/RHEB/MESP1/MLLT3/SFRP1/ADRA1A/SOX11/MOS/CYR61/RASGRP4/GDF9/BMP3/CD40LG/GRB10/LGR6/S100A12/IGFBP5/HMOX1/SHOX2/CCL1/G0S2/CCL2/TELO2/CLU/CCL17/SCIMP/INHA/IGF2/C3/IL6R/MTDH/IFI35/FLOT1/AVPR1B…	91
C1	GO:0007155	cell adhesion	90/1083	464/8043	0.000148794	0.00303735	0.0025904	KIT/TNFRSF4/GATA3/PLXNB3/FOXJ1/FUT1/CD93/SRCIN1/MXRA8/CBLN1/NRARP/THBS2/SOX9/NECTIN2/ITGB2/NR4A3/LOC100155738/ICAM4/PCDH11X/WNT1/CLDN6/CXCR3/CLDN19/DLL1/EPHA4/PCK1/CXCR4/FUT2/BMP4/RAC2/SMAD7/CRB2/ENG/JUP/CDH1/SNAI2/PODXL/GPC4/ESAM/DLG4/CYR61/CD9/PEAR1/AKNA/TNC/ANXA9/CD40LG/HAPLN2/RGMB/RHOB/PCDH7/THY1/TACSTD2/S100A9/ONECUT1/IGF2/SRF/FLOT1/IGFBP2/LOC100152566/NEDD9/ITGA5/SIRPA/KIRREL/AMIGO2/EPHB3/A…	90
C1	GO:0021772	olfactory bulb development	7/1083	11/8043	0.000158457	0.00317753	0.00270996	FUT1/SALL1/DLX2/GSX2/LHX2/SRF/NR2E1	7
C1	GO:0021871	forebrain regionalization	7/1083	11/8043	0.000158457	0.00317753	0.00270996	DMRTA2/GSX2/WNT1/WNT2B/BMP4/LHX2/NKX2-1	7
C1	GO:0021988	olfactory lobe development	7/1083	11/8043	0.000158457	0.00317753	0.00270996	FUT1/SALL1/DLX2/GSX2/LHX2/SRF/NR2E1	7
C1	GO:0008285	negative regulation of cell population proliferation	47/1083	207/8043	0.000165896	0.00330725	0.00282059	GATA3/CEBPA/PTGIR/GATA6/FOXJ1/P3H3/DLL4/GPR3/SFRP2/SOX9/VAX1/APLN/WT1/TBX3/PDX1/TBX5/PTGES/DLL1/NTRK1/BMP4/SMAD7/ACKR3/NOG/SNAI2/SFRP1/NR2F2/SOX11/LBX1/ZBTB49/IGFBP5/RNF139/HMOX1/PTCH1/STRN/CCL2/CEND1/KIAA1024/IFI35/INHBA/TNFRSF9/ENPP7/TNFAIP3/TGFB3/LIF/SOX4/HAVCR2/NR2E1	47
C1	GO:0003279	cardiac septum development	14/1083	37/8043	0.000176565	0.00349947	0.00298453	GATA3/TBX2/GATA6/NKX2-5/RARA/TBX3/TBX5/BMP4/SMAD7/NOG/SOX11/CYR61/ISL1/HEYL	14
C1	GO:0014013	regulation of gliogenesis	11/1083	25/8043	0.000183208	0.00361016	0.00307892	DLX1/DLX2/GSX2/NKX2-2/EGR2/OLIG2/NOG/SOX11/GFAP/LIF/NR2E1	11
C1	GO:0022610	biological adhesion	91/1083	473/8043	0.000184548	0.00361565	0.00308361	KIT/TNFRSF4/GATA3/PLXNB3/FOXJ1/FUT1/CD93/SRCIN1/MXRA8/CBLN1/NRARP/THBS2/SOX9/NECTIN2/ITGB2/NR4A3/LOC100155738/ICAM4/PCDH11X/WNT1/CLDN6/CXCR3/CLDN19/DLL1/EPHA4/PCK1/CXCR4/FUT2/BMP4/RAC2/SMAD7/CRB2/ENG/JUP/CDH1/SNAI2/PODXL/GPC4/ESAM/DLG4/CYR61/CD9/PEAR1/AKNA/TNC/ANXA9/CD40LG/HAPLN2/RGMB/RHOB/PCDH7/THY1/TACSTD2/S100A9/ONECUT1/IGF2/SRF/FLOT1/IGFBP2/LOC100152566/NEDD9/ITGA5/SIRPA/KIRREL/AMIGO2/EPHB3/A…	91
C1	GO:0045893	positive regulation of transcription, DNA-templated	89/1083	461/8043	0.000191871	0.00369541	0.00315163	GATA3/SOX3/CEBPA/FOXA2/LYAR/GATA6/GATA2/FOXA1/ZIC3/TAL1/EVX1/SFRP2/FOXL2/ADCYAP1/SALL1/DLX1/HOXA11/FOXE1/SOX7/SOX9/FGF4/EGR2/SOX10/RARA/GAL/APLN/SOST/WNT1/LOC100510904/WT1/TBX3/PDX1/MYOD1/TNF/CYTL1/DLL1/BMP4/DDX3X/HNF1B/SIX1/GDF7/ARID3C/HOXA2/NOG/NR5A1/JUP/ALX1/CITED1/ID2/MLLT3/SFRP1/TNFRSF1A/NR2F2/SOX11/CYR61/NDP/AKNA/BSX/CDK12/SMYD3/ISL1/ZBTB49/PTCH1/H2AFZ/EN2/ONECUT1/LMO3/IGF2/SOX17/MLLT11/SRF…	89
C1	GO:1902680	positive regulation of RNA biosynthetic process	89/1083	461/8043	0.000191871	0.00369541	0.00315163	GATA3/SOX3/CEBPA/FOXA2/LYAR/GATA6/GATA2/FOXA1/ZIC3/TAL1/EVX1/SFRP2/FOXL2/ADCYAP1/SALL1/DLX1/HOXA11/FOXE1/SOX7/SOX9/FGF4/EGR2/SOX10/RARA/GAL/APLN/SOST/WNT1/LOC100510904/WT1/TBX3/PDX1/MYOD1/TNF/CYTL1/DLL1/BMP4/DDX3X/HNF1B/SIX1/GDF7/ARID3C/HOXA2/NOG/NR5A1/JUP/ALX1/CITED1/ID2/MLLT3/SFRP1/TNFRSF1A/NR2F2/SOX11/CYR61/NDP/AKNA/BSX/CDK12/SMYD3/ISL1/ZBTB49/PTCH1/H2AFZ/EN2/ONECUT1/LMO3/IGF2/SOX17/MLLT11/SRF…	89
C1	GO:1903508	positive regulation of nucleic acid-templated transcription	89/1083	461/8043	0.000191871	0.00369541	0.00315163	GATA3/SOX3/CEBPA/FOXA2/LYAR/GATA6/GATA2/FOXA1/ZIC3/TAL1/EVX1/SFRP2/FOXL2/ADCYAP1/SALL1/DLX1/HOXA11/FOXE1/SOX7/SOX9/FGF4/EGR2/SOX10/RARA/GAL/APLN/SOST/WNT1/LOC100510904/WT1/TBX3/PDX1/MYOD1/TNF/CYTL1/DLL1/BMP4/DDX3X/HNF1B/SIX1/GDF7/ARID3C/HOXA2/NOG/NR5A1/JUP/ALX1/CITED1/ID2/MLLT3/SFRP1/TNFRSF1A/NR2F2/SOX11/CYR61/NDP/AKNA/BSX/CDK12/SMYD3/ISL1/ZBTB49/PTCH1/H2AFZ/EN2/ONECUT1/LMO3/IGF2/SOX17/MLLT11/SRF…	89
C1	GO:0003231	cardiac ventricle development	16/1083	46/8043	0.000196236	0.00375825	0.00320523	GATA3/DLL4/SFRP2/NKX2-5/TBX3/TBX5/BMP4/SMAD7/NOG/MESP1/SOX11/CYR61/ISL1/HEYL/SOX4/NPY2R	16
C1	GO:0060284	regulation of cell development	39/1083	164/8043	0.000214425	0.00408366	0.00348275	PLXNB3/DMRTA2/DLL4/GPR3/ISLR2/DLX1/DLX2/HOXA11/GSX2/NKX2-2/EGR2/VAX1/INS/MYOD1/HES2/DLL1/SEMA6A/BMP4/OLIG2/SMAD7/NPPC/NOG/CDH1/SOX11/GDF9/LHX2/RFLNB/SHOX2/THY1/S1PR3/TACSTD2/SRF/ACTN3/GFAP/NEDD9/DMTN/LIF/PROC/NR2E1	39
C1	GO:0055007	cardiac muscle cell differentiation	13/1083	34/8043	0.000265698	0.00501154	0.00427409	RARA/TBX3/TBX5/DLL1/TBX18/BMP4/ACTC1/MESP1/ADRA1A/ISL1/TCAP/SHOX2/SRF	13
C1	GO:0097485	neuron projection guidance	19/1083	61/8043	0.000268652	0.00501154	0.00427409	PLXNB3/GBX2/EVX1/DPYSL4/EGR2/VAX1/SEMA6A/POU4F3/GDF7/HOXA2/NOG/DPYSL5/LHX2/ISL1/OTX2/NKX2-1/EPHB3/GLI2/LMX1A	19
C1	GO:0050878	regulation of body fluid levels	31/1083	122/8043	0.000271047	0.00501154	0.00427409	F7/FOXA2/AQP1/ADM/THBD/KCNN4/SCT/CHRM1/F13A1/HPS6/F8/AQP5/TMEM79/CD9/PEAR1/SERPING1/CD40LG/SLC4A1/SCNN1B/F10/SRF/CPB2/DMTN/HABP2/SYK/PLG/BPIFA1/ADM5/P2RY2/CLDN4/PROC	31
C1	GO:0001704	formation of primary germ layer	12/1083	30/8043	0.000278696	0.00501154	0.00427409	TAL1/SFRP2/HOXA11/BMP4/CRB2/NOG/MESP1/SOX17/SIX2/SRF/ITGA5/INHBA	12
C1	GO:0031016	pancreas development	12/1083	30/8043	0.000278696	0.00501154	0.00427409	FOXA2/ZIC3/SOX9/NKX2-2/NKX3-2/PDX1/DLL1/BMP4/HNF1B/PTF1A/ISL1/ONECUT1	12
C1	GO:0045666	positive regulation of neuron differentiation	12/1083	30/8043	0.000278696	0.00501154	0.00427409	FOXA1/DLX1/DLX2/NKX2-5/NKX2-2/BMP4/GDF7/SOX11/BRINP3/HEYL/GLI2/HOXD3	12
C1	GO:0048332	mesoderm morphogenesis	11/1083	26/8043	0.000279248	0.00501154	0.00427409	TAL1/SFRP2/HOXA11/TBX3/BMP4/CRB2/NOG/MESP1/SIX2/SRF/INHBA	11
C1	GO:0060389	pathway-restricted SMAD protein phosphorylation	11/1083	26/8043	0.000279248	0.00501154	0.00427409	BMP7/BMP4/SMAD7/GDF7/NOG/GDF9/BMP3/INHA/INHBA/GDF15/TGFB3	11
C1	GO:0060393	regulation of pathway-restricted SMAD protein phosphorylation	11/1083	26/8043	0.000279248	0.00501154	0.00427409	BMP7/BMP4/SMAD7/GDF7/NOG/GDF9/BMP3/INHA/INHBA/GDF15/TGFB3	11
C1	GO:0001503	ossification	33/1083	133/8043	0.000281161	0.00501154	0.00427409	CEBPA/SFRP2/SOX9/CLEC11A/EGR2/SOST/OSR2/NAB2/BMP4/SMAD7/NPPC/HOXA2/NOG/CITED1/SNAI2/SFRP1/SOX11/CYR61/BMP3/RFLNB/IGFBP5/SHOX2/PTCH1/CLEC3A/IGF2/SIX2/DHH/ACTN3/RUNX1/MMP9/TGFB3/JUNB/GLI2	33
C1	GO:0030323	respiratory tube development	20/1083	66/8043	0.000282257	0.00501154	0.00427409	CEBPA/FOXJ1/CTSZ/FOXA1/FGF9/ZIC3/ADAMTSL2/SOX9/WNT2B/CCBE1/TBX5/BMP4/NOG/SOX11/IGFBP5/SRF/NKX2-1/KLF2/LIF/GLI2	20
C1	GO:0030324	lung development	20/1083	66/8043	0.000282257	0.00501154	0.00427409	CEBPA/FOXJ1/CTSZ/FOXA1/FGF9/ZIC3/ADAMTSL2/SOX9/WNT2B/CCBE1/TBX5/BMP4/NOG/SOX11/IGFBP5/SRF/NKX2-1/KLF2/LIF/GLI2	20
C1	GO:0046661	male sex differentiation	20/1083	66/8043	0.000282257	0.00501154	0.00427409	GATA3/GATA6/LHX9/TFAP2C/SFRP2/HOXA11/SOX9/HOXA10/RARA/WT1/WNT2B/TBX3/HOXA9/NR5A1/SFRP1/SIX4/DHH/NKX2-1/INHBA/HOXD13	20
C1	GO:1905114	cell surface receptor signaling pathway involved in cell-cell signaling	37/1083	156/8043	0.000326034	0.00575881	0.0049114	GATA3/TMEM88/WNT11/PORCN/SFRP2/SALL1/CBLN1/SDC1/NRARP/SOX9/SOST/WNT1/SHISA2/WNT2B/LEF1/BMP4/NOG/MESP1/SNAI2/MLLT3/SFRP1/GPC4/NDP/ISL1/WNT4/GRB10/LGR6/STRN/WNT3A/SFRP5/SOX17/WNT10B/TCF7L2/TNFAIP3/SOX4/PROP1/GLI2	37
C1	GO:0060041	retina development in camera-type eye	14/1083	39/8043	0.000335913	0.00590271	0.00503413	DLL4/DLX1/DLX2/SOX9/LPCAT1/DLL1/PTF1A/CRB2/NDP/LHX2/PROM1/THY1/RS1/NR2E1	14
C1	GO:0060348	bone development	19/1083	62/8043	0.000339312	0.00593187	0.005059	KIT/TAL1/SFRP2/HOXA11/SOX9/FGF4/RARA/WNT1/OSR2/NAB2/BMP4/NPPC/CHAD/STC1/RFLNB/SHOX2/SRF/ACTN3/BMPR2	19
C1	GO:0010817	regulation of hormone levels	44/1083	196/8043	0.000345676	0.00601229	0.00512759	GATA3/SCGB1D1/FOXA1/SCT/PHEROC/ADCYAP1/TPO/FOXE1/INHBB/GAL/TBX3/FURIN/SSTR3/PDX1/TNF/SSTR2/GCK/HNF1B/DUOX2/CHGA/NR5A1/HSD3B1/SFRP1/HTR1A/GHRH/SOX11/DIO3/CCKAR/GDF9/TG/SULT2A1/LOC100518330/SCNN1B/INHBA/IYD/SDR16C5/TCF7L2/FFAR2/LIF/SOX4/GALR1/PCSK4/SSTR1/LRAT	44
C1	GO:1905332	positive regulation of morphogenesis of an epithelium	9/1083	19/8043	0.000365438	0.00632375	0.00539321	GATA3/SOX9/WNT2B/BMP4/SIX1/NOG/SIX4/HOXB7/LIF	9
C1	GO:0060688	regulation of morphogenesis of a branching structure	13/1083	35/8043	0.000371221	0.00639137	0.00545089	SOX9/WNT2B/BMP4/SIX1/NOG/SFRP1/SIX4/HOXB7/SHOX2/TACSTD2/SIX2/FKBPL/HOXD13	13
C1	GO:0090100	positive regulation of transmembrane receptor protein serine/threonine kinase signaling pathway	12/1083	31/8043	0.000399607	0.00684552	0.00583821	BMP7/BMP4/GDF7/CRB2/SOX11/CYR61/GDF9/BMP3/INHA/INHBA/GDF15/TGFB3	12
C1	GO:0048738	cardiac muscle tissue development	18/1083	58/8043	0.000406573	0.00686309	0.00585319	TBX2/DLL4/NKX2-5/RARA/TBX3/TBX5/DLL1/TBX18/BMP4/SMAD7/ACTC1/NOG/MESP1/ADRA1A/ISL1/TCAP/SHOX2/SRF	18
C1	GO:0060538	skeletal muscle organ development	18/1083	58/8043	0.000406573	0.00686309	0.00585319	DMRTA2/FOXL2/MSC/ACTA1/EGR2/VAX1/WT1/MYOD1/DLL1/SIX1/SOX11/SIX4/SHOX2/ACTN3/FLOT1/CHRND/HEYL/PITX1	18
C1	GO:0014031	mesenchymal cell development	10/1083	23/8043	0.000406672	0.00686309	0.00585319	GBX2/SOX9/SOX10/SEMA6A/BMP4/ALX1/SNAI2/SOX11/ISL1/HEYL	10
C1	GO:0045665	negative regulation of neuron differentiation	11/1083	27/8043	0.000414443	0.00695979	0.00593566	DLX1/DLX2/SOX9/NKX2-2/DLL1/OLIG2/HOXA2/LBX1/ISL1/LMX1A/NR2E1	11
C1	GO:0021545	cranial nerve development	8/1083	16/8043	0.000496977	0.00826437	0.00704827	EGR2/POU4F3/SIX1/SIX4/ISL1/HOXB2/HOXA3/HOXD3	8
C1	GO:0030514	negative regulation of BMP signaling pathway	8/1083	16/8043	0.000496977	0.00826437	0.00704827	SFRP2/DLX1/SOST/WNT1/SMAD7/NOG/SFRP1/CHRDL1	8
C1	GO:0007548	sex differentiation	28/1083	110/8043	0.000510998	0.00840338	0.00716683	KIT/GATA3/DMRTA2/GATA6/LHX9/TFAP2C/SFRP2/FOXL2/SALL1/HOXA11/SOX9/HOXA10/RARA/WT1/WNT2B/TBX3/HOXA9/HNF1B/NR5A1/LHX8/SFRP1/NR2F2/SIX4/GDF9/DHH/NKX2-1/INHBA/HOXD13	28
C1	GO:0008584	male gonad development	18/1083	59/8043	0.000512732	0.00840338	0.00716683	GATA3/GATA6/LHX9/TFAP2C/SFRP2/HOXA11/SOX9/HOXA10/RARA/WT1/WNT2B/HOXA9/NR5A1/SFRP1/SIX4/DHH/NKX2-1/INHBA	18
C1	GO:0046546	development of primary male sexual characteristics	18/1083	59/8043	0.000512732	0.00840338	0.00716683	GATA3/GATA6/LHX9/TFAP2C/SFRP2/HOXA11/SOX9/HOXA10/RARA/WT1/WNT2B/HOXA9/NR5A1/SFRP1/SIX4/DHH/NKX2-1/INHBA	18
C1	GO:0048589	developmental growth	42/1083	188/8043	0.000519867	0.00847956	0.0072318	TBX2/ADM/PHLDA2/ISLR2/SFRP2/HOXA11/SOX9/RARA/MYMK/WT1/MYOD1/TBX5/DLL1/SEMA6A/POU4F3/BMP4/SIX1/SMAD7/NPPC/NOG/MESP1/SFRP1/ADRA1A/GHRH/SYT17/STC1/CD9/SIX4/GDF9/LHX2/LGR6/PTCH1/SCNN1B/DUSP6/SRF/ACTN3/CHRND/KLF2/HOXD13/GDF15/LEP/GLI2	42
C1	GO:0040012	regulation of locomotion	62/1083	307/8043	0.000542993	0.00881458	0.00751752	KIT/GATA3/PLXNB3/PHLDA2/DLL4/FGF9/FUT1/SRCIN1/SFRP2/S100A14/GSX2/SOX9/FGF4/FGF21/INS/NR4A3/CD99L2/CHRM1/TMSB10/CXCR3/CCBE1/TBX5/CXCR4/SEMA6A/SPHK1/BMP4/RAC2/RARRES2/NOG/FGF5/SNAI2/SFRP1/NR2F2/STC1/CYR61/TMSB4X/LGR6/IGFBP5/TAC4/CCDC25/RHOB/THY1/VEGFD/TACSTD2/CCL2/ONECUT1/LOC100152566/NEDD9/NKX2-1/ENPP2/PHACTR1/ARRDC3/DMTN/HYAL2/ARHGDIB/TPPP2/PLET1/TNFSF14/CHRM4/CLDN4/FUZ/NR2E1	62
C1	GO:0090090	negative regulation of canonical Wnt signaling pathway	12/1083	32/8043	0.000561967	0.00907936	0.00774334	TMEM88/SFRP2/SOX9/SOST/NOG/MESP1/SNAI2/MLLT3/SFRP1/ISL1/SOX17/TCF7L2	12
C1	GO:0014032	neural crest cell development	9/1083	20/8043	0.000585616	0.00937261	0.00799344	GBX2/SOX9/SOX10/SEMA6A/BMP4/ALX1/SNAI2/SOX11/ISL1	9
C1	GO:0060350	endochondral bone morphogenesis	9/1083	20/8043	0.000585616	0.00937261	0.00799344	HOXA11/SOX9/RARA/NAB2/BMP4/NPPC/STC1/SHOX2/BMPR2	9
C1	GO:0045765	regulation of angiogenesis	25/1083	95/8043	0.000589328	0.00938794	0.00800651	AQP1/GATA6/ADM/GATA2/FUT1/SFRP2/THBS2/CCBE1/DLL1/SPHK1/PROK1/ISL1/RHOB/VEGFD/KIAA1024/MTDH/VASH2/ITGA5/ENPP2/FKBPL/KLF2/RAMP2/LEP/GPR4/NR2E1	25
C1	GO:0051145	smooth muscle cell differentiation	11/1083	28/8043	0.00060045	0.00952062	0.00811967	TMEM204/TBX2/GATA6/ADM/SOX9/TBX3/BMP4/SIX1/MESP1/SRF/RAMP2	11
C1	GO:0042733	embryonic digit morphogenesis	10/1083	24/8043	0.000613801	0.00958467	0.00817429	TBX2/SFRP2/SALL1/HOXA11/OSR2/TBX3/BMP4/NOG/HOXD13/GLI2	10
C1	GO:0007519	skeletal muscle tissue development	17/1083	55/8043	0.000615736	0.00958467	0.00817429	DMRTA2/FOXL2/MSC/ACTA1/EGR2/VAX1/MYOD1/DLL1/SIX1/SOX11/SIX4/SHOX2/ACTN3/FLOT1/CHRND/HEYL/PITX1	17
C1	GO:0045766	positive regulation of angiogenesis	17/1083	55/8043	0.000615736	0.00958467	0.00817429	AQP1/GATA6/ADM/GATA2/FUT1/SFRP2/CCBE1/DLL1/SPHK1/ISL1/RHOB/VEGFD/MTDH/VASH2/ITGA5/RAMP2/NR2E1	17
C1	GO:1904018	positive regulation of vasculature development	17/1083	55/8043	0.000615736	0.00958467	0.00817429	AQP1/GATA6/ADM/GATA2/FUT1/SFRP2/CCBE1/DLL1/SPHK1/ISL1/RHOB/VEGFD/MTDH/VASH2/ITGA5/RAMP2/NR2E1	17
C1	GO:0001649	osteoblast differentiation	18/1083	60/8043	0.000641968	0.00984197	0.00839373	CEBPA/SFRP2/SOX9/BMP4/HOXA2/NOG/CITED1/SNAI2/SFRP1/SOX11/CYR61/BMP3/IGFBP5/SHOX2/PTCH1/DHH/JUNB/GLI2	18
C1	GO:0007411	axon guidance	18/1083	60/8043	0.000641968	0.00984197	0.00839373	PLXNB3/GBX2/EVX1/EGR2/VAX1/SEMA6A/POU4F3/GDF7/HOXA2/NOG/DPYSL5/LHX2/ISL1/OTX2/NKX2-1/EPHB3/GLI2/LMX1A	18
C1	GO:0030858	positive regulation of epithelial cell differentiation	7/1083	13/8043	0.000643813	0.00984197	0.00839373	FOXJ1/SOX9/BMP4/MESP1/PTCH1/ETV4/LIF	7
C1	GO:0048333	mesodermal cell differentiation	7/1083	13/8043	0.000643813	0.00984197	0.00839373	TAL1/SFRP2/HOXA11/BMP4/MESP1/SIX2/INHBA	7
C1	GO:0003208	cardiac ventricle morphogenesis	13/1083	37/8043	0.00069114	0.0104252	0.00889115	GATA3/DLL4/SFRP2/NKX2-5/TBX5/SMAD7/NOG/MESP1/SOX11/ISL1/HEYL/SOX4/NPY2R	13
C1	GO:0010717	regulation of epithelial to mesenchymal transition	13/1083	37/8043	0.00069114	0.0104252	0.00889115	FOXA2/FOXA1/SFRP2/BMP4/SMAD7/CRB2/NOG/ALX1/SFRP1/LOC100152566/NKX2-1/TCF7L2/TGFB3	13
C1	GO:0060349	bone morphogenesis	13/1083	37/8043	0.00069114	0.0104252	0.00889115	SFRP2/HOXA11/SOX9/FGF4/RARA/OSR2/NAB2/BMP4/NPPC/STC1/SHOX2/ACTN3/BMPR2	13
C1	GO:0016055	Wnt signaling pathway	34/1083	145/8043	0.000698085	0.0104836	0.00894093	GATA3/TMEM88/WNT11/PORCN/SFRP2/SALL1/SDC1/NRARP/SOX9/SOST/WNT1/SHISA2/WNT2B/LEF1/NOG/MESP1/SNAI2/MLLT3/SFRP1/GPC4/NDP/ISL1/WNT4/GRB10/LGR6/STRN/WNT3A/SFRP5/SOX17/WNT10B/TCF7L2/TNFAIP3/SOX4/PROP1	34
C1	GO:0000122	negative regulation of transcription by RNA polymerase II	48/1083	226/8043	0.000722642	0.0108048	0.00921485	SOX3/CEBPA/LYAR/GATA6/PRDM12/FOXJ1/FOXA1/VENTX/DLL4/TAL1/DLX1/DLX2/NRARP/NKX2-5/LMO1/SOX9/AEBP1/SOX10/RARA/LOC100510904/CBX4/OSR2/PDX1/BMP4/OLIG2/SIX1/SMAD7/ID1/NOG/ALX1/ID2/NR2F2/OLIG3/SOX11/TCF23/ISL1/SHOX2/PTCH1/IGF2/SRF/VDR/IRF2BP1/NKX2-1/TCF7L2/KLF2/GLI2/NR2E1/NR4A2	48
C1	GO:0006941	striated muscle contraction	16/1083	51/8043	0.000736533	0.0109167	0.00931032	C5H12orf57/TNNT3/SCN4A/NKX2-5/CASQ1/SMAD7/ADRA1A/STC1/KCNE5/TCAP/TNNT1/ACTN3/RANGRF/PGAM2/TPM1/KCNE4	16
C1	GO:0022612	gland morphogenesis	16/1083	51/8043	0.000736533	0.0109167	0.00931032	TBX2/FOXA1/SOX9/TBX3/BMP4/GDF7/NOG/SFRP1/BSX/IGFBP5/PTCH1/HOXD13/TNFAIP3/TGFB3/PROP1/GLI2	16
C1	GO:0032835	glomerulus development	6/1083	10/8043	0.000760683	0.0111295	0.00949178	FOXJ1/WT1/BMP4/NOG/HEYL/GPR4	6
C1	GO:0035136	forelimb morphogenesis	6/1083	10/8043	0.000760683	0.0111295	0.00949178	HOXA11/OSR2/TBX3/TBX5/HOXA9/SHOX2	6
C1	GO:0048701	embryonic cranial skeleton morphogenesis	6/1083	10/8043	0.000760683	0.0111295	0.00949178	DLX2/BMP4/SIX1/HOXA2/SIX4/SIX2	6
C1	GO:0010001	glial cell differentiation	21/1083	76/8043	0.000795799	0.0114819	0.00979231	TAL1/MXRA8/DLX1/DLX2/GSX2/SOX9/NKX2-2/EGR2/SOX10/NAB2/DLL1/OLIG2/NOG/FGF5/SOX11/S100A9/GFAP/NKX2-1/LIF/SOX4/NR2E1	21
C1	GO:0007369	gastrulation	14/1083	42/8043	0.000796427	0.0114819	0.00979231	TAL1/SFRP2/HOXA11/APLN/BMP4/CRB2/NOG/MESP1/SFRP1/SOX17/SIX2/SRF/ITGA5/INHBA	14
C1	GO:0045445	myoblast differentiation	14/1083	42/8043	0.000796427	0.0114819	0.00979231	TBX2/SDC1/SOX9/TBX3/MYOD1/DLL1/BMP4/ISL1/CCL17/IGFBP3/SRF/TCF7L2/PITX1/TNFSF14	14
C1	GO:0043588	skin development	18/1083	61/8043	0.00079824	0.0114819	0.00979231	GATA6/CDSN/FOXE1/SOX9/DLL1/TMEM79/LHX2/IGFBP5/SRF/INHBA/ARRDC3/LOC106510158/KRT25/KRT36/ETV4/IVL/GLI2/CLDN4	18
C1	GO:0003197	endocardial cushion development	8/1083	17/8043	0.000828625	0.0118192	0.01008	TBX2/SOX9/TBX3/TBX5/BMP4/NOG/ISL1/HEYL	8
C1	GO:0045682	regulation of epidermis development	8/1083	17/8043	0.000828625	0.0118192	0.01008	NAB2/DLL1/BMP4/TMEM79/PTCH1/MYCL/KRT36/ETV4	8
C1	GO:0090288	negative regulation of cellular response to growth factor stimulus	11/1083	29/8043	0.000851095	0.0120891	0.0103102	GATA3/SFRP2/DLX1/APLN/SOST/WNT1/SHISA2/SMAD7/NOG/SFRP1/CHRDL1	11
C1	GO:0051254	positive regulation of RNA metabolic process	90/1083	488/8043	0.000860029	0.0121653	0.0103752	GATA3/SOX3/CEBPA/FOXA2/LYAR/GATA6/GATA2/FOXA1/ZIC3/TAL1/EVX1/SFRP2/FOXL2/ADCYAP1/SALL1/DLX1/HOXA11/FOXE1/SOX7/SOX9/FGF4/EGR2/SOX10/RARA/GAL/APLN/SOST/WNT1/LOC100510904/WT1/TBX3/PDX1/MYOD1/TNF/CYTL1/DLL1/BMP4/DDX3X/HNF1B/SIX1/NANOS2/GDF7/ARID3C/HOXA2/NOG/NR5A1/JUP/ALX1/CITED1/ID2/MLLT3/SFRP1/TNFRSF1A/NR2F2/SOX11/CYR61/NDP/AKNA/BSX/CDK12/SMYD3/ISL1/ZBTB49/PTCH1/H2AFZ/EN2/ONECUT1/LMO3/IGF2/SOX17/MLL…	90
C1	GO:0001707	mesoderm formation	10/1083	25/8043	0.000900862	0.0123195	0.0105067	TAL1/SFRP2/HOXA11/BMP4/CRB2/NOG/MESP1/SIX2/SRF/INHBA	10
C1	GO:0001843	neural tube closure	10/1083	25/8043	0.000900862	0.0123195	0.0105067	ADM/SFRP2/RARA/BMP4/NOG/SFRP1/LHX2/PTCH1/RGMA/FUZ	10
C1	GO:0055006	cardiac cell development	10/1083	25/8043	0.000900862	0.0123195	0.0105067	TBX3/TBX5/TBX18/BMP4/ACTC1/ADRA1A/ISL1/TCAP/SHOX2/SRF	10
C1	GO:0055013	cardiac muscle cell development	10/1083	25/8043	0.000900862	0.0123195	0.0105067	TBX3/TBX5/TBX18/BMP4/ACTC1/ADRA1A/ISL1/TCAP/SHOX2/SRF	10
C1	GO:0060425	lung morphogenesis	10/1083	25/8043	0.000900862	0.0123195	0.0105067	CTSZ/FOXA1/SOX9/WNT2B/BMP4/NOG/SOX11/SRF/NKX2-1/LIF	10
C1	GO:0060606	tube closure	10/1083	25/8043	0.000900862	0.0123195	0.0105067	ADM/SFRP2/RARA/BMP4/NOG/SFRP1/LHX2/PTCH1/RGMA/FUZ	10
C1	GO:0010862	positive regulation of pathway-restricted SMAD protein phosphorylation	9/1083	21/8043	0.000903457	0.0123195	0.0105067	BMP7/BMP4/GDF7/GDF9/BMP3/INHA/INHBA/GDF15/TGFB3	9
C1	GO:0048864	stem cell development	9/1083	21/8043	0.000903457	0.0123195	0.0105067	GBX2/SOX9/SOX10/SEMA6A/BMP4/ALX1/SNAI2/SOX11/ISL1	9
C1	GO:2000177	regulation of neural precursor cell proliferation	9/1083	21/8043	0.000903457	0.0123195	0.0105067	DMRTA2/DLL4/VAX1/ID2/LHX2/CEND1/SMARCA1/GLI2/NR2E1	9
C1	GO:0043269	regulation of ion transport	74/1083	388/8043	0.000948396	0.0128808	0.0109854	FGF11/KCNN4/SCT/APOA1/ADCYAP1/FGF19/SCN4A/KCND3/INHBB/HRC/CACNG4/FGF21/INS/NR4A3/CASQ1/GAL/FURIN/GRIN3B/SSTR3/PDX1/GRASP/TNF/PTGES/SSTR2/BMP4/GCK/GP91-PHOX/CHGA/KCNG1/FXYD3/KCNC3/LIPG/KCNAB2/SFRP1/GHRH/SYT17/STC1/TMSB4X/GDF9/KCNJ9/KCNE5/GRB10/PTCH1/KCNA5/KCNJ4/THY1/CCL2/C3/AVPR1B/NFKBIA/HPCA/CLIC5/DMTN/TCF7L2/SYK/RANGRF/FFAR2/CRACR2B/KCNE4/DRD2/SYT13/LEP/HYAL2/BPIFA1/KCND1/TGFB3/SOX4/GALR1/APOA5/…	74
C1	GO:1901342	regulation of vasculature development	25/1083	98/8043	0.000965539	0.0130525	0.0111318	AQP1/GATA6/ADM/GATA2/FUT1/SFRP2/THBS2/CCBE1/DLL1/SPHK1/PROK1/ISL1/RHOB/VEGFD/KIAA1024/MTDH/VASH2/ITGA5/ENPP2/FKBPL/KLF2/RAMP2/LEP/GPR4/NR2E1	25
C1	GO:0060047	heart contraction	17/1083	57/8043	0.000968696	0.0130525	0.0111318	ADM/KCND3/NKX2-5/HRC/TBX18/SMAD7/ACTC1/ADRA1A/STC1/KCNE5/ISL1/TCAP/SHOX2/RANGRF/TPM1/KCNE4/ADM5	17
C1	GO:0030334	regulation of cell migration	54/1083	265/8043	0.000977376	0.0131176	0.0111874	KIT/GATA3/PLXNB3/PHLDA2/DLL4/FGF9/FUT1/SRCIN1/SFRP2/S100A14/GSX2/SOX9/FGF4/FGF21/INS/NR4A3/CD99L2/TMSB10/CXCR3/CCBE1/TBX5/SEMA6A/SPHK1/BMP4/RAC2/NOG/FGF5/SNAI2/SFRP1/NR2F2/STC1/CYR61/TMSB4X/LGR6/IGFBP5/RHOB/THY1/VEGFD/TACSTD2/CCL2/ONECUT1/LOC100152566/NEDD9/NKX2-1/ENPP2/PHACTR1/DMTN/HYAL2/ARHGDIB/PLET1/TNFSF14/CLDN4/FUZ/NR2E1	54
C1	GO:0008406	gonad development	24/1083	93/8043	0.00101622	0.0135324	0.0115411	KIT/GATA3/GATA6/LHX9/TFAP2C/SFRP2/FOXL2/SALL1/HOXA11/SOX9/HOXA10/RARA/WT1/WNT2B/HOXA9/NR5A1/LHX8/SFRP1/NR2F2/SIX4/GDF9/DHH/NKX2-1/INHBA	24
C1	GO:0045137	development of primary sexual characteristics	24/1083	93/8043	0.00101622	0.0135324	0.0115411	KIT/GATA3/GATA6/LHX9/TFAP2C/SFRP2/FOXL2/SALL1/HOXA11/SOX9/HOXA10/RARA/WT1/WNT2B/HOXA9/NR5A1/LHX8/SFRP1/NR2F2/SIX4/GDF9/DHH/NKX2-1/INHBA	24
C1	GO:0048593	camera-type eye morphogenesis	12/1083	34/8043	0.0010548	0.0139916	0.0119327	TBX2/C5H12orf57/SOX9/DLL1/BMP4/PTF1A/CRB2/AQP5/SOX11/PROM1/THY1/RS1	12
C1	GO:0051270	regulation of cellular component movement	60/1083	303/8043	0.00110773	0.0146366	0.0124828	KIT/GATA3/PLXNB3/PHLDA2/DLL4/FGF9/FUT1/SRCIN1/SFRP2/S100A14/GSX2/SOX9/FGF4/FGF21/INS/NR4A3/CD99L2/TMSB10/CXCR3/CCBE1/TBX5/SEMA6A/SPHK1/BMP4/RAC2/NOG/FGF5/SNAI2/SFRP1/NR2F2/STC1/CYR61/CD9/TMSB4X/LGR6/IGFBP5/TAC4/CCDC25/RHOB/THY1/VEGFD/TACSTD2/CCL2/ONECUT1/LOC100152566/NEDD9/NKX2-1/ENPP2/PHACTR1/DMTN/RANGRF/HYAL2/TGFBR3/ARHGDIB/TPPP2/PLET1/TNFSF14/CLDN4/FUZ/NR2E1	60
C1	GO:0021532	neural tube patterning	7/1083	14/8043	0.00113869	0.0149876	0.0127822	FOXA1/GBX2/WNT1/BMP4/PTCH1/SOX17/GLI2	7
C1	GO:0061564	axon development	31/1083	132/8043	0.00114764	0.0150473	0.0128331	PLXNB3/GBX2/ISLR2/EVX1/C5H12orf57/EGR2/VAX1/NTRK1/SEMA6A/POU4F3/GDF7/HOXA2/NOG/DPYSL5/CCKAR/CNR1/LHX2/ISL1/SHOX2/OTX2/THY1/SRF/FLOT1/VASH2/NKX2-1/EPHB3/RGMA/GLI2/LMX1A/NR2E1/NR4A2	31
C1	GO:0045944	positive regulation of transcription by RNA polymerase II	67/1083	347/8043	0.00117166	0.0152023	0.0129653	GATA3/SOX3/FOXA2/GATA6/GATA2/FOXA1/ZIC3/TAL1/EVX1/SFRP2/FOXL2/ADCYAP1/SALL1/DLX1/SOX9/FGF4/EGR2/RARA/GAL/APLN/WNT1/TBX3/PDX1/MYOD1/TNF/CYTL1/DLL1/BMP4/SIX1/ARID3C/HOXA2/NOG/NR5A1/JUP/ALX1/CITED1/TNFRSF1A/NR2F2/SOX11/CYR61/AKNA/BSX/CDK12/SMYD3/ISL1/ZBTB49/H2AFZ/EN2/ONECUT1/LMO3/IGF2/SOX17/SRF/VDR/NFKBIA/TFAP2D/NKX2-1/INHBA/TCF7L2/KLF2/PPARGC1A/HYAL2/LIF/SOX4/SESN2/GALR1/NR3C1	67
C1	GO:0040007	growth	54/1083	267/8043	0.00117166	0.0152023	0.0129653	TBX2/ADM/PHLDA2/ISLR2/SFRP2/HOXA11/SOX9/CCDC85B/RARA/MYMK/WT1/MYOD1/TBX5/MT-2B/DLL1/SEMA6A/POU4F3/SPHK1/BMP4/SIX1/SMAD7/NPPC/NOG/NUBP1/MESP1/SFRP1/ADRA1A/GHRH/SYT17/STC1/CD9/SIX4/GDF9/LHX2/LGR6/IGFBP5/PTCH1/SCNN1B/DUSP6/SOX17/KIAA1024/SRF/ACTN3/IGFBP2/CHRND/INHBA/KLF2/HOXD13/GDF15/LEP/HYAL2/SESN2/GLI2/LMX1A	54
C1	GO:0055002	striated muscle cell development	16/1083	53/8043	0.00117284	0.0152023	0.0129653	TNNT3/SDC1/ACTA1/CASQ1/MYOD1/BMP4/SIX1/ACTC1/SIX4/TCAP/SHOX2/TNNT1/SRF/FLNC/ACTN3/LMOD2	16
C1	GO:0003015	heart process	18/1083	63/8043	0.00121013	0.0156263	0.0133269	ADM/KCND3/NKX2-5/HRC/TBX18/SMAD7/ACTC1/CHGA/ADRA1A/STC1/KCNE5/ISL1/TCAP/SHOX2/RANGRF/TPM1/KCNE4/ADM5	18
C1	GO:0007409	axonogenesis	28/1083	116/8043	0.00125239	0.016111	0.0137402	PLXNB3/GBX2/ISLR2/EVX1/C5H12orf57/EGR2/VAX1/NTRK1/SEMA6A/POU4F3/GDF7/HOXA2/NOG/DPYSL5/CCKAR/LHX2/ISL1/SHOX2/OTX2/THY1/SRF/FLOT1/NKX2-1/EPHB3/GLI2/LMX1A/NR2E1/NR4A2	28
C1	GO:0003014	renal system process	10/1083	26/8043	0.00128937	0.016401	0.0139876	AQP1/ADM/SLC22A6/BMP4/BDKRB1/STC1/SLC4A1/ADM5/PGR/CLDN4	10
C1	GO:0014020	primary neural tube formation	10/1083	26/8043	0.00128937	0.016401	0.0139876	ADM/SFRP2/RARA/BMP4/NOG/SFRP1/LHX2/PTCH1/RGMA/FUZ	10
C1	GO:0060021	roof of mouth development	10/1083	26/8043	0.00128937	0.016401	0.0139876	TBX2/MSC/FOXE1/VAX1/OSR2/TBX3/SOX11/INHBA/EPHB3/TGFB3	10
C1	GO:0198738	cell-cell signaling by wnt	34/1083	150/8043	0.00131348	0.0165659	0.0141282	GATA3/TMEM88/WNT11/PORCN/SFRP2/SALL1/SDC1/NRARP/SOX9/SOST/WNT1/SHISA2/WNT2B/LEF1/NOG/MESP1/SNAI2/MLLT3/SFRP1/GPC4/NDP/ISL1/WNT4/GRB10/LGR6/STRN/WNT3A/SFRP5/SOX17/WNT10B/TCF7L2/TNFAIP3/SOX4/PROP1	34
C1	GO:0050879	multicellular organismal movement	8/1083	18/8043	0.00131691	0.0165659	0.0141282	C5H12orf57/TNNT3/SCN4A/CASQ1/TCAP/TNNT1/ACTN3/CHRND	8
C1	GO:0050881	musculoskeletal movement	8/1083	18/8043	0.00131691	0.0165659	0.0141282	C5H12orf57/TNNT3/SCN4A/CASQ1/TCAP/TNNT1/ACTN3/CHRND	8
C1	GO:0072089	stem cell proliferation	9/1083	22/8043	0.00134815	0.0168965	0.0144102	SFRP2/WNT1/WNT2B/TBX3/SOX11/ETV6/SOX17/SIX2/NR2E1	9
C1	GO:0007498	mesoderm development	12/1083	35/8043	0.00141146	0.0176251	0.0150316	TAL1/SFRP2/HOXA11/TBX3/BMP4/CRB2/NOG/MESP1/LHX2/SIX2/SRF/INHBA	12
C1	GO:0048839	inner ear development	17/1083	59/8043	0.00148067	0.0183216	0.0156256	OTX1/CEBPA/GBX2/FOXI1/HMX3/SOX9/WNT1/CYTL1/DLL1/POU4F3/BMP4/SIX1/SIX4/USH1G/MYCL/LHFPL5/GLI2	17
C1	GO:0042474	middle ear morphogenesis	6/1083	11/8043	0.00148335	0.0183216	0.0156256	NKX3-2/OSR2/SIX1/HOXA2/NOG/SIX2	6
C1	GO:0051004	regulation of lipoprotein lipase activity	6/1083	11/8043	0.00148335	0.0183216	0.0156256	GPIHBP1/INS/APOC3/ANGPTL4/APOC2/APOA5	6
C1	GO:0002065	columnar/cuboidal epithelial cell differentiation	13/1083	40/8043	0.00158378	0.0194212	0.0165634	GATA6/FOXA1/NKX6-3/NKX2-2/NKX3-2/RARA/PDX1/DLL1/BMP4/DSP/SOX11/SOX4/IL31	13
C1	GO:0045667	regulation of osteoblast differentiation	13/1083	40/8043	0.00158378	0.0194212	0.0165634	CEBPA/SFRP2/SOX9/BMP4/HOXA2/NOG/CITED1/SNAI2/SFRP1/SOX11/CYR61/IGFBP5/PTCH1	13
C1	GO:2000145	regulation of cell motility	57/1083	289/8043	0.00160827	0.0196509	0.0167593	KIT/GATA3/PLXNB3/PHLDA2/DLL4/FGF9/FUT1/SRCIN1/SFRP2/S100A14/GSX2/SOX9/FGF4/FGF21/INS/NR4A3/CD99L2/TMSB10/CXCR3/CCBE1/TBX5/SEMA6A/SPHK1/BMP4/RAC2/NOG/FGF5/SNAI2/SFRP1/NR2F2/STC1/CYR61/TMSB4X/LGR6/IGFBP5/TAC4/CCDC25/RHOB/THY1/VEGFD/TACSTD2/CCL2/ONECUT1/LOC100152566/NEDD9/NKX2-1/ENPP2/PHACTR1/DMTN/HYAL2/ARHGDIB/TPPP2/PLET1/TNFSF14/CLDN4/FUZ/NR2E1	57
C1	GO:0006936	muscle contraction	26/1083	107/8043	0.00166155	0.0202293	0.0172526	TBX2/C5H12orf57/TNNT3/SCN4A/NKX2-5/CASQ1/TBX3/SPHK1/SMAD7/ADRA1A/BDKRB1/STC1/KCNE5/TCAP/SCNN1B/TNNT1/SRF/EDN1/ACTN3/RANGRF/PGAM2/TPM1/KCNE4/PGR/LMOD2/EDN3	26
C1	GO:0034101	erythrocyte homeostasis	14/1083	45/8043	0.00170296	0.0206598	0.0176197	KIT/LYAR/TAL1/BMP4/HOXB6/HMOX1/SLC4A1/SCNN1B/SRF/CEBPG/INHBA/DMTN/KLF2/KLF1	14
C1	GO:0032990	cell part morphogenesis	37/1083	170/8043	0.00179496	0.0215033	0.0183391	PLXNB3/GBX2/ISLR2/EVX1/SRCIN1/C5H12orf57/DPYSL4/EGR2/VAX1/NTRK1/SEMA6A/POU4F3/GDF7/HOXA2/NOG/DPYSL5/SYT17/CCKAR/LHX2/ISL1/NTF4/SHOX2/OTX2/THY1/SRF/FLOT1/NKX2-1/NYAP1/ENPP2/PHACTR1/EPHB3/MTM1/NTF3/GLI2/LMX1A/NR2E1/NR4A2	37
C1	GO:0003281	ventricular septum development	10/1083	27/8043	0.00180403	0.0215033	0.0183391	GATA3/NKX2-5/TBX3/TBX5/BMP4/SMAD7/NOG/SOX11/CYR61/HEYL	10
C1	GO:0014033	neural crest cell differentiation	10/1083	27/8043	0.00180403	0.0215033	0.0183391	GBX2/SOX9/SOX10/SEMA6A/BMP4/ALX1/SNAI2/SFRP1/SOX11/ISL1	10
C1	GO:0048659	smooth muscle cell proliferation	10/1083	27/8043	0.00180403	0.0215033	0.0183391	PTGIR/NR4A3/APLN/BMP4/ID2/IGFBP5/HMOX1/TCF7L2/TNFAIP3/TGFB3	10
C1	GO:0048660	regulation of smooth muscle cell proliferation	10/1083	27/8043	0.00180403	0.0215033	0.0183391	PTGIR/NR4A3/APLN/BMP4/ID2/IGFBP5/HMOX1/TCF7L2/TNFAIP3/TGFB3	10
C1	GO:0001892	embryonic placenta development	12/1083	36/8043	0.00186201	0.021964	0.018732	CEBPA/PLCD3/ADM/PHLDA2/MDFI/CITED1/CYR61/IGF2/GRB2/VASH2/LIF/JUNB	12
C1	GO:0042472	inner ear morphogenesis	12/1083	36/8043	0.00186201	0.021964	0.018732	OTX1/GBX2/FOXI1/HMX3/SOX9/WNT1/POU4F3/SIX1/SIX4/USH1G/LHFPL5/GLI2	12
C1	GO:0060395	SMAD protein signal transduction	12/1083	36/8043	0.00186201	0.021964	0.018732	BMP7/BMP4/SMAD7/GDF7/CITED1/GDF9/BMP3/INHA/INHBA/SMAD9/GDF15/TGFB3	12
C1	GO:0003009	skeletal muscle contraction	7/1083	15/8043	0.00188866	0.0219742	0.0187407	C5H12orf57/TNNT3/SCN4A/CASQ1/TCAP/TNNT1/ACTN3	7
C1	GO:0003338	metanephros morphogenesis	7/1083	15/8043	0.00188866	0.0219742	0.0187407	FOXJ1/SALL1/SOX9/WT1/BMP4/SIX2/LIF	7
C1	GO:0021879	forebrain neuron differentiation	7/1083	15/8043	0.00188866	0.0219742	0.0187407	GBX2/DLX1/DLX2/GSX2/LHX8/NKX2-1/INHBA	7
C1	GO:0032941	secretion by tissue	7/1083	15/8043	0.00188866	0.0219742	0.0187407	AQP1/KCNN4/SCT/CHRM1/AQP5/SCNN1B/P2RY2	7
C1	GO:0030901	midbrain development	9/1083	23/8043	0.00195339	0.02265	0.0193171	OTX1/SFRP2/WNT1/BARHL1/GDF7/SFRP1/EN2/TFAP2D/LMX1A	9
C1	GO:0003209	cardiac atrium morphogenesis	8/1083	19/8043	0.00200889	0.0229809	0.0195993	DLL4/NKX2-5/TBX5/NOG/MESP1/CYR61/ISL1/SHOX2	8
C1	GO:0007492	endoderm development	8/1083	19/8043	0.00200889	0.0229809	0.0195993	BMP4/NOG/MESP1/ONECUT1/SOX17/ITGA5/NKX2-1/INHBA	8
C1	GO:0021872	forebrain generation of neurons	8/1083	19/8043	0.00200889	0.0229809	0.0195993	GBX2/DLX1/DLX2/GSX2/LHX8/NKX2-1/INHBA/NR2E1	8
C1	GO:0110110	positive regulation of animal organ morphogenesis	8/1083	19/8043	0.00200889	0.0229809	0.0195993	GATA3/HOXA11/SOX9/WNT2B/BMP4/SIX1/MESP1/SIX4	8
C1	GO:0044344	cellular response to fibroblast growth factor stimulus	13/1083	41/8043	0.00203834	0.0231623	0.019754	GATA3/DLL4/FGF9/FGF19/FGF4/FGF21/APLN/SHISA2/NOG/FGF5/SFRP1/CCL2/HYAL2	13
C1	GO:0071774	response to fibroblast growth factor	13/1083	41/8043	0.00203834	0.0231623	0.019754	GATA3/DLL4/FGF9/FGF19/FGF4/FGF21/APLN/SHISA2/NOG/FGF5/SFRP1/CCL2/HYAL2	13
C1	GO:0045926	negative regulation of growth	18/1083	66/8043	0.00215836	0.0243428	0.0207607	SFRP2/CCDC85B/WT1/TBX5/MT-2B/SEMA6A/BMP4/NOG/SFRP1/GDF9/IGFBP5/PTCH1/SOX17/KIAA1024/INHBA/GDF15/HYAL2/SESN2	18
C1	GO:0003012	muscle system process	31/1083	137/8043	0.00216319	0.0243428	0.0207607	TBX2/C5H12orf57/TNNT3/SCN4A/NKX2-5/HRC/CASQ1/MYMK/TBX3/NPPA/SPHK1/SMAD7/CHGA/ADRA1A/BDKRB1/STC1/KCNE5/TCAP/IGFBP5/SCNN1B/TNNT1/SRF/EDN1/ACTN3/RANGRF/PGAM2/TPM1/KCNE4/PGR/LMOD2/EDN3	31
C1	GO:0021761	limbic system development	11/1083	32/8043	0.00216364	0.0243428	0.0207607	SCT/DLX1/DLX2/TBX3/HSD3B1/SRF/NKX2-1/BCAN/PROP1/LMX1A/NR2E1	11
C1	GO:0071495	cellular response to endogenous stimulus	75/1083	406/8043	0.00218242	0.0244733	0.0208721	TNFRSF4/GATA3/MZB1/AQP1/FOXA1/DLL4/FGF9/SFRP2/ADAMTSL2/DLX1/SLC2A4/FGF19/SOX9/INHBB/FGF4/FGF21/INS/NR4A3/LHB/APLN/SOST/WNT1/SHISA2/WT1/BMP7/PMEPA1/PCK1/NTRK1/SSTR2/BMP4/SMAD7/GDF7/CRB2/NOG/NR5A1/ENG/CITED1/FGF5/SNAI2/SFRP1/SOX11/CYR61/IRS1/GDF9/SMYD3/GRB10/IGFBP5/NTF4/RGMB/CCL2/ONECUT1/SCNN1B/SFRP5/IGF2/GRB2/CHRDL1/LOC100152566/NKX2-1/BMPR2/DMTN/RAMP2/SMAD9/GDF15/DRD2/HEYL/LEP/RGMA/HYAL2/TGFBR3/T…	75
C1	GO:0003006	developmental process involved in reproduction	69/1083	368/8043	0.00220015	0.0245912	0.0209726	KIT/GATA3/SOX3/CEBPA/DMRTA2/GATA6/PLCD3/ADM/LHX9/PHLDA2/FOXA1/TFAP2C/GPR3/SFRP2/FOXL2/SALL1/HOXA11/SOX9/NECTIN2/HOXA10/MDFI/RARA/CATSPERZ/WT1/WNT2B/TBX3/HOXA9/BMP4/CELF3/HNF1B/NANOS2/GDF7/NPPC/NOG/NR5A1/LHX8/CITED1/CDH1/SFRP1/NR2F2/CYR61/SIX4/NDP/TCF23/SPATA20/GDF9/ELSPBP1/EPOR/GTSF1/IGF2/GRB2/SOX17/DHH/VASH2/NKX2-1/INHBA/SERPINA5/SEBOX/HOXD13/ADIG/LIF/JUNB/FSCN3/GALNTL5/CDC25B/GLI2/PCSK4/TSSK1B/…	69
C1	GO:0043524	negative regulation of neuron apoptotic process	15/1083	51/8043	0.00220873	0.0246064	0.0209856	DLX1/BARHL1/NTRK1/SIX1/CITED1/SIX4/ISL1/NTF4/EN2/CCL2/TFAP2D/MAP3K12/PPARGC1A/NTF3/NR4A2	15
C1	GO:0007169	transmembrane receptor protein tyrosine kinase signaling pathway	44/1083	214/8043	0.00232029	0.025765	0.0219737	KIT/TMEM204/GATA3/MZB1/PTGIR/FGF9/FGF19/SOX9/FGF4/FGF21/INS/NR4A3/APLN/WNT1/SHISA2/SLA/CCBE1/DLL1/NTRK1/NOG/FGF5/EFNB2/EFNA2/IGFBP4/IRS1/GRB10/IGFBP5/NTF4/VEGFD/PLAT/RNF115/IGFBP3/IGF2/GRB2/IGFBP2/NEDD9/HIP1R/EGFR/EPHB3/GDF15/EGF/LEP/EFS/NTF3	44
C1	GO:0090101	negative regulation of transmembrane receptor protein serine/threonine kinase signaling pathway	12/1083	37/8043	0.00242403	0.0268296	0.0228817	SFRP2/ADAMTSL2/DLX1/SOST/WNT1/PMEPA1/SMAD7/NOG/SFRP1/ONECUT1/CHRDL1/NKX2-1	12
C1	GO:0008015	blood circulation	36/1083	167/8043	0.00244504	0.0269746	0.0230053	ADM/AVPR2/DRD1/DBH/NOS3/KCND3/NKX2-5/HRC/DLL1/TBX18/NPPA/SMAD7/ACTC1/GLP1R/ID2/HTR1A/ADRA1A/STC1/AVP/KCNE5/ISL1/TCAP/SHOX2/SCNN1B/EDN1/AVPR1B/KLF2/RANGRF/RAMP2/TPM1/KCNE4/ADM5/GPR4/P2RY2/EDN3/ANPEP	36
C1	GO:0021543	pallium development	13/1083	42/8043	0.00259505	0.0285372	0.024338	DMRTA2/SCT/DLX1/DLX2/HSD3B1/LHX2/MDGA1/SRF/NKX2-1/PHACTR1/BCAN/LMX1A/NR2E1	13
C1	GO:0061323	cell proliferation involved in heart morphogenesis	6/1083	12/8043	0.0026306	0.0287426	0.0245132	SOX9/TBX3/TBX5/BMP4/SIX1/ISL1	6
C1	GO:2000136	regulation of cell proliferation involved in heart morphogenesis	6/1083	12/8043	0.0026306	0.0287426	0.0245132	SOX9/TBX3/TBX5/BMP4/SIX1/ISL1	6
C1	GO:0030178	negative regulation of Wnt signaling pathway	14/1083	47/8043	0.00269082	0.0293068	0.0249943	TMEM88/SFRP2/SOX9/SOST/SHISA2/NOG/MESP1/SNAI2/MLLT3/SFRP1/ISL1/GRB10/SOX17/TCF7L2	14
C1	GO:1901215	negative regulation of neuron death	16/1083	57/8043	0.00271316	0.0293132	0.0249997	DLX1/WNT1/BARHL1/NTRK1/SIX1/CITED1/SIX4/ISL1/NTF4/EN2/CCL2/TFAP2D/MAP3K12/PPARGC1A/NTF3/NR4A2	16
C1	GO:0048858	cell projection morphogenesis	36/1083	168/8043	0.0027202	0.0293132	0.0249997	PLXNB3/GBX2/ISLR2/EVX1/SRCIN1/C5H12orf57/DPYSL4/EGR2/VAX1/NTRK1/SEMA6A/POU4F3/GDF7/HOXA2/NOG/DPYSL5/SYT17/CCKAR/LHX2/ISL1/NTF4/SHOX2/OTX2/THY1/SRF/FLOT1/NKX2-1/NYAP1/ENPP2/PHACTR1/EPHB3/NTF3/GLI2/LMX1A/NR2E1/NR4A2	36
C1	GO:0120039	plasma membrane bounded cell projection morphogenesis	36/1083	168/8043	0.0027202	0.0293132	0.0249997	PLXNB3/GBX2/ISLR2/EVX1/SRCIN1/C5H12orf57/DPYSL4/EGR2/VAX1/NTRK1/SEMA6A/POU4F3/GDF7/HOXA2/NOG/DPYSL5/SYT17/CCKAR/LHX2/ISL1/NTF4/SHOX2/OTX2/THY1/SRF/FLOT1/NKX2-1/NYAP1/ENPP2/PHACTR1/EPHB3/NTF3/GLI2/LMX1A/NR2E1/NR4A2	36
C1	GO:0014902	myotube differentiation	15/1083	52/8043	0.0027258	0.0293132	0.0249997	EHD2/NKX2-5/ACTA1/MYMK/WNT1/MYOD1/SIX1/CD9/SIX4/SMYD3/SHOX2/ACTN3/FLOT1/GDF15/TNFSF14	15
C1	GO:0003407	neural retina development	9/1083	24/8043	0.00275714	0.0293722	0.0250501	DLL4/DLX1/DLX2/SOX9/PTF1A/CRB2/PROM1/THY1/RS1	9
C1	GO:0048708	astrocyte differentiation	9/1083	24/8043	0.00275714	0.0293722	0.0250501	TAL1/SOX9/NKX2-2/DLL1/NOG/S100A9/GFAP/LIF/NR2E1	9
C1	GO:0072132	mesenchyme morphogenesis	9/1083	24/8043	0.00275714	0.0293722	0.0250501	TBX2/SOX9/ACTA1/TBX3/ACTC1/NOG/ISL1/ACTA2/HEYL	9
C1	GO:1903522	regulation of blood circulation	20/1083	78/8043	0.00281052	0.0298475	0.0254555	ADM/AVPR2/DBH/KCND3/NKX2-5/HRC/TBX18/SMAD7/HTR1A/ADRA1A/STC1/KCNE5/ISL1/SHOX2/EDN1/AVPR1B/RANGRF/KCNE4/ADM5/EDN3	20
C1	GO:0009719	response to endogenous stimulus	84/1083	468/8043	0.00284829	0.0301548	0.0257175	TNFRSF4/GATA3/MZB1/AQP1/FOXA1/DLL4/FGF9/SFRP2/NOS3/ADAMTSL2/DLX1/SLC2A4/FGF19/SOX9/INHBB/FGF4/FGF21/INS/ITGB2/NR4A3/LHB/APLN/SOST/WNT1/SHISA2/WT1/BMP7/PMEPA1/PCK1/NTRK1/SSTR2/BMP4/SMAD7/GDF7/CRB2/NOG/NR5A1/ENG/CITED1/FGF5/SNAI2/HSD3B1/SFRP1/TIMP1/SOX11/CYR61/CD9/IRS1/GDF9/SMYD3/GRB10/IGFBP5/NTF4/RGMB/CCL2/ONECUT1/SCNN1B/SFRP5/IGFBP3/IGF2/GRB2/SRF/CHRDL1/IGFBP2/LOC100152566/NKX2-1/BMPR2/DMTN/SYK/R…	84
C1	GO:0001947	heart looping	8/1083	20/8043	0.00295774	0.0310244	0.0264592	TBX2/ZIC3/TBX3/DLL1/MESP1/LBX1/SOX17/SRF	8
C1	GO:0003230	cardiac atrium development	8/1083	20/8043	0.00295774	0.0310244	0.0264592	DLL4/NKX2-5/TBX5/NOG/MESP1/CYR61/ISL1/SHOX2	8
C1	GO:0031128	developmental induction	8/1083	20/8043	0.00295774	0.0310244	0.0264592	HOXA11/SOX9/WNT1/WNT2B/BMP4/SIX1/MESP1/NKX2-1	8
C1	GO:0048812	neuron projection morphogenesis	35/1083	163/8043	0.00298517	0.0312161	0.0266227	PLXNB3/GBX2/ISLR2/EVX1/SRCIN1/C5H12orf57/DPYSL4/EGR2/VAX1/NTRK1/SEMA6A/POU4F3/GDF7/HOXA2/NOG/DPYSL5/SYT17/CCKAR/LHX2/ISL1/NTF4/SHOX2/OTX2/THY1/SRF/FLOT1/NKX2-1/NYAP1/PHACTR1/EPHB3/NTF3/GLI2/LMX1A/NR2E1/NR4A2	35
C1	GO:0061351	neural precursor cell proliferation	12/1083	38/8043	0.00311684	0.0324933	0.0277119	DMRTA2/DLL4/GBX2/VAX1/WNT1/ID2/AKNA/LHX2/CEND1/SMARCA1/GLI2/NR2E1	12
C1	GO:0042063	gliogenesis	23/1083	95/8043	0.00315311	0.0327287	0.0279127	TAL1/MXRA8/DLX1/DLX2/GSX2/SOX9/NKX2-2/EGR2/SOX10/NAB2/DLL1/OLIG2/NOG/FGF5/SOX11/CCL2/S100A9/GFAP/NKX2-1/AZU1/LIF/SOX4/NR2E1	23
C1	GO:0051960	regulation of nervous system development	28/1083	123/8043	0.00315863	0.0327287	0.0279127	PLXNB3/DMRTA2/DLL4/GBX2/ISLR2/CBLN1/DLX1/DLX2/GSX2/NKX2-2/EGR2/VAX1/HES2/DLL1/NTRK1/SEMA6A/OLIG2/NOG/LRRC24/SOX11/LHX2/SHOX2/THY1/SRF/GFAP/EPHB3/LIF/NR2E1	28
C1	GO:0048592	eye morphogenesis	13/1083	43/8043	0.00327023	0.0337824	0.0288114	TBX2/FOXL2/C5H12orf57/SOX9/DLL1/BMP4/PTF1A/CRB2/AQP5/SOX11/PROM1/THY1/RS1	13
C1	GO:0010721	negative regulation of cell development	16/1083	58/8043	0.00328892	0.0338729	0.0288886	GPR3/DLX1/DLX2/VAX1/SEMA6A/NPPC/NOG/CDH1/SOX11/LHX2/RFLNB/THY1/S1PR3/TACSTD2/DMTN/NR2E1	16
C1	GO:0009799	specification of symmetry	11/1083	34/8043	0.00371938	0.0381909	0.0325712	TBX2/FOXJ1/ZIC3/NKX3-2/TBX3/DLL1/BMP4/MESP1/LBX1/SOX17/SRF	11
C1	GO:0007186	G protein-coupled receptor signaling pathway	66/1083	357/8043	0.00385523	0.0394669	0.0336594	PTGIR/GRK1/ADM/AVPR2/DRD1/GPR3/HCRT/GPR20/ADCYAP1/OPRL1/MC3R/LOC494564/INS/NPW/LHB/GAL/APLN/ECEL1/CHRM1/SSTR3/NPPA/SSTR2/RAC2/GPR45/CHGA/GPR55/GLP1R/ADRA1A/BDKRB1/GHRH/GPR26/GALP/DGKK/CCKAR/GHRHR/CNR1/GAST/TAC4/CCL1/S1PR3/CCL2/BRS3/CCL17/HCRTR1/GPR139/EDN1/C3/PDYN/AVPR1B/RXFP3/OPRK1/ARRDC3/GLRA4/PROKR1/RS1/RAMP2/DRD2/ADM5/RGS8/GPR4/ADRB3/PNOC/P2RY2/CHRM4/SSTR1/PTH1R	66
C1	GO:0009611	response to wounding	31/1083	142/8043	0.00387139	0.0395136	0.0336992	F7/FOXA2/THBD/SDC1/INHBB/INS/WNT1/F13A1/HPS6/NOG/F8/CYR61/CD9/PEAR1/SERPING1/CD40LG/HMOX1/SLC4A1/F10/SRF/CPB2/ITGA5/DMTN/HABP2/SYK/PLG/RGMA/GPR4/PLET1/CLDN4/PROC	31
C1	GO:0009914	hormone transport	27/1083	119/8043	0.00389175	0.0396029	0.0337754	SCGB1D1/SCT/PHEROC/ADCYAP1/INHBB/GAL/TBX3/SSTR3/PDX1/TNF/SSTR2/GCK/HNF1B/CHGA/SFRP1/HTR1A/GHRH/SOX11/CCKAR/GDF9/INHBA/TCF7L2/FFAR2/LIF/SOX4/GALR1/SSTR1	27
C1	GO:0098609	cell-cell adhesion	52/1083	269/8043	0.00390555	0.039625	0.0337942	KIT/TNFRSF4/GATA3/PLXNB3/FOXJ1/CD93/CBLN1/NRARP/SOX9/NECTIN2/ITGB2/NR4A3/LOC100155738/ICAM4/PCDH11X/WNT1/PCK1/BMP4/RAC2/SMAD7/CRB2/CDH1/PODXL/GPC4/ESAM/DLG4/CYR61/CD9/PEAR1/AKNA/ANXA9/CD40LG/PCDH7/THY1/S100A9/IGF2/SRF/FLOT1/IGFBP2/LOC100152566/ITGA5/SIRPA/KIRREL/EPHB3/DMTN/SYK/LEP/TNFSF9/HAVCR2/CDHR1/TNFSF14/IL18	52
C1	GO:0048667	cell morphogenesis involved in neuron differentiation	32/1083	148/8043	0.00394231	0.0398793	0.0340111	PLXNB3/GBX2/ISLR2/EVX1/SRCIN1/C5H12orf57/EGR2/VAX1/NTRK1/SEMA6A/POU4F3/GDF7/HOXA2/NOG/DPYSL5/CCKAR/LHX2/ISL1/SHOX2/OTX2/THY1/SRF/FLOT1/NKX2-1/PHACTR1/EPHB3/LHFPL5/GLI2/CDHR1/LMX1A/NR2E1/NR4A2	32
C1	GO:0048534	hematopoietic or lymphoid organ development	59/1083	313/8043	0.00395567	0.0398961	0.0340254	KIT/GATA3/CEBPA/LYAR/CEBPE/FOXJ1/GATA2/DLL4/TAL1/SFRP2/NRARP/NKX2-5/FOXE1/CD248/NKX3-2/RARA/WNT1/WNT2B/DLL1/PCK1/NTRK1/HOXA9/BMP4/SIX1/SMAD7/GPR55/C6H19orf68/MLLT3/SFRP1/PRTN3/SIX4/HOXB7/SLC4A1/ETV6/ONECUT1/SRF/IL6R/NFKBIA/CEBPG/INHBA/RUNX1/EPHB3/TMEM176B/DMTN/BATF2/KLF2/HOXA3/LTA/LEP/HYAL2/TNFSF9/LIF/SOX4/JUNB/ST3GAL1/IL31/RAG1/KLF1/C1QC	59
C1	GO:0042476	odontogenesis	13/1083	44/8043	0.00408149	0.0410437	0.0350042	DLX1/DLX2/FGF4/OSR2/BMP4/AQP6/LHX8/C8H4orf26/DSP/AQP5/INHBA/AMELX/GLI2	13
C1	GO:0008016	regulation of heart contraction	14/1083	49/8043	0.00410677	0.0411764	0.0351174	ADM/KCND3/NKX2-5/HRC/TBX18/SMAD7/ADRA1A/STC1/KCNE5/ISL1/SHOX2/RANGRF/KCNE4/ADM5	14
C1	GO:0060070	canonical Wnt signaling pathway	21/1083	86/8043	0.00419405	0.0416143	0.0354908	GATA3/TMEM88/PORCN/SFRP2/SDC1/NRARP/SOX9/SOST/WNT1/WNT2B/NOG/MESP1/SNAI2/MLLT3/SFRP1/ISL1/WNT4/SOX17/TCF7L2/SOX4/PROP1	21
C1	GO:0003143	embryonic heart tube morphogenesis	8/1083	21/8043	0.00422191	0.0416143	0.0354908	TBX2/ZIC3/TBX3/DLL1/MESP1/LBX1/SOX17/SRF	8
C1	GO:0035050	embryonic heart tube development	8/1083	21/8043	0.00422191	0.0416143	0.0354908	TBX2/ZIC3/TBX3/DLL1/MESP1/LBX1/SOX17/SRF	8
C1	GO:0061371	determination of heart left/right asymmetry	8/1083	21/8043	0.00422191	0.0416143	0.0354908	TBX2/ZIC3/TBX3/DLL1/MESP1/LBX1/SOX17/SRF	8
C1	GO:1904888	cranial skeletal system development	8/1083	21/8043	0.00422191	0.0416143	0.0354908	DLX2/FOXE1/FGF4/BMP4/SIX1/HOXA2/SIX4/SIX2	8
C1	GO:0009991	response to extracellular stimulus	26/1083	114/8043	0.0042391	0.0416143	0.0354908	SCT/HCRT/SFRP2/PRKAG3/INHBB/CLPS/WNT2B/LOC100513450/CLPSL2/NPRL3/SNAI2/SLC22A3/SFRP1/GHRH/GALP/RASGRP4/GAST/SCNN1B/VDR/PPARGC1A/GDF15/LEP/NUAK1/SESN2/AOC1/NR4A2	26
C1	GO:0002520	immune system development	62/1083	333/8043	0.004256	0.0416143	0.0354908	KIT/GATA3/CEBPA/LYAR/CEBPE/FOXJ1/GATA2/DLL4/TAL1/SFRP2/NRARP/NKX2-5/FOXE1/CD248/NKX3-2/RARA/WNT1/WNT2B/DLL1/PCK1/NTRK1/HOXA9/BMP4/SIX1/SMAD7/GPR55/C6H19orf68/MLLT3/SFRP1/PRTN3/SIX4/HOXB7/SLC4A1/ETV6/ONECUT1/SRF/LGALS13/IL6R/NFKBIA/CEBPG/INHBA/RUNX1/EPHB3/TMEM176B/DMTN/BATF2/KLF2/HOXA3/TNFAIP3/LTA/LEP/HYAL2/TNFSF9/LIF/SOX4/JUNB/ST3GAL1/IL31/RAG1/HAVCR2/KLF1/C1QC	62
C1	GO:0000578	embryonic axis specification	6/1083	13/8043	0.00433355	0.0416143	0.0354908	NRARP/WNT1/WT1/TBX3/MESP1/PTCH1	6
C1	GO:0001569	branching involved in blood vessel morphogenesis	6/1083	13/8043	0.00433355	0.0416143	0.0354908	DLL4/GBX2/SFRP2/NRARP/SRF/FKBPL	6
C1	GO:0010719	negative regulation of epithelial to mesenchymal transition	6/1083	13/8043	0.00433355	0.0416143	0.0354908	FOXA2/FOXA1/SFRP2/NOG/SFRP1/NKX2-1	6
C1	GO:0014812	muscle cell migration	6/1083	13/8043	0.00433355	0.0416143	0.0354908	NR4A3/SIX1/SIX4/GRB10/IGFBP5/PLAT	6
C1	GO:0030851	granulocyte differentiation	6/1083	13/8043	0.00433355	0.0416143	0.0354908	CEBPA/CEBPE/TAL1/RARA/RUNX1/C1QC	6
C1	GO:0048662	negative regulation of smooth muscle cell proliferation	6/1083	13/8043	0.00433355	0.0416143	0.0354908	PTGIR/APLN/IGFBP5/HMOX1/TNFAIP3/TGFB3	6
C1	GO:0072210	metanephric nephron development	6/1083	13/8043	0.00433355	0.0416143	0.0354908	SALL1/SOX9/WT1/BMP4/SIX2/LIF	6
C1	GO:0072273	metanephric nephron morphogenesis	6/1083	13/8043	0.00433355	0.0416143	0.0354908	SALL1/SOX9/WT1/BMP4/SIX2/LIF	6
C1	GO:0007368	determination of left/right symmetry	10/1083	30/8043	0.00439801	0.0421146	0.0359175	TBX2/FOXJ1/ZIC3/NKX3-2/TBX3/DLL1/MESP1/LBX1/SOX17/SRF	10
C1	GO:0009948	anterior/posterior axis specification	7/1083	17/8043	0.0044708	0.0426917	0.0364097	NRARP/WT1/TBX3/BMP4/MESP1/SIX2/SRF	7
C1	GO:0042060	wound healing	28/1083	126/8043	0.00453061	0.0430815	0.0367421	F7/FOXA2/THBD/SDC1/INS/F13A1/HPS6/NOG/F8/CYR61/CD9/PEAR1/SERPING1/CD40LG/HMOX1/SLC4A1/F10/SRF/CPB2/ITGA5/DMTN/HABP2/SYK/PLG/GPR4/PLET1/CLDN4/PROC	28
C1	GO:0003013	circulatory system process	37/1083	179/8043	0.00453689	0.0430815	0.0367421	ADM/AVPR2/DRD1/DBH/NOS3/KCND3/NKX2-5/HRC/DLL1/TBX18/NPPA/SMAD7/ACTC1/CHGA/GLP1R/ID2/HTR1A/ADRA1A/STC1/AVP/KCNE5/ISL1/TCAP/SHOX2/SCNN1B/EDN1/AVPR1B/KLF2/RANGRF/RAMP2/TPM1/KCNE4/ADM5/GPR4/P2RY2/EDN3/ANPEP	37
C1	GO:0031175	neuron projection development	47/1083	241/8043	0.00497103	0.0470729	0.0401462	PLXNB3/PRDM12/GBX2/ISLR2/EVX1/SRCIN1/SFRP2/C5H12orf57/ADCYAP1/DPYSL4/EFHD1/EGR2/VAX1/NTRK1/SEMA6A/POU4F3/GDF7/HOXA2/NOG/SFRP1/DPYSL5/SYT17/USH1G/CCKAR/CNR1/LHX2/ISL1/NTF4/SHOX2/OTX2/THY1/SRF/FLOT1/VASH2/GFAP/NKX2-1/NYAP1/PHACTR1/EPHB3/RETREG3/LHFPL5/RGMA/NTF3/GLI2/LMX1A/NR2E1/NR4A2	47
C1	GO:0001570	vasculogenesis	9/1083	26/8043	0.00513114	0.0481875	0.0410967	ADM/WT1/ACKR3/ENG/CITED1/SOX17/RAMP2/TGFBR3/JUNB	9
C1	GO:0021766	hippocampus development	9/1083	26/8043	0.00513114	0.0481875	0.0410967	SCT/DLX1/DLX2/HSD3B1/SRF/NKX2-1/BCAN/LMX1A/NR2E1	9
C1	GO:0022037	metencephalon development	9/1083	26/8043	0.00513114	0.0481875	0.0410967	OTX1/GBX2/CBLN1/WNT1/DLL1/PTF1A/CEND1/GLI2/LMX1A	9
C2a	GO:0022613	ribonucleoprotein complex biogenesis	115/2608	181/8043	4.11783e-18	1.4993e-14	1.45034e-14	RPL23A/NOL9/FAM207A/MRPL20/CCDC94/KRI1/GEMIN5/RRS1/TARBP2/IMP3/SKIV2L2/PRPF31/NOL11/HELB/SNRPD1/NUFIP1/EIF6/RPL35/TSR3/NSA2/SBDS/RPS28/PSIP1/GTPBP4/USP39/RPL38/RPL7/GEMIN6/EIF3K/EIF4A3/DDX20/UTP15/RPS25/STRAP/SNRPD3/CLP1/DENR/NHP2/RPS6/RPL27/NOB1/MRTO4/DDX52/WDR74/PTGES3/RPL6/NAF1/SLU7/WDR12/EIF4H/SRSF6/RPL14/SFSWAP/EIF3H/EXOSC2/RPS27L/DDX28/EXOSC3/MTERF3/GAR1/CLNS1A/EIF2S2/UTP20/EMG1/RSL24D1/NOP…	115
C2a	GO:0046907	intracellular transport	237/2608	468/8043	3.19037e-17	4.22288e-14	4.08498e-14	HHEX/STX16/SNX5/PSEN1/TIMM29/SLC9A3R1/ENY2/MAPK14/IFT20/CHCHD4/SNX27/STX10/CALR/LMAN2/SPCS2/WDR91/SEC61A2/RAB11A/RAE1/WHAMM/ATPIF1/STXBP1/SMO/RRS1/ZPR1/TIMM21/TIMM22/NPC1/MON1B/HAP1/VTI1B/COPB2/TBC1D15/RILPL1/ARL5B/ALMS1/LEPROT/NUTF2/TRAPPC1/RAB5C/IFT46/EIF6/SNX6/SEC63/TOMM7/PEX14/BECN1/FAM173A/PLK3/RAB3D/VPS29/ARL1/AP1AR/DDX19B/ZFAND1/DSCR3/RAB21/FNBP1L/TOMM20/SEC61B/SNX32/UBB/LOC100511376/TRAPP…	237
C2a	GO:0006396	RNA processing	216/2608	417/8043	3.47944e-17	4.22288e-14	4.08498e-14	ESRP1/ELP2/LSM3/GRSF1/RBM25/RBM39/RBM14/NOL9/CMTR1/FAM207A/BUD31/SRSF2/MTFMT/CCDC94/KRI1/MOCS3/GEMIN5/LIN28A/NUDT21/ZC3H10/RBBP6/RRS1/TARBP2/DHX8/ZPR1/IMP3/RBM17/SLC38A2/RBM5/SKIV2L2/PRPF31/NOL11/SMN1/HELB/RBM4/LOC100739098/SNRPD1/LSM1/EIF6/RPL35/U2AF1L4/TSR3/PRPF40A/NSA2/U2SURP/SBDS/RPS28/CIRBP/PSIP1/ELP1/SF3A3/GTPBP4/USP39/RPL7/GEMIN6/U2AF2/SNRPD2/EIF4A3/DDX20/UTP15/HNRNPM/RPS25/PUSL1/STRAP/SRS…	216
C2a	GO:0006412	translation	158/2608	283/8043	1.31049e-16	1.19288e-13	1.15392e-13	RPL23A/IGF2BP1/RPL26L1/RPS24/RPL36/CNOT8/MRPS18B/RPL12/LOC100623540/CALR/EIF2S1/MRPL20/GARS/MRPS17/GEMIN5/LIN28A/TARBP2/UNK/EIF4A2/ETF1/KLHL25/DHX29/FXR1/ENC1/RPS13/RPL10A/RPLP1/RPL35/EIF4EBP2/RPLP2/KARS/GFM2/RPS5/RPS28/MRPL58/DDX6/MRPL13/RPL8/RPS3A/RPL38/EIF3K/EIF4A3/EARS2/RPS26/ATM/EEF2/SERP1/MRPL35/APP/CTIF/DENR/EIF2A/FARSA/AURKA/RPS6/MRPL18/RPL27/RGS2/ELAVL1/MRPS16/CAPRIN1/RPL15/PAIP1/LARP6/D…	158
C2a	GO:0043043	peptide biosynthetic process	161/2608	291/8043	2.07718e-16	1.5126e-13	1.46321e-13	GCLC/RPL23A/IGF2BP1/RPL26L1/RPS24/RPL36/CNOT8/MRPS18B/RPL12/LOC100623540/CALR/EIF2S1/MRPL20/GARS/MRPS17/GEMIN5/LIN28A/TARBP2/UNK/EIF4A2/ETF1/KLHL25/DHX29/FXR1/ENC1/RPS13/RPL10A/RPLP1/RPL35/EIF4EBP2/RPLP2/KARS/GFM2/RPS5/RPS28/MRPL58/DDX6/MRPL13/RPL8/RPS3A/RPL38/EIF3K/EIF4A3/EARS2/RPS26/ATM/EEF2/SERP1/MRPL35/APP/CTIF/DENR/EIF2A/FARSA/AURKA/RPS6/MRPL18/SLC1A1/RPL27/RGS2/ELAVL1/MRPS16/CAPRIN1/RPL15/P…	161
C2a	GO:0006886	intracellular protein transport	170/2608	315/8043	7.04498e-16	4.27513e-13	4.13553e-13	HHEX/STX16/SNX5/PSEN1/TIMM29/ENY2/MAPK14/IFT20/CHCHD4/SNX27/STX10/CALR/SPCS2/SEC61A2/RAB11A/RAE1/ATPIF1/STXBP1/SMO/RRS1/ZPR1/TIMM21/TIMM22/MON1B/HAP1/VTI1B/COPB2/TBC1D15/RILPL1/ARL5B/NUTF2/RAB5C/IFT46/EIF6/SNX6/SEC63/TOMM7/PEX14/PLK3/RAB3D/ARL1/DDX19B/ZFAND1/DSCR3/RAB21/TOMM20/SEC61B/SEC61G/HSPB11/CHTOP/VPS26B/AP3M1/SRP54/AP2S1/HSPA9/SLC1A1/RAB32/ZDHHC6/SCARB2/PEX13/RAB22A/TBC1D9B/SNX2/HIKESHI/KP…	170
C2a	GO:0071826	ribonucleoprotein complex subunit organization	63/2608	87/8043	1.86477e-14	9.69947e-12	9.38274e-12	RPL23A/MRPL20/CCDC94/GEMIN5/RRS1/TARBP2/PRPF31/SNRPD1/NUFIP1/EIF6/RPS28/PSIP1/ZFAND1/USP39/RPL38/GEMIN6/EIF3K/DDX20/STRAP/SNRPD3/CLP1/DENR/MRTO4/PTGES3/RPL6/NAF1/SLU7/EIF4H/SRSF6/SFSWAP/VCP/EIF3H/RPS27L/DDX28/CLNS1A/EIF2S2/TFIP11/RSL24D1/ABT1/SHQ1/RPS15/SNRPC/LSM2/EIF3M/FASTKD2/LOC100738684/RPS27/RPSA/SRSF1/PRPF19/LUC7L/EIF3J/AAR2/SF3B1/MRPS11/EIF3I/PPAN/RPLP0/TAF9/GEMIN2/PIH1D1/SNRPG/EIF3A	63
C2a	GO:0006518	peptide metabolic process	186/2608	363/8043	2.50181e-14	1.13864e-11	1.10146e-11	GCLC/RPL23A/IGF2BP1/RPL26L1/PSEN1/RPS24/RPL36/CNOT8/PTGES2/MRPS18B/RPL12/LOC100623540/CALR/EIF2S1/MRPL20/GARS/SPCS2/MRPS17/GEMIN5/LIN28A/TARBP2/UNK/EIF4A2/ETF1/KLHL25/DHX29/FXR1/ENC1/GGT7/RPS13/RPL10A/RPLP1/RPL35/EIF4EBP2/RPLP2/KARS/GFM2/RPS5/RPS28/MRPL58/DDX6/PCSK2/MRPL13/GSTO1/RPL8/RPS3A/RPL38/EIF3K/SP1/EIF4A3/EARS2/RPS26/ATM/EEF2/SERP1/MRPL35/APP/CTIF/DENR/EIF2A/FARSA/AURKA/RPS6/MRPL18/SLC1A1/…	186
C2a	GO:0022618	ribonucleoprotein complex assembly	60/2608	82/8043	3.62069e-14	1.46477e-11	1.41694e-11	RPL23A/MRPL20/CCDC94/GEMIN5/RRS1/TARBP2/PRPF31/SNRPD1/NUFIP1/EIF6/RPS28/PSIP1/USP39/RPL38/GEMIN6/EIF3K/DDX20/STRAP/SNRPD3/CLP1/DENR/MRTO4/PTGES3/RPL6/NAF1/SLU7/EIF4H/SRSF6/SFSWAP/EIF3H/RPS27L/DDX28/CLNS1A/EIF2S2/RSL24D1/ABT1/SHQ1/RPS15/SNRPC/LSM2/EIF3M/FASTKD2/LOC100738684/RPS27/RPSA/SRSF1/PRPF19/LUC7L/EIF3J/AAR2/SF3B1/MRPS11/EIF3I/PPAN/RPLP0/TAF9/GEMIN2/PIH1D1/SNRPG/EIF3A	60
C2a	GO:0044265	cellular macromolecule catabolic process	186/2608	372/8043	4.85608e-13	1.7681e-10	1.71036e-10	TRIM9/USP37/CNOT9/LSM3/FAM46A/IGF2BP1/MYLIP/UBE2J2/PSEN1/RNASEH2A/RNF114/WAC/CNOT8/PSMB5/TNFAIP1/PSMB9/RNF41/TRIM39/EDC3/KCTD10/UBE3B/C1H18orf25/ATE1/UBE3A/NSFL1C/LIN28A/RNF13/ATPIF1/CCNF/RBBP6/USP18/ZPR1/HAMP/ETF1/RNF125/SKIV2L2/HSP90B1/SUMO2/ENC1/PSMB11/LSM1/FBXL20/PSMD1/PLK3/MIB1/YOD1/PSMD4/SPOP/PSME3/PSMA6/EIF4A3/UBB/SPATA18/ATM/UBE2K/RNFT2/PITHD1/PSMB7/STT3B/CTIF/CTSW/PSMA3/SIDT2/DCP2/KEAP1/…	186
C2a	GO:0043604	amide biosynthetic process	178/2608	355/8043	1.15753e-12	3.83144e-10	3.70632e-10	GCLC/RPL23A/IGF2BP1/RPL26L1/RPS24/RPL36/ELOVL1/CNOT8/MRPS18B/ACLY/RPL12/LOC100623540/CALR/EIF2S1/MRPL20/GARS/MRPS17/GEMIN5/LIN28A/TARBP2/UNK/EIF4A2/ETF1/KLHL25/DHX29/ST8SIA2/FXR1/ENC1/RPS13/RPL10A/RPLP1/RPL35/EIF4EBP2/RPLP2/KARS/PPCS/GFM2/RPS5/RPS28/MRPL58/DDX6/MRPL13/RPL8/RPS3A/B3GALT4/RPL38/EIF3K/EIF4A3/EARS2/RPS26/ATM/EEF2/SERP1/MRPL35/APP/CTIF/DENR/EIF2A/FARSA/AURKA/MPC2/RPS6/MRPL18/SLC1A1/RP…	178
C2a	GO:0006974	cellular response to DNA damage stimulus	154/2608	304/8043	1.50456e-11	4.56509e-09	4.41602e-09	FOXO1/CASP9/ZBTB1/SPRED1/UNG/OTUB1/HDAC10/BCL2L1/PSEN1/RNASEH2A/WAC/MAPK14/XRCC3/TRIM39/XPA/CDKN2D/GINS2/BCL6/POLG/PARPBP/RBBP6/MCL1/RAD21/MMS19/SWSAP1/OARD1/DEK/WRAP53/RBM17/SKIV2L2/TP53/FAAP24/PNKP/HELB/XRCC4/MORC2/RNF8/TERF2IP/NABP2/XRCC2/PLK3/CRY1/RAD9B/AEN/MDC1/NKX3-1/MORF4L1/RMI1/SPATA18/ATM/LIG4/GTF2H1/RNF138/SAMHD1/TIGAR/ERCC3/TDP1/WDR76/BCL2L12/RAD51/GEN1/POLR2I/POLM/CHEK1/SMC6/PARP2/KIF…	154
C2a	GO:0006259	DNA metabolic process	152/2608	300/8043	2.01674e-11	5.64842e-09	5.46397e-09	ZBTB1/UNG/OTUB1/TINF2/HDAC10/GINS1/RNASEH2A/XRCC3/XPA/CDKN2D/GINS2/BCL6/HMBOX1/POLG/RTFDC1/PARPBP/RAD21/MMS19/SWSAP1/DEK/WRAP53/RBM17/TP53/STAT6/CD40/FAAP24/PNKP/HELB/XRCC4/RNF8/TERF2IP/CCT3/NABP2/XRCC2/RAD9B/MDC1/THAP9/MORF4L1/DNAJC2/RMI1/ATM/TNKS/LIG4/GTF2H1/RNF138/TOP2A/SLC15A4/SAMHD1/TIGAR/GMNC/ERCC3/HNRNPA1/TDP1/RAD51/DFFA/PTGES3/GEN1/POLR2I/POLM/CHEK1/SMC6/PARP2/KIF22/BRCC3/DCLRE1A/HELLS/RA…	152
C2a	GO:0042254	ribosome biogenesis	76/2608	124/8043	2.8711e-11	7.46691e-09	7.22308e-09	RPL23A/NOL9/FAM207A/MRPL20/KRI1/RRS1/IMP3/SKIV2L2/NOL11/HELB/EIF6/RPL35/TSR3/NSA2/SBDS/RPS28/GTPBP4/RPL7/EIF4A3/UTP15/RPS25/NHP2/RPS6/RPL27/NOB1/MRTO4/DDX52/WDR74/RPL6/NAF1/WDR12/RPL14/EXOSC2/RPS27L/DDX28/EXOSC3/MTERF3/GAR1/UTP20/EMG1/RSL24D1/NOP9/ABT1/FTSJ3/SHQ1/UTP11/RPS7/RPS15/WDR18/WDR55/NIP7/DDX49/NAT10/NOC4L/RPS16/NOL6/FASTKD2/SDAD1/BUD23/RPS27/RPSA/RPL26/DIMT1/RBFA/SNU13/C4H8orf59/RPS21/SA…	76
C2a	GO:0006281	DNA repair	102/2608	184/8043	6.6123e-11	1.60503e-08	1.55261e-08	ZBTB1/UNG/OTUB1/HDAC10/RNASEH2A/XRCC3/XPA/CDKN2D/GINS2/POLG/PARPBP/RAD21/MMS19/SWSAP1/DEK/WRAP53/RBM17/TP53/FAAP24/PNKP/HELB/XRCC4/RNF8/TERF2IP/NABP2/XRCC2/RAD9B/MDC1/MORF4L1/RMI1/ATM/LIG4/GTF2H1/RNF138/SAMHD1/TIGAR/ERCC3/TDP1/RAD51/GEN1/POLR2I/POLM/CHEK1/PARP2/KIF22/BRCC3/DCLRE1A/RAD23B/FTO/FANCI/RFWD3/UBE2B/MSH2/TEX15/VCP/UBQLN4/ERCC8/APTX/APLF/RPA1/DDB2/INTS3/RFC4/MLH1/MPG/MSH6/INO80/ZNF365/RU…	102
C2a	GO:0043603	cellular amide metabolic process	221/2608	485/8043	3.32518e-10	7.56687e-08	7.31978e-08	GCLC/RPL23A/IGF2BP1/RPL26L1/PSEN1/RPS24/RPL36/ELOVL1/CNOT8/PTGES2/MRPS18B/ACLY/RPL12/LOC100623540/CALR/EIF2S1/MRPL20/GARS/SPCS2/MRPS17/GEMIN5/LIN28A/TARBP2/UNK/HEXB/EIF4A2/ETF1/KLHL25/DHX29/ST8SIA2/FXR1/ENC1/GGT7/RPS13/RPL10A/RPLP1/RPL35/EIF4EBP2/RPLP2/KARS/PPCS/NEU1/GFM2/RPS5/RPS28/PGAM1/MRPL58/DDX6/PCSK2/MRPL13/GSTO1/RPL8/RPS3A/B3GALT4/RPL38/EIF3K/SP1/FAR2/EIF4A3/EARS2/RPS26/ATM/EEF2/SERP1/MRPL…	221
C2a	GO:0009057	macromolecule catabolic process	206/2608	447/8043	4.17169e-10	8.93477e-08	8.64301e-08	FOXO1/ADRA2A/TRIM9/PSMC1/USP37/CNOT9/LSM3/FAM46A/IGF2BP1/PGLYRP1/MYLIP/UBE2J2/PSEN1/RNASEH2A/RNF114/WAC/CNOT8/PSMB5/TNFAIP1/PSMB9/RNF41/TRIM39/EDC3/KCTD10/UBE3B/C1H18orf25/ATE1/UBE3A/NSFL1C/LIN28A/RNF13/ATPIF1/CCNF/RBBP6/USP18/ZPR1/HAMP/ETF1/RNF125/EXT1/SKIV2L2/HSP90B1/SUMO2/ENC1/RHBDD3/PSMB11/LSM1/FBXL20/PSMD1/PLK3/MIB1/YOD1/PSMD4/SPOP/WNT5A/PSME3/PSMA6/EIF4A3/UBB/SPATA18/ATM/UBE2K/RNFT2/PITHD1/…	206
C2a	GO:0044257	cellular protein catabolic process	136/2608	272/8043	7.5578e-10	1.52877e-07	1.47885e-07	TRIM9/USP37/MYLIP/UBE2J2/PSEN1/RNF114/WAC/PSMB5/TNFAIP1/PSMB9/RNF41/TRIM39/KCTD10/UBE3B/C1H18orf25/ATE1/UBE3A/NSFL1C/RNF13/ATPIF1/CCNF/RBBP6/USP18/HAMP/RNF125/HSP90B1/SUMO2/ENC1/PSMB11/FBXL20/PSMD1/PLK3/MIB1/YOD1/PSMD4/SPOP/PSME3/PSMA6/UBB/SPATA18/UBE2K/RNFT2/PITHD1/PSMB7/STT3B/CTSW/PSMA3/KEAP1/RNF11/PSMB3/FBXO33/VHL/PSMB1/BAG2/PSMA5/SELENOS/RAD23B/RNF7/USP5/CUL4A/PTTG1IP/EDEM2/WWP1/PSMD3/UBE2B/N…	136
C2a	GO:0051603	proteolysis involved in cellular protein catabolic process	131/2608	260/8043	8.27124e-10	1.58503e-07	1.53327e-07	TRIM9/USP37/MYLIP/UBE2J2/PSEN1/RNF114/WAC/PSMB5/TNFAIP1/PSMB9/RNF41/TRIM39/KCTD10/UBE3B/C1H18orf25/ATE1/UBE3A/NSFL1C/RNF13/ATPIF1/CCNF/RBBP6/USP18/RNF125/HSP90B1/SUMO2/ENC1/PSMB11/FBXL20/PSMD1/PLK3/MIB1/YOD1/PSMD4/SPOP/PSME3/PSMA6/UBB/UBE2K/RNFT2/PITHD1/PSMB7/STT3B/CTSW/PSMA3/KEAP1/RNF11/PSMB3/FBXO33/VHL/PSMB1/BAG2/PSMA5/SELENOS/RAD23B/RNF7/USP5/CUL4A/EDEM2/WWP1/PSMD3/UBE2B/NEMF/VPS4B/PSMC5/VCP/U…	131
C2a	GO:0006511	ubiquitin-dependent protein catabolic process	114/2608	219/8043	9.04041e-10	1.64581e-07	1.59206e-07	TRIM9/USP37/MYLIP/UBE2J2/PSEN1/RNF114/WAC/PSMB5/TNFAIP1/PSMB9/TRIM39/KCTD10/UBE3B/C1H18orf25/ATE1/UBE3A/NSFL1C/RNF13/CCNF/RBBP6/USP18/RNF125/HSP90B1/SUMO2/PSMB11/FBXL20/PSMD1/PLK3/MIB1/YOD1/PSMD4/SPOP/PSMA6/UBE2K/PSMB7/STT3B/PSMA3/KEAP1/RNF11/PSMB3/FBXO33/PSMB1/PSMA5/SELENOS/RAD23B/RNF7/USP5/CUL4A/EDEM2/WWP1/PSMD3/UBE2B/NEMF/VPS4B/PSMC5/VCP/UCHL1/UBQLN4/ERCC8/TRPC4AP/UBXN2A/USP16/FBXL12/SIAH2/ANA…	114
C2a	GO:0043632	modification-dependent macromolecule catabolic process	116/2608	225/8043	1.36815e-09	2.37211e-07	2.29465e-07	TRIM9/USP37/MYLIP/UBE2J2/PSEN1/RNF114/WAC/PSMB5/TNFAIP1/PSMB9/TRIM39/KCTD10/UBE3B/C1H18orf25/ATE1/UBE3A/NSFL1C/RNF13/CCNF/RBBP6/USP18/RNF125/HSP90B1/SUMO2/PSMB11/FBXL20/PSMD1/PLK3/MIB1/YOD1/PSMD4/SPOP/PSMA6/UBB/UBE2K/PSMB7/STT3B/PSMA3/KEAP1/RNF11/PSMB3/FBXO33/PSMB1/PSMA5/SELENOS/RAD23B/RNF7/USP5/CUL4A/EDEM2/WWP1/PSMD3/UBE2B/NEMF/VPS4B/PSMC5/VCP/UCHL1/UBQLN4/EXOSC3/ERCC8/TRPC4AP/UBXN2A/USP16/FBXL1…	116
C2a	GO:0019941	modification-dependent protein catabolic process	115/2608	223/8043	1.57968e-09	2.61438e-07	2.52901e-07	TRIM9/USP37/MYLIP/UBE2J2/PSEN1/RNF114/WAC/PSMB5/TNFAIP1/PSMB9/TRIM39/KCTD10/UBE3B/C1H18orf25/ATE1/UBE3A/NSFL1C/RNF13/CCNF/RBBP6/USP18/RNF125/HSP90B1/SUMO2/PSMB11/FBXL20/PSMD1/PLK3/MIB1/YOD1/PSMD4/SPOP/PSMA6/UBB/UBE2K/PSMB7/STT3B/PSMA3/KEAP1/RNF11/PSMB3/FBXO33/PSMB1/PSMA5/SELENOS/RAD23B/RNF7/USP5/CUL4A/EDEM2/WWP1/PSMD3/UBE2B/NEMF/VPS4B/PSMC5/VCP/UCHL1/UBQLN4/ERCC8/TRPC4AP/UBXN2A/USP16/FBXL12/SIAH2…	115
C2a	GO:0034470	ncRNA processing	90/2608	164/8043	1.77602e-09	2.81152e-07	2.71971e-07	ELP2/NOL9/FAM207A/MTFMT/KRI1/MOCS3/LIN28A/RRS1/TARBP2/IMP3/SKIV2L2/NOL11/HELB/EIF6/RPL35/TSR3/NSA2/SBDS/RPS28/ELP1/GTPBP4/RPL7/EIF4A3/UTP15/RPS25/PUSL1/CLP1/NHP2/RPS6/RPL27/NOB1/DDX52/QTRT1/RPP30/ELAC1/ZBTB8OS/NAF1/ELP6/POP1/WDR12/TYW3/EXOSC2/EXOSC3/GAR1/UTP20/THUMPD1/EMG1/ADAT2/INTS3/NOP9/ABT1/FTSJ3/SHQ1/UTP11/RPS7/WDR18/WDR55/PUS3/DDX49/SSB/NAT10/METTL3/RPS16/NOL6/TRMT10B/TYW5/RPP38/BUD23/BCDIN…	90
C2a	GO:0016071	mRNA metabolic process	136/2608	275/8043	1.91128e-09	2.89957e-07	2.80488e-07	ZBTB1/CNOT9/LSM3/FAM46A/IGF2BP1/RBM25/CNOT8/RBM39/RBM14/CMTR1/BUD31/SRSF2/EDC3/CCDC94/GEMIN5/NUDT21/ZC3H10/RBBP6/ETF1/RBM17/RBM5/PRPF31/SMN1/RBM4/SNRPD1/LSM1/DNAJB11/U2AF1L4/PRPF40A/CIRBP/PSIP1/SF3A3/USP39/GEMIN6/U2AF2/SNRPD2/EIF4A3/DDX20/HNRNPM/ATM/STRAP/SRSF4/DHX16/SNRPD3/CDC40/APP/CLP1/CTIF/SCNM1/DCP2/HNRNPA1/ELAVL1/MFAP1/POLR2I/SF3A1/PTBP1/PCF11/PABPC4/PDE12/RBM4B/SLU7/RBM7/SMG9/SMNDC1/SF3B5/…	136
C2a	GO:0002181	cytoplasmic translation	36/2608	50/8043	1.04409e-08	1.52061e-06	1.47096e-06	LOC100623540/LIN28A/UNK/EIF4A2/ETF1/RPLP1/RPLP2/RPS28/RPL8/EIF3K/RPS26/DENR/DRG1/RPL22/RPL6/EIF4A1/EIF4H/EIF3H/RWDD1/EIF2S2/RPL9/RPL31/METTL3/EIF3M/LOC100738684/ZC3H15/RPSA/RPL26/RPL29/EIF3J/RPS21/DPH5/EIF3I/RPS23/RPLP0/EIF3A	36
C2a	GO:0033365	protein localization to organelle	117/2608	235/8043	1.62461e-08	2.27507e-06	2.20078e-06	HHEX/NRP1/TINF2/TRIM8/PSEN1/TIMM29/MAPK14/IFT20/CHCHD4/CALR/NSFL1C/SPCS2/SEC61A2/RAB11A/ATPIF1/SMO/RRS1/ZPR1/RAD21/TIMM21/TIMM22/LEMD2/MON1B/ZDHHC5/WRAP53/ARL5B/NUTF2/TERF2IP/PAQR3/CCT3/NABP2/SEC63/TOMM7/PEX14/TMEM107/ARL1/TOMM20/BUB3/MFSD1/SEC61G/LAMTOR5/TNKS/MORC3/SRP54/SCARB2/PEX13/HIKESHI/KPNA5/ELAVL1/ADAM10/SSR3/PEX12/PEX26/MX1/TNPO2/KPNB1/PTTG1IP/WRB/TESK1/SUPT7L/LAMP5/STAT3/APPL1/BBS1/TOMM…	117
C2a	GO:0030163	protein catabolic process	155/2608	331/8043	1.81891e-08	2.45284e-06	2.37274e-06	FOXO1/ADRA2A/TRIM9/PSMC1/USP37/MYLIP/UBE2J2/PSEN1/RNF114/WAC/PSMB5/TNFAIP1/PSMB9/RNF41/TRIM39/KCTD10/UBE3B/C1H18orf25/ATE1/UBE3A/NSFL1C/RNF13/ATPIF1/CCNF/RBBP6/USP18/HAMP/RNF125/EXT1/HSP90B1/SUMO2/ENC1/RHBDD3/PSMB11/FBXL20/PSMD1/PLK3/MIB1/YOD1/PSMD4/SPOP/WNT5A/PSME3/PSMA6/UBB/SPATA18/UBE2K/RNFT2/PITHD1/PSMB7/STT3B/TIPARP/CTSW/NRDC/PSMA3/KEAP1/RNF11/PSMB3/FBXO33/VHL/PSMB1/BAG2/PSMA5/SELENOS/TRAF2/…	155
C2a	GO:0008380	RNA splicing	100/2608	195/8043	2.70022e-08	3.51125e-06	3.39659e-06	ESRP1/LSM3/RBM25/RBM39/RBM14/BUD31/SRSF2/CCDC94/GEMIN5/ZC3H10/DHX8/ZPR1/RBM17/SLC38A2/RBM5/PRPF31/LOC100739098/SNRPD1/U2AF1L4/PRPF40A/CIRBP/PSIP1/SF3A3/USP39/GEMIN6/U2AF2/SNRPD2/EIF4A3/DDX20/HNRNPM/STRAP/SRSF4/DHX16/SNRPD3/CDC40/CLP1/CLK1/SCNM1/HNRNPA1/MFAP1/SF3A1/PTBP1/PABPC4/RBM4B/SLU7/RBM7/SF3B5/TRA2A/DCPS/SRSF6/RBM12/PRPF38B/PNN/SFSWAP/SRSF12/CLNS1A/TFIP11/TRA2B/SF3B2/TXNL4A/PRPF4/DDX39B/METT…	100
C2a	GO:0006260	DNA replication	47/2608	74/8043	3.58387e-08	4.49961e-06	4.35267e-06	GINS1/GRWD1/GINS2/POLG/RTFDC1/RBBP6/ZPR1/HELB/NFIB/GTPBP4/DNAJC2/LIG4/SAMHD1/GMNC/RAD51/GEN1/PCNA/MCMBP/GINS4/ESCO1/E2F8/RFWD3/TIPIN/DDX21/RPA1/SMC3/TBRG1/RFC4/WDR18/INO80/ZNF365/GMNN/SUPT16H/CDC45/BAZ1A/RFC5/FEN1/TERF1/MCM2/GINS3/EREG/RPA2/E2F7/POLE2/DONSON/MCM3/BOD1L1	47
C2a	GO:0006397	mRNA processing	106/2608	212/8043	5.82046e-08	7.0641e-06	6.83343e-06	LSM3/RBM25/RBM39/RBM14/CMTR1/BUD31/SRSF2/CCDC94/GEMIN5/NUDT21/ZC3H10/RBBP6/RBM17/RBM5/PRPF31/SMN1/RBM4/SNRPD1/LSM1/U2AF1L4/PRPF40A/CIRBP/PSIP1/SF3A3/USP39/GEMIN6/U2AF2/SNRPD2/EIF4A3/DDX20/HNRNPM/STRAP/SRSF4/DHX16/SNRPD3/CDC40/APP/CLP1/SCNM1/HNRNPA1/MFAP1/SF3A1/PTBP1/PCF11/PABPC4/RBM4B/SLU7/RBM7/SMNDC1/SF3B5/TRA2A/DCPS/SRSF6/PRPF38B/PNN/SFSWAP/SRSF12/PAN2/CLNS1A/TFIP11/PAPOLA/TRA2B/HNRNPA2B1/AKAP8…	106
C2a	GO:0006364	rRNA processing	54/2608	90/8043	6.0547e-08	7.11134e-06	6.87912e-06	NOL9/FAM207A/KRI1/RRS1/IMP3/SKIV2L2/NOL11/HELB/EIF6/RPL35/TSR3/NSA2/SBDS/RPS28/GTPBP4/RPL7/EIF4A3/UTP15/RPS25/NHP2/RPS6/RPL27/NOB1/DDX52/NAF1/WDR12/EXOSC2/EXOSC3/GAR1/UTP20/EMG1/NOP9/ABT1/FTSJ3/SHQ1/UTP11/RPS7/WDR18/WDR55/DDX49/NAT10/RPS16/NOL6/BUD23/RPL26/DIMT1/RBFA/RPS21/SART1/MRPS11/PPAN/UTP6/PIH1D1/RPS8	54
C2a	GO:0016072	rRNA metabolic process	55/2608	93/8043	9.16963e-08	1.04333e-05	1.00926e-05	NOL9/FAM207A/KRI1/RRS1/IMP3/SKIV2L2/NOL11/HELB/EIF6/RPL35/TSR3/NSA2/SBDS/RPS28/GTPBP4/RPL7/EIF4A3/UTP15/RPS25/NHP2/RPS6/RPL27/NOB1/DDX52/NAF1/C2H19orf43/WDR12/EXOSC2/EXOSC3/GAR1/UTP20/EMG1/NOP9/ABT1/FTSJ3/SHQ1/UTP11/RPS7/WDR18/WDR55/DDX49/NAT10/RPS16/NOL6/BUD23/RPL26/DIMT1/RBFA/RPS21/SART1/MRPS11/PPAN/UTP6/PIH1D1/RPS8	55
C2a	GO:0010498	proteasomal protein catabolic process	81/2608	153/8043	9.69737e-08	1.06994e-05	1.03501e-05	TRIM9/UBE2J2/PSEN1/WAC/PSMB5/TNFAIP1/PSMB9/RNF41/TRIM39/KCTD10/ATE1/NSFL1C/CCNF/HSP90B1/SUMO2/ENC1/PSMB11/FBXL20/PSMD1/PLK3/YOD1/PSMD4/SPOP/PSME3/UBB/UBE2K/RNFT2/PITHD1/PSMB7/STT3B/PSMA3/PSMB3/FBXO33/VHL/PSMB1/BAG2/PSMA5/SELENOS/RAD23B/EDEM2/WWP1/UBE2B/NEMF/PSMC5/VCP/UBQLN4/ERCC8/UBXN2A/FBXL12/SIAH2/ANAPC10/DDRGK1/PSMA1/RACK1/FAF2/DNAJB9/UBXN4/BAG6/TOPORS/USP44/N4BP1/RNF122/CUL5/FBXO4/RPL11/FBXO3…	81
C2a	GO:0000278	mitotic cell cycle	124/2608	260/8043	1.4231e-07	1.52398e-05	1.47421e-05	RGCC/CDKN1B/GINS1/BCL2L1/WDR62/CCNO/SLC9A3R1/CDK10/KLF11/XRCC3/SPRY2/WRAP73/TRIM39/CDKN2D/CEP55/NSFL1C/RTFDC1/RAB11A/RAE1/CCSAP/CCNA1/RRS1/ZPR1/KIF11/RAD21/CCNG1/THAP1/TACC3/TUBB/NABP2/XRCC2/PLK3/SBDS/TUBGCP3/PSME3/NKX3-1/BUB3/PKD2/ATM/DMRT1/APP/TNKS/LOC100510930/AURKA/RPS6/BTG3/SKA1/TUBA4A/CLTC/WEE1/BIRC5/CENPH/RAD51/MZT1/CHMP5/CDKN2C/GEN1/CHEK1/CCNB1/DRG1/BTG1/SPRY1/DLGAP5/CDC25C/E2F8/TGFA/SPAS…	124
C2a	GO:0034660	ncRNA metabolic process	103/2608	208/8043	1.66398e-07	1.73101e-05	1.67449e-05	ELP2/NOL9/FAM207A/MTFMT/GARS/KRI1/MOCS3/LIN28A/RRS1/TARBP2/IMP3/SKIV2L2/NOL11/HELB/EIF6/RPL35/KARS/TSR3/NSA2/SBDS/RPS28/ELP1/GTPBP4/RPL7/EIF4A3/EARS2/UTP15/RPS25/PUSL1/CLP1/FARSA/NHP2/RPS6/EXD1/RPL27/NOB1/DDX52/QTRT1/DTD2/RPP30/ELAC1/ZBTB8OS/NAF1/GATC/ELP6/C2H19orf43/DTD1/POP1/WDR12/TYW3/EXOSC2/EXOSC3/GAR1/UTP20/THUMPD1/EMG1/ADAT2/INTS3/NOP9/ABT1/FTSJ3/SHQ1/UTP11/RPS7/WDR18/WDR55/PUS3/DDX49/SSB/N…	103
C2a	GO:0042273	ribosomal large subunit biogenesis	22/2608	27/8043	2.09555e-07	2.11942e-05	2.05021e-05	RPL23A/NOL9/MRPL20/RRS1/EIF6/RPL35/GTPBP4/RPL7/NHP2/MRTO4/WDR74/RPL6/WDR12/RPL14/DDX28/RSL24D1/NIP7/FASTKD2/SDAD1/RPL26/PPAN/RPLP0	22
C2a	GO:0000375	RNA splicing, via transesterification reactions	77/2608	148/8043	5.08239e-07	4.74487e-05	4.58993e-05	LSM3/RBM25/RBM39/RBM14/BUD31/SRSF2/CCDC94/GEMIN5/ZC3H10/RBM17/RBM5/PRPF31/SNRPD1/U2AF1L4/PRPF40A/PSIP1/SF3A3/USP39/GEMIN6/EIF4A3/DDX20/HNRNPM/STRAP/DHX16/SNRPD3/CDC40/HNRNPA1/MFAP1/PTBP1/RBM4B/SLU7/RBM7/SF3B5/TRA2A/DCPS/SRSF6/PRPF38B/SFSWAP/SRSF12/CLNS1A/TFIP11/TRA2B/SF3B2/TXNL4A/PRPF4/DDX39B/METTL3/SNRPC/DAZAP1/LSM5/LSM2/METTL14/CDC5L/PRDX6/MAGOH/SRSF1/RBM8A/SF1/CWC15/SON/ZMAT2/PRPF19/LUC7L/SF3B…	77
C2a	GO:0000377	RNA splicing, via transesterification reactions with bulged adenosine as nucleophile	77/2608	148/8043	5.08239e-07	4.74487e-05	4.58993e-05	LSM3/RBM25/RBM39/RBM14/BUD31/SRSF2/CCDC94/GEMIN5/ZC3H10/RBM17/RBM5/PRPF31/SNRPD1/U2AF1L4/PRPF40A/PSIP1/SF3A3/USP39/GEMIN6/EIF4A3/DDX20/HNRNPM/STRAP/DHX16/SNRPD3/CDC40/HNRNPA1/MFAP1/PTBP1/RBM4B/SLU7/RBM7/SF3B5/TRA2A/DCPS/SRSF6/PRPF38B/SFSWAP/SRSF12/CLNS1A/TFIP11/TRA2B/SF3B2/TXNL4A/PRPF4/DDX39B/METTL3/SNRPC/DAZAP1/LSM5/LSM2/METTL14/CDC5L/PRDX6/MAGOH/SRSF1/RBM8A/SF1/CWC15/SON/ZMAT2/PRPF19/LUC7L/SF3B…	77
C2a	GO:0000398	mRNA splicing, via spliceosome	77/2608	148/8043	5.08239e-07	4.74487e-05	4.58993e-05	LSM3/RBM25/RBM39/RBM14/BUD31/SRSF2/CCDC94/GEMIN5/ZC3H10/RBM17/RBM5/PRPF31/SNRPD1/U2AF1L4/PRPF40A/PSIP1/SF3A3/USP39/GEMIN6/EIF4A3/DDX20/HNRNPM/STRAP/DHX16/SNRPD3/CDC40/HNRNPA1/MFAP1/PTBP1/RBM4B/SLU7/RBM7/SF3B5/TRA2A/DCPS/SRSF6/PRPF38B/SFSWAP/SRSF12/CLNS1A/TFIP11/TRA2B/SF3B2/TXNL4A/PRPF4/DDX39B/METTL3/SNRPC/DAZAP1/LSM5/LSM2/METTL14/CDC5L/PRDX6/MAGOH/SRSF1/RBM8A/SF1/CWC15/SON/ZMAT2/PRPF19/LUC7L/SF3B…	77
C2a	GO:0042255	ribosome assembly	21/2608	26/8043	5.31792e-07	4.84064e-05	4.68257e-05	RPL23A/MRPL20/RRS1/EIF6/SBDS/RPS28/MRTO4/RPL6/RPS27L/DDX28/MTERF3/RSL24D1/ABT1/RPS15/NIP7/FASTKD2/RPS27/RPSA/MRPS11/PPAN/RPLP0	21
C2a	GO:0034622	cellular protein-containing complex assembly	166/2608	376/8043	7.61364e-07	6.76128e-05	6.54049e-05	CDC42EP4/RPL23A/MID1IP1/CDKN1B/GTF2B/SLAIN2/MSRB1/SCO2/GRWD1/FMC1/CENPO/DNAAF5/CARMIL1/CALR/MRPL20/NDUFAF3/CCDC94/PFDN6/TAF11/GEMIN5/WHAMM/HIST1H2BD/RRS1/TARBP2/TIMM21/CAPZA1/PRPF31/UBN1/SNRPD1/TPPP3/NUFIP1/EIF6/CCDC115/PSMD4/RPS28/PSIP1/NAP1L1/DNAI2/TBX20/TUBGCP3/TWF2/ARPC5L/AP1AR/FAM206A/HEY2/USP39/RPL38/NDUFA11/GEMIN6/EIF3K/DDX20/LOC100738859/STRAP/ARFGEF1/SNRPD3/DNAAF2/HIGD1A/CLP1/DENR/PSMG4/…	166
C2a	GO:0042274	ribosomal small subunit biogenesis	24/2608	32/8043	9.32674e-07	8.0854e-05	7.82137e-05	FAM207A/KRI1/RRS1/NOL11/HELB/TSR3/RPS28/RPS25/RPS6/NOB1/DDX52/RPS27L/NOP9/ABT1/RPS7/RPS15/NAT10/RPS16/RPS27/RPSA/RPS21/MRPS11/UTP6/RPS8	24
C2a	GO:0043161	proteasome-mediated ubiquitin-dependent protein catabolic process	71/2608	137/8043	1.69529e-06	0.000143547	0.00013886	TRIM9/UBE2J2/PSEN1/WAC/PSMB5/TNFAIP1/PSMB9/TRIM39/KCTD10/NSFL1C/CCNF/HSP90B1/SUMO2/PSMB11/FBXL20/PSMD1/PLK3/YOD1/PSMD4/SPOP/UBE2K/PSMB7/STT3B/PSMA3/PSMB3/FBXO33/PSMB1/PSMA5/SELENOS/RAD23B/EDEM2/WWP1/UBE2B/NEMF/PSMC5/VCP/UBQLN4/ERCC8/UBXN2A/FBXL12/SIAH2/ANAPC10/DDRGK1/PSMA1/RACK1/FAF2/DNAJB9/UBXN4/BAG6/TOPORS/USP44/N4BP1/RNF122/CUL5/FBXO4/RPL11/FBXO38/STYX/PSMC6/STUB1/PSMB6/KCTD5/DNAJB12/DERL3/TAF…	71
C2a	GO:0072594	establishment of protein localization to organelle	65/2608	123/8043	1.92417e-06	0.000159225	0.000154026	PSEN1/TIMM29/MAPK14/CHCHD4/SPCS2/SEC61A2/RAB11A/ATPIF1/SMO/ZPR1/TIMM21/TIMM22/MON1B/WRAP53/NUTF2/CCT3/NABP2/SEC63/TOMM7/PEX14/TOMM20/SEC61G/SRP54/SCARB2/PEX13/HIKESHI/KPNA5/ELAVL1/SSR3/PEX12/PEX26/MX1/TNPO2/KPNB1/PTTG1IP/LAMP5/STAT3/APPL1/TOMM40/SNX16/IPO8/IPO13/PHB2/TGFB1/LOC100157391/PEX6/VPS36/MAIP1/SRP68/TRAM1/SRP14/AIP/SPCS1/PEX19/IPO4/SRP9/TOMM34/TNPO3/NXT1/CCT6A/PMPCB/SNUPN/CCT4/TIMM44/VPS…	65
C2a	GO:0000723	telomere maintenance	28/2608	41/8043	2.5943e-06	0.000205345	0.000198639	TINF2/XRCC3/HMBOX1/WRAP53/TERF2IP/CCT3/NABP2/ATM/TNKS/HNRNPA1/RAD51/PTGES3/SMC6/DCLRE1A/NAF1/TEN1/GAR1/RPA1/YLPM1/ZNF365/NAT10/ORAOV1/DCLRE1B/FBXO4/TERF1/CCT6A/TPRKB/CCT4	28
C2a	GO:0032200	telomere organization	28/2608	41/8043	2.5943e-06	0.000205345	0.000198639	TINF2/XRCC3/HMBOX1/WRAP53/TERF2IP/CCT3/NABP2/ATM/TNKS/HNRNPA1/RAD51/PTGES3/SMC6/DCLRE1A/NAF1/TEN1/GAR1/RPA1/YLPM1/ZNF365/NAT10/ORAOV1/DCLRE1B/FBXO4/TERF1/CCT6A/TPRKB/CCT4	28
C2a	GO:1903047	mitotic cell cycle process	97/2608	205/8043	5.00972e-06	0.000388093	0.00037542	RGCC/CDKN1B/GINS1/BCL2L1/WDR62/CCNO/KLF11/XRCC3/SPRY2/WRAP73/TRIM39/CDKN2D/CEP55/NSFL1C/RTFDC1/RAB11A/RAE1/CCSAP/CCNA1/RRS1/ZPR1/KIF11/RAD21/CCNG1/TACC3/NABP2/PLK3/SBDS/PSME3/BUB3/PKD2/ATM/DMRT1/TNKS/AURKA/RPS6/BIRC5/CENPH/RAD51/MZT1/CHMP5/CDKN2C/GEN1/CHEK1/CCNB1/DRG1/SPRY1/DLGAP5/CDC25C/TGFA/SPAST/CDK1/RFWD3/VPS4B/APPL1/MIIP/CCNB2/POGZ/CKS2/VCP/TAOK1/PHB2/CCNI/CENPA/AURKB/SMC3/INTS3/USP16/FBXL12…	97
C2a	GO:0051276	chromosome organization	161/2608	374/8043	6.88979e-06	0.000522619	0.000505553	ZBTB1/HHEX/OTUB1/TINF2/TSSK6/WAC/ENY2/ING2/GRWD1/CENPO/RBM14/MSL2/XRCC3/MYOCD/BCL6/HMBOX1/RAB11A/RAE1/RIOX1/MSL1/HIST1H2BD/RRS1/RAD21/ASH2L/GPX4/DEK/WRAP53/BRMS1L/TP53/PRMT1/UBN1/MORC2/RNF8/TERF2IP/CCT3/NABP2/NAP1L1/MORF4L1/KDM1A/L3MBTL2/SRCAP/BUB3/SMARCB1/LOC100153329/ACTR6/LOC100622387/LOC100738859/ATM/DR1/LOC106510170/SMC4/KAT2A/CHTOP/TNKS/LIG4/KDM3A/HMGN2/TOP2A/SERTAD1/OIP5/HNRNPA1/BIRC5/CENP…	161
C2a	GO:0006403	RNA localization	33/2608	53/8043	7.41363e-06	0.000550878	0.00053289	HHEX/IGF2BP1/ENY2/RAE1/RRS1/NUP85/WRAP53/EIF6/DDX19B/TOMM20/EIF4A3/CHTOP/MRPL18/SIDT2/HNRNPA1/FYTTD1/EIF5A/EXOSC3/NOP9/HNRNPA2B1/AKAP8L/GLE1/SLBP/DDX39B/SSB/NOL6/C5H12orf50/SDAD1/RBM8A/THOC3/NXT1/SNUPN/CCT4	33
C2a	GO:0022402	cell cycle process	163/2608	380/8043	7.7407e-06	0.000563678	0.000545271	RGCC/CDKN1B/GINS1/BCL2L1/WDR62/CCNO/CFL1/ING2/KLF11/RBM14/CEP152/XRCC3/SPRY2/WRAP73/TRIM39/CDKN2D/CALR/CEP55/CCP110/NSFL1C/RTFDC1/RAB11A/RAE1/CCSAP/CCNA1/WHAMM/CCNF/RRS1/ATF5/ZPR1/KIF11/RAD21/CCNG1/TACC3/NABP2/XRCC2/PRPF40A/BECN1/PLK3/SBDS/WNT5A/TUBGCP3/P14ARF/TXLNG/PSME3/NKX3-1/BUB3/PKD2/RMI1/UBB/ATM/DMRT1/HAUS6/KAT2A/TNKS/PARD6G/AURKA/RPS6/TOP2A/IRF1/ANXA11/BIRC5/CENPH/RAD51/MZT1/CHMP5/CDKN2C/G…	163
C2a	GO:0006261	DNA-dependent DNA replication	27/2608	41/8043	1.12325e-05	0.000801909	0.000775723	GINS1/POLG/RTFDC1/ZPR1/HELB/GMNC/RAD51/GEN1/MCMBP/GINS4/E2F8/RFWD3/TIPIN/DDX21/RFC4/WDR18/INO80/ZNF365/CDC45/BAZ1A/MCM2/GINS3/E2F7/POLE2/DONSON/MCM3/BOD1L1	27
C2a	GO:0006310	DNA recombination	51/2608	95/8043	1.35716e-05	0.000950274	0.000919243	HDAC10/XRCC3/GINS2/BCL6/PARPBP/RAD21/SWSAP1/WRAP53/STAT6/CD40/HELB/XRCC4/TERF2IP/NABP2/XRCC2/THAP9/MORF4L1/RMI1/LIG4/RNF138/TOP2A/SLC15A4/RAD51/GEN1/SMC6/RFWD3/UBE2B/SWAP70/TEX15/PSMC3IP/UBQLN4/EXOSC3/RPA1/TGFB1/MSH6/INO80/ZNF365/RUVBL2/UCHL5/NSMCE4A/HMGB2/RMI2/ACTR8/APEX1/RPA2/SPO11/MB21D1/MCM3/TPRKB/PALB2/MND1	51
C2a	GO:0050657	nucleic acid transport	30/2608	48/8043	1.73095e-05	0.00114589	0.00110847	HHEX/IGF2BP1/ENY2/RAE1/RRS1/NUP85/EIF6/DDX19B/TOMM20/EIF4A3/CHTOP/MRPL18/SIDT2/HNRNPA1/FYTTD1/EIF5A/NOP9/HNRNPA2B1/AKAP8L/GLE1/SLBP/DDX39B/SSB/NOL6/C5H12orf50/SDAD1/RBM8A/THOC3/NXT1/SNUPN	30
C2a	GO:0050658	RNA transport	30/2608	48/8043	1.73095e-05	0.00114589	0.00110847	HHEX/IGF2BP1/ENY2/RAE1/RRS1/NUP85/EIF6/DDX19B/TOMM20/EIF4A3/CHTOP/MRPL18/SIDT2/HNRNPA1/FYTTD1/EIF5A/NOP9/HNRNPA2B1/AKAP8L/GLE1/SLBP/DDX39B/SSB/NOL6/C5H12orf50/SDAD1/RBM8A/THOC3/NXT1/SNUPN	30
C2a	GO:0051236	establishment of RNA localization	30/2608	48/8043	1.73095e-05	0.00114589	0.00110847	HHEX/IGF2BP1/ENY2/RAE1/RRS1/NUP85/EIF6/DDX19B/TOMM20/EIF4A3/CHTOP/MRPL18/SIDT2/HNRNPA1/FYTTD1/EIF5A/NOP9/HNRNPA2B1/AKAP8L/GLE1/SLBP/DDX39B/SSB/NOL6/C5H12orf50/SDAD1/RBM8A/THOC3/NXT1/SNUPN	30
C2a	GO:0002183	cytoplasmic translational initiation	13/2608	15/8043	2.21025e-05	0.00143706	0.00139013	EIF4A2/EIF3K/DENR/EIF4A1/EIF4H/EIF3H/EIF2S2/METTL3/EIF3M/LOC100738684/EIF3J/EIF3I/EIF3A	13
C2a	GO:0006302	double-strand break repair	44/2608	80/8043	2.36325e-05	0.00150958	0.00146029	OTUB1/XRCC3/GINS2/PARPBP/RAD21/SWSAP1/DEK/WRAP53/HELB/XRCC4/RNF8/TERF2IP/NABP2/XRCC2/MORF4L1/RMI1/LIG4/RNF138/TDP1/RAD51/GEN1/PARP2/BRCC3/DCLRE1A/RFWD3/TEX15/VCP/UBQLN4/ERCC8/APTX/APLF/RPA1/INO80/ZNF365/DCLRE1B/HMGB2/RMI2/FH/FOXM1/PRPF19/SPO11/MB21D1/MCM3/PALB2	44
C2a	GO:0071166	ribonucleoprotein complex localization	19/2608	26/8043	2.49575e-05	0.00156673	0.00151557	HHEX/ENY2/RAE1/RRS1/PRPF31/EIF6/DDX19B/CHTOP/FYTTD1/NOP9/HNRNPA2B1/AKAP8L/GLE1/DDX39B/SSB/NOL6/C5H12orf50/SDAD1/THOC3	19
C2a	GO:0009451	RNA modification	42/2608	76/8043	3.09087e-05	0.00190743	0.00184515	ELP2/MRM2/CMTR1/MTFMT/MOCS3/DNAJB11/TSR3/ELP1/PUSL1/NSUN5/NHP2/ADAD2/QTRT1/FTO/NAF1/ELP6/TYW3/LOC100524391/GAR1/THUMPD1/EMG1/ADAT2/FTSJ3/RBM47/PUS3/NAT10/METTL3/TYW5/FAM103A1/BUD23/BCDIN3D/DIMT1/RPUSD1/APOBEC2/OSGEP/PUS1/TRMT6/WTAP/TPRKB/ELP5/MTO1/URM1	42
C2a	GO:0006401	RNA catabolic process	47/2608	89/8043	5.09024e-05	0.00308893	0.00298806	CNOT9/LSM3/FAM46A/IGF2BP1/RNASEH2A/CNOT8/EDC3/LIN28A/ZPR1/ETF1/SKIV2L2/LSM1/EIF4A3/ATM/CTIF/SIDT2/DCP2/ELAVL1/PABPC4/PDE12/NAF1/SMG9/C2H19orf43/POP1/DCPS/CARHSP1/PAN2/EXOSC3/DND1/SSB/LSM2/FASTKD2/METTL14/DCP1B/MAGOH/RBM8A/PNPT1/EDC4/FEN1/RNASEH1/MAGOHB/DXO/PUM2/SKIV2L/RNASEH2C/ANGEL2/PELO	47
C2a	GO:0030490	maturation of SSU-rRNA	17/2608	23/8043	5.36974e-05	0.00318885	0.00308472	FAM207A/KRI1/RRS1/NOL11/HELB/TSR3/RPS28/NOB1/DDX52/NOP9/ABT1/NAT10/RPS16/RPS21/MRPS11/UTP6/RPS8	17
C2a	GO:0017038	protein import	34/2608	59/8043	5.54929e-05	0.00318885	0.00308472	PSEN1/MAPK14/CHCHD4/SMO/ZPR1/TIMM21/NUTF2/TOMM7/PEX14/TOMM20/PEX13/HIKESHI/KPNA5/ELAVL1/PEX12/PEX26/TNPO2/KPNB1/PTTG1IP/STAT3/APPL1/TOMM40/IPO8/IPO13/PHB2/TGFB1/LOC100157391/PEX6/PEX19/IPO4/TNPO3/NXT1/SNUPN/TIMM44	34
C2a	GO:0010833	telomere maintenance via telomere lengthening	18/2608	25/8043	5.70151e-05	0.00318885	0.00308472	TINF2/HMBOX1/WRAP53/TERF2IP/CCT3/TNKS/HNRNPA1/RAD51/PTGES3/NAF1/TEN1/GAR1/NAT10/DCLRE1B/FBXO4/TERF1/CCT6A/CCT4	18
C2a	GO:0071426	ribonucleoprotein complex export from nucleus	18/2608	25/8043	5.70151e-05	0.00318885	0.00308472	HHEX/ENY2/RAE1/RRS1/EIF6/DDX19B/CHTOP/FYTTD1/NOP9/HNRNPA2B1/AKAP8L/GLE1/DDX39B/SSB/NOL6/C5H12orf50/SDAD1/THOC3	18
C2a	GO:1901565	organonitrogen compound catabolic process	194/2608	477/8043	5.83348e-05	0.00318885	0.00308472	FOXO1/BCKDHA/NT5M/ADRA2A/TRIM9/PSMC1/USP37/PGLYRP1/MYLIP/UBE2J2/PSEN1/RNF114/WAC/PSMB5/TNFAIP1/PSMB9/RNF41/TRIM39/KCTD10/UBE3B/C1H18orf25/ATE1/UBE3A/NSFL1C/ALDH1L2/RNF13/ATPIF1/CCNF/RBBP6/USP18/HAMP/HEXB/SCARB1/RNF125/GOT2/EXT1/HSP90B1/SUMO2/GCAT/ENC1/GGT7/RHBDD3/PSMB11/FBXL20/NEU1/PSMD1/ALDH6A1/PLK3/MIB1/YOD1/PSMD4/SPOP/WNT5A/PSME3/PSMA6/UBB/SPATA18/UBE2K/RNFT2/PITHD1/PSMB7/STT3B/TIPARP/CTSW/NRD…	194
C2a	GO:0006405	RNA export from nucleus	19/2608	27/8043	5.86166e-05	0.00318885	0.00308472	HHEX/ENY2/RAE1/RRS1/EIF6/DDX19B/CHTOP/FYTTD1/NOP9/HNRNPA2B1/AKAP8L/GLE1/DDX39B/SSB/NOL6/C5H12orf50/SDAD1/THOC3/NXT1	19
C2a	GO:0051726	regulation of cell cycle	145/2608	343/8043	5.92816e-05	0.00318885	0.00308472	RGCC/HHEX/CDKN1B/BCL2L1/CCNO/SLC9A3R1/WAC/CDK10/MAPK14/RBM14/XRCC3/TRIM39/CDKN2D/CALR/PRCC/CCP110/NSFL1C/RB1/RAB11A/RAE1/CCSAP/CCNA1/WHAMM/TRNP1/CCNF/ATF5/KIF11/RAD21/JUN/CCNYL1/CCNG1/GADD45A/THAP1/NABP2/PRPF40A/BECN1/PLK3/CRY1/RAD9B/WNT5A/P14ARF/TXLNG/PSME3/CCNG2/GTPBP4/NKX3-1/BUB3/PKD2/CABLES2/ATM/DMRT1/KAT2A/APP/TNKS/AURKA/BTG3/STOX1/GMNC/IRF1/BIRC5/CHMP5/CDKN2C/GEN1/CHEK1/CCNB1/DRG1/CDK7/BRCC…	145
C2a	GO:2000059	negative regulation of ubiquitin-dependent protein catabolic process	12/2608	14/8043	5.95555e-05	0.00318885	0.00308472	PSEN1/WAC/TRIM39/DDRGK1/RPL23/BAG6/N4BP1/PDCL3/RPL11/STYX/TAF9/PARK7	12
C2a	GO:0006457	protein folding	49/2608	95/8043	7.84953e-05	0.00408288	0.00394955	HSPB6/HSPE1/HSPD1/PPIA/CHCHD4/TBCC/CALR/PFDN6/HSP90B1/DNAJA3/CDC37/DNAJB11/PPIG/PFDN4/VBP1/LOC100511376/CCT2/PFDN5/HSPA9/DFFA/PTGES3/CCT8/NKTR/NUDCD3/AHSA1/HSP90AA1/DNAJA4/HSPA6/CLGN/PPIL3/PFDN1/CNP/DNAJB1/MESDC2/PPIE/PPIF/AIP/PDCL3/PFDN2/CALR3/DNAJB2/PPIL6/PPIL1/ERO1A/DNAJB12/CCT6A/CCT4/PPIC/TOR1A	49
C2a	GO:0048193	Golgi vesicle transport	49/2608	95/8043	7.84953e-05	0.00408288	0.00394955	STX10/BNIP1/LMAN2/WHAMM/ARCN1/COPB2/TRAPPC1/CEP19/AP1AR/TRAPPC4/RAB1A/SNX2/CREB3L2/GOSR1/YIF1A/BET1L/TRAPPC2L/TMED1/TRAPPC5/GOPC/TRAPPC6B/SPAST/SEC23B/RAB8B/COPZ1/ERGIC1/TMEM115/GOLGA7/YIPF5/TMED5/RACK1/SYS1/COPE/USO1/YIF1B/PREB/RAB1B/BLZF1/TMED10/COPA/TBC1D20/TRAPPC3/COPB1/VPS51/SAR1B/TMED7/ARFGAP2/TMED9/SEC23A	49
C2a	GO:0006605	protein targeting	40/2608	74/8043	9.24347e-05	0.00474021	0.00458542	TIMM29/CHCHD4/SPCS2/SEC61A2/ATPIF1/TIMM21/TIMM22/MON1B/HAP1/SEC63/TOMM7/PEX14/TOMM20/SEC61G/SRP54/SLC1A1/ZDHHC6/SCARB2/PEX13/SSR3/PEX12/PEX26/TOMM40/SNX16/GOLGA7/LOC100157391/PEX6/PIKFYVE/SRP68/TRAM1/SRP14/AIP/SPCS1/PEX19/INPP5K/SRP9/TOMM34/ZDHHC23/PMPCB/TIMM44	40
C2a	GO:0006413	translational initiation	23/2608	36/8043	0.000102643	0.00519061	0.00502111	EIF2S1/EIF4A2/KLHL25/DHX29/EIF4EBP2/EIF3K/CTIF/DENR/EIF2A/PAIP1/EIF4A1/EIF4H/EIF3H/EIF4EBP1/EIF2S2/PAIP2B/GLE1/METTL3/EIF3M/LOC100738684/EIF3J/EIF3I/EIF3A	23
C2a	GO:0006275	regulation of DNA replication	16/2608	22/8043	0.000124084	0.00602386	0.00582716	RBBP6/GTPBP4/GMNC/PCNA/ESCO1/E2F8/TIPIN/SMC3/RFC4/WDR18/INO80/GMNN/TERF1/EREG/E2F7/DONSON	16
C2a	GO:0065002	intracellular protein transmembrane transport	16/2608	22/8043	0.000124084	0.00602386	0.00582716	CHCHD4/SEC61A2/TIMM21/SEC63/TOMM7/PEX14/TOMM20/SEC61G/SRP54/PEX13/PEX12/TOMM40/LOC100157391/PEX6/TRAM1/TIMM44	16
C2a	GO:0071806	protein transmembrane transport	16/2608	22/8043	0.000124084	0.00602386	0.00582716	CHCHD4/SEC61A2/TIMM21/SEC63/TOMM7/PEX14/TOMM20/SEC61G/SRP54/PEX13/PEX12/TOMM40/LOC100157391/PEX6/TRAM1/TIMM44	16
C2a	GO:0034655	nucleobase-containing compound catabolic process	62/2608	131/8043	0.000244665	0.0117214	0.0113386	NT5M/CNOT9/LSM3/FAM46A/IGF2BP1/RNASEH2A/CNOT8/EDC3/LIN28A/ZPR1/ETF1/SKIV2L2/LSM1/EIF4A3/ATM/CTIF/SAMHD1/SIDT2/DCP2/ITPA/ELAVL1/FITM2/DFFA/PABPC4/NUDT7/PDE12/NAF1/SMG9/C2H19orf43/POP1/DCPS/NUDT4/CARHSP1/HINT1/PAN2/DCTPP1/EXOSC3/SMPDL3A/CNP/DND1/SSB/LSM2/FASTKD2/METTL14/DCP1B/NUDT3/MAGOH/ADAL/RBM8A/PNPT1/DUT/EDC4/FEN1/RNASEH1/ENDOG/MAGOHB/DXO/PUM2/SKIV2L/RNASEH2C/ANGEL2/PELO	62
C2a	GO:0044772	mitotic cell cycle phase transition	52/2608	106/8043	0.000253298	0.0119774	0.0115863	RGCC/CDKN1B/CCNO/KLF11/XRCC3/TRIM39/CDKN2D/RAB11A/CCNA1/ZPR1/RAD21/CCNG1/NABP2/PLK3/PSME3/BUB3/PKD2/ATM/RPS6/BIRC5/CDKN2C/GEN1/CHEK1/CCNB1/CDC25C/SPAST/CDK1/RFWD3/VPS4B/APPL1/MIIP/CCNB2/CKS2/TAOK1/PHB2/CCNI/AURKB/INTS3/FBXL12/PLK2/INO80/MAD2L1BP/ANAPC15/ENSA/RPL26/USP44/KDM8/FOXM1/E2F7/MAD2L1/SPDL1/DONSON	52
C2a	GO:0000724	double-strand break repair via homologous recombination	25/2608	42/8043	0.000266045	0.0122617	0.0118613	XRCC3/GINS2/PARPBP/RAD21/SWSAP1/WRAP53/HELB/TERF2IP/NABP2/XRCC2/MORF4L1/RMI1/RNF138/RAD51/GEN1/RFWD3/TEX15/UBQLN4/RPA1/INO80/ZNF365/RMI2/MB21D1/MCM3/PALB2	25
C2a	GO:0000725	recombinational repair	25/2608	42/8043	0.000266045	0.0122617	0.0118613	XRCC3/GINS2/PARPBP/RAD21/SWSAP1/WRAP53/HELB/TERF2IP/NABP2/XRCC2/MORF4L1/RMI1/RNF138/RAD51/GEN1/RFWD3/TEX15/UBQLN4/RPA1/INO80/ZNF365/RMI2/MB21D1/MCM3/PALB2	25
C2a	GO:0032435	negative regulation of proteasomal ubiquitin-dependent protein catabolic process	9/2608	10/8043	0.000278294	0.0126658	0.0122522	WAC/TRIM39/DDRGK1/BAG6/N4BP1/RPL11/STYX/TAF9/PARK7	9
C2a	GO:0070925	organelle assembly	119/2608	283/8043	0.000345436	0.0155276	0.0150205	LSM3/RPL23A/RAB34/PSEN1/WDR62/CCNO/IFT20/DNAAF5/RBM14/DYNLL2/CEP152/WRAP73/EIF2S1/EDC3/RAB33B/MRPL20/ATG13/CCP110/NSFL1C/RAB11A/CCSAP/RRS1/KIF11/HAP1/RILPL1/LGR5/EIF6/BECN1/SBDS/TMEM107/CEP19/RPS28/ZPBP2/WIPI2/DDX6/DNAI2/TUBGCP3/ATG5/FNBP1L/PRKAA2/BBIP1/TCTN3/HAUS6/KAT2A/DNAAF2/TNKS/EIF2A/LSM14A/RAB1A/RAB32/GMNC/CFAP20/ATG14/TMOD3/CENPH/FITM2/TMEM216/MZT1/SQLE/MRTO4/CHMP5/TMEM41B/DRG1/RPL6/ATG12/…	119
C2a	GO:0070647	protein modification by small protein conjugation or removal	127/2608	305/8043	0.000360311	0.0159987	0.0154763	SOCS2/USP37/OTUB1/SAE1/PSEN1/RNF114/WAC/ENY2/EGR1/TNFAIP1/KLHL21/PPIA/MSL2/KLHL15/RNF41/TRIM15/COPS4/SPRY2/TRIM39/COPS9/KCTD10/UBE3B/FBXO32/UBE3A/MINDY1/UBE2D2/MOCS3/CCNF/SOCS7/JOSD2/USP18/ASB3/KLHL25/RNF125/SUMO2/ENC1/RNF8/COPS6/MIB1/DTX4/YOD1/CRY1/SPOP/GTPBP4/USP39/UBB/UBE2K/KAT2A/TNKS/RNF138/FBXO11/ASB6/DCAF11/KEAP1/TRIM62/RNF11/SOCS3/RNF26/PEX12/SENP7/FBXO5/VHL/BAG2/BRCC3/TRAF2/SOCS1/RNF7/USP…	127
C2a	GO:0051640	organelle localization	73/2608	161/8043	0.000374115	0.0162312	0.0157012	STX16/PSEN1/PDZD8/SLC9A3R1/CFL1/IFT20/SPRY2/NSFL1C/RAB11A/STXBP1/RRS1/MAP4K2/HAP1/EIF6/CEP19/AP1AR/FNBP1L/DYNC1LI2/UBB/RAB10/BLOC1S5/RAB1A/PEX13/ATG14/BIRC5/GOSR1/CHMP5/CCNB1/MX1/SPRY1/DLGAP5/SPAST/TESK1/RAB8B/UBE2B/VPS4B/C5H12orf4/UCHL1/VPS18/RAB3C/CENPA/NOP9/PDCD10/KIF2B/RAB3A/ATP2A2/MTOR/ACTR10/MFN1/POLR2M/SDAD1/VPS11/PREB/IKBKG/RAB1B/TMED10/TMEM201/SNAPIN/BICD1/BLOC1S3/TERF1/TMEM55B/SAR1B/FAM…	73
C2a	GO:0000226	microtubule cytoskeleton organization	89/2608	203/8043	0.000374463	0.0162312	0.0157012	MID1IP1/CDKN1B/SLAIN2/WDR62/CFL1/FGFR1OP/DNAAF5/RBM14/CEP152/STMN1/XRCC3/SPRY2/WRAP73/CCP110/NSFL1C/RAB11A/RAE1/CCSAP/CCNF/ATF5/ZPR1/KIF11/TACC3/TPPP3/TUBB/XRCC2/PLK3/SBDS/CEP19/DNAI2/TUBGCP3/DYNC1LI2/PRKAA2/HAUS6/KAT2A/DNAAF2/TNKS/PARD6G/LOC100510930/AURKA/SKA1/TUBA4A/BIRC5/CENPH/MZT1/CHMP5/GEN1/CCNB1/DRG1/SPRY1/DLGAP5/MAPRE1/SPAST/C12H17orf105/CDK1/UBE2B/GAPDH/VPS4B/BBS1/CCNB2/VCP/TAOK1/CENPA/A…	89
C2a	GO:0000027	ribosomal large subunit assembly	10/2608	12/8043	0.000418376	0.0179212	0.017336	RPL23A/MRPL20/RRS1/MRTO4/RPL6/DDX28/RSL24D1/FASTKD2/PPAN/RPLP0	10
C2a	GO:0006611	protein export from nucleus	25/2608	43/8043	0.000441203	0.0186652	0.0180557	HHEX/ENY2/CALR/RAE1/RRS1/EIF6/DDX19B/CHTOP/HSPA9/FYTTD1/TGFB1/NOP9/HNRNPA2B1/AKAP8L/GLE1/DDX39B/SSB/NOL6/C5H12orf50/SDAD1/PTPN11/STYX/THOC3/NXT1/PARK7	25
C2a	GO:0007059	chromosome segregation	52/2608	108/8043	0.000451122	0.0186652	0.0180557	XRCC3/PPP2R1A/RAB11A/RRS1/RAD21/BUB3/RMI1/ATM/CIAO1/TNKS/TOP2A/SKA1/OIP5/BIRC5/CENPH/CHMP5/GEN1/CCNB1/SMC6/MCMBP/ESCO1/DLGAP5/UBE2B/VPS4B/POGZ/TEX15/PHB2/AURKB/SMC3/SPAG5/AKAP8L/INO80/KIF2B/MAD2L1BP/KNSTRN/BAG6/ANAPC15/USP44/RMI2/PTTG1/PMF1/FEN1/TERF1/CHMP1A/HJURP/MAD2L1/CENPQ/SPO11/SPDL1/PUM2/NCAPH2/CDC20	52
C2a	GO:0051656	establishment of organelle localization	52/2608	108/8043	0.000451122	0.0186652	0.0180557	PSEN1/SLC9A3R1/CFL1/SPRY2/NSFL1C/RAB11A/RRS1/MAP4K2/HAP1/EIF6/CEP19/AP1AR/FNBP1L/UBB/BLOC1S5/RAB1A/BIRC5/GOSR1/CHMP5/CCNB1/MX1/SPRY1/SPAST/TESK1/UBE2B/VPS4B/C5H12orf4/UCHL1/CENPA/NOP9/PDCD10/KIF2B/ACTR10/SDAD1/PREB/IKBKG/RAB1B/TMED10/TMEM201/SNAPIN/BICD1/BLOC1S3/TERF1/SAR1B/MAD2L1/CENPQ/SPO11/SPDL1/ARFGAP2/FES/TMED9/TOR1A	52
C2a	GO:0051052	regulation of DNA metabolic process	47/2608	96/8043	0.000521943	0.0213527	0.0206555	OTUB1/TINF2/HDAC10/BCL6/HMBOX1/PARPBP/DEK/WRAP53/STAT6/CD40/HELB/RNF8/TERF2IP/CCT3/NABP2/DNAJC2/TNKS/SLC15A4/TIGAR/HNRNPA1/RAD51/DFFA/PTGES3/BRCC3/NAF1/UBE2B/TEX15/TEN1/UBQLN4/EXOSC3/TGFB1/YLPM1/RFC4/WDR18/MSH6/ZNF365/NAT10/MPHOSPH8/HMGB2/RMI2/FH/FBXO4/TERF1/FOXM1/CCT6A/MB21D1/CCT4	47
C2a	GO:1903051	negative regulation of proteolysis involved in cellular protein catabolic process	12/2608	16/8043	0.000589496	0.0238484	0.0230696	PSEN1/WAC/TRIM39/DDRGK1/RPL23/BAG6/N4BP1/PDCL3/RPL11/STYX/TAF9/PARK7	12
C2a	GO:0006913	nucleocytoplasmic transport	46/2608	94/8043	0.000603342	0.0238779	0.0230982	HHEX/PSEN1/ENY2/MAPK14/CALR/RAE1/SMO/RRS1/ZPR1/NUTF2/EIF6/DDX19B/CHTOP/HSPA9/HIKESHI/KPNA5/HNRNPA1/ELAVL1/FYTTD1/TNPO2/KPNB1/PTTG1IP/NEMF/STAT3/APPL1/IPO8/IPO13/PHB2/TGFB1/NOP9/HNRNPA2B1/AKAP8L/GLE1/DDX39B/SSB/NOL6/C5H12orf50/SDAD1/PTPN11/STYX/THOC3/IPO4/TNPO3/NXT1/SNUPN/PARK7	46
C2a	GO:0051169	nuclear transport	46/2608	94/8043	0.000603342	0.0238779	0.0230982	HHEX/PSEN1/ENY2/MAPK14/CALR/RAE1/SMO/RRS1/ZPR1/NUTF2/EIF6/DDX19B/CHTOP/HSPA9/HIKESHI/KPNA5/HNRNPA1/ELAVL1/FYTTD1/TNPO2/KPNB1/PTTG1IP/NEMF/STAT3/APPL1/IPO8/IPO13/PHB2/TGFB1/NOP9/HNRNPA2B1/AKAP8L/GLE1/DDX39B/SSB/NOL6/C5H12orf50/SDAD1/PTPN11/STYX/THOC3/IPO4/TNPO3/NXT1/SNUPN/PARK7	46
C2a	GO:2000278	regulation of DNA biosynthetic process	15/2608	22/8043	0.00062175	0.0243418	0.023547	TINF2/HMBOX1/WRAP53/CCT3/DNAJC2/TNKS/HNRNPA1/PTGES3/NAF1/TEN1/RFC4/NAT10/FBXO4/CCT6A/CCT4	15
C2a	GO:0015931	nucleobase-containing compound transport	33/2608	63/8043	0.00078566	0.0304318	0.0294381	HHEX/IGF2BP1/ENY2/RAE1/RRS1/NUP85/EIF6/DDX19B/TOMM20/EIF4A3/CHTOP/MRPL18/SLC35C1/SIDT2/HNRNPA1/FYTTD1/EIF5A/NOP9/HNRNPA2B1/AKAP8L/GLE1/SLBP/SLC25A33/DDX39B/SSB/NOL6/C5H12orf50/SLC25A4/SDAD1/RBM8A/THOC3/NXT1/SNUPN	33
C2a	GO:0007098	centrosome cycle	24/2608	42/8043	0.000808395	0.0309828	0.0299711	WDR62/RBM14/CEP152/XRCC3/CCP110/NSFL1C/CCNF/ATF5/KIF11/XRCC2/KAT2A/PARD6G/AURKA/CHMP5/GEN1/VPS4B/PLK2/NAT10/CHORDC1/HAUS1/PLK4/LOC100622849/FES/SAC3D1	24
C2a	GO:0051168	nuclear export	27/2608	49/8043	0.000842296	0.0319458	0.0309027	HHEX/ENY2/CALR/RAE1/RRS1/EIF6/DDX19B/CHTOP/HSPA9/HNRNPA1/FYTTD1/NEMF/TGFB1/NOP9/HNRNPA2B1/AKAP8L/GLE1/DDX39B/SSB/NOL6/C5H12orf50/SDAD1/PTPN11/STYX/THOC3/NXT1/PARK7	27
C2a	GO:0007051	spindle organization	32/2608	61/8043	0.000908036	0.0340841	0.0329711	WDR62/WRAP73/RAB11A/RAE1/CCSAP/KIF11/TACC3/SBDS/TUBGCP3/HAUS6/TNKS/AURKA/CENPH/MZT1/CHMP5/CCNB1/DRG1/DLGAP5/SPAST/CDK1/VPS4B/CCNB2/VCP/AURKB/SMC3/PLK2/INO80/HAUS1/KNSTRN/DCTN6/CDC20/SAC3D1	32
C2a	GO:0071897	DNA biosynthetic process	23/2608	40/8043	0.000919662	0.0341682	0.0330525	ZBTB1/TINF2/CDKN2D/HMBOX1/WRAP53/CCT3/DNAJC2/TNKS/LIG4/HNRNPA1/PTGES3/NAF1/VCP/TEN1/GAR1/RFC4/NAT10/FBXO4/TERF1/POLE2/POLDIP2/CCT6A/CCT4	23
C2a	GO:0044270	cellular nitrogen compound catabolic process	66/2608	147/8043	0.000964731	0.0351259	0.0339788	NT5M/CNOT9/LSM3/FAM46A/IGF2BP1/RNASEH2A/CNOT8/EDC3/ALDH1L2/LIN28A/ZPR1/ETF1/SKIV2L2/LSM1/ALDH6A1/EIF4A3/ATM/CTIF/SAMHD1/SIDT2/DCP2/ITPA/ELAVL1/FITM2/DFFA/PABPC4/NUDT7/PDE12/NAF1/SMG9/C2H19orf43/POP1/TET2/DCPS/NUDT4/CARHSP1/HINT1/PAN2/DCTPP1/EXOSC3/SMPDL3A/CNP/DND1/SSB/LSM2/FASTKD2/METTL14/DCP1B/NUDT3/MAGOH/ADAL/RBM8A/PNPT1/DUT/EDC4/FEN1/RNASEH1/ENDOG/MAGOHB/DXO/PUM2/SKIV2L/RNASEH2C/ANGEL2/PELO/QP…	66
C2a	GO:0046700	heterocycle catabolic process	66/2608	147/8043	0.000964731	0.0351259	0.0339788	NT5M/CNOT9/LSM3/FAM46A/IGF2BP1/RNASEH2A/CNOT8/EDC3/ALDH1L2/LIN28A/ZPR1/ETF1/SKIV2L2/LSM1/ALDH6A1/EIF4A3/ATM/CTIF/SAMHD1/SIDT2/DCP2/ITPA/ELAVL1/FITM2/DFFA/PABPC4/NUDT7/PDE12/NAF1/SMG9/C2H19orf43/POP1/TET2/DCPS/NUDT4/CARHSP1/HINT1/PAN2/DCTPP1/EXOSC3/SMPDL3A/CNP/DND1/SSB/LSM2/FASTKD2/METTL14/DCP1B/NUDT3/MAGOH/ADAL/RBM8A/PNPT1/DUT/EDC4/FEN1/RNASEH1/ENDOG/MAGOHB/DXO/PUM2/SKIV2L/RNASEH2C/ANGEL2/PELO/QP…	66
C2a	GO:0008033	tRNA processing	31/2608	59/8043	0.0010496	0.0378377	0.0366021	ELP2/MTFMT/MOCS3/ELP1/PUSL1/CLP1/QTRT1/RPP30/ELAC1/ZBTB8OS/ELP6/POP1/TYW3/THUMPD1/ADAT2/PUS3/SSB/NAT10/TRMT10B/TYW5/RPP38/RPP21/OSGEP/POP7/RTCB/PUS1/TRMT6/TPRKB/ELP5/MTO1/URM1	31
C2a	GO:0051053	negative regulation of DNA metabolic process	17/2608	27/8043	0.00106777	0.0381152	0.0368706	OTUB1/TINF2/BCL6/PARPBP/HELB/TERF2IP/DNAJC2/TNKS/HNRNPA1/DFFA/TEN1/UBQLN4/MSH6/NAT10/RMI2/TERF1/MB21D1	17
C2a	GO:0098813	nuclear chromosome segregation	42/2608	86/8043	0.00107873	0.0381327	0.0368875	XRCC3/RAB11A/RRS1/RAD21/BUB3/RMI1/ATM/TNKS/TOP2A/BIRC5/CHMP5/GEN1/CCNB1/MCMBP/ESCO1/UBE2B/VPS4B/POGZ/TEX15/PHB2/AURKB/SMC3/SPAG5/AKAP8L/INO80/KIF2B/MAD2L1BP/KNSTRN/BAG6/ANAPC15/USP44/RMI2/PTTG1/FEN1/TERF1/CHMP1A/MAD2L1/CENPQ/SPO11/SPDL1/NCAPH2/CDC20	42
C2a	GO:0032446	protein modification by small protein conjugation	103/2608	247/8043	0.00118269	0.0414057	0.0400536	SOCS2/OTUB1/SAE1/PSEN1/RNF114/WAC/EGR1/TNFAIP1/KLHL21/PPIA/MSL2/KLHL15/RNF41/TRIM15/SPRY2/TRIM39/COPS9/KCTD10/UBE3B/FBXO32/UBE3A/UBE2D2/MOCS3/CCNF/SOCS7/ASB3/KLHL25/RNF125/SUMO2/ENC1/RNF8/MIB1/DTX4/CRY1/SPOP/GTPBP4/UBB/UBE2K/TNKS/RNF138/FBXO11/ASB6/DCAF11/KEAP1/TRIM62/RNF11/SOCS3/RNF26/PEX12/FBXO5/VHL/BAG2/TRAF2/SOCS1/RNF7/DCAF13/CUL4A/PTTG1IP/ASB7/UBE2B/DCUN1D5/VCP/ERCC8/BCL10/MARCH3/RNF19B/TRIM…	103
C2a	GO:0016567	protein ubiquitination	93/2608	220/8043	0.00120599	0.0418192	0.0404536	SOCS2/OTUB1/PSEN1/RNF114/WAC/TNFAIP1/KLHL21/PPIA/MSL2/KLHL15/RNF41/TRIM15/SPRY2/TRIM39/KCTD10/UBE3B/FBXO32/UBE3A/UBE2D2/CCNF/SOCS7/ASB3/KLHL25/RNF125/ENC1/RNF8/MIB1/DTX4/CRY1/SPOP/GTPBP4/UBB/UBE2K/TNKS/RNF138/FBXO11/ASB6/DCAF11/KEAP1/TRIM62/RNF11/SOCS3/RNF26/PEX12/FBXO5/VHL/BAG2/TRAF2/SOCS1/RNF7/DCAF13/CUL4A/PTTG1IP/ASB7/UBE2B/DCUN1D5/VCP/ERCC8/BCL10/MARCH3/RNF19B/TRIM27/RACK1/CUL9/SUZ12/PELI3/DD…	93
C2a	GO:0010499	proteasomal ubiquitin-independent protein catabolic process	10/2608	13/8043	0.00128361	0.0440908	0.042651	PSMB9/ENC1/PSMB11/PSMB7/PSMA3/PSMB3/PSMB1/PSMA1/PSMB6/PSMA2	10
C2a	GO:0006278	RNA-dependent DNA biosynthetic process	14/2608	21/8043	0.00133178	0.0448982	0.0434321	TINF2/HMBOX1/WRAP53/CCT3/TNKS/HNRNPA1/PTGES3/TEN1/GAR1/NAT10/FBXO4/TERF1/CCT6A/CCT4	14
C2a	GO:0007004	telomere maintenance via telomerase	14/2608	21/8043	0.00133178	0.0448982	0.0434321	TINF2/HMBOX1/WRAP53/CCT3/TNKS/HNRNPA1/PTGES3/TEN1/GAR1/NAT10/FBXO4/TERF1/CCT6A/CCT4	14
C2a	GO:0044743	protein transmembrane import into intracellular organelle	11/2608	15/8043	0.00138444	0.0462455	0.0447353	CHCHD4/TIMM21/TOMM7/PEX14/TOMM20/PEX13/PEX12/TOMM40/LOC100157391/PEX6/TIMM44	11
C2a	GO:0006352	DNA-templated transcription, initiation	23/2608	41/8043	0.00145784	0.0482544	0.0466787	GTF2B/GTF3C4/TAF4B/TAF11/GTF3C1/TFAM/GTF2E2/FOSL1/HEY2/ERCC3/POLR2I/POLR3H/TBPL1/PSMC5/NCOA6/PSMC2/CCNH/SNAPC5/GTF2H5/BRF2/TAF7/GTF2F1/TAF9	23
C3	GO:0002323	natural killer cell activation involved in immune response	27/1779	33/8043	4.67041e-13	1.2543e-09	1.24293e-09	IFN-DELTA-8/IFN-ALPHAOMEGA/IFN-DELTA-7/IFN-ALPHA-1/LOC100155760/IFN-ALPHA-4/IFN-ALPHA-17/RAB27A/AP1G1/IFNK/IFN-OMEGA-4/IFN-OMEGA-5/IFN-OMEGA-6/IFNA1/IFNE/IFN-DELTA-2/IFN-DELTA-4/LOC100153325/IFN-DELTA-3/IFN-OMEGA-3/IFN-DELTA-5/IFN-ALPHA-13/IFN-ALPHA-9/IFN-DELTA-10/IFN-ALPHA-16/IFN-DELTA-11/IFN-DELTA-9	27
C3	GO:0007608	sensory perception of smell	25/1779	30/8043	1.59565e-12	1.2543e-09	1.24293e-09	LOC100510915/LOC100513516/LOC100620101/LOC100620388/LOC100152197/LOC100522928/LOC106509349/LOC100516632/LOC100524268/LOC100514671/LOC100516990/OMP/LOC100623188/LOC100152848/B3GNT2/LOC100524947/LOC100516454/LOC100624876/LOC100511466/LOC100511340/LOC100519942/LOC100519759/LOC100627167/LOC100515554/LOC100155752	25
C3	GO:0033139	regulation of peptidyl-serine phosphorylation of STAT protein	26/1779	32/8043	1.75035e-12	1.2543e-09	1.24293e-09	IFN-DELTA-8/IFN-ALPHAOMEGA/IFN-DELTA-7/IFNG/IFN-ALPHA-1/LOC100155760/IFN-ALPHA-4/IFN-ALPHA-17/IFNK/IFN-OMEGA-4/IFN-OMEGA-5/IFN-OMEGA-6/IFNA1/IFNE/IFN-DELTA-2/IFN-DELTA-4/LOC100153325/IFN-DELTA-3/IFN-OMEGA-3/IFN-DELTA-5/IFN-ALPHA-13/IFN-ALPHA-9/IFN-DELTA-10/IFN-ALPHA-16/IFN-DELTA-11/IFN-DELTA-9	26
C3	GO:0033141	positive regulation of peptidyl-serine phosphorylation of STAT protein	26/1779	32/8043	1.75035e-12	1.2543e-09	1.24293e-09	IFN-DELTA-8/IFN-ALPHAOMEGA/IFN-DELTA-7/IFNG/IFN-ALPHA-1/LOC100155760/IFN-ALPHA-4/IFN-ALPHA-17/IFNK/IFN-OMEGA-4/IFN-OMEGA-5/IFN-OMEGA-6/IFNA1/IFNE/IFN-DELTA-2/IFN-DELTA-4/LOC100153325/IFN-DELTA-3/IFN-OMEGA-3/IFN-DELTA-5/IFN-ALPHA-13/IFN-ALPHA-9/IFN-DELTA-10/IFN-ALPHA-16/IFN-DELTA-11/IFN-DELTA-9	26
C3	GO:0042501	serine phosphorylation of STAT protein	26/1779	32/8043	1.75035e-12	1.2543e-09	1.24293e-09	IFN-DELTA-8/IFN-ALPHAOMEGA/IFN-DELTA-7/IFNG/IFN-ALPHA-1/LOC100155760/IFN-ALPHA-4/IFN-ALPHA-17/IFNK/IFN-OMEGA-4/IFN-OMEGA-5/IFN-OMEGA-6/IFNA1/IFNE/IFN-DELTA-2/IFN-DELTA-4/LOC100153325/IFN-DELTA-3/IFN-OMEGA-3/IFN-DELTA-5/IFN-ALPHA-13/IFN-ALPHA-9/IFN-DELTA-10/IFN-ALPHA-16/IFN-DELTA-11/IFN-DELTA-9	26
C3	GO:0007606	sensory perception of chemical stimulus	34/1779	52/8043	2.44014e-11	1.45717e-08	1.44397e-08	RTP1/TAS2R60/LOC100510915/LOC100513516/LOC100620101/RTP2/TAS2R41/LOC100620388/LOC100152197/GNAT1/LOC100522928/LOC106509349/TAS2R7/LOC100516632/LOC100524268/TAS2R9/LOC100514671/LOC100516990/OMP/LOC100623188/LOC100152848/B3GNT2/LOC100524947/CD36/LOC100516454/LOC100624876/LOC100511466/LOC100511340/LOC100519942/LOC100522675/LOC100519759/LOC100627167/LOC100515554/LOC100155752	34
C3	GO:0030101	natural killer cell activation	32/1779	52/8043	9.49214e-10	4.85862e-07	4.81458e-07	IL23A/TICAM1/IFN-DELTA-8/PRDM1/IFN-ALPHAOMEGA/IFN-DELTA-7/IFN-ALPHA-1/LOC100155760/IFN-ALPHA-4/IFN-ALPHA-17/RAB27A/AP1G1/STAT5B/KLRK1/IFNK/IFN-OMEGA-4/IFN-OMEGA-5/IFN-OMEGA-6/IFNA1/IFNE/IFN-DELTA-2/IFN-DELTA-4/LOC100153325/IFN-DELTA-3/IFN-OMEGA-3/IFN-DELTA-5/IFN-ALPHA-13/IFN-ALPHA-9/IFN-DELTA-10/IFN-ALPHA-16/IFN-DELTA-11/IFN-DELTA-9	32
C3	GO:0043330	response to exogenous dsRNA	28/1779	43/8043	1.66284e-09	6.44951e-07	6.39106e-07	TICAM1/IFN-DELTA-8/IFN-ALPHAOMEGA/IFN-DELTA-7/IFN-ALPHA-1/LOC100155760/IFN-ALPHA-4/IFIT1/IFN-ALPHA-17/IFNK/IFN-OMEGA-4/IFN-OMEGA-5/IFN-OMEGA-6/IFNA1/IFNE/RALB/IFN-DELTA-2/IFN-DELTA-4/LOC100153325/IFN-DELTA-3/IFN-OMEGA-3/IFN-DELTA-5/IFN-ALPHA-13/IFN-ALPHA-9/IFN-DELTA-10/IFN-ALPHA-16/IFN-DELTA-11/IFN-DELTA-9	28
C3	GO:0046425	regulation of receptor signaling pathway via JAK-STAT	34/1779	58/8043	1.76933e-09	6.44951e-07	6.39106e-07	LEPR/IL26/PTK2B/IL23A/IL10RA/IFN-DELTA-8/IFN-ALPHAOMEGA/IFN-DELTA-7/IFNG/IFN-ALPHA-1/LOC100155760/IFN-ALPHA-4/IFN-ALPHA-17/IFNK/IFN-OMEGA-4/IFN-OMEGA-5/IFN-OMEGA-6/PRL/IFNA1/IFNE/IFN-DELTA-2/IFN-DELTA-4/JAK2/LOC100153325/IFN-DELTA-3/IFN-OMEGA-3/IL4/IFN-DELTA-5/IFN-ALPHA-13/IFN-ALPHA-9/IFN-DELTA-10/IFN-ALPHA-16/IFN-DELTA-11/IFN-DELTA-9	34
C3	GO:0050907	detection of chemical stimulus involved in sensory perception	15/1779	16/8043	1.80003e-09	6.44951e-07	6.39106e-07	RTP1/TAS2R60/LOC100510915/RTP2/TAS2R41/LOC100522928/TAS2R7/TAS2R9/LOC100152848/LOC100624876/LOC100511466/LOC100522675/LOC100627167/LOC100515554/LOC100155752	15
C3	GO:0043331	response to dsRNA	29/1779	46/8043	2.6059e-09	8.48812e-07	8.41119e-07	P2RX7/TICAM1/IFN-DELTA-8/IFN-ALPHAOMEGA/IFN-DELTA-7/IFN-ALPHA-1/LOC100155760/IFN-ALPHA-4/IFIT1/IFN-ALPHA-17/IFNK/IFN-OMEGA-4/IFN-OMEGA-5/IFN-OMEGA-6/IFNA1/IFNE/RALB/IFN-DELTA-2/IFN-DELTA-4/LOC100153325/IFN-DELTA-3/IFN-OMEGA-3/IFN-DELTA-5/IFN-ALPHA-13/IFN-ALPHA-9/IFN-DELTA-10/IFN-ALPHA-16/IFN-DELTA-11/IFN-DELTA-9	29
C3	GO:0002286	T cell activation involved in immune response	37/1779	67/8043	3.39384e-09	1.00248e-06	9.93395e-07	SLAMF6/SOCS5/IL23A/IFN-DELTA-8/ZNF397/IFN-ALPHAOMEGA/IFN-DELTA-7/IFNG/IFN-ALPHA-1/LOC100155760/FCER1G/IFN-ALPHA-4/IFN-ALPHA-17/RAB27A/IFNK/IL21/IFN-OMEGA-4/IFN-OMEGA-5/IFN-OMEGA-6/ANXA1/IFNA1/IFNE/GPR183/IFN-DELTA-2/IFN-DELTA-4/IL2/LOC100153325/IFN-DELTA-3/IFN-OMEGA-3/IL4/IFN-DELTA-5/IFN-ALPHA-13/IFN-ALPHA-9/IFN-DELTA-10/IFN-ALPHA-16/IFN-DELTA-11/IFN-DELTA-9	37
C3	GO:0050906	detection of stimulus involved in sensory perception	21/1779	28/8043	3.63724e-09	1.00248e-06	9.93395e-07	RTP1/TAS2R60/LOC100510915/RHO/RTP2/RPE65/TAS2R41/PPEF1/GNAT1/LOC100522928/TAS2R7/TAS2R9/LXN/LOC100152848/LOC100624876/LOC100511466/FYN/LOC100522675/LOC100627167/LOC100515554/LOC100155752	21
C3	GO:1904892	regulation of receptor signaling pathway via STAT	34/1779	60/8043	5.99997e-09	1.53556e-06	1.52165e-06	LEPR/IL26/PTK2B/IL23A/IL10RA/IFN-DELTA-8/IFN-ALPHAOMEGA/IFN-DELTA-7/IFNG/IFN-ALPHA-1/LOC100155760/IFN-ALPHA-4/IFN-ALPHA-17/IFNK/IFN-OMEGA-4/IFN-OMEGA-5/IFN-OMEGA-6/PRL/IFNA1/IFNE/IFN-DELTA-2/IFN-DELTA-4/JAK2/LOC100153325/IFN-DELTA-3/IFN-OMEGA-3/IL4/IFN-DELTA-5/IFN-ALPHA-13/IFN-ALPHA-9/IFN-DELTA-10/IFN-ALPHA-16/IFN-DELTA-11/IFN-DELTA-9	34
C3	GO:0042100	B cell proliferation	35/1779	63/8043	7.3003e-09	1.7438e-06	1.72799e-06	NTN1/TICAM1/MIF/IFN-DELTA-8/MEF2C/IFN-ALPHAOMEGA/IFN-DELTA-7/IFN-ALPHA-1/LOC100155760/IFN-ALPHA-4/IFN-ALPHA-17/ABL1/NFATC2/IFNK/IFN-OMEGA-4/IFN-OMEGA-5/IFN-OMEGA-6/IFNA1/CD180/IFNE/GPR183/IFN-DELTA-2/IFN-DELTA-4/IL2/LOC100153325/IFN-DELTA-3/IFN-OMEGA-3/IFN-DELTA-5/IFN-ALPHA-13/TFRC/IFN-ALPHA-9/IFN-DELTA-10/IFN-ALPHA-16/IFN-DELTA-11/IFN-DELTA-9	35
C3	GO:0070661	leukocyte proliferation	66/1779	159/8043	2.45027e-08	5.48706e-06	5.43733e-06	FOXP3/TBK1/JAK3/IL23A/P2RX7/CD80/TRAF6/MAPK8IP1/NTN1/TICAM1/MIF/IFN-DELTA-8/MEF2C/CTLA4/IFN-ALPHAOMEGA/IFN-DELTA-7/IL15/GBA/CCR2/CD28/IFN-ALPHA-1/LOC100155760/CD86/VTCN1/IFN-ALPHA-4/VSIR/VSIG4/IFN-ALPHA-17/ABL1/MSN/CD274/IL1B/PTH/NFATC2/STAT5B/IFNK/IFN-OMEGA-4/IFN-OMEGA-5/ARG2/IFN-OMEGA-6/SLC7A1/ANXA1/LOC100522011/IFNA1/CD180/IFNE/LGALS7/GPR183/IFN-DELTA-2/IFN-DELTA-4/IL2/NCK2/LOC100153325/TNFSF4…	66
C3	GO:0032943	mononuclear cell proliferation	64/1779	154/8043	3.78254e-08	7.52936e-06	7.46112e-06	FOXP3/TBK1/JAK3/IL23A/P2RX7/CD80/TRAF6/MAPK8IP1/NTN1/TICAM1/MIF/IFN-DELTA-8/MEF2C/CTLA4/IFN-ALPHAOMEGA/IFN-DELTA-7/IL15/CCR2/CD28/IFN-ALPHA-1/LOC100155760/CD86/VTCN1/IFN-ALPHA-4/VSIR/VSIG4/IFN-ALPHA-17/ABL1/MSN/CD274/IL1B/NFATC2/STAT5B/IFNK/IFN-OMEGA-4/IFN-OMEGA-5/ARG2/IFN-OMEGA-6/SLC7A1/ANXA1/LOC100522011/IFNA1/CD180/IFNE/LGALS7/GPR183/IFN-DELTA-2/IFN-DELTA-4/IL2/NCK2/LOC100153325/TNFSF4/FYN/IFN…	64
C3	GO:0046651	lymphocyte proliferation	64/1779	154/8043	3.78254e-08	7.52936e-06	7.46112e-06	FOXP3/TBK1/JAK3/IL23A/P2RX7/CD80/TRAF6/MAPK8IP1/NTN1/TICAM1/MIF/IFN-DELTA-8/MEF2C/CTLA4/IFN-ALPHAOMEGA/IFN-DELTA-7/IL15/CCR2/CD28/IFN-ALPHA-1/LOC100155760/CD86/VTCN1/IFN-ALPHA-4/VSIR/VSIG4/IFN-ALPHA-17/ABL1/MSN/CD274/IL1B/NFATC2/STAT5B/IFNK/IFN-OMEGA-4/IFN-OMEGA-5/ARG2/IFN-OMEGA-6/SLC7A1/ANXA1/LOC100522011/IFNA1/CD180/IFNE/LGALS7/GPR183/IFN-DELTA-2/IFN-DELTA-4/IL2/NCK2/LOC100153325/TNFSF4/FYN/IFN…	64
C3	GO:0033138	positive regulation of peptidyl-serine phosphorylation	30/1779	53/8043	4.89592e-08	9.23268e-06	9.149e-06	OPRD1/MIF/IFN-DELTA-8/HDAC6/GCG/IFN-ALPHAOMEGA/IFN-DELTA-7/IFNG/IFN-ALPHA-1/LOC100155760/IFN-ALPHA-4/IFN-ALPHA-17/IFNK/IFN-OMEGA-4/IFN-OMEGA-5/IFN-OMEGA-6/IFNA1/IFNE/IFN-DELTA-2/IFN-DELTA-4/LOC100153325/IFN-DELTA-3/IFN-OMEGA-3/IFN-DELTA-5/IFN-ALPHA-13/IFN-ALPHA-9/IFN-DELTA-10/IFN-ALPHA-16/IFN-DELTA-11/IFN-DELTA-9	30
C3	GO:0030183	B cell differentiation	36/1779	71/8043	1.06023e-07	1.89941e-05	1.88219e-05	RBPJ/JAK3/PTK2B/CD79A/IFN-DELTA-8/ZBTB7A/IFN-ALPHAOMEGA/IFN-DELTA-7/IFN-ALPHA-1/LOC100155760/IFN-ALPHA-4/IFN-ALPHA-17/ABL1/MMP14/STAT5B/IFNK/IL21/IFN-OMEGA-4/IFN-OMEGA-5/IFN-OMEGA-6/IFNA1/IFNE/GPR183/IFN-DELTA-2/IFN-DELTA-4/IL2/LOC100153325/IFN-DELTA-3/IFN-OMEGA-3/IFN-DELTA-5/IFN-ALPHA-13/IFN-ALPHA-9/IFN-DELTA-10/IFN-ALPHA-16/IFN-DELTA-11/IFN-DELTA-9	36
C3	GO:0007259	receptor signaling pathway via JAK-STAT	44/1779	96/8043	1.89075e-07	3.22597e-05	3.19674e-05	IL22RA2/LEPR/IL26/JAK3/PTK2B/SOCS5/IL23A/IL10RA/IFN-DELTA-8/IFN-ALPHAOMEGA/IFN-DELTA-7/IL15/IFNG/IFN-ALPHA-1/LOC100155760/IFN-ALPHA-4/IFN-ALPHA-17/IL31RA/IL28B/IL29/STAT5B/IFNK/IFN-OMEGA-4/IFN-OMEGA-5/IFN-OMEGA-6/PRL/IFNA1/IFNE/IFN-DELTA-2/IFN-DELTA-4/JAK2/IL2/LOC100153325/FYN/IFN-DELTA-3/IFN-OMEGA-3/IL4/IFN-DELTA-5/IFN-ALPHA-13/IFN-ALPHA-9/IFN-DELTA-10/IFN-ALPHA-16/IFN-DELTA-11/IFN-DELTA-9	44
C3	GO:0033135	regulation of peptidyl-serine phosphorylation	32/1779	62/8043	3.19461e-07	5.20285e-05	5.1557e-05	RASSF2/OPRD1/MIF/IFN-DELTA-8/HDAC6/GCG/IFN-ALPHAOMEGA/IFN-DELTA-7/IFNG/IFN-ALPHA-1/LOC100155760/IFN-ALPHA-4/IFN-ALPHA-17/IFNK/IFN-OMEGA-4/IFN-OMEGA-5/IFN-OMEGA-6/IFNA1/IFNE/IFN-DELTA-2/IFN-DELTA-4/NCK2/LOC100153325/IFN-DELTA-3/IFN-OMEGA-3/IFN-DELTA-5/IFN-ALPHA-13/IFN-ALPHA-9/IFN-DELTA-10/IFN-ALPHA-16/IFN-DELTA-11/IFN-DELTA-9	32
C3	GO:0097696	receptor signaling pathway via STAT	44/1779	98/8043	3.90608e-07	6.08499e-05	6.02984e-05	IL22RA2/LEPR/IL26/JAK3/PTK2B/SOCS5/IL23A/IL10RA/IFN-DELTA-8/IFN-ALPHAOMEGA/IFN-DELTA-7/IL15/IFNG/IFN-ALPHA-1/LOC100155760/IFN-ALPHA-4/IFN-ALPHA-17/IL31RA/IL28B/IL29/STAT5B/IFNK/IFN-OMEGA-4/IFN-OMEGA-5/IFN-OMEGA-6/PRL/IFNA1/IFNE/IFN-DELTA-2/IFN-DELTA-4/JAK2/IL2/LOC100153325/FYN/IFN-DELTA-3/IFN-OMEGA-3/IL4/IFN-DELTA-5/IFN-ALPHA-13/IFN-ALPHA-9/IFN-DELTA-10/IFN-ALPHA-16/IFN-DELTA-11/IFN-DELTA-9	44
C3	GO:0002366	leukocyte activation involved in immune response	51/1779	123/8043	9.87619e-07	0.000147443	0.000146107	CD84/SLAMF6/PTK2B/SOCS5/IL23A/TICAM1/IFN-DELTA-8/ZNF397/IFN-ALPHAOMEGA/IFN-DELTA-7/IFNG/IL13/CCR2/IL13RA2/IFN-ALPHA-1/LOC100155760/FCER1G/IFN-ALPHA-4/IFN-ALPHA-17/ABL1/RAB27A/AP1G1/FAM35A/IFNK/IL21/IFN-OMEGA-4/IFN-OMEGA-5/IFN-OMEGA-6/ANXA1/LOC100522011/IFNA1/CD180/IFNE/SNAP23/GPR183/IFN-DELTA-2/IFN-DELTA-4/IL2/DNASE1/LOC100153325/IFN-DELTA-3/IFN-OMEGA-3/IL4/IFN-DELTA-5/IFN-ALPHA-13/TFRC/IFN-ALPHA…	51
C3	GO:0002285	lymphocyte activation involved in immune response	43/1779	98/8043	1.14084e-06	0.000163505	0.000162023	SLAMF6/PTK2B/SOCS5/IL23A/IFN-DELTA-8/ZNF397/IFN-ALPHAOMEGA/IFN-DELTA-7/IFNG/IFN-ALPHA-1/LOC100155760/FCER1G/IFN-ALPHA-4/IFN-ALPHA-17/ABL1/RAB27A/AP1G1/FAM35A/IFNK/IL21/IFN-OMEGA-4/IFN-OMEGA-5/IFN-OMEGA-6/ANXA1/IFNA1/CD180/IFNE/GPR183/IFN-DELTA-2/IFN-DELTA-4/IL2/LOC100153325/IFN-DELTA-3/IFN-OMEGA-3/IL4/IFN-DELTA-5/IFN-ALPHA-13/TFRC/IFN-ALPHA-9/IFN-DELTA-10/IFN-ALPHA-16/IFN-DELTA-11/IFN-DELTA-9	43
C3	GO:0002263	cell activation involved in immune response	51/1779	125/8043	1.76159e-06	0.000242761	0.00024056	CD84/SLAMF6/PTK2B/SOCS5/IL23A/TICAM1/IFN-DELTA-8/ZNF397/IFN-ALPHAOMEGA/IFN-DELTA-7/IFNG/IL13/CCR2/IL13RA2/IFN-ALPHA-1/LOC100155760/FCER1G/IFN-ALPHA-4/IFN-ALPHA-17/ABL1/RAB27A/AP1G1/FAM35A/IFNK/IL21/IFN-OMEGA-4/IFN-OMEGA-5/IFN-OMEGA-6/ANXA1/LOC100522011/IFNA1/CD180/IFNE/SNAP23/GPR183/IFN-DELTA-2/IFN-DELTA-4/IL2/DNASE1/LOC100153325/IFN-DELTA-3/IFN-OMEGA-3/IL4/IFN-DELTA-5/IFN-ALPHA-13/TFRC/IFN-ALPHA…	51
C3	GO:0006959	humoral immune response	63/1779	169/8043	4.45103e-06	0.000590669	0.000585315	RBPJ/DEFB1/LTF/C8B/PMAP-23/C1QB/SFTPD/PPBP/SPAI-2/CXCL9/CFD/IFN-DELTA-8/MEF2C/CXCL8/MBL1/MBL2/IFN-ALPHAOMEGA/IFN-DELTA-7/IFNG/CCR2/C6/CXCL13/IFN-ALPHA-1/LOC100155760/C4A/PI3/IFN-ALPHA-4/APCS/MASP1/IFN-ALPHA-17/C8A/CFB/IFNK/IFN-OMEGA-4/IFN-OMEGA-5/IFN-OMEGA-6/WAP/C5/LOC100517891/IFNA1/CXCL10/CFI/LOC102159373/IFNE/GPR183/IFN-DELTA-2/IFN-DELTA-4/CXCL11/LOC100153325/IFN-DELTA-3/IFN-OMEGA-3/LOC1021622…	63
C3	GO:0042113	B cell activation	46/1779	113/8043	6.02745e-06	0.000771299	0.000764308	RBPJ/JAK3/PTK2B/NTN1/CD79A/TICAM1/MIF/IFN-DELTA-8/MEF2C/ZBTB7A/IFN-ALPHAOMEGA/IFN-DELTA-7/IFN-ALPHA-1/LOC100155760/IFN-ALPHA-4/IFN-ALPHA-17/ABL1/MMP14/NFATC2/FAM35A/STAT5B/IFNK/IL21/IFN-OMEGA-4/IFN-OMEGA-5/IFN-OMEGA-6/IFNA1/CD180/IFNE/GPR183/IFN-DELTA-2/IFN-DELTA-4/LAT2/IL2/LOC100153325/IFN-DELTA-3/IFN-OMEGA-3/IL4/IFN-DELTA-5/IFN-ALPHA-13/TFRC/IFN-ALPHA-9/IFN-DELTA-10/IFN-ALPHA-16/IFN-DELTA-11/IF…	46
C3	GO:0051607	defense response to virus	58/1779	154/8043	7.34097e-06	0.000876756	0.00086881	TICAM2/BST2/IL23A/ISG15/PCBP2/TICAM1/CXCL9/MAVS/IFN-DELTA-8/IFN-OMEGA-2/IFN-ALPHAOMEGA/IFN-DELTA-7/IFNG/TLR8/IFIT3/IFN-ALPHA-1/IFN-OMEGA-7/LOC100155760/IFN-ALPHA-4/IFIT1/TLR7/IFN-ALPHA-17/OASL/IL28B/IFN-ALPHA-10/TRAF3/IL29/ISG20/IFNK/IFN-OMEGA-4/IFN-OMEGA-5/IFN-OMEGA-6/PLSCR1/LOC100522011/IFNA1/CXCL10/IFNE/SIN3A/IFN-ALPHA-5/IFN-DELTA-2/IFN-DELTA-4/LOC100153325/IFN-DELTA-3/IFN-ALPHA-8/IFN-OMEGA-3/…	58
C3	GO:0140546	defense response to symbiont	58/1779	154/8043	7.34097e-06	0.000876756	0.00086881	TICAM2/BST2/IL23A/ISG15/PCBP2/TICAM1/CXCL9/MAVS/IFN-DELTA-8/IFN-OMEGA-2/IFN-ALPHAOMEGA/IFN-DELTA-7/IFNG/TLR8/IFIT3/IFN-ALPHA-1/IFN-OMEGA-7/LOC100155760/IFN-ALPHA-4/IFIT1/TLR7/IFN-ALPHA-17/OASL/IL28B/IFN-ALPHA-10/TRAF3/IL29/ISG20/IFNK/IFN-OMEGA-4/IFN-OMEGA-5/IFN-OMEGA-6/PLSCR1/LOC100522011/IFNA1/CXCL10/IFNE/SIN3A/IFN-ALPHA-5/IFN-DELTA-2/IFN-DELTA-4/LOC100153325/IFN-DELTA-3/IFN-ALPHA-8/IFN-OMEGA-3/…	58
C3	GO:0042110	T cell activation	77/1779	221/8043	7.8403e-06	0.000906187	0.000897974	FOXP3/LEPR/SLAMF6/SIT1/JAK3/SOCS5/IL23A/P2RX7/CD80/CD3G/TRAF6/CD3D/MAPK8IP1/CCR9/IFN-DELTA-8/PRDM1/ZNF397/CTLA4/IFN-ALPHAOMEGA/IFN-DELTA-7/IL15/IFNG/GBA/CCR2/CD28/IFN-ALPHA-1/LOC100155760/FCER1G/ICOS/CD86/VTCN1/IFN-ALPHA-4/VSIR/VSIG4/IFN-ALPHA-17/ABL1/JAML/MSN/RAB27A/CD274/IL1B/STAT5B/IFNK/TNFAIP8L2/IL21/IFN-OMEGA-4/IFN-OMEGA-5/ARG2/IFN-OMEGA-6/SLC7A1/ANXA1/LOC100522011/RHOA/IFNA1/IFNE/GPR18/LGAL…	77
C3	GO:0046649	lymphocyte activation	93/1779	281/8043	1.06735e-05	0.0011951	0.00118427	FOXP3/TBK1/RBPJ/LEPR/SLAMF6/SIT1/JAK3/PTK2B/SOCS5/IL23A/P2RX7/CD80/CD3G/TRAF6/CD3D/MAPK8IP1/NTN1/CD79A/TICAM1/MIF/CCR9/IFN-DELTA-8/PRDM1/MEF2C/ZBTB7A/ZNF397/CTLA4/IFN-ALPHAOMEGA/IFN-DELTA-7/IL15/IFNG/GBA/CCR2/CD28/IFN-ALPHA-1/LOC100155760/FCER1G/ICOS/CD86/VTCN1/IFN-ALPHA-4/VSIR/VSIG4/IFN-ALPHA-17/ABL1/JAML/MSN/RAB27A/AP1G1/CD274/MMP14/IL1B/NFATC2/FAM35A/STAT5B/KLRK1/IFNK/TNFAIP8L2/IL21/IFN-OMEGA-…	93
C3	GO:0009593	detection of chemical stimulus	17/1779	28/8043	1.15222e-05	0.00125103	0.00123969	RTP1/TAS2R60/LOC100510915/RTP2/TAS2R41/LOC100522928/TAS2R7/CASR/TAS2R9/LY96/LOC100152848/LOC100624876/LOC100511466/LOC100522675/LOC100627167/LOC100515554/LOC100155752	17
C3	GO:0018105	peptidyl-serine phosphorylation	44/1779	109/8043	1.23314e-05	0.00129951	0.00128773	TBK1/LOC100359361/RASSF2/PKN1/SGK1/OPRD1/MIF/IFN-DELTA-8/HDAC6/GCG/IFN-ALPHAOMEGA/IFN-DELTA-7/TSSK4/IFNG/TSSK2/IFN-ALPHA-1/LOC100155760/PDK3/IFN-ALPHA-4/IFN-ALPHA-17/AKT3/IFNK/RPS6KA6/IFN-OMEGA-4/IFN-OMEGA-5/IFN-OMEGA-6/IFNA1/IFNE/TLK1/IFN-DELTA-2/IFN-DELTA-4/NCK2/LOC100153325/IFN-DELTA-3/RPS6KB1/DYRK1A/IFN-OMEGA-3/IFN-DELTA-5/IFN-ALPHA-13/IFN-ALPHA-9/IFN-DELTA-10/IFN-ALPHA-16/IFN-DELTA-11/IFN-DE…	44
C3	GO:0007600	sensory perception	61/1779	168/8043	1.6367e-05	0.00167552	0.00166033	DDIT3/TMTC4/RTP1/TAS2R60/TMEM100/PDE6H/MME/LOC100510915/P2RX7/OPN1SW/RHO/LOC100513516/ARR3/LOC100620101/RTP2/RPE65/NPY1R/GLRB/TAS2R41/LOC100620388/CLRN1/LOC100152197/PPEF1/GNAT1/LOC100522928/CCR2/GJD2/RIPOR2/LOC106509349/TAS2R7/LOC100516632/LOC100524268/PDE6C/TAS2R9/LXN/LOC100514671/LOC100516990/SLC26A5/AOC2/OMP/LOC100623188/LOC100152848/CDH23/PDC/B3GNT2/LOC100524947/CD36/LOC100516454/LOC10062487…	61
C3	GO:0009615	response to virus	60/1779	165/8043	1.81849e-05	0.0018099	0.0017935	TICAM2/BST2/IL23A/HYAL1/ISG15/PCBP2/TICAM1/CXCL9/MAVS/IFN-DELTA-8/IFN-OMEGA-2/IFN-ALPHAOMEGA/IFN-DELTA-7/IFNG/TLR8/IFIT3/IFN-ALPHA-1/IFN-OMEGA-7/LOC100155760/IFN-ALPHA-4/IFIT1/TLR7/IFN-ALPHA-17/OASL/IL28B/IFN-ALPHA-10/TRAF3/IL29/ISG20/IFNK/IL21/IFN-OMEGA-4/IFN-OMEGA-5/IFN-OMEGA-6/PLSCR1/LOC100522011/IFNA1/CXCL10/IFNE/SIN3A/IFN-ALPHA-5/IFN-DELTA-2/IFN-DELTA-4/LOC100153325/IFN-DELTA-3/IFN-ALPHA-8/I…	60
C3	GO:0002250	adaptive immune response	70/1779	201/8043	2.04646e-05	0.00198175	0.00196379	FOXP3/LOC106504372/SLAMF6/CD1.1/HMGB1/C8B/C1QB/SOCS5/IL23A/P2RX7/SLA-DQA1/CD3G/TRAF6/CD3D/NTN1/CD79A/IFN-DELTA-8/MEF2C/TXK/MBL1/MBL2/IFN-ALPHAOMEGA/TEC/IFN-DELTA-7/IFNG/CCR2/C6/IL13RA2/IFN-ALPHA-1/LOC100155760/C4A/FCER1G/IFN-ALPHA-4/APCS/IFN-ALPHA-17/RAB27A/IL1B/SLA-DRB1/FAM35A/C8A/KLRK1/IFNK/IFN-OMEGA-4/IFN-OMEGA-5/IFN-OMEGA-6/ANXA1/LOC100522011/C5/SIRT1/LOC100517891/IFNA1/IFNE/GPR183/IFN-DELTA-…	70
C3	GO:0051606	detection of stimulus	30/1779	68/8043	4.11501e-05	0.00383005	0.00379534	RTP1/TAS2R60/LOC100359361/LOC100510915/OPN1SW/RHO/PGLYRP2/RTP2/RPE65/TAS2R41/PPEF1/GNAT1/LOC100522928/TAS2R7/CAV3/CASR/PDE6C/TAS2R9/LXN/LY96/LOC100152848/SRPX/LOC100624876/LOC100511466/FYN/LOC100522675/RCVRN/LOC100627167/LOC100515554/LOC100155752	30
C3	GO:0018209	peptidyl-serine modification	45/1779	117/8043	4.16891e-05	0.00383005	0.00379534	TBK1/LOC100359361/RASSF2/PKN1/SGK1/OPRD1/MIF/IFN-DELTA-8/HDAC6/GCG/GALNT1/IFN-ALPHAOMEGA/IFN-DELTA-7/TSSK4/IFNG/TSSK2/IFN-ALPHA-1/LOC100155760/PDK3/IFN-ALPHA-4/IFN-ALPHA-17/AKT3/IFNK/RPS6KA6/IFN-OMEGA-4/IFN-OMEGA-5/IFN-OMEGA-6/IFNA1/IFNE/TLK1/IFN-DELTA-2/IFN-DELTA-4/NCK2/LOC100153325/IFN-DELTA-3/RPS6KB1/DYRK1A/IFN-OMEGA-3/IFN-DELTA-5/IFN-ALPHA-13/IFN-ALPHA-9/IFN-DELTA-10/IFN-ALPHA-16/IFN-DELTA-11…	45
C3	GO:0030098	lymphocyte differentiation	55/1779	152/8043	4.70293e-05	0.00421265	0.00417447	RBPJ/LEPR/SLAMF6/JAK3/PTK2B/SOCS5/IL23A/CD3G/CD3D/CD79A/CCR9/IFN-DELTA-8/PRDM1/ZBTB7A/ZNF397/IFN-ALPHAOMEGA/IFN-DELTA-7/IFNG/GBA/CCR2/IFN-ALPHA-1/LOC100155760/FCER1G/IFN-ALPHA-4/VSIR/IFN-ALPHA-17/ABL1/MMP14/IL1B/STAT5B/IFNK/IL21/IFN-OMEGA-4/IFN-OMEGA-5/IFN-OMEGA-6/ANXA1/RHOA/IFNA1/IFNE/GPR18/GPR183/IFN-DELTA-2/IFN-DELTA-4/IL2/LOC100153325/IFN-DELTA-3/IFN-OMEGA-3/IL4/IFN-DELTA-5/IFN-ALPHA-13/IFN-A…	55
C3	GO:0002521	leukocyte differentiation	71/1779	211/8043	6.44013e-05	0.00562804	0.00557703	RBPJ/LEPR/LTF/SLAMF6/JAK3/IL25/RASSF2/PTK2B/SOCS5/IL23A/FAM213A/L3MBTL3/CD3G/TRAF6/CD3D/CD79A/CCR9/IFN-DELTA-8/PAFAH1B1/PRDM1/ZBTB7A/ZNF397/IFN-ALPHAOMEGA/IFN-DELTA-7/IFNG/GBA/CCR2/IFN-ALPHA-1/LOC100155760/GATA1/FCER1G/CCR1/IFN-ALPHA-4/VSIR/APCS/CD101/IFN-ALPHA-17/ABL1/IL31RA/MMP14/IL1B/FSHB/STAT5B/CD109/IFNK/EVI2B/IL21/IFN-OMEGA-4/IFN-OMEGA-5/IFN-OMEGA-6/ANXA1/SIRT1/RHOA/IFNA1/IFNE/GPR18/GPR183/…	71
C3	GO:0045321	leukocyte activation	103/1779	332/8043	7.61419e-05	0.00649563	0.00643676	FOXP3/CD84/FAM19A3/TBK1/RBPJ/LEPR/SLAMF6/SIT1/JAK3/PTK2B/SOCS5/IL23A/P2RX7/CD80/CD3G/TRAF6/CD3D/MAPK8IP1/NTN1/CD79A/TICAM1/MIF/CCR9/IFN-DELTA-8/PRDM1/MEF2C/CXCL8/ZBTB7A/ZNF397/CTLA4/IFN-ALPHAOMEGA/IFN-DELTA-7/IL15/IFNG/GBA/IL13/CCR2/IL13RA2/CD28/IFN-ALPHA-1/LOC100155760/FCER1G/ICOS/CD86/VTCN1/IFN-ALPHA-4/VSIR/VSIG4/IFN-ALPHA-17/ABL1/JAML/MSN/RAB27A/AP1G1/CD274/MMP14/IL1B/NFATC2/FAM35A/STAT5B/KLRK…	103
C3	GO:1903131	mononuclear cell differentiation	59/1779	169/8043	8.28459e-05	0.00690319	0.00684062	RBPJ/LEPR/SLAMF6/JAK3/PTK2B/SOCS5/IL23A/CD3G/TRAF6/CD3D/CD79A/CCR9/IFN-DELTA-8/PRDM1/ZBTB7A/ZNF397/IFN-ALPHAOMEGA/IFN-DELTA-7/IFNG/GBA/CCR2/IFN-ALPHA-1/LOC100155760/GATA1/FCER1G/IFN-ALPHA-4/VSIR/APCS/IFN-ALPHA-17/ABL1/IL31RA/MMP14/IL1B/STAT5B/IFNK/IL21/IFN-OMEGA-4/IFN-OMEGA-5/IFN-OMEGA-6/ANXA1/RHOA/IFNA1/IFNE/GPR18/GPR183/IFN-DELTA-2/IFN-DELTA-4/IL2/LOC100153325/IFN-DELTA-3/IFN-OMEGA-3/IL4/IFN-DE…	59
C3	GO:0007186	G protein-coupled receptor signaling pathway	109/1779	357/8043	9.78449e-05	0.00796768	0.00789547	PIK3R5/DGKA/GPR1/NMB/PTGER2/RGS10/PTK2B/GNB3/GPR119/RHO/RAMP1/LOC100513516/GPR63/ARR3/LOC100620101/VIP/NPY1R/AGRP/OPRD1/CXCL9/ADRA1B/GLRB/NTS/C14H10orf99/OXTR/LTB4R2/SCG5/CRSP3/LOC100620388/CCL4/CXCL8/ABHD6/GCG/ARHGEF12/TAC3/CALCR/LPAR3/PSAPL1/LOC100152197/GNRHR/GNAT1/GPR17/ESR1/LPAR4/CORT/LOC100525298/LOC100524975/LOC106509349/CHRM3/CMKLR1/LOC100516632/FSHR/LOC100524268/CASR/CCL25/RGS14/GPR33/RG…	109
C3	GO:0007204	positive regulation of cytosolic calcium ion concentration	43/1779	115/8043	0.000131213	0.0104475	0.0103528	DDIT3/PTGER2/ACKR2/PTK2B/TRPV4/P2RX7/CAPN3/CXCL9/ADRA1B/CCR9/TRPC3/CALCR/HRH4/SLC8A3/GPR17/ESR1/CCR2/LPAR4/CCR4/PLA2G1B/CMKLR1/CCR1/GPR33/ABL1/CX3CR1/XCR1/GPER1/CCR3/CXCR6/SRI/CCR5/F2RL2/GPR174/GHRL/CD36/CXCL10/PLCZ1/GPR18/ACKR4/FYN/CCRL2/C5AR2/HTR2B	43
C3	GO:0002252	immune effector process	106/1779	348/8043	0.000134961	0.0105123	0.010417	FOXP3/TICAM2/CD84/BST2/SLAMF6/CD1.1/HMGB1/C8B/IL5/C1QB/PTK2B/SOCS5/IL23A/P2RX7/ISG15/PCBP2/TRAF6/NTN1/TICAM1/CXCL9/CFD/MAVS/MIF/IFN-DELTA-8/IFN-OMEGA-2/MBL1/ZNF397/MBL2/IFN-ALPHAOMEGA/IFN-DELTA-7/IFNG/TLR8/IL13/CCR2/C6/IL13RA2/IFIT3/IFN-ALPHA-1/IFN-OMEGA-7/LOC100155760/C4A/PLA2G1B/FCER1G/IFN-ALPHA-4/APCS/MASP1/IFIT1/TLR7/IFN-ALPHA-17/OASL/ABL1/RAB27A/IL28B/AP1G1/IL1B/IFN-ALPHA-10/TRAF3/FAM35A/IL2…	106
C3	GO:0051480	regulation of cytosolic calcium ion concentration	50/1779	140/8043	0.000149097	0.0113663	0.0112632	DDIT3/PTGER2/ACKR2/PTK2B/TRPV4/P2RX7/CAPN3/CXCL9/ADRA1B/CCR9/TRPC3/CRSP3/CALCR/HRH4/SLC8A3/CAV2/GPR17/ESR1/CCR2/LPAR4/CCR4/PLA2G1B/CMKLR1/CAV3/CCR1/GPR33/ABL1/CX3CR1/XCR1/GPER1/CCR3/CDH23/CXCR6/SRI/CCR5/F2RL2/TRPC5/GPR174/GHRL/CRSP-2/ATP2B1/CD36/CXCL10/PLCZ1/GPR18/ACKR4/FYN/CCRL2/C5AR2/HTR2B	50
C3	GO:0001775	cell activation	114/1779	383/8043	0.000214683	0.0160252	0.01588	FOXP3/CD84/FAM19A3/ZP2/TBK1/RBPJ/LEPR/SLAMF6/SIT1/JAK3/PTK2B/SOCS5/IL23A/P2RX7/CAPN3/CD80/CD3G/TRAF6/CD3D/MAPK8IP1/NTN1/CD79A/TICAM1/MIF/CCR9/IFN-DELTA-8/TGFBR1/PRDM1/MEF2C/TXK/CXCL8/ZBTB7A/F2/ZNF397/CTLA4/IFN-ALPHAOMEGA/TEC/IFN-DELTA-7/IL15/IFNG/GBA/IL13/CCR2/IL13RA2/CD28/IFN-ALPHA-1/LOC100155760/GATA1/FCER1G/ICOS/CD86/VTCN1/IFN-ALPHA-4/VSIR/VSIG4/IFN-ALPHA-17/SMAD4/ABL1/JAML/MSN/RAB27A/AP1G1/CD…	114
C3	GO:0098542	defense response to other organism	137/1779	475/8043	0.000244306	0.0178642	0.0177023	TICAM2/BST2/TBK1/LOC100157086/RBPJ/DEFB1/GNLY/LTF/SLAMF6/HMGB1/C8B/DEFB124/SPAG11/PMAP-23/PTK2B/BPI/SFTPD/IL23A/P2RX7/ISG15/LOC404703/PGLYRP2/PCBP2/LOC100523177/SPAI-2/TICAM1/CXCL9/CFD/MAVS/LYPD8/MIF/RELA/C14H10orf99/IFN-DELTA-8/LOC692190/IFN-OMEGA-2/TXK/CCL4/LGALS3/MBL1/TLR9/MBL2/IFN-ALPHAOMEGA/IFN-DELTA-7/CLEC5A/IFNG/TLR8/CYBA/C6/DEFB125/IFIT3/IFN-ALPHA-1/TLR10/IFN-OMEGA-7/HP/LOC100155760/C4A/F…	137
C3	GO:0050853	B cell receptor signaling pathway	8/1779	11/8043	0.000486469	0.0348604	0.0345444	BLNK/BLK/CD79A/MEF2C/TEC/LIME1/ABL1/NFATC2	8
C3	GO:0014070	response to organic cyclic compound	71/1779	226/8043	0.00065114	0.0457458	0.0453312	PPP2R2A/DUOX1/CYP19A3/P2RX7/REST/RNF14/MYOG/CCDC62/SMAD1/TICAM1/BRCA1/IFN-DELTA-8/MEF2C/TRPC3/ZBTB7A/PAQR7/P2RY11/IFN-ALPHAOMEGA/IFN-DELTA-7/CAV2/ESR1/IFN-ALPHA-1/LOC100155760/IFN-ALPHA-4/IFIT1/IFN-ALPHA-17/AQP9/BGLAP/PAQR8/GPER1/IFNK/CYP19A1/ZNF366/IFN-OMEGA-4/IFN-OMEGA-5/IFN-OMEGA-6/GRAMD1C/GNRH1/ANXA1/CD36/SIRT1/RHOA/ESR2/IFNA1/IFNE/RAP1B/RALB/IFN-DELTA-2/IFN-DELTA-4/CTNNB1/LOC100621006/CYP19A…	71

## Sheet: Fig. S5C
Supplemental Table S3. Gene Ontology enrichment for gene clusters, distal H3K27me3-marked genes and bivalent genes
Cluster	ID	Description	GeneRatio	BgRatio	pvalue	p.adjust	qvalue	geneID	Count
Genes marked with distal H3K27me3	GO:0031175	neuron projection development	111/2568	241/8043	2.31946e-06	0.0085101	0.00843795	SEMA3G/TRIM32/CDH23/RTN4/PHACTR1/LZTS1/MAP1B/EPHA2/EXT1/GBX2/NTRK3/RASGRF1/MANF/RAB3A/LRP8/GLI2/CXCL12/SPOCK1/UNC5B/DPYSL5/ROR2/NTF3/WNT5A/YWHAH/PTK2B/GPM6B/SEMA4D/RTN4R/GAP43/MEGF8/GAS7/EPHB3/ATCAY/CDH11/SEMA4F/FES/CPNE5/ETV1/DPYSL2/FGFR2/HECW2/SYT17/LMX1A/SEMA6D/EPHA1/NOG/SRCIN1/PTK7/PRKN/SRF/NTF4/CNR1/CHODL/CLRN1/DCX/RGMA/LHX2/WNT7A/GBX1/NUMB/PTPN11/EFHD1/BBS1/PRKCSH/NR2E1/PLXNB3/NDEL1/RAB11A/…	111
Genes marked with distal H3K27me3	GO:0048666	neuron development	124/2568	281/8043	8.72007e-06	0.015997	0.0158613	SEMA3G/TRIM32/CDH23/RTN4/PHACTR1/LZTS1/MAP1B/EPHA2/EXT1/CRB2/GBX2/NTRK3/RASGRF1/GNAT1/MANF/RAB3A/LRP8/GLI2/CXCL12/SPOCK1/UNC5B/DPYSL5/ROR2/NTF3/WNT5A/YWHAH/PTK2B/GPM6B/SEMA4D/RTN4R/GAP43/MEGF8/GAS7/EPHB3/ATCAY/CDH11/SEMA4F/FES/GLDN/CDHR1/PDE6C/CPNE5/ETV1/DPYSL2/FGFR2/HECW2/SYT17/LMX1A/SEMA6D/EPHA1/NOG/SRCIN1/PTK7/PRKN/SRF/NTF4/CNR1/CHODL/CLRN1/DCX/RGMA/LHX2/WNT7A/GBX1/NUMB/PTPN11/EFHD1/BBS1/PRKCS…	124
Genes marked with distal H3K27me3	GO:0048699	generation of neurons	173/2568	417/8043	1.56264e-05	0.0173904	0.0172429	SEMA3G/CCR4/RUNX1/TRIM32/CDH23/RTN4/PHACTR1/LZTS1/MAP1B/EPHA2/EXT1/TNR/CRB2/GBX2/GBA/NTRK3/PTCH1/RASGRF1/GNAT1/MANF/DCT/RAB3A/LRP8/GLI2/CXCL12/SPOCK1/UNC5B/DPYSL5/LIN28A/ROR2/ACSL6/NTF3/WNT5A/YWHAH/PTK2B/WNT2B/GNRH1/LBX1/GPM6B/SEMA4D/RTN4R/GAP43/MEGF8/GAS7/EPHB3/ATCAY/NEPRO/CDH11/HEY1/SEMA4F/DLL4/FES/GLDN/BCL6/CDHR1/BARHL1/AKNA/PDE6C/CPNE5/VEGFD/ETV1/BHLHE40/DPYSL2/FGFR2/HECW2/BMPR1A/SYT17/PROX1/…	173
Genes marked with distal H3K27me3	GO:0032990	cell part morphogenesis	80/2568	170/8043	2.28817e-05	0.0173904	0.0172429	SEMA3G/RTN4/PHACTR1/LZTS1/MAP1B/EPHA2/EXT1/GBX2/RAB3A/LRP8/GLI2/CXCL12/UNC5B/DPYSL5/NTF3/WNT5A/YWHAH/ENPP2/SEMA4D/RTN4R/GAP43/MEGF8/GAS7/EPHB3/CDH11/SEMA4F/CPNE5/ETV1/DPYSL2/FGFR2/HECW2/SYT17/LMX1A/SEMA6D/EPHA1/NOG/SRCIN1/PLEKHO1/PRKN/SRF/NTF4/CHODL/DCX/LHX2/WNT7A/GBX1/NUMB/PTPN11/NR2E1/PLXNB3/RAB11A/SGK1/PTPRZ1/SIN3A/NRP1/EFNB3/ZFYVE27/MTM1/CHL1/MEF2A/GDF7/ABL1/NFIB/SLITRK3/TAOK1/RND2/LGI1/PAFAH…	80
Genes marked with distal H3K27me3	GO:0048667	cell morphogenesis involved in neuron differentiation	71/2568	148/8043	2.95839e-05	0.0173904	0.0172429	SEMA3G/RTN4/PHACTR1/LZTS1/MAP1B/EPHA2/EXT1/GBX2/RAB3A/LRP8/GLI2/CXCL12/UNC5B/DPYSL5/WNT5A/YWHAH/SEMA4D/RTN4R/GAP43/MEGF8/EPHB3/CDH11/SEMA4F/CDHR1/ETV1/DPYSL2/FGFR2/HECW2/LMX1A/SEMA6D/EPHA1/NOG/SRCIN1/SRF/CHODL/CLRN1/DCX/LHX2/WNT7A/GBX1/NUMB/PTPN11/BBS1/NR2E1/PLXNB3/RAB11A/PTPRZ1/SIN3A/NRP1/EFNB3/ZFYVE27/CHL1/MEF2A/GDF7/ABL1/NFIB/SLITRK3/RND2/LGI1/PAFAH1B1/SIPA1L1/UCHL1/PLPPR4/PTN/PSEN1/EPHA3/RUFY…	71
Genes marked with distal H3K27me3	GO:0010975	regulation of neuron projection development	45/2568	84/8043	3.00393e-05	0.0173904	0.0172429	SEMA3G/RTN4/LZTS1/NTRK3/LRP8/SPOCK1/ROR2/WNT5A/YWHAH/PTK2B/SEMA4D/MEGF8/EPHB3/FES/HECW2/SEMA6D/SRCIN1/PTK7/SRF/CHODL/RGMA/PRKCSH/NR2E1/PLXNB3/NDEL1/RAB11A/AVIL/SLC39A12/NRP1/EFNB3/ZFYVE27/MYLIP/BMP5/FBXO38/RND2/PAFAH1B1/PTPN9/SIPA1L1/RHOA/PTN/PSEN1/EPHA3/RUFY3/FYN/SEMA3E	45
Genes marked with distal H3K27me3	GO:0030182	neuron differentiation	155/2568	372/8043	3.31787e-05	0.0173904	0.0172429	SEMA3G/RUNX1/TRIM32/CDH23/RTN4/PHACTR1/LZTS1/MAP1B/EPHA2/EXT1/CRB2/GBX2/GBA/NTRK3/PTCH1/RASGRF1/GNAT1/MANF/RAB3A/LRP8/GLI2/CXCL12/SPOCK1/UNC5B/DPYSL5/LIN28A/ROR2/NTF3/WNT5A/YWHAH/PTK2B/WNT2B/LBX1/GPM6B/SEMA4D/RTN4R/GAP43/MEGF8/GAS7/EPHB3/ATCAY/NEPRO/CDH11/HEY1/SEMA4F/DLL4/FES/GLDN/BCL6/CDHR1/PDE6C/CPNE5/VEGFD/ETV1/DPYSL2/FGFR2/HECW2/SYT17/PROX1/LMX1A/SEMA6D/EPHA1/NOG/SRCIN1/PTK7/PRKN/DBX1/SRF/NTF…	155
Genes marked with distal H3K27me3	GO:0048858	cell projection morphogenesis	78/2568	168/8043	5.16476e-05	0.018171	0.018017	SEMA3G/RTN4/PHACTR1/LZTS1/MAP1B/EPHA2/EXT1/GBX2/RAB3A/LRP8/GLI2/CXCL12/UNC5B/DPYSL5/NTF3/WNT5A/YWHAH/ENPP2/SEMA4D/RTN4R/GAP43/MEGF8/GAS7/EPHB3/CDH11/SEMA4F/CPNE5/ETV1/DPYSL2/FGFR2/HECW2/SYT17/LMX1A/SEMA6D/EPHA1/NOG/SRCIN1/PLEKHO1/PRKN/SRF/NTF4/CHODL/DCX/LHX2/WNT7A/GBX1/NUMB/PTPN11/NR2E1/PLXNB3/RAB11A/SGK1/PTPRZ1/SIN3A/NRP1/EFNB3/ZFYVE27/CHL1/MEF2A/GDF7/ABL1/NFIB/SLITRK3/TAOK1/RND2/LGI1/PAFAH1B1/S…	78
Genes marked with distal H3K27me3	GO:0120039	plasma membrane bounded cell projection morphogenesis	78/2568	168/8043	5.16476e-05	0.018171	0.018017	SEMA3G/RTN4/PHACTR1/LZTS1/MAP1B/EPHA2/EXT1/GBX2/RAB3A/LRP8/GLI2/CXCL12/UNC5B/DPYSL5/NTF3/WNT5A/YWHAH/ENPP2/SEMA4D/RTN4R/GAP43/MEGF8/GAS7/EPHB3/CDH11/SEMA4F/CPNE5/ETV1/DPYSL2/FGFR2/HECW2/SYT17/LMX1A/SEMA6D/EPHA1/NOG/SRCIN1/PLEKHO1/PRKN/SRF/NTF4/CHODL/DCX/LHX2/WNT7A/GBX1/NUMB/PTPN11/NR2E1/PLXNB3/RAB11A/SGK1/PTPRZ1/SIN3A/NRP1/EFNB3/ZFYVE27/CHL1/MEF2A/GDF7/ABL1/NFIB/SLITRK3/TAOK1/RND2/LGI1/PAFAH1B1/S…	78
Genes marked with distal H3K27me3	GO:0048812	neuron projection morphogenesis	76/2568	163/8043	5.37811e-05	0.018171	0.018017	SEMA3G/RTN4/PHACTR1/LZTS1/MAP1B/EPHA2/EXT1/GBX2/RAB3A/LRP8/GLI2/CXCL12/UNC5B/DPYSL5/NTF3/WNT5A/YWHAH/SEMA4D/RTN4R/GAP43/MEGF8/GAS7/EPHB3/CDH11/SEMA4F/CPNE5/ETV1/DPYSL2/FGFR2/HECW2/SYT17/LMX1A/SEMA6D/EPHA1/NOG/SRCIN1/PRKN/SRF/NTF4/CHODL/DCX/LHX2/WNT7A/GBX1/NUMB/PTPN11/NR2E1/PLXNB3/RAB11A/SGK1/PTPRZ1/SIN3A/NRP1/EFNB3/ZFYVE27/CHL1/MEF2A/GDF7/ABL1/NFIB/SLITRK3/TAOK1/RND2/LGI1/PAFAH1B1/SIPA1L1/UCHL1/P…	76
Genes marked with distal H3K27me3	GO:0032989	cellular component morphogenesis	94/2568	210/8043	5.44784e-05	0.018171	0.018017	SEMA3G/RTN4/PHACTR1/LZTS1/MAP1B/EPHA2/EXT1/GBX2/NEBL/RAB3A/LRP8/GLI2/CXCL12/UNC5B/DPYSL5/NTF3/WNT5A/YWHAH/ENPP2/CAPN3/SEMA4D/RTN4R/GAP43/MEGF8/GAS7/EPHB3/CDH11/SEMA4F/CPNE5/ETV1/DPYSL2/FGFR2/NCMAP/HECW2/SYT17/PROX1/LMX1A/SEMA6D/EPHA1/NOG/SRCIN1/PLEKHO1/MYOZ2/PRKN/SRF/NTF4/CHODL/DCX/LHX2/WNT7A/GBX1/NUMB/PTPN11/NR2E1/PLXNB3/RAB11A/SGK1/PTPRZ1/TMOD2/SIN3A/NRP1/EFNB3/ZFYVE27/MTM1/CHL1/MEF2A/TBC1D20/G…	94
Genes marked with distal H3K27me3	GO:0000904	cell morphogenesis involved in differentiation	88/2568	196/8043	8.1627e-05	0.0249575	0.0247459	SEMA3G/NEDD9/RTN4/TYRO3/PHACTR1/LZTS1/MAP1B/EPHA2/EXT1/GBX2/RAB25/RAB3A/LRP8/GLI2/CXCL12/UNC5B/DPYSL5/ANTXR1/WNT5A/OLFM4/YWHAH/VPS33A/SEMA4D/RTN4R/GAP43/MEGF8/EPHB3/CDH11/SEMA4F/CDHR1/ETV1/BVES/VSIG1/DPYSL2/FGFR2/HECW2/PROX1/LMX1A/SEMA6D/EPHA1/NOG/SRCIN1/ST14/SRF/CHODL/CLRN1/DCX/LHX2/WNT7A/GBX1/NUMB/PTPN11/BBS1/NR2E1/PLXNB3/RAB11A/PTPRZ1/SIN3A/NRP1/EFNB3/ZFYVE27/CASS4/MET/CHL1/GATA1/MEF2A/TBC1D20…	88
Genes marked with distal H3K27me3	GO:0022008	neurogenesis	184/2568	460/8043	0.000103151	0.0291125	0.0288656	SEMA3G/CCR4/RUNX1/TRIM32/SLC8A3/CDH23/RTN4/PHACTR1/LZTS1/MAP1B/EPHA2/EXT1/TNR/GPR183/CRB2/GBX2/GBA/NTRK3/PTCH1/RASGRF1/GNAT1/MANF/DCT/OPALIN/RAB3A/LRP8/GLI2/CXCL12/SPOCK1/UNC5B/DPYSL5/LIN28A/ROR2/ACSL6/NTF3/WNT5A/YWHAH/PTK2B/WNT2B/GNRH1/LBX1/GPM6B/SEMA4D/RTN4R/GAP43/MEGF8/GAS7/EPHB3/ATCAY/NEPRO/CDH11/HEY1/SEMA4F/DLL4/FES/GLDN/BCL6/CDHR1/ETV6/BARHL1/AKNA/PDE6C/CPNE5/VEGFD/ETV1/BHLHE40/DPYSL2/FGFR2…	184

## Sheet: Fig. S5H
Supplemental Table S3. Gene Ontology enrichment for gene clusters, distal H3K27me3-marked genes and bivalent genes
Cluster	ID	Description	GeneRatio	BgRatio	pvalue	p.adjust	qvalue	geneID	Count
MII_only	GO:0060429	epithelium development	60/720	317/8043	1.20187e-08	3.75463e-05	3.48035e-05	ESR1/TBX18/SMAD7/SIX4/CRB2/ADAMTSL2/WT1/RHOB/IVL/LOC106510158/SOX10/LOC106506651/HOXC13/ITGA5/CDKN1B/NTN4/TGFB1/EPHA2/HEYL/MYCL/DSP/SRF/FOXA1/NKX2-1/RGMA/RBPJ/KDR/AREG/DSPP/TPP1/PDE2A/PLET1/PTCH1/ETV4/KRT36/KRT25/RARA/HOXB2/HOXB5/HOXB7/NOG/FOXL2/RIPK4/S1PR3/ROR2/NKX3-1/STC1/RILPL1/IL31/IGFBP5/MARVELD2/NKX6-3/TCF15/PPP1R16B/HNF4A/CTSZ/TBX20/DLG3/ZIC3/NRARP	60
MII_only	GO:0009887	animal organ morphogenesis	59/720	319/8043	3.83612e-08	5.99201e-05	5.55429e-05	ESR1/TNFAIP3/SMAD7/ACTC1/SIX4/CRB2/PHLDA2/FGF4/WT1/AQP5/HOXC13/HOXC4/FGF6/NTN4/TGFB1/NTF4/EPHA2/HEYL/DSP/CDSN/SRF/FOXA1/NKX2-1/RBPJ/NPY1R/NPY5R/AREG/C8H4orf26/NPY2R/DSPP/THY1/GNGT1/GREM2/PTCH1/RARA/HOXB1/HOXB2/HOXB5/HOXB7/NOG/RFLNB/LTF/FOXL2/ROR2/NKX3-1/STC1/ACTA2/DLX2/HOXD3/IGFBP5/NPPC/FOXI1/VSX1/TCF15/CTSZ/TSPAN12/TBX20/HOXA9/ZIC3	59
MII_only	GO:0048729	tissue morphogenesis	41/720	199/8043	2.58211e-07	0.000268884	0.000249242	ESR1/TBX18/SMAD7/ACTC1/SIX4/CRB2/WT1/RHOB/SOX10/LOC106506651/ITGA5/NTN4/TGFB1/EPHA2/HEYL/SRF/FOXA1/NKX2-1/RGMA/RBPJ/KDR/AREG/PLET1/PTCH1/KRT25/RARA/HOXB2/HOXB7/NOG/RIPK4/ROR2/NKX3-1/STC1/ACTA2/IGFBP5/TCF15/CTSZ/TBX20/DLG3/ZIC3/NRARP	41
MII_only	GO:0007167	enzyme linked receptor protein signaling pathway	57/720	326/8043	4.76085e-07	0.000336193	0.000311634	SMAD7/NDN/CRB2/ENG/ADAMTSL2/FGF4/EFNA2/MZB1/VASN/TMEM204/SLA/HFE2/NTF3/FGF6/TGFB1/NTF4/NPPA/NPPB/EPHA2/LEPR/LOC100152566/NEDD9/FAM83B/VEGFA/NKX2-1/EFS/RGMA/RBPJ/KDR/EREG/AREG/PDZD3/GRB10/EGFR/GREM2/EFNB2/SOST/IGFBP4/NOG/EPHB3/ROR2/NKX3-1/PTK2B/HPGD/IGFBP2/IGFBP5/INHA/PID1/NPPC/PLAT/LOC100525721/PMEPA1/LEP/TBX20/IGFBP3/CITED1/CHRDL1	57
MII_only	GO:0009952	anterior/posterior pattern specification	21/720	71/8043	5.38081e-07	0.000336193	0.000311634	TBX18/CRB2/WT1/HOXC13/HOXC6/HOXC4/SRF/RBPJ/HOXB1/HOXB2/HOXB5/HOXB7/NOG/BHLHE40/ROR2/NKX3-1/HOXD3/TCF15/HOXA9/ZIC3/NRARP	21
MII_only	GO:0002009	morphogenesis of an epithelium	35/720	164/8043	8.23209e-07	0.000423713	0.000392761	ESR1/TBX18/SIX4/WT1/RHOB/SOX10/LOC106506651/ITGA5/NTN4/TGFB1/EPHA2/SRF/FOXA1/NKX2-1/RGMA/RBPJ/KDR/AREG/PLET1/PTCH1/KRT25/RARA/HOXB2/HOXB7/NOG/RIPK4/ROR2/NKX3-1/IGFBP5/TCF15/CTSZ/TBX20/DLG3/ZIC3/NRARP	35
MII_only	GO:0003002	regionalization	28/720	117/8043	9.49421e-07	0.000423713	0.000392761	TBX18/CRB2/WT1/HOXC13/HOXC6/HOXC4/NTF4/SRF/FOXA1/NKX2-1/RBPJ/PTCH1/HOXB1/HOXB2/HOXB5/HOXB7/NOG/BHLHE40/ROR2/NKX3-1/EGR2/DLX2/HOXD3/TCF15/TBX20/HOXA9/ZIC3/NRARP	28
MII_only	GO:0007186	G protein-coupled receptor signaling pathway	59/720	357/8043	2.05972e-06	0.000804321	0.000745565	ESR1/CGA/CNR1/GABRA5/GAL/LOC100519181/LPAR2/C3/ADRA2B/GPR45/PROKR1/GPR20/OPRK1/MCHR1/RAC2/SSTR3/PTHLH/GALP/NPPA/NPPB/GPR3/OPRD1/HCRTR1/EDN1/HCRTR2/GLP1R/BDKRB2/BDKRB1/DRD5/CCKAR/GLRB/NPY1R/P2RY2/DRD2/KISS1/AVPR1B/GNGT1/RGS8/GPR12/GRK1/SSTR2/CCL1/CCL2/S1PR3/PTK2B/HPGD/GPR26/ADRB3/DRD1/PROKR2/ADRA1D/PDYN/MC3R/GPR37/GHRHR/GLRA4/LOC100513516/LOC494564/LOC100152197	59
MII_only	GO:0048646	anatomical structure formation involved in morphogenesis	61/720	375/8043	2.35782e-06	0.000818425	0.000758638	TNFAIP3/TBX18/SPACA1/NR2E1/ACTC1/SIX4/CRB2/ANGPTL2/ENG/MYMK/WT1/RHOB/CASQ1/CD53/PROK1/ITGA5/CD9/CBLN1/TYROBP/TGFB1/FUT1/NTF4/EPHA2/HEYL/LEPR/DSP/SRF/VEGFA/ANPEP/FOXA1/NKX2-1/CFL2/RGMA/VASH1/RBPJ/KDR/C8H4orf26/DSPP/THY1/ADAMTS15/PTCH1/RARA/HOXB1/NOG/EPHB3/SYK/ROR2/NKX3-1/PTK2B/EGR2/ACKR3/ANGPT4/TCF15/PPP1R16B/LEP/TSPAN12/TBX20/BMPER/AQP1/CXCR3/NRARP	61
MII_only	GO:0022610	biological adhesion	72/720	473/8043	3.5281e-06	0.00110218	0.00102166	SMAD7/AKNA/CRB2/ENG/JAK3/ICAM4/VCAN/CLDN6/RHOB/KIRREL/PEAR1/BCAN/S100A8/RAC2/NUAK1/ITGA5/CD9/AMIGO2/NTN4/CBLN1/TGFB1/FUT1/TNFRSF4/MXRA8/EPHA2/LOC100152566/NEDD9/RIPOR2/SRF/VEGFA/ACAN/HAPLN3/EFS/KDR/IL15/SPP1/SPARCL1/PLET1/THY1/CD34/LOC100155738/OLFM4/ITGB3/ITGA2B/JUP/SRCIN1/LTF/CLDN18/CLDN11/EPHB3/IL1RAP/SYK/DMTN/PTK2B/CXCR4/CLDN22/ITGB6/DPP4/HOXD3/IGFBP2/EPHA4/CD93/SIGLEC1/BPIFA1/LEP/DLG3/CXCR3/…	72
MII_only	GO:0007155	cell adhesion	70/720	464/8043	6.69632e-06	0.00190175	0.00176283	SMAD7/AKNA/CRB2/ENG/JAK3/ICAM4/VCAN/CLDN6/RHOB/KIRREL/PEAR1/BCAN/S100A8/RAC2/NUAK1/ITGA5/CD9/AMIGO2/NTN4/CBLN1/TGFB1/FUT1/TNFRSF4/MXRA8/EPHA2/LOC100152566/NEDD9/RIPOR2/SRF/VEGFA/ACAN/HAPLN3/EFS/KDR/IL15/SPP1/SPARCL1/PLET1/THY1/CD34/LOC100155738/OLFM4/ITGB3/ITGA2B/JUP/SRCIN1/CLDN18/CLDN11/EPHB3/IL1RAP/SYK/DMTN/PTK2B/CXCR4/CLDN22/ITGB6/DPP4/HOXD3/IGFBP2/EPHA4/CD93/SIGLEC1/LEP/DLG3/CXCR3/PCDH11X/GPC…	70
MII_only	GO:0007389	pattern specification process	29/720	136/8043	7.32639e-06	0.0019073	0.00176797	TBX18/CRB2/WT1/HOXC13/HOXC6/HOXC4/NTF4/SRF/FOXA1/NKX2-1/RBPJ/PTCH1/HOXB1/HOXB2/HOXB5/HOXB7/NOG/BHLHE40/ROR2/NKX3-1/STC1/EGR2/DLX2/HOXD3/TCF15/TBX20/HOXA9/ZIC3/NRARP	29
MII_only	GO:0051216	cartilage development	20/720	78/8043	1.12845e-05	0.00271176	0.00251366	SMAD7/FGF4/HOXC4/PTHLH/FGF6/TGFB1/COL11A2/SRF/CYTL1/RARA/NOG/RFLNB/RUNX1/ROR2/STC1/RFLNA/DLX2/HOXD3/NPPC/C15H2orf82	20
MII_only	GO:0050877	nervous system process	46/720	272/8043	1.54377e-05	0.00344482	0.00319317	NR2E1/GATM/GABRA5/NDN/BARHL1/OBP2B/DBH/LOC100519181/P2RX3/CACNG3/SCNN1B/SCNN1G/OPRK1/LMX1A/ITGA5/PDE6H/CDKN1B/NTF3/CBLN1/NTF4/DCDC2/RIPOR2/COL11A2/SRF/CLIC5/SLC8A3/DRD5/GLRB/NPY1R/TPP1/CNGA4/GRK1/CCL2/EGR2/RGR/CHRND/OTOS/MARVELD2/VSX1/PDYN/TCF15/GLRA4/LOC100513516/GABRQ/LOC494564/LOC100152197	46
MII_only	GO:0035239	tube morphogenesis	47/720	281/8043	1.68053e-05	0.00349998	0.0032443	ESR1/NR2E1/SMAD7/SIX4/ANGPTL2/ENG/WT1/RHOB/PROK1/ITGA5/TGFB1/FUT1/EPHA2/LEPR/SRF/VEGFA/ANPEP/FOXA1/NKX2-1/RGMA/VASH1/RBPJ/KDR/AREG/THY1/PTCH1/RARA/HOXB7/NOG/EPHB3/SYK/NKX3-1/PTK2B/HPGD/ACKR3/ANGPT4/PPP1R16B/CTSZ/LEP/TSPAN12/TBX20/BMPER/AQP1/CXCR3/CITED1/ZIC3/NRARP	47
MII_only	GO:0061448	connective tissue development	23/720	102/8043	2.49912e-05	0.00487954	0.00452308	SMAD7/FGF4/WT1/HOXC4/PTHLH/FGF6/TGFB1/COL11A2/SRF/FOXA1/CYTL1/RARA/NOG/RFLNB/RUNX1/ROR2/STC1/RFLNA/SELENOM/DLX2/HOXD3/NPPC/C15H2orf82	23
MII_only	GO:0001501	skeletal system development	30/720	157/8043	4.82933e-05	0.0088746	0.00822631	SMAD7/SIX4/FGF4/HOXC6/HOXC4/PTHLH/FGF6/TGFB1/EPHA2/COL11A2/SRF/CYTL1/RARA/HOXB1/HOXB2/HOXB5/HOXB7/NOG/RFLNB/LTF/RUNX1/ROR2/STC1/RFLNA/DLX2/HOXD3/NPPC/C15H2orf82/TCF15/HOXA9	30
MII_only	GO:0007423	sensory organ development	29/720	150/8043	5.1473e-05	0.00893342	0.00828083	NR2E1/SIX4/CRB2/WT1/AQP5/HOXC13/CDKN1B/CEBPA/TGFB1/NTF4/EPHA2/MYCL/SRF/CYTL1/RBPJ/THY1/GNGT1/RARA/NOG/FOXL2/ROR2/VAX1/DLX2/FOXI1/VSX1/TCF15/TSPAN12/NDP/CHRDL1	29
MII_only	GO:0035295	tube development	52/720	338/8043	6.35169e-05	0.0104435	0.00968061	ESR1/TBX18/NR2E1/SMAD7/SIX4/ANGPTL2/ENG/ADAMTSL2/WT1/RHOB/PROK1/ITGA5/CEBPA/TGFB1/FUT1/EPHA2/HEYL/LEPR/SRF/VEGFA/ANPEP/FOXA1/NKX2-1/RGMA/VASH1/RBPJ/KDR/AREG/THY1/PTCH1/RARA/HOXB7/NOG/EPHB3/SYK/NKX3-1/PTK2B/HPGD/IGFBP5/ACKR3/ANGPT4/PPP1R16B/CTSZ/LEP/TSPAN12/TBX20/BMPER/AQP1/CXCR3/CITED1/ZIC3/NRARP	52
MII_only	GO:0048705	skeletal system morphogenesis	19/720	82/8043	8.46368e-05	0.0132203	0.0122545	SIX4/FGF4/HOXC4/FGF6/RARA/HOXB1/HOXB2/HOXB5/HOXB7/NOG/RFLNB/LTF/ROR2/STC1/DLX2/HOXD3/NPPC/TCF15/HOXA9	19
MII_only	GO:0048514	blood vessel morphogenesis	35/720	203/8043	0.00010781	0.0158028	0.0146484	NR2E1/SMAD7/ANGPTL2/ENG/WT1/RHOB/PROK1/ITGA5/TGFB1/FUT1/EPHA2/LEPR/SRF/VEGFA/ANPEP/VASH1/RBPJ/KDR/THY1/NOG/EPHB3/SYK/PTK2B/HPGD/ACKR3/ANGPT4/PPP1R16B/LEP/TSPAN12/TBX20/BMPER/AQP1/CXCR3/CITED1/NRARP	35
MII_only	GO:0072359	circulatory system development	50/720	328/8043	0.000111288	0.0158028	0.0146484	TBX18/NR2E1/SMAD7/ACTC1/CRB2/ANGPTL2/ENG/WT1/TMEM204/RHOB/PROK1/ITGA5/CDKN1B/DUSP6/TGFB1/FUT1/EPHA2/HEYL/LEPR/SRF/VEGFA/ANPEP/VASH1/RBPJ/KDR/NPY1R/NPY5R/NPY2R/THY1/PTCH1/RARA/NOG/EPHB3/SYK/NKX3-1/PTK2B/HPGD/ACKR3/ANGPT4/PPP1R16B/LEP/TSPAN12/TBX20/BMPER/AQP1/NDP/CXCR3/CITED1/ZIC3/NRARP	50
MII_only	GO:0048754	branching morphogenesis of an epithelial tube	17/720	72/8043	0.000154677	0.0210091	0.0194744	ESR1/SIX4/WT1/TGFB1/EPHA2/SRF/FOXA1/NKX2-1/KDR/AREG/PTCH1/HOXB7/NOG/NKX3-1/CTSZ/TBX20/NRARP	17
MII_only	GO:0007267	cell-cell signaling	67/720	484/8043	0.00016576	0.0213365	0.0197779	TNFAIP3/TBX18/CNR1/NR2E1/GABRA5/GAL/P2RX3/SYT13/WNT3A/TFR2/CACNG3/SYT17/SDC1/PANX2/SYNGR1/SSTR3/NTF3/CBLN1/FFAR2/NTF4/DCDC2/TNF/SRF/FOXA1/NDRG2/SV2B/SLC8A3/BDKRB2/DRD5/RBPJ/CCKAR/GLRB/NPY5R/TLR2/SPP1/WNT11/DRD2/KCNJ5/GRB10/SSTR2/GFAP/SOST/GIP/NOG/CCL2/IL1RAP/SYK/ROR2/NKX3-1/SELENOM/MIF/CTBP2/DLGAP2/CHRND/ADRA1D/PDYN/HNF4A/KCNB1/LEP/GCK/NDP/PORCN/DRP2/GLRA4/GPC4/GABRQ/NRARP	67
MII_only	GO:0048704	embryonic skeletal system morphogenesis	10/720	30/8043	0.000177577	0.0213365	0.0197779	SIX4/HOXC4/HOXB1/HOXB2/HOXB5/HOXB7/NOG/DLX2/HOXD3/HOXA9	10
MII_only	GO:0061053	somite development	10/720	30/8043	0.000177577	0.0213365	0.0197779	TBX18/SIX4/CRB2/RBPJ/PTCH1/NOG/ROR2/NKX3-1/TCF15/NRARP	10
MII_only	GO:0001944	vasculature development	38/720	233/8043	0.000185156	0.0214232	0.0198582	NR2E1/SMAD7/ANGPTL2/ENG/WT1/TMEM204/RHOB/PROK1/ITGA5/TGFB1/FUT1/EPHA2/LEPR/SRF/VEGFA/ANPEP/VASH1/RBPJ/KDR/THY1/NOG/EPHB3/SYK/NKX3-1/PTK2B/HPGD/ACKR3/ANGPT4/PPP1R16B/LEP/TSPAN12/TBX20/BMPER/AQP1/NDP/CXCR3/CITED1/NRARP	38
MII_only	GO:0048568	embryonic organ development	26/720	139/8043	0.000217497	0.0236731	0.0219437	SIX4/CRB2/PHLDA2/HOXC4/CEBPA/TGFB1/EPHA2/SRF/RBPJ/PTCH1/RARA/HOXB1/HOXB2/HOXB5/HOXB7/NOG/FOXL2/ROR2/DLX2/HOXD3/FOXI1/EN2/TBX20/HOXA9/CITED1/ZIC3	26
MII_only	GO:0007417	central nervous system development	38/720	235/8043	0.000221606	0.0236731	0.0219437	NR2E1/NDN/AKNA/BARHL1/CAPG/LMX1A/BCAN/S100A8/SOX10/CBLN1/TGFB1/FUT1/MXRA8/SRF/NKX2-1/SLC8A3/RBPJ/CCKAR/PTCH1/GFAP/HOXB1/HOXB2/NOG/ZIC1/EPHB3/OLIG1/DPYSL2/EGR2/VAX1/CXCR4/DLX2/LOC100525721/EN2/TBX20/AQP1/CITED1/POU3F4/ZIC3	38
MII_only	GO:0090287	regulation of cellular response to growth factor stimulus	18/720	81/8043	0.000227334	0.0236731	0.0219437	SMAD7/CRB2/ENG/ADAMTSL2/FGF4/VASN/TMEM204/TGFB1/NKX2-1/RGMA/RBPJ/GRB10/GREM2/SOST/NOG/PMEPA1/TBX20/CHRDL1	18
MII_only	GO:0048706	embryonic skeletal system development	11/720	37/8043	0.000267249	0.0260997	0.0241931	SIX4/HOXC6/HOXC4/HOXB1/HOXB2/HOXB5/HOXB7/NOG/DLX2/HOXD3/HOXA9	11
MII_only	GO:0001763	morphogenesis of a branching structure	19/720	89/8043	0.000267347	0.0260997	0.0241931	ESR1/SIX4/WT1/NTN4/TGFB1/EPHA2/SRF/FOXA1/NKX2-1/KDR/AREG/PTCH1/HOXB7/NOG/NKX3-1/DLX2/CTSZ/TBX20/NRARP	19
MII_only	GO:0007169	transmembrane receptor protein tyrosine kinase signaling pathway	35/720	214/8043	0.000311591	0.0288174	0.0267122	NDN/FGF4/EFNA2/MZB1/TMEM204/SLA/NTF3/FGF6/TGFB1/NTF4/EPHA2/LEPR/NEDD9/FAM83B/VEGFA/EFS/RBPJ/KDR/EREG/AREG/GRB10/EGFR/EFNB2/IGFBP4/NOG/EPHB3/ROR2/NKX3-1/PTK2B/IGFBP2/IGFBP5/PID1/PLAT/LEP/IGFBP3	35
MII_only	GO:0061138	morphogenesis of a branching epithelium	18/720	83/8043	0.000313633	0.0288174	0.0267122	ESR1/SIX4/WT1/NTN4/TGFB1/EPHA2/SRF/FOXA1/NKX2-1/KDR/AREG/PTCH1/HOXB7/NOG/NKX3-1/CTSZ/TBX20/NRARP	18
MII_only	GO:0001568	blood vessel development	36/720	223/8043	0.00033299	0.0297218	0.0275506	NR2E1/SMAD7/ANGPTL2/ENG/WT1/RHOB/PROK1/ITGA5/TGFB1/FUT1/EPHA2/LEPR/SRF/VEGFA/ANPEP/VASH1/RBPJ/KDR/THY1/NOG/EPHB3/SYK/NKX3-1/PTK2B/HPGD/ACKR3/ANGPT4/PPP1R16B/LEP/TSPAN12/TBX20/BMPER/AQP1/CXCR3/CITED1/NRARP	36
MII_only	GO:0022008	neurogenesis	63/720	460/8043	0.00035086	0.0304468	0.0282227	CNR1/NR2E1/NDN/OTX2/SIX4/AKNA/CRB2/BARHL1/SYT17/ADRA2B/LMX1A/S100A8/SOX10/NTF3/NTN4/CBLN1/TGFB1/NTF4/MXRA8/DISP3/EPHA2/HEYL/MYCL/BEND6/CPNE5/SRF/VEGFA/FOXA1/NKX2-1/RGMA/SLC8A3/RBPJ/CCKAR/THY1/GNGT1/PTCH1/GFAP/SRCIN1/NOG/CCL2/CCK/MANF/BHLHE40/EPHB3/OLIG1/RUNX1/ROR2/DPYSL2/STMN4/PTK2B/EGR2/VAX1/CXCR4/DLX2/HOXD3/HECW2/ITM2C/EFHD1/VSX1/LOC100525721/EN2/TBX20/PLXNB3	63
MII_only	GO:0060562	epithelial tube morphogenesis	22/720	113/8043	0.000365083	0.0308249	0.0285731	ESR1/SIX4/WT1/RHOB/TGFB1/EPHA2/SRF/FOXA1/NKX2-1/RGMA/RBPJ/KDR/AREG/PTCH1/RARA/HOXB7/NOG/NKX3-1/CTSZ/TBX20/ZIC3/NRARP	22
MII_only	GO:0001837	epithelial to mesenchymal transition	14/720	57/8043	0.000376426	0.0309461	0.0286855	SMAD7/AKNA/CRB2/ENG/VASN/TGFB1/HEYL/LOC100152566/FOXA1/NKX2-1/RBPJ/NOG/RFLNB/TBX20	14
MII_only	GO:0045595	regulation of cell differentiation	64/720	474/8043	0.000466901	0.0365829	0.0339105	NR2E1/SMAD7/SIX4/CRB2/VASN/ADRA2B/TCF23/LMX1A/PTHLH/CDKN1B/NTF3/CEBPA/TGFB1/NTF4/DISP3/GPR3/HEYL/MYCL/LOC100152566/NEDD9/TNF/BEND6/SRF/FOXA1/NKX2-1/RBPJ/THY1/RAB7B/C9H1orf186/PTCH1/MEDAG/OLFM4/GFAP/ETV4/KRT36/RARA/NOG/RFLNB/LTF/BHLHE40/RUNX1/S1PR3/DMTN/DPYSL2/PTK2B/RFLNA/MMP11/EGR2/VAX1/DLX2/HOXD3/CASP8/IGFBP5/NPPC/NKX6-3/TCF15/LOC100525721/LEP/TBX20/HOXA9/IGFBP3/CITED1/PLXNB3/NRARP	64
MII_only	GO:0070848	response to growth factor	33/720	202/8043	0.000468411	0.0365829	0.0339105	SMAD7/NDN/CRB2/ENG/ADAMTSL2/FGF4/VASN/TMEM204/HFE2/NTF3/FGF6/TGFB1/NTF4/EPHA2/HEYL/LOC100152566/VEGFA/NKX2-1/RGMA/RBPJ/KDR/GRB10/GREM2/SOST/NOG/CCL2/ROR2/HPGD/LOC100525721/PMEPA1/TBX20/CITED1/CHRDL1	33
MII_only	GO:0030279	negative regulation of ossification	6/720	13/8043	0.000499119	0.0378948	0.0351266	SMAD7/TGFB1/RBPJ/SOST/RFLNB/PTK2B	6
MII_only	GO:0030510	regulation of BMP signaling pathway	9/720	28/8043	0.00050947	0.0378948	0.0351266	SMAD7/CRB2/RGMA/RBPJ/GREM2/SOST/NOG/TBX20/CHRDL1	9
MII_only	GO:0001654	eye development	18/720	87/8043	0.000574434	0.0407848	0.0378055	NR2E1/CRB2/WT1/AQP5/CDKN1B/TGFB1/EPHA2/SRF/THY1/GNGT1/RARA/FOXL2/VAX1/DLX2/VSX1/TSPAN12/NDP/CHRDL1	18
MII_only	GO:0150063	visual system development	18/720	87/8043	0.000574434	0.0407848	0.0378055	NR2E1/CRB2/WT1/AQP5/CDKN1B/TGFB1/EPHA2/SRF/THY1/GNGT1/RARA/FOXL2/VAX1/DLX2/VSX1/TSPAN12/NDP/CHRDL1	18
MII_only	GO:0051093	negative regulation of developmental process	40/720	264/8043	0.000604547	0.0411089	0.0381058	NR2E1/SMAD7/SIX4/WT1/VASN/TCF23/LMX1A/CDKN1B/CBLN1/TGFB1/DISP3/EPHA2/GPR3/FOXA1/NKX2-1/RGMA/VASH1/RBPJ/THY1/PTCH1/RARA/NOG/RFLNB/LTF/S1PR3/DMTN/NKX3-1/PTK2B/MIF/MMP11/VAX1/DLX2/IGFBP5/NPPC/NKX6-3/CST3/TCF15/HOXA9/CITED1/NRARP	40
MII_only	GO:0031589	cell-substrate adhesion	20/720	102/8043	0.000605316	0.0411089	0.0381058	RAC2/ITGA5/NTN4/FUT1/LOC100152566/NEDD9/SRF/VEGFA/KDR/PLET1/THY1/OLFM4/ITGB3/SRCIN1/EPHB3/DMTN/PTK2B/ITGB6/HOXD3/CD93	20
MII_only	GO:0071363	cellular response to growth factor stimulus	32/720	197/8043	0.000628844	0.041798	0.0387447	SMAD7/NDN/CRB2/ENG/ADAMTSL2/FGF4/VASN/TMEM204/HFE2/NTF3/FGF6/TGFB1/NTF4/HEYL/LOC100152566/VEGFA/NKX2-1/RGMA/RBPJ/KDR/GRB10/GREM2/SOST/NOG/CCL2/ROR2/HPGD/LOC100525721/PMEPA1/TBX20/CITED1/CHRDL1	32
MII_only	GO:0001525	angiogenesis	29/720	173/8043	0.000662988	0.0431495	0.0399974	NR2E1/ANGPTL2/ENG/RHOB/PROK1/ITGA5/FUT1/EPHA2/LEPR/SRF/VEGFA/ANPEP/VASH1/RBPJ/KDR/THY1/EPHB3/SYK/PTK2B/ACKR3/ANGPT4/PPP1R16B/LEP/TSPAN12/TBX20/BMPER/AQP1/CXCR3/NRARP	29
MII_only	GO:0042060	wound healing	23/720	126/8043	0.000706148	0.0450205	0.0417318	PLG/SERPING1/ADRA2B/SDC1/ARFGEF1/PEAR1/ITGA5/CD9/F13A1/SRF/DRD5/KDR/LOC100520680/FGG/PLET1/F7/ITGB3/SLC4A1/NOG/SYK/DMTN/CD40LG/HMOX1	23
MII_only	GO:0009611	response to wounding	25/720	142/8043	0.000735909	0.0459796	0.0426208	PLG/SERPING1/ADRA2B/SDC1/ARFGEF1/PEAR1/ITGA5/CD9/TGFB1/F13A1/SRF/RGMA/DRD5/KDR/LOC100520680/FGG/PLET1/F7/ITGB3/SLC4A1/NOG/SYK/DMTN/CD40LG/HMOX1	25
MII_only	GO:0007178	transmembrane receptor protein serine/threonine kinase signaling pathway	22/720	119/8043	0.000766416	0.0469467	0.0435172	SMAD7/CRB2/ENG/ADAMTSL2/VASN/HFE2/TGFB1/LOC100152566/NKX2-1/RGMA/RBPJ/GREM2/SOST/NOG/ROR2/HPGD/INHA/LOC100525721/PMEPA1/TBX20/CITED1/CHRDL1	22
Mo_only	GO:0006412	translation	61/502	283/8043	2.12145e-18	6.1713e-15	6.07181e-15	RPS12/RPLP1/RPS29/RPS6/RPL35/RPS13/MRPL55/RACK1/RPS28/ELAVL1/RPL36/EEF2/RPS15/RPS23/RPL31/RPS27A/RPS7/RPL8/RPS20/RPS27/RPL5/RPL3/RPS26/RPL13/RPL13A/RPS5/RPL22/RPL11/LIN28A/RPS8/RPL10A/RPS17/RPL9/RPS3A/RPL34/RPS3/NARS2/FAM129A/LOC100738684/RPL21/UNK/RPL38/RPL27/RPL23/RPL23A/EIF5A/EIF4A1/RPL26/RPL15/RPSA/RPL32/EIF4A2/RPL35A/RPL6/RPLP0/RPS24/EEF1B2/RARS/RPS21/RPS4X/RPL10	61
Mo_only	GO:0043043	peptide biosynthetic process	61/502	291/8043	9.04235e-18	1.31521e-14	1.29401e-14	RPS12/RPLP1/RPS29/RPS6/RPL35/RPS13/MRPL55/RACK1/RPS28/ELAVL1/RPL36/EEF2/RPS15/RPS23/RPL31/RPS27A/RPS7/RPL8/RPS20/RPS27/RPL5/RPL3/RPS26/RPL13/RPL13A/RPS5/RPL22/RPL11/LIN28A/RPS8/RPL10A/RPS17/RPL9/RPS3A/RPL34/RPS3/NARS2/FAM129A/LOC100738684/RPL21/UNK/RPL38/RPL27/RPL23/RPL23A/EIF5A/EIF4A1/RPL26/RPL15/RPSA/RPL32/EIF4A2/RPL35A/RPL6/RPLP0/RPS24/EEF1B2/RARS/RPS21/RPS4X/RPL10	61
Mo_only	GO:0043604	amide biosynthetic process	64/502	355/8043	3.40062e-15	3.29747e-12	3.24431e-12	RPS12/RPLP1/RPS29/RPS6/RPL35/RPS13/MRPL55/RACK1/RPS28/ELAVL1/RPL36/EEF2/RPS15/RPS23/ACSL6/RPL31/RPS27A/RPS7/RPL8/RPS20/RPS27/RPL5/RPL3/RPS26/RPL13/RPL13A/RPS5/RPL22/RPL11/LIN28A/RPS8/RPL10A/RPS17/RPL9/RPS3A/RPL34/RPS3/NARS2/FAM129A/LOC100738684/RPL21/UNK/RPL38/RPL27/RPL23/RPL23A/EIF5A/EIF4A1/RPL26/RPL15/RPSA/RPL32/EIF4A2/RPL35A/P2RX7/RPL6/RPLP0/RPS24/B3GALT1/EEF1B2/RARS/RPS21/RPS4X/RPL10	64
Mo_only	GO:0006518	peptide metabolic process	62/502	363/8043	1.27093e-13	9.24284e-11	9.09384e-11	RPS12/RPLP1/RPS29/RPS6/RPL35/RPS13/MRPL55/RACK1/RPS28/ELAVL1/RPL36/EEF2/RPS15/RPS23/RPL31/RPS27A/RPS7/RPL8/RPS20/RPS27/RPL5/RPL3/RPS26/RPL13/RPL13A/RPS5/RPL22/RPL11/LIN28A/RPS8/RPL10A/GSTA4/RPS17/RPL9/RPS3A/RPL34/RPS3/NARS2/FAM129A/LOC100738684/RPL21/UNK/RPL38/RPL27/RPL23/RPL23A/EIF5A/EIF4A1/RPL26/RPL15/RPSA/RPL32/EIF4A2/RPL35A/RPL6/RPLP0/RPS24/EEF1B2/RARS/RPS21/RPS4X/RPL10	62
Mo_only	GO:0043603	cellular amide metabolic process	69/502	485/8043	3.74789e-11	2.18052e-08	2.14537e-08	RPS12/RPLP1/RPS29/RPS6/RPL35/RPS13/MRPL55/RACK1/RPS28/ELAVL1/RPL36/EEF2/RPS15/RPS23/ACSL6/RPL31/RPS27A/RPS7/RPL8/RPS20/RPS27/RPL5/RPL3/RPS26/RPL13/NUDT7/RPL13A/RPS5/RPL22/RPL11/LIN28A/RPS8/RPL10A/GSTA4/RPS17/RPL9/RPS3A/RPL34/RPS3/NARS2/FAM129A/LOC100738684/RPL21/ENPP7/UNK/RPL38/RPL27/RPL23/RPL23A/EIF5A/EIF4A1/RPL26/RPL15/RPSA/RPL32/EIF4A2/RPL35A/P2RX7/RPL6/RPLP0/RPS24/B3GALT1/EEF1B2/RARS/RPS21/AA…	69
Mo_only	GO:0002181	cytoplasmic translation	19/502	50/8043	4.57704e-11	2.2191e-08	2.18333e-08	RPLP1/RPS29/RPS28/RPS23/RPL31/RPL8/RPS26/RPL22/LIN28A/RPL9/LOC100738684/UNK/EIF4A1/RPL26/RPSA/EIF4A2/RPL6/RPLP0/RPS21	19
Mo_only	GO:0042254	ribosome biogenesis	23/502	124/8043	1.94807e-06	0.000809561	0.00079651	RPS6/RPL35/REXO4/SART1/RPS28/RPS15/BUD23/RPS7/RPL7/RPS27/SNU13/MRTO4/RPS8/NOL11/RPL27/RPL23A/RPL26/RPSA/RPL6/RPLP0/NOP56/RPS21/RPL10	23
Mo_only	GO:0042255	ribosome assembly	9/502	26/8043	1.60431e-05	0.00583369	0.00573964	RPS28/RPS15/RPS27/MRTO4/RPL23A/RPSA/RPL6/RPLP0/RPL10	9
Mo_only	GO:0022613	ribonucleoprotein complex biogenesis	26/502	181/8043	5.20838e-05	0.0168347	0.0165633	RPS6/RPL35/REXO4/SART1/RPS28/RPS15/BUD23/RPS7/RPL7/RPS27/SNU13/MRTO4/RPS8/LOC100738684/RPL38/NOL11/RPL27/RPL23A/RPL26/RPSA/RPL6/RPLP0/NOP56/SRSF6/RPS21/RPL10	26
Mo_only	GO:0042274	ribosomal small subunit biogenesis	9/502	32/8043	0.000102792	0.0299021	0.0294201	RPS6/RPS28/RPS15/RPS7/RPS27/RPS8/NOL11/RPSA/RPS21	9
Mo_only	GO:0042273	ribosomal large subunit biogenesis	8/502	27/8043	0.000167836	0.0443849	0.0436694	RPL35/RPL7/MRTO4/RPL23A/RPL26/RPL6/RPLP0/RPL10	8
MII_Mo	GO:0045165	cell fate commitment	27/229	124/8043	5.15659e-17	6.00704e-14	4.56403e-14	DLL1/OLIG3/DLL4/MYOD1/PITX1/SIX2/GDF7/SOX17/LY9/IL6R/WNT4/GATA6/DMRTA2/TAL1/PTF1A/GATA3/SOX9/GATA2/OLIG2/GATA4/TBX3/GLI2/DLX1/SFRP1/NKX2-2/SMO/AR	27
MII_Mo	GO:0048598	embryonic morphogenesis	32/229	183/8043	5.17402e-17	6.00704e-14	4.56403e-14	DLL1/DLL4/FOXE1/LHX2/IGF2/PITX1/POU4F3/OTX1/SIX2/GDF7/SOX11/OSR2/SOX17/CYR61/SALL1/TAL1/MDFI/NKX3-2/PKD2/GATA3/PDX1/SOX9/TBX3/VENTX/GLI2/GBX2/SFRP1/SMO/HOXA10/HOXA3/AR/APLN	32
MII_Mo	GO:0009790	embryo development	38/229	314/8043	1.52576e-14	1.18094e-11	8.97256e-12	DLL1/DLL4/FOXE1/LHX2/IGF2/FOSL1/KEAP1/PITX1/POU4F3/OTX1/SIX2/GDF7/SOX11/OSR2/SOX17/CYR61/SALL1/TAL1/MDFI/NKX3-2/PKD2/VASH2/GATA3/PDX1/SOX9/TBX3/VENTX/GLI2/ACVR1C/DLX1/GBX2/SFRP1/SMO/EVX1/HOXA10/HOXA3/AR/APLN	38
MII_Mo	GO:0009887	animal organ morphogenesis	36/229	319/8043	7.01653e-13	3.20846e-10	2.43773e-10	DLL1/DLL4/FOXE1/POU4F3/OTX1/SIX2/GDF7/SOX11/OSR2/SOX17/CYR61/SALL1/GATA6/MDFI/NKX3-2/PROM1/PKD2/FGF5/LHX9/PTF1A/GATA3/FGF9/SOX9/CHAD/NTN1/GATA4/TBX3/ACTA1/GLI2/DLX1/GBX2/NKX2-5/SFRP1/SMO/HOXA3/AR	36
MII_Mo	GO:0030182	neuron differentiation	39/229	372/8043	7.39023e-13	3.20846e-10	2.43773e-10	DLL1/OLIG3/DLL4/NTRK3/LHX2/PRDM12/SEMA6A/POU4F3/DPYSL5/GDF7/SOX11/CDH11/WNT4/DMRTA2/TAL1/PHACTR1/RASGRF1/ISLR2/PROM1/POU4F2/VASH2/LHX9/PTF1A/SOX9/NTN1/OLIG2/NEFL/CDHR1/DPYSL4/GLI2/NR4A2/DLX1/GBX2/NKX2-5/SFRP1/NKX2-2/FOXA2/SMO/EVX1	39
MII_Mo	GO:0035295	tube development	37/229	338/8043	8.2906e-13	3.20846e-10	2.43773e-10	DLL1/DLL4/FOXE1/LHX2/ANGPTL4/SIX2/GDF7/SOX11/SOX17/CYR61/LGR5/SALL1/GATA6/TAL1/KIAA1024/NKX3-2/PKD2/PIK3CG/VASH2/HSD11B1/GATA3/FGF9/PDX1/RGCC/SOX9/HOXB13/GATA2/GATA4/TBX3/GLI2/GBX2/SFRP1/NKX2-2/SMO/HOXA3/AR/APLN	37
MII_Mo	GO:0048699	generation of neurons	41/229	417/8043	1.48118e-12	4.91328e-10	3.73301e-10	DLL1/OLIG3/DLL4/NTRK3/LHX2/PRDM12/SEMA6A/POU4F3/DPYSL5/GDF7/SOX11/CDH11/HES2/WNT4/DMRTA2/TAL1/PHACTR1/MDGA1/RASGRF1/ISLR2/PROM1/POU4F2/VASH2/LHX9/PTF1A/SOX9/NTN1/OLIG2/NEFL/CDHR1/DPYSL4/GLI2/NR4A2/DLX1/GBX2/NKX2-5/SFRP1/NKX2-2/FOXA2/SMO/EVX1	41
MII_Mo	GO:0007417	central nervous system development	30/229	235/8043	2.98604e-12	8.66699e-10	6.58501e-10	DLL1/OLIG3/POU3F2/DLL4/SIX6/LHX2/PITX1/OTX1/GDF7/SOX11/CDH11/SALL1/DMRTA2/TAL1/PHACTR1/MDGA1/TFAP2D/PKD2/PTF1A/SOX9/IGF2BP1/OLIG2/TBX3/GLI2/NR4A2/DLX1/GBX2/SFRP1/NKX2-2/SMO	30
MII_Mo	GO:0022008	neurogenesis	42/229	460/8043	8.9281e-12	2.30345e-09	1.75012e-09	DLL1/OLIG3/DLL4/NTRK3/LHX2/PRDM12/SEMA6A/POU4F3/DPYSL5/GDF7/SOX11/CDH11/HES2/WNT4/DMRTA2/TAL1/PHACTR1/MDGA1/RASGRF1/ISLR2/PROM1/POU4F2/FGF5/VASH2/LHX9/PTF1A/SOX9/NTN1/OLIG2/NEFL/CDHR1/DPYSL4/GLI2/NR4A2/DLX1/GBX2/NKX2-5/SFRP1/NKX2-2/FOXA2/SMO/EVX1	42
MII_Mo	GO:0009792	embryo development ending in birth or egg hatching	27/229	209/8043	3.02248e-11	7.01819e-09	5.33229e-09	DLL1/LHX2/IGF2/FOSL1/KEAP1/SIX2/GDF7/SOX11/OSR2/SOX17/CYR61/MDFI/NKX3-2/PKD2/VASH2/GATA3/SOX9/TBX3/GLI2/ACVR1C/DLX1/GBX2/SFRP1/SMO/EVX1/HOXA3/AR	27
MII_Mo	GO:0048568	embryonic organ development	22/229	139/8043	4.12618e-11	8.70999e-09	6.61768e-09	DLL1/FOXE1/IGF2/POU4F3/OTX1/SIX2/SOX11/OSR2/SOX17/CYR61/SALL1/TAL1/MDFI/NKX3-2/PKD2/VASH2/SOX9/TBX3/GLI2/GBX2/SMO/HOXA3	22
MII_Mo	GO:0021510	spinal cord development	11/229	28/8043	1.10061e-10	2.12967e-08	1.61808e-08	DLL1/OLIG3/DLL4/GDF7/SOX11/TAL1/PKD2/OLIG2/GLI2/NKX2-2/SMO	11
MII_Mo	GO:0043009	chordate embryonic development	26/229	206/8043	1.22267e-10	2.18388e-08	1.65927e-08	DLL1/LHX2/IGF2/FOSL1/KEAP1/SIX2/GDF7/SOX11/OSR2/SOX17/CYR61/MDFI/NKX3-2/PKD2/VASH2/GATA3/SOX9/TBX3/GLI2/ACVR1C/DLX1/GBX2/SFRP1/SMO/HOXA3/AR	26
MII_Mo	GO:0007389	pattern specification process	21/229	136/8043	1.88868e-10	3.05249e-08	2.31922e-08	DLL1/DLL4/LHX2/OTX1/SIX2/SOX17/HES4/HES2/DMRTA2/NKX3-2/PKD2/TBX3/GLI2/DLX1/GBX2/SFRP1/NKX2-2/SMO/HOXA10/HOXA3/AR	21
MII_Mo	GO:0060322	head development	24/229	180/8043	2.09958e-10	3.05249e-08	2.31922e-08	DLL1/POU3F2/SIX6/LHX2/PITX1/OTX1/GDF7/OSR2/SALL1/DMRTA2/PHACTR1/MDGA1/TFAP2D/PTF1A/SOX9/IGF2BP1/OLIG2/TBX3/GLI2/NR4A2/DLX1/GBX2/SFRP1/SMO	24
MII_Mo	GO:0001708	cell fate specification	12/229	37/8043	2.10335e-10	3.05249e-08	2.31922e-08	DLL1/OLIG3/SIX2/SOX17/DMRTA2/SOX9/OLIG2/TBX3/GLI2/NKX2-2/SMO/AR	12
MII_Mo	GO:0048565	digestive tract development	13/229	48/8043	4.59184e-10	6.27191e-08	4.76528e-08	FOXE1/SIX2/SOX11/SOX17/SALL1/GATA6/NKX3-2/PDX1/GATA4/GLI2/SFRP1/NKX2-2/SMO	13
MII_Mo	GO:0003002	regionalization	19/229	117/8043	5.95579e-10	7.44754e-08	5.65849e-08	DLL1/DLL4/LHX2/OTX1/SIX2/SOX17/HES4/HES2/DMRTA2/TBX3/GLI2/DLX1/GBX2/SFRP1/NKX2-2/SMO/HOXA10/HOXA3/AR	19
MII_Mo	GO:0055123	digestive system development	13/229	49/8043	6.09402e-10	7.44754e-08	5.65849e-08	FOXE1/SIX2/SOX11/SOX17/SALL1/GATA6/NKX3-2/PDX1/GATA4/GLI2/SFRP1/NKX2-2/SMO	13
MII_Mo	GO:0072359	circulatory system development	32/229	328/8043	6.9668e-10	8.08846e-08	6.14545e-08	DLL1/DLL4/NTRK3/FOSL1/ANGPTL4/ANTXR1/SOX11/SOX17/CYR61/SALL1/GATA6/TAL1/KIAA1024/POU4F2/PKD2/PIK3CG/VASH2/NEBL/GATA3/RGCC/SOX9/HOXB13/GATA2/ADRA1A/GATA4/TBX3/GLI2/GBX2/NKX2-5/SMO/HOXA3/APLN	32
MII_Mo	GO:0048562	embryonic organ morphogenesis	17/229	94/8043	8.82273e-10	9.75542e-08	7.41198e-08	DLL1/FOXE1/POU4F3/OTX1/SIX2/SOX11/OSR2/SOX17/MDFI/NKX3-2/PKD2/SOX9/TBX3/GLI2/GBX2/SMO/HOXA3	17
MII_Mo	GO:0035239	tube morphogenesis	29/229	281/8043	1.28541e-09	1.3567e-07	1.03079e-07	DLL1/DLL4/LHX2/ANGPTL4/SIX2/GDF7/SOX11/SOX17/CYR61/LGR5/GATA6/TAL1/KIAA1024/PKD2/PIK3CG/VASH2/GATA3/RGCC/SOX9/HOXB13/GATA2/TBX3/GLI2/GBX2/SFRP1/SMO/HOXA3/AR/APLN	29
MII_Mo	GO:0007420	brain development	22/229	166/8043	1.39926e-09	1.41265e-07	1.0733e-07	DLL1/POU3F2/SIX6/LHX2/PITX1/OTX1/GDF7/SALL1/DMRTA2/PHACTR1/MDGA1/TFAP2D/PTF1A/IGF2BP1/OLIG2/TBX3/GLI2/NR4A2/DLX1/GBX2/SFRP1/SMO	22
MII_Mo	GO:0048729	tissue morphogenesis	24/229	199/8043	1.69807e-09	1.64288e-07	1.24823e-07	DLL1/DLL4/FOXE1/LHX2/SIX2/GDF7/SOX11/SOX17/CYR61/LGR5/SALL1/TAL1/PKD2/GATA3/PDX1/SOX9/TBX3/ACTA1/GLI2/GBX2/NKX2-5/SFRP1/SMO/AR	24
MII_Mo	GO:2000026	regulation of multicellular organismal development	36/229	429/8043	3.46977e-09	3.22272e-07	2.44856e-07	DLL1/DLL4/LHX2/NR5A1/MYOD1/KEAP1/SEMA6A/SIX2/SOX11/OSR2/SOX17/SNAI2/CYR61/HES2/GATA6/DMRTA2/TAL1/KIAA1024/ISLR2/NKX3-2/POU4F2/VASH2/GATA3/RGCC/SOX9/NTN1/GATA2/OLIG2/TBX3/GLI2/DLX1/GPR55/GBX2/SFRP1/NKX2-2/SMO	36
MII_Mo	GO:0035270	endocrine system development	13/229	56/8043	3.67479e-09	3.28187e-07	2.4935e-07	DLL1/FOXE1/NR5A1/PITX1/SALL1/PDX1/SOX9/GLI2/NKX2-5/NKX2-2/FOXA2/SMO/HOXA3	13
MII_Mo	GO:0021953	central nervous system neuron differentiation	13/229	57/8043	4.64174e-09	3.9919e-07	3.03297e-07	OLIG3/DLL4/GDF7/CDH11/TAL1/OLIG2/GLI2/NR4A2/DLX1/GBX2/SFRP1/NKX2-2/SMO	13
MII_Mo	GO:0002009	morphogenesis of an epithelium	21/229	164/8043	6.34972e-09	5.26573e-07	4.0008e-07	DLL1/DLL4/FOXE1/LHX2/SIX2/GDF7/SOX11/SOX17/CYR61/LGR5/SALL1/PKD2/GATA3/PDX1/SOX9/TBX3/GLI2/GBX2/SFRP1/SMO/AR	21
MII_Mo	GO:0007507	heart development	20/229	157/8043	1.62309e-08	1.26788e-06	9.63307e-07	DLL1/DLL4/NTRK3/SOX11/SOX17/CYR61/SALL1/GATA6/POU4F2/PKD2/NEBL/GATA3/SOX9/ADRA1A/GATA4/TBX3/GLI2/NKX2-5/SMO/APLN	20
MII_Mo	GO:0060562	epithelial tube morphogenesis	17/229	113/8043	1.63808e-08	1.26788e-06	9.63307e-07	DLL1/DLL4/LHX2/SIX2/GDF7/SOX11/SOX17/LGR5/PKD2/GATA3/SOX9/TBX3/GLI2/GBX2/SFRP1/SMO/AR	17
MII_Mo	GO:0030900	forebrain development	16/229	100/8043	1.77746e-08	1.33137e-06	1.01155e-06	LHX2/PITX1/OTX1/GDF7/SALL1/DMRTA2/PHACTR1/MDGA1/IGF2BP1/OLIG2/TBX3/GLI2/NR4A2/DLX1/GBX2/SMO	16
MII_Mo	GO:0048646	anatomical structure formation involved in morphogenesis	32/229	375/8043	1.92372e-08	1.3959e-06	1.06058e-06	DLL1/DLL4/LHX2/ANGPTL4/SIX2/GDF7/SOX11/SOX17/CYR61/GATA6/TAL1/KIAA1024/NKX3-2/PIK3CG/VASH2/PTF1A/NEBL/GATA3/RGCC/SOX9/HOXB13/CHAD/GATA2/TBX3/ACTA1/GLI2/GBX2/SFRP1/SMO/HOXA3/AR/APLN	32
MII_Mo	GO:0048663	neuron fate commitment	9/229	26/8043	2.15447e-08	1.51596e-06	1.1518e-06	DLL1/OLIG3/DLL4/DMRTA2/PTF1A/OLIG2/GLI2/DLX1/NKX2-2	9
MII_Mo	GO:0051093	negative regulation of developmental process	26/229	264/8043	2.62391e-08	1.79198e-06	1.36151e-06	DLL1/LHX2/NR5A1/IGF2/SEMA6A/SIX2/SOX11/SOX17/SNAI2/KIAA1024/NKX3-2/POU4F2/GATA3/RGCC/SOX9/CHAD/OLIG2/TBX3/GLI2/DLX1/GPR55/NKX2-5/SFRP1/NKX2-2/FOXA2/SMO	26
MII_Mo	GO:0007423	sensory organ development	19/229	150/8043	4.13787e-08	2.74518e-06	2.08574e-06	DLL1/DLL4/SIX6/LHX2/POU4F3/OTX1/SIX2/SOX11/OSR2/LGR5/NKX3-2/PROM1/POU4F2/PTF1A/GATA3/SOX9/GLI2/DLX1/GBX2	19
MII_Mo	GO:0048608	reproductive structure development	20/229	168/8043	5.18926e-08	3.25661e-06	2.47431e-06	NR5A1/IGF2/FOSL1/GDF7/CYR61/SALL1/GATA6/MDFI/PKD2/VASH2/LHX9/GATA3/SOX9/GATA4/TBX3/GLI2/SFRP1/TFAP2C/HOXA10/AR	20
MII_Mo	GO:0061458	reproductive system development	20/229	168/8043	5.18926e-08	3.25661e-06	2.47431e-06	NR5A1/IGF2/FOSL1/GDF7/CYR61/SALL1/GATA6/MDFI/PKD2/VASH2/LHX9/GATA3/SOX9/GATA4/TBX3/GLI2/SFRP1/TFAP2C/HOXA10/AR	20
MII_Mo	GO:0009952	anterior/posterior pattern specification	13/229	71/8043	7.73476e-08	4.66111e-06	3.54142e-06	DLL1/OTX1/SIX2/SOX17/HES4/HES2/TBX3/GLI2/GBX2/SFRP1/SMO/HOXA10/HOXA3	13
MII_Mo	GO:0060429	epithelium development	28/229	317/8043	7.82875e-08	4.66111e-06	3.54142e-06	DLL1/DLL4/FOXE1/LHX2/KEAP1/POU4F3/SLC9A4/SIX2/GDF7/SOX11/SOX17/CYR61/LGR5/SALL1/GATA6/NKX3-2/PKD2/GATA3/PDX1/SOX9/GATA4/TBX3/GLI2/GBX2/SFRP1/NKX2-2/SMO/AR	28
MII_Mo	GO:0097485	neuron projection guidance	12/229	61/8043	1.07998e-07	6.26929e-06	4.76329e-06	LHX2/SEMA6A/POU4F3/DPYSL5/GDF7/POU4F2/NTN1/DPYSL4/GLI2/GBX2/SMO/EVX1	12
MII_Mo	GO:0045596	negative regulation of cell differentiation	21/229	199/8043	1.94329e-07	1.10057e-05	8.3619e-06	DLL1/LHX2/IGF2/SEMA6A/SIX2/SOX11/SNAI2/NKX3-2/POU4F2/GATA3/SOX9/OLIG2/TBX3/GLI2/DLX1/GPR55/NKX2-5/SFRP1/NKX2-2/FOXA2/SMO	21
MII_Mo	GO:0021515	cell differentiation in spinal cord	7/229	17/8043	2.11151e-07	1.16736e-05	8.86939e-06	OLIG3/DLL4/GDF7/TAL1/OLIG2/GLI2/NKX2-2	7
MII_Mo	GO:0007267	cell-cell signaling	35/229	484/8043	2.52364e-07	1.36277e-05	1.0354e-05	DLL1/RSPO3/GALR1/PTGES/SYT12/CHRM1/SOX11/SOX17/SNAI2/KCNA2/WNT10B/LGR5/CDH11/SLC6A2/SALL1/WNT4/RASGRF1/CHGA/PKD2/LGR6/GATA3/PDX1/SOX9/ADRA1A/FZD10/TBX3/ADRA2A/GLI2/INHBB/ACVR1C/IHH/SFRP1/SHH/SMO/KCNE5	35
MII_Mo	GO:0000122	negative regulation of transcription by RNA polymerase II	22/229	226/8043	4.06671e-07	2.14611e-05	1.63058e-05	OLIG3/DLL4/PRDM12/IGF2/KLF11/SOX11/OSR2/GATA6/TAL1/PDX1/CBX4/SOX9/OLIG2/VENTX/GLI2/NR4A2/DLX1/NKX2-5/ID1/SMO/AR/SOX3	22
MII_Mo	GO:0045595	regulation of cell differentiation	34/229	474/8043	4.63847e-07	2.39345e-05	1.8185e-05	DLL1/DLL4/LHX2/IGF2/MYOD1/KEAP1/SEMA6A/SIX2/GDF7/SOX11/SOX17/SNAI2/CYR61/HES2/DMRTA2/TAL1/ISLR2/NKX3-2/POU4F2/GATA3/RGCC/SOX9/NTN1/OLIG2/TBX3/GLI2/DLX1/GPR55/NKX2-5/SFRP1/NKX2-2/FOXA2/SMO/AR	34
MII_Mo	GO:0045944	positive regulation of transcription by RNA polymerase II	28/229	347/8043	5.16745e-07	2.60844e-05	1.98184e-05	DLL1/GALR1/NR5A1/IGF2/FOSL1/MYOD1/SOX11/SOX17/CYR61/SALL1/GATA6/TAL1/TFAP2D/PPARGC1A/PKD2/GATA3/PDX1/RGCC/SOX9/GATA2/TBX3/DLX1/FOXA2/SMO/EVX1/AR/APLN/SOX3	28
MII_Mo	GO:0000904	cell morphogenesis involved in differentiation	20/229	196/8043	6.63467e-07	3.20991e-05	2.43882e-05	LHX2/SEMA6A/POU4F3/ANTXR1/DPYSL5/GDF7/SOX17/CDH11/TAL1/PHACTR1/ISLR2/POU4F2/NTN1/CDHR1/GLI2/NR4A2/GBX2/SMO/EVX1/AR	20
MII_Mo	GO:0050767	regulation of neurogenesis	14/229	99/8043	6.86287e-07	3.20991e-05	2.43882e-05	DLL1/DLL4/LHX2/SEMA6A/SOX11/HES2/DMRTA2/ISLR2/POU4F2/NTN1/OLIG2/DLX1/NKX2-2/SMO	14
MII_Mo	GO:0051241	negative regulation of multicellular organismal process	25/229	291/8043	6.94573e-07	3.20991e-05	2.43882e-05	DLL1/DLL4/LHX2/NR5A1/SEMA6A/SOX11/SOX17/SNAI2/GATA6/KIAA1024/NKX3-2/POU4F2/RGCC/SOX9/ADRA1A/KCNMA1/GLI2/INHBB/ACVR1C/DLX1/GPR55/SFRP1/FOXA2/THBD/SMO	25
MII_Mo	GO:0001656	metanephros development	8/229	28/8043	7.26264e-07	3.20991e-05	2.43882e-05	SIX2/OSR2/SOX17/SALL1/PKD2/GATA3/SOX9/SMO	8
MII_Mo	GO:0045893	positive regulation of transcription, DNA-templated	33/229	461/8043	7.32666e-07	3.20991e-05	2.43882e-05	DLL1/GALR1/FOXE1/NR5A1/IGF2/FOSL1/MYOD1/GDF7/SOX11/SOX17/CYR61/SALL1/GATA6/TAL1/TFAP2D/PPARGC1A/PKD2/GATA3/PDX1/RGCC/SOX9/GATA2/SOX7/GATA4/TBX3/DLX1/SFRP1/FOXA2/SMO/EVX1/AR/APLN/SOX3	33
MII_Mo	GO:1902680	positive regulation of RNA biosynthetic process	33/229	461/8043	7.32666e-07	3.20991e-05	2.43882e-05	DLL1/GALR1/FOXE1/NR5A1/IGF2/FOSL1/MYOD1/GDF7/SOX11/SOX17/CYR61/SALL1/GATA6/TAL1/TFAP2D/PPARGC1A/PKD2/GATA3/PDX1/RGCC/SOX9/GATA2/SOX7/GATA4/TBX3/DLX1/SFRP1/FOXA2/SMO/EVX1/AR/APLN/SOX3	33
MII_Mo	GO:1903508	positive regulation of nucleic acid-templated transcription	33/229	461/8043	7.32666e-07	3.20991e-05	2.43882e-05	DLL1/GALR1/FOXE1/NR5A1/IGF2/FOSL1/MYOD1/GDF7/SOX11/SOX17/CYR61/SALL1/GATA6/TAL1/TFAP2D/PPARGC1A/PKD2/GATA3/PDX1/RGCC/SOX9/GATA2/SOX7/GATA4/TBX3/DLX1/SFRP1/FOXA2/SMO/EVX1/AR/APLN/SOX3	33
MII_Mo	GO:0007411	axon guidance	11/229	60/8043	7.85902e-07	3.37938e-05	2.56759e-05	LHX2/SEMA6A/POU4F3/DPYSL5/GDF7/POU4F2/NTN1/GLI2/GBX2/SMO/EVX1	11
MII_Mo	GO:0061564	axon development	16/229	132/8043	9.25001e-07	3.90519e-05	2.96708e-05	LHX2/SEMA6A/POU4F3/DPYSL5/GDF7/CDH11/ISLR2/POU4F2/VASH2/NTN1/NEFL/GLI2/NR4A2/GBX2/SMO/EVX1	16
MII_Mo	GO:0031175	neuron projection development	22/229	241/8043	1.22419e-06	5.07603e-05	3.85667e-05	NTRK3/LHX2/PRDM12/SEMA6A/POU4F3/DPYSL5/GDF7/CDH11/PHACTR1/RASGRF1/ISLR2/POU4F2/VASH2/NTN1/NEFL/DPYSL4/GLI2/NR4A2/GBX2/SFRP1/SMO/EVX1	22
MII_Mo	GO:0021536	diencephalon development	8/229	30/8043	1.30187e-06	5.14001e-05	3.90528e-05	PITX1/OTX1/SALL1/OLIG2/GLI2/NR4A2/GBX2/SMO	8
MII_Mo	GO:0031016	pancreas development	8/229	30/8043	1.30187e-06	5.14001e-05	3.90528e-05	DLL1/NKX3-2/PTF1A/PDX1/SOX9/NKX2-2/FOXA2/SMO	8
MII_Mo	GO:0001568	blood vessel development	21/229	223/8043	1.30603e-06	5.14001e-05	3.90528e-05	DLL1/DLL4/FOSL1/ANGPTL4/ANTXR1/SOX17/CYR61/GATA6/TAL1/KIAA1024/PKD2/PIK3CG/VASH2/RGCC/HOXB13/GATA2/TBX3/GBX2/SMO/HOXA3/APLN	21
MII_Mo	GO:0048732	gland development	16/229	137/8043	1.53151e-06	5.86441e-05	4.45566e-05	FOXE1/NR5A1/PITX1/GDF7/SALL1/GATA6/PKD2/PDX1/SOX9/TBX3/GLI2/NKX2-5/SFRP1/SMO/HOXA3/AR	16
MII_Mo	GO:0003007	heart morphogenesis	13/229	91/8043	1.54061e-06	5.86441e-05	4.45566e-05	DLL1/DLL4/SOX11/SOX17/CYR61/GATA6/PKD2/GATA3/SOX9/GATA4/TBX3/NKX2-5/SMO	13
MII_Mo	GO:0060485	mesenchyme development	14/229	107/8043	1.79441e-06	6.72037e-05	5.106e-05	SEMA6A/SIX2/SOX11/SNAI2/PKD2/RGCC/SOX9/GATA4/TBX3/ACTA1/GBX2/SFRP1/FOXA2/SMO	14
MII_Mo	GO:0051960	regulation of nervous system development	15/229	123/8043	1.89224e-06	6.97425e-05	5.2989e-05	DLL1/DLL4/LHX2/SEMA6A/SOX11/HES2/DMRTA2/ISLR2/POU4F2/NTN1/OLIG2/DLX1/GBX2/NKX2-2/SMO	15
MII_Mo	GO:0001501	skeletal system development	17/229	157/8043	2.08083e-06	7.5495e-05	5.73596e-05	PITX1/SIX2/SOX11/OSR2/SNAI2/CYR61/TAL1/MDFI/NKX3-2/SOX9/CHAD/TBX3/GLI2/DLX1/SFRP1/HOXA10/HOXA3	17
MII_Mo	GO:0046661	male sex differentiation	11/229	66/8043	2.11896e-06	7.56959e-05	5.75123e-05	NR5A1/GATA6/LHX9/GATA3/SOX9/GATA4/TBX3/SFRP1/TFAP2C/HOXA10/AR	11
MII_Mo	GO:0030855	epithelial cell differentiation	19/229	194/8043	2.37912e-06	8.37016e-05	6.35949e-05	DLL1/KEAP1/POU4F3/SLC9A4/SIX2/GDF7/SOX11/SOX17/SALL1/GATA6/NKX3-2/GATA3/PDX1/SOX9/GATA4/TBX3/NKX2-2/SMO/AR	19
MII_Mo	GO:0045664	regulation of neuron differentiation	11/229	67/8043	2.4724e-06	8.56854e-05	6.51021e-05	DLL1/GDF7/SOX11/POU4F2/SOX9/OLIG2/GLI2/DLX1/NKX2-5/SFRP1/NKX2-2	11
MII_Mo	GO:0051254	positive regulation of RNA metabolic process	33/229	488/8043	2.60575e-06	8.89787e-05	6.76043e-05	DLL1/GALR1/FOXE1/NR5A1/IGF2/FOSL1/MYOD1/GDF7/SOX11/SOX17/CYR61/SALL1/GATA6/TAL1/TFAP2D/PPARGC1A/PKD2/GATA3/PDX1/RGCC/SOX9/GATA2/SOX7/GATA4/TBX3/DLX1/SFRP1/FOXA2/SMO/EVX1/AR/APLN/SOX3	33
MII_Mo	GO:0001944	vasculature development	21/229	233/8043	2.65892e-06	8.94785e-05	6.7984e-05	DLL1/DLL4/FOSL1/ANGPTL4/ANTXR1/SOX17/CYR61/GATA6/TAL1/KIAA1024/PKD2/PIK3CG/VASH2/RGCC/HOXB13/GATA2/TBX3/GBX2/SMO/HOXA3/APLN	21
MII_Mo	GO:0060537	muscle tissue development	15/229	128/8043	3.14279e-06	0.000104251	7.92079e-05	DLL1/DLL4/MYOD1/PITX1/SOX11/DMRTA2/PPARGC1A/PKD2/NEBL/SOX9/ADRA1A/TBX3/ACTA1/NKX2-5/SMO	15
MII_Mo	GO:0098773	skin epidermis development	8/229	34/8043	3.65969e-06	0.000119687	9.09361e-05	DLL1/FOXE1/LHX2/LGR5/GATA6/SOX9/GLI2/SMO	8
MII_Mo	GO:0043583	ear development	11/229	70/8043	3.86149e-06	0.000124533	9.46179e-05	DLL1/POU4F3/OTX1/SIX2/OSR2/LGR5/NKX3-2/GATA3/SOX9/GLI2/GBX2	11
MII_Mo	GO:0048665	neuron fate specification	5/229	10/8043	4.01767e-06	0.000127795	9.70961e-05	DLL1/OLIG3/DMRTA2/GLI2/NKX2-2	5
MII_Mo	GO:0048667	cell morphogenesis involved in neuron differentiation	16/229	148/8043	4.27879e-06	0.000134261	0.000102009	LHX2/SEMA6A/POU4F3/DPYSL5/GDF7/CDH11/PHACTR1/ISLR2/POU4F2/NTN1/CDHR1/GLI2/NR4A2/GBX2/SMO/EVX1	16
MII_Mo	GO:0048666	neuron development	23/229	281/8043	4.5502e-06	0.000140874	0.000107033	NTRK3/LHX2/PRDM12/SEMA6A/POU4F3/DPYSL5/GDF7/CDH11/PHACTR1/RASGRF1/ISLR2/POU4F2/VASH2/NTN1/NEFL/CDHR1/DPYSL4/GLI2/NR4A2/GBX2/SFRP1/SMO/EVX1	23
MII_Mo	GO:0021915	neural tube development	9/229	46/8043	4.62158e-06	0.000141201	0.000107282	LHX2/GDF7/SOX11/SOX17/PKD2/GLI2/GBX2/SFRP1/SMO	9
MII_Mo	GO:0007409	axonogenesis	14/229	116/8043	4.75792e-06	0.000143479	0.000109013	LHX2/SEMA6A/POU4F3/DPYSL5/GDF7/CDH11/ISLR2/POU4F2/NTN1/GLI2/NR4A2/GBX2/SMO/EVX1	14
MII_Mo	GO:0003006	developmental process involved in reproduction	27/229	368/8043	5.21979e-06	0.000154304	0.000117237	NR5A1/IGF2/FOSL1/CATSPERZ/GDF7/SOX17/CYR61/LGR5/SALL1/GATA6/DMRTA2/MDFI/PKD2/VASH2/LHX9/GATA3/SOX9/DAZL/GATA4/TBX3/GLI2/SFRP1/TFAP2C/GALNTL5/HOXA10/AR/SOX3	27
MII_Mo	GO:0008584	male gonad development	10/229	59/8043	5.31625e-06	0.000154304	0.000117237	NR5A1/GATA6/LHX9/GATA3/SOX9/GATA4/SFRP1/TFAP2C/HOXA10/AR	10
MII_Mo	GO:0046546	development of primary male sexual characteristics	10/229	59/8043	5.31625e-06	0.000154304	0.000117237	NR5A1/GATA6/LHX9/GATA3/SOX9/GATA4/SFRP1/TFAP2C/HOXA10/AR	10
MII_Mo	GO:0008284	positive regulation of cell population proliferation	26/229	348/8043	5.69581e-06	0.000161827	0.000122953	DLL1/DLL4/NR4A3/LHX2/IGF2/FGF19/SIX2/SOX11/OSR2/IL6R/CYR61/GATA6/PTGFR/DMRTA2/FGF5/VASH2/FGF9/PDX1/SOX9/TBX3/GLI2/SFRP1/SMO/HOXA3/AR/APLN	26
MII_Mo	GO:0090596	sensory organ morphogenesis	12/229	87/8043	5.71483e-06	0.000161827	0.000122953	DLL1/POU4F3/OTX1/SIX2/SOX11/OSR2/NKX3-2/PROM1/PTF1A/SOX9/GLI2/GBX2	12
MII_Mo	GO:2000179	positive regulation of neural precursor cell proliferation	5/229	11/8043	7.19517e-06	0.000199813	0.000151814	DLL4/LHX2/DMRTA2/GLI2/SMO	5
MII_Mo	GO:0003279	cardiac septum development	8/229	37/8043	7.22839e-06	0.000199813	0.000151814	SOX11/CYR61/GATA6/GATA3/GATA4/TBX3/NKX2-5/SMO	8
MII_Mo	GO:0014033	neural crest cell differentiation	7/229	27/8043	7.55681e-06	0.000206434	0.000156845	SEMA6A/SOX11/SNAI2/SOX9/GBX2/SFRP1/SMO	7
MII_Mo	GO:0001655	urogenital system development	13/229	107/8043	9.72341e-06	0.000262532	0.000199467	DLL1/SIX2/OSR2/SOX17/LGR5/SALL1/PKD2/GATA3/SOX9/GLI2/SFRP1/SMO/AR	13
MII_Mo	GO:0072001	renal system development	12/229	92/8043	1.03096e-05	0.00027516	0.000209061	DLL1/SIX2/OSR2/SOX17/LGR5/SALL1/PKD2/GATA3/SOX9/GLI2/SFRP1/SMO	12
MII_Mo	GO:0060041	retina development in camera-type eye	8/229	39/8043	1.09661e-05	0.000289354	0.000219846	DLL1/DLL4/LHX2/PROM1/POU4F2/PTF1A/SOX9/DLX1	8
MII_Mo	GO:0007548	sex differentiation	13/229	110/8043	1.31967e-05	0.000341277	0.000259296	NR5A1/SALL1/GATA6/DMRTA2/LHX9/GATA3/SOX9/GATA4/TBX3/SFRP1/TFAP2C/HOXA10/AR	13
MII_Mo	GO:0016331	morphogenesis of embryonic epithelium	9/229	52/8043	1.33004e-05	0.000341277	0.000259296	LHX2/GDF7/SOX11/GATA3/PDX1/SOX9/GLI2/SFRP1/AR	9
MII_Mo	GO:0002065	columnar/cuboidal epithelial cell differentiation	8/229	40/8043	1.33748e-05	0.000341277	0.000259296	DLL1/SOX11/GATA6/NKX3-2/PDX1/GATA4/NKX2-2/SMO	8
MII_Mo	GO:0031327	negative regulation of cellular biosynthetic process	29/229	433/8043	1.35218e-05	0.000341279	0.000259297	OLIG3/DLL4/PRDM12/IGF2/FGF19/PITX1/KLF11/SOX11/OSR2/SNAI2/GATA6/TAL1/GATA3/PDX1/CBX4/SOX9/IGF2BP1/OLIG2/VENTX/GLI2/NR4A2/DLX1/NKX2-5/SFRP1/ID1/SMO/TSPYL2/AR/SOX3	29
MII_Mo	GO:0014032	neural crest cell development	6/229	20/8043	1.38377e-05	0.000345497	0.000262502	SEMA6A/SOX11/SNAI2/SOX9/GBX2/SMO	6
MII_Mo	GO:0048812	neuron projection morphogenesis	16/229	163/8043	1.48578e-05	0.000367019	0.000278854	LHX2/SEMA6A/POU4F3/DPYSL5/GDF7/CDH11/PHACTR1/ISLR2/POU4F2/NTN1/DPYSL4/GLI2/NR4A2/GBX2/SMO/EVX1	16
MII_Mo	GO:0070848	response to growth factor	18/229	202/8043	1.65591e-05	0.000402586	0.000305877	DLL1/DLL4/NTRK3/FGF19/GDF7/SOX11/SNAI2/CYR61/GATA6/FGF5/GATA3/FGF9/SOX9/ACVR1C/DLX1/SFRP1/BMP7/APLN	18
MII_Mo	GO:0045597	positive regulation of cell differentiation	21/229	262/8043	1.66444e-05	0.000402586	0.000305877	MYOD1/GDF7/SOX11/SOX17/CYR61/DMRTA2/TAL1/ISLR2/POU4F2/GATA3/RGCC/SOX9/NTN1/OLIG2/GLI2/DLX1/NKX2-5/SFRP1/NKX2-2/SMO/AR	21
MII_Mo	GO:0009890	negative regulation of biosynthetic process	29/229	439/8043	1.75559e-05	0.00041975	0.000318918	OLIG3/DLL4/PRDM12/IGF2/FGF19/PITX1/KLF11/SOX11/OSR2/SNAI2/GATA6/TAL1/GATA3/PDX1/CBX4/SOX9/IGF2BP1/OLIG2/VENTX/GLI2/NR4A2/DLX1/NKX2-5/SFRP1/ID1/SMO/TSPYL2/AR/SOX3	29
MII_Mo	GO:0048514	blood vessel morphogenesis	18/229	203/8043	1.77155e-05	0.00041975	0.000318918	DLL1/DLL4/ANGPTL4/SOX17/CYR61/GATA6/TAL1/KIAA1024/PKD2/PIK3CG/VASH2/RGCC/HOXB13/GATA2/GBX2/SMO/HOXA3/APLN	18
MII_Mo	GO:0003206	cardiac chamber morphogenesis	9/229	54/8043	1.82958e-05	0.000427047	0.000324462	DLL4/SOX11/CYR61/GATA6/GATA3/GATA4/TBX3/NKX2-5/SMO	9
MII_Mo	GO:0048762	mesenchymal cell differentiation	11/229	82/8043	1.85007e-05	0.000427047	0.000324462	SEMA6A/SIX2/SOX11/SNAI2/RGCC/SOX9/TBX3/GBX2/SFRP1/FOXA2/SMO	11
MII_Mo	GO:0048864	stem cell development	6/229	21/8043	1.89148e-05	0.000427047	0.000324462	SEMA6A/SOX11/SNAI2/SOX9/GBX2/SMO	6
MII_Mo	GO:0045892	negative regulation of transcription, DNA-templated	25/229	350/8043	1.89648e-05	0.000427047	0.000324462	OLIG3/DLL4/PRDM12/IGF2/PITX1/KLF11/SOX11/OSR2/GATA6/TAL1/GATA3/PDX1/CBX4/SOX9/OLIG2/VENTX/GLI2/NR4A2/DLX1/NKX2-5/SFRP1/ID1/SMO/AR/SOX3	25
MII_Mo	GO:0072210	metanephric nephron development	5/229	13/8043	1.9127e-05	0.000427047	0.000324462	SIX2/SALL1/PKD2/SOX9/SMO	5
MII_Mo	GO:0072273	metanephric nephron morphogenesis	5/229	13/8043	1.9127e-05	0.000427047	0.000324462	SIX2/SALL1/PKD2/SOX9/SMO	5
MII_Mo	GO:1902679	negative regulation of RNA biosynthetic process	25/229	351/8043	1.99088e-05	0.000436115	0.000331352	OLIG3/DLL4/PRDM12/IGF2/PITX1/KLF11/SOX11/OSR2/GATA6/TAL1/GATA3/PDX1/CBX4/SOX9/OLIG2/VENTX/GLI2/NR4A2/DLX1/NKX2-5/SFRP1/ID1/SMO/AR/SOX3	25
MII_Mo	GO:1903507	negative regulation of nucleic acid-templated transcription	25/229	351/8043	1.99088e-05	0.000436115	0.000331352	OLIG3/DLL4/PRDM12/IGF2/PITX1/KLF11/SOX11/OSR2/GATA6/TAL1/GATA3/PDX1/CBX4/SOX9/OLIG2/VENTX/GLI2/NR4A2/DLX1/NKX2-5/SFRP1/ID1/SMO/AR/SOX3	25
MII_Mo	GO:0060411	cardiac septum morphogenesis	7/229	31/8043	2.03034e-05	0.000440603	0.000334762	SOX11/CYR61/GATA6/GATA4/TBX3/NKX2-5/SMO	7
MII_Mo	GO:0061138	morphogenesis of a branching epithelium	11/229	83/8043	2.07999e-05	0.000447199	0.000339773	DLL4/SIX2/GDF7/PKD2/SOX9/TBX3/GLI2/GBX2/SFRP1/SMO/AR	11
MII_Mo	GO:0048858	cell projection morphogenesis	16/229	168/8043	2.17318e-05	0.000458738	0.00034854	LHX2/SEMA6A/POU4F3/DPYSL5/GDF7/CDH11/PHACTR1/ISLR2/POU4F2/NTN1/DPYSL4/GLI2/NR4A2/GBX2/SMO/EVX1	16
MII_Mo	GO:0120039	plasma membrane bounded cell projection morphogenesis	16/229	168/8043	2.17318e-05	0.000458738	0.00034854	LHX2/SEMA6A/POU4F3/DPYSL5/GDF7/CDH11/PHACTR1/ISLR2/POU4F2/NTN1/DPYSL4/GLI2/NR4A2/GBX2/SMO/EVX1	16
MII_Mo	GO:0019827	stem cell population maintenance	8/229	43/8043	2.34272e-05	0.000485696	0.000369022	DLL1/SIX2/TAL1/SOX9/IGF2BP1/TBX3/SFRP1/SMO	8
MII_Mo	GO:0098727	maintenance of cell number	8/229	43/8043	2.34272e-05	0.000485696	0.000369022	DLL1/SIX2/TAL1/SOX9/IGF2BP1/TBX3/SFRP1/SMO	8
MII_Mo	GO:0032990	cell part morphogenesis	16/229	170/8043	2.51904e-05	0.00051664	0.000392533	LHX2/SEMA6A/POU4F3/DPYSL5/GDF7/CDH11/PHACTR1/ISLR2/POU4F2/NTN1/DPYSL4/GLI2/NR4A2/GBX2/SMO/EVX1	16
MII_Mo	GO:0061326	renal tubule development	7/229	32/8043	2.53648e-05	0.00051664	0.000392533	DLL1/SIX2/LGR5/PKD2/GATA3/SOX9/SMO	7
MII_Mo	GO:0016049	cell growth	13/229	117/8043	2.58285e-05	0.000520129	0.000395184	IGFBPL1/LHX2/SEMA6A/POU4F3/SOX17/KIAA1024/ISLR2/POU4F2/SOX9/NTN1/ADRA1A/SFRP1/TSPYL2	13
MII_Mo	GO:0000902	cell morphogenesis	22/229	291/8043	2.5984e-05	0.000520129	0.000395184	LHX2/SEMA6A/POU4F3/ANTXR1/DPYSL5/GDF7/SOX17/CDC42EP1/CDH11/TAL1/PHACTR1/ISLR2/POU4F2/NTN1/CDHR1/DPYSL4/GLI2/NR4A2/GBX2/SMO/EVX1/AR	22
MII_Mo	GO:0051253	negative regulation of RNA metabolic process	26/229	380/8043	2.71188e-05	0.000538204	0.000408917	OLIG3/DLL4/PRDM12/IGF2/PITX1/KLF11/SOX11/OSR2/GATA6/TAL1/GATA3/PDX1/CBX4/SOX9/IGF2BP1/OLIG2/VENTX/GLI2/NR4A2/DLX1/NKX2-5/SFRP1/ID1/SMO/AR/SOX3	26
MII_Mo	GO:0042471	ear morphogenesis	8/229	44/8043	2.79387e-05	0.000547282	0.000415814	POU4F3/OTX1/SIX2/OSR2/NKX3-2/SOX9/GLI2/GBX2	8
MII_Mo	GO:0032989	cellular component morphogenesis	18/229	210/8043	2.80476e-05	0.000547282	0.000415814	LHX2/SEMA6A/POU4F3/DPYSL5/GDF7/CDH11/PHACTR1/ISLR2/POU4F2/NEBL/NTN1/ACTA1/DPYSL4/GLI2/NR4A2/GBX2/SMO/EVX1	18
MII_Mo	GO:0051094	positive regulation of developmental process	28/229	428/8043	2.96114e-05	0.00057298	0.000435339	DLL1/NR5A1/MYOD1/GDF7/SOX11/OSR2/SOX17/CYR61/GATA6/DMRTA2/TAL1/ISLR2/PPARGC1A/POU4F2/VASH2/GATA3/RGCC/SOX9/NTN1/GATA2/OLIG2/GLI2/DLX1/NKX2-5/SFRP1/NKX2-2/SMO/AR	28
MII_Mo	GO:0061448	connective tissue development	12/229	102/8043	2.986e-05	0.000573017	0.000435367	PITX1/SIX2/GDF7/OSR2/SNAI2/CYR61/NKX3-2/PPARGC1A/POU4F2/SOX9/GLI2/HOXA3	12
MII_Mo	GO:2000113	negative regulation of cellular macromolecule biosynthetic process	27/229	406/8043	3.11576e-05	0.000590794	0.000448874	OLIG3/DLL4/PRDM12/IGF2/PITX1/KLF11/SOX11/OSR2/GATA6/TAL1/GATA3/PDX1/CBX4/SOX9/IGF2BP1/OLIG2/VENTX/GLI2/NR4A2/DLX1/NKX2-5/SFRP1/ID1/SMO/TSPYL2/AR/SOX3	27
MII_Mo	GO:0001525	angiogenesis	16/229	173/8043	3.12953e-05	0.000590794	0.000448874	DLL1/DLL4/ANGPTL4/SOX17/CYR61/GATA6/TAL1/KIAA1024/PIK3CG/VASH2/RGCC/HOXB13/GATA2/GBX2/HOXA3/APLN	16
MII_Mo	GO:0010558	negative regulation of macromolecule biosynthetic process	27/229	407/8043	3.25379e-05	0.000599966	0.000455843	OLIG3/DLL4/PRDM12/IGF2/PITX1/KLF11/SOX11/OSR2/GATA6/TAL1/GATA3/PDX1/CBX4/SOX9/IGF2BP1/OLIG2/VENTX/GLI2/NR4A2/DLX1/NKX2-5/SFRP1/ID1/SMO/TSPYL2/AR/SOX3	27
MII_Mo	GO:0001654	eye development	11/229	87/8043	3.26497e-05	0.000599966	0.000455843	DLL1/DLL4/SIX6/LHX2/SOX11/OSR2/PROM1/POU4F2/PTF1A/SOX9/DLX1	11
MII_Mo	GO:0150063	visual system development	11/229	87/8043	3.26497e-05	0.000599966	0.000455843	DLL1/DLL4/SIX6/LHX2/SOX11/OSR2/PROM1/POU4F2/PTF1A/SOX9/DLX1	11
MII_Mo	GO:0048754	branching morphogenesis of an epithelial tube	10/229	72/8043	3.28147e-05	0.000599966	0.000455843	DLL4/SIX2/GDF7/PKD2/SOX9/TBX3/GLI2/GBX2/SMO/AR	10
MII_Mo	GO:0014031	mesenchymal cell development	6/229	23/8043	3.35438e-05	0.000603789	0.000458747	SEMA6A/SOX11/SNAI2/SOX9/GBX2/SMO	6
MII_Mo	GO:0031018	endocrine pancreas development	6/229	23/8043	3.35438e-05	0.000603789	0.000458747	DLL1/PDX1/SOX9/NKX2-2/FOXA2/SMO	6
MII_Mo	GO:0050679	positive regulation of epithelial cell proliferation	10/229	73/8043	3.70884e-05	0.000662456	0.000503321	IGF2/SOX11/OSR2/VASH2/FGF9/SOX9/SFRP1/SMO/AR/APLN	10
MII_Mo	GO:0003205	cardiac chamber development	9/229	59/8043	3.81984e-05	0.000677073	0.000514427	DLL4/SOX11/CYR61/GATA6/GATA3/GATA4/TBX3/NKX2-5/SMO	9
MII_Mo	GO:0072009	nephron epithelium development	7/229	34/8043	3.8619e-05	0.000679343	0.000516152	DLL1/SIX2/SALL1/PKD2/GATA3/SOX9/SMO	7
MII_Mo	GO:0001763	morphogenesis of a branching structure	11/229	89/8043	4.04986e-05	0.000707051	0.000537204	DLL4/SIX2/GDF7/PKD2/SOX9/TBX3/GLI2/GBX2/SFRP1/SMO/AR	11
MII_Mo	GO:0003338	metanephros morphogenesis	5/229	15/8043	4.25909e-05	0.000732564	0.000556588	SIX2/SALL1/PKD2/SOX9/SMO	5
MII_Mo	GO:0021517	ventral spinal cord development	5/229	15/8043	4.25909e-05	0.000732564	0.000556588	OLIG3/DLL4/OLIG2/GLI2/NKX2-2	5
MII_Mo	GO:0071363	cellular response to growth factor stimulus	17/229	197/8043	4.31883e-05	0.000737377	0.000560245	DLL1/DLL4/NTRK3/FGF19/GDF7/SOX11/SNAI2/CYR61/FGF5/GATA3/FGF9/SOX9/ACVR1C/DLX1/SFRP1/BMP7/APLN	17
MII_Mo	GO:0003407	neural retina development	6/229	24/8043	4.3669e-05	0.000737676	0.000560472	DLL4/PROM1/POU4F2/PTF1A/SOX9/DLX1	6
MII_Mo	GO:0001649	osteoblast differentiation	9/229	60/8043	4.38412e-05	0.000737676	0.000560472	SOX11/SNAI2/CYR61/BMP3/SOX9/GLI2/SFRP1/CYP24A1/SMO	9
MII_Mo	GO:0001822	kidney development	11/229	90/8043	4.49981e-05	0.000751695	0.000571123	DLL1/SIX2/OSR2/SOX17/SALL1/PKD2/GATA3/SOX9/GLI2/SFRP1/SMO	11
MII_Mo	GO:0072006	nephron development	7/229	35/8043	4.71166e-05	0.000781462	0.00059374	DLL1/SIX2/SALL1/PKD2/GATA3/SOX9/SMO	7
MII_Mo	GO:0048880	sensory system development	11/229	91/8043	4.99213e-05	0.000822108	0.000624622	DLL1/DLL4/SIX6/LHX2/SOX11/OSR2/PROM1/POU4F2/PTF1A/SOX9/DLX1	11
MII_Mo	GO:0008544	epidermis development	10/229	76/8043	5.28786e-05	0.000860882	0.000654082	DLL1/FOXE1/LHX2/KEAP1/POU4F3/LGR5/GATA6/SOX9/GLI2/SMO	10
MII_Mo	GO:0014706	striated muscle tissue development	12/229	108/8043	5.30173e-05	0.000860882	0.000654082	DLL1/DLL4/MYOD1/PITX1/SOX11/DMRTA2/NEBL/ADRA1A/TBX3/ACTA1/NKX2-5/SMO	12
MII_Mo	GO:0048863	stem cell differentiation	9/229	62/8043	5.72591e-05	0.000923303	0.000701508	SEMA6A/SOX11/SOX17/SNAI2/TAL1/SOX9/GBX2/SFRP1/SMO	9
MII_Mo	GO:0008406	gonad development	11/229	93/8043	6.11706e-05	0.000964848	0.000733072	NR5A1/SALL1/GATA6/LHX9/GATA3/SOX9/GATA4/SFRP1/TFAP2C/HOXA10/AR	11
MII_Mo	GO:0045137	development of primary sexual characteristics	11/229	93/8043	6.11706e-05	0.000964848	0.000733072	NR5A1/SALL1/GATA6/LHX9/GATA3/SOX9/GATA4/SFRP1/TFAP2C/HOXA10/AR	11
MII_Mo	GO:0043066	negative regulation of apoptotic process	21/229	286/8043	6.12473e-05	0.000964848	0.000733072	DLL1/ANGPTL4/ST3GAL1/SNAI2/CYR61/GATA6/PTGFR/TFAP2D/NKX3-2/PPARGC1A/GATA3/PDX1/SOX9/TBX3/GLI2/NR4A2/DLX1/NKX2-5/SFRP1/SMO/AR	21
MII_Mo	GO:0050678	regulation of epithelial cell proliferation	13/229	127/8043	6.1701e-05	0.000964848	0.000733072	DLL4/IGF2/SOX11/OSR2/SNAI2/VASH2/FGF9/RGCC/SOX9/SFRP1/SMO/AR/APLN	13
MII_Mo	GO:0035107	appendage morphogenesis	8/229	49/8043	6.28845e-05	0.000964848	0.000733072	PITX1/SOX11/OSR2/SALL1/SOX9/TBX3/GLI2/HOXA10	8
MII_Mo	GO:0035108	limb morphogenesis	8/229	49/8043	6.28845e-05	0.000964848	0.000733072	PITX1/SOX11/OSR2/SALL1/SOX9/TBX3/GLI2/HOXA10	8
MII_Mo	GO:0072073	kidney epithelium development	8/229	49/8043	6.28845e-05	0.000964848	0.000733072	DLL1/SIX2/SALL1/PKD2/GATA3/SOX9/SFRP1/SMO	8
MII_Mo	GO:0060284	regulation of cell development	15/229	164/8043	6.31597e-05	0.000964848	0.000733072	DLL1/DLL4/LHX2/MYOD1/SEMA6A/SOX11/HES2/DMRTA2/ISLR2/POU4F2/NTN1/OLIG2/DLX1/NKX2-2/SMO	15
MII_Mo	GO:0043010	camera-type eye development	10/229	78/8043	6.63243e-05	0.00100657	0.000764771	DLL1/DLL4/LHX2/SOX11/OSR2/PROM1/POU4F2/PTF1A/SOX9/DLX1	10
MII_Mo	GO:0060548	negative regulation of cell death	22/229	310/8043	6.79173e-05	0.00102405	0.000778054	DLL1/ANGPTL4/SOX11/ST3GAL1/SNAI2/CYR61/GATA6/PTGFR/TFAP2D/NKX3-2/PPARGC1A/GATA3/PDX1/SOX9/TBX3/GLI2/NR4A2/DLX1/NKX2-5/SFRP1/SMO/AR	22
MII_Mo	GO:0048706	embryonic skeletal system development	7/229	37/8043	6.87218e-05	0.0010295	0.000782192	SIX2/SOX11/OSR2/MDFI/NKX3-2/DLX1/HOXA3	7
MII_Mo	GO:0040007	growth	20/229	267/8043	6.98502e-05	0.00103969	0.000789939	DLL1/IGFBPL1/LHX2/MYOD1/SEMA6A/POU4F3/SOX17/KIAA1024/ISLR2/POU4F2/LGR6/SOX9/NTN1/ADRA1A/GLI2/ACVR1C/SFRP1/SMO/TSPYL2/AR	20
MII_Mo	GO:0022037	metencephalon development	6/229	26/8043	7.12133e-05	0.00105323	0.000800224	DLL1/OTX1/PTF1A/GLI2/GBX2/SMO	6
MII_Mo	GO:0001701	in utero embryonic development	13/229	129/8043	7.26242e-05	0.0010673	0.000810913	IGF2/FOSL1/KEAP1/SOX17/CYR61/MDFI/PKD2/VASH2/TBX3/GLI2/ACVR1C/SMO/AR	13
MII_Mo	GO:0008285	negative regulation of cell population proliferation	17/229	207/8043	8.05905e-05	0.00117693	0.000894205	DLL1/DLL4/PTGES/KLF11/SOX11/SNAI2/GATA6/KIAA1024/GATA3/PDX1/RGCC/SOX9/TBX3/ACVR1C/SFRP1/AR/APLN	17
MII_Mo	GO:0061351	neural precursor cell proliferation	7/229	38/8043	8.22224e-05	0.00119318	0.000906554	DLL4/LHX2/DMRTA2/IGF2BP1/GLI2/GBX2/SMO	7
MII_Mo	GO:0071495	cellular response to endogenous stimulus	26/229	406/8043	8.30842e-05	0.00119318	0.000906554	DLL4/NTRK3/NR4A3/NR5A1/IGF2/FGF19/GDF7/SOX11/SNAI2/CYR61/PTGFR/POU4F2/PKD2/FGF5/VIM/GATA3/FGF9/SOX9/ADRA2A/INHBB/NR4A2/DLX1/SFRP1/BMP7/AR/APLN	26
MII_Mo	GO:0032330	regulation of chondrocyte differentiation	5/229	17/8043	8.37589e-05	0.00119318	0.000906554	SIX2/SNAI2/NKX3-2/SOX9/GLI2	5
MII_Mo	GO:0048546	digestive tract morphogenesis	5/229	17/8043	8.37589e-05	0.00119318	0.000906554	SIX2/SOX11/SOX17/GLI2/SFRP1	5
MII_Mo	GO:0048588	developmental cell growth	8/229	51/8043	8.45427e-05	0.001197	0.000909458	LHX2/SEMA6A/POU4F3/ISLR2/POU4F2/SOX9/NTN1/ADRA1A	8
MII_Mo	GO:0048589	developmental growth	16/229	188/8043	8.5894e-05	0.00120876	0.000918395	DLL1/LHX2/MYOD1/SEMA6A/POU4F3/ISLR2/POU4F2/LGR6/SOX9/NTN1/ADRA1A/GLI2/ACVR1C/SFRP1/SMO/AR	16
MII_Mo	GO:0045665	negative regulation of neuron differentiation	6/229	27/8043	8.94009e-05	0.00122834	0.000933266	DLL1/POU4F2/SOX9/OLIG2/DLX1/NKX2-2	6
MII_Mo	GO:0061333	renal tubule morphogenesis	6/229	27/8043	8.94009e-05	0.00122834	0.000933266	SIX2/LGR5/PKD2/GATA3/SOX9/SMO	6
MII_Mo	GO:0072028	nephron morphogenesis	6/229	27/8043	8.94009e-05	0.00122834	0.000933266	SIX2/SALL1/PKD2/GATA3/SOX9/SMO	6
MII_Mo	GO:0072088	nephron epithelium morphogenesis	6/229	27/8043	8.94009e-05	0.00122834	0.000933266	SIX2/SALL1/PKD2/GATA3/SOX9/SMO	6
MII_Mo	GO:0045934	negative regulation of nucleobase-containing compound metabolic process	26/229	409/8043	9.38205e-05	0.00128148	0.000973642	OLIG3/DLL4/PRDM12/IGF2/PITX1/KLF11/SOX11/OSR2/GATA6/TAL1/GATA3/PDX1/CBX4/SOX9/IGF2BP1/OLIG2/VENTX/GLI2/NR4A2/DLX1/NKX2-5/SFRP1/ID1/SMO/AR/SOX3	26
MII_Mo	GO:0043269	regulation of ion transport	25/229	388/8043	0.000104021	0.0014125	0.00107319	LIPG/GALR1/NR4A3/PTGES/FGF19/SYT12/KCNS3/KCND3/KCNA2/RASGRF1/CHGA/LRAT/POU4F2/PKD2/KCNE3/PDX1/FGF14/KCNJ15/KCNMA1/ADRA2A/INHBB/ACVR1C/SFRP1/SMO/KCNE5	25
MII_Mo	GO:0043069	negative regulation of programmed cell death	21/229	297/8043	0.00010532	0.00142182	0.00108027	DLL1/ANGPTL4/ST3GAL1/SNAI2/CYR61/GATA6/PTGFR/TFAP2D/NKX3-2/PPARGC1A/GATA3/PDX1/SOX9/TBX3/GLI2/NR4A2/DLX1/NKX2-5/SFRP1/SMO/AR	21
MII_Mo	GO:0120036	plasma membrane bounded cell projection organization	25/229	389/8043	0.000108383	0.00145471	0.00110526	NTRK3/LHX2/PRDM12/SEMA6A/POU4F3/DPYSL5/GDF7/CDC42EP1/CDH11/PHACTR1/RASGRF1/ISLR2/POU4F2/PKD2/VASH2/NTN1/NEFL/DPYSL4/GLI2/NR4A2/GBX2/SFRP1/SMO/EVX1/SEPT6	25
MII_Mo	GO:0050673	epithelial cell proliferation	14/229	153/8043	0.000110577	0.00147563	0.00112116	DLL4/IGF2/SOX11/OSR2/SNAI2/LGR5/VASH2/FGF9/RGCC/SOX9/SFRP1/SMO/AR/APLN	14
MII_Mo	GO:1905114	cell surface receptor signaling pathway involved in cell-cell signaling	14/229	156/8043	0.000136197	0.00175476	0.00133323	RSPO3/SOX17/SNAI2/WNT10B/LGR5/SALL1/WNT4/LGR6/GATA3/SOX9/FZD10/GLI2/SFRP1/SMO	14
MII_Mo	GO:0044344	cellular response to fibroblast growth factor stimulus	7/229	41/8043	0.000136207	0.00175476	0.00133323	DLL4/FGF19/FGF5/GATA3/FGF9/SFRP1/APLN	7
MII_Mo	GO:0071774	response to fibroblast growth factor	7/229	41/8043	0.000136207	0.00175476	0.00133323	DLL4/FGF19/FGF5/GATA3/FGF9/SFRP1/APLN	7
MII_Mo	GO:0001942	hair follicle development	6/229	29/8043	0.000136784	0.00175476	0.00133323	FOXE1/LHX2/LGR5/SOX9/GLI2/SMO	6
MII_Mo	GO:0022404	molting cycle process	6/229	29/8043	0.000136784	0.00175476	0.00133323	FOXE1/LHX2/LGR5/SOX9/GLI2/SMO	6
MII_Mo	GO:0022405	hair cycle process	6/229	29/8043	0.000136784	0.00175476	0.00133323	FOXE1/LHX2/LGR5/SOX9/GLI2/SMO	6
MII_Mo	GO:0048675	axon extension	6/229	29/8043	0.000136784	0.00175476	0.00133323	LHX2/SEMA6A/POU4F3/ISLR2/POU4F2/NTN1	6
MII_Mo	GO:0009719	response to endogenous stimulus	28/229	468/8043	0.000142095	0.00180551	0.00137179	DLL4/NTRK3/NR4A3/NR5A1/IGF2/FGF19/GDF7/SOX11/SNAI2/CYR61/PTGFR/POU4F2/PKD2/FGF5/VIM/GATA3/FGF9/SOX9/ITGB2/ADRA2A/INHBB/NR4A2/ACVR1C/DLX1/SFRP1/BMP7/AR/APLN	28
MII_Mo	GO:0007167	enzyme linked receptor protein signaling pathway	22/229	326/8043	0.000142295	0.00180551	0.00137179	DLL1/NTRK3/NR4A3/IGF2/FGF19/GDF7/SOX11/CYR61/BMP3/FGF5/GATA3/FGF9/FLT3/SOX9/ADRA2A/INHBB/ACVR1C/DLX1/SFRP1/BMP7/AR/APLN	22
MII_Mo	GO:0048736	appendage development	8/229	55/8043	0.00014657	0.00183966	0.00139773	PITX1/SOX11/OSR2/SALL1/SOX9/TBX3/GLI2/HOXA10	8
MII_Mo	GO:0060173	limb development	8/229	55/8043	0.00014657	0.00183966	0.00139773	PITX1/SOX11/OSR2/SALL1/SOX9/TBX3/GLI2/HOXA10	8
MII_Mo	GO:0003209	cardiac atrium morphogenesis	5/229	19/8043	0.000150221	0.00187534	0.00142484	DLL4/CYR61/GATA4/NKX2-5/SMO	5
MII_Mo	GO:0001823	mesonephros development	7/229	42/8043	0.00015954	0.00197048	0.00149714	SIX2/OSR2/PKD2/GATA3/SOX9/SFRP1/SMO	7
MII_Mo	GO:0021543	pallium development	7/229	42/8043	0.00015954	0.00197048	0.00149714	LHX2/DMRTA2/PHACTR1/MDGA1/IGF2BP1/DLX1/SMO	7
MII_Mo	GO:0007368	determination of left/right symmetry	6/229	30/8043	0.000166953	0.00202966	0.0015421	DLL1/SOX17/NKX3-2/PKD2/TBX3/SMO	6
MII_Mo	GO:0009953	dorsal/ventral pattern formation	6/229	30/8043	0.000166953	0.00202966	0.0015421	DLL4/LHX2/GLI2/SFRP1/NKX2-2/SMO	6
MII_Mo	GO:0045666	positive regulation of neuron differentiation	6/229	30/8043	0.000166953	0.00202966	0.0015421	GDF7/SOX11/GLI2/DLX1/NKX2-5/NKX2-2	6
MII_Mo	GO:0003283	atrial septum development	4/229	11/8043	0.000180471	0.00214899	0.00163276	CYR61/GATA4/NKX2-5/SMO	4
MII_Mo	GO:0021522	spinal cord motor neuron differentiation	4/229	11/8043	0.000180471	0.00214899	0.00163276	OLIG3/OLIG2/GLI2/NKX2-2	4
MII_Mo	GO:0030857	negative regulation of epithelial cell differentiation	4/229	11/8043	0.000180471	0.00214899	0.00163276	DLL1/SOX9/TBX3/SMO	4
MII_Mo	GO:0061037	negative regulation of cartilage development	4/229	11/8043	0.000180471	0.00214899	0.00163276	SNAI2/NKX3-2/SOX9/GLI2	4
MII_Mo	GO:0001947	heart looping	5/229	20/8043	0.000195682	0.00230646	0.0017524	DLL1/SOX17/PKD2/TBX3/SMO	5
MII_Mo	GO:0003230	cardiac atrium development	5/229	20/8043	0.000195682	0.00230646	0.0017524	DLL4/CYR61/GATA4/NKX2-5/SMO	5
MII_Mo	GO:0060993	kidney morphogenesis	6/229	31/8043	0.000202149	0.00235874	0.00179213	SIX2/SALL1/PKD2/GATA3/SOX9/SMO	6
MII_Mo	GO:0072080	nephron tubule development	6/229	31/8043	0.000202149	0.00235874	0.00179213	DLL1/SIX2/PKD2/GATA3/SOX9/SMO	6
MII_Mo	GO:0050769	positive regulation of neurogenesis	8/229	58/8043	0.000214414	0.00248934	0.00189135	SOX11/DMRTA2/ISLR2/POU4F2/NTN1/OLIG2/NKX2-2/SMO	8
MII_Mo	GO:0030030	cell projection organization	25/229	408/8043	0.000228947	0.00264485	0.00200951	NTRK3/LHX2/PRDM12/SEMA6A/POU4F3/DPYSL5/GDF7/CDC42EP1/CDH11/PHACTR1/RASGRF1/ISLR2/POU4F2/PKD2/VASH2/NTN1/NEFL/DPYSL4/GLI2/NR4A2/GBX2/SFRP1/SMO/EVX1/SEPT6	25
MII_Mo	GO:0003143	embryonic heart tube morphogenesis	5/229	21/8043	0.000250921	0.00282835	0.00214892	DLL1/SOX17/PKD2/TBX3/SMO	5
MII_Mo	GO:0035050	embryonic heart tube development	5/229	21/8043	0.000250921	0.00282835	0.00214892	DLL1/SOX17/PKD2/TBX3/SMO	5
MII_Mo	GO:0046676	negative regulation of insulin secretion	5/229	21/8043	0.000250921	0.00282835	0.00214892	CHGA/ADRA2A/INHBB/ACVR1C/SFRP1	5
MII_Mo	GO:0061371	determination of heart left/right asymmetry	5/229	21/8043	0.000250921	0.00282835	0.00214892	DLL1/SOX17/PKD2/TBX3/SMO	5
MII_Mo	GO:2000177	regulation of neural precursor cell proliferation	5/229	21/8043	0.000250921	0.00282835	0.00214892	DLL4/LHX2/DMRTA2/GLI2/SMO	5
MII_Mo	GO:0006813	potassium ion transport	9/229	75/8043	0.000257167	0.00288404	0.00219124	SLC9A4/KCNS3/KCND3/KCNA2/PKD2/KCNE3/KCNJ15/ADRA2A/KCNE5	9
MII_Mo	GO:0016477	cell migration	28/229	485/8043	0.000258346	0.00288404	0.00219124	OLIG3/DLL4/FOXE1/NR4A3/SEMA6A/FSCN1/SIX2/SOX17/SNAI2/CYR61/PHACTR1/MDGA1/CHGA/FGF5/LGR6/GATA3/FGF9/RGCC/SOX9/NTN1/ITGB2/ADRA2A/NR4A2/ACVR1C/GBX2/SFRP1/SMO/EVX1	28
MII_Mo	GO:0051050	positive regulation of transport	19/229	272/8043	0.000264485	0.00292662	0.00222359	DLL1/LIPG/GALR1/NR4A3/PTGES/FGF19/SOX11/LRAT/POU4F2/PKD2/PDX1/RGCC/ITGB2/ADRA2A/INHBB/SIRPA/SMO/KCNE5/APLN	19
MII_Mo	GO:0071542	dopaminergic neuron differentiation	4/229	12/8043	0.000264682	0.00292662	0.00222359	DMRTA2/NR4A2/SFRP1/FOXA2	4
MII_Mo	GO:0010001	glial cell differentiation	9/229	76/8043	0.000284609	0.00313204	0.00237967	DLL1/SOX11/TAL1/FGF5/SOX9/OLIG2/DLX1/NKX2-2/SMO	9
MII_Mo	GO:0009855	determination of bilateral symmetry	6/229	33/8043	0.000289951	0.00317578	0.0024129	DLL1/SOX17/NKX3-2/PKD2/TBX3/SMO	6
MII_Mo	GO:0043588	skin development	8/229	61/8043	0.000306116	0.0033371	0.00253546	DLL1/FOXE1/LHX2/LGR5/GATA6/SOX9/GLI2/SMO	8
MII_Mo	GO:0021549	cerebellum development	5/229	22/8043	0.000317253	0.00344235	0.00261543	DLL1/PTF1A/GLI2/GBX2/SMO	5
MII_Mo	GO:0198738	cell-cell signaling by wnt	13/229	150/8043	0.000333037	0.0035968	0.00273278	RSPO3/SOX17/SNAI2/WNT10B/LGR5/SALL1/WNT4/PKD2/LGR6/GATA3/SOX9/FZD10/SFRP1	13
MII_Mo	GO:0021537	telencephalon development	8/229	62/8043	0.000342984	0.00362873	0.00275704	LHX2/SALL1/DMRTA2/PHACTR1/MDGA1/IGF2BP1/DLX1/SMO	8
MII_Mo	GO:0009799	specification of symmetry	6/229	34/8043	0.000343808	0.00362873	0.00275704	DLL1/SOX17/NKX3-2/PKD2/TBX3/SMO	6
MII_Mo	GO:0042303	molting cycle	6/229	34/8043	0.000343808	0.00362873	0.00275704	FOXE1/LHX2/LGR5/SOX9/GLI2/SMO	6
MII_Mo	GO:0042633	hair cycle	6/229	34/8043	0.000343808	0.00362873	0.00275704	FOXE1/LHX2/LGR5/SOX9/GLI2/SMO	6
MII_Mo	GO:0061035	regulation of cartilage development	6/229	34/8043	0.000343808	0.00362873	0.00275704	SIX2/SNAI2/CYR61/NKX3-2/SOX9/GLI2	6
MII_Mo	GO:0051216	cartilage development	9/229	78/8043	0.000346794	0.00364369	0.0027684	PITX1/SIX2/OSR2/SNAI2/CYR61/NKX3-2/SOX9/GLI2/HOXA3	9
MII_Mo	GO:0034762	regulation of transmembrane transport	14/229	171/8043	0.0003563	0.00371	0.00281878	NR4A3/FGF19/KCNS3/KCND3/KCNA2/RASGRF1/POU4F2/PKD2/KCNE3/FGF14/KCNJ15/KCNMA1/ADRA2A/KCNE5	14
MII_Mo	GO:0034765	regulation of ion transmembrane transport	14/229	171/8043	0.0003563	0.00371	0.00281878	NR4A3/FGF19/KCNS3/KCND3/KCNA2/RASGRF1/POU4F2/PKD2/KCNE3/FGF14/KCNJ15/KCNMA1/ADRA2A/KCNE5	14
MII_Mo	GO:0003309	type B pancreatic cell differentiation	4/229	13/8043	0.000373817	0.0038238	0.00290525	DLL1/PDX1/NKX2-2/SMO	4
MII_Mo	GO:0035850	epithelial cell differentiation involved in kidney development	4/229	13/8043	0.000373817	0.0038238	0.00290525	SIX2/SALL1/GATA3/SMO	4
MII_Mo	GO:0035883	enteroendocrine cell differentiation	4/229	13/8043	0.000373817	0.0038238	0.00290525	DLL1/PDX1/NKX2-2/SMO	4
MII_Mo	GO:0060674	placenta blood vessel development	4/229	13/8043	0.000373817	0.0038238	0.00290525	FOSL1/CYR61/PKD2/VASH2	4
MII_Mo	GO:0071805	potassium ion transmembrane transport	8/229	63/8043	0.000383393	0.00390455	0.0029666	SLC9A4/KCNS3/KCND3/KCNA2/PKD2/KCNE3/KCNJ15/KCNE5	8
MII_Mo	GO:0001503	ossification	12/229	133/8043	0.000389777	0.00395223	0.00300283	IGF2/SIX2/SOX11/OSR2/SNAI2/CYR61/BMP3/SOX9/GLI2/SFRP1/CYP24A1/SMO	12
MII_Mo	GO:0001838	embryonic epithelial tube formation	6/229	35/8043	0.000405192	0.00407297	0.00309456	LHX2/GDF7/SOX11/GATA3/SOX9/SFRP1	6
MII_Mo	GO:1905330	regulation of morphogenesis of an epithelium	6/229	35/8043	0.000405192	0.00407297	0.00309456	SIX2/GATA3/SOX9/SFRP1/SMO/AR	6
MII_Mo	GO:0010817	regulation of hormone levels	15/229	196/8043	0.000455865	0.00456258	0.00346656	GALR1/FOXE1/NR5A1/SOX11/CHGA/LRAT/GATA3/PDX1/TBX3/ADRA2A/INHBB/ACVR1C/SFRP1/PCSK2/DIO3	15
MII_Mo	GO:0048708	astrocyte differentiation	5/229	24/8043	0.000488796	0.00487118	0.00370103	DLL1/TAL1/SOX9/NKX2-2/SMO	5
MII_Mo	GO:0048705	skeletal system morphogenesis	9/229	82/8043	0.000505007	0.00501122	0.00380743	SIX2/SOX11/OSR2/MDFI/NKX3-2/SOX9/CHAD/SFRP1/HOXA3	9
MII_Mo	GO:0021532	neural tube patterning	4/229	14/8043	0.000511717	0.0050562	0.00384161	SOX17/GLI2/GBX2/SMO	4
MII_Mo	GO:0021987	cerebral cortex development	5/229	25/8043	0.000596969	0.00579985	0.00440661	LHX2/DMRTA2/PHACTR1/MDGA1/SMO	5
MII_Mo	GO:0060675	ureteric bud morphogenesis	5/229	25/8043	0.000596969	0.00579985	0.00440661	SIX2/PKD2/GATA3/SOX9/SMO	5
MII_Mo	GO:0072078	nephron tubule morphogenesis	5/229	25/8043	0.000596969	0.00579985	0.00440661	SIX2/PKD2/GATA3/SOX9/SMO	5
MII_Mo	GO:0072171	mesonephric tubule morphogenesis	5/229	25/8043	0.000596969	0.00579985	0.00440661	SIX2/PKD2/GATA3/SOX9/SMO	5
MII_Mo	GO:0030902	hindbrain development	6/229	38/8043	0.000641759	0.00618325	0.00469791	DLL1/OTX1/PTF1A/GLI2/GBX2/SMO	6
MII_Mo	GO:1990138	neuron projection extension	6/229	38/8043	0.000641759	0.00618325	0.00469791	LHX2/SEMA6A/POU4F3/ISLR2/POU4F2/NTN1	6
MII_Mo	GO:0060560	developmental growth involved in morphogenesis	8/229	68/8043	0.000647711	0.00621482	0.0047219	LHX2/SEMA6A/POU4F3/ISLR2/POU4F2/SOX9/NTN1/SFRP1	8
MII_Mo	GO:0002066	columnar/cuboidal epithelial cell development	4/229	15/8043	0.000682309	0.00649312	0.00493335	DLL1/NKX3-2/NKX2-2/SMO	4
MII_Mo	GO:0048566	embryonic digestive tract development	4/229	15/8043	0.000682309	0.00649312	0.00493335	SIX2/SOX11/SALL1/GLI2	4
MII_Mo	GO:0001764	neuron migration	6/229	39/8043	0.000740658	0.00696279	0.00529019	OLIG3/SEMA6A/PHACTR1/MDGA1/NR4A2/EVX1	6
MII_Mo	GO:0030326	embryonic limb morphogenesis	6/229	39/8043	0.000740658	0.00696279	0.00529019	PITX1/OSR2/SALL1/TBX3/GLI2/HOXA10	6
MII_Mo	GO:0035113	embryonic appendage morphogenesis	6/229	39/8043	0.000740658	0.00696279	0.00529019	PITX1/OSR2/SALL1/TBX3/GLI2/HOXA10	6
MII_Mo	GO:0016055	Wnt signaling pathway	12/229	145/8043	0.000850344	0.00784082	0.0059573	RSPO3/SOX17/SNAI2/WNT10B/LGR5/SALL1/WNT4/LGR6/GATA3/SOX9/FZD10/SFRP1	12
MII_Mo	GO:0030856	regulation of epithelial cell differentiation	6/229	40/8043	0.000850942	0.00784082	0.0059573	DLL1/KEAP1/GATA3/SOX9/TBX3/SMO	6
MII_Mo	GO:0035051	cardiocyte differentiation	6/229	40/8043	0.000850942	0.00784082	0.0059573	DLL1/SOX17/GATA6/NEBL/ADRA1A/TBX3	6
MII_Mo	GO:0072175	epithelial tube formation	6/229	40/8043	0.000850942	0.00784082	0.0059573	LHX2/GDF7/SOX11/GATA3/SOX9/SFRP1	6
MII_Mo	GO:2000027	regulation of animal organ morphogenesis	6/229	40/8043	0.000850942	0.00784082	0.0059573	SIX2/GATA3/SOX9/SFRP1/SMO/AR	6
MII_Mo	GO:0003281	ventricular septum development	5/229	27/8043	0.000865956	0.00791634	0.00601468	SOX11/CYR61/GATA3/TBX3/NKX2-5	5
MII_Mo	GO:0009798	axis specification	5/229	27/8043	0.000865956	0.00791634	0.00601468	DLL1/SIX2/TBX3/SFRP1/SMO	5
MII_Mo	GO:0007519	skeletal muscle tissue development	7/229	55/8043	0.000876796	0.00797523	0.00605943	DLL1/MYOD1/PITX1/SOX11/DMRTA2/ACTA1/SMO	7
MII_Mo	GO:0061005	cell differentiation involved in kidney development	4/229	16/8043	0.000889572	0.00797523	0.00605943	SIX2/SALL1/GATA3/SMO	4
MII_Mo	GO:0061614	pri-miRNA transcription by RNA polymerase II	4/229	16/8043	0.000889572	0.00797523	0.00605943	FOSL1/SOX9/GATA2/APLN	4
MII_Mo	GO:0090183	regulation of kidney development	4/229	16/8043	0.000889572	0.00797523	0.00605943	SIX2/GATA3/SOX9/SMO	4
MII_Mo	GO:1902893	regulation of pri-miRNA transcription by RNA polymerase II	4/229	16/8043	0.000889572	0.00797523	0.00605943	FOSL1/SOX9/GATA2/APLN	4
MII_Mo	GO:0001657	ureteric bud development	6/229	41/8043	0.000973468	0.00862745	0.00655497	SIX2/PKD2/GATA3/SOX9/SFRP1/SMO	6
MII_Mo	GO:0072163	mesonephric epithelium development	6/229	41/8043	0.000973468	0.00862745	0.00655497	SIX2/PKD2/GATA3/SOX9/SFRP1/SMO	6
MII_Mo	GO:0072164	mesonephric tubule development	6/229	41/8043	0.000973468	0.00862745	0.00655497	SIX2/PKD2/GATA3/SOX9/SFRP1/SMO	6
MII_Mo	GO:0090278	negative regulation of peptide hormone secretion	5/229	28/8043	0.00103005	0.00906984	0.00689109	CHGA/ADRA2A/INHBB/ACVR1C/SFRP1	5
MII_Mo	GO:0061061	muscle structure development	15/229	212/8043	0.0010312	0.00906984	0.00689109	DLL1/DLL4/IGF2/MYOD1/PITX1/SOX11/GATA6/DMRTA2/NEBL/SOX9/ADRA1A/TBX3/ACTA1/NKX2-5/SMO	15
MII_Mo	GO:0042981	regulation of apoptotic process	25/229	453/8043	0.00107805	0.00944618	0.00717703	DLL1/ANGPTL4/KLF11/ST3GAL1/SNAI2/CYR61/GATA6/PTGFR/TFAP2D/NKX3-2/PPARGC1A/PHLDA3/GATA3/PDX1/RGCC/SOX9/TBX3/GLI2/NR4A2/ACVR1C/DLX1/NKX2-5/SFRP1/SMO/AR	25
MII_Mo	GO:0002062	chondrocyte differentiation	6/229	42/8043	0.00110912	0.00968189	0.00735611	SIX2/OSR2/SNAI2/NKX3-2/SOX9/GLI2	6
MII_Mo	GO:0040012	regulation of locomotion	19/229	307/8043	0.00117106	0.0101843	0.00773784	DLL4/NR4A3/CHRM1/SEMA6A/SNAI2/CYR61/PHACTR1/POU4F2/FGF5/LGR6/GATA3/FGF9/RGCC/SOX9/NTN1/ADRA2A/ACVR1C/SFRP1/SMO	19
MII_Mo	GO:0060538	skeletal muscle organ development	7/229	58/8043	0.00120864	0.0104719	0.00795632	DLL1/MYOD1/PITX1/SOX11/DMRTA2/ACTA1/SMO	7
MII_Mo	GO:0051962	positive regulation of nervous system development	8/229	75/8043	0.00124656	0.0107603	0.00817544	SOX11/DMRTA2/ISLR2/POU4F2/NTN1/OLIG2/NKX2-2/SMO	8
MII_Mo	GO:0010720	positive regulation of cell development	9/229	93/8043	0.00126483	0.0108775	0.00826452	MYOD1/SOX11/DMRTA2/ISLR2/POU4F2/NTN1/OLIG2/NKX2-2/SMO	9
MII_Mo	GO:0048839	inner ear development	7/229	59/8043	0.00133876	0.0114708	0.00871531	DLL1/POU4F3/OTX1/LGR5/SOX9/GLI2/GBX2	7
MII_Mo	GO:0035148	tube formation	6/229	44/8043	0.00142349	0.0121288	0.00921521	LHX2/GDF7/SOX11/GATA3/SOX9/SFRP1	6
MII_Mo	GO:0048704	embryonic skeletal system morphogenesis	5/229	30/8043	0.00142599	0.0121288	0.00921521	SIX2/SOX11/OSR2/MDFI/HOXA3	5
MII_Mo	GO:0042063	gliogenesis	9/229	95/8043	0.00147113	0.012467	0.00947219	DLL1/SOX11/TAL1/FGF5/SOX9/OLIG2/DLX1/NKX2-2/SMO	9
MII_Mo	GO:0010941	regulation of cell death	26/229	490/8043	0.00151138	0.0127615	0.00969595	DLL1/ANGPTL4/KLF11/SOX11/ST3GAL1/SNAI2/CYR61/GATA6/PTGFR/TFAP2D/NKX3-2/PPARGC1A/PHLDA3/GATA3/PDX1/RGCC/SOX9/TBX3/GLI2/NR4A2/ACVR1C/DLX1/NKX2-5/SFRP1/SMO/AR	26
MII_Mo	GO:0043067	regulation of programmed cell death	25/229	465/8043	0.00155546	0.0130862	0.00994262	DLL1/ANGPTL4/KLF11/ST3GAL1/SNAI2/CYR61/GATA6/PTGFR/TFAP2D/NKX3-2/PPARGC1A/PHLDA3/GATA3/PDX1/RGCC/SOX9/TBX3/GLI2/NR4A2/ACVR1C/DLX1/NKX2-5/SFRP1/SMO/AR	25
MII_Mo	GO:0090100	positive regulation of transmembrane receptor protein serine/threonine kinase signaling pathway	5/229	31/8043	0.00166135	0.0139265	0.0105811	GDF7/SOX11/CYR61/BMP3/BMP7	5
MII_Mo	GO:0009967	positive regulation of signal transduction	25/229	469/8043	0.00175071	0.0146228	0.0111101	DLL1/RSPO3/DLL4/NTRK3/IGF2/FGF19/GDF7/SOX11/IL6R/CYR61/LGR5/SALL1/PKD2/BMP3/LGR6/GATA3/SOX9/ADRA1A/FZD10/ADRA2A/GPR55/SFRP1/BMP7/SMO/AR	25
MII_Mo	GO:1905332	positive regulation of morphogenesis of an epithelium	4/229	19/8043	0.00177146	0.0147431	0.0112015	GATA3/SOX9/SMO/AR	4
MII_Mo	GO:0044070	regulation of anion transport	16/229	247/8043	0.00179058	0.0148344	0.0112709	LIPG/GALR1/NR4A3/PTGES/FGF19/SYT12/KCNA2/CHGA/LRAT/POU4F2/PDX1/ADRA2A/INHBB/ACVR1C/SFRP1/SMO	16
MII_Mo	GO:0003231	cardiac ventricle development	6/229	46/8043	0.0018016	0.0148344	0.0112709	DLL4/SOX11/CYR61/GATA3/TBX3/NKX2-5	6
MII_Mo	GO:0030278	regulation of ossification	6/229	46/8043	0.0018016	0.0148344	0.0112709	SIX2/SOX11/OSR2/CYR61/SOX9/SFRP1	6
MII_Mo	GO:0050709	negative regulation of protein secretion	5/229	32/8043	0.00192401	0.0157864	0.0119942	CHGA/ADRA2A/INHBB/ACVR1C/SFRP1	5
MII_Mo	GO:0001558	regulation of cell growth	9/229	99/8043	0.00196483	0.0160125	0.012166	IGFBPL1/SEMA6A/SOX17/KIAA1024/ISLR2/POU4F2/NTN1/SFRP1/TSPYL2	9
MII_Mo	GO:0071772	response to BMP	7/229	63/8043	0.00197225	0.0160125	0.012166	GDF7/SOX11/CYR61/SOX9/DLX1/SFRP1/BMP7	7
MII_Mo	GO:0071773	cellular response to BMP stimulus	7/229	63/8043	0.00197225	0.0160125	0.012166	GDF7/SOX11/CYR61/SOX9/DLX1/SFRP1/BMP7	7
MII_Mo	GO:0042692	muscle cell differentiation	11/229	140/8043	0.00210977	0.0170693	0.0129689	DLL1/IGF2/MYOD1/GATA6/NEBL/SOX9/ADRA1A/TBX3/ACTA1/NKX2-5/SMO	11
MII_Mo	GO:0030516	regulation of axon extension	4/229	20/8043	0.00216541	0.0174586	0.0132647	SEMA6A/ISLR2/POU4F2/NTN1	4
MII_Mo	GO:0008543	fibroblast growth factor receptor signaling pathway	5/229	33/8043	0.00221581	0.0178032	0.0135265	FGF19/FGF5/GATA3/FGF9/APLN	5
MII_Mo	GO:0002068	glandular epithelial cell development	3/229	10/8043	0.00235708	0.018553	0.0140962	DLL1/NKX2-2/SMO	3
MII_Mo	GO:0009713	catechol-containing compound biosynthetic process	3/229	10/8043	0.00235708	0.018553	0.0140962	HDC/GATA3/NR4A2	3
MII_Mo	GO:0021952	central nervous system projection neuron axonogenesis	3/229	10/8043	0.00235708	0.018553	0.0140962	CDH11/GLI2/NR4A2	3
MII_Mo	GO:0033280	response to vitamin D	3/229	10/8043	0.00235708	0.018553	0.0140962	SNAI2/SFRP1/CYP24A1	3
MII_Mo	GO:0035019	somatic stem cell population maintenance	3/229	10/8043	0.00235708	0.018553	0.0140962	SIX2/SOX9/SFRP1	3
MII_Mo	GO:0042423	catecholamine biosynthetic process	3/229	10/8043	0.00235708	0.018553	0.0140962	HDC/GATA3/NR4A2	3
MII_Mo	GO:0051270	regulation of cellular component movement	18/229	303/8043	0.00247267	0.0193971	0.0147375	DLL4/NR4A3/SEMA6A/SNAI2/CYR61/PHACTR1/POU4F2/FGF5/LGR6/GATA3/FGF9/RGCC/SOX9/NTN1/ADRA2A/ACVR1C/SFRP1/SMO	18
MII_Mo	GO:0022603	regulation of anatomical structure morphogenesis	17/229	279/8043	0.00249205	0.0194833	0.0148031	DLL1/SEMA6A/SIX2/CDC42EP1/GATA6/KIAA1024/ISLR2/POU4F2/VASH2/GATA3/RGCC/SOX9/NTN1/GATA2/SFRP1/SMO/AR	17
MII_Mo	GO:0046888	negative regulation of hormone secretion	5/229	34/8043	0.00253857	0.0197143	0.0149785	CHGA/ADRA2A/INHBB/ACVR1C/SFRP1	5
MII_Mo	GO:0048593	camera-type eye morphogenesis	5/229	34/8043	0.00253857	0.0197143	0.0149785	DLL1/SOX11/PROM1/PTF1A/SOX9	5
MII_Mo	GO:0001709	cell fate determination	4/229	21/8043	0.00261587	0.0199804	0.0151808	MYOD1/SOX17/GATA3/NKX2-2	4
MII_Mo	GO:0051937	catecholamine transport	4/229	21/8043	0.00261587	0.0199804	0.0151808	SYT12/KCNA2/SLC6A2/CHGA	4
MII_Mo	GO:0060042	retina morphogenesis in camera-type eye	4/229	21/8043	0.00261587	0.0199804	0.0151808	DLL1/PROM1/PTF1A/SOX9	4
MII_Mo	GO:0060512	prostate gland morphogenesis	4/229	21/8043	0.00261587	0.0199804	0.0151808	SOX9/GLI2/SFRP1/AR	4
MII_Mo	GO:0060740	prostate gland epithelium morphogenesis	4/229	21/8043	0.00261587	0.0199804	0.0151808	SOX9/GLI2/SFRP1/AR	4
MII_Mo	GO:0040008	regulation of growth	13/229	189/8043	0.00283133	0.0215552	0.0163773	DLL1/IGFBPL1/MYOD1/SEMA6A/SOX17/KIAA1024/ISLR2/POU4F2/NTN1/SFRP1/SMO/TSPYL2/AR	13
MII_Mo	GO:0007498	mesoderm development	5/229	35/8043	0.00289413	0.0218898	0.0166315	LHX2/SIX2/TAL1/TBX3/SMO	5
MII_Mo	GO:0060688	regulation of morphogenesis of a branching structure	5/229	35/8043	0.00289413	0.0218898	0.0166315	SIX2/SOX9/SFRP1/SMO/AR	5
MII_Mo	GO:0060070	canonical Wnt signaling pathway	8/229	86/8043	0.00300135	0.0226271	0.0171916	SOX17/SNAI2/LGR5/WNT4/GATA3/SOX9/FZD10/SFRP1	8
MII_Mo	GO:0022612	gland morphogenesis	6/229	51/8043	0.00307829	0.023132	0.0175753	GDF7/SOX9/TBX3/GLI2/SFRP1/AR	6
MII_Mo	GO:0003179	heart valve morphogenesis	4/229	22/8043	0.00312668	0.0232442	0.0176605	CYR61/GATA3/SOX9/GATA4	4
MII_Mo	GO:0007530	sex determination	4/229	22/8043	0.00312668	0.0232442	0.0176605	NR5A1/SOX9/AR/SOX3	4
MII_Mo	GO:0072089	stem cell proliferation	4/229	22/8043	0.00312668	0.0232442	0.0176605	SIX2/SOX11/SOX17/TBX3	4
MII_Mo	GO:0023061	signal release	12/229	169/8043	0.00314351	0.0232442	0.0176605	GALR1/PTGES/SYT12/SOX11/KCNA2/CHGA/PDX1/TBX3/ADRA2A/INHBB/ACVR1C/SFRP1	12
MII_Mo	GO:0003176	aortic valve development	3/229	11/8043	0.00317331	0.0232442	0.0176605	GATA3/SOX9/GATA4	3
MII_Mo	GO:0033273	response to vitamin	3/229	11/8043	0.00317331	0.0232442	0.0176605	SNAI2/SFRP1/CYP24A1	3
MII_Mo	GO:0042474	middle ear morphogenesis	3/229	11/8043	0.00317331	0.0232442	0.0176605	SIX2/OSR2/NKX3-2	3
MII_Mo	GO:0048854	brain morphogenesis	3/229	11/8043	0.00317331	0.0232442	0.0176605	OTX1/GDF7/SMO	3
MII_Mo	GO:0001892	embryonic placenta development	5/229	36/8043	0.00328435	0.023832	0.0181071	IGF2/CYR61/MDFI/PKD2/VASH2	5
MII_Mo	GO:0003151	outflow tract morphogenesis	5/229	36/8043	0.00328435	0.023832	0.0181071	SOX11/SOX17/GATA6/TBX3/NKX2-5	5
MII_Mo	GO:0042472	inner ear morphogenesis	5/229	36/8043	0.00328435	0.023832	0.0181071	POU4F3/OTX1/SOX9/GLI2/GBX2	5
MII_Mo	GO:0007517	muscle organ development	9/229	107/8043	0.00334591	0.0242032	0.0183891	DLL1/DLL4/MYOD1/PITX1/SOX11/DMRTA2/ACTA1/NKX2-5/SMO	9
MII_Mo	GO:2000145	regulation of cell motility	17/229	289/8043	0.00358572	0.0258573	0.0196459	DLL4/NR4A3/SEMA6A/SNAI2/CYR61/PHACTR1/FGF5/LGR6/GATA3/FGF9/RGCC/SOX9/NTN1/ADRA2A/ACVR1C/SFRP1/SMO	17
MII_Mo	GO:0030334	regulation of cell migration	16/229	265/8043	0.00362862	0.0260856	0.0198193	DLL4/NR4A3/SEMA6A/SNAI2/CYR61/PHACTR1/FGF5/LGR6/GATA3/FGF9/RGCC/SOX9/ADRA2A/ACVR1C/SFRP1/SMO	16
MII_Mo	GO:0015844	monoamine transport	4/229	23/8043	0.00370154	0.0262843	0.0199703	SYT12/KCNA2/SLC6A2/CHGA	4
MII_Mo	GO:0030901	midbrain development	4/229	23/8043	0.00370154	0.0262843	0.0199703	OTX1/GDF7/TFAP2D/SFRP1	4
MII_Mo	GO:0046530	photoreceptor cell differentiation	4/229	23/8043	0.00370154	0.0262843	0.0199703	PROM1/SOX9/CDHR1/DLX1	4
MII_Mo	GO:0061337	cardiac conduction	4/229	23/8043	0.00370154	0.0262843	0.0199703	KCND3/KCNE3/NKX2-5/KCNE5	4
MII_Mo	GO:0050680	negative regulation of epithelial cell proliferation	6/229	54/8043	0.00411337	0.0288015	0.0218828	DLL4/SNAI2/RGCC/SOX9/SFRP1/AR	6
MII_Mo	GO:0021696	cerebellar cortex morphogenesis	3/229	12/8043	0.00414285	0.0288015	0.0218828	DLL1/GLI2/SMO	3
MII_Mo	GO:0021955	central nervous system neuron axonogenesis	3/229	12/8043	0.00414285	0.0288015	0.0218828	CDH11/GLI2/NR4A2	3
MII_Mo	GO:0032924	activin receptor signaling pathway	3/229	12/8043	0.00414285	0.0288015	0.0218828	GDF7/INHBB/ACVR1C	3
MII_Mo	GO:0033687	osteoblast proliferation	3/229	12/8043	0.00414285	0.0288015	0.0218828	OSR2/CYR61/SFRP1	3
MII_Mo	GO:0090189	regulation of branching involved in ureteric bud morphogenesis	3/229	12/8043	0.00414285	0.0288015	0.0218828	SIX2/SOX9/SMO	3
MII_Mo	GO:1902895	positive regulation of pri-miRNA transcription by RNA polymerase II	3/229	12/8043	0.00414285	0.0288015	0.0218828	FOSL1/GATA2/APLN	3
MII_Mo	GO:0001658	branching involved in ureteric bud morphogenesis	4/229	24/8043	0.00434409	0.0297551	0.0226074	SIX2/PKD2/SOX9/SMO	4
MII_Mo	GO:0021954	central nervous system neuron development	4/229	24/8043	0.00434409	0.0297551	0.0226074	CDH11/GLI2/NR4A2/GBX2	4
MII_Mo	GO:0030850	prostate gland development	4/229	24/8043	0.00434409	0.0297551	0.0226074	SOX9/GLI2/SFRP1/AR	4
MII_Mo	GO:0042733	embryonic digit morphogenesis	4/229	24/8043	0.00434409	0.0297551	0.0226074	OSR2/SALL1/TBX3/GLI2	4
MII_Mo	GO:0061387	regulation of extent of cell growth	4/229	24/8043	0.00434409	0.0297551	0.0226074	SEMA6A/ISLR2/POU4F2/NTN1	4
MII_Mo	GO:0030111	regulation of Wnt signaling pathway	8/229	92/8043	0.00455307	0.0310948	0.0236252	RSPO3/SOX17/SNAI2/LGR5/SALL1/LGR6/SOX9/SFRP1	8
MII_Mo	GO:0002792	negative regulation of peptide secretion	5/229	39/8043	0.00468131	0.0317837	0.0241486	CHGA/ADRA2A/INHBB/ACVR1C/SFRP1	5
MII_Mo	GO:0030177	positive regulation of Wnt signaling pathway	5/229	39/8043	0.00468131	0.0317837	0.0241486	RSPO3/LGR5/SALL1/LGR6/SFRP1	5
MII_Mo	GO:0050796	regulation of insulin secretion	6/229	56/8043	0.00493346	0.0333979	0.0253751	CHGA/PDX1/ADRA2A/INHBB/ACVR1C/SFRP1	6
MII_Mo	GO:0003170	heart valve development	4/229	25/8043	0.00505783	0.0338452	0.0257149	CYR61/GATA3/SOX9/GATA4	4
MII_Mo	GO:0006940	regulation of smooth muscle contraction	4/229	25/8043	0.00505783	0.0338452	0.0257149	NMU/ADRA1A/KCNMA1/ADRA2A	4
MII_Mo	GO:0014013	regulation of gliogenesis	4/229	25/8043	0.00505783	0.0338452	0.0257149	SOX11/OLIG2/DLX1/NKX2-2	4
MII_Mo	GO:0032413	negative regulation of ion transmembrane transporter activity	4/229	25/8043	0.00505783	0.0338452	0.0257149	PKD2/KCNE3/ADRA2A/KCNE5	4
MII_Mo	GO:0045667	regulation of osteoblast differentiation	5/229	40/8043	0.00522851	0.034591	0.0262815	SOX11/SNAI2/CYR61/SOX9/SFRP1	5
MII_Mo	GO:0006775	fat-soluble vitamin metabolic process	3/229	13/8043	0.00527356	0.034591	0.0262815	SNAI2/LRAT/CYP24A1	3
MII_Mo	GO:0021695	cerebellar cortex development	3/229	13/8043	0.00527356	0.034591	0.0262815	DLL1/GLI2/SMO	3
MII_Mo	GO:0030238	male sex determination	3/229	13/8043	0.00527356	0.034591	0.0262815	NR5A1/SOX9/AR	3
MII_Mo	GO:0051148	negative regulation of muscle cell differentiation	3/229	13/8043	0.00527356	0.034591	0.0262815	DLL1/IGF2/NKX2-5	3
MII_Mo	GO:0061383	trabecula morphogenesis	3/229	13/8043	0.00527356	0.034591	0.0262815	DLL4/CHAD/SFRP1	3
MII_Mo	GO:0071880	adenylate cyclase-activating adrenergic receptor signaling pathway	3/229	13/8043	0.00527356	0.034591	0.0262815	CHGA/ADRA1A/ADRA2A	3
MII_Mo	GO:0001837	epithelial to mesenchymal transition	6/229	57/8043	0.00538579	0.0350091	0.0265992	SNAI2/RGCC/SOX9/TBX3/SFRP1/FOXA2	6
MII_Mo	GO:0032412	regulation of ion transmembrane transporter activity	6/229	57/8043	0.00538579	0.0350091	0.0265992	RASGRF1/PKD2/KCNE3/FGF14/ADRA2A/KCNE5	6
MII_Mo	GO:0042327	positive regulation of phosphorylation	17/229	301/8043	0.00539508	0.0350091	0.0265992	NTRK3/IGF2/FGF19/GDF7/IL6R/CYR61/PKD2/BMP3/FGF5/FGF9/RGCC/SOX9/ADRA1A/FZD10/ADRA2A/BMP7/AR	17
MII_Mo	GO:0046879	hormone secretion	9/229	115/8043	0.00539761	0.0350091	0.0265992	GALR1/SOX11/CHGA/PDX1/TBX3/ADRA2A/INHBB/ACVR1C/SFRP1	9
MII_Mo	GO:0010562	positive regulation of phosphorus metabolic process	18/229	327/8043	0.00552654	0.0356462	0.0270833	NTRK3/IGF2/FGF19/GDF7/IL6R/CYR61/PPARGC1A/PKD2/BMP3/FGF5/FGF9/RGCC/SOX9/ADRA1A/FZD10/ADRA2A/BMP7/AR	18
MII_Mo	GO:0045937	positive regulation of phosphate metabolic process	18/229	327/8043	0.00552654	0.0356462	0.0270833	NTRK3/IGF2/FGF19/GDF7/IL6R/CYR61/PPARGC1A/PKD2/BMP3/FGF5/FGF9/RGCC/SOX9/ADRA1A/FZD10/ADRA2A/BMP7/AR	18
MII_Mo	GO:2001257	regulation of cation channel activity	5/229	41/8043	0.00581949	0.0371252	0.028207	RASGRF1/PKD2/KCNE3/FGF14/KCNE5	5
MII_Mo	GO:0002067	glandular epithelial cell differentiation	4/229	26/8043	0.00584614	0.0371252	0.028207	DLL1/PDX1/NKX2-2/SMO	4
MII_Mo	GO:0032410	negative regulation of transporter activity	4/229	26/8043	0.00584614	0.0371252	0.028207	PKD2/KCNE3/ADRA2A/KCNE5	4
MII_Mo	GO:0060021	roof of mouth development	4/229	26/8043	0.00584614	0.0371252	0.028207	FOXE1/SOX11/OSR2/TBX3	4
MII_Mo	GO:0001890	placenta development	6/229	58/8043	0.00586777	0.0371252	0.028207	IGF2/FOSL1/CYR61/MDFI/PKD2/VASH2	6
MII_Mo	GO:0022898	regulation of transmembrane transporter activity	6/229	58/8043	0.00586777	0.0371252	0.028207	RASGRF1/PKD2/KCNE3/FGF14/ADRA2A/KCNE5	6
MII_Mo	GO:0048738	cardiac muscle tissue development	6/229	58/8043	0.00586777	0.0371252	0.028207	DLL1/DLL4/NEBL/ADRA1A/TBX3/NKX2-5	6
MII_Mo	GO:0002064	epithelial cell development	7/229	77/8043	0.00613188	0.038586	0.0293169	DLL1/SLC9A4/NKX3-2/SOX9/NKX2-2/SMO/AR	7
MII_Mo	GO:0090092	regulation of transmembrane receptor protein serine/threonine kinase signaling pathway	7/229	77/8043	0.00613188	0.038586	0.0293169	GDF7/SOX11/CYR61/BMP3/DLX1/SFRP1/BMP7	7
MII_Mo	GO:0043270	positive regulation of ion transport	12/229	184/8043	0.00621009	0.0389725	0.0296106	LIPG/GALR1/NR4A3/PTGES/FGF19/LRAT/POU4F2/PKD2/PDX1/ADRA2A/SMO/KCNE5	12
MII_Mo	GO:0032409	regulation of transporter activity	6/229	59/8043	0.00638049	0.0399339	0.030341	RASGRF1/PKD2/KCNE3/FGF14/ADRA2A/KCNE5	6
MII_Mo	GO:0007369	gastrulation	5/229	42/8043	0.00645602	0.0400545	0.0304326	SIX2/SOX17/TAL1/SFRP1/APLN	5
MII_Mo	GO:0030879	mammary gland development	5/229	42/8043	0.00645602	0.0400545	0.0304326	SOX9/TBX3/GLI2/SMO/AR	5
MII_Mo	GO:0045445	myoblast differentiation	5/229	42/8043	0.00645602	0.0400545	0.0304326	DLL1/MYOD1/PITX1/SOX9/TBX3	5
MII_Mo	GO:0021587	cerebellum morphogenesis	3/229	14/8043	0.00657224	0.0400545	0.0304326	DLL1/GLI2/SMO	3
MII_Mo	GO:0031069	hair follicle morphogenesis	3/229	14/8043	0.00657224	0.0400545	0.0304326	FOXE1/GLI2/SMO	3
MII_Mo	GO:0048730	epidermis morphogenesis	3/229	14/8043	0.00657224	0.0400545	0.0304326	FOXE1/GLI2/SMO	3
MII_Mo	GO:0048745	smooth muscle tissue development	3/229	14/8043	0.00657224	0.0400545	0.0304326	PKD2/SOX9/SMO	3
MII_Mo	GO:0072091	regulation of stem cell proliferation	3/229	14/8043	0.00657224	0.0400545	0.0304326	SOX11/SOX17/TBX3	3
MII_Mo	GO:0097009	energy homeostasis	3/229	14/8043	0.00657224	0.0400545	0.0304326	DLL1/PPARGC1A/NMU	3
MII_Mo	GO:1905314	semi-lunar valve development	3/229	14/8043	0.00657224	0.0400545	0.0304326	GATA3/SOX9/GATA4	3
MII_Mo	GO:0048638	regulation of developmental growth	8/229	98/8043	0.00665869	0.0404751	0.0307522	DLL1/MYOD1/SEMA6A/ISLR2/POU4F2/NTN1/SMO/AR	8
MII_Mo	GO:0007178	transmembrane receptor protein serine/threonine kinase signaling pathway	9/229	119/8043	0.00673435	0.0407218	0.0309396	GDF7/SOX11/CYR61/BMP3/INHBB/ACVR1C/DLX1/SFRP1/BMP7	9
MII_Mo	GO:0009914	hormone transport	9/229	119/8043	0.00673435	0.0407218	0.0309396	GALR1/SOX11/CHGA/PDX1/TBX3/ADRA2A/INHBB/ACVR1C/SFRP1	9
MII_Mo	GO:0030509	BMP signaling pathway	6/229	60/8043	0.00692503	0.041766	0.031733	GDF7/SOX11/CYR61/DLX1/SFRP1/BMP7	6
MII_Mo	GO:0043271	negative regulation of ion transport	8/229	99/8043	0.00707134	0.042428	0.032236	CHGA/PKD2/KCNE3/ADRA2A/INHBB/ACVR1C/SFRP1/KCNE5	8
MII_Mo	GO:0046883	regulation of hormone secretion	8/229	99/8043	0.00707134	0.042428	0.032236	GALR1/SOX11/CHGA/PDX1/ADRA2A/INHBB/ACVR1C/SFRP1	8
MII_Mo	GO:0048592	eye morphogenesis	5/229	43/8043	0.00713987	0.0425097	0.032298	DLL1/SOX11/PROM1/PTF1A/SOX9	5
MII_Mo	GO:0051224	negative regulation of protein transport	5/229	43/8043	0.00713987	0.0425097	0.032298	CHGA/ADRA2A/INHBB/ACVR1C/SFRP1	5
MII_Mo	GO:1904950	negative regulation of establishment of protein localization	5/229	43/8043	0.00713987	0.0425097	0.032298	CHGA/ADRA2A/INHBB/ACVR1C/SFRP1	5
MII_Mo	GO:0030510	regulation of BMP signaling pathway	4/229	28/8043	0.00765929	0.0454856	0.0345591	SOX11/CYR61/DLX1/SFRP1	4
MII_Mo	GO:0048534	hematopoietic or lymphoid organ development	17/229	313/8043	0.00789109	0.0462107	0.03511	DLL1/DLL4/FOXE1/ST3GAL1/LY9/IL6R/TAL1/PSMB11/NKX3-2/POU4F2/GATA3/FLT3/GATA2/GPR55/NKX2-5/SFRP1/HOXA3	17
MII_Mo	GO:0006935	chemotaxis	14/229	238/8043	0.00794455	0.0462107	0.03511	LHX2/SEMA6A/POU4F3/DPYSL5/GDF7/CHGA/POU4F2/PIK3CG/NTN1/DPYSL4/GLI2/GBX2/SMO/EVX1	14
MII_Mo	GO:0007169	transmembrane receptor protein tyrosine kinase signaling pathway	13/229	214/8043	0.00802284	0.0462107	0.03511	DLL1/NTRK3/NR4A3/IGF2/FGF19/FGF5/GATA3/FGF9/FLT3/SOX9/ADRA2A/AR/APLN	13
MII_Mo	GO:0044092	negative regulation of molecular function	15/229	263/8043	0.00802706	0.0462107	0.03511	GALR1/LHX2/KEAP1/ANGPTL4/SOX11/SERPINB9/PKD2/KCNE3/FZD10/ADRA2A/SFRP1/FOXA2/ID1/SMO/KCNE5	15
MII_Mo	GO:0001755	neural crest cell migration	3/229	15/8043	0.00804473	0.0462107	0.03511	SEMA6A/GBX2/SMO	3
MII_Mo	GO:0007584	response to nutrient	3/229	15/8043	0.00804473	0.0462107	0.03511	SNAI2/SFRP1/CYP24A1	3
MII_Mo	GO:0015872	dopamine transport	3/229	15/8043	0.00804473	0.0462107	0.03511	SYT12/KCNA2/SLC6A2	3
MII_Mo	GO:0021575	hindbrain morphogenesis	3/229	15/8043	0.00804473	0.0462107	0.03511	DLL1/GLI2/SMO	3
MII_Mo	GO:0043392	negative regulation of DNA binding	3/229	15/8043	0.00804473	0.0462107	0.03511	LHX2/SOX11/SMO	3
MII_Mo	GO:0045662	negative regulation of myoblast differentiation	3/229	15/8043	0.00804473	0.0462107	0.03511	DLL1/SOX9/TBX3	3
MII_Mo	GO:0050772	positive regulation of axonogenesis	3/229	15/8043	0.00804473	0.0462107	0.03511	ISLR2/POU4F2/NTN1	3
MII_Mo	GO:0071875	adrenergic receptor signaling pathway	3/229	15/8043	0.00804473	0.0462107	0.03511	CHGA/ADRA1A/ADRA2A	3
MII_Mo	GO:0085029	extracellular matrix assembly	3/229	15/8043	0.00804473	0.0462107	0.03511	ANTXR1/RGCC/SOX9	3
MII_Mo	GO:0090287	regulation of cellular response to growth factor stimulus	7/229	81/8043	0.00806001	0.0462107	0.03511	DLL1/SOX11/CYR61/GATA3/DLX1/SFRP1/APLN	7
MII_Mo	GO:0048639	positive regulation of developmental growth	6/229	62/8043	0.00811393	0.0464053	0.0352578	DLL1/MYOD1/ISLR2/POU4F2/NTN1/SMO	6
MII_Mo	GO:0042330	taxis	14/229	240/8043	0.00852482	0.0486354	0.0369523	LHX2/SEMA6A/POU4F3/DPYSL5/GDF7/CHGA/POU4F2/PIK3CG/NTN1/DPYSL4/GLI2/GBX2/SMO/EVX1	14
MII_Mo	GO:0061180	mammary gland epithelium development	4/229	29/8043	0.00869019	0.0492161	0.0373935	TBX3/GLI2/SMO/AR	4
MII_Mo	GO:0090288	negative regulation of cellular response to growth factor stimulus	4/229	29/8043	0.00869019	0.0492161	0.0373935	GATA3/DLX1/SFRP1/APLN	4
MII_Mo	GO:1904063	negative regulation of cation transmembrane transport	4/229	29/8043	0.00869019	0.0492161	0.0373935	PKD2/KCNE3/ADRA2A/KCNE5	4
MII_Mo	GO:0003015	heart process	6/229	63/8043	0.00876042	0.0494932	0.037604	KCND3/CHGA/KCNE3/ADRA1A/NKX2-5/KCNE5	6
