# Supplementary material for: Coordination of zygotic genome activation entry and exit by H3K4me3 and H3K27me3 in porcine early embryos
Source: HighWire-hosted journal article supplement (doi:10.1101/gr.276207.121), 2022-07-22
Supplement: Supplemental_Table_S4.xlsx [file Supplemental_Table_S4.xlsx]

## Sheet: Mouse ZGA genes
Supplemental Table S4. Gene list of porcine, mouse, and human ZGA genes and their transcriptional levels in oocytes and early embryos
Gene	MII_fpkm	1C_fpkm	2C_early_fpkm	2C_late_fpkm	4C_fpkm	8C_fpkm	ICM_fpkm
43531	77.4842	8.8399	3.4641	17.4739	38.7867	44.0812	63.1215
43718	0.119402	0.178327	0.467883	9.40499	5.64386	5.06586	2.66507
0610009B22Rik	6.41018	116.059	70.7042	18.0381	13.4431	34.9633	42.2071
0610009L18Rik	1.48733	1.49447	3.11232	5.27228	0	0.275846	1.95434
0610010K14Rik	14.8885	55.6342	41.3896	39.7806	61.204	127.469	146.922
0610012G03Rik	3.3549	2.89644	16.1555	49.8083	46.951	44.4865	8.21306
0610040F04Rik	6.14395	14.1375	14.7414	17.2553	1.84365	0.120427	0.271701
0610040J01Rik	4.85921	10.754	14.1456	27.066	1.43249	1.37673	0.326966
1110004F10Rik	7.68887	9.00446	8.17501	18.7293	23.6924	70.851	165.963
1110006O24Rik	0.639019	0.290608	1.06015	10.8118	4.62349	0.46735	1.21909
1110008F13Rik	0.461376	1.79679	25.0249	22.7479	11.902	8.5457	8.73667
1110008L16Rik	1.48843	7.41032	8.85131	14.6447	15.1656	14.8029	8.90749
1110008P14Rik	2.83246	9.53478	15.1432	33.8537	41.1708	64.6909	49.1852
1110020A21Rik	1.30137	9.09402	4.08471	8.73484	3.97348	0.882932	0.70593
1110038B12Rik	0.413358	2.14366	6.57091	18.5797	48.4187	100.069	121.948
1110038F14Rik	4.41692	11.4148	8.54083	69.5271	105.613	65.0277	36.2664
1110059E24Rik	11.0884	35.1323	38.2132	29.5872	11.8507	27.2506	41.0928
1110059G10Rik	30.797	13.7259	3.98451	9.28195	12.5116	10.4676	4.15683
1200014J11Rik	3.78359	5.89827	3.29501	11.445	21.3245	6.94567	4.07585
1500011K16Rik	0.352338	0.799757	2.5934	6.95197	1.01591	2.99789	20.848
1500012F01Rik	0.409183	4.96957	4.15443	17.1129	37.0213	53.4899	52.6658
1600002H07Rik	6.70711	9.12258	7.93265	20.3122	24.445	7.93396	12.1433
1600002K03Rik	0.169393	0.387936	0.235747	50.5507	97.0295	55.2125	15.5485
1600010M07Rik	0	0	0.0872715	15.5789	24.1655	31.7482	6.62556
1600012H06Rik	0.26669	0.215266	0.882969	23.5663	37.0853	11.2203	7.4025
1600015I10Rik	0	0.0620723	2.02552	11.6255	8.22869	0.573209	0.0781122
1600020E01Rik	0.208794	0.481419	1.266	16.6336	17.4771	15.4602	10.061
1600025M17Rik	0	0	0.111379	154.189	206.689	13.7274	0.726828
1700003E24Rik	0	2.45245	6.20003	51.3363	84.084	32.0678	3.78425
1700003E24Rik	0	2.45245	6.20003	51.3363	84.084	32.0678	3.78425
1700008J07Rik	0.910029	0.953815	1.32746	6.03062	3.35636	0.971986	2.86116
1700010D01Rik	0.286796	0.33493	6.60406	27.238	13.8628	3.45836	0
1700013H16Rik	0	0.0734463	0.774064	37.092	13.2338	0.704237	0.373175
1700017B05Rik	5.34934	9.00624	7.9239	15.0971	38.1505	2.80799	7.62173
1700018B24Rik	3.67771	13.2331	11.9811	9.94758	1.54873	1.96656	0.0554459
1700020I14Rik	0.789462	4.4469	6.20576	20.7653	18.4172	26.9865	31.4494
1700021F05Rik	1.70676	4.09013	3.08556	52.7699	118.499	255.088	40.6988
1700025F22Rik	0	0	3.1664	7.55694	6.33816	0	0
1700029F12Rik	2.93353	6.90338	9.3228	8.78652	1.23405	0.272176	0.062858
1700034H15Rik	0.0150998	0.0500409	0.0540927	5.99984	9.54156	1.54903	0.0732363
1700037H04Rik	11.5416	11.9714	9.69066	23.4675	17.73	8.11252	13.7367
1700042G15Rik	0	0.0805699	0.564046	5.84355	11.8107	3.00037	1.31781
1700069L16Rik	0.147639	0.505278	0.341299	10.933	7.31466	0.325619	0.218462
1700084E18Rik	0	0	0.395936	10.6596	0.321179	2.22526	1.31995
1700084M14Rik	0	0.265051	0.107116	7.37406	1.1971	1.19962	0
1700086L19Rik	0	0	4.45814	5.80058	0	0	0
1700093K21Rik	1.28216	2.89292	2.38141	9.09721	2.15062	0.123927	0.0617576
1700096K18Rik	0.262975	0	1.22054	5.20698	1.81513	3.73156	2.65382
1700123O20Rik	0.280172	0.59672	1.21082	22.73	21.7529	16.3377	27.8316
1810009A15Rik	15.8544	25.386	53.449	128.098	161.49	225.486	298.908
1810013L24Rik	7.98179	14.2823	14.3228	26.1791	15.8447	8.4859	3.67215
1810032O08Rik	0.319264	0.481093	1.41551	6.16052	11.341	14.0162	17.7974
1810043H04Rik	7.18255	14.0076	14.4981	58.4878	93.6526	103.876	94.495
1810044D09Rik	0.311281	3.64924	2.63721	12.7041	20.0598	27.2728	19.5728
1810055G02Rik	10.3723	24.9878	22.9336	39.4267	40.9025	6.77652	16.1689
1810058I24Rik	13.6645	21.1581	35.7989	36.199	22.4241	20.2517	48.12
2010005H15Rik	0.770771	2.09019	1.56584	10.4294	2.50855	0	0.591393
2010107E04Rik	55.7062	154.585	173.43	376.676	777.363	1539.69	2378.11
2010320M18Rik	0.134288	0.76423	1.92052	22.667	26.6839	12.6914	10.0781
2210011C24Rik	0.197858	0	0.816627	7.06659	4.74608	6.96341	0.0716964
2210016F16Rik	0.216495	1.02119	1.49241	18.1478	34.4353	31.4456	28.0854
2210016L21Rik	0.236774	0.0665207	0.0808933	28.73	78.6386	87.1174	27.8131
2210019I11Rik	2.75159	8.25692	10.6108	5.7052	0.689553	0.0379251	0.0376103
2210409E12Rik	1.31667	4.82845	8.96828	404.951	511.162	742.695	1738.22
2310011J03Rik	1.20195	2.79461	1.63854	19.1967	31.8586	23.9713	13.1481
2310035C23Rik	7.36677	8.56923	5.6886	14.2509	8.83347	6.81299	5.80438
2310036O22Rik	5.47568	24.6755	29.324	107.379	176.944	293.456	68.1219
2310040G24Rik	0	0.793625	7.3344	88.0774	100.048	155.487	1.41332
2310045N01Rik	10.4587	15.8936	15.348	22.0937	28.7738	39.9876	48.0504
2310047M10Rik	0.161206	0.0902931	0.329409	8.03507	30.0428	3.65603	1.11129
2310057M21Rik	11.3672	19.923	2.893	18.6226	23.5874	11.9372	12.9381
2410002F23Rik	1.72847	1.81393	2.20588	14.7146	25.2144	34.2439	21.2933
2410004B18Rik	14.8769	14.3883	22.1054	78.0273	77.0161	57.7016	40.8353
2410004N09Rik	1.2661	3.0156	5.18129	14.6048	43.7001	39.9996	40.0578
2410006H16Rik	38.4056	31.055	18.7831	69.9445	116.602	209.596	292.664
2410015M20Rik	1.70807	6.87576	2.42344	46.8347	44.2617	125.778	147.986
2410016O06Rik	0	0	0.0805811	6.85638	8.52847	3.20783	1.93961
2410021H03Rik	1.29434	2.79678	3.90804	6.71396	2.81113	0.852335	2.37596
2500002B13Rik	205.644	623.136	627.156	456.247	208.174	57.9888	155.73
2510002D24Rik	0	0	0	8.77467	21.6583	21.1304	19.143
2510003E04Rik	1.70292	2.52783	5.92039	5.08419	7.56296	3.04094	0.216005
2610002J02Rik	1.82061	4.30299	6.25886	8.26935	9.44792	12.4827	10.8141
2610206C17Rik	0	0.0478584	1.88178	7.20887	0.0299731	0.0915723	0
2610318N02Rik	0	0	0.427121	8.7777	9.0961	1.61608	4.32457
2610524H06Rik	10.4355	28.0127	40.7665	20.9127	19.1747	14.7164	17.7158
2700038G22Rik	0.632067	0.193661	1.36072	19.9572	40.6683	18.551	6.71076
2700094K13Rik	6.97603	13.0826	14.1906	36.042	10.7752	63.4962	641.505
2700097O09Rik	1.27233	6.50251	2.10004	9.80575	12.8513	28.8246	27.9062
2810001G20Rik	1.19884	0.79132	1.4205	5.81866	3.86423	3.33564	2.24541
2810004N23Rik	2.67971	3.00971	4.60041	28.5177	41.4906	45.6095	58.3812
2810006K23Rik	0.607678	1.12202	2.62399	6.52988	0.853224	2.08121	4.94736
2810008D09Rik	0	0	2.38952	29.8231	61.0531	21.9382	14.1325
2810013P06Rik	1.29706	1.56942	1.46321	18.3713	22.0598	5.25116	2.17638
2810025M15Rik	5.3968	5.20027	13.34	11.0968	14.5203	28.3708	69.2595
2810428I15Rik	1.16631	8.39061	2.24058	14.6508	30.084	42.2727	104.208
2810429I04Rik	0.62214	2.39021	2.61109	6.12169	1.53927	1.54518	3.71239
2900076A07Rik	0	0.245339	0.59668	7.42107	2.41103	1.96884	0.315074
2900097C17Rik	1.22382	1.30602	1.54363	12.3252	34.5802	47.1466	12.7774
3110002H16Rik	18.1383	12.5841	5.30139	36.5339	73.2148	163.839	60.3015
3110045C21Rik	1.0827	2.76396	5.70072	6.45448	1.8941	0.312004	1.60333
3110056K07Rik	0.0926069	0.160277	0.422295	10.9545	17.1821	3.09792	0.965394
4632427E13Rik	0	0.36894	0.523229	10.7093	5.90415	7.02125	8.28082
4921531C22Rik	0.452741	0.844916	1.60972	10.182	3.99151	0.350106	0.506288
4921531P14Rik	3.4258	8.58482	13.3504	7.38346	0	0	0.202524
4930427A07Rik	0.178825	0.488004	0.791274	10.2272	11.0145	14.4501	10.1688
4930430J02Rik	0	0	0	6.50266	18.4771	0.872634	0.301033
4930432K21Rik	7.69976	8.87249	5.97128	23.4299	58.3984	39.6437	0.272137
4930453N24Rik	26.9115	58.768	93.8025	172.261	222.061	73.1066	77.3464
4930500L23Rik	0.940019	0.76423	1.17709	10.4158	17.2861	18.9878	0
4930547E08Rik	0	0	0.228195	9.36366	0.365003	0	0
4930548H24Rik	0.482529	3.91263	2.56201	20.7349	1.9643	0.422768	2.24899
4930558C23Rik	0.963394	7.36661	11.3715	7.15397	1.39896	0.908261	2.73791
4930579G24Rik	0.0725776	0.284368	2.99705	11.7478	2.21087	1.47594	15.4456
4933404O12Rik	0.0165473	0.0184629	0.202073	6.0041	2.18651	0.0822183	0.162189
4933406J08Rik	0	0.0374353	0.758737	16.4956	11.5662	11.1162	0.849151
4933408N05Rik	4.81169	9.36429	13.4142	10.1939	3.05085	1.65415	0.702428
4933411G11Rik	0.163069	0.218924	1.29417	25.5923	1.55103	0.418474	0
4933426M11Rik	3.30799	0.518724	0.66002	9.03055	29.1501	13.3097	5.36573
4933430M04Rik	0	0	0.435631	7.79004	0	0	0
4933432K03Rik	5.57944	25.2285	36.8524	18.6561	0.147571	0	0
4933434E20Rik	3.01581	8.20583	10.6055	23.9854	19.6662	25.4555	18.5347
5430416N02Rik	0	1.67118	2.11505	9.43533	8.31579	12.8182	44.3586
5730408K05Rik	0	0	2.90148	28.1216	63.5081	48.2975	22.4874
6030468B19Rik	0	0	0	6.82763	11.7162	0.726038	0
8430426J06Rik	3.43885	14.2557	11.557	10.8213	3.96185	1.70636	0.0835908
9130023H24Rik	2.22971	7.77615	8.78695	6.98541	3.10497	0.631194	0.581331
9130401M01Rik	1.79854	3.84072	3.00445	16.1322	31.8992	39.4115	29.3606
9430016H08Rik	0.883605	0.397174	0.348825	10.2225	36.1138	54.2547	49.1871
9430038I01Rik	57.1588	21.8455	17.7157	87.7099	68.6816	34.0561	25.4645
9630033F20Rik	3.83887	6.94194	4.70229	32.5828	49.1027	65.2505	15.6985
9930012K11Rik	0.647791	3.09931	1.7047	10.1193	3.49932	0.17974	0.152123
9930104L06Rik	0.688975	0.461736	0.447129	7.83608	6.9313	4.70281	2.75674
A430005L14Rik	13.0764	39.693	25.1702	48.341	147.366	124.009	72.6292
A530032D15Rik	0.940473	1.36095	1.97925	18.5332	18.9294	3.37431	0.171055
A630001G21Rik	0	0	0.201598	7.25066	2.7744	4.54397	0.365913
A630066F11Rik	0.379916	0.855964	1.66938	6.60938	2.01467	0.409578	3.43536
A830080D01Rik	0.0989919	0.574661	0.16127	10.8798	12.1465	7.27173	24.1946
A930015D03Rik	0.359979	1.83927	0.635083	17.265	10.7497	0.175144	2.60327
AA414768	0	0	0.0803235	5.75211	2.54479	0.568809	3.1923
AA415398	6.43778	7.42079	6.80686	52.5275	19.6881	0.108131	0.0534956
AA465934	1.7691	0.716038	0.555457	12.4307	2.72014	0.444794	1.40227
AA467197	0	0	0.730112	14.4683	10.0194	146.05	983.872
AA543401	0	0	0.201623	44.292	22.3804	0.726601	0.270635
Aacs	0.654862	0.495351	0.478087	12.3648	30.0843	74.1639	4.41561
Aaed1	0.268428	0	2.62192	10.8172	5.01234	10.8477	10.3336
Aamdc	2.06703	3.13763	3.5996	19.983	22.7441	37.7349	9.32594
Aars	4.03605	6.96465	4.32329	29.6149	36.8023	31.454	71.0764
Aatf	2.86521	7.88859	5.05768	17.8587	50.0632	79.4115	51.0884
Abcc5	2.34388	2.55742	2.02755	8.90014	9.75154	15.3962	9.32087
Abce1	4.83983	8.50622	6.27853	17.0602	84.3434	94.4706	111.061
Abcf1	17.5787	16.1893	8.42926	37.2456	99.0023	99.2121	57.1793
Abhd14b	0	0	0.0936068	21.7057	4.16469	0.442234	0.146155
Abhd17c	5.37898	4.1276	4.3956	9.32036	4.02251	2.58506	5.83752
Abhd6	43.2801	22.3761	13.5335	135.057	254.62	105.277	3.63203
Abt1	0.33617	2.35576	2.90778	27.6461	49.7811	26.6493	14.0028
Acat2	1.07455	4.29455	4.08775	14.2959	19.7501	16.682	25.2909
Acbd7	10.2345	8.11338	14.8718	27.5485	8.11175	1.31107	0.955853
Acer2	0.248795	0.231915	0.924644	18.1106	25.5232	65.6153	31.7168
Acot13	2.77873	36.6732	12.1465	96.3747	120.175	53.4883	47.1275
Acot8	2.90428	8.61418	5.75496	21.2418	67.1201	55.095	27.6893
Acox1	5.29655	5.56091	6.20831	13.6424	9.24854	2.93635	10.1049
Acsl4	3.94115	5.01118	3.78085	12.5499	52.7381	96.1428	5.55973
Actb	22.2541	60.4231	49.5136	71.0424	154.045	691.818	3205.65
Actg1	10.0857	49.0672	28.2613	28.897	27.6958	128.905	948.74
Actl6a	22.2632	66.2306	48.7596	47.825	107.054	93.5278	124.436
Actr3	18.3244	37.2724	43.7421	38.2362	13.7854	20.2303	54.4066
Actr6	5.3911	5.26869	3.64441	20.2991	73.1292	28.6723	17.7681
Acyp1	0.341635	1.36953	0.951116	31.6786	26.0872	25.9111	24.1056
Adat3	0.271904	0.0610627	0.272273	7.42431	19.6226	9.29932	10.6552
Adck4	0.577151	2.36735	2.82073	10.1767	11.9725	11.598	10.9914
Adi1	1.10005	1.13441	1.49949	48.5463	66.7228	36.5901	86.1956
Adipor1	9.75041	4.38491	8.78369	19.5489	31.3224	23.0086	48.9964
Adnp	0.0659963	0.029438	0.149164	5.07795	11.2776	9.64151	4.56796
Adora2b	0.392111	0.790505	0.801094	7.13585	1.20943	0.112002	2.24459
Adprhl2	0.226214	1.20699	1.31327	18.0825	58.8536	45.0961	18.8003
Adprm	2.28198	4.89397	1.9838	6.26118	5.10404	1.12604	2.98886
Adrbk1	0.729455	0.110044	0.267648	8.70886	15.8811	8.49446	3.48282
Adrm1	6.20832	10.4552	6.84426	19.4267	47.5866	85.0357	44.5818
Adsl	1.37026	1.7278	0.684285	22.5743	30.5594	29.1378	25.8529
Aen	10.1259	8.13888	6.34875	15.7979	28.8465	37.0824	15.1108
AF067063	1.42675	7.03674	45.9642	921.546	407.365	41.1501	0.887417
Aff1	9.69043	10.1936	8.82457	22.1618	26.783	14.922	8.68648
Aff4	0.468512	0.535576	0.495442	6.20971	7.13385	3.35571	3.57984
Agfg1	0.969765	4.40727	5.04331	7.60836	1.76344	2.32617	3.10637
Agfg2	8.22503	4.93251	2.87826	15.9406	6.03102	10.5079	2.4156
Aggf1	1.10954	1.14705	1.23682	8.70345	12.7068	6.81817	2.86737
Agmat	0	0	0.0249093	9.04662	8.63996	5.96445	0.233548
Agpat2	3.18034	11.2333	6.71154	21.1825	54.4962	172.903	144.532
Agpat5	4.45659	3.20656	2.08983	24.6586	32.2097	45.117	6.62349
Agpat9	0.14126	0.315594	1.05542	29.0657	89.6582	151.817	34.7748
Agrp	0	0	0.288908	5.98652	2.17627	7.4259	0
Agtrap	1.53089	3.0345	1.70884	5.38548	9.53585	7.69268	42.6296
Ahctf1	27.1778	16.9406	17.9476	44.6727	69.822	26.6425	20.8809
Ahcyl1	2.52233	2.55698	3.4576	5.91669	3.73503	1.50535	2.04773
AI413582	8.98867	7.27402	12.6041	41.4234	17.1111	8.74156	6.72526
AI464131	0	0.174857	0.921447	8.1004	17.9366	5.98409	1.45893
Aifm1	10.9277	17.0868	8.17423	23.9852	34.1507	42.1768	31.6035
Aimp2	8.24363	47.5478	27.5013	141.275	314.339	177.851	92.2251
Aip	2.72162	9.22631	6.97452	28.0585	41.9477	17.1641	8.67622
Ajuba	0	0.0846257	0.600322	12.7973	11.3126	8.80426	14.2481
AK010878	0.489063	2.13724	3.80902	77.5307	92.9168	30.4167	16.2834
Ak6	5.52824	3.07537	5.74717	93.7238	165.794	124.991	89.5841
Akap8	0.60807	4.8501	2.76299	30.5486	45.0377	51.8101	50.8375
Akap8l	4.97453	5.47119	1.41133	15.5233	11.4359	16.3237	19.0562
Akirin1	1.75721	0.785928	3.92699	24.6528	37.4632	85.6346	28.9671
Akr1b10	0	0.0651763	5.09896	17.0588	3.43852	0.0416325	0.764398
Akr7a5	2.28877	3.52181	2.26375	8.89813	17.6156	10.2546	36.9408
Akt2	3.7068	4.79745	5.48399	9.97321	7.20887	4.95861	25.6898
Alas1	16.4353	19.4312	6.88195	25.0554	42.0507	21.8211	19.9613
Aldh6a1	2.33234	16.4686	15.5978	13.4475	10.2018	2.70504	22.9065
Alg3	2.47061	6.96482	5.47535	6.21724	18.7133	25.1227	41.3949
Alkbh1	6.7618	5.26621	4.94329	18.328	13.7906	14.5491	19.1193
Alkbh3	0.907235	1.53075	1.95013	6.3562	7.68569	19.5225	15.4454
Alkbh4	0.256952	1.39183	1.70229	18.6307	7.27422	11.9995	12.9427
Alox12	1.0598	3.02215	3.52717	14.3134	6.47447	6.63683	1.99406
Alox5	0.0480152	0.0536406	0.500108	5.01348	0.669593	0.529313	0
Alpl	4.33535	6.8875	4.63907	8.95135	19.8712	13.8094	139.885
Alppl2	0.835948	4.71424	4.81532	406.56	1194.29	3143.24	4.03122
Als2	3.04469	3.84425	4.11854	45.4237	78.4056	35.7107	8.31664
Alyref	0.434627	0.815866	0.661425	10.5206	10.7896	7.93286	5.34679
Alyref2	5.08636	2.92909	5.93659	30.9464	21.3033	2.05002	2.52264
Amd1	33.8742	0.666257	59.9236	129.917	151.066	88.2132	36.2606
Amhr2	0	0.0411672	0.100125	33.5237	65.5065	23.0747	6.11365
Anapc11	6.12644	9.35411	6.82383	20.2271	25.4376	34.5494	29.8856
Anapc13	1.00879	13.9569	4.04719	25.2576	61.2455	118.395	273.009
Anapc15	17.2255	39.8748	55.5425	95.5111	97.7009	72.566	45.4971
Anapc7	10.7457	11.0102	5.14717	24.9203	70.4218	39.7172	21.6373
Ankmy2	0.452057	4.18518	2.18945	6.89263	36.4606	21.7868	25.1173
Ankrd10	1.59133	1.39359	1.85694	103.466	256.036	325.505	53.4844
Ankrd22	2.66397	2.19203	2.76019	20.2267	0.700886	0.0594863	0.294462
Ankrd37	0.596484	2.36213	2.59887	42.0181	11.0355	1.87587	0.360313
Ankrd42	3.33625	3.74105	3.14365	7.22279	12.1786	7.6147	1.15023
Ankrd46	3.56027	3.01604	2.43256	11.2586	13.1863	3.64361	7.37569
Ankrd54	0.383706	0.429695	2.19468	13.8477	7.62328	4.46527	3.36134
Ankzf1	3.50718	3.81803	2.67375	7.14103	5.05401	7.25954	6.62008
Anp32b	16.6705	18.249	31.097	56.4593	21.9388	36.0825	36.0649
Anp32e	3.7935	2.78167	4.6913	18.3466	28.075	18.6701	34.5819
Antxr1	0.526361	0.532279	0.918393	5.04036	0.731025	0.0433944	0.00855483
Ap1ar	4.38016	3.43793	4.75928	10.2602	8.5099	2.45832	1.49018
Ap1s1	7.53679	16.7732	17.6804	90.675	150.607	243.966	89.4304
Ap2m1	2.14088	5.07029	6.40086	5.6491	6.70054	19.4777	17.1874
Ap4b1	2.70991	1.89479	1.87358	16.0362	28.8641	34.3107	9.28107
Ap4e1	1.74326	2.38368	1.27952	7.38498	4.4992	2.69868	2.34209
Ap4s1	2.89043	2.67193	2.0646	18.6458	37.5647	55.5048	4.03934
Ap5s1	0.749322	1.84023	1.62505	8.51438	7.39225	4.39746	1.31889
Apaf1	1.34763	1.04142	1.39611	8.56802	15.299	7.72847	2.20423
Apc	6.70868	6.23595	6.10885	14.6622	13.9199	2.40912	1.57331
Apex1	7.24125	22.2169	18.6142	46.7691	158.099	369.984	278.718
Apitd1	73.0489	154.766	178.55	182.213	254.784	54.1665	37.0227
Aplp2	18.3742	26.8645	13.2526	37.9444	33.5109	20.4896	80.9299
Apmap	3.59116	1.75758	2.36999	18.2306	27.4725	17.7913	21.5196
Apoa1bp	8.13865	9.09597	5.89466	17.0143	31.8422	13.2532	76.4005
Apoc1	0	0	0.200608	8.40104	13.1947	76.6714	1075.92
Apoc2	0	0	0.258291	24.0202	42.3212	13.0302	6.90967
Apoe	1.33248	2.56885	2.54538	14.7698	17.1372	17.8772	433.488
Apol7b	0	0	0.292338	25.9436	17.3605	2.61056	0.188319
Apol7e	0	0	0.149734	12.9899	11.0433	1.52394	0.055388
Apom	0	0	0.598011	28.5673	30.5536	17.2682	11.4725
Apopt1	0.74197	1.33827	1.7097	6.9853	7.93201	5.79663	40.5984
Appbp2	17.3531	13.8308	19.4496	36.9207	34.6706	45.3793	22.5215
Aprt	0.529963	2.64132	4.81789	163.03	480.966	1037.6	175.322
Aqp11	0.41355	0.663903	1.48014	56.1526	51.7773	30.2825	1.47349
Aqr	5.71523	5.8953	4.01178	15.9933	13.6243	14.8622	15.5468
Araf	8.88599	11.158	12.3827	19.7897	27.3359	61.1868	30.794
Arcn1	128.785	57.3335	18.9167	46.4954	80.0085	52.0828	107.367
Arf2	0.848476	1.00562	2.42253	36.8499	28.7913	14.59	15.0515
Arf3	6.60323	22.1549	25.7636	15.6429	5.35353	3.51087	13.2482
Arf4	8.34606	7.12231	9.59998	55.4487	52.6463	56.2175	165.33
Arf6	1.55736	1.75773	2.86608	5.9129	3.31209	1.67121	2.52876
Arfrp1	0.211856	1.55391	0.578053	9.43922	15.314	19.5763	9.53543
Arg1	0	0	0.210257	27.0428	50.2339	28.2546	0.0729517
Arg2	14.7221	287.945	135.089	94.8435	19.9022	2.81188	0.424951
Arglu1	1.28566	2.97774	3.97158	21.2175	24.1544	12.0081	14.2715
Arhgap11a	6.54484	6.69465	7.59972	20.6703	59.6389	10.9313	11.2173
Arhgap29	16.6489	23.8612	36.2331	40.985	34.181	16.0645	6.14904
Arhgap8	0.148777	0.945942	2.92096	17.9285	15.5102	3.31588	3.70019
Arhgdia	12.5335	44.2975	51.883	46.1355	48.283	98.6848	132.482
Arhgdig	0	0	0.112803	10.6421	52.7691	12.7208	1.71586
Arhgef12	3.01003	3.86031	3.90737	10.4935	7.94879	2.84712	1.31693
Arhgef3	1.47284	1.52263	1.60368	6.95385	16.7858	25.7957	11.9796
Arid4a	16.7405	13.0673	4.95874	11.6599	8.63717	2.44462	6.46474
Arid4b	4.2691	2.08652	1.25096	8.72094	8.73551	2.96326	10.1442
Arid5a	0.686628	0.740344	1.32022	9.10497	3.55106	0.214361	0.141602
Arih2	0.762648	1.08475	1.34189	17.0022	38.4823	101.507	44.663
Arl1	20.8511	40.3145	29.3786	43.7228	34.3211	55.6011	98.5747
Arl16	0.0703138	0.157397	0.526371	5.18565	3.92528	2.70847	4.42752
Arl2bp	0.148339	0.415205	1.24805	6.42704	1.70033	0.370541	1.18999
Arl4a	10.5322	14.3884	14.4062	23.678	23.5759	5.53218	6.15255
Arl4d	7.31337	4.26375	3.8125	19.4728	2.67682	2.04222	2.26453
Arl6ip4	3.76031	4.00147	2.18347	9.25332	18.8367	30.9744	26.5342
Arl6ip6	14.2927	10.65	9.9635	23.2728	21.0512	15.7482	39.8098
Arl8b	134.452	38.5241	24.0367	53.7432	110.266	136.88	75.6684
Armc12	1.20044	3.38161	3.01562	5.40154	5.83252	1.13596	0.0538251
Armc7	5.84631	5.28687	1.55092	18.4007	21.759	3.45676	2.86929
Arpc1a	1.50256	7.58286	5.87004	86.6004	163.283	56.9351	54.5474
Arpc5	3.63998	9.21332	7.19403	24.9892	28.9584	33.8335	108.037
Arrdc2	18.37	7.7859	3.08894	6.46234	3.76743	2.0471	0.145992
Arrdc3	0.304546	3.57655	4.08119	8.08281	5.34417	0.796308	3.72487
Arsk	1.93524	2.58372	5.40446	24.8376	3.10222	0.963237	1.27972
Arv1	2.50921	1.80474	1.94021	13.0194	11.9029	8.48053	1.6963
Asah1	0.434919	3.26616	2.88738	9.36135	45.7567	54.2827	87.8714
Asb13	0.45974	1.71872	0.559992	8.827	13.583	10.6749	13.8788
Asb8	13.0367	80.7754	110.477	45.0213	19.2142	17.6474	21.0985
Ascc2	4.42226	5.11879	5.77173	12.6533	23.3441	35.505	24.0084
Ash2l	9.88082	17.6584	16.8891	21.7448	35.8843	35.4897	71.7703
Asl	0	0.386335	0.178975	11.5513	6.21766	1.90206	9.09439
Asna1	6.99679	15.7367	14.4753	51.8682	86.9364	119.127	74.3199
Asnsd1	8.11684	35.2054	53.5432	33.1645	26.4185	26.8023	66.1549
Aste1	7.46773	5.90868	6.63662	28.4652	18.6638	6.89364	13.7897
Atad2	5.96656	10.6137	5.96133	30.3432	42.1621	14.4682	18.195
Atad2b	4.13754	4.18004	4.69095	18.3132	23.8339	14.1804	2.30198
Atad5	5.78982	3.76021	2.05204	7.95384	9.35866	3.63177	8.63164
Atf4	49.2926	213.149	168.969	178.382	151.675	199.631	282.189
Atf7ip2	6.7842	6.51887	6.34159	26.5782	46.1393	6.66765	3.18268
Atg101	22.1212	31.0859	28.751	90.7883	180.757	127.392	51.4843
Atg13	2.67111	6.06618	8.47922	20.7084	39.3046	54.3607	71.4691
Atg14	38.0305	45.4202	16.424	36.8162	110.658	132.372	45.7535
Atg3	5.90531	3.16635	16.3433	25.5033	97.5004	85.4681	9.90524
Atg4d	4.4856e-10	0	0.0137126	5.41478	6.43676	21.3741	15.9561
Atg9a	7.53907	8.81918	5.43796	15.4119	51.9385	88.9763	5.54205
Atl3	7.42013	3.24957	0.76316	10.7218	21.2023	2.67809	2.0745
Atmin	2.99995	9.48851	13.8911	16.9378	8.9813	2.68298	5.27614
Atox1	39.6238	74.3016	84.6711	217.092	271.769	488.388	732.548
Atp13a3	13.9494	9.20391	7.10007	27.902	68.0123	44.8029	13.671
Atp1b1	3.23342	5.77168	5.8056	7.45515	2.43963	1.58321	23.782
Atp1b3	206.129	68.0523	35.3285	73.9667	194.351	153.517	60.7032
Atp5c1	40.0539	56.4487	39.8548	165.117	380.76	488.693	638.203
Atp5d	4.95118	11.6267	4.49465	17.1959	54.3785	266.613	487.619
Atp5e	47.2384	179.879	86.709	149.339	293.053	597.132	973.886
Atp5f1	7.1622	19.2476	16.4736	42.424	90.2662	137.12	135.698
Atp5g1	2.16414	11.187	8.64835	129.619	228.996	271.528	277.282
Atp5g3	4.18017	12.3949	12.9239	53.2117	87.9255	163.483	686.275
Atp5h	0.646244	0.497243	1.30718	7.41681	16.8245	40.6416	57.339
Atp5j	2.19024	23.5615	8.64696	128.85	338.556	1130.43	1894.04
Atp5j2	18.2534	96.8948	87.3618	239.385	372.905	532.699	1143.34
Atp5k	93.5529	164.465	143.091	451.292	1089.11	2642.56	2544.83
Atp5o	3.42196	6.48305	5.898	58.8667	185.988	324.049	435.035
Atp5s	0.0510082	0.457946	0.510486	5.55941	9.10211	10.4869	6.52069
Atp6ap1	17.3076	18.3028	7.07737	27.4547	66.5308	147.524	35.3955
Atp6ap2	31.7189	15.996	5.66034	56.7669	78.8425	160.516	109.276
Atp6v0c	68.0642	97.2694	209.206	158.991	136.716	237.833	320.871
Atp6v0c-ps2	8.0391	128.669	3.30626	7.35896	36.1129	20.0881	17.9168
Atp6v0e	81.8393	118.977	101.064	285.306	405.202	460.508	251.434
Atp6v1c2	2.0345	0.898243	0.973729	11.4007	20.8363	6.55877	0.473903
Atp6v1e1	18.1813	91.441	90.7068	120.462	169.816	306.364	160.314
Atp6v1f	14.3591	41.2631	49.0705	29.8629	3.91276	43.5783	116.099
Atp6v1g1	3.11451	83.5114	72.3701	21.7023	11.1672	22.0772	68.148
Atp9a	2.98947	5.60913	4.83863	6.06662	6.8587	15.7659	5.70806
Atpif1	9.57957	54.9935	36.5803	220.236	219.469	292.9	933.372
Atraid	5.01804	13.6645	6.2774	43.4148	106.858	115.778	35.3604
Atrip	0.720694	1.22315	1.43909	5.15233	6.34329	6.60167	7.96933
Atxn10	0.399444	1.21215	0.866341	5.64908	12.095	25.3755	98.4321
Atxn3	11.4356	10.8683	12.578	54.2356	81.7456	76.8063	32.0552
Atxn7l3b	3.01818	2.01296	2.58116	8.26103	9.20837	5.75058	17.5235
AU015228	0.203619	1.99626	4.53772	118.074	48.1783	0.434293	0.158793
AU015836	9.5964	55.0581	70.2114	31.7432	1.72283	1.15037	0.331229
AU018091	4.89814	6.02736	3.01918	10.794	52.3269	150.732	80.8448
AU019990	4.77133	3.67058	2.15649	13.2783	2.53887	0.934681	0.0970546
AU022252	0.927326	1.92558	1.64003	8.13801	9.64055	9.3108	17.7722
Aup1	4.90978	3.71169	2.45642	6.22416	17.8425	50.1775	55.7314
Aurkaip1	3.51691	6.34618	6.65808	22.4517	32.335	70.5459	78.8542
Aurkb	13.5053	19.6818	6.40246	45.872	46.1785	20.2527	18.9387
Avl9	3.21481	4.33005	5.09172	10.0683	15.8243	16.0358	3.11069
Avpi1	3.20231	8.84118	6.8417	55.6948	47.092	20.4711	52.6383
AW209491	5.95109	4.70169	1.82077	11.0944	27.7631	9.56728	5.02389
AW495222	1.84933	18.7052	21.3955	7.09203	0.0737574	0.0707018	9.08185e-11
Axin1	2.69327	4.41577	4.38361	10.3047	7.86828	3.39869	1.91788
B020004C17Rik	0	0.0975336	10.431	193.824	305.733	4.22441	0.22509
B020004J07Rik	0.108478	0.566696	17.673	128.704	106.438	24.8944	2.60324
B020031M17Rik	0.192234	1.52168	29.7609	193.009	13.8196	0	0.974049
B230219D22Rik	0.390854	0.653869	1.62819	12.4899	20.5526	8.63414	3.07518
B2m	7.41682	20.2167	19.7216	124.768	195.559	89.2829	5.1603
B4galnt2	0.192497	1.00223	0.754495	7.12724	4.85763	0.774171	0.381766
B4galt3	4.99408	1.71696	3.22905	39.8694	51.2446	71.3812	39.2696
Bach1	0.623276	2.18184	1.77382	5.03284	15.1074	16.7439	8.41303
Bad	0.365324	0.52722	0.5699	6.18701	18.5838	70.846	15.6831
Bag1	0.11514	0.258713	0.655441	12.217	22.0559	14.6453	12.5319
Bag3	0	0.0886788	1.2222	11.9146	14.2125	21.5994	22.4975
Bag4	5.13373	22.6368	31.8331	10.8072	3.74484	7.0761	24.9184
Bag5	5.95018	5.39988	6.29682	47.412	56.8238	39.4983	37.8888
Baiap2	7.30002	4.877	4.28666	11.4722	2.651	19.7217	6.81323
Bambi	0.0384553	0.128641	1.81353	10.77	6.56603	6.41278	14.8386
Bax	4.21767	9.19571	14.1674	16.0906	29.7412	129.92	125.966
Baz1a	7.88307	4.03892	4.23283	26.3651	28.8734	39.6451	7.77187
BB287469	0	0.0537809	10.3181	129.461	3.90264	0.0526466	0.290528
BB287469	0	0.0537809	10.3181	129.461	3.90264	0.0526466	0.290528
BB557941	15.7433	37.2739	63.3014	35.9047	5.7819	0.3262	0.0541003
Bbs2	4.19484	6.15765	1.88373	11.9449	14.5872	2.50993	1.47229
BC003965	0.155993	0.149331	0.282487	16.9056	36.0277	26.282	20.2053
BC005537	0.484929	1.08402	1.70885	7.87692	7.67209	4.00767	10.0585
BC021614	0	0	0	10.3719	6.38765	1.17071	0.236036
BC027231	1.58414	1.95451	2.55887	34.6065	29.7703	15.1833	16.9035
BC028528	0	0	0.182244	73.342	141.21	127.884	45.2583
BC031181	11.2021	74.9422	82.604	95.3121	112.354	112.639	111.645
BC033916	0.47252	0.670423	0.92395	94.415	158.251	46.8758	2.33061
BC052688	7.22928	13.826	15.5483	39.0156	17.1671	13.0595	14.5259
BC055324	1.27022	10.8809	2.84234	14.7495	24.8657	56.8817	16.1824
BC061195	0	9.79431e-06	1.8944	15.3032	21.0497	6.6617	1.27978e-05
BC061195	0	9.79431e-06	1.8944	15.3032	21.0497	6.6617	1.27978e-05
BC080695	0.0378046	0.749569	37.5543	96.308	2.59723	0.1137	0.137815
BC147527	5.60911	7.78499	17.235	86.6228	4.25198	0.445681	0.0630604
Bcap31	75.0056	103.767	79.4288	152.397	305.046	328.948	294.997
Bcar1	5.33534	10.7017	7.64337	14.0392	3.58578	0.994923	10.365
Bcat1	3.87809	9.75522	11.6594	16.4773	55.2568	160.645	56.7159
Bcat2	1.53121	3.87389	3.00148	6.60927	19.4389	11.7574	32.4894
Bcdin3d	0	0.349421	0.679867	5.83533	6.89629	2.23291	4.39061
Bckdha	0.534178	1.05884	0.765112	7.21661	7.9409	22.3851	23.9035
Bcl10	4.97084	5.27849	8.35969	16.9585	16.485	13.9278	30.7818
Bcl2l11	8.87663	6.483	4.0269	13.7976	8.6921	3.27482	3.70969
Bcl2l12	0.777095	4.64291	2.05955	6.53166	9.02879	4.20506	14.4089
Bcl2l13	15.36	10.1007	7.8039	19.0439	26.1062	14.8192	6.8606
Bcl2l14	0	0	0.100187	20.1322	88.7162	109.388	10.3178
Bclaf1	15.0644	16.7982	11.1186	67.2063	179.007	50.0437	46.95
Becn2	2.27648	1.91273	2.80599	60.3535	143.53	209.768	4.03884
Bend3	0.200866	0.17676	0.444242	7.77557	12.0804	26.3725	4.54812
Best2	0.435206	1.70518	1.79386	9.88054	6.14608	2.84037	0.025599
Bet1l	2.7046	1.46273	0.966253	10.4127	17.101	13.6906	17.2334
Bex1	0.105993	0.12006	0.121664	29.3343	53.0966	120.356	1.00162
Bex6	0.176104	0.198871	6.48925	68.3052	136.001	88.2981	0.190556
Bhmt2	0	0.113625	0.122824	5.92581	12.9304	45.1094	0.811473
Bid	0.837292	0.42618	1.26112	25.0036	38.8736	34.8175	3.38735
Birc5	139.591	633.108	768.014	381.455	403.325	363.229	297.323
Bloc1s2	0.100564	0.796639	2.28346	10.5923	13.9777	19.1641	32.1265
Bnip1	3.68303	20.9722	37.697	16.4162	14.8804	12.416	19.3169
Bnip3	15.38	16.9066	18.0299	57.5185	170.969	169.45	10.9976
Bnip3l	9.78514	20.8126	24.6224	44.8392	93.4133	85.2886	26.8406
Bod1l	8.21453	2.87443	1.67874	5.59801	12.8947	4.20211	1.98941
Bola1	0.696005	4.9157	6.42708	98.1026	59.3599	40.9476	54.5994
Bola2	4.14613	11.7312	11.9285	500.322	1221.63	1213.11	915.762
Bop1	2.20138	4.11185	1.01017	29.3221	93.2078	88.1337	53.2347
Brat1	0.387893	0.491707	1.09173	7.93861	7.0538	2.04728	3.68016
Brd2	35.7783	21.9955	13.6902	27.7922	48.9467	34.3275	37.595
Brd8	12.5129	11.146	5.7145	17.1071	29.1715	28.25	25.511
Bri3bp	0.0999837	0.020258	0.106755	7.40916	18.9126	28.5444	9.7128
Brms1	3.51959	22.9431	17.898	71.1228	97.6345	107.725	49.2516
Bspry	1.80342	2.67871	2.60982	22.2701	12.2274	5.36483	0.593466
Bst2	25.5402	16.1983	8.96134	18.5652	13.2815	14.6449	6.02836
Btaf1	3.44425	2.9459	2.99545	7.2064	8.85251	2.74044	2.83368
Btbd18	0.0377078	0.168357	1.12179	79.0031	134.549	54.8314	0.872018
Btbd19	0.0532214	0.0594827	0.361679	5.03921	1.33717	2.84086	1.95499
Btg2	2.96558	5.84435	6.2287	7.64061	2.15738	0.418488	0.566084
Bub1	7.12021	29.7662	19.7051	23.7773	22.7745	25.6343	25.3361
Bud13	16.1593	22.3485	16.8726	37.5741	38.7003	31.9424	16.347
Bud31	5.29775	26.9019	18.0357	105.061	186.277	126.719	110.871
Bysl	0.789103	3.33431	2.732	21.9275	38.011	61.2448	30.8924
Bzw1	30.1302	38.5297	39.0262	206.347	368.056	280.378	222.989
Bzw2	8.69093	8.11431	5.24873	25.5846	93.9297	81.4915	167.362
C130026I21Rik	2.5641	3.26294	4.51054	33.2983	49.9694	30.9306	0.0628879
C1d	0.86779	1.4284	9.41077	118.761	96.9307	126.617	41.0975
C1galt1c1	12.1706	5.45123	2.20969	7.13153	2.67856	5.38042	5.7246
C1qbp	9.13075	3.84489	35.8569	188.953	233.012	749.348	220.852
C1qtnf4	0.0567115	0.12741	0.154938	16.7476	22.3605	16.3156	1.41305
C1s2	0	0.114782	0.337328	7.67333	2.8665	0.511598	0.198505
C230052I12Rik	0.495733	4.58982	6.2177	54.5899	60.8555	16.6514	6.38599
C330021F23Rik	0.251842	0.74445	1.35275	24.1243	66.5869	165.716	220.246
Cab39	9.81962	6.96966	9.91974	49.7152	52.492	76.9007	23.924
Cabp1	0.205339	4.5453	2.99788	9.42482	13.5257	1.42857	0
Cactin	2.60252	7.53545	4.81139	9.75625	37.5746	19.2	30.2455
Cacybp	1.1684	2.01704	3.90645	42.0884	56.5506	81.4614	316.699
Calcoco2	0	0	0.73118	68.0534	264.387	811.497	839.926
Calm2	9.68057	88.7588	83.7749	354.64	512.846	232.954	308.663
Calm3	0.667017	0.426362	1.25302	6.65682	6.96206	9.19054	29.4492
Calml4	0.284915	0.162371	1.37732	23.4387	23.6566	6.50449	1.72344
Calr	50.2589	104.338	78.0648	122.3	140.224	114.902	436.496
Calr4	18.5255	88.4227	112.31	39.6549	4.78362	0.893763	0.733638
Caml	8.86379	37.1671	23.3515	49.8826	88.4918	58.3986	35.7271
Cand1	20.1147	40.3521	41.5443	50.4377	104.16	137.969	80.6796
Cap1	0.520159	1.7297	1.99714	7.03884	12.9743	32.5029	46.3404
Capn11	0.0533146	0	0.205312	5.36102	11.7519	3.13046	0
Caprin1	12.1259	20.9815	22.901	34.0358	72.1637	123.215	236.841
Car9	4.59981	55.3572	75.8353	10.834	1.9942	1.82353	11.236
Cars2	1.3671	1.26865	2.1989	10.532	15.4832	28.5332	7.31468
Casc3	0.148613	0.511851	0.599638	8.7887	9.31161	14.7807	5.36823
Casp3	1.94286	1.47027	2.30054	26.3268	20.2179	38.143	22.2584
Casp6	0.209295	0.880989	0.547575	8.99458	30.4372	86.2393	42.1444
Cbfa2t2	4.1036	6.55601	5.61716	12.7111	25.5398	3.46749	11.64
Cbl	3.93805	7.84026	7.57361	15.2358	22.8261	13.764	5.98936
Cbll1	8.49396	7.86665	9.11012	34.7263	40.6193	24.9345	16.6151
Cbr1	0.308475	5.47643	6.23678	18.2749	36.5727	59.6101	45.9607
Cbwd1	0.10838	0.567453	1.88948	19.8534	49.8862	37.6214	16.2307
Cbx3	0.483299	0.857213	1.28018	47.4889	98.8939	102.775	104.718
Cbx5	3.37587	9.98909	9.66423	10.4034	14.2239	13.1473	16.0234
Cbx8	0.0552696	0.37242	1.30834	7.14044	8.78639	1.62514	2.47732
Cby1	9.49132	10.1948	13.1534	37.2139	47.6658	8.53723	12.6077
Ccar1	61.46	30.3501	22.5075	54.7502	103.204	54.6919	26.9744
Ccbl1	3.11365	2.67206	2.0732	6.07465	10.6709	9.18204	10.2036
Ccbl2	1.84137	8.86694	4.56135	13.4635	21.8945	8.73726	25.49
Ccdc106	1.36047	3.04214	2.77362	5.23496	1.62974	0.0424954	0.125417
Ccdc107	0.466186	4.76106	0.482464	20.3874	16.2927	11.5569	24.3397
Ccdc115	20.328	114.346	75.1517	44.2281	53.933	34.4498	15.761
Ccdc12	4.02518	9.0023	18.6417	23.8238	18.1113	35.6226	24.1697
Ccdc124	9.53415	12.3421	16.4957	108.457	231.495	496.507	146.843
Ccdc125	0.0276124	0	0.212705	6.56142	7.99274	0.610082	0.0194203
Ccdc126	0.0307517	0.447115	0.850445	41.9561	50.6519	11.722	25.7711
Ccdc130	2.6167	9.70182	8.90689	14.9685	9.61259	10.1745	6.06509
Ccdc134	0.0347157	0.271969	0.67722	8.7144	10.8852	2.17895	2.66922
Ccdc137	0.0246693	0.0826877	0.312838	22.7509	67.3841	48.2754	11.4893
Ccdc166	0.292652	0.440405	1.07721	9.23469	4.17557	1.04156	0.161439
Ccdc25	8.00425	15.4966	11.3251	56.0543	152.396	82.0716	29.9575
Ccdc32	0.192826	0.302321	0.175069	5.34638	3.43256	2.64332	5.65379
Ccdc36	3.52294	1.58474	1.69164	12.6501	4.48368	0.689387	0.182621
Ccdc51	0	0	0.379995	5.48771	6.9668	9.26503	3.47895
Ccdc58	1.81633	17.8617	17.6112	33.091	113.683	180.01	151.301
Ccdc59	86.1606	64.095	14.1135	71.473	84.3784	92.123	48.3656
Ccdc6	240.008	234.708	287.302	492.047	187.221	11.0942	9.68393
Ccdc66	2.8248	7.78279	4.86919	15.4593	23.4682	2.60209	10.4496
Ccdc77	5.51124	3.83272	2.54989	15.1281	16.008	12.0611	5.28796
Ccdc86	9.93374	9.20169	4.00933	28.5788	73.0174	41.503	19.2371
Cchcr1	0	0	0.0465872	6.80066	5.22011	6.6684	4.56244
Ccm2	0.307547	1.85121	1.73372	6.8714	9.52383	2.90935	9.52088
Ccnb1ip1	0.250218	2.91989	1.38845	38.9566	82.3203	32.1361	6.50138
Ccnc	17.4219	27.1509	17.0027	41.3322	64.7323	46.8411	39.7789
Ccne1	1.17031	0.450376	5.49351	61.3987	46.3859	60.9864	10.0689
Ccnf	5.12766	21.3915	12.8671	25.5338	49.8862	52.6352	20.5889
Ccng1	3.21922	2.01996	3.85705	8.81097	2.93026	10.8645	15.2256
Ccni	2.47119	3.51869	5.81508	6.24213	0.920744	0.749589	3.07134
Ccnjl	0.0755386	0.168811	0.148263	7.74337	1.84424	0.0716548	0
Ccnt1	36.537	29.3046	12.0279	35.8687	73.0052	39.8461	22.8625
Ccpg1	18.3019	12.5553	9.27333	19.4312	52.765	64.9339	37.0102
Ccpg1os	0.146573	0.501538	1.49062	18.4872	18.7885	16.5899	10.5143
Ccrn4l	22.0252	15.8596	16.092	33.5899	11.2845	2.83522	8.21153
Ccs	0.715836	0.896904	0.36356	6.85816	14.4505	21.2434	18.1513
Cct2	15.9793	75.8928	33.7239	42.8325	103.94	234.813	410.834
Cct3	23.4836	93.2942	45.7046	148.049	329.668	453.91	488.011
Cct4	16.5228	22.5259	11.8118	79.8726	309.713	537.729	621.169
Cct6a	0.51821	1.52181	3.37448	78.5869	219.434	420.16	652.406
Cct6b	0	0.0450854	0.237589	5.34508	3.38692	5.39047	1.33744
Cd151	3.7008	5.0818	3.05138	6.78344	4.07041	21.0263	26.1518
Cd24a	0	0.134187	2.71063	16.6931	20.2153	14.8306	6.47845
Cd2ap	3.18194	3.44126	3.77555	8.99302	7.26102	8.44029	17.6836
Cd2bp2	16.1182	19.9689	11.6312	27.5453	37.6425	43.325	23.3054
Cd320	24.889	24.1479	13.3441	97.8179	250.435	204.51	27.443
Cd3eap	7.00765	4.42414	0.819018	13.9643	22.9902	9.56518	14.6978
Cd59b	0.965656	3.70088	2.05572	19.0286	5.48807	2.64331	5.3863
Cd63	0	0	0.490313	99.805	209.378	577.498	174.012
Cd9	7.67372	48.6956	32.8005	96.2424	147.543	651.839	463.456
Cda	0	0	0.433085	10.0084	2.79938	0.686599	0
Cdc14b	2.40442	2.98117	2.8358	5.79447	6.88783	15.7982	4.54641
Cdc23	2.04068	5.53363	2.84244	10.9357	16.4756	23.0358	17.3368
Cdc25c	0.884645	1.69197	3.67184	75.1939	98.0598	18.8478	9.27761
Cdc26	58.1701	17.0657	18.2419	51.8731	25.2801	29.1518	63.399
Cdc37	3.99347	10.3279	10.0553	17.0018	42.6727	91.8777	119.315
Cdc42	65.0613	222.535	205.891	145.175	254.479	244.628	385.378
Cdc42ep2	19.7429	38.729	33.1989	48.2541	71.8387	8.32518	0.216246
Cdc42ep4	0	0.333148	0.352982	7.63178	7.38989	19.2208	2.56133
Cdc5l	0.360783	1.46071	0.918799	12.2879	29.3865	56.4611	60.1542
Cdc6	6.38759	9.70203	4.319	14.3935	37.5328	53.77	14.6206
Cdca2	37.9833	31.685	6.40521	14.8164	9.16194	3.75926	11.7251
Cdipt	5.87198	26.2834	25.3627	35.9474	63.3776	221.937	105.831
Cdk1	0.592478	32.3913	9.26322	115.875	267.785	195.764	60.8147
Cdk16	11.8178	10.1335	10.9757	31.1382	31.2199	30.4676	6.33613
Cdk2	10.4088	18.4543	8.96223	35.4663	57.9411	73.1053	104.916
Cdk2ap1	0.952764	0.500025	2.95344	321.446	705.532	573.858	12.3345
Cdk4	0.577336	3.92428	3.94395	16.1581	66.2921	184.345	290.904
Cdk5rap1	7.90625	19.2239	3.36554	11.2897	10.616	7.67284	7.46215
Cdk5rap3	0.34599	1.3346	1.6666	6.70436	15.3701	14.1488	36.1632
Cdk7	5.15454	3.88666	2.90078	9.08008	23.3694	16.0254	6.53427
Cdk9	1.20856	0.811695	1.32501	11.6806	16.7028	5.94707	3.90542
Cdkn1a	0.444206	0.828888	4.67758	18.8008	18.9728	33.8029	0.810236
Cdkn2d	0.456273	1.13096	1.96609	18.1888	14.9796	3.88185	5.39413
Cdkn2d	0.456273	1.13096	1.96609	18.1888	14.9796	3.88185	5.39413
Cdkn3	0.379428	0.287524	1.92298	29.7152	22.1804	7.58219	10.4807
Cdpf1	1.03418	8.44054	11.5639	6.35393	4.77575	4.76947	15.7185
Cdr2	18.7781	14.0743	21.3017	38.7958	4.58506	0.698412	0.97744
Cebpz	26.475	18.2804	5.4395	21.6938	39.4422	46.428	42.3537
Cela1	0.89701	6.4853	3.65304	5.38125	2.06948	1.6167	0
Cenpa	116.323	84.3534	85.7001	183.705	275.148	154.165	95.971
Cenpc1	6.93833	6.82138	1.72939	5.55763	6.01725	3.09568	4.10819
Cenpi	4.79463	4.28316	4.60101	17.7454	28.0388	18.2874	6.15124
Cenpl	1.76716	5.27923	3.83841	24.5695	20.3813	9.24989	4.57599
Cenpm	7.54181	11.6403	6.95574	18.3792	70.2485	45.0382	24.566
Cenpt	1.03144	6.19416	3.2791	28.9117	59.4817	52.6922	31.3563
Cenpw	18.0564	14.7191	20.7238	39.7108	37.4313	37.2744	73.2174
Cep63	1.94341	3.09834	3.05555	17.9108	40.1951	18.177	10.3055
Cep97	0.894811	0.757249	1.6746	25.7307	22.6083	1.9815	3.01197
Cers2	37.737	4.8569	3.82554	23.9675	138.873	289.113	83.0547
Cetn2	6.22781	59.4441	45.7541	26.125	15.7378	13.2738	33.3499
Cfap20	45.6379	33.8931	33.173	68.8462	110.13	50.5663	39.1052
Cfdp1	62.6732	50.6954	54.493	207.456	623.214	497.347	345.766
Cfl2	15.2379	68.4407	82.0738	62.812	108.08	51.4334	14.0415
Cggbp1	1.02745	0.471931	1.72856	38.3428	26.6403	21.6776	39.4815
Chac1	1.66788	4.65001	4.61479	17.2551	1.84276	0.0682122	16.7798
Chaf1b	1.01364	3.86731	5.77645	12.6578	12.8089	30.7227	41.2855
Chchd1	5.61607	27.9398	11.4947	18.3659	50.8936	183.129	264.446
Chchd10	0.278245	1.8868	6.45837	53.2283	59.9691	157.359	219.087
Chchd2	1.32906	43.2497	19.698	162.92	325.115	397.354	330.11
Chchd4	0	0.143622	0.669502	18.3127	63.3915	30.797	97.3687
Chchd7	2.59671	12.1322	7.80843	5.73765	9.30057	2.66724	76.8613
Chd1	0.702327	1.0804	0.852481	12.5264	19.8031	6.57348	3.82237
Chek2	0.280163	0.835627	2.03238	45.4813	127.22	136.853	18.1691
Chit1	0.377973	1.09014	2.86664	15.9309	4.87507	0.475738	0.0335017
Chka	0.373528	0.268378	1.32832	16.4082	32.8136	55.6535	2.3632
Chmp2a	3.35351	20.802	10.9352	91.5582	108.358	93.2157	150.333
Chrac1	0	0.12334	1.29987	22.4599	38.3223	48.6615	39.3677
Chst12	0.855395	2.6011	5.49385	26.1589	16.313	8.32239	5.44412
Chst5	4.2966	0.912334	0.621975	9.13059	2.02371	0.264347	0.732278
Chtop	1.82508	15.7949	13.1989	39.855	34.1876	27.547	31.534
Chuk	1.79543	2.26873	5.00864	18.4917	19.7257	9.16625	21.6576
Churc1	0.175236	0.803439	3.03696	38.7114	77.1302	216.735	162.706
Ciart	3.47567	5.7	2.56167	10.8571	10.073	4.31255	2.78672
Cinp	4.16922	7.42578	4.09302	16.4709	51.2772	43.541	22.6632
Cirh1a	64.8795	165.644	25.2588	73.544	151.53	227.5	98.7861
Cisd1	16.6348	64.4469	38.6676	40.0649	97.9023	62.7031	360.097
Cited1	0.809059	1.12483	5.39586	113.528	349.873	750.59	8.52938
Ckb	6.20842	40.0785	27.3919	84.2672	112.892	497.157	1275.36
Cks2	390.219	365.818	506.354	803.766	941.251	769.967	80.5896
Cldn6	0.150254	0.168595	0.911212	77.8497	25.7988	69.3357	8.03577
Cldn7	0.836027	0.939605	0.625713	9.92083	10.3025	224.354	55.9753
Clec10a	3.20411	11.8992	8.49837	8.20537	3.86693	7.71171	0.358258
Clk4	1.93978	2.64065	2.11493	12.3946	13.8721	6.89666	10.1198
Clns1a	7.11965	20.4501	15.6253	40.4795	94.0852	148.039	50.1445
Clp1	0.118704	1.55117	11.1025	114.762	124.625	57.6466	39.6484
Clpp	1.46304	1.87065	0.940257	44.0136	138.204	112.6	98.3791
Clps	0	0	0.281516	6.9428	3.39731	2.25816	0
Clptm1	2.98044	5.87195	7.27346	12.9207	27.0662	28.5209	37.6929
Clpx	5.72803	12.7328	10.712	93.0327	297.101	258.372	32.9197
Clta	16.7911	28.6691	18.7004	115.521	225.596	371.44	432.844
Cml1	1.35399	1.52814	1.12272	7.87731	5.12417	0.795215	0.182871
Cmss1	0.553798	2.96117	2.43222	8.30151	43.4368	31.8841	20.3365
Cmtm2a	1.99749	10.9974	12.7592	6.56802	0.982394	0.221669	0.0551579
Cmtm7	0	0.0920047	0.328732	5.69163	7.04732	82.3218	143.205
Cnbd2	0.31304	1.27633	0.976462	7.48858	12.3147	5.79772	0.0946137
Cndp2	0.0332168	0.334512	0.195863	23.2226	90.768	153.063	86.3142
Cnep1r1	3.04278	2.5229	3.10391	41.3387	50.6708	28.5597	4.52473
Cnih1	44.6441	140.222	122.245	105.002	111.708	56.6117	107.545
Cnih4	2.77102	3.81305	2.05472	9.55091	18.481	24.3417	17.6269
Cnnm2	2.81762	11.5756	12.841	34.7834	25.856	8.19178	9.94546
Cnnm4	6.01522	6.04436	5.22744	14.7617	13.8015	36.6922	1.65709
Cnot1	5.09235	10.4392	9.55918	14.6778	31.1344	38.5622	25.5218
Cnot10	7.75728	8.58831	3.03084	14.9992	20.824	29.3039	30.2573
Cnot6	2.99176	2.59791	2.3682	5.70832	1.66849	2.02469	3.24195
Cnpy3	0.606286	2.24885	1.70278	10.656	21.9573	13.8765	16.3399
Coa6	0.12916	3.672	5.59633	60.5135	73.4881	70.3995	66.7888
Coa7	0.518152	1.71013	1.52509	12.0561	19.8351	40.4987	22.0135
Cog4	28.1554	38.7215	32.1742	63.6915	98.6137	33.0348	23.3325
Cog8	16.289	9.30122	4.46347	13.6707	23.497	17.805	11.6268
Coil	1.13042	2.86456	1.6197	15.2596	19.5192	20.9597	15.8737
Colgalt2	1.4714	3.13895	4.34376	11.872	1.61907	0.22952	0.169777
Commd4	0.114357	0.389155	0.262902	6.76359	24.0845	52.9845	147.915
Commd5	1.29273	3.30795	1.73524	41.64	77.4611	131.594	51.9947
Commd7	0.104177	0.395488	0.5281	22.4328	18.5489	21.7472	16.0741
Cope	5.83	22.0471	8.76779	27.0853	67.2968	152.775	145.265
Cops3	48.0044	36.699	8.34649	35.3944	93.333	74.1825	137.357
Cops4	23.726	75.3685	89.4164	91.249	150.496	175.623	160.629
Cops6	5.15909	19.8789	12.0262	82.9713	176.534	279.717	271.171
Cops7a	12.0658	36.9856	48.5709	75.4645	120.705	256.362	243.979
Copz2	4.77569	12.823	13.8553	12.6638	2.25415	0.761698	0
Coq3	3.46116	5.74354	3.86055	8.91939	21.6731	14.0694	14.708
Coq4	0.538552	2.29083	2.32967	31.5655	33.523	12.142	16.0773
Coq5	9.22284	6.21798	2.40742	8.77873	17.1564	28.4189	18.5486
Coq6	1.53296	6.87611	3.46298	6.48413	16.046	30.295	25.097
Coq9	1.34653	11.0026	7.83457	8.92802	19.9891	11.2257	16.2059
Coro1a	0	0	0.0202286	5.14091	6.62809	18.9255	0.0315302
Coro1c	1.68411	6.63387	4.68626	9.14717	7.04101	34.2869	93.9393
Cotl1	1.35533	2.83641	5.07126	21.6165	14.1226	6.49484	15.1073
Cox11	0.684352	0.696153	2.37313	8.1962	5.29742	5.13084	13.5026
Cox14	13.5492	19.9429	22.4889	91.2547	106.242	78.1385	125.907
Cox17	7.03462	4.92289	6.38274	95.7126	295.622	532.926	893.153
Cox19	1.55652	6.63839	4.4846	6.99435	31.0383	68.8591	52.1981
Cox4i1	20.928	83.1832	31.5292	317.129	822.261	1379.2	2316.85
Cox4i2	0.13984	1.59317	1.09774	29.9535	37.1898	10.1574	0.103129
Cox5b	8.77095	16.7139	23.4155	21.9772	14.8573	29.3089	57.8814
Cox6a1	203.598	180.017	100.238	407.924	686.228	817.642	1754.06
Cox6b1	26.1426	123.894	95.3279	327.758	518.634	931.17	2097.2
Cox6b2	188.199	252.494	406.826	729.684	184.908	25.0461	12.139
Cox6c	110.273	251.7	201.424	249.052	142.202	889.014	1833.09
Cox7a1	0	0	0	18.4176	29.854	45.0189	97.7663
Cox7a2	58.0683	74.3775	82.7714	202.88	211.363	353.693	541.003
Cox7b	4.03342	11.8833	8.75679	63.5217	44.4739	89.5423	323.661
Cox7c	0.762917	1.12956	0.990146	10.9962	31.3807	146.481	240.358
Cox8a	623.667	577.254	950.619	1894.91	1213	1633.59	1865.2
Cpeb4	5.36757	9.48023	12.5065	11.3181	8.19204	1.483	1.64048
Cphx2	21.4699	44.6639	90.5841	72.6672	80.6737	30.4767	0.00575803
Cphx2	21.4699	44.6639	90.5841	72.6672	80.6737	30.4767	0.00575803
Cphx2	21.4699	44.6639	90.5841	72.6672	80.6737	30.4767	0.00575803
Cpn1	0.0405973	0.36384	0.589942	18.0528	21.5158	6.90228	50.8022
Cpne1	20.5447	17.0381	8.09149	27.0777	51.4615	35.5372	16.1009
Cpne8	0	0.0448191	0.106287	5.8916	1.42011	5.06232	12.5809
Cpsf3l	2.36916	2.8475	3.84095	27.984	70.0907	65.6105	47.6601
Cpsf4	12.4044	10.9054	6.46042	40.7927	57.8843	20.0846	16.1638
Cpsf6	7.97591	5.31392	4.60402	20.5422	26.8661	18.7798	20.666
Cpt2	11.1484	8.5643	2.89526	9.92032	4.77235	0.37913	11.3858
Cptp	3.80047	13.4725	15.3426	31.3359	17.2169	3.78217	3.41068
Crb3	41.3637	28.6648	29.501	103.718	123.328	78.4363	1.31108
Crcp	0.464919	6.02975	6.72154	29.2785	74.6883	48.559	22.1835
Creb3	1.22651	1.05811	0.471804	13.3923	14.8729	25.6393	21.2735
Crebrf	1.70834	2.13557	1.48184	6.21127	14.1493	4.33441	0.901468
Creld1	0.104805	0.0781989	0.206041	7.87431	4.35257	0.124593	1.72516
Crem	0.318043	0.969955	0.717479	7.88694	8.16149	2.05518	11.8336
Crip1	0	0	0.182244	13.9032	2.6562	67.3139	72.1018
Cript	40.0465	219.516	263.858	318.131	233.254	137.187	108.99
Crkl	11.2801	10.4265	6.75552	19.4867	9.6439	6.99791	13.1641
Crlf3	34.3463	25.1697	10.8467	35.0524	81.1514	46.5962	27.3309
Crot	1.67236	2.81608	3.08981	5.84227	10.0224	6.48181	19.1078
Crxos	0	0	3.21704	199.84	545.227	1479.42	404.763
Csde1	111.978	164.725	184.516	286.518	292.573	229.864	149.836
Cse1l	28.216	30.4461	21.836	46.3475	121.191	98.836	97.3429
Csk	3.60422	4.28829	4.96459	8.14072	3.65523	4.96102	7.27959
Csnk1d	1.69332	5.50548	6.06115	5.50291	10.2471	8.01597	15.23
Csnk1g2	2.87735	2.12687	3.43168	6.11047	5.27663	1.77031	2.46229
Csnk1g3	3.23447	2.87968	2.96525	7.98574	3.90838	2.30535	0.435969
Cst7	0	0	0.0401291	46.3417	50.7273	13.3827	1.01174
Cstb	0.588203	7.89408	7.30393	108.985	59.6235	510.975	627.516
Cstf1	74.536	47.1318	15.1811	85.2894	95.5444	54.0076	32.9113
Cstf2t	1.07298	1.92369	1.20152	20.0676	37.6301	13.6754	11.162
Cstf3	3.7396	11.7323	5.83578	29.5383	25.3832	19.602	15.2105
Ctc1	1.89184	2.0523	2.0787	6.96936	10.4252	6.87609	11.9076
Ctcf	13.2862	9.28988	12.5526	25.2491	20.2569	10.132	5.67923
Ctf2	2.40163	2.6044	4.81941	16.4011	1.43363	1.01691	0.362784
Ctps2	1.20562	3.37561	1.57866	5.08836	6.86011	2.96773	5.57772
Ctrb1	0	0.115751	0.140757	7.62222	2.49236	0.0742666	0
Ctsa	0.841131	1.06214	1.06488	29.3326	101.944	381.463	86.108
Ctsb	5.99592	11.5056	4.64319	77.0088	287.206	249.815	60.4636
Ctsc	0.0279167	0.124831	0.784326	130.89	474.784	668.659	90.0935
Ctsl	0.108737	1.37956	15.7979	374.583	1203.78	876.368	424.778
Ctsz	0.110539	0.18621	0.377406	23.9124	96.4295	267.785	12.013
Cttn	4.79654	4.71802	3.68404	16.7157	28.1866	59.8121	70.8172
Cuedc2	0	0.229231	0.154989	8.20036	17.313	13.4728	31.5316
Cul3	3.64367	3.91969	1.91782	177.751	314.991	12.3639	13.0568
Cul4a	12.9021	4.19569	2.61722	5.69281	6.74316	6.40834	6.73147
Cwc22	29.6187	27.2758	19.1108	58.4476	97.4882	32.9994	19.9442
Cwc25	7.50911	5.76929	2.07373	15.218	24.7951	12.3412	9.85792
Cxadr	0.499075	0.466017	0.589853	22.3689	52.2104	76.3605	15.8599
Cxcl16	0	0	0.127919	14.1824	3.90968	0.880024	0.653387
Cyb5a	6.12324	118.759	64.8982	28.0547	2.99133	25.2991	97.3866
Cyb5d1	4.74868	8.02617	3.9631	9.8956	19.783	7.22858	4.70965
Cyb5r3	10.312	23.6707	20.9854	22.8967	19.2155	4.3584	85.2777
Cyc1	0.94444	2.27749	2.96958	36.0669	67.1323	141.296	344.991
Cycs	6.6791	7.70474	7.4728	18.4166	35.019	45.0333	52.8648
Cyhr1	2.38321	3.60733	2.86761	11.9892	0.92858	2.88014	6.95599
Cyp20a1	5.3605	10.9005	7.99011	13.7627	11.9727	14.1315	6.93291
Cyp4f39	2.40714	11.2868	14.8873	6.08405	0.0912879	0.0930967	0.128737
Cypt2	0	0	6.84225	5.38576	0.660551	0.444212	0
Cypt3	0	0	3.08977	7.27347	1.90526	0.839961	0.726204
Cystm1	4.01148	3.69452	4.85954	33.2534	17.9799	100.445	66.4017
Cyth2	1.44512	8.41179	6.73931	19.1892	44.2693	87.3942	37.3513
D030056L22Rik	0.818054	0.611461	5.39096	128.95	149.809	35.1737	26.4378
D11Wsu47e	4.44284	8.72429	4.27566	9.68713	13.5584	9.29451	6.33957
D15Ertd621e	1.75883	1.80797	2.12124	5.43495	5.89888	5.16103	3.89378
D16Ertd472e	0.660886	1.23536	1.21943	15.1816	23.9629	0.738321	5.35438
D17Wsu92e	5.56816	8.38899	8.71035	17.189	11.8945	3.10999	4.84893
D19Bwg1357e	5.71166	9.23672	6.79346	26.5384	96.4193	82.9821	55.7573
D1Pas1	0.354322	0.442168	2.36783	19.0829	25.2447	2.14761	1.60797
D230025D16Rik	31.7866	35.2446	12.962	64.6641	126.866	113.906	63.5292
D2Wsu81e	1.94114	9.50106	6.67295	21.4049	36.4163	32.899	41.075
D430020J02Rik	0.561779	1.17663	1.54747	5.62556	2.56192	0.199742	1.42978
D5Ertd577e	7.68116	17.2821	18.8928	20.6987	21.8567	15.8847	0.0769511
D5Ertd605e	0	0	0	7.45141	6.62927	2.79466	0.795004
D8Ertd738e	33.9515	102.396	110.099	323.617	664.994	615.038	259.978
D930015E06Rik	20.5443	9.24621	2.21369	7.82521	7.90083	4.1741	3.17496
Dad1	84.0297	443.782	321.683	200.47	250.62	400.295	405.552
Dancr	0.0817816	0.0922562	1.36495	28.6918	102.054	18.489	3.73625
Dand5	3.52147	13.1295	11.9579	9.01233	2.54415	1.12555	1.95701
Dars	17.1436	33.1936	20.88	35.436	60.2704	76.3554	200.206
Dbnl	0.324183	1.41635	1.26082	12.2073	23.0624	57.9494	42.9752
Dbr1	1.34416	1.12805	5.51004	22.0404	18.9844	12.831	26.6232
Dbt	3.24587	0.838026	1.08338	10.6113	12.354	16.9221	21.6194
Dcaf11	3.48953	19.6291	15.1058	23.9047	29.6473	14.2612	19.585
Dcaf13	23.63	37.9861	21.9005	95.7874	203.652	258.866	79.1575
Dcaf4	5.97806	7.78614	8.22917	17.3312	78.8358	137.953	39.9062
Dcbld1	7.32632	8.70455	5.66575	15.7157	16.9454	44.5494	45.894
Dcdc2c	0	0.0997035	1.02357	6.93688	1.92347	0.192475	0.095646
Dck	1.4417	0.934089	3.25833	15.5645	29.7814	20.1992	19.9392
Dclre1b	1.73628	1.56308	2.07728	13.6243	16.9261	6.85072	6.49568
Dctpp1	4.48396	14.8127	19.665	79.286	64.8341	167.544	424.209
Dcun1d2	29.5302	11.5259	5.38137	14.6814	12.9423	7.09711	3.08517
Dcun1d3	0.297112	0.78984	0.83658	5.15818	7.33077	4.47947	4.55862
Dcun1d5	47.8068	16.2703	120.184	135.339	41.1166	63.5607	74.0477
Ddhd2	4.17991	4.15043	3.02215	15.0991	23.2473	13.1115	8.82293
Ddias	25.5079	49.0751	52.4655	80.1279	209.594	73.9043	16.2638
Ddit3	4.41327	35.047	30.6045	30.3236	11.8431	5.94987	18.1362
Ddit4l	0.125276	0.671893	7.04162	88.4729	7.98684	5.15132	0.686522
Ddr2	4.94763	4.23055	3.65838	9.18029	5.02963	1.25019	13.4482
Ddrgk1	1.05298	2.11879	2.31891	6.68038	11.4276	16.1875	31.2982
Ddt	1.91758	9.25781	6.7823	63.2082	41.944	30.9079	224.716
Ddx1	1.41173	6.15645	4.0474	6.20611	19.9389	60.4505	115.937
Ddx10	12.7023	10.0684	3.44267	22.0538	84.3063	47.6149	34.6163
Ddx17	2.2008	1.62327	1.70732	5.90083	14.4008	15.6766	11.703
Ddx18	28.2779	26.4343	8.95302	20.5314	39.0944	55.9175	30.4488
Ddx19b	5.3989	3.31327	2.64837	7.04986	7.42939	10.6752	4.12039
Ddx20	0.528552	3.82478	4.17245	55.8583	124.943	49.9942	36.6325
Ddx21	2.03738	6.38946	3.20203	20.1525	69.307	98.7683	41.1539
Ddx26b	0	0	0.24273	10.3265	4.78643	0.466986	1.66078
Ddx27	15.3602	11.3854	2.36155	37.916	69.9456	61.7634	51.8786
Ddx31	0.160369	1.16376	0.866374	9.2659	19.3718	21.7953	6.10915
Ddx39	70.1584	64.2012	50.0866	166.911	246.365	235.341	220.317
Ddx39b	3.07009	21.1837	4.93811	17.4304	61.9343	145.652	192.717
Ddx41	3.69025	11.3698	8.13042	23.4733	37.3353	34.7798	47.3893
Ddx43	0	0.0710231	1.09402	5.79789	1.47602	1.28962	1.24131
Ddx47	23.8404	23.9474	12.8147	96.9922	194.572	123.207	106.317
Ddx49	1.44737	7.3257	3.08405	29.2284	76.5833	122.971	35.0591
Ddx50	1.67601	11.0411	10.5054	8.09839	15.9684	5.35268	12.5438
Ddx52	24.2528	17.0605	8.14824	51.253	98.7549	49.201	34.6711
Ddx54	1.29616	1.43692	0.9191	24.6832	70.9804	36.8603	32.7937
Ddx55	24.1907	12.2994	1.03342	6.19018	9.63224	16.6536	10.9205
Ddx56	6.17745	16.384	6.67671	16.466	62.0603	86.2635	53.6373
Deaf1	0.198702	0.0785614	0.909597	8.64754	5.7196	4.89385	2.34811
Deb1	7.27062	10.035	22.7479	75.4986	104.141	104.217	69.8376
Decr2	0.207584	0.425914	0.549335	27.6772	70.6064	18.8727	15.0204
Dedd2	0.118858	0.266264	0.125921	40.4922	30.4439	30.9126	8.84939
Def8	0.452885	2.52693	3.00766	19.2394	32.5819	62.5597	9.96786
Defa4	0	3060.83	966.919	3735.59	0	0	0
Defb13	0	0	20.9215	61.3332	0	0	0
Defb42	0	0	0.0878254	22.5386	55.2679	14.1544	0.1419
Dennd2a	3.15839	1.42556	0.64429	6.20025	6.96818	1.26108	0.0822151
Dennd5a	1.81424	1.7611	1.97646	7.89036	6.24655	2.61018	2.22644
Denr	3.66272	6.09275	10.4113	70.2911	112.178	74.6205	68.5539
Depdc5	0.830455	2.5405	1.74685	5.81109	4.92885	1.49685	2.24761
Derl1	4.25571	3.89464	2.4188	6.70224	14.4144	16.1766	27.8758
Derl3	8.64583	76.6687	88.9864	26.7864	8.67944	1.84074	12.7056
Desi1	6.71568	12.5242	12.2001	18.5662	10.9827	6.52684	17.5211
Det1	1.35941	6.71901	7.55446	5.99445	3.16066	5.36216	2.62807
Dffa	7.03215	5.35765	7.33469	27.1829	26.6026	15.5216	10.7206
Dgat2	14.2747	7.05351	1.87328	17.6998	41.4789	43.8623	4.96683
Dgcr14	7.87235	34.1027	27.5558	31.0087	32.4077	16.839	14.1828
Dgcr2	38.7554	9.28794	3.45883	10.216	6.66853	6.09718	13.0301
Dgcr8	1.59387	3.49524	2.05982	7.667	16.2244	10.799	4.73002
Dgke	3.23128	1.67028	1.96966	17.9234	26.6223	3.57706	9.33634
Dhdds	11.4787	10.5152	8.12407	16.4597	22.4414	18.7912	6.31825
Dhps	0.994681	1.11768	1.14596	14.0659	28.1227	33.2207	59.2135
Dhrs3	2.45418	14.1525	16.2137	5.27229	0.511004	0	9.15779
Dhrs7b	0.241291	0.757847	0.504683	8.64164	28.2864	90.2783	23.6383
Dhtkd1	2.42091	10.662	5.53622	9.62364	14.4417	10.1165	1.11124
Dhx33	1.58164	3.9367	3.28165	7.88209	22.3744	15.6429	8.4389
Dhx40	11.6597	19.6417	11.2351	23.7138	43.5239	34.6323	30.7677
Dhx8	17.3468	15.4381	6.15894	39.1731	55.7294	31.4064	18.1737
Dhx9	0.267616	0.486984	0.439386	5.34534	11.4657	9.1936	9.76408
Diablo	17.1111	18.114	16.2382	52.0361	88.7728	91.2628	53.2871
Dido1	2.22719	2.8644	2.21169	11.0657	16.6153	5.41423	8.21607
Dio1	0.310482	0.0994412	0.181391	5.44763	1.83778	2.28362	0.0314132
Dis3	0.461381	0.455503	1.56371	18.274	25.8463	22.6715	20.6746
Dis3l	4.30361	9.65373	15.2776	27.1231	14.7399	1.91558	5.79326
Dkc1	120.309	67.7619	21.122	70.912	77.0609	127.43	88.0662
Dkkl1	0	0	1.64412	38.9193	38.5113	11.491	3.53709
Dll3	1.20348	3.42059	2.58138	5.6927	2.07004	4.61399	0.435541
Dmap1	4.56025	11.4915	4.61283	9.97776	32.7185	88.7275	48.5035
Dmrtb1	3.96795	5.48834	7.09711	20.6007	45.8307	41.7072	0.629849
Dmwd	3.33246	2.99218	2.46295	6.10845	2.11658	1.06943	1.21017
Dnaaf2	0.285235	0.115911	0.619624	15.709	39.065	16.734	13.3355
Dnaja3	12.664	24.4173	23.147	26.5326	12.964	20.6747	27.0962
Dnajb11	24.2253	10.6623	6.89522	36.3217	66.4516	85.3232	73.1304
Dnajb12	1.68358	4.89956	6.88133	11.2557	22.0926	39.3317	19.9616
Dnajb14	0.624561	0.743214	1.32912	78.4767	115.563	44.3887	3.64117
Dnajb6	42.8253	89.8955	69.6134	121.194	305.839	422.104	135.495
Dnajb9	1.52816	10.3985	21.7605	343.077	792.073	204.093	23.9183
Dnajc12	0	0	0.556228	37.5671	52.305	16.4615	4.44595
Dnajc15	4.78288	22.4015	13.1175	100.135	380	470.988	244.308
Dnajc17	6.37341	24.4263	21.7333	24.2013	36.9625	14.1295	11.9688
Dnajc21	23.3267	17.0558	17.0335	53.2662	62.3506	36.2398	9.5308
Dnajc30	22.0955	11.523	13.3273	27.217	20.4896	12.7759	18.5252
Dnajc4	0.444077	2.01378	2.49983	24.4885	12.4285	5.57696	20.8794
Dnajc5g	0.383028	5.15546	7.69525	5.69389	6.26177	4.52353	2.75067
Dnpep	0.0900874	0.100998	0.481049	18.6307	22.1895	25.8615	68.1554
Dnph1	0.0747509	0.0842247	0.0682811	11.1565	20.4295	74.2872	13.4856
Dnttip2	171.662	101.194	10.0411	62.9424	185.49	218.942	133.331
Dohh	0.845172	0.889475	0.721107	25.0187	71.1898	80.9601	74.7681
Dolk	0.36501	1.96775	2.21234	16.7851	38.1139	15.7087	11.5556
Dolpp1	0.110916	0.0413934	0.251573	9.14387	11.5056	21.126	13.7646
Donson	4.43474	2.88173	3.31426	9.34579	3.64304	0.59766	1.16023
Dpagt1	0.49047	1.39411	1.33573	7.13994	11.4987	18.7576	31.9806
Dpf2	3.12814	4.04036	5.21145	31.8512	56.057	91.697	44.3975
Dph2	0.871742	1.30935	0.506074	9.51355	19.1877	13.5547	11.36
Dph3	5.96202	19.3268	18.4452	34.1483	65.2978	113.363	33.4904
Dph7	1.18973	4.50353	1.89467	11.1793	11.4052	3.26701	3.24114
Dpm1	3.77129	2.51699	3.81229	23.2522	39.9544	27.8699	27.9363
Dpm3	0.884995	1.03487	1.10967	24.4622	20.0792	33.3758	38.3529
Dpp9	1.68374	1.77381	1.38672	9.07243	22.4643	2.63364	7.34488
Dppa2	4.46549	16.6511	23.0712	55.2339	221.689	224.014	137.564
Dppa4	0.0979925	2.19867	2.13195	75.7788	217.592	163.603	98.5043
Dppa5a	52.191	137.489	39.5477	456.244	766.449	1862.7	10923.9
Dr1	0.938655	3.48602	4.348	54.1796	71.4989	17.611	43.7966
Drc1	2.26069	2.97674	2.93494	12.6411	26.5064	7.52387	0.741382
Drg1	10.4715	22.8316	19.4309	81.769	170.872	268.62	245.137
Drg2	3.25472	14.1582	17.3828	59.7162	150.312	304.079	54.7363
Dscc1	0.897504	2.89163	1.69006	13.0725	26.8075	43.3069	25.804
Dst	2.2493	2.09425	1.73972	5.59193	2.54914	0.505089	1.17157
Dstn	15.6681	39.3903	63.6026	88.1802	61.944	60.9476	208.702
Dtnb	2.90198	5.33131	3.56326	8.39556	14.7455	6.06456	2.6806
Dtymk	12.323	24.953	16.3004	127.351	237.778	336.733	395.447
Dus2	2.01224	5.34854	3.44843	12.821	14.6187	14.6941	7.37834
Dus3l	1.36113	5.00633	2.39959	5.04929	8.66609	30.5697	27.3344
Dusp10	5.256	24.6157	23.6641	25.8013	38.5052	15.4045	19.1093
Dusp16	3.29964	6.55224	6.5463	11.1603	11.4589	3.05313	2.7095
Dusp22	1.58234	1.1004	2.61503	12.9706	6.66451	2.30534	0
Dusp6	0.704557	0.651427	1.93096	19.4244	1.71114	2.05637	28.2575
Duxbl1	0.535965	4.16466	12.9247	12.441	4.68535	3.37592	0.478003
Duxbl1	0.535965	4.16466	12.9247	12.441	4.68535	3.37592	0.478003
Duxbl2	1.03289	7.40449	19.212	37.3863	22.8991	9.01787	1.21928
Duxbl2	1.03289	7.40449	19.212	37.3863	22.8991	9.01787	1.21928
Duxbl3	0.123625	2.42594	9.22073	17.7977	14.621	5.4155	0.633392
Dxo	1.31072	4.29711	3.00377	18.0454	29.7076	19.3495	17.5243
Dync1i2	34.0041	229.543	233.292	82.7047	11.7779	12.5377	22.5001
Dync1li1	2.86302	3.98584	2.93043	27.4221	41.0688	30.5948	24.2244
Dynll1	8.76419	89.0133	91.3278	181.596	264.525	126.48	215.22
Dynll2	3.51106	3.70689	5.45492	15.2811	9.37785	8.72906	6.21333
Dynlrb1	18.4241	122.948	63.1219	181.835	147.445	263.263	320.789
Dynlt1b	0.487866	7.8973	3.17649	6.34586	4.099	7.00164	52.3377
Dyrk1a	9.30645	9.05201	9.26645	24.3526	24.9598	9.67548	2.96372
Dyrk3	0.512838	0.612161	6.06405	43.4516	14.1393	9.48454	26.354
E030030I06Rik	1.12835	2.55292	1.86964	14.7104	7.17807	2.88776	1.75223
E130309D02Rik	0.267051	0.0663604	0.645597	18.1133	28.6292	12.5543	3.64476
E230013L22Rik	0.116731	0.0435778	0.393151	16.8531	22.2807	13.9687	3.51682
E2f1	3.59632	3.89835	4.68564	11.1303	6.16826	1.80188	1.2101
E4f1	1.91672	1.95461	0.663868	7.01484	9.14191	13.0481	6.72661
E530001F21Rik	0	0	0.166157	15.1481	27.0549	29.3951	19.2494
Eaf1	2.96132	4.64557	3.89183	10.188	24.9667	14.8025	16.483
Eapp	25.1566	22.9376	11.7426	28.7828	54.1069	68.3957	59.3107
Ears2	0.156643	1.22808	0.640045	11.1989	9.33339	10.8641	29.017
Ebna1bp2	9.02172	13.0322	6.22775	62.6392	184.725	129.358	79.868
Ebp	0.335983	1.12945	2.55621	36.4636	50.6874	88.4482	28.2738
Ece2	51.8757	22.613	5.60538	58.1578	62.8712	57.3799	12.7137
Echdc2	1.17909	2.22358	1.82498	17.8917	38.9667	194.837	237.978
Eci1	2.20846	2.6606	2.01779	84.7326	173.78	88.9188	40.3385
Eci2	1.31785	3.15159	2.81884	5.56196	7.6938	11.0443	53.4465
Ecsit	1.01709	3.30941	4.01242	32.7393	64.9739	78.9539	22.9329
Eda	1.65858	1.67722	1.71531	5.8518	19.0075	9.35316	0.238953
Edf1	6.29159	6.64092	2.61615	91.5935	195.447	277.617	249.185
Eef1a1	38.6189	97.3671	122.43	122.993	234.561	963.297	1839.46
Eef1d	6.92867	28.4271	11.4049	33.7689	95.3813	239.937	226.174
Eef1e1	17.1866	120.747	115.176	60.5336	242.62	327.995	169.22
Eef2	17.404	20.8634	15.4673	44.4499	119.042	348.932	515.986
Efna1	52.0569	8.94508	4.68046	20.3146	10.3945	17.3859	0
Efnb2	8.46346	5.614	4.07304	12.6556	6.32426	1.78011	2.49564
Egln2	0.73766	2.36365	3.16334	10.0918	10.9782	16.4962	12.3875
Ei24	0.50212	1.79789	3.81877	39.6131	125.512	50.2245	31.4008
Eid2	0	0	0.334073	8.23264	6.56026	0.921557	1.52507
Eif1a	0.399926	0.735815	2.41813	36.5323	50.3061	127.957	106.996
Eif1ad	18.9582	16.1776	11.0802	25.4469	80.6765	54.1661	37.5716
Eif2a	16.0407	14.5479	15.8151	41.5343	64.5589	55.7663	49.5652
Eif2ak3	0.579082	0.339095	0.713466	5.07751	5.71459	1.30091	1.40764
Eif2b2	11.6387	19.2342	11.5763	28.5037	70.6931	79.6636	39.7862
Eif2b4	12.8973	44.6472	13.4903	77.8831	76.28	99.8726	56.5609
Eif2b5	0.994597	0.570851	2.59413	16.8173	28.8938	94.8637	61.1484
Eif2d	9.10067	27.8826	24.872	24.6173	25.0827	38.5606	68.8236
Eif2s1	23.4608	32.0311	28.4342	47.2591	108.306	123.844	125.023
Eif2s3x	4.396	16.6676	16.4168	29.744	62.5589	116.814	65.746
Eif3a	14.8728	10.7544	4.77062	37.892	101.396	163.061	113.628
Eif3b	3.45948	2.13536	2.62254	14.6091	35.9848	42.5338	53.525
Eif3c	23.8503	16.7728	2.72388	40.2521	89.7977	135.667	133.857
Eif3e	59.0263	36.6197	10.8007	23.2631	104.845	192.296	216.835
Eif3f	0.200339	0.280991	2.11857	12.974	7.98282	38.0575	13.8137
Eif3g	2.97959	17.0175	6.66512	95.5234	306.481	603.343	381.54
Eif3h	11.5068	40.3673	42.3452	133.842	264.477	331.797	227.164
Eif3j1	9.29625	0.0185701	23.2169	59.0115	120.052	1.42953	30.4985
Eif3k	21.6657	42.1659	29.2318	111.485	226.118	598.523	587.475
Eif3l	4.71339	11.7265	5.28831	45.3043	111.586	340.292	232.502
Eif3m	11.4621	10.8114	1.30289	20.3375	56.176	105.241	63.5715
Eif4a3	45.9902	54.6047	30.91	125.638	236.297	314.269	110.13
Eif4e	99.9715	169.946	209.381	212.909	544.91	309.059	73.0876
Eif4e2	1.12188	3.51882	4.3914	45.2626	116.785	81.2162	117.868
Eif4ebp1	0.706461	1.09701	2.34463	12.1335	34.9287	107.09	393.069
Eif4g1	10.6783	11.1741	7.28071	28.7552	53.9482	63.193	57.0221
Eif4h	1.32238	19.8952	8.61845	38.94	118.313	311.52	152.739
Eif6	31.9187	85.6467	62.9423	247.937	450.846	382.93	142.441
Elf3	5.13	15.0873	14.4927	28.369	1.75875	16.7627	269.121
Ell2	4.07913	3.98601	4.27321	27.7418	45.4842	24.3446	5.06766
Ell3	1.71731	6.95951	4.38169	8.67007	17.4698	28.5882	3.18054
Elovl6	0.0430351	0.0239853	0.0777822	8.72146	48.9922	44.0993	32.8454
Elp5	30.8783	65.3001	68.2168	138.883	232.953	80.975	77.0216
Elp6	1.20202	1.88326	0.841293	45.7264	47.8872	28.2485	8.74414
Emc3	37.9165	31.4678	17.6845	88.7764	278.877	312.413	43.9614
Emc4	2.49433	5.03086	4.69179	87.4561	231.56	298.041	109.047
Emc6	7.68528	12.0899	17.996	59.8033	94.5835	79.1092	99.1514
Emc7	9.82904	17.3688	16.9684	54.0779	77.7641	157.07	82.6224
Emd	3.39369	5.7345	7.8611	13.2888	9.00122	10.2115	11.1714
Eme1	4.40085	4.24322	2.2604	17.6499	14.8517	14.4072	6.65223
Emg1	5.85832	32.7325	13.9638	118.921	323.524	297.033	139.049
Enpp3	0.675409	0.525493	0.251248	5.43791	18.1657	24.688	2.10066
Ensa	3.95698	17.4484	19.9909	16.2616	27.3582	30.4989	15.4831
Ep300	3.83949	2.66979	2.50247	11.325	17.4932	7.91114	4.58503
Epb4.1l3	2.78926	7.39098	9.52349	5.77078	0.180427	0.161137	0.47678
Epb4.1l4b	5.30302	16.7439	23.0086	14.375	2.10975	2.0389	4.61152
Epc2	7.6189	8.70736	8.86642	18.918	12.7624	3.79144	2.61817
Epcam	0.37842	0.346494	0.639849	62.1086	65.9774	31.1715	70.8094
Ephb4	0.858262	1.57044	1.94261	7.70074	3.50095	1.61231	3.64142
Epm2a	0.0773146	0.522907	0.600554	6.64528	3.43335	2.00796	0
Ercc1	1.00127	3.12538	1.58961	22.2943	32.2889	34.7222	15.0574
Ercc3	2.6327	5.86954	3.76286	15.7394	30.1719	27.9797	21.0601
Ercc4	0.541128	1.3754	2.29877	7.52684	0.803504	1.30485	2.35929
Ercc8	1.07296	5.36511	5.55866	5.75824	5.82923	12.0494	9.07469
Ergic3	8.59779	27.0872	23.9047	27.1587	43.5561	60.2549	85.181
Erh	66.1019	85.6368	141.082	176.493	241.492	309.733	338.629
Ero1l	0.0885043	0.19744	0.506889	10.7141	8.66812	4.35354	4.47349
Erp29	35.1918	35.406	19.5686	43.9872	53.1208	43.5269	115.276
Esco1	75.3964	71.1445	88.8528	152.996	87.9396	16.9054	14.7899
Esf1	1.92397	1.16157	1.99003	28.79	55.3151	20.8433	30.5386
Esp24	0	0	0.996401	48.1858	70.4909	7.03992	0
Espl1	27.5649	15.8016	7.56371	15.6245	18.5476	15.9614	12.7261
Etaa1	2.90261	2.75066	11.6159	11.4409	6.7266	4.629	3.00335
Etf1	13.9714	24.9156	28.3393	114.99	212.267	175.884	120.207
Etfb	6.26308	6.86143	4.7418	34.8374	58.5592	128.353	495.443
Etv5	0.6724	1.00044	1.15423	9.38444	7.96355	7.00136	52.806
EU599041	2.41052	3.84901	2.68163	34.0137	22.1477	2.01595	2.94517
Eva1a	0	0.0923871	0.468123	10.9628	13.7961	28.6774	30.0953
Evi5	16.5965	12.1905	17.3092	33.9667	21.7381	5.5037	2.27212
Evl	3.43573	5.03721	5.78825	7.13415	2.10562	0.192495	0.54759
Exd2	0.903566	1.67006	1.09044	28.9004	31.8219	18.4838	7.63741
Exosc10	45.6017	43.6284	14.2056	36.3901	63.8136	53.2541	26.8693
Exosc2	5.17031	7.64407	3.96507	23.7266	25.5418	46.1284	56.7311
Exosc4	7.52053	8.56175	5.29816	13.0801	18.7033	53.5794	43.4499
Exosc5	5.57778	2.69378	2.78628	51.4597	117.557	145.695	88.8106
F11r	0.69473	0.40384	2.36737	44.2051	100.627	158.48	53.7517
F2r	0.425454	0.316667	0.449278	6.31658	2.13031	0.24471	19.7034
Fabp4	0	0	1.86037	71.5857	197.885	46.6048	0.52105
Fadd	2.47779	4.455	7.60823	6.01633	4.49137	4.98411	4.42403
Faf2	0.483266	0.539081	0.23901	16.358	32.196	14.6588	14.2599
Fahd1	0	0.122567	0.621042	12.6015	1.30783	0.0391327	7.56944
Fam102a	1.03891	1.90279	2.13866	6.5494	5.72412	4.45636	4.8668
Fam109a	0	0	0.108023	30.8362	57.0131	13.0707	4.29879
Fam120a	1.48668	2.77286	2.29561	5.72787	14.3025	19.4769	8.51286
Fam132a	59.9934	8.57275	5.3876	11.729	7.09696	16.8332	3.79275
Fam134a	0.188084	0.540567	0.450423	6.65967	11.318	10.4992	2.34258
Fam134c	2.62907	2.39003	0.668834	5.22482	16.8615	27.9235	6.02921
Fam136a	1.06518	0.311592	1.24201	8.90755	29.8935	32.7364	82.9193
Fam13b	5.01188	4.22191	2.1904	9.16192	18.316	6.67021	12.355
Fam169b	0.0481672	0.24215	0.109065	5.19736	6.95241	14.7909	2.28335
Fam175b	4.13834	4.49212	4.84347	9.97043	15.7367	18.8565	9.84089
Fam177a	13.1742	15.5305	17.8283	29.2012	19.615	15.6242	2.12903
Fam177a	13.1742	15.5305	17.8283	29.2012	19.615	15.6242	2.12903
Fam178b	2.52997	3.36723	3.52753	8.3911	8.98365	3.71434	3.32939
Fam192a	27.8432	79.1421	47.6064	63.9737	112.302	34.2033	26.4489
Fam195a	4.99238	10.539	18.9298	33.9155	69.7636	212.284	18.5631
Fam195b	0.133295	0.149983	0.0911941	7.38301	5.94406	1.34242	14.1981
Fam207a	1.05419	3.0261	2.47915	12.1597	29.2031	31.5883	16.2272
Fam208a	2.31807	1.24111	1.86509	6.92039	5.01651	8.84512	3.73117
Fam20b	0.277624	0.189264	0.411501	5.56918	5.30213	3.74304	5.89307
Fam210a	2.48369	9.27257	12.0294	9.30697	9.38586	4.28522	3.5699
Fam212a	0	0.267653	0.723288	43.8707	116.505	16.9901	0.568623
Fam213a	2.29727	12.8584	10.2578	5.58563	0.515707	0	28.4396
Fam216a	5.98755	18.7436	9.65326	45.7052	54.7959	12.6459	13.72
Fam229b	7.36083	30.5327	47.5456	18.4023	0.201764	0.509361	4.1977
Fam26f	0	0.173632	0.739008	12.0552	22.0793	13.7234	0.718926
Fam32a	10.4602	44.1707	29.4178	30.4546	89.5305	76.6104	54.0019
Fam45a	11.8286	15.4477	13.7123	50.044	49.8371	105.467	32.5616
Fam57b	0.0408693	0	0.017243	8.68303	14.8971	15.491	0.202323
Fam58b	5.94131	3.23164	5.1505	34.3972	54.8753	30.517	16.8862
Fam76a	0.182556	0.254879	0.700298	16.7282	29.3637	45.8624	11.7715
Fam76b	6.31714	3.77795	3.11176	8.45186	4.36004	2.64029	5.57532
Fam83d	9.43169	14.3189	5.05423	31.7601	9.35905	5.89405	10.1599
Fam89b	0.727545	2.08362	3.71624	11.7238	14.8811	5.9941	3.49814
Fam96a	11.6508	14.5262	22.6437	46.6368	112.028	166.729	197.164
Fam98a	2.33796	6.38168	4.08226	7.9543	9.5798	5.65708	5.16281
Fam98b	3.64591	1.95471	1.86645	9.73352	11.2954	4.54184	1.80879
Fancd2os	0.228335	0.256509	0.103977	13.7626	26.4634	8.96993	0.690952
Fancm	8.78825	5.36489	4.05008	16.3064	17.9332	17.7104	18.9676
Farp1	2.4398	6.80939	5.73451	5.89295	1.48186	0.869892	0.410155
Fastkd5	5.42226	12.8259	8.72854	14.1748	17.0199	5.23219	4.47283
Fau	14.9628	37.0101	20.0289	116.805	235.804	503.994	456.33
Fbl	0.315822	0.632132	0.400368	8.25341	14.6732	30.7923	50.2634
Fblim1	0	0.074309	0.180735	9.2725	13.1986	21.616	29.2811
Fbxl13	0.326173	0.972217	0.812828	5.16673	7.40156	1.50609	0.32493
Fbxl15	0.172873	0	0.306008	5.57391	10.2768	12.7476	4.69578
Fbxo11	20.2816	15.612	20.3541	44.1587	25.7285	9.3686	6.92735
Fbxo15	28.5928	24.5245	28.0651	513.237	1590.06	3417.2	455.1
Fbxo16	1.29882	9.49653	6.14431	24.7101	4.9844	2.24133	0
Fbxo22	10.9613	11.2491	4.92301	16.1966	35.612	41.1251	68.088
Fbxo33	10.5357	7.88363	7.06378	19.4454	20.2295	6.3462	3.05661
Fbxo36	2.70183	11.1536	11.8879	50.2763	34.5147	16.4884	2.6846
Fbxo45	0.389096	0.217058	0.300623	7.44522	10.9242	1.87559	2.08819
Fbxo47	2.54108	4.02683	2.5878	15.1416	16.3986	2.49029	0
Fbxo5	74.2717	90.4656	18.5589	80.6622	58.9315	68.3722	50.0012
Fbxo6	0	0	0.182384	38.999	31.1145	128.786	81.674
Fbxw2	2.53951	3.01496	3.24236	16.0843	21.9317	11.8708	15.0729
Fbxw9	0.157047	0.703583	1.42602	6.90087	6.57798	9.17281	14.2158
Fcf1	0.430394	12.6749	11.7988	124.456	303.58	376.234	117.829
Fcgr3	0.229411	0.837619	2.82073	172.343	197.413	107.249	6.30983
Fcgrt	0.33668	0	0.0764643	9.4333	25.2937	6.00014	0.833775
Fdx1l	0.986139	5.41832	5.46817	10.373	9.03303	36.7525	59.9773
Fem1b	2.93562	7.87853	8.96891	13.842	14.1624	4.56355	6.35436
Fem1c	3.87759	8.50478	11.5898	48.5674	52.7574	13.1488	17.0999
Fen1	0.788309	8.36157	6.809	17.5838	24.7757	35.3982	52.4677
Fgd1	3.05563	2.55034	2.32715	5.05681	1.3849	0.212916	6.89144
Fgf1	2.79318	1.67099	1.30144	8.02953	2.85557	1.31389	0.0117817
Fgf4	0	0	0.0201259	9.55965	7.66714	2.24379	9.42145
Fgfr1op	4.93047	8.36816	6.15649	18.2454	30.9952	22.7721	10.0392
Fhl3	0	0.0489656	0.20841	8.44049	5.26027	13.1336	1.77854
Ficd	1.10307	0.378994	5.46346	69.0817	72.3691	26.5108	1.5624
Fis1	16.1326	18.9273	23.3293	59.8409	72.4147	97.2102	111.015
Fiz1	15.3533	35.983	38.2973	42.4415	18.8395	30.9229	26.3209
Fkbp1b	0	0.898877	0.809684	7.94178	16.4654	7.23104	2.74366
Fkbp2	0.882953	10.0944	4.64098	17.7534	27.433	97.2759	99.8374
Fkbp3	6.69443	4.72202	6.16902	77.6162	121.675	122.802	577.025
Fkbp4	1.55795	4.13948	4.24647	75.7718	176.523	242.504	495.382
Fkbp6	3.16563	7.73026	7.79469	35.8986	86.5629	103.836	20.6313
Flad1	2.24684	12.2622	9.44393	8.72454	3.72577	5.58213	12.4167
Flot1	5.10016	8.07575	7.67118	13.5272	7.89232	3.27373	15.5949
Flt3l	0	0	0.0797914	6.2108	8.27254	8.07714	1.45113
Flywch1	0.823524	0.368215	0.261205	5.99302	3.11411	0.781654	2.529
Flywch2	0	0	0	7.27732	14.802	8.59475	0
Fmr1	0.93178	1.10533	1.6302	9.24878	12.016	7.36632	8.02151
Fmr1nb	26.8463	14.9879	10.5173	127.126	159.676	212.075	215.905
Folr1	0.059946	0.134757	0.901335	123.534	307.957	510.858	43.1667
Foxj2	1.61147	1.6891	1.39271	6.53835	3.80107	0.0457093	0.0720964
Foxj3	21.2384	56.3574	108.755	85.5491	82.8934	6.31542	6.27687
Foxm1	2.97359	5.15041	7.89171	13.4921	7.69614	1.30404	2.40455
Foxr1	7.70646	13.2063	9.11665	47.8036	40.1123	6.58742	2.9171
Foxred1	0	0.137211	0.500631	5.5487	7.16593	6.68263	23.0516
Frg1	10.7399	79.8211	18.631	95.5115	160.969	107.262	99.3912
Frmpd1os	0	0	0	10.9753	4.40983	0	0
Frrs1	0.216002	0.122792	0.134568	9.69562	46.668	96.837	53.2933
Fscn1	0.666244	1.03085	1.90361	16.5794	17.1088	32.8643	108.649
Fth1	41.8411	134.681	255.352	569.453	459.166	509.881	808.682
Fthl17	0	0	0.0301618	17.0502	7.03126	2.73751	0.310729
Ftl1	5.89292	19.2772	30.73	81.1315	143.044	165.897	413.16
Fubp1	7.05106	9.3284	3.24025	17.4091	19.9265	9.96189	15.8174
Fuca1	2.04589	9.58948	8.6396	8.0671	4.72251	1.9612	24.4326
Fundc1	10.626	6.86241	22.129	152.436	12.1852	22.238	22.9586
Fv1	0.0559298	0.125637	0.585667	7.45165	10.0963	4.57347	1.35331
Fxr2	0.454515	2.5129	1.90351	10.3584	12.196	12.3524	7.68846
Fyttd1	0.668707	2.26567	1.31394	19.8934	28.4693	20.7088	22.4965
Fzd7	0.889279	0.465806	0.432461	11.5904	18.8053	0.0860056	0.885602
G2e3	0.251083	0.705889	0.831352	23.1596	11.5134	0.813149	1.81712
G3bp1	20.7314	12.9588	9.50378	61.6037	114.994	104.246	95.5963
Gabarap	1.46621	6.93684	8.21799	71.0311	98.7578	76.3406	77.2561
Gabarapl2	10.6123	12.2181	12.8133	115.494	407.502	952.236	1057.05
Gabpa	0.0388977	0.130124	1.81686	77.6626	104.685	63.3033	34.6262
Gabpb1	40.6362	72.6199	53.9029	118.38	129.064	83.397	26.811
Gadd45a	4.1785	3.08475	2.67945	14.5793	3.83388	0.281695	1.2061
Gadd45b	0.499796	2.73962	5.32477	22.7089	23.226	4.6238	13.7316
Gadd45g	0	1.21855	4.7277	6.70599	0.658345	0.724157	29.6087
Gadd45gip1	10.6742	43.1523	20.8976	25.3721	73.3244	96.1458	84.2293
Gak	7.2329	4.16486	2.53202	7.92569	20.2577	16.8789	16.0859
Gal3st1	0.0458234	0.0513799	0.187445	5.5381	5.02016	1.04898	0.584526
Gal3st2	0.545703	0.627313	2.24135	26.8827	4.22256	0.0632681	0.0585661
Galns	0.265295	1.36775	1.09373	5.93327	2.44554	1.49509	2.23804
Galnt11	18.401	3.0851	4.38929	18.8274	11.777	8.11865	3.77698
Galt	0.481674	1.80266	1.5611	7.34254	8.06341	6.50712	16.1146
Gapdh	7.52676	10.1792	7.55128	18.0592	10.953	4.24875	107.291
Gar1	4.10226	3.91352	2.69114	8.58628	16.3183	26.527	29.8473
Gart	0.561478	1.27608	0.480974	13.5809	34.2092	67.7157	74.0184
Gas5	0.161429	0.436037	1.36526	5.5035	18.7148	34.5671	50.8995
Gata1	0	0	0.291666	51.2449	68.3811	39.6769	0.320366
Gata4	4.57286	2.91394	6.23017	16.831	11.8738	10.2475	8.11712
Gatsl3	14.5351	11.4133	11.8856	31.1932	63.6508	66.8064	45.7041
Gba	0.513704	0.268275	0.155354	5.16157	14.4504	47.5848	30.9508
Gcdh	0.86558	3.94849	4.31094	9.26066	15.9916	36.5196	47.9594
Gcnt2	3.15478	2.64788	2.52565	6.59836	3.87162	1.5042	6.2992
Gcsh	0.291154	1.83199	15.7273	543.748	1735.12	2038.93	221.659
Gde1	40.3147	36.7018	31.5108	137.602	250.01	100.333	151.3
Gdi2	53.0448	114.478	145.345	163.054	186.679	223.933	248.222
Gemin2	0.672758	1.09492	1.63875	19.5469	62.4912	101.044	51.7795
Gemin4	0.28926	0.322894	0.619542	6.54801	18.1426	31.1218	21.8692
Gemin5	1.00765	1.07692	0.353027	11.9196	38.1434	41.5588	23.2011
Gemin6	9.80905	24.6595	21.7946	25.6372	20.5225	26.1727	57.2701
Gemin7	41.2019	195.301	287.556	136.188	112.009	85.0464	77.8518
Gfer	5.10888	6.3674	15.9027	18.1948	29.6381	24.8026	11.3332
Gfod2	0.139579	0.546761	0.506594	12.9189	22.4011	3.31034	2.95398
Gfpt1	0.899245	2.23805	2.33386	12.6187	33.3407	22.3391	3.96739
Ggact	0.463888	1.04581	1.09513	7.59956	7.25124	6.80475	6.27372
Ggnbp2	5.41508	2.76205	2.21852	9.11189	7.95559	5.86885	17.4545
Ggps1	2.81289	3.24352	2.80888	8.35797	9.06759	5.92669	13.5695
Ggt6	0	0	0.0361195	5.60862	5.99586	2.69871	0.238986
Gid4	8.04473	9.79971	18.1373	23.1271	11.2652	5.4028	5.80438
Gins2	8.56406	26.1296	26.162	41.5043	14.7421	7.77592	85.3434
Gins3	17.2384	8.44103	2.06861	19.5997	72.4482	18.3571	6.90809
Gins4	9.82025	66.3792	73.2127	55.7199	146.062	90.9885	75.8993
Gip	0	0	0.158065	6.10598	4.62684	1.51111	0.254327
Gja1	0	0	1.0871	7.23596	50.6758	295.735	302.12
Gla	0.244327	0.520934	0.915056	21.206	34.1569	31.6584	12.111
Glb1	3.11481	3.80121	5.70711	18.1273	40.6179	49.8204	60.5154
Gldc	0.278778	0.174992	0.331031	6.94719	19.9271	43.4036	9.80502
Glg1	8.78554	2.23968	0.711689	5.94714	8.46541	10.2941	21.8983
Glmp	0.733173	3.18033	1.48921	10.469	30.931	173.961	101.255
Glod5	0	0	0	12.4379	13.9353	1.06227	0.595033
Glrx2	0.135115	0.164124	0.274438	5.69474	8.93519	11.7265	7.95385
Glrx5	2.95629	16.4974	19.0999	29.6735	15.8899	8.15781	12.0764
Gltscr1l	1.51019	1.73703	1.84998	9.27356	7.75748	2.68873	4.82552
Gltscr2	0.240528	1.67274	1.24675	48.084	103.056	163.25	104.968
Glud1	4.04529	3.22483	2.69135	10.4878	12.9433	1.82609	17.145
Glul	1.6213	2.08165	6.504	86.1709	123.347	87.1234	47.3147
Gm10012	0	0	0.16214	7.24063	36.0746	126.148	281.559
Gm10069	2.16283	1.9456	3.08645	6.73085	6.63511	5.15334	3.21653
Gm10334	4.86253	2.68092	2.66846	6.18642	1.19364	0.0823733	0
Gm10354	0	0.114456	0.516827	5.81685	2.07053	0.154509	0.0737371
Gm10512	11.5737	15.46	26.7114	32.6897	4.51324	0.0498897	0.0495989
Gm10662	2.40988	2.90567	17.0349	166.721	17.8945	0.900142	0.13098
Gm10662	2.40988	2.90567	17.0349	166.721	17.8945	0.900142	0.13098
Gm10696	0	0.104453	9.29178	65.814	44.1719	2.09616	0.065777
Gm10697	0.0416178	0.297411	8.29997	113.154	127.186	9.83785	0.419451
Gm11236	3.87398	0.0239043	7.46924	23.1829	0.00776278	0.00564295	0.00512008
Gm11237	0.0432936	3.20078	14.235	53.046	4.62053	0.0344588	0.133211
Gm11237	0.0432936	3.20078	14.235	53.046	4.62053	0.0344588	0.133211
Gm11237	0.0432936	3.20078	14.235	53.046	4.62053	0.0344588	0.133211
Gm11413	6.29869	13.5554	20.3804	23.9537	8.68755	1.79041	0
Gm11423	2.26048	1.35548	0.896957	18.6413	6.77609	6.77719	2.37591
Gm11487	1.57365	3.37966	17.5284	60.1572	4.43288	0.00706179	0.0897234
Gm11517	0	0.1777	1.87228	858.52	2512.88	2312.17	15.5868
Gm11544	0.0571374	0.032094	11.1317	426.145	370.723	23.9973	0.183075
Gm11758	0.849533	4.38499e-32	8.406	43.869	3.77198	4.08528e-05	0.113674
Gm11758	0.849533	4.38499e-32	8.406	43.869	3.77198	4.08528e-05	0.113674
Gm11758	0.849533	4.38499e-32	8.406	43.869	3.77198	4.08528e-05	0.113674
Gm11974	0.405138	1.16642	3.20981	69.8646	60.3628	82.6599	105.556
Gm12070	16.3514	23.5212	15.0071	32.3968	20.0793	8.84493	189.054
Gm12338	2.87407	3.54792	3.44548	45.0882	160.918	686.013	1272.9
Gm12657	20.4883	120.606	79.0695	116.757	231.113	309.552	118.398
Gm12789	0	0.124245	2.31245	103.547	38.5029	2.4704	0.478849
Gm12794	0.839345	1.58992	23.5852	69.2603	16.5542	2.8283	0.931976
Gm128	0	0.0579784	0.117509	11.2968	8.80183	3.10896	0.293578
Gm12992	1.13776	1.76264	2.49837	10.3202	2.36185	1.46211	0.701503
Gm13040	0.067171	0.625539	15.5781	45.4259	1.06457	0.161531	0.0430185
Gm13057	4.30521e-05	0.711256	15.151	51.5428	1.29967	3.11207e-05	3.12808e-05
Gm13057	4.30521e-05	0.711256	15.151	51.5428	1.29967	3.11207e-05	3.12808e-05
Gm13078	0.133899	0.074912	12.7354	88.9787	2.58267	0.00795592	0.118003
Gm13083	2.99808	2.24483	10.7059	21.1762	1.57919	1.64547	0.427049
Gm13102	0.144009	0.064404	0.445339	17.97	92.2356	162.78	27.9629
Gm13119	0.136757	0.675928	14.661	25.2085	19.2637	6.10127	0.525633
Gm13128	3.23192	2.59678	1.29042	26.7261	35.242	6.1495	86.5097
Gm13154	0.156049	0.45818	0.634972	6.04035	2.76765	19.2044	82.898
Gm13363	44.0639	46.2705	54.3987	116.379	50.3054	30.6612	17.4183
Gm13826	428.203	348.787	97.5784	209.483	562.16	1359.06	1258.29
Gm13871	0.0864206	0.0728419	0.270217	29.5117	0.00017342	0.00831582	3.14889e-06
Gm13871	0.0864206	0.0728419	0.270217	29.5117	0.00017342	0.00831582	3.14889e-06
Gm13871	0.0864206	0.0728419	0.270217	29.5117	0.00017342	0.00831582	3.14889e-06
Gm14458	0	0	0.0955127	7.73376	3.41319	1.23096	0.294453
Gm14511	0	0	0.193146	23.9811	9.26843	5.46463	1.4045
Gm14743	0	0	0.300281	18.7193	0.849005	0	0.287047
Gm1527	0	0	0.699616	9.26973	1.42063	0.308569	0
Gm15421	0.352338	3.06573	1.89102	7.83095	44.7422	106.125	388.719
Gm15455	0.156394	0.174668	3.5756	40.4381	32.1793	4.70931	5.6524
Gm1564	0.269865	0.396036	0.661419	8.5889	6.77561	1.26951	0.0794748
Gm16062	0.174328	9.45801e-11	0.336438	5.93755	2.55108	0.658505	2.11626
Gm16367	1.66251	5.90724	4.08057	40.6552	50.0949	53.5773	1.68161
Gm16367	1.66251	5.90724	4.08057	40.6552	50.0949	53.5773	1.68161
Gm16367	1.66251	5.90724	4.08057	40.6552	50.0949	53.5773	1.68161
Gm16367	1.66251	5.90724	4.08057	40.6552	50.0949	53.5773	1.68161
Gm16367	1.66251	5.90724	4.08057	40.6552	50.0949	53.5773	1.68161
Gm16367	1.66251	5.90724	4.08057	40.6552	50.0949	53.5773	1.68161
Gm16367	1.66251	5.90724	4.08057	40.6552	50.0949	53.5773	1.68161
Gm16367	1.66251	5.90724	4.08057	40.6552	50.0949	53.5773	1.68161
Gm16367	1.66251	5.90724	4.08057	40.6552	50.0949	53.5773	1.68161
Gm16381	0.20794	0.207862	7.16496	274.115	78.3097	1.58936	0.945472
Gm16381	0.20794	0.207862	7.16496	274.115	78.3097	1.58936	0.945472
Gm16880	1.74429	0.603945	0.673229	5.3155	4.13202	0.0482662	0.767498
Gm16973	0.356388	0.653245	0.206282	5.52366	1.13273	0.487319	0.863806
Gm17026	0.895701	1.38329	2.34484	6.89015	0.0394757	0	0.405048
Gm1821	129.459	221.98	293.075	539.413	641.574	560.381	1400.51
Gm1943	28.3011	7.88769	4.96599	75.6068	172.468	95.4575	21.5807
Gm19583	3.73948	20.5998	24.8829	11.9323	0.079926	1.17882	0.64535
Gm19705	0.985922	1.18455	1.86175	7.30391	0.75749	3.36056	2.33779
Gm1995	0.318161	0.653914	3.74954	35.7898	37.2394	2.7107	0.0631016
Gm2016	0	0	18.3953	107.699	5.4058	0.369081	0.710429
Gm2022	0.0198874	0	8.07109	33.6708	0.736656	0.033142	0.0518584
Gm20337	1.43172	2.41846	2.65505	7.94716	4.26381	4.38296	1.89742
Gm20765	4.59933e-05	5.11286e-05	17.8474	91.8363	3.43574e-05	3.45331e-05	3.42347e-05
Gm20765	4.59933e-05	5.11286e-05	17.8474	91.8363	3.43574e-05	3.45331e-05	3.42347e-05
Gm21304	0.220302	2.97948	71.1386	187.765	2.53896	0.0590828	0.487672
Gm21312	2.29959e-05	2.44238e-05	6.23724	36.465	1.68434e-05	1.72665e-05	1.71178e-05
Gm21319	0	0	6.03443	42.6214	0.819183	0.0529553	0.100422
Gm2694	10.5892	11.4557	15.7278	54.5578	35.255	3.87162	8.63126
Gm2a	0.153535	0.188402	1.10391	37.1536	62.4012	178.977	31.4204
Gm3139	0.924611	1.94235	1.61405	79.0652	94.9372	165.601	4.12105
Gm3219	40.4244	26.5509	78.6837	89.769	12.3199	3.18553	5.35593
Gm3258	16.2984	44.2259	47.6861	316.635	579.391	511.585	139.897
Gm3286	13.7543	56.1306	29.6345	34.3811	33.5865	30.6045	0.259895
Gm3286	13.7543	56.1306	29.6345	34.3811	33.5865	30.6045	0.259895
Gm3286	13.7543	56.1306	29.6345	34.3811	33.5865	30.6045	0.259895
Gm3286	13.7543	56.1306	29.6345	34.3811	33.5865	30.6045	0.259895
Gm3604	0.556006	1.16449	0.996525	8.68945	5.0869	5.50199	17.0119
Gm4027	0	0.0424685	49.4094	180.341	1.52558	0.0173196	0.178145
Gm428	3.4438	1.54103	16.8075	55.1379	6.85766	5.76624e-06	5.98258e-06
Gm4301	0.193886	1.61847	53.3567	20.5446	0.325038	0.010137	0.0527204
Gm4302	6.01322e-06	2.09602	45.4805	71.9393	1.17898	0.0892102	0.0214179
Gm4307	1.27456	2.11815	110.479	68.8587	0.654923	0.0460293	0.413615
Gm4307	1.27456	2.11815	110.479	68.8587	0.654923	0.0460293	0.413615
Gm4312	0.193886	1.35225	48.0033	18.9378	0.296608	0.010137	0.0527204
Gm4312	0.193886	1.35225	48.0033	18.9378	0.296608	0.010137	0.0527204
Gm4340	5.68775e-07	0.480427	11.3902	37.999	0.194974	3.90011e-07	3.31806e-21
Gm4349	18.4639	12.8637	8.13673	17.7096	16.5342	8.47713	5.08966
Gm4567	1.92594	3.4928	1.87149	20.0194	0.252979	0.188952	0.167748
Gm4567	1.92594	3.4928	1.87149	20.0194	0.252979	0.188952	0.167748
Gm4567	1.92594	3.4928	1.87149	20.0194	0.252979	0.188952	0.167748
Gm4827	0	0	0.4348	7.87797	0.340692	0	0.431595
Gm4850	0.78253	0.221289	5.78557	206.572	47.6083	0.354794	0.0708562
Gm4858	0	0	1.27122	13.575	5.01267	0.795045	0.0566836
Gm4926	2.42866	4.21319	4.43623	7.25199	0.418566	0.0327805	1.03916
Gm4971	0	0.703547	16.3624	76.2711	24.7818	1.23833	0.0560342
Gm5	3.40161	23.2306	20.3618	155.861	131.239	32.433	0.53064
Gm5039	0.360885	1.92183	33.3506	127.447	0.946311	0.0806604	0.239691
Gm5128	0	0.0868264	0.121063	5.27176	4.00358	0.334473	0.00601302
Gm5128	0	0.0868264	0.121063	5.27176	4.00358	0.334473	0.00601302
Gm5148	0.395553	1.48341	3.75814	81.2772	225.602	532.841	721.414
Gm5150	0	0.110826	0.381843	5.17283	0.140258	0	0
Gm5512	1.20629	4.17131	5.04428	8.86472	9.20734	1.60502	5.0318
Gm5512	1.20629	4.17131	5.04428	8.86472	9.20734	1.60502	5.0318
Gm5538	0	0	0	8.99612	0.637587	0	0
Gm5634	0	0	0.0914905	18.4572	7.73712	4.06123	0.951787
Gm5635	0	0.3142	0.120983	30.9942	18.8574	3.33305	3.25028
Gm5662	0	0.110006	30.1785	166.865	5.84094	0.604694	1.20024
Gm5801	0.338943	0.822062	2.54693	8.23625	13.5448	8.72415	4.77321
Gm5801	0.338943	0.822062	2.54693	8.23625	13.5448	8.72415	4.77321
Gm6083	4.27646	5.43066	3.37427	18.9457	20.9637	53.1237	362.491
Gm6251	2.02569	3.96582	3.87066	12.6515	41.5933	149.587	116.723
Gm6402	0	0	3.00803	19.7641	4.98274	7.3661	7.2486
Gm6406	1.94152	4.56317	5.78748	13.7813	1.49927	1.23115	0
Gm6432	0	0	0.511425	8.45102	5.08107	42.5617	6.41653
Gm6548	2.5415	6.19535	6.55477	7.30227	13.2195	53.5757	105.175
Gm6568	0.443021	1.2251	3.06982	51.1527	79.8904	25.8577	3.21003
Gm6654	5.18798	4.38684	3.11617	54.4943	143.827	270.689	348.841
Gm6682	10.5168	13.1301	5.81764	25.4118	18.6525	37.6215	133.921
Gm6763	0.154566	3.13907	86.8049	236.489	2.78064	0.0591204	0.534717
Gm6880	0	0	1.60253	23.5782	50.1614	19.2351	5.71431
Gm6890	0	0	0.289518	5.65647	2.99882	2.02122	0
Gm6902	3.64302	5.97025	18.2104	245.872	13.1292	0.389404	0.102735
Gm6902	3.64302	5.97025	18.2104	245.872	13.1292	0.389404	0.102735
Gm6902	3.64302	5.97025	18.2104	245.872	13.1292	0.389404	0.102735
Gm7102	0	0.256124	3.7632	47.4615	11.0453	4.1995	2.78419
Gm7104	3.49786	6.78609	5.39848	11.9176	10.0939	0.500483	0.0108876
Gm7120	4.38952	6.70208	7.67704	15.9372	15.6599	40.0349	0
Gm7788	0	0	0	18.702	0	0	0
Gm7861	2.54332e-10	1.08013	0.398212	7.01043	3.76315	1.28362	0.795194
Gm7861	2.54332e-10	1.08013	0.398212	7.01043	3.76315	1.28362	0.795194
Gm8300	0	0.129401	28.3897	148.994	6.35417	0.126039	0.412717
Gm8615	0.120135	0.326502	0.428193	5.80443	11.2534	25.0469	24.0058
Gm8764	0.309132	5.87461	159.015	423.054	5.32646	0.118241	1.06943
Gm8994	3.61037	3.51649	57.5033	127.185	34.083	39.081	13.2508
Gm9	0	0.0497571	1.05889	26.5175	31.8266	4.03103	0.157183
Gm9125	0.219523	0.0753196	2.78162	50.0173	25.1557	1.76742	0.0245865
Gm9125	0.219523	0.0753196	2.78162	50.0173	25.1557	1.76742	0.0245865
Gm9895	0	0.748057	5.11479	14.3466	4.79009	0.844645	0.365175
Gm9994	1.28627	1.37859	1.66897	19.0343	2.14858	0.0849967	0.0731131
Gmeb2	0.0485852	0.0722753	0.139164	5.41429	3.22082	2.11497	1.59847
Gmnn	281.066	243.023	288.807	582.001	507.978	352.963	204.359
Gna11	0.204916	0	0.630649	8.71387	5.00901	3.33433	3.66429
Gna14	7.67891	44.2612	48.1676	27.0938	3.4956	0.545512	3.82795
Gnl1	0.694965	0.665564	1.16911	9.24759	9.20097	7.13316	13.4347
Gnl2	49.6208	51.3362	5.66317	42.2539	97.8159	112.079	60.419
Gnl3	24.1897	31.3025	13.512	41.937	205.583	239.28	129.454
Gnl3l	0.200553	0.48849	0.181321	8.28354	16.6532	22.5516	19.225
Gnpda1	0.31823	0.864303	0.748796	8.01244	17.3777	31.553	38.6239
Golph3	32.6367	41.9953	138.922	89.3616	17.8329	16.6059	16.4579
Golt1b	6.00328	9.6124	9.81278	48.5966	84.8457	50.1938	72.0494
Gorasp1	0.020461	2.30521e-10	1.77682e-10	9.80613	26.1093	45.7562	5.21087
Gosr1	3.36246	2.32405	2.09891	5.13199	8.16243	13.283	10.6818
Got1	12.6885	24.58	20.7486	36.9103	22.3365	40.5628	175.25
Gpank1	5.56209	7.87385	6.72577	33.0938	50.6497	26.9257	15.4521
Gpatch3	0.106703	0.159248	1.2265	15.7523	8.61579	3.66658	7.26592
Gpatch4	8.14878	4.29123	2.31359	9.24594	37.0548	26.7823	20.8603
Gpbp1	86.9756	169.817	206.13	365.258	577.2	78.0316	81.6535
Gpbp1l1	6.84609	8.42048	10.4832	16.5501	15.8965	16.3219	6.50252
Gpkow	0.129846	0.828147	0.520335	14.1568	38.005	35.9111	11.2882
Gpn1	4.46144	13.3029	7.20769	60.0278	95.1751	47.9694	39.0835
Gpn3	1.04161	1.29281	1.95893	133.165	328.773	253.926	69.1537
Gpr137b	6.21577	27.5311	28.771	37.6945	88.4608	152.495	8.62419
Gpr137b-ps	13.2896	47.8245	55.0959	42.1412	56.2305	82.3054	7.12028
Gpr160	0.86927	0.788041	1.03169	9.67286	11.3176	9.72473	4.22332
Gpr161	0	0	0.200738	12.0082	19.6472	34.5784	6.06362
Gpr19	2.0268	9.07055	7.91876	13.7683	5.28731	2.43533	16.1391
Gpr50	6.43236	2.84613	9.70574	80.8616	18.6798	4.32104	0.399193
Gpr89	2.85065	10.0445	12.7309	8.28036	10.9988	15.1578	20.3535
Gprc5a	1.67621	1.30158	1.5673	5.16978	5.793	71.7477	22.7502
Gps2	9.90114	13.0566	7.40059	30.279	35.0746	59.9183	15.977
Gpsm2	2.7437	3.35845	3.90335	7.81886	8.2116	7.88921	4.6853
Gpx1	6.30275	8.20249	12.967	96.7322	216.114	397.504	906.859
Gpx4	2.00683	1.33987	1.54579	28.3175	48.6788	81.9753	94.409
Gpx7	0	0.297006	0.331079	17.3218	8.26659	0.996812	7.64102
Grb2	0.341313	0.46947	0.975313	8.73914	16.1776	22.2527	3.32192
Grcc10	8.83424	10.7158	7.94315	19.0664	9.54164	7.58835	93.2789
Grhl2	0.601557	1.25412	1.60788	11.681	16.596	10.3311	4.21468
Gripap1	1.21211	1.05734	1.0274	12.7467	13.7383	4.88663	3.07684
Grsf1	5.62075	9.5058	8.85781	31.5994	32.0606	4.85568	15.0154
Grwd1	2.34352	3.63995	3.80881	49.5447	125.732	181.08	80.0515
Gsg2	19.6663	34.4139	43.5571	46.7894	55.292	9.79474	9.26451
Gskip	1.0737	0.436208	0.790172	11.554	23.2542	13.0699	1.55972
Gsr	0.7927	0.685783	1.7606	5.46101	16.243	34.1866	20.2694
Gss	0.291354	0.9759	1.61136	14.7232	7.83752	3.67883	18.7026
Gstm5	34.8275	112.654	140.847	119.47	11.3285	1.14099	0.213642
Gsto1	0.280084	1.57665	1.11842	18.0444	17.4175	299.782	305.001
Gt(ROSA)26Sor	6.12349e-09	0.0840153	2.58486	65.2648	74.2392	13.1735	14.6158
Gtf2e1	9.70323	10.689	6.39477	23.3662	18.4306	17.9474	20.5649
Gtf2e2	11.4663	39.9362	26.2428	38.2911	53.9462	56.5563	85.4391
Gtf2f1	38.6948	49.5082	16.242	130.844	194.776	137.229	74.9969
Gtf2f2	32.8691	60.3947	49.534	102.232	252.847	101.531	73.5368
Gtf2h1	39.0799	39.4036	22.0764	60.2145	94.3009	81.9644	73.5731
Gtf2h4	1.44164	2.05656	1.19092	13.2657	35.7024	47.3966	41.3084
Gtf2h5	28.1745	20.3126	10.687	99.1685	219.98	226.087	119.38
Gtf2i	0.180548	0.0839124	0.318816	9.24125	10.7064	9.72495	6.72163
Gtf3a	16.961	35.1587	33.539	40.3549	45.1335	28.8994	26.2122
Gtf3c1	13.7744	9.82787	4.06957	11.7469	27.7604	12.4583	6.45285
Gtf3c4	0.235201	0.198484	0.420898	7.4411	12.4111	8.47522	8.07427
Gtf3c5	0.121085	0.514065	0.394827	25.0506	40.9664	10.2534	5.3731
Gtf3c6	3.34314	7.82788	6.57542	76.2284	77.5508	35.6949	46.1358
Gtpbp3	0.169862	0.325322	0.120884	12.2357	9.03047	3.5037	6.30596
Gtpbp4	58.9576	40.5039	25.2801	100.697	171.823	117.75	112.69
Gtsf1l	0	0.585762	0.759793	14.8346	17.1424	10.0735	42.0744
Guca1a	0	0	8.6284	327.534	433.144	148.838	7.60783
Guk1	2.55735	3.38122	5.04134	11.1206	35.0145	108.936	85.4287
Gulo	1.11043	7.62418	5.63569	7.45125	22.0765	241.145	13.8919
H2afj	3.21127	3.59692	3.20409	22.4135	38.9277	48.615	16.7577
H2afv	5.773	6.62472	9.83266	89.4827	122.657	104.687	58.1715
H2afx	14.1435	14.0946	15.1273	34.1065	37.5386	284.277	205.152
H2afz	3.44561	4.07593	8.67841	116.061	137.991	161.221	556.68
H2-Bl	0	0	0.819975	6.93147	3.48605	1.83373	0.266401
H2-D1	0	0.0944486	1.2255	9.912	5.9693	6.81658	9.76344
H2-K1	4.22474	4.43401	2.41009	21.0584	8.49744	6.25033	5.07825
H2-Q10	0	0	0.123069	6.54701	11.2429	2.4703	0.0122007
H2-Q5	0	0	0.0208186	5.91279	5.18081	1.74056	0
H2-Q7	0	0	0.277733	20.0688	43.197	18.3601	0.00421377
H2-Q8	0	0	2.50458e-05	23.2626	43.3159	5.49799	3.77369e-05
H2-T22	0	6.66467e-06	0.118659	6.33025	3.61459	1.35985	3.9317e-06
H3f3a	41.9096	312.86	203.679	270.811	592.39	748.87	320.137
Hadhb	1.54258	2.78571	1.92443	5.12423	6.87609	7.20586	9.92775
Hagh	0.676914	3.58011	1.97611	21.2638	13.3641	1.75332	35.7028
Hamp	14.6851	0	2.66212	5.96059	0	0	18.5736
Hars	13.7886	10.7983	3.58799	33.2119	83.6824	77.5798	84.5171
Hars2	0	0.0245368	0.0795701	10.1728	19.626	11.276	7.29976
Hat1	50.1743	40.9026	17.697	36.5624	89.1171	167.984	217.014
Haus1	0.42728	3.95491	6.94683	22.601	11.4787	36.3607	148.362
Haus2	0.765733	0.546141	0.876914	19.4851	39.709	55.9988	22.7681
Haus3	103.811	96.2277	22.6733	77.999	145.731	43.559	22.0122
Haus6	12.0273	14.2509	16.4849	77.8475	124.748	50.682	29.9293
Haus7	6.79641	19.9447	9.21108	19.3646	22.1327	12.415	30.6958
Hba-a1	0	0	3.56098	23.6162	63.3036	18.7909	0
Hba-a1	0	0	3.56098	23.6162	63.3036	18.7909	0
Hbegf	2.39575	0.947372	1.57584	13.9187	3.06136	0	1.6861
Hbp1	31.6136	42.9221	22.7665	67.426	134.067	83.4286	23.2085
Hccs	1.22298	0.488371	2.3624	22.6129	16.5974	14.1951	5.02066
Hck	0	0.491824	0.920149	7.04824	2.74403	0.795582	1.16816
Hcrt	0	0	0.388179	15.7558	29.8147	53.4975	0.472296
Hdac1	0	0.162301	0.847049	15.4879	49.3293	65.8201	33.9623
Hdac6	4.70474	4.34277	4.072	11.2109	9.22395	8.08302	15.1074
Hdgf	23.3916	13.9415	7.123	32.6278	57.0259	79.07	30.3766
Hdgfrp2	0.49705	2.3975	1.26059	8.88605	13.5392	16.1629	39.7493
Heatr3	2.93069	2.89041	2.47889	23.6294	70.2967	70.8898	45.3425
Hectd1	10.3865	2.47937	1.00979	7.28457	14.4352	4.70023	5.29573
Herc4	1.79627	1.5851	1.66174	12.8351	22.9045	28.796	23.9984
Hesx1	0	0.162196	0.690338	22.8025	6.00044	1.50438	13.7498
Hexb	0.301828	0.126737	0.993233	142.64	353.416	275.044	65.9063
Hexim1	0.0195818	0.0437196	0.992448	6.05221	4.7851	1.58581	1.41384
Hiat1	41.9309	46.4917	51.0981	164.343	432.667	178.919	67.8587
Hic2	4.07629	2.52403	2.91485	16.2285	12.9552	4.34336	7.80785
Higd2a	69.8805	131.648	200.174	214.97	142.923	192.896	282.818
Hilpda	8.86762	8.12991	6.10856	41.7276	31.6876	28.3295	17.9342
Hinfp	4.74603	10.3953	3.66422	28.5339	54.5997	32.3413	10.7867
Hint1	10.0537	131.308	33.4601	122.94	293.606	389.048	1272.88
Hint3	0.301117	0.515528	0.139284	8.05794	13.5061	30.4058	45.8548
Hipk1	0.133386	0.283766	0.439296	47.2831	31.8281	6.47664	5.28656
Hipk3	1.19124	0.969618	0.813149	12.5284	14.3719	14.0547	5.33862
Hira	1.06196	1.40854	0.778598	6.0628	9.41921	6.02171	1.61612
Hist1h2ab	0.66883	0.973226	3.96706	24.8294	38.735	209.723	234.507
Hist1h2ac	1.53652	5.60496	5.61288	25.4607	36.1919	189.75	224.133
Hist1h2ad	0.337917	1.55524	7.49978	47.2466	76.2678	415.302	410.346
Hist1h2ae	0.309004	0.642624	2.43431	15.2533	25.0985	146.699	198.042
Hist1h2af	0.173232	1.38217	8.29837	52.114	87.8571	473.21	455.067
Hist1h2ag	1.99508	5.66962	11.6998	76.4041	137.259	730.972	762.035
Hist1h2ah	0.587319	1.62006	7.80673	48.2258	76.5984	422.064	419.131
Hist1h2ai	0.519522	3.27423	9.87992	59.3881	95.0575	509.166	536.566
Hist1h2an	0.388625	2.38636	10.2847	66.2509	108.671	589.165	587.316
Hist1h2ao	1.97544	4.22967	11.0381	75.3618	117.626	659.725	642.825
Hist1h2ao	1.97544	4.22967	11.0381	75.3618	117.626	659.725	642.825
Hist1h2ba	5.23941	90.8798	14.722	14.9897	0.567393	0.0644248	2.97333
Hist1h2bj	4.11776	25.0184	16.0793	11.8091	5.56397	4.99564	32.3863
Hist1h3f	3.03412	7.33895	6.1199	9.98864	2.12254	1.08549	7.11658
Hist1h4c	5.04189	34.93	33.4997	44.9458	8.58865	9.37408	16.0482
Hist1h4d	10.7986	2.65457	12.1406	28.594	39.3748	174.426	199.177
Hist1h4h	0.942093	9.26453	5.66273	5.15488	2.35019	1.45626	10.1118
Hist1h4i	0.749361	11.6263	9.73456	20.6148	20.6996	2.88848	43.2681
Hist1h4j	1.91381	16.973	10.9551	11.5692	3.54005	4.88752	22.1382
Hist2h2aa1	5.63429	75.2573	47.2585	28.3815	2.21353	4.89983	9.34248
Hist2h2aa1	5.63429	75.2573	47.2585	28.3815	2.21353	4.89983	9.34248
Hist4h4	2.02943	20.7417	14.9476	18.9187	3.10689	2.15421	8.61559
Hmbs	1.49335	1.98866	3.1881	30.2447	38.4794	33.9176	68.3217
Hmgb2	33.0413	25.2467	13.1917	45.3513	75.6412	73.3926	70.4347
Hmgb3	39.514	36.4127	33.3421	112.828	177.045	137.31	19.5022
Hmgcl	0.43427	0.243811	1.13655	33.3308	42.9866	35.6315	32.2546
Hmgn2	3.64235	1.50207	1.42486	35.9851	58.1196	96.1764	60.9872
Hmgn3	1.51153	1.8857	4.56402	6.52077	2.41733	0	0
Hmgn5	4.55949	4.05054	4.77184	29.1267	16.3684	4.59948	50.7382
Hmmr	1.26023	2.78425	2.78168	24.1684	28.9543	28.3227	14.1183
Hmox1	0.142182	2.12619	5.03114	11.6668	3.46517	3.4257	11.5277
Hmox2	6.92378	19.4484	8.82779	50.8103	124.495	55.5607	36.6043
Hn1	11.0172	94.6837	74.0576	277.897	461.683	351.904	165.151
Hnrnpa3	4.29048	4.6213	5.16631	10.959	7.18391	5.68649	8.85879
Hnrnpab	3.18343	2.53499	2.99772	27.0177	37.4713	36.6593	17.8081
Hnrnph2	11.4256	17.5378	11.3959	26.0528	51.8092	71.4815	39.3814
Hnrnpm	8.68259	8.26367	6.70581	34.6073	110.777	124.065	121.841
Hnrnpr	4.26952	3.62874	3.28591	8.52381	10.9399	7.85501	13.873
Hormad1	0.129655	0.178834	2.55541	49.2447	67.733	36.4281	3.778
Hpd	0.170452	0.957375	1.6946	7.89506	3.38652	1.18217	0
Hpdl	0.13936	0.260459	0.992439	36.702	68.7382	79.5016	9.15411
Hps6	1.79741	4.52606	1.58242	8.99622	15.3819	10.4105	4.09126
Hrsp12	3.38024	13.6018	7.51657	10.5291	3.64555	6.89545	31.8684
Hsd17b14	0.0567115	0	0.0258231	41.5337	60.4415	112.677	3.2702
Hsd17b6	0	0.117059	0.158169	6.43187	23.6252	9.32259	2.83437
Hsp90b1	95.5975	101.499	34.4439	93.9443	86.3815	35.7459	311.271
Hspa1a	0.0728562	0.596902	1.2318	10.1652	8.71879	1.19187	0.0255853
Hspa2	1.96494	2.18262	6.0595	19.3144	4.80173	5.38172	3.37753
Hspa4	1.7497	2.18559	2.10099	14.0727	34.62	49.7209	48.7904
Hspa5	33.4133	117.002	40.6105	230.363	501.587	138.708	416.474
Hspa8	9.18564	39.0463	11.0444	61.4866	259.595	1353.55	1002.61
Hspb1	3.88349	4.73212	8.63164	54.4174	15.0479	9.03377	22.0888
Hspb11	16.8288	16.3065	16.0514	59.6748	17.8159	30.9499	21.2038
Hspbp1	0.508803	0.285493	0.277743	32.8351	68.19	113.678	47.7682
Hsph1	40.5704	32.3043	8.31507	32.4598	54.8471	27.5889	250.972
Htatsf1	12.5245	9.1079	14.4045	25.2367	29.1485	18.0153	19.1245
Htra1	4.66788	55.2185	48.0169	11.6092	1.21909	1.1181	4.42324
Hypk	338.202	282.425	541.685	737.388	422.765	506.354	541.756
Iah1	0.0959656	0.651103	0.967715	15.7767	31.1291	16.8387	54.8393
Icam1	0	0	0.552219	14.1287	7.5433	5.43656	6.3419
Ict1	2.20204	15.2034	9.75154	16.7554	71.8634	147.189	102.655
Id1	0.18954	2.03573	4.25617	26.8241	5.01408	6.11362	2.67386
Id2	0.931381	2.93211	17.7715	29.5836	15.8405	0.981462	36.4615
Id3	1.5648	0.936153	3.24655	6.53202	12.9192	296.212	166.284
Idh2	0	0	0.098108	5.303	29.591	56.5469	131.451
Idh3b	4.08826	4.44788	1.9382	29.1477	48.4852	130.478	179.285
Idh3g	1.93271	7.93006	3.60129	39.4733	69.9625	173.798	209.681
Ier2	0.346319	0.222029	2.27252	11.8052	7.03102	7.08527	66.9975
Ier3	0	0.171869	3.34403	10.7772	0.541561	0.604915	6.29394
Ier3ip1	0.220878	0.372079	3.0919	26.9276	23.0259	22.7706	67.2577
Ifi30	1.41088	3.48535	4.31907	18.6942	13.5229	37.0528	50.6051
Ifi35	0	0	0.233506	62.8635	100.621	32.3776	5.92268
Ifnar1	0.706338	1.47333	2.02487	5.84014	10.4051	1.54487	4.27575
Ift20	97.1001	59.2711	23.1193	144.725	170.739	75.8993	53.0081
Ift52	2.25889	11.5593	11.1291	14.9721	23.8339	3.81309	17.0521
Ikbip	0.353908	0.780162	0.728648	7.33363	4.88239	2.76692	1.24937
Ikzf5	0.534654	1.62347	1.4505	8.60353	5.82187	2.53942	5.08091
Il6ra	0.159581	0.200426	0.225681	5.5109	1.97227	1.71479	1.60829
Ilf2	29.197	31.1762	25.7404	95.3732	211.825	127.023	109.393
Imp3	35.0814	67.9412	73.7455	323.959	375.822	237.631	142.165
Imp4	22.8099	59.0889	48.8327	74.6266	162.211	129.543	88.5501
Impa2	4.17174	3.93566	2.81084	12.3876	13.7264	10.4126	38.8636
Impdh1	0.226977	0.47579	0.450022	24.2114	95.0265	149.284	36.3151
Impdh2	0	0.204745	0.352727	9.44973	55.2006	129.726	19.9705
Ing1	199.585	60.357	21.9547	58.2691	58.9438	26.9165	14.2884
Ing4	0.780769	2.57488	2.49455	16.9754	31.7874	41.4693	17.598
Ino80c	3.14884	4.60686	3.60815	24.8936	33.5722	31.6813	27.8246
Ino80e	10.2743	23.3685	19.6034	30.1569	28.0827	45.4985	65.8729
Inpp1	0.657006	0.644073	0.205135	6.21666	0.288038	0.11735	0.14521
Inpp5b	4.28293	9.46214	12.5388	9.8781	7.87881	3.48296	3.56905
Ints2	2.58368	1.63883	1.49473	9.07817	16.7395	12.4311	6.46708
Ints3	14.8127	13.2041	8.57243	17.2386	16.4243	28.1972	21.8011
Ints5	2.16923	2.60294	3.14705	14.6858	12.9175	11.6819	19.4679
Ints7	0.287852	0.39026	0.269865	12.706	26.6696	36.6099	18.8452
Ints9	152.908	51.2494	4.85073	13.2692	15.0871	17.9469	12.3008
Ipo11	1.51009	2.04187	2.06925	12.3894	45.5149	52.3094	25.5664
Ipo4	4.8043	3.88853	3.25623	15.4286	46.9079	91.6164	54.4602
Ipo5	16.0963	16.098	14.6505	53.0608	157.053	317.11	74.0119
Ipo7	2.28359	2.6824	1.78461	16.5688	46.7543	115.427	69.1407
Ipo9	3.95238	8.26844	8.34348	10.3961	7.92249	4.22654	18.4042
Iqcf1	1.06986	1.84043	8.61398	51.4077	32.8076	4.7541	0.534049
Iqcf5	3.85301	49.1266	34.7185	22.7038	21.8088	1.44363	0.367978
Iqcg	2.41432	4.37529	4.10435	13.1929	24.509	11.7681	1.42084
Iqub	0.144949	0.121329	0.180335	16.3092	27.6739	5.86699	0.190399
Irak2	0.0220502	0.197007	0.180263	8.23163	9.64797	12.0039	6.80758
Irf1	10.5079	43.8	10.8265	31.5401	6.20902	0.352539	0.594724
Irf3	0.256648	1.21882	0.984365	5.67656	9.82459	2.76912	9.71298
Irgq	0.0208719	0	0.070729	6.6913	10.0161	4.23767	0.473717
Isca1	10.1989	38.2893	42.5293	25.8337	18.7954	15.3623	22.102
Isca2	0.21125	0.119636	1.30933	13.8984	21.8343	23.6883	20.9705
Iscu	5.93069	3.12527	10.9556	12.2649	9.60292	20.9432	14.7185
Isg20l2	0	0	0.497965	13.2973	35.6083	16.6886	9.00249
Isoc2b	0.865859	5.325	6.54742	7.10382	7.58206	9.65735	3.45006
Ist1	18.2425	18.3908	14.0999	71.3275	154.171	98.8132	55.6423
Isyna1	2.08625	6.1283	4.04792	24.1812	185.324	1321.93	349.117
Itch	5.40304	7.27512	7.91378	10.8973	15.5392	36.5644	13.788
Itgae	0.0515188	0.114978	0.51301	6.71015	7.09911	2.38993	0.349554
Itgb5	1.09915	0.550768	0.746173	5.84934	17.7096	10.8035	1.41301
Itpa	2.0119	2.60754	0.923516	11.8456	31.5267	45.961	32.1578
Itpkc	0	0	0.11297	10.9845	15.4429	5.0106	3.22388
Ivns1abp	10.0047	9.94252	9.07156	27.8792	93.1195	205.539	152.916
Iws1	5.58018	7.23656	4.34421	11.7385	19.7469	11.4764	5.51044
Jade3	0.0266116	0.118706	0.15222	5.94046	2.03505	3.9634	14.2851
Jak2	17.5366	24.8698	26.7875	46.3296	22.1487	1.01446	0.381839
Jmjd6	34.6065	53.9128	38.0309	78.2123	96.9287	85.2628	17.7899
Jtb	4.20153	12.8501	16.4488	36.2459	32.03	123.414	59.7189
Kank4os	0.261318	0.519431	1.64497	7.45155	3.85343	1.15797	2.69717
Kansl2	5.87537	4.7721	6.02605	11.829	17.1237	15.4701	14.7334
Kansl3	3.55061	3.95214	4.7023	9.29998	24.83	17.5555	7.51269
Kars	44.3306	53.4258	51.7375	92.2498	164.03	185.455	125.517
Kat2a	3.61444	7.75071	4.96339	21.1429	23.5454	30.3364	46.9201
Kat8	9.97467	29.7997	18.9249	20.3341	26.1154	52.1488	7.59907
Katna1	67.7218	71.413	46.3693	147.721	178.929	47.2451	59.9695
Katnb1	0.699321	2.47207	2.50521	5.3273	2.73169	4.3122	9.27263
Kbtbd2	0.0680771	0.018991	0.13087	5.0424	11.1634	7.38814	11.9117
Kcnk5	0.534904	0.309635	0.475162	6.21548	30.031	59.6475	9.12492
Kctd18	7.85486	6.35001	2.59662	11.8247	29.876	13.1694	10.3462
Kctd20	17.1777	20.723	17.7034	34.6353	42.4028	33.7997	33.5713
Kctd3	13.248	18.2795	24.0497	29.8615	6.54233	1.78635	1.99974
Kctd6	0.134633	0.201246	0.897343	7.60985	1.7022	0.577722	1.49416
Kctd9	3.74313	3.10301	2.29491	9.43122	4.99398	3.40324	3.30663
Kdf1	2.44262	1.0854	0.707787	10.058	7.53861	0.993199	5.48295
Kdm3a	1.34116	1.52102	1.70666	13.2062	15.7954	15.9465	31.2548
Kdm4c	0.0156005	0.154108	0.291526	20.6882	42.1434	21.6476	8.0827
Kdm5a	0.191411	0.365789	0.316795	7.53493	19.2323	8.43447	6.33256
Kdm5b	0.739508	1.05005	2.25413	45.7081	68.9143	55.4457	23.2332
Keap1	4.31532	2.21064	1.20722	6.62522	1.33459	3.99551	3.76665
Khdc1a	10.1702	22.2309	20.9103	27.0092	19.0212	24.0738	0.829203
Khdc1c	22.3829	57.2191	41.7025	59.9634	60.9418	71.5585	1.84603
Khdrbs1	5.69854	2.60469	8.4962	55.4448	44.3845	31.6852	23.7027
Khsrp	5.48357	4.74438	6.82401	12.0988	16.5324	12.8535	14.0338
Kif11	12.4022	15.6749	6.86759	20.9882	42.8787	33.7729	22.6596
Kif18b	1.01967	3.63831	2.55608	13.3615	37.8661	16.7898	9.20954
Kif22	34.086	77.8284	27.7393	100.092	282.023	226.621	39.5384
Kif2a	8.34854	9.19777	11.1434	25.1777	14.794	4.35426	5.28682
Kif2c	15.8423	35.526	8.47546	56.1112	92.6328	20.1411	21.2826
Kif3c	0.0185642	0.152422	0.300329	13.4528	24.8461	5.39441	0.357991
Kif5b	12.7	8.59536	5.95247	22.2771	23.3099	38.5964	46.9115
Kifc2	0	0.0715116	0.096627	5.42507	2.76595	0.515832	2.39596
Kin	17.4475	15.7611	5.84937	59.4252	96.347	28.651	14.4224
Klb	0.23207	0.259056	0.665075	8.64462	4.05227	4.09372	1.21996
Klc4	1.79875	3.01726	2.14718	8.26387	14.7994	26.9614	9.01562
Klf10	6.73772	5.43444	3.05019	10.3825	13.3939	35.2557	11.2838
Klf16	3.99708	8.18417	6.79863	12.5741	17.4524	3.59646	5.09263
Klf5	0	0	0.752337	9.9448	11.0719	76.2134	34.9211
Klhdc4	0.373772	2.01526	1.59528	15.7212	31.483	49.2491	37.0524
Klhl11	1.67474	1.39631	3.79482	65.0611	57.9912	14.1987	7.52882
Klhl21	0.405402	0.320421	0.076404	5.29554	9.42261	3.84913	2.27093
Klhl22	5.55997	6.52064	4.33226	8.70019	5.13951	2.7929	5.86672
Klhl7	0.0601181	0.476761	0.202045	19.8149	33.5972	6.10905	3.37465
Klrg2	0.122327	0.136809	0.180236	7.66849	1.83807	4.13978	0.366098
Knop1	0.867664	1.2178	1.04095	14.6885	33.0849	32.3015	25.8259
Kpna1	0	0.109229	1.29142	72.8482	107.5	81.7129	66.7827
Kpna2	16.3121	102.868	35.3179	73.7685	157.264	82.5758	24.9403
Kpna6	2.24625	3.76444	2.26358	6.63531	11.9493	3.0331	11.7885
Kpnb1	5.46645	8.50909	5.4224	16.9723	21.1102	17.5898	28.6492
Krr1	7.11221	15.4735	10.3342	21.0877	38.985	40.0589	23.5201
Krt28	0	0.114101	0.416263	6.50935	17.3551	6.62772	0.324922
Krtcap2	0	2.52024	3.04666	10.902	28.311	186.453	199.073
Kti12	8.76214	11.8805	12.8496	119.309	155.632	85.981	45.7278
Kxd1	8.95618	9.26114	17.2385	22.4114	25.5837	65.2658	58.7646
L1td1	0	0	0.135179	13.0576	5.34654	0.244938	26.1971
L2hgdh	0.159843	0.401512	0.424978	32.6031	91.1687	88.6373	17.2582
L3mbtl2	18.8238	14.1142	4.01965	24.7425	43.9281	25.1589	22.7371
l7Rn6	7.06172	24.0706	10.2282	64.5116	160.087	269.552	263.286
Lage3	0.90991	4.73093	5.87266	55.5016	49.3205	32.4367	60.7168
Lamp2	8.72216	5.51198	7.03763	126.82	309.32	318.578	36.5996
Lamtor1	5.85346	23.5172	27.7443	46.2159	55.215	84.2468	44.1095
Lamtor4	3.01601	15.427	8.01944	10.2239	11.3398	31.2866	61.1835
Lap3	5.53111	4.51471	3.55539	17.8832	44.4524	34.7879	297.272
Larp1b	0.344542	0.772283	1.01741	32.6993	63.7431	37.0667	1.4633
Larp4	13.9277	14.8325	12.839	50.7018	175.203	273.781	25.6485
Larp7	41.9744	38.3091	19.6715	48.0911	58.9117	53.946	77.0908
Lars2	131.577	69.1284	146.419	265.533	278.323	151.834	177.316
Las1l	16.4536	15.2575	4.17533	19.3718	36.5762	35.892	29.8398
Lbhd1	2.90149e-10	5.41009e-19	0.227449	7.62368	42.1575	12.6672	5.32971e-11
Lbp	0.79037	3.35102	3.96397	6.27882	0.532704	0.194003	0
Lbr	55.7452	14.3813	5.51149	38.7117	93.6797	140.93	37.4159
Lbx2	0.927047	1.57778	1.17249	7.48696	9.85104	1.94296	0.0845937
Lclat1	8.87226	13.5659	7.69099	38.0442	90.35	76.0845	4.90921
Lcmt2	0.932506	1.12512	1.61387	8.29535	16.0793	3.93058	7.92814
Lctl	0.226717	0.508835	0.465585	15.1432	23.8352	12.7076	0.0931283
Ldha	0	2.15315	4.6963	31.6143	6.31062	0.523292	15.3417
Ldhc	1.13572	2.28414	2.28748	15.403	23.8401	2.83274	1.91737
Ldlrap1	2.26398	4.63099	5.44048	12.405	15.188	22.4428	5.37511
Leng1	0.129152	0.622135	0.903659	17.4342	17.1518	11.3517	7.25553
Leng8	1.55894	2.50143	2.36024	7.07804	9.77081	10.4161	9.74518
Leo1	22.6453	10.2118	1.39435	12.6488	38.567	74.103	28.2861
Lgals1	0	0.135969	6.28297	27.5163	16.4154	6.64196	53.7675
Lgals2	0	0.233284	1.32169	12.511	9.61	2.41269	0.917876
Lgals3	2.12729	2.76658	2.59972	16.2852	14.981	8.75393	13.6255
Lgmn	10.9633	22.2933	18.3792	78.5637	159.17	78.1221	38.4014
Lias	0.70761	0.3966	0.643059	29.0867	61.8965	81.1886	31.0174
Lima1	2.78724	1.90645	1.45796	9.86844	8.38633	3.10138	14.213
Lin54	10.3651	8.35934	21.4456	30.1104	18.7384	7.05804	6.18284
Lin9	5.008	6.51624	7.07425	18.1494	16.9623	12.065	12.3175
Lman2	20.4535	12.6061	7.60809	17.808	37.8608	44.8495	45.2893
Lmbr1l	1.3632	5.73718	5.46815	8.67187	11.7919	5.98066	1.94426
Lmbrd2	4.22084	10.637	10.2894	9.97313	6.51356	5.49815	3.73718
Lmx1a	0.239764	0.446124	0.99463	6.38145	0.779081	0.0425856	0.0420249
Lnpep	5.40899	2.75525	2.19437	7.33903	3.08202	4.21033	2.79296
LOC100502896	4.97941	4.31485	26.2111	92.972	5.9478	0.0323003	0.205128
LOC100862015	4.46964	0.0178549	6.80502	21.2573	0.00723552	0.00564295	0.00501243
LOC100862015	4.46964	0.0178549	6.80502	21.2573	0.00723552	0.00564295	0.00501243
LOC101055863	2.7558	4.15615	13.6973	41.3289	0.000165436	0.113045	0.220401
LOC666331	0	0	0.157717	7.23321	0.509061	1.26597	0
Lonp1	3.57462	6.95524	10.793	12.3804	18.4871	38.2681	37.809
Lonp2	39.2458	100.77	86.9144	111.156	38.5838	25.4163	15.67
Lonrf3	3.74911	11.1178	10.7238	7.83684	1.99781	2.2079	0.249021
Lpcat3	0.220302	0.749544	1.25425	6.93952	20.8737	74.6618	79.532
Lrpap1	1.32657	5.4333	5.56409	15.3965	19.809	240.311	123.984
Lrrc25	0	0	0.0848084	5.32411	4.47106	1.24784	0.177027
Lrrc46	0.362926	1.49578	1.70872	5.5006	3.50316	2.78019	0.388164
Lrrc51	0.610534	1.0388	4.29726	6.4483	4.43511	3.49494	0.922866
Lrrc58	1.46658	1.38468	2.12102	5.10764	21.5358	20.115	26.1986
Lrrc59	1.66335	11.405	16.0955	26.3726	50.872	81.2866	78.3549
Lrrfip2	3.4563	12.7167	16.2813	7.57693	3.48043	6.70989	4.89193
Lrwd1	4.0636	4.8346	1.85007	6.73135	7.89342	15.9534	24.0785
Lsg1	5.10176	7.8556	5.20202	53.7319	149.863	64.8927	38.817
Lsm10	6.17701	69.5094	50.8615	74.3389	41.1314	9.87633	15.0363
Lsm12	1.56694	2.60735	2.48594	11.6556	26.2597	65.2593	24.3031
Lsm2	52.2435	58.6745	91.732	225.995	306.412	279.909	152.774
Lsm4	2.90173	2.2219	2.10149	23.733	43.6832	133.611	313.741
Lsm5	3.18428	3.3821	2.85734	8.74305	32.5911	100.058	92.193
Lsm6	0.901899	6.89679	7.01881	5.50446	1.88455	2.7509	5.52399
Lsm7	14.0229	39.0743	49.3328	52.564	30.4579	92.4049	107.271
Lsm8	10.4931	12.847	13.7226	122.687	201.309	207.286	152.263
Lss	5.97769	3.91817	1.53926	6.15142	10.7587	23.1451	9.70974
Lst1	0	0	0	20.1155	40.4882	39.5929	1.12579
Lta	0	0	0.203145	5.8252	6.5678	0.360056	0
Ltn1	4.54531	3.89849	2.90216	6.81991	10.4023	6.53967	9.00618
Ltv1	26.1603	49.7273	22.2171	88.8757	193.478	276.409	96.1767
Luc7l	15.6355	19.1306	7.75465	43.7075	95.2323	109.324	62.1752
Ly6g5c	0	0	0	15.2569	19.1173	3.73562	0
Ly96	0.19544	2.02319	3.27598	8.39725	43.0123	142.882	11.9264
Lyar	106.49	65.3063	25.8167	212.414	345.906	262.521	138.436
Lyrm1	0.970482	10.0424	12.669	24.0322	26.3151	13.5309	9.43768
Lyrm2	0	0.329368	0.400533	9.58341	13.4477	9.97309	13.6788
Lysmd1	0	0.0967901	0.248488	13.8801	6.20772	1.29462	2.66004
Lysmd3	1.03079	1.91846	1.96361	7.2818	4.50314	4.12103	10.0185
Lzic	9.87617	15.7936	15.1336	20.4157	20.107	14.9901	13.3609
M6pr	3.27937	19.0817	20.9601	43.0473	77.2004	84.5818	77.5913
Mad2l1bp	70.0398	44.3307	69.9825	454.871	607.404	224.086	29.9489
Mael	14.8737	38.6772	46.7362	38.4316	17.2866	5.24569	7.3677
Maf1	1.9408	1.4243	2.22032	10.9094	18.1779	17.9851	60.4017
Mafg	5.07874	3.30462	2.36998	8.96176	8.47375	10.8655	3.8233
Mafk	0.55261	0.375782	0.685474	7.99284	9.81735	2.99043	3.96522
Maged1	0.296873	1.18858	1.88239	7.07593	1.49252	3.16774	56.311
Magt1	5.78141	6.48089	3.60239	8.94109	14.673	18.1097	25.7991
Mak16	0	0.348398	4.3249	132.827	213.629	85.1569	111.004
Malat1	0.746001	1.58155	2.11646	5.28154	16.6662	36.4424	95.1137
Malsu1	1.35739	7.57031	3.23902	8.45102	28.7927	78.2426	73.1575
Man2a2	0.15551	0.227475	0.18003	5.23082	2.09043	0.77817	0.291777
Man2c1os	0.102082	0.231106	0.655744	21.2363	10.6107	3.75382	1.48162
Manbal	0.821251	0.841201	0.0681963	5.22384	19.9798	25.9963	15.3696
Manf	4.89657	23.439	17.9716	58.8533	88.0569	57.1502	86.4809
Map1lc3a	0.565632	3.04649	4.10068	35.4156	67.9069	217.042	9.99683
Map1lc3b	24.0848	29.2011	30.4877	190.099	570.306	860.935	415.389
Map2k2	3.81642	0.457794	1.93525	7.32094	12.625	50.9215	7.17289
Map2k3	0.552067	0.690284	1.06035	20.7567	16.2988	10.3705	25.7696
Map3k3	0	0.023787	0.154277	7.14512	12.1682	2.96734	2.82424
Mapk13	0.166565	0.74827	0.530801	7.01241	9.19261	6.63021	4.78024
Mapk14	0.404738	1.90296	2.72356	14.8383	18.1213	2.52827	6.58231
Mapk3	20.5181	73.2709	105.925	43.4161	2.97086	1.55701	2.61738
Mapkapk5	5.08204	2.45158	1.80031	14.011	14.0129	7.12305	6.40005
Marcksl1	0.371911	0.651648	2.51471	23.8918	22.7563	111.894	61.8713
Marf1	12.3618	25.1015	31.4417	32.8683	7.30789	3.90503	1.56831
Mark3	0.997381	1.00213	0.871769	5.20364	11.9873	8.61857	3.07579
Mars	0.804713	2.09302	0.853635	11.1112	20.3289	69.5926	98.637
Mars2	1.95032	0.839954	1.97907	16.4586	34.1226	13.2676	5.13098
Marveld2	13.3468	10.1014	2.08947	5.83459	1.71522	3.9996	2.51382
Mat2a	39.4362	33.5088	20.732	91.8113	321.378	595.015	83.5034
Mau2	5.0117	8.14765	9.34984	10.1036	12.0589	15.1987	7.57015
Max	9.69756	16.6319	23.0823	22.4652	5.4486	4.76451	13.2759
Mbd3	1.92367	2.15733	3.47663	11.5067	9.26725	17.1058	25.5974
Mbip	1.9517	19.7092	17.6742	20.4902	51.2609	12.0779	27.1897
Mcee	2.71005	27.7526	13.2668	14.5835	11.9688	15.1198	31.7471
Mcf2	1.856	2.55228	1.38484	7.81873	6.18797	1.15789	8.14021
Mcfd2	14.9544	12.9391	3.98805	44.7442	87.0337	41.9561	32.7595
Mcl1	0.28564	0.297584	1.57249	14.131	27.9148	24.3484	9.66229
Mcm3	12.3643	22.2112	5.59869	17.6091	33.358	39.4657	76.0076
Mcm6	47.8548	61.5068	32.5321	83.2079	162.39	204.743	167.832
Mcrs1	3.52246	4.38573	3.74035	10.9008	19.4952	20.4932	10.5503
Mcts1	0.937606	0.707812	2.34308	16.5988	41.6657	73.6225	96.4795
Mcts2	0	0.824086	5.78995	55.5968	56.3912	51.1647	29.6866
Mdc1	2.16382	2.68969	1.9937	6.48847	7.34803	2.74174	2.38529
Mdh2	3.8723	16.964	17.6836	192.769	427.306	361.606	490.587
Mdm1	5.79315	4.28312	2.418	6.7113	7.08144	1.08344	4.34231
Mdp1	0.211155	0.77792	0.530715	12.9548	26.6704	16.315	16.2344
Me2	14.054	37.3676	36.0026	31.6131	21.5231	5.1284	4.71071
Meaf6	4.83843	26.1633	33.3222	51.1794	43.239	47.9774	28.6892
Med1	21.9485	63.3977	63.89	43.951	50.5529	26.7762	18.7874
Med11	120.204	26.4166	16.1319	54.5187	67.9367	48.7363	35.053
Med13	2.84331	2.8127	3.56632	10.6681	7.34315	1.94477	2.28769
Med14	3.47938	4.25044	3.76272	9.41416	7.99688	7.61128	1.43486
Med16	2.74834	1.42944	1.16265	6.46487	8.99356	8.33918	13.4982
Med20	127.092	61.6418	10.1165	25.9636	58.0925	58.2565	8.52208
Med24	9.96446	8.86831	10.1884	24.0402	36.3702	41.2714	14.209
Med29	0.0488159	0.236658	0.833866	58.5892	78.1046	42.3487	10.2369
Med4	61.6925	75.4562	63.5426	170.446	283.688	87.1205	44.6819
Med6	20.424	195.623	94.4665	104.039	375.966	266.131	62.7788
Med7	8.29775	13.5262	10.1856	56.6969	54.5497	18.277	17.7466
Med8	19.6724	18.7075	7.86858	19.8297	37.0492	44.8999	45.8575
Med9	1.52093	3.27241	4.70017	14.9343	18.4079	14.4537	18.7419
Mef2a	0.209013	0.064965	0.120843	5.93819	2.37534	1.00712	1.69725
Mep1b	0.518847	2.59414	3.01632	5.68391	22.6414	39.955	18.7298
Mepce	2.51995	6.37254	7.09777	9.38587	6.77064	1.59524	1.97557
Mesdc2	0.275326	0.840465	0.720699	8.88814	9.74827	31.2774	79.0958
Metap1	3.68513	7.54967	4.70352	32.59	88.8174	73.2389	37.5018
Metap2	26.6214	55.4069	68.768	85.4058	146.339	165.858	40.7082
Mettl1	11.7591	10.1861	2.8386	10.8097	12.3885	33.6428	23.7474
Mettl16	5.9705	5.98447	0.971485	8.48091	20.1495	25.4168	31.1201
Mettl2	0.209226	0.409191	0.699024	23.4106	52.483	30.6559	11.9551
Mettl23	0.325813	1.65385	1.37802	7.74055	9.85316	6.82404	20.5959
Mettl4	9.53691	30.5072	24.1708	20.6899	15.5053	10.052	4.54789
Mettl5	1.1229	2.22735	2.42952	16.09	13.3058	49.9857	100.448
Mettl8	3.05169	10.8174	9.231	6.28614	1.18197	1.33935	2.22829
Mex3c	2.00835	2.16897	2.44874	9.33711	5.90994	4.78925	3.91372
Mfap5	0.163288	0.183353	0.470714	40.5854	81.1576	31.1754	2.51622
Mfn2	2.08072	5.67926	6.73227	14.2485	19.3833	11.7128	6.53781
Mfsd2a	16.9994	122.249	82.0489	44.2171	25.0277	0.326893	0.253943
Mfsd5	5.07824	2.3984	2.03974	40.3997	69.5581	101.103	18.5885
Mfsd7c	0.0774551	0.0432312	0.0963837	11.9797	33.6324	77.4194	7.20702
Mga	2.48646	2.27711	1.9468	10.7415	17.7959	8.20622	10.077
Mgarp	0	0	1.50626	14.2071	19.6293	41.6668	216.685
Mgat2	0.314245	0.321924	2.53873	44.0867	80.7686	33.2457	23.8186
Mgea5	3.20858	5.38614	4.11324	10.0826	16.5796	11.5076	8.80574
Mgme1	3.91709	7.7874	3.12027	9.64806	6.60738	16.8623	8.27012
Mical3	2.07435	1.41556	1.74202	5.0034	16.811	17.4575	3.06034
Micu1	5.82568	14.4689	12.6658	22.8972	11.0165	4.93044	6.24076
Mid1ip1	0.96596	1.69878	1.89372	7.37246	0.796752	0.34447	0.730002
Mief1	4.29106	20.8872	24.1698	17.4326	17.661	11.3878	10.9063
Mien1	1.34585	4.74894	6.39551	21.2472	60.2754	138.084	116.763
Mier3	24.6287	19.4047	27.7584	134.217	311.813	307.119	31.0537
Mif	4.63432	8.58158	5.41806	54.9453	101.934	219.686	358.292
Mina	13.7164	14.0179	4.36185	35.4245	99.0662	36.2192	24.1041
Minos1	11.841	13.1128	18.1568	46.359	50.1896	46.7619	62.1482
Minpp1	7.1137	3.79963	4.52588	12.9389	21.4981	4.68074	7.47269
Mir8099-2	0	0	0	64838	0	0	0
Mis18a	61.0116	117.229	45.2957	147.61	220.806	93.1654	21.7575
Mixl1	0.0304746	0.170409	0.33157	7.45898	19.2314	8.85821	0.278964
Mki67	8.64768	8.83522	9.3189	18.1579	13.8729	4.2498	3.91863
Mkks	1.62502	3.1224	4.34039	14.5189	16.0968	17.4717	15.3369
Mknk1	78.9407	19.6101	6.85901	21.5309	30.5835	18.2167	3.66233
Mknk2	0.925633	0.774946	1.16928	8.51114	10.5916	4.17788	0.770423
Mkrn1	2.60103	12.701	16.2358	79.1967	112.981	252.218	266.027
Mkrn2	19.9318	35.4502	44.6684	99.924	93.2297	50.9909	21.5984
Mkrn2os	3.21401	5.05561	2.12502	8.16525	15.972	15.8759	0
Mlf1	3.32298	6.23926	4.72097	8.89096	2.93456	1.01124	0.105899
Mmp19	2.73146e-09	3.47793e-10	0.0106539	9.46158	2.81319	0.392717	0.0802713
Mns1	1.92809	3.14976	1.945	13.6964	8.95918	2.93505	1.0019
Moap1	1.59701	0.755776	0.714814	7.07483	1.65134	2.45172e-06	0.80696
Mob1a	47.2454	36.923	25.8273	121.305	162.661	93.2064	40.0753
Mob2	11.3445	9.03699	4.04378	17.6763	36.4853	30.3823	15.3422
Mob3a	3.54041	5.02493	5.19764	7.69105	4.59784	0.901037	4.23177
Mon1a	1.31637	1.79404	1.10233	35.8149	107.534	87.3752	9.0439
Mon2	2.59043	2.95688	4.07907	6.34546	1.88449	1.45735	1.73991
Morc2a	2.1157	3.36778	1.92087	12.9844	25.9705	10.2008	10.2499
Morf4l1	3.23896	3.08185	3.09456	10.4898	11.7786	18.5359	30.6064
Mpc1	16.5706	10.8567	20.824	67.8191	106.433	113.066	20.6844
Mpc2	10.0136	10.0589	9.9198	153.969	216.396	481.579	50.937
Mpdu1	0.0733982	0	0.117056	18.186	38.3928	46.4834	155.647
Mplkip	0.102284	0.142872	0.440151	6.8114	11.0695	13.4545	9.61359
Mpp1	1.46105	2.45001	1.0759	10.4213	5.73867	20.645	23.7478
Mppe1	0	0.144191	0.257605	5.19082	5.31971	10.4148	13.1277
Mpv17	0.26268	0.0490699	0.159133	9.42884	13.4484	24.2238	19.9858
Mpv17l2	2.29424	3.21465	4.41356	13.7369	16.5275	24.2591	52.7788
Mrap	2.78145	18.0575	11.4766	6.24794	6.01119	1.94894	0.0626722
Mreg	2.48853	1.7618	3.05712	5.86231	7.8955	11.9878	17.5415
Mrfap1	12.1435	25.8027	42.354	66.141	109.407	223.824	311.178
Mri1	2.65451	0.916628	2.45232	5.08168	6.53252	5.9924	25.8509
Mro	2.1151	8.98041	14.2294	5.2669	0.224085	0	0
Mrpl12	3.47277	16.6933	8.86653	58.8312	233.975	315.525	246.195
Mrpl14	8.62468	12.6999	11.261	18.9688	16.494	65.8191	133.661
Mrpl15	0.458739	1.03977	1.0101	5.97577	26.9097	57.5383	54.4515
Mrpl2	39.845	26.8956	27.2488	55.937	101.905	92.4805	137.21
Mrpl20	2.11964	1.3055	4.3451	100.877	407.264	517.19	212.17
Mrpl21	134.162	60.5515	12.2523	32.0903	107.055	191.384	94.9484
Mrpl22	21.3991	14.4	3.60136	28.8814	142.888	339.901	73.6496
Mrpl27	1.11107	1.66111	0.577087	15.6784	39.3777	95.4034	62.4194
Mrpl28	2.59758	8.34251	4.83861	47.836	135.983	120.575	143.856
Mrpl30	6.85991	27.2387	23.0648	33.5918	37.8254	134.443	165.123
Mrpl33	1.0374	25.6729	3.26047	53.8858	131.524	311.697	252.126
Mrpl34	21.1289	22.0395	29.1368	115.492	187.229	111.535	147.683
Mrpl36	1.79532	3.38572	4.02566	6.1466	28.4324	79.1966	155.826
Mrpl38	5.05741	9.09834	10.9404	26.6038	54.9011	47.4519	60.7145
Mrpl39	5.03876	7.17446	2.02157	8.20165	33.7364	90.3272	57.0821
Mrpl4	14.2494	27.5684	19.8	63.8852	122.951	171.358	110.652
Mrpl40	34.1312	54.7215	64.448	129.713	245.867	159.56	187.47
Mrpl41	0.428377	1.58917	2.18862	24.6508	29.1654	26.3485	16.802
Mrpl42	11.2204	8.18348	13.5649	48.9374	102.646	185.271	346.036
Mrpl43	0.52855	1.18933	1.14498	44.4094	85.2825	93.994	78.5731
Mrpl45	36.3613	25.9613	11.8324	23.6957	30.0327	45.4719	61.3372
Mrpl46	2.84826	8.28985	8.15529	44.137	62.9418	153.732	73.2015
Mrpl49	2.38313	1.28763	2.04913	28.1089	27.5073	62.2011	37.9169
Mrpl50	5.07421	8.61076	6.14259	11.7435	22.0525	20.9418	29.0715
Mrpl51	2.91909	5.13614	5.91022	28.6198	63.2917	62.3021	64.7694
Mrpl52	2.93564	16.4526	0.92394	38.6659	185.689	341.359	588.564
Mrpl54	3.08974	6.17119	5.57024	35.472	88.0306	167.859	198.404
Mrpl55	1.5846	21.3324	12.8441	13.5956	22.5395	72.7395	96.7067
Mrpl57	2.0096	4.42751	6.5671	16.7953	31.5416	42.9817	35.9679
Mrps10	0.501471	1.79192	1.85544	5.11861	23.9767	35.077	27.8706
Mrps11	1.37733	6.94524	3.25976	34.8706	57.3636	71.7112	61.5541
Mrps12	4.34449	7.9756	9.12152	28.1379	57.0094	70.9713	129.424
Mrps15	22.7924	10.5405	5.52412	29.6474	59.1107	85.1839	115.984
Mrps17	4.34155	16.0961	12.911	18.1247	43.9863	59.2047	63.7272
Mrps18a	4.99907	21.0852	15.5958	15.4414	55.6311	155.32	100.889
Mrps18b	11.8334	53.3795	25.7979	47.1155	110.656	377.266	227.056
Mrps18c	2.30505	15.9867	7.92192	35.3108	121.166	291.822	235.468
Mrps22	10.0207	32.227	14.6868	23.2326	68.9052	143.312	73.5454
Mrps24	2.72312	6.33934	9.65563	51.323	154.732	205.232	200.148
Mrps26	14.0757	11.1833	18.6869	91.3261	206.818	150.321	62.0988
Mrps28	5.94153	11.7685	5.3579	23.9218	68.7897	131.041	141.877
Mrps30	0.234414	0.420616	4.32643	13.2775	10.1827	20.833	12.0657
Mrps34	0	0.113615	0.87501	13.4985	15.4642	86.6208	69.2753
Mrps6	25.2442	26.7681	17.6704	163.261	354.684	176.022	93.1588
Mrps7	2.71235	12.6889	18.7341	72.8463	133.527	135.291	79.1163
Mrrf	3.14271	14.7544	17.3544	11.0339	8.94486	15.3573	10.0131
Mrto4	4.70858	16.5229	15.4516	58.5008	157.769	203.097	107.687
Msantd2	1.09599	1.15762	1.44916	8.13991	7.89329	6.18148	1.84358
Msh5	0.354108	0.285382	0.446544	5.01584	3.31396	0.0545128	0.699886
Msrb1	1.33153	1.62328	3.52494	28.3898	56.3595	16.9621	8.21469
Msto1	2.61039	4.48493	3.28927	45.8305	41.9973	23.5623	44.1967
Msx1	0.0742584	0.873003	4.87071	7.71193	0.88431	0	0.603005
Mt1	0	0.844275	9.65903	762.392	1768.31	2429.08	2907.11
Mt2	0	0.798252	11.9356	813.017	2307.2	2296.75	1555.35
Mta2	0.261294	0.413381	0.808273	52.509	107.906	64.8109	79.8707
Mtch2	0.200191	1.31093	1.56828	17.0777	21.1416	82.9286	117.427
Mterf3	15.3289	16.6575	11.8308	25.8457	48.6343	33.5187	22.2084
Mtf2	40.1164	23.5901	7.34113	74.6101	130.366	106.112	96.4162
Mtfr1	17.9595	24.0645	22.1991	55.9385	26.4502	25.3128	72.4381
Mtfr1l	21.2639	73.8092	106.646	51.6596	35.2044	22.2235	40.2854
Mthfr	0.27684	0.723692	0.327155	6.24969	9.89498	7.06236	5.38092
Mtif2	6.49071	6.5717	3.51348	7.18297	5.11074	6.13111	12.6245
Mtif3	3.00497	7.35875	8.4491	6.96369	2.77648	3.83966	2.98514
Mtmr3	3.65264	2.72302	2.45547	6.21952	9.94623	1.95184	1.99083
Mtmr6	6.0775	6.78177	7.48619	13.684	21.3289	5.87467	3.17397
Mto1	2.73156	13.1862	15.4563	5.87847	4.94496	8.12718	11.4216
Mtrr	1.02031	2.67691	1.9354	7.8857	29.2146	31.3755	22.9487
Mtx1	1.58317	5.49523	1.84502	6.24983	22.5965	47.7316	44.5965
Mtx2	1.19684	12.4669	1.52179	16.9356	52.9086	58.3218	87.2464
Mul1	0.778451	2.80364	1.92884	7.7115	8.39474	11.3622	6.39027
Mvb12a	0.948252	4.09862	1.19185	15.8431	21.3485	20.5037	44.4351
Mvd	1.36706	2.27434	2.86925	5.5124	2.58656	10.2712	12.3514
Mvk	0	0	0.606866	16.4256	9.84834	2.57858	9.44329
Myadm	9.92702	14.7509	18.771	27.5062	26.4732	119.562	20.9633
Mybbp1a	5.27463	4.60652	0.633231	24.2811	74.0242	180.596	167.062
Mybl1	1.98023	1.64449	2.60193	6.86419	3.04086	0.0669674	0.68159
Myc	0.0289044	0.258353	1.96524	7.14352	48.4969	50.372	15.1672
Myeov2	101.505	136.484	263.109	358.395	153.653	152.853	295.763
Myg1	0.410128	1.49591	0.932887	29.0193	45.0229	49.4345	24.0508
Myl6	7.17411	11.2791	12.6908	43.1826	57.2425	188.819	181.937
Myo1b	7.05388	9.70872	7.54534	16.0402	41.0296	55.127	28.291
Myo3a	0.304945	0.354196	0.700662	5.72461	5.30805	0.270292	0
Myo9a	1.83393	1.42153	1.51351	5.11086	4.98685	6.00932	1.51579
Mzt2	0.932163	7.46021	2.40368	5.602	6.52006	32.1602	40.2287
N6amt2	0.111835	1.39484	0.822384	67.4555	142.881	184.402	71.1891
Naa10	31.2831	15.0136	4.79627	28.2738	48.8507	118.915	114.523
Naa15	4.37731	3.98987	2.73195	16.1285	27.185	21.5845	35.0746
Naa20	13.2091	20.1529	16.3665	33.8064	26.9707	43.1726	36.819
Naa25	29.5104	17.2505	5.57261	11.4928	17.726	34.346	32.7281
Naa38	2.413	9.05296	4.90652	102.079	161.754	172.777	361.751
Naalad2	17.0928	18.1639	10.871	24.4858	57.8792	160.658	5.25183
Nabp1	1.64937	3.09766	4.633	19.2684	73.426	54.5117	14.4026
Naca	8.2556	17.3976	21.6045	19.6277	26.695	94.2043	106.426
Nacc2	2.55346	1.59597	1.07221	5.99084	10.3016	3.45216	1.08834
Naif1	0.802734	0.566115	1.17979	5.4326	3.53197	1.6021	1.20368
Nampt	2.14553	4.13193	2.82928	17.8852	28.0217	10.6795	27.7983
Nanos3	0	0	0.0641208	8.50432	6.75911	4.43144	0
Nanp	0.168564	0.441779	0.869803	6.77175	7.33051	1.41072	3.51924
Nans	3.66193	2.19815	2.89588	50.7404	36.1446	11.3317	23.3306
Napa	2.68491	13.4441	15.3484	11.8601	30.5881	23.8461	51.5852
Narfl	2.32623	1.17227	0.389901	20.8784	37.2534	28.9495	14.9576
Ncapd2	3.40202	2.3796	1.80537	12.3077	19.69	9.27023	28.0118
Ncaph2	3.39922	7.95084	5.80783	8.72323	19.9518	33.6098	53.9483
Ncbp1	0.690853	0.843806	2.24285	64.8291	133.512	130.681	41.0842
Nck1	6.07235	40.2498	11.542	14.4611	21.5779	17.6312	17.8163
Nckap1	12.9005	11.9695	11.29	28.2762	15.8463	14.5729	8.34445
Ncl	47.785	39.7128	17.0253	36.8778	88.0164	178.767	203.571
Ncmap	0.369227	0.509169	0.144467	16.1838	16.9763	2.75766	0.635984
Ncoa1	3.72771	3.59478	3.54533	10.3509	3.34715	5.11242	1.08641
Nde1	25.176	13.1451	18.2156	38.6539	14.5178	9.82819	15.6358
Ndrg3	0.828011	0.796385	0.972876	6.78129	15.9381	25.8185	14.9035
Ndufa1	2.4058	16.0146	12.5894	32.4551	29.3652	33.5872	112.221
Ndufa11	0.436724	1.34925	1.27424	12.8929	25.6571	42.8188	50.4961
Ndufa12	0.11287	0	1.00223	6.44882	16.1621	40.2759	41.1296
Ndufa13	3.1792	4.7195	7.10149	23.6644	30.2745	54.2925	109.375
Ndufa2	9.41124	54.1308	28.4853	221.638	195.844	169.961	361.455
Ndufa3	0	16.6192	10.3252	13.4575	57.2536	465.012	968.184
Ndufa4	79.7782	301.939	288.222	436.808	238.636	565.056	1244.04
Ndufa7	1.03201	10.4924	7.73363	77.5896	128.127	201.323	522.901
Ndufa8	5.71576	55.8573	26.7536	13.6773	40.786	99.4005	279.04
Ndufa9	1.6542	6.8382	2.58351	29.1616	56.2954	170.83	158.814
Ndufaf1	0.157513	0.176811	0.215014	11.3089	44.1522	24.3444	12.3129
Ndufaf5	0.149653	0.557376	0.305017	8.50096	14.6455	9.96311	10.6715
Ndufaf7	7.1268	12.5728	6.20775	15.2997	40.811	23.0825	8.9172
Ndufb10	1.24091	6.91106	4.52831	78.329	104.21	163.681	187.02
Ndufb11	4.7717	18.3109	23.1384	62.8635	75.0751	108.051	72.4048
Ndufb2	70.1232	87.4723	115.574	186.95	317.775	312.157	423.379
Ndufb3	17.1837	66.0345	30.0796	35.5301	48.5445	189.686	417.29
Ndufb6	69.9286	83.8064	122.133	213.137	224.846	288.147	724.229
Ndufb7	2.265	11.9816	4.24539	42.2446	121.216	297.962	291.765
Ndufb8	21.9535	38.9371	29.9278	54.0349	46.7445	121.185	514.949
Ndufb9	6.60634	16.0993	11.6695	59.1315	115.553	252.337	688.118
Ndufc1	2.41012	4.62711	2.27583	80.7359	215.115	382.384	818.895
Ndufc2	3.43981	12.4153	5.91181	11.6029	23.4799	73.1517	325.336
Ndufs1	7.07983	8.45906	4.1373	8.51921	24.6566	47.2845	60.3136
Ndufs2	4.39964	31.6266	12.2096	13.8149	17.667	39.5455	145.836
Ndufs7	2.74144	14.552	3.25014	22.103	67.5528	200.899	236.438
Ndufs8	6.11961	12.3999	5.29848	55.5842	132.436	197.181	221.755
Ndufv1	2.54329	13.9483	3.21587	18.2097	35.3066	62.7917	123.569
Ndufv2	3.14507	5.47003	8.07859	24.5691	74.3947	79.0565	155.152
Ndufv3	3.09252	4.47488	6.53393	25.1149	44.0293	151.167	316.086
Necap1	0.521392	2.07276	2.74382	19.0464	41.2742	51.186	33.0491
Necap2	1.17761	4.12616	3.69001	33.1963	46.4879	17.5046	26.202
Nedd8	25.4888	122.697	126.586	207.755	304.356	437.729	428.038
Nek2	10.9255	44.5161	27.0725	50.0654	67.4456	43.3389	23.4198
Nelfb	4.50277	2.08819	1.21092	13.4309	21.567	15.5773	17.4287
Nelfe	2.52903	10.0548	5.88403	51.3269	68.7851	86.1378	33.8761
Neo1	6.37227	2.18314	1.56694	6.08637	0.132419	0.0245889	0.672251
Neurl2	1.86167e-75	1.2166e-20	0.163449	13.8698	10.7173	15.1578	2.14586
Nf2	16.4364	14.6248	11.3718	29.6934	62.3141	37.0518	15.6941
Nfatc2ip	1.04186	1.14113	1.46777	7.06017	7.00036	10.8367	21.8003
Nfatc3	0.0957291	0.225267	0.576728	8.07664	9.76276	5.76669	5.12206
Nfe2	0.0400628	0	0	16.685	8.0279	1.70115	0.770412
Nfyb	9.802	4.72542	2.63534	35.9105	53.1042	38.5255	26.9273
Ngdn	47.7812	76.8167	76.9225	117.028	181.185	169.393	163.3
Nhp2	4.95645	11.6718	14.2716	247.352	432.354	740.025	483.007
Nhp2l1	58.3277	154.155	142.939	317.505	582.507	440.911	239.318
Nicn1	7.4433	5.11381	6.46267	48.5023	15.023	8.18262	8.22153
Nid2	0.119501	0.0888133	0.559307	12.058	9.76798	1.69043	2.05255
Nif3l1	4.3613	7.77058	8.95509	17.6751	38.3356	42.7226	25.6679
Nifk	5.90705	54.6609	31.1581	116.478	218.905	161.858	115.201
Nip7	22.2557	15.9945	18.5398	46.7831	104.295	77.1058	63.4795
Nipa2	1.55836	2.16975	2.69096	25.4731	55.4297	37.3023	18.5205
Nipal1	0.435501	0.399079	0.429048	7.01269	51.6615	39.8499	3.18924
Nit1	0.753396	5.20627	5.64568	12.8064	9.21095	22.0348	27.5291
Nkiras2	2.97034	5.34321	6.5882	41.7233	23.1435	28.8082	12.3675
Nktr	4.96553	2.80454	1.84842	15.619	29.8223	8.17355	4.75532
Nle1	0.123773	0.508476	0.693295	10.663	25.672	33.9146	21.945
[truncated: 1,570 more rows]

## Sheet: Human ZGA genes
Supplemental Table S4. Gene list of porcine, mouse, and human ZGA genes and their transcriptional levels in oocytes and early embryos
Gene	MII_fpkm	2C_2PN_fpkm	2C_3PN_fpkm	4C_3PN_fpkm	8C_2PN_fpkm	ICM_2PN_fpkm
44446	30.2321	19.0214	17.1923	16.8116	55.6983	43.0044
44451	0	0	0	0	6.61255	1.33433
A1BG	0.0773719	0.211438	1.04233	0.186327	38.9204	0.840947
AAAS	3.54336	18.1512	17.4802	16.9984	8.69087	48.6568
AAED1	5.80795	6.94778	6.39004	5.98984	30.9849	17.1097
AAMDC	1.75307	2.97767	11.0711	6.42025	73.6887	19.2755
AAMP	0.972706	0.693017	1.97726	1.63628	24.4574	184.642
AAR2	1.11028	7.99219	6.71742	6.05396	13.3334	38.5257
AARSD1	1.22179	3.98351	4.92612	3.59464	9.25631	45.1966
AASDH	11.4381	3.31657	1.75231	2.63953	6.83568	4.29839
AATF	1.28717	8.13808	6.25797	6.24594	24.2168	46.0969
ABCA11P	1.17628	2.63637	3.56816	2.34483	10.1213	1.99093
ABCA17P	0.720591	1.18565	0.666325	1.28077	6.20585	0.127598
ABCC5	1.58895	3.60713	3.76612	4.93371	5.09658	7.21631
ABCF2	6.79659	18.2633	17.4268	24.4922	23.7494	53.0908
ABHD11	0.213041	1.92987	1.18286	2.22635	5.351	55.9063
ABHD12	0.526495	6.42486	11.3184	8.23606	6.36696	47.5655
ABHD17A	0.885663	3.53898	4.67944	2.38362	16.6016	54.6561
ABI1	2.89243	10.2248	8.01877	10.4768	6.21343	18.4441
ABRACL	0.57924	0.108407	10.7079	2.11553	15.8784	114.319
ABT1	0.388012	0.537141	1.20829	1.19381	123.159	142.6
ACAA1	0.851527	7.66918	12.0245	12.4295	10.3418	50.7374
ACBD5	0.387205	0.228442	0.427198	0.111228	11.0807	3.34538
ACP1	55.1188	72.371	101.078	83.4164	462.774	136.728
ACSS2	0.243504	0.724418	0.589665	0.641922	5.51769	5.37229
ACTR1A	1.52161	3.68406	5.3268	3.33748	7.92089	42.7945
ACTR5	0.437397	6.6919	5.35272	6.12335	5.38624	15.2747
ACTR6	8.96367	2.53059	5.1119	2.69155	74.2746	67.6393
ADAT3	0.415698	1.37387	0.61273	1.02469	17.4193	39.629
ADIPOR1	4.88192	21.0524	28.4617	22.2553	46.7399	135.203
ADM	0	0.399344	6.59096	1.01982	57.3382	43.8046
ADPRHL2	0.283815	1.78919	1.95404	1.54178	16.0582	45.3107
ADPRM	6.31019	30.8354	31.6744	29.7188	23.2479	5.76814
ADRM1	40.492	130.383	140.712	152.993	130.017	182.792
ADSS	9.84221	4.50002	5.28692	3.6496	7.66946	13.9784
AEBP2	1.03849	0.342871	1.31222	0.724484	15.3733	10.7373
AEN	1.35017	5.01586	4.28279	3.89213	14.6189	42.511
AES	0.82819	0.307636	3.68551	0.605955	48.7698	4.36153
AFMID	0	0.056864	0.203111	0.791158	271.802	2.55663
AFTPH	1.54218	0.413214	0.447931	0.437806	14.5901	2.92245
AGAP1-IT1	1.22155	2.55818	2.78808	2.71921	6.02184	0
AGL	1.20209	0.55998	0.769589	0.646695	6.43517	35.4345
AGPAT2	3.88618	34.7301	35.7366	30.5323	12.3309	57.4702
AHCTF1	11.4169	5.04507	4.56586	5.44608	12.6802	5.52929
AIDA	2.36381	2.48951	2.262	2.30339	6.26076	4.65473
AIMP1	5.57559	2.37724	2.78765	3.1391	7.04274	28.4112
AIP	6.7612	30.1722	33.5591	29.5421	42.386	18.1435
AK2	3.21469	13.2007	12.3886	12.3636	86.4711	180.564
AK6	287.921	26.6695	23.7601	27.0861	669.489	192.645
AKAP14	0.145703	0.532176	0	0.747998	8.17514	0
AKAP8	0.914424	2.43595	2.40638	1.89351	17.8908	20.547
AKAP8L	12.4898	11.5945	13.1229	15.6986	25.0427	54.4963
AKIRIN1	22.9938	12.6667	19.9333	16.9168	44.2099	114.506
AKT1S1	0.962642	5.37268	5.6117	4.78784	21.0623	26.0532
ALDOA	35.4332	162.739	203.559	128.438	331.832	1131.17
ALG11	6.8739	14.2817	13.8028	13.869	15.1265	7.81837
ALG13	6.84973	9.4103	12.4241	8.75006	155.413	32.889
ALG2	10.1931	5.84201	6.41383	6.55101	18.7957	21.4593
ALG3	6.80345	29.0074	36.7912	33.0132	19.1346	38.7726
ALG5	2.87161	0.931055	2.90148	1.17453	76.8434	42.057
ALKBH3	4.18032	18.2428	20.5267	15.1363	11.5496	6.08858
ALKBH4	2.99776	4.39076	4.61801	4.35727	6.27463	19.8657
ALKBH7	7.94163	17.5833	19.4504	19.1517	124.032	70.889
ALKBH8	0.239614	0.241581	0.285025	0.374813	7.45093	5.00791
ALPPL2	0	0.00395953	0	0.0244245	28.9432	18.794
ALS2	2.08689	3.30315	2.48566	3.23359	15.6965	2.28638
ALYREF	2.89655	13.6739	16.8706	15.5681	103.89	247.153
AMD1	419.832	269.215	256.479	251.567	717.535	86.0756
AMDHD2	0.555384	0.690208	0.784772	0.331352	14.5403	31.8743
AMZ2	28.5764	41.2268	51.5487	40.1484	61.7695	43.1842
AMZ2P1	0.335622	0.715515	1.27664	0.892049	5.19224	1.63135
ANAPC10	250.502	78.7624	64.0078	71.2814	148.272	36.2722
ANAPC13	4.44592	82.7803	100.635	78.2943	116.82	75.7301
ANAPC15	64.4333	91.2896	87.3985	75.6513	271.123	65.974
ANKRD13C	2.21444	1.60211	2.01767	1.50178	7.65447	11.279
ANKRD37	109.007	184.25	152.517	154.32	223.821	3.83633
ANKRD39	11.0467	9.81387	8.69973	11.1948	26.3908	42.4988
ANKRD49	10.2197	9.49124	7.43635	8.66858	36.385	14.8681
ANKRD54	0.378499	1.77463	2.21377	2.30068	7.25206	17.8258
ANKZF1	3.44849	3.40016	3.88738	4.33296	10.055	17.0929
ANXA5	11.3248	18.847	47.7392	17.8586	84.0279	200.657
AP1G1	1.36183	3.3633	3.51902	3.41673	5.33896	8.13322
AP1M1	5.08647	35.7163	46.2832	43.7677	11.8328	23.5983
AP2M1	11.3038	43.176	46.6297	39.8213	39.244	467.269
AP2S1	8.15732	26.2097	36.6081	31.3927	439.671	231.756
AP3S1	111.438	70.1677	76.4739	62.1586	151.337	74.5647
AP4B1	2.45549	5.97079	8.34824	7.31874	8.64118	7.0967
AP4M1	0	0.234491	0.792629	0.301845	29.855	10.1156
AP5M1	1.76015	8.51542	8.07472	7.21358	21.3078	30.8702
APEX1	6.87767	43.0727	40.9412	33.6851	180.994	311.039
APEX2	3.14533	15.3796	17.357	16.6683	19.0589	36.8032
APITD1-CORT	3.48608	5.12466	4.95653	6.40452	7.83976	1.68782
APOA2	1.92822	5.24945	5.18733	4.05074	21.087	45.9714
APOC1	3.50861	11.9292	20.7328	17.8093	80.3526	224.963
APOC1P1	0.473748	0.162884	0.704633	0.346253	12.5459	7.18135
APOC4	0.08943	0.834625	0.36545	0	5.43278	1.22957
APOO	15.6413	68.369	85.8436	73.6946	57.3039	33.0543
APOPT1	20.2221	42.8004	37.8904	34.1859	62.5632	61.7903
APRT	5.4124	2.9582	22.7501	4.82568	16.7802	373.267
APTR	16.4239	11.2773	8.2002	15.9787	60.9283	14.8626
APTX	1.54418	6.42816	9.57835	7.36949	71.2114	52.7352
ARF3	2.9426	13.8057	15.178	15.3451	31.9963	25.8976
ARF4	69.6946	50.4078	75.6723	49.8344	168.362	290.209
ARF4-AS1	0	0.408883	0	0.84664	20.0377	0.843512
ARF6	8.55871	6.80316	7.48147	6.84511	15.8764	58.5391
ARFGAP2	3.14149	5.41123	4.12053	4.03482	7.19754	21.9885
ARGFX	0	0	0	0.0115424	219.932	12.0891
ARGLU1	2.53192	2.58738	2.93146	2.77224	58.9487	81.9321
ARHGAP11A	7.90346	6.86644	6.94654	8.21359	17.7037	8.53632
ARHGAP5	7.53845	2.76537	2.69828	2.47275	12.7857	6.34035
ARHGDIA	6.13065	49.203	52.8029	52.6895	25.3474	57.3956
ARID3B	3.06628	11.4967	10.6672	10.5721	7.52841	10.864
ARIH2	5.06257	10.5271	9.72202	9.06374	19.172	48.8325
ARL15	7.92131	9.52395	11.5537	9.54278	19.2127	17.241
ARL16	1.94938	1.8437	7.36105	1.88293	53.0027	89.9095
ARL17B	0.787235	4.67976	3.82577	3.56756	37.8136	7.32748
ARL2	5.59159	22.9593	26.5801	21.8014	12.4975	187.175
ARL4D	14.8762	86.3084	61.4926	55.2621	427.504	34.0893
ARL6IP1	153.347	166.439	158.335	166.562	307.566	78.2618
ARL6IP4	4.79494	6.58592	20.9565	7.05689	10.3343	141.691
ARL6IP6	14.3613	4.90153	6.98001	5.59515	16.3484	26.197
ARL8A	0.244537	0.0782219	0.584894	0.227628	9.66858	11.0579
ARL8B	39.6773	20.4383	15.8454	18.2599	163.104	56.9481
ARMC7	0.324935	2.89052	2.57085	1.84606	15.5765	1.86686
ARMT1	5.63744	2.08799	2.44629	3.9309	64.7863	221.609
ARPC1A	3.20483	22.4603	50.1103	25.8803	39.9368	147.903
ARPC3	13.0121	8.53699	32.2562	14.6454	155.561	146.472
ARPC5	6.6776	20.8269	26.7084	17.3798	17.9234	164.787
ARPC5L	19.2293	15.3288	15.0097	16.2837	146.485	89.3302
ARPP19	5.32475	13.2563	13.5749	13.7183	106.8	26.3555
ARRDC1-AS1	2.3279	5.60274	3.08093	5.62264	8.70186	10.6645
ARRDC2	0.064409	0.191231	0	0.170306	13.5422	19.3365
ART3	0	0	0	0	6.92783	0.532549
ASB3	13.1803	6.68323	4.92116	6.69951	18.0473	7.51717
ASB6	0.482307	7.48834	7.0271	5.96506	5.39462	13.6207
ASB7	0.525678	0.428721	0.300603	0.527897	6.02731	4.06119
ASCC1	0.806247	0.644092	1.88251	0.784451	20.8901	15.9381
ASCC2	2.21751	16.5073	14.7517	12.4991	7.41126	32.4616
ASCL2	0	0	0.141473	0	13.9117	0.429486
ASH1L-AS1	0	0.0336248	0.13762	0.0787134	41.1564	1.38323
ASMTL	0.269346	1.63841	1.93828	2.13687	5.46498	2.65468
ASNA1	1.81664	5.57749	4.68097	7.77036	224.582	140.231
ASNSD1	57.5415	38.3308	51.5351	34.5179	80.791	58.6459
ASRGL1	2.36103	3.22276	3.56832	4.01928	18.14	171.889
ASTE1	2.03895	3.02053	3.12426	2.48611	7.06839	5.61099
ASTL	1.43146	14.4919	21.9828	21.0458	6.40372	0.0731049
ATAD3B	0.0550155	0.426021	0.51068	0.325989	12.1059	141.601
ATAT1	0.885911	0.606042	0.663177	0.830099	5.08183	4.95093
ATF1	13.4105	6.0275	4.3965	5.06608	27.978	43.7591
ATF3	0	0.0314857	0.271044	0.0649775	19.0142	2.70777
ATF4	12.3898	47.5079	68.8629	54.302	197.703	218.268
ATF7	3.42521	12.9754	13.9779	10.9027	31.7632	10.573
ATG101	0.871659	1.63678	3.39507	3.68453	126.721	50.8903
ATG12	1.82944	1.32298	1.84378	1.69362	58.5934	8.64723
ATG13	0.209511	4.05476	4.96418	4.25908	12.2866	15.4947
ATG14	21.8635	26.7895	18.9924	23.3245	44.1268	4.0016
ATG16L1	4.06432	2.41491	2.67931	2.7864	12.1316	17.7928
ATG3	13.5999	22.4637	29.8025	21.8149	340.555	503.152
ATG4A	13.6131	27.0161	30.2534	24.4041	27.5865	16.6554
ATG4D	0.492147	3.78614	3.53857	3.00331	9.48602	16.1832
ATG5	21.9907	27.2583	36.8779	29.5241	158.073	130.869
ATG9A	0.242945	0.765452	0.474551	0.534431	6.92814	5.62704
ATOX1	24.9396	54.0804	83.4067	82.0279	197.61	115.609
ATP1B3	33.5084	31.2811	42.8329	34.1909	81.4353	97.4911
ATP23	6.92966	3.81019	2.95088	2.95994	13.559	13.1732
ATP5C1	70.6659	228.782	328.506	272.842	222.794	730.51
ATP5D	38.9447	103.296	159.132	147.084	130.436	494.792
ATP5E	159.444	15.3455	101.854	33.7886	877.005	358.897
ATP5F1	7.28996	14.7902	20.4765	13.9278	51.7555	209.458
ATP5G1	19.5346	40.3244	75.6995	47.4308	83.0353	333.983
ATP5H	40.49	38.2788	63.5123	41.8096	277.608	189.28
ATP5I	29.5428	37.2097	62.3619	55.9096	340.578	583.12
ATP5J	215.08	158.774	214.303	176.399	419.662	724.467
ATP5J2	35.9507	94.1934	140.896	127.276	256.832	581.125
ATP5S	11.0994	5.09206	4.50077	5.15559	10.9117	2.54316
ATP6AP2	8.28831	2.26957	2.81905	2.31619	10.1747	32.0606
ATP6V0C	4.90491	38.7959	33.5137	33.5719	78.1194	51.4115
ATP6V0D1	10.994	158.967	169.245	142.585	43.5371	102.826
ATP6V0E1	28.8229	151.806	172.642	133.66	606.879	299.637
ATP6V1C1	17.5679	33.0186	36.0106	25.845	37.2131	30.1532
ATP6V1E1	8.64128	28.7104	43.1338	27.7312	129.08	129.871
ATPIF1	13.1737	76.3584	124.76	115.561	1045.89	296.495
ATXN1L	3.10247	4.51438	4.07952	5.30791	6.43945	1.2045
AUNIP	15.2866	46.5729	52.1647	49.3969	84.299	27.2365
AUP1	1.61404	10.0058	10.7847	14.4845	8.37657	89.3212
AURKAIP1	12.3125	28.1952	38.3564	34.1005	236.161	664.736
AURKB	74.8556	121.25	107.625	109.591	169.078	160.719
AVPI1	0.304789	9.00145	8.3881	6.18323	15.9458	31.2934
AZI2	9.11263	63.8038	60.7879	56.1626	50.6349	19.3709
AZIN1	19.0484	29.2588	32.0542	27.7064	45.5588	33.2689
AZIN2	5.43503	15.9816	20.3266	20.5644	11.4108	2.07727
B2M	67.0343	6.0367	228.331	32.7429	70.9494	23.3028
B9D2	0.709083	3.91341	3.85101	2.13233	28.5299	7.17916
BABAM1	5.3024	18.1287	20.0243	19.4285	21.9552	120.347
BAD	3.13022	12.503	22.5591	12.0135	20.3123	60.2655
BAG1	0.41927	3.82065	5.10667	3.26289	13.3689	32.319
BAG2	2.78629	2.46045	7.39698	2.43385	5.23686	9.91396
BAG4	9.80651	6.18272	6.5317	6.49782	93.3873	12.1994
BAG5	10.0136	9.68745	10.6162	11.8603	31.2077	10.8787
BAGE3	6.77309e-05	3.06344e-05	6.27046e-05	6.09038e-05	5.34589	2.53233
BAIAP2L2	1.07688	5.05511	4.66388	4.80546	29.5779	1.00912
BAK1	0	0.522118	0.898748	0.0874556	14.1872	18.7889
BAMBI	3.62664	2.7188	5.53241	3.24736	85.7587	94.1341
BANF1	19.423	156.457	157.205	149.123	462.376	343.648
BARX1	0	0.0477904	0.121019	0.174245	11.6678	1.43513
BASP1	2.93487	4.21668	8.66696	6.72436	37.3087	35.0399
BATF3	1.04126	5.52623	5.37532	4.97588	53.4181	11.4475
BBIP1	24.7359	19.1156	20.792	19.0703	102.157	4.19954
BBS5	4.45397	10.1727	11.9693	10.2468	13.8888	0.759184
BCAP31	9.03993	48.5289	45.5832	42.3147	76.5111	78.5662
BCAT1	0.672108	0.0519944	2.27132	0.383485	5.14879	35.9228
BCCIP	246.022	167.299	188.491	177.866	404.416	253.565
BCL2L11	3.68398	4.83101	6.28627	6.66334	57.4413	3.08273
BCL2L2-PABPN1	16.7215	4.65144	11.0322	12.4634	52.0924	16.2677
BCL7B	0.445188	2.80174	3.90827	3.68774	8.34281	71.104
BCS1L	0.690446	4.7978	4.2364	3.85709	23.8177	41.5548
BECN2	0	0.0196702	0	0	28.3585	0.678248
BET1	4.35116	1.25434	6.91023	2.25598	49.3194	46.2279
BET1L	0.476322	1.50701	1.73024	1.88317	7.80225	20.5674
BEX2	2.4754	0.167157	11.4732	1.14892	26.0003	9.75819
BEX3	5.95596	0.599924	39.0174	4.51363	19.3587	42.8337
BEX4	1.99506	0.214577	9.15872	0.89253	29.7028	52.2756
BFSP2-AS1	0.815415	16.2284	11.7764	10.7188	6.97397	1.17487
BICDL1	0.7991	2.97964	5.20148	4.58404	6.01718	1.98339
BIK	1.06227	1.08379	0.920061	0.636949	1747.47	10.4626
BIRC5	6.4802	12.8054	10.7511	13.8669	56.9025	85.1634
BLOC1S1	7.76996	26.6344	59.6043	36.3543	54.3436	110.351
BLOC1S2	7.08019	7.11293	13.1807	9.38363	27.9958	53.9704
BLOC1S4	1.47287	1.45713	3.45974	1.76768	23.1813	66.5793
BLOC1S6	3.65793	2.70564	3.20121	2.84974	19.4323	6.33755
BLVRB	1.28169	0.208701	2.10643	0.45321	41.5148	33.0453
BLZF1	22.6842	23.1429	24.084	18.7288	50.2695	15.3904
BMP4	0.332039	1.8002	1.44673	2.17238	10.7426	2.76676
BMS1P20	0.262157	2.20458	1.94808	1.74307	12.8386	4.91452
BNIP2	4.1906	2.09191	3.14929	2.69473	76.2182	19.676
BNIP3	9.94665	56.8604	72.9479	54.0326	66.9965	174.871
BOLA1	2.02362	6.6107	7.16765	3.9809	21.9639	13.7589
BOLA2	1.32824	2.57265	2.9573	3.92103	270.432	83.3357
BOLA2B	0.386115	1.56991	3.31404	2.5833	126.184	49.8505
BOLA2-SMG1P6	3.97682	14.5059	19.8137	13.4167	38.0953	63.1737
BORA	19.4481	18.1649	19.3731	15.0658	41.5414	14.4184
BORCS6	0.137253	0.0592628	0.453842	0.210286	8.49836	17.6818
BORCS8	3.68701	10.5572	8.58331	8.84519	11.1503	14.8534
BRAT1	0.284845	0.0585128	0.471624	0.166463	8.21114	19.5432
BRDT	70.901	37.2541	41.4485	39.995	95.0635	38.7614
BRF1	0.06408	0.69485	0.480093	0.378988	7.59753	2.51892
BRF2	0.659861	3.99572	3.50186	3.01159	12.95	6.21652
BRIX1	164.147	361.425	245.152	270.877	1267.79	225.799
BRK1	34.8479	62.4025	71.2208	55.7209	160.627	146.375
BRMS1	1.63732	7.55162	4.95216	6.00766	30.9477	155.674
BRMS1L	0.878184	0.365192	1.04657	0.11753	20.8223	29.0352
BROX	1.39254	4.10505	3.76043	2.22227	55.5097	12.2729
BSG	12.0887	115.989	129.55	123.212	214.175	243.296
BTAF1	0.637252	0.344106	0.440696	0.602637	9.13748	5.67626
BTBD7	2.74329	0.982684	0.834387	1.4017	5.59787	1.53693
BTD	0.44048	2.46725	4.31069	2.94542	6.5369	3.88978
BTF3L4	0.626932	9.55622	12.6882	8.32555	26.5418	44.9886
BTG1	14.2242	9.45613	7.74012	8.07756	22.491	19.8942
BTG3	1.24201	0.302436	3.19579	0.700903	83.9964	67.0144
BTK	0	0	0.0323361	0.101464	15.9686	2.97985
BTLA	0	0	0	0	14.3825	7.95224
BUB3	50.3802	119.755	118.716	108.469	350.765	265.115
BUD31	13.8659	33.6037	58.1814	35.0067	1275.97	323.591
BYSL	0.714491	14.9787	13.8677	11.573	34.8278	35.8573
BZW1	30.3942	24.4554	31.344	26.7367	374.235	197.192
BZW2	21.006	28.5692	32.6768	27.4661	77.5122	109.41
C10orf2	0.300154	3.5838	3.64519	2.67075	16.6617	8.38001
C10orf76	2.58874	1.73099	1.12186	1.23476	6.24736	2.31869
C10orf82	7.09225	37.5211	46.047	37.3613	14.6098	0.619204
C10orf88	0.770984	1.27355	2.62239	1.82975	5.94935	5.9504
C11orf1	1.78628	1.62505	3.54176	1.646	5.06672	4.8468
C11orf24	2.24978	20.9164	23.3536	20.0349	11.5895	12.1519
C11orf31	114.113	152.619	203.7	191.837	381.901	116.329
C11orf54	4.10978	1.20173	1.17477	1.23784	13.1789	13.2475
C11orf65	8.38508	5.4119	5.04541	4.33762	8.78041	0.306457
C11orf71	0.540703	6.50685	6.12491	5.57707	15.9089	10.2256
C11orf98	9.05606	24.2982	35.4643	31.2428	926.376	461.916
C12orf10	1.08905	2.1876	4.9534	3.32294	61.1127	28.5343
C12orf45	17.504	19.8884	20.3167	19.1331	279.507	99.3226
C12orf49	1.0684	3.49844	3.35012	3.05361	27.234	9.90839
C12orf57	10.4583	14.2052	14.9905	19.2164	517.812	84.7403
C12orf60	4.07963	11.8751	7.92486	5.05713	189.599	4.09092
C14orf119	33.3762	41.2708	39.9674	39.6795	211.324	80.6484
C14orf2	155.803	349.971	352.099	423.092	1163.14	408.51
C15orf40	13.5569	6.32311	4.25593	5.50329	20.8308	19.9264
C15orf41	4.63488	7.92399	8.34137	9.24556	28.3478	8.37985
C15orf65	8.36468	1.07206	2.35479	1.3101	64.728	1.02418
C16orf59	0.438099	3.14039	4.78579	3.65476	6.41488	22.4417
C16orf72	12.4156	15.2005	14.1952	16.0119	26.29	7.03337
C16orf91	6.01502	10.2402	8.61327	10.814	415.4	72.1973
C17orf80	2.76165	9.17619	8.61172	5.82842	14.1337	8.41925
C17orf89	2.93009	1.85906	15.6659	3.75343	288.205	105.808
C18orf21	1.36241	5.33531	7.47435	4.53428	245.158	28.2604
C18orf25	1.7969	5.86505	6.86016	4.89706	11.1463	6.56537
C19orf24	7.74402	91.8314	76.1295	63.6844	133.393	100.134
C19orf25	0.91562	2.56603	2.80227	2.38782	9.1646	27.7376
C19orf43	8.09353	26.9292	29.4038	30.4631	691.5	221.612
C19orf47	0.771058	11.0959	12.7702	14.6885	20.842	13.1995
C19orf48	7.04118	53.6934	61.0744	50.8548	316.324	492.781
C19orf52	0.351301	0.911479	1.16656	1.96566	30.0596	27.44
C19orf53	5.81933	32.0969	39.909	31.9915	1155.07	212.442
C19orf60	1.53923	6.87429	10.8199	6.71856	9.26275	100.576
C19orf70	3.67155	4.38152	11.7085	7.51668	98.2378	60.0707
C19orf73	1.01044	1.56322	0.562008	0.844162	9.93045	1.43169
C19orf81	0.0825175	0.393852	0.406225	0.168306	31.4538	5.85391
C1D	3.44776	0.761989	3.50159	1.10194	306.055	30.4294
C1GALT1	20.2307	6.21483	5.89763	6.05686	33.4776	4.46284
C1orf112	3.48272	2.73728	4.09543	2.80513	20.1933	14.3979
C1orf122	3.99519	17.7403	31.6868	21.0935	187.238	284.492
C1orf162	0	0	0	0.192015	25.3875	0.505016
C1orf52	1.79781	1.00272	1.65035	0.861253	86.7666	33.1971
C1orf54	0	0	0.351054	0.259036	9.64067	0.456316
C1orf64	0	0	0	0	5.36829	0
C1QBP	10.3966	84.5499	98.0716	77.3377	925.571	1600.53
C20orf24	44.5142	98.8859	148.074	140.935	396.254	395.476
C20orf27	11.6738	25.6705	26.2096	28.2465	24.2973	131.714
C21orf91	4.92139	6.28264	5.50082	5.03294	64.3451	8.66344
C2orf49	3.97632	7.05047	5.48464	5.92217	95.7	11.1014
C2orf69	6.9933	3.18902	3.80856	3.30412	30.8364	6.92675
C2orf74	0.498654	0.0296714	1.57293	0.667348	13.2399	14.9718
C2orf76	2.60394	167.497	217.483	125.014	177.626	15.9497
C3orf58	0.662934	0.241842	0.342048	0.417407	5.85537	2.31871
C4orf3	1.3216	2.84307	8.07041	3.68049	25.6517	34.5909
C4orf32	0.167881	0.0707788	0.679294	0.27967	13.9781	1.27732
C4orf46	0.0111318	0	0.140765	0.00663485	23.9835	18.9684
C5orf15	7.90386	8.58549	10.2946	10.5249	27.8255	25.6204
C5orf58	5.15233	77.7236	65.6036	87.1265	25.44	12.9528
C6orf106	2.5455	4.80443	4.38088	5.9554	7.64857	18.5528
C6orf120	1.37044	2.01808	2.76245	2.5429	9.9724	3.67782
C6orf226	4.39748	7.15022	5.13971	5.09868	19.3477	4.92924
C6orf48	70.81	95.4878	101.821	99.072	359.235	58.2472
C6orf62	16.8503	4.13256	8.45137	5.68021	64.6403	79.9654
C7orf49	0.31497	28.7168	30.3133	21.0705	23.3653	27.8229
C7orf50	4.9159	11.0151	18.6383	12.2268	11.5155	84.6582
C7orf73	2.14448	2.66799	10.6514	2.8412	30.9002	25.0495
C8orf33	2.07368	2.04017	2.48412	2.19191	123.156	45.2261
C8orf59	7.05934	4.52362	9.23848	5.58047	106.209	43.4529
C8orf82	0.188501	5.51223	7.74059	5.369	6.98142	19.0677
C8orf88	0.372103	0	1.60514	0.13045	8.88154	1.1543
C9orf142	0.52356	3.50837	7.07886	3.55852	10.6701	51.0237
C9orf16	4.24017	6.81703	30.6451	6.79721	109.882	30.5839
C9orf3	3.62786	9.59262	12.1307	8.12074	11.0991	9.83673
C9orf64	1.00541	0.305011	0.4993	0.2931	13.1846	12.1115
C9orf85	1.25893	0.809851	0.520934	0.58906	125.74	20.1995
CA2	0	0	0	0.0414691	5.4559	296.863
CAB39L	0.335425	0.862901	0.650096	0.467827	53.7362	2.73073
CABYR	13.2988	86.5923	104.927	70.0495	58.8895	6.84229
CACTIN	1.43824	4.92483	4.5505	4.60464	14.7766	4.44254
CACYBP	8.27301	14.1615	13.3521	12.5902	54.7596	90.5582
CALCOCO2	7.01108	45.8788	41.8517	31.7963	32.7037	13.9238
CALM3	1.01685	7.99064	9.11752	7.57453	155.593	101.412
CALR	5.01445	10.5766	7.91058	9.50093	23.7047	42.6425
CAMK2N1	0.0908148	0.199286	0.796941	0.370503	9.12376	3.2742
CAMTA1	119.358	110.299	117.507	107.931	356.533	103.704
CAP1	9.80976	5.87265	9.70801	6.98545	14.8802	120.698
CAPN13	5.51558	36.9423	52.5118	57.8323	30.341	0.0200104
CAPZA2	5.78238	6.26032	21.4401	6.66122	12.8862	106.883
CAPZB	11.7989	50.5225	42.2926	43.3122	23.8659	132.691
CARD19	1.34875	2.56607	6.17074	2.65918	8.11288	19.0637
CARHSP1	1.17788	4.54192	4.1802	4.90262	14.614	84.0692
CASC11	0	0.0260678	0	0	43.7202	0
CASC9	0.222368	0.755308	0.796802	0.784022	8.8303	2.55138
CASP3	5.76429	23.7406	23.1675	21.7463	109.997	72.1686
CBLL1	12.7298	21.2841	18.6933	13.1725	26.6087	13.8465
CBLN1	0.129609	0.0667093	0.209324	0.0372598	16.3498	0.0222129
CBR1	1.66064	0.0473112	6.87697	0.81672	6.83997	41.6078
CBWD1	27.2418	10.9212	13.8499	11.1296	80.5212	69.1799
CBWD2	7.82242	3.1001	6.55081	3.88068	48.398	46.4017
CBWD3	4.41443	1.63276	3.43482	1.88637	11.1995	14.5115
CBWD5	46.1711	16.8004	16.9049	18.9343	175.829	46.5052
CBWD6	3.68508	1.55242	3.21025	2.16298	7.93601	11.8178
CBX3	19.5583	15.3483	22.6619	18.3908	330.046	124.732
CBX5	5.31574	6.67232	6.03644	5.5282	20.2471	5.31039
CBX8	0.499628	10.7858	7.32312	6.99522	15.2757	4.60703
CCDC107	0.337341	2.32219	3.24925	2.65615	13.1211	3.83488
CCDC110	0.590769	0.681211	0.271578	0.069656	10.177	0
CCDC115	2.2754	11.5855	18.7918	13.0405	11.3549	20.2484
CCDC12	13.1712	19.9373	14.4768	15.9172	490.671	180.843
CCDC124	3.9079	24.9368	28.8779	23.6709	117.032	298.079
CCDC157	1.49252	4.5808	4.99063	4.617	8.20228	1.86416
CCDC167	13.3009	40.8825	35.0407	30.4424	39.999	147.669
CCDC172	0	0.0625915	0	0	7.65907	0.585766
CCDC47	8.4952	12.9414	5.5553	8.13529	20.6258	23.3935
CCDC51	1.29002	5.15334	8.37364	6.47173	28.5831	81.2097
CCDC53	9.75596	13.7413	27.3155	16.5499	40.663	23.1452
CCDC58	3.85879	3.4162	5.04049	4.65001	129.952	26.9742
CCDC7	2.93277	4.30946	4.36902	2.60564	6.548	1.09102
CCDC82	139.567	51.0918	48.0967	47.8531	111.282	13.6135
CCDC85B	1.54331	1.09442	4.72298	1.48714	154.167	54.5431
CCDC86	0.374704	4.69477	3.60178	4.02217	34.4295	65.3117
CCDC9	0.758924	14.5729	16.1451	15.7487	6.8045	14.6052
CCDC94	0.741247	4.85933	4.0796	3.9453	44.7298	21.7657
CCK	2.18012	23.638	39.8836	33.8772	90.7909	0
CCL15	0	0	0	0	41.5475	0
CCL2	0	0	0	0	11.2716	53.0746
CCL26	0	0.092768	1.45925	0.151394	7.27708	4.24529
CCNA1	0	0.241995	0	0.238416	100.611	8.48649
CCNB1	441.911	610.053	719.011	698.891	1028.72	295.483
CCNB1IP1	13.1044	25.0968	21.1286	19.2194	146.744	37.5872
CCNC	3.20109	7.80929	9.68795	8.61657	72.3263	214.264
CCNDBP1	4.39722	5.26082	5.32036	4.25807	18.5903	53.3087
CCNE1	28.3007	35.3149	37.9467	48.8213	122.911	153.763
CCNE2	1.33203	3.32425	3.82373	3.03679	27.3861	11.5805
CCNH	10.9284	67.6773	67.9556	70.3339	69.4347	35.5459
CCNL2	9.16133	23.1038	21.1988	20.4135	20.4465	71.8847
CCNT1	16.7475	6.34378	7.4156	7.20141	16.7665	3.11681
CCS	0.806817	4.48813	3.70743	3.13325	6.07475	50.1115
CCSAP	17.4594	11.0867	6.92929	12.0262	29.394	5.97639
CCT3	16.144	75.0478	67.1369	58.4582	83.4356	405.682
CCT5	11.9146	18.786	18.9771	16.9741	53.8473	244.215
CCT6A	13.5389	2.83366	6.67804	4.34944	36.5921	339.64
CCT7	4.82955	4.16655	7.88088	6.36249	38.7099	327.605
CD2BP2	0.542735	1.28777	2.15771	1.50057	10.9099	17.3782
CD320	1.34785	5.34816	5.85369	4.36483	10.5184	147.462
CD37	1.33231	11.4248	9.38788	10.9967	12.4397	0
CD46	2.22077	0.53559	2.27447	0.630703	6.14637	13.1751
CD63	21.8044	0.966984	36.1496	8.41038	56.1662	228.382
CD9	14.6283	41.3986	54.0397	41.7267	38.0808	155.18
CDA	6.13169	33.7863	46.4272	51.4208	16.8781	37.8277
CDC20	52.7315	67.3568	75.5234	89.7284	130.532	134.831
CDC23	1.72085	0.965568	0.686812	0.644292	13.2032	23.5694
CDC25A	4.26136	14.0485	15.707	15.3503	18.062	12.1853
CDC25B	4.0797	20.3792	17.0093	26.2118	8.20322	9.98505
CDC25C	4.26739	27.9899	32.8459	23.6715	16.5267	9.0993
CDC26	16.3874	11.0977	10.9471	10.0256	171.756	31.1512
CDC34	18.2079	39.4404	44.1617	41.2248	114.974	277.237
CDC37	0.859263	3.23576	3.24778	1.74867	68.3556	106.004
CDC42	13.5401	18.5366	19.4909	18.2939	83.9857	23.568
CDC42EP2	0.232347	0.315218	0.981908	0.560683	6.72655	6.42152
CDC6	3.062	26.9374	27.4376	25.4606	50.8085	56.7408
CDCA4	2.80687	10.5009	9.91686	12.473	27.1763	56.9716
CDCA5	2.53624	4.9226	3.97058	5.24977	8.832	66.6239
CDIPT	1.03154	2.06476	4.12678	2.54162	13.8756	31.4471
CDIPT-AS1	0.211572	0.454903	0	0.259022	6.72523	0.775458
CDK1	11.8341	73.5945	83.9616	59.8651	959.695	145.965
CDK2AP1	21.7157	55.4031	51.9164	70.481	90.7609	130.21
CDK4	1.66453	2.14506	5.43748	2.83745	32.0489	153.582
CDK5RAP1	0.934463	6.54985	6.05804	6.46943	15.8136	30.3253
CDK5RAP2	0.653075	0.409071	0.458348	0.280453	5.08094	5.71897
CDK9	1.60101	2.92963	2.0127	3.44483	12.8776	51.1658
CDKN2AIP	8.10563	11.2186	13.2746	10.1298	39.2861	9.24237
CDKN2AIPNL	3.32115	12.7157	15.676	14.6947	7.51037	32.2009
CDKN2D	0.859563	0.0869014	1.22651	0.18255	37.8534	33.5936
CDKN3	2.09025	7.84171	7.72953	7.12662	43.1512	30.8285
CDR2	33.88	7.62816	3.77175	7.29482	15.3926	11.2201
CDT1	2.58342	18.0891	16.385	15.6532	25.4794	33.1611
CDV3	17.2451	13.0969	14.4251	15.3656	176.309	50.4168
CEBPG	10.5921	22.9415	21.9159	21.6685	51.4928	35.8502
CEBPZ	40.3045	11.4273	12.1352	11.6539	86.0744	77.7411
CEBPZOS	7.92348	3.5032	3.04191	3.18511	22.3331	12.2365
CELA3B	0	0.0212124	0	0.048619	6.5884	0.412693
CENPA	90.138	121.95	119.252	121.921	333.853	184.903
CENPF	9.79824	1.99013	2.23042	3.09295	13.3089	13.9254
CENPL	7.5704	14.298	14.7737	10.097	27.3371	13.6769
CENPM	0.476108	6.35216	8.43679	6.35292	16.4761	52.3676
CENPN	7.12256	10.1255	11.1361	12.0963	163.933	72.8916
CENPQ	18.7356	37.7515	51.9511	42.1035	139.938	20.4723
CENPW	43.3784	42.5437	50.6213	65.8749	332.185	63.2847
CEP85L	20.3508	13.7682	14.5854	17.066	39.4883	11.9591
CERS5	1.55046	3.24695	2.32994	2.99512	23.9903	7.70977
CETN2	21.2252	115.868	121.655	103.154	234.599	70.1725
CFAP20	19.0239	12.9929	9.65139	12.2476	121.017	79.9918
CFAP97	6.83732	4.97182	5.30685	5.02541	84.0326	4.73885
CFD	0.758577	3.10015	4.30523	3.71348	38.5108	8.56828
CFDP1	24.0942	19.7934	26.2587	18.2989	85.7247	57.0414
CFL1	201.323	838.888	756.993	718.682	1112	2692.43
CFL2	2.09384	10.5212	16.026	10.2288	91.9064	21.1774
CFLAR	0.730874	0.980528	4.07932	0.827539	8.49872	75.1846
CGB3	0.176228	0.0293592	0	0.01287	5.33674	2.76482
CGB8	0.0283449	0.0178956	0	0.0280883	7.0061	3.51918
CGRRF1	3.5028	11.3299	10.3281	8.50978	9.72578	13.5409
CH17-340M24.3	0	2.64324	2.09287	2.39629	10.0519	4.34461
CHCHD1	18.3572	14.3246	30.5638	18.63	120.591	94.2095
CHCHD10	0.93112	0.0704115	3.38716	0	26.7481	31.3438
CHCHD2	91.9164	143.147	208.386	201.424	752.622	499.057
CHCHD5	9.48771	17.087	22.7291	13.6768	36.4025	38.7989
CHCHD6	5.67037	32.2092	27.181	25.7948	20.7854	21.4904
CHD1	33.7724	5.16244	4.74645	5.59252	17.9316	15.8684
CHI3L2	0	0	0	0	10.008	35.4819
CHIC2	8.70767	61.9673	71.9888	65.3889	88.8064	46.3722
CHKA	0.20224	0.714982	0.612682	0.524845	17.2084	16.8533
CHM	0.965287	0.703977	0.902542	0.776042	9.39591	7.12328
CHMP1A	0.268775	2.84911	3.46671	1.90155	31.5291	51.2876
CHMP1B	10.0427	20.9797	21.6401	20.1822	70.1268	53.0399
CHMP2A	2.62013	1.73725	8.03496	4.31147	62.7595	64.9335
CHMP5	37.0024	27.6018	36.5553	26.7373	195.289	70.3635
CHMP6	0.42056	1.09162	1.59179	0.683735	13.3364	29.3583
CHORDC1	3.609	2.63977	3.71429	3.06567	64.7779	74.2677
CHP1	5.3716	6.06558	7.78616	6.93778	20.3214	17.9829
CHRAC1	3.0561	2.21848	3.4555	3.33672	31.5099	21.8591
CHRNB1	0.251278	0.513098	0.45293	0.545262	25.1473	2.54069
CHST12	3.70304	17.4008	14.9575	16.2131	9.72782	20.6074
CHTOP	1.2292	17.0284	17.6223	13.9412	83.663	55.1773
CHURC1	30.1227	11.0733	10.6266	11.6752	45.4609	14.2405
CIDECP	6.98489	33.4622	36.978	36.9474	52.0362	9.86973
CINP	1.23208	7.41746	9.49232	10.5534	93.7048	63.1605
CITED1	0.525335	0	0.123267	0.257159	6.29787	0
CITED4	1.2384	5.70105	4.32893	5.26077	29.5954	74.0865
CKB	5.57092	42.5848	43.5871	35.9822	29.3198	292.845
CKLF	15.4185	9.54458	7.7638	6.07348	18.2006	20.1468
CKMT2-AS1	1.33474	1.94653	1.02871	1.34588	8.17769	2.02834
CKS2	148.183	233.708	322.43	371.648	5806.93	931.578
CLC	0	0	0	0	49.8314	0
CLDN6	0.637902	0.509633	0.927248	2.2291	120.031	116.272
CLDN7	0	0.084133	0.0451192	0	12.1882	30.3569
CLDND1	19.2656	92.1606	95.0363	76.8065	66.0587	29.4538
CLEC11A	0.194538	0.545138	1.34873	0.362544	9.90092	4.74247
CLEC2D	3.50565	3.54131	4.38495	3.86686	9.46104	7.23929
CLK1	264.655	67.2241	46.669	48.3704	191.805	19.3885
CLK4	1.18383	1.50688	2.23015	1.10965	41.3132	6.79279
CLN5	3.89527	7.5758	7.29072	7.01227	10.9842	8.83635
CLNS1A	11.5486	17.9335	23.519	21.1962	40.6518	155.162
CLP1	6.60396	5.54778	6.56678	2.97549	81.2177	56.944
CLPB	0.485006	2.52148	2.24137	2.57949	9.08699	19.1488
CLPP	5.71725	20.7395	27.2624	21.7334	352.634	124.745
CLTA	38.6718	136.399	160.232	143.95	156.878	326.732
CLTB	5.58459	21.6133	35.2551	26.1809	82.2571	101.526
CMC1	29.2362	18.7169	28.4813	16.9944	41.4997	69.2107
CMC2	236.435	282.858	320.462	313.727	1066.87	147.844
CMPK1	14.3966	9.94115	15.7771	10.0665	52.5692	65.26
CMSS1	2.74617	4.00047	8.20141	5.83899	69.4785	72.7405
CNEP1R1	3.28792	1.55375	1.23806	1.66215	90.1061	24.1781
CNFN	0.113163	0	0	0.16663	46.7522	0.386212
CNIH1	51.9124	52.5898	55.3754	61.5951	334.851	72.1355
CNIH4	5.44605	10.9449	22.4799	15.5081	84.4086	86.5734
CNOT9	6.98398	5.29056	6.04701	6.43332	35.2388	24.3324
CNPY2	5.78585	9.74231	14.2577	12.6129	12.4146	119.234
CNPY3	1.59005	8.4248	8.76815	8.20455	8.38068	31.4311
CNPY4	0.265341	0.528335	0.55096	0.229736	14.0955	0.409403
CNST	15.1707	21.7953	16.8784	21.7758	67.4155	3.50402
COA3	6.33329	14.3605	32.6472	19.299	14.4139	239.762
COA4	21.6051	60.6151	83.9422	57.6487	114.76	161.495
COA5	1.91755	4.57186	7.72985	5.83675	25.1919	21.4822
COA6	13.5831	9.63266	14.0266	6.63336	983.309	178.469
COA7	1.86251	8.18397	8.56249	7.8219	17.4492	38.5626
COASY	1.40423	11.708	11.2464	11.1731	5.50526	64.4804
COG8	2.45109	33.9819	32.7232	28.0494	5.75518	24.9797
COMMD1	27.3122	185.798	225.489	254.357	88.8874	69.6461
COMMD3-BMI1	0.39047	0.131908	0.849219	0.311726	8.65756	6.13634
COMMD4	11.3537	28.4992	34.9437	39.2316	26.0316	85.5665
COMMD5	4.53967	6.16085	10.9267	5.60843	34.5523	37.3526
COMMD9	0.455272	12.3628	13.2448	10.334	9.74764	30.4265
COPE	31.3225	82.8704	116.399	119.724	104.483	466.89
COPS2	37.365	87.3196	102.312	72.2194	75.01	21.4604
COPS3	16.9636	135.286	162.84	131.554	141.013	128.298
COPS5	16.8139	28.9383	33.4324	26.8082	117.276	72.4258
COPS6	4.92943	16.4036	23.3866	18.8966	40.474	166.105
COPS7A	0.91352	3.8275	4.18162	4.19485	7.60854	31.1627
COPS7B	6.6051	95.5571	97.9022	82.2609	28.7181	35.3303
COPS9	38.2685	71.5007	96.4656	130.173	614.463	245.631
COPZ1	4.10665	8.64515	11.5401	8.24676	29.4713	89.469
COQ10A	0.332954	0.39458	0.384405	0.458688	6.69606	11.9701
COQ10B	29.4396	35.4231	39.9383	37.4569	85.9685	49.0489
COQ3	0.886063	2.33183	1.96224	2.76688	5.94205	12.6286
COQ4	1.22192	9.66174	9.92959	10.2063	13.1375	43.8339
COQ7	0.950033	7.83019	8.15961	6.94601	12.2927	8.86068
CORO1A	0	0.322754	0.192561	0.06926	5.65287	14.2292
CORO1B	2.78925	4.01471	6.02732	4.53744	9.54493	36.6308
COX10	7.47459	14.9809	12.8718	13.9734	23.3998	17.2892
COX11	0.974607	2.13116	4.79203	2.2599	5.55963	59.5131
COX14	8.42365	25.8173	48.1401	43.8055	174.153	100.465
COX16	14.6641	19.9222	23.1887	17.5053	400.802	77.8872
COX17	7.68939	3.32918	8.92151	3.16132	139.937	50.4132
COX19	0.879998	0.397081	0.550101	0.264941	20.3957	5.73682
COX4I1	49.9417	99.9775	148.639	168	500.056	1208.17
COX4I2	23.5363	91.0276	88.9431	93.6494	76.8427	0.654461
COX5A	21.0319	51.6698	70.4897	47.0005	213.185	665.56
COX5B	71.1954	222.306	330.981	314.477	1962.74	1219.91
COX6A1	41.4433	205.567	212.51	271.498	1342.7	406.053
COX6C	223.802	555.163	570.196	716.57	1264.19	460.969
COX7A2	129.905	280.231	324.46	315.851	776.577	423.224
COX7A2L	84.3729	214.879	241.103	242.935	286.142	207.845
COX7B	159.645	118.962	192.962	199.888	3259.66	933.062
COX7B2	0	0	0	0	331.298	21.9461
COX8A	123.755	104.72	144.288	128.299	664.769	419.969
CPSF3L	0.39818	0.573642	0.59714	0.395639	10.042	44.0232
CPSF6	0.967081	2.39104	3.257	2.66756	10.2679	36.8847
CPSF7	0.24012	2.74159	2.69571	2.60841	7.90664	5.19271
CPT1C	0.483301	1.05999	0.970351	0.972734	9.0359	0.737892
CRABP1	1.99367	27.3878	24.6176	32.3521	31.7243	1.12789
CRB3	0.791155	6.8858	4.9061	3.26121	30.236	60.3773
CRCP	2.0547	4.91908	3.90791	3.40149	10.0039	4.48039
CREBRF	3.339	4.57284	3.29283	4.42525	10.9904	1.56788
CREG1	1.23849	1.0797	4.49907	1.80843	13.3582	4.12564
CREM	8.6469	5.2085	6.19321	6.87794	165.491	52.5727
CRHBP	0.764119	0.150136	0.0474718	0.068298	5.8241	0.687596
CRIPT	0.540956	2.6917	3.34415	2.24464	94.1338	5.2273
CRLF3	0.706754	3.63417	5.10993	4.0526	8.12402	8.23559
CRNDE	2.58669	3.29906	9.89658	4.24585	154.01	4.27961
CROT	4.86667	2.37572	2.37151	2.53669	6.16251	0.289797
CRSP8P	6.09401	12.747	15.5037	16.9771	13.9966	15.9599
CRYBA2	0	0.0255976	0	0	6.33747	5.11434
CRYBB2P1	0.158896	0.647934	0.917946	0.594817	5.48729	8.42006
CSAG1	0	0	0	0.0426496	228.028	1.05898
CSAG3	0	0	0	0	10.0764	0
CSNK1A1	20.0821	29.3243	24.2843	28.5141	57.5122	94.782
CSNK1G2	2.36757	5.26739	9.32018	7.19745	5.13797	19.9582
CSNK2B	401.681	290.808	321.227	308.169	688.313	256.207
CSTB	12.8418	345.112	328.3	313.629	80.8959	185.736
CSTF3	8.69389	8.90145	8.00968	10.4933	163.3	44.8413
CT47A1	0	0.00316065	0.0118063	0.00750747	9.3749	1.58114
CT47A10	0	0.0063213	0.0118063	0.015015	10.063	1.58943
CT47A11	0	0.0063213	0.0118063	0.015015	9.75737	1.57583
CT47A2	0	0.0063213	0.0118063	0.015015	10.075	1.57743
CT47A3	0	0.0063213	0.0118063	0.015015	10.0072	1.66725
CT47A4	0	0.00316065	0.00590316	0.00750747	9.1943	1.84761
CT47A5	0	0.00316065	0.00590316	0.00750747	9.80974	1.62835
CT47A6	0	0.0063213	0.0118063	0.015015	7.85779	1.3128
CT47A7	0	0.0063213	0.0118063	0.010376	9.59558	1.48367
CT47B1	0	0.00294049	0	0.00139634	23.2056	0.307188
CT55	0	0	0	0	5.31999	6.82606
CTAG1A	0	0.0158025	0.255754	0.247939	5.78198	2.06481
CTAG1B	0	0.0158025	0.255754	0.247939	5.84708	2.3145
CTAG2	1.3662	0.890475	0.316499	0.995264	28.8849	43.0891
CTCF	29.8304	11.6036	9.9108	11.9376	25.3429	28.9196
CTDNEP1	5.42129	22.6954	22.0703	26.4946	32.3426	13.7014
CTDSP2	1.07941	2.29004	2.79068	3.73132	6.02264	6.79741
CTNNAL1	13.2614	3.54439	20.657	6.96307	13.9609	35.2338
CTNNBL1	1.51408	13.0379	12.6399	11.3555	86.9049	57.4757
CTPS1	2.7069	9.18622	10.1461	6.9951	16.413	75.3488
CTSB	5.66303	24.1077	25.6235	21.4566	12.4457	36.5412
CTSV	22.8606	21.6303	18.092	22.5028	63.6615	57.706
CTU1	1.69724	6.22887	9.38978	8.11051	70.348	25.2304
CTXN1	1.18527	3.31677	4.87831	3.91072	9.22998	3.53752
CUL2	2.08372	2.27493	2.93611	1.61092	288.512	23.234
CUL3	3.91093	4.02435	4.75518	4.82439	13.8018	14.5508
CUL4A	3.17877	2.68889	3.68598	3.10657	7.24317	37.8586
CWC15	106.945	110.029	63.6007	98.3868	429.536	83.7994
CWF19L1	5.51103	5.79609	7.01043	5.35311	13.4293	18.9195
CXADR	0.639167	0.79323	0.565595	1.00348	63.4386	11.2332
CXCL14	0	0	0.21943	0.0116891	15.6798	1.2599
CXorf38	3.37448	1.48779	1.32197	1.41558	5.03986	4.76046
CXorf40B	12.4452	109.144	111.519	102.509	217.905	42.1801
CXorf49B	0.0787165	0.820656	0.734779	0.888389	19.4626	28.836
CXorf51A	0	0	0	0.227016	17.042	0
CXorf51B	0	0	0	0.227016	17.042	0
CXorf56	11.8734	21.3133	26.4094	21.2779	31.1596	10.0623
CYB561D2	1.2614	5.34894	4.26871	5.09942	19.197	21.0801
CYB5B	2.64434	19.0732	22.0498	17.355	64.4245	44.932
CYB5R3	2.25163	10.2125	11.25	8.75549	6.6334	25.8115
CYB5R4	0.920539	2.01769	3.57057	3.04916	19.4199	21.6046
CYC1	3.38143	8.07689	19.0928	11.2497	12.671	490.811
CYCS	12.2258	11.6015	20.6044	12.7417	481.613	199.501
CYHR1	0.311029	2.88519	3.19489	3.70696	17.9255	15.2065
CYP2R1	2.15362	6.55952	7.99549	8.35529	6.53778	2.18546
CYTH2	0.459052	6.44552	5.30802	5.16899	5.1457	8.97891
CYTH3	0.681818	3.81779	3.53588	4.42221	5.56882	1.90314
DAB2	0.0434956	0.00508785	0.270314	0.0129319	6.55354	25.7922
DAD1	33.9098	126.591	161.857	114.573	361.07	303.962
DAGLB	0.491273	2.30362	3.94444	2.8348	7.45387	4.70051
DANCR	18.1078	53.9844	50.6298	45.2537	414.019	161.751
DAP3	9.31068	41.2351	38.2135	42.6026	86.0185	122.352
DAXX	1.09244	6.53245	5.06742	5.20479	12.1238	61.5493
DAZAP1	1.3941	4.66578	4.79958	4.73935	6.70626	27.2547
DAZAP2	32.4258	28.493	37.1876	31.3642	80.0391	27.8508
DBI	182.208	219.293	239.477	230.375	760.648	351.185
DBNDD2	1.00239	0.195925	6.45437	0.841667	8.4918	16.418
DBP	0.953828	1.01929	1.06173	0.981536	30.0843	11.8849
DBR1	0.547704	0.227456	0.563775	0.241273	42.6613	23.2321
DCAF12	5.63281	9.6584	13.1766	10.9187	11.2681	25.6867
DCAF13	32.6908	75.3351	87.6523	78.0058	222.696	97.7966
DCAF16	1.61804	3.37636	5.30424	2.73137	8.4464	2.87187
DCAF4	1.52955	3.92298	4.13227	3.79867	15.569	40.2619
DCLRE1B	4.27926	14.9186	12.8093	11.8933	13.541	3.88119
DCTN3	33.0917	32.4566	40.9811	38.929	111.429	35.1201
DCTN5	0.817092	8.59797	8.62505	8.43415	20.813	35.9157
DCTN6	2.53687	7.02672	12.3878	4.74935	9.12056	41.666
DDA1	7.0838	23.5358	16.2162	20.1428	62.0322	18.8256
DDAH2	0.621045	0	1.16856	0.997518	13.5907	7.21296
DDB2	0.337838	4.86028	4.03444	3.79704	5.6904	11.0635
DDIAS	53.6604	20.2905	18.8932	18.8444	70.2733	15.8082
DDIT3	10.6899	9.03195	25.1854	8.66721	456.937	36.544
DDOST	3.16351	11.2532	14.0873	12.1268	6.60944	42.9464
DDT	6.31482	29.9301	33.9476	34.7392	123.511	387.906
DDTL	0.235508	1.70727	1.7347	2.0627	7.70778	22.7367
DDX17	5.00274	2.85391	3.43263	2.56678	13.9237	20.749
DDX20	2.10292	7.59247	6.06388	7.64293	8.93962	25.7301
DDX21	8.8336	5.45867	5.245	6.07073	68.9848	51.6845
DDX25	0.59936	1.6543	2.42694	1.22956	5.03071	0.675961
DDX31	1.75611	8.06617	8.93786	11.2192	15.273	16.3927
DDX39A	1.63649	13.1639	13.0026	10.6756	376.373	245.167
DDX39B	3.55891	31.0731	33.0467	29.1309	35.3821	68.3225
DDX3Y	0	0	0	0.00996855	15.204	1.14662
DDX47	46.8766	110.206	93.0314	88.6791	190.054	88.4707
DDX49	0.73413	3.2047	4.56284	3.74775	43.2721	54.7066
DDX5	25.419	48.0315	47.8456	39.3548	259.496	265.474
DDX56	0.660531	10.8672	12.7891	11.2065	11.4456	79.7764
DDX6	12.7006	8.1074	8.42324	6.89108	21.319	18.1075
DECR2	3.40434	13.7223	9.43076	9.10163	31.0931	68.6848
DEDD	7.01308	59.9096	52.77	49.0464	27.9033	26.9597
DEF8	7.08296	5.8388	16.5111	11.6842	44.8597	146.354
DEFB115	0	0	0	0	5.145	0
DEFB122	0	0	0	0	11.6606	7.95061
DEGS1	5.71687	9.6585	9.40581	9.64494	49.8572	42.8539
DEGS2	3.53812	62.8028	56.4824	58.2506	14.1528	0.629935
DENR	0.734098	0.300469	4.25228	0.668772	102.95	244.088
DEPDC4	5.27475	3.47063	3.64713	2.65316	12.7433	0.999495
DERL2	0.827296	0.627149	2.34357	1.04777	23.0714	14.3983
DERL3	12.1677	47.4823	52.4896	61.5618	33.4055	3.42644
DFFA	3.80594	9.64794	10.6778	8.72491	11.8422	64.1322
DGCR14	0.235933	4.86008	4.87859	3.98056	14.3993	4.17091
DGCR6	0.157052	4.66237	6.17871	3.79896	5.59481	17.5148
DGCR6L	2.46791	12.2067	18.3301	10.4164	10.1005	54.8045
DHDDS	0.829349	2.07905	2.29378	1.30773	9.28858	8.5066
DHODH	0.618182	1.20758	0.822411	1.75195	9.21904	9.82774
DHPS	0.759128	3.99722	5.67217	3.44483	12.9707	33.3031
DHRS11	0.521823	4.02434	4.30429	3.56014	5.10738	8.11455
DHX15	4.46278	5.95176	6.50104	6.71704	59.4838	57.7711
DHX16	3.03688	2.53746	2.05995	2.34181	9.1805	20.0315
DHX40	9.19167	7.51622	8.1036	6.96809	14.7058	8.43131
DHX58	0.154635	5.67307	5.25859	5.82344	7.67957	3.46274
DHX9	1.93297	0.607152	0.829382	0.723368	14.3534	26.073
DIABLO	4.67948	58.1812	66.6152	49.0486	226.315	106.341
DIEXF	0.778377	0.670766	0.74653	0.548975	6.43804	8.68286
DIMT1	13.9045	17.2355	19.9341	15.1782	71.2287	145.093
DIP2A-IT1	0.65271	0.577592	1.94979	0.317954	16.2009	0.117228
DIS3	0.281053	0.442522	0.452103	0.241382	13.6547	10.5763
DIS3L	1.09174	0.976771	1.39942	1.36957	14.7086	3.90095
DIS3L2	1.72443	5.03325	3.51793	4.8865	18.9305	2.36239
DLEU7	0.259198	0.0858036	0.0282014	0.0202638	16.4348	0
DLGAP1-AS1	0.059023	0.0268573	0	0.070101	8.33624	2.3868
DLL3	1.11878	12.2178	11.0034	10.6171	29.3644	5.68943
DMAP1	0.890031	6.30529	6.8389	8.03139	13.1785	46.5138
DNAH14	0.667355	0.638286	1.19517	0.723922	9.76209	12.8893
DNAJA2	26.6568	41.8308	49.4357	42.9453	65.3947	125.438
DNAJB1	5.74714	128.748	130.023	120.007	417.697	143.778
DNAJB11	7.34252	68.1659	76.1034	77.4228	47.9017	46.8614
DNAJB14	3.1871	1.53544	1.68781	1.36231	20.2436	3.07299
DNAJB6	29.1628	56.0613	56.2139	56.0393	114.129	235.042
DNAJB9	30.9159	11.0062	12.6043	11.0234	38.807	7.57327
DNAJC15	192.049	85.4226	74.6224	83.7434	663.336	275.01
DNAJC17	1.99871	36.5697	37.6037	31.1042	75.067	33.3353
DNAJC25	1.92483	0.402126	1.01413	0.701674	13.6965	12.9294
DNAJC25-GNG10	1.51197	0.99317	9.17014e-05	0.0561795	16.85	0.764952
DNAJC30	0.907474	3.64039	3.67417	2.62447	8.58052	11.0747
DNAJC8	50.6321	59.9196	82.1833	72.006	370.716	102.569
DNAL1	2.34221	0.807985	1.19277	0.795045	24.1536	0.851422
DNLZ	23.4621	22.0764	21.1364	16.6886	95.9242	42.584
DNM3-IT1	0	1.4022	1.90828	2.05025	12.9718	0
DNPEP	0.252434	1.16937	1.4737	1.64742	6.78407	18.5884
DNTTIP1	2.74558	17.5412	14.3126	18.0099	25.06	73.1508
DOHH	0.182864	0.732939	1.43548	0.657304	6.13542	1.00175
DPCD	8.91934	37.6941	51.013	49.5517	62.0516	28.9759
DPH2	0.223391	3.48427	5.94708	2.60867	6.94427	89.01
DPH3	0.820199	3.8967	6.49465	4.01105	269.265	23.2354
DPM1	67.9975	42.6997	53.5877	49.3354	423.298	157.417
DPM2	2.43067	10.3267	15.5112	8.33141	89.9937	68.1122
DPM3	4.12373	16.745	21.225	14.4368	66.1753	15.7359
DPPA2	0	0.07569	0	0	85.7849	111.96
DPPA4	0	0	0	0	9.41953	105.292
DPRX	0.352206	2.20979	2.03618	1.54363	820.792	0.63158
DR1	5.75995	15.2638	18.1019	14.3916	45.4813	32.1604
DRAM1	0.388942	0.301837	0.911155	0.198537	46.237	5.60875
DRAP1	18.4877	65.9005	58.6649	66.4694	102.995	101.712
DRG1	5.50193	26.3117	31.279	24.2889	145.264	203.143
DRG2	0.983094	4.05727	2.92305	3.96473	6.00549	42.8221
DSE	2.78431	3.60649	3.30447	3.24004	11.1155	7.66838
DSEL	0.0404818	0.00404737	0.120733	0.0247574	9.24558	0.515849
DTYMK	1.42564	1.82	2.67562	1.06389	119.043	133.054
DUS1L	1.1958	3.82628	6.67387	4.03334	8.69174	85.6094
DUS3L	0.402515	1.22524	0.937027	1.67854	7.40972	45.8805
DUSP11	6.20979	58.8946	62.4926	41.7839	83.0687	68.385
DUSP12	18.8592	27.8626	33.0462	31.5961	213.249	42.8678
DUSP23	5.66074	13.3185	22.7604	18.2311	25.217	53.8667
DUSP28	0.399597	1.30866	2.03356	1.27655	5.08871	2.45546
DUSP3	0.973286	2.06795	2.47087	2.14304	7.11681	7.37817
DUSP5	3.05215	19.7242	18.1165	22.1088	9.79952	24.331
DUT	51.897	13.3545	12.607	13.2387	166.222	138.601
DUXA	0	0.038392	0.074458	1.43304	1297.26	0.6053
DYNC1LI1	2.43176	4.83178	6.09009	5.76251	34.3411	37.0735
DYNLL1	38.5705	122.593	238.006	141.775	956.547	266.774
DYNLL2	0.476699	3.74869	1.58485	4.5311	49.7005	2.73544
DYNLRB1	10.4645	114.608	131.499	116.236	70.2993	100.238
DYNLT1	68.1257	103.046	142.198	109.084	279.348	166.242
DYNLT3	0.447206	0.107905	8.65386	0.88885	23.5385	21.3933
DYX1C1	3.10455	3.35475	4.88496	3.75138	11.4292	1.00915
E2F6	0.0169821	0.0079214	0.0281168	0.0780176	10.7909	9.15759
E4F1	0.489065	1.71961	1.49537	0.985672	7.9523	12.0269
EAF1	1.14164	0.539447	0.692786	0.609966	6.29899	5.99918
EAPP	35.9954	14.6581	20.077	16.0462	95.8568	84.3387
EBLN3P	7.49873	5.7545	6.45943	6.98222	28.0794	4.56018
EBNA1BP2	8.98631	4.51994	7.91433	5.04207	215.516	347.567
ECE2	1.13568	0.889814	3.21836	0.927629	39.1977	74.0096
ECHDC1	2.34571	5.71187	9.63762	8.33623	37.7903	22.8858
ECI1	1.97677	3.52956	8.70244	3.67956	13.2391	166.138
ECSIT	1.31317	12.5973	9.23573	10.9227	9.68858	41.0284
EDA	5.6506	6.27733	7.14999	7.45381	13.1039	0.450302
EDC3	0.964321	7.55652	8.41493	6.05326	10.8646	9.29596
EDEM2	2.58343	4.55996	6.70163	9.36162	6.34694	12.3073
EDF1	28.5069	67.5492	117.513	98.1662	130.32	433.201
EED	0.0164158	0.112654	0.310805	0.173062	19.95	19.0564
EEF1A1	102.354	171.793	232.851	191.2	368.409	616.404
EEF1AKMT1	15.8707	26.6551	29.9585	23.1301	32.6831	3.42669
EEF1B2	7.98819	10.9438	9.06397	9.40127	99.2003	78.1322
EEF1D	9.39842	29.7966	45.0345	43.7321	35.7211	256.368
EEF1E1	62.5694	95.1629	115.793	113.089	272.767	125.798
EEF1G	16.6508	44.8202	53.4986	51.5832	51.6332	131.437
EEF2	16.6754	32.277	30.5851	44.1949	50.4351	66.1199
EFHD2	1.91827	3.69781	5.61945	4.15548	9.71467	55.5288
EFNA4	1.29441	8.81812	7.71664	6.95744	35.467	9.84411
EGLN2	1.04622	5.23353	5.21768	5.38087	23.4444	70.1785
EHD1	1.48164	7.87613	7.03413	6.66517	5.14931	5.43065
EID3	7.69693	15.4952	15.294	21.8114	133.961	4.49943
EIF1	1336.08	1152.49	1255.95	1264.17	2681.59	605.158
EIF1AD	0.321047	0.414923	0.577739	0.0914613	135.079	13.5192
EIF1AX	37.1885	18.8616	17.931	19.7537	57.5493	49.8219
EIF1AY	0	0	0	0	12.5825	6.14579
EIF1B	97.4834	230.344	305.806	254.432	1396.88	177.218
EIF2B2	2.67446	6.51031	8.56552	5.13968	29.2484	69.4411
EIF2S1	21.3977	27.8459	25.8264	22.771	121.563	129.68
EIF2S2	10.8379	13.081	11.9924	13.5099	75.9348	72.2267
EIF2S3	4.21335	3.33582	4.81961	4.1226	24.6403	56.7204
EIF3B	0.493353	2.42242	3.10098	2.98018	11.094	168.35
EIF3CL	2.50638	12.293	12.8121	9.79869	13.1058	67.2695
EIF3D	10.8567	9.25605	9.6084	7.75997	42.145	355.949
EIF3E	169.267	61.8107	68.2471	56.1493	295.283	302.651
EIF3F	14.9282	50.8435	63.9197	53.1476	77.682	48.565
EIF3G	3.54469	13.5229	16.5236	12.2448	379.936	303.959
EIF3H	49.2188	86.2194	99.2277	81.1667	266.01	172.627
EIF3I	34.0179	31.8535	29.2185	24.4103	337.772	328.615
EIF3J	20.643	13.3238	10.7953	15.6936	136.893	32.1942
EIF3J-AS1	0.233476	0.0911337	0.653489	0.067764	6.3842	4.32388
EIF3K	107.193	102.024	142.225	150.522	694.466	653.678
EIF3L	21.9357	40.1148	57.1343	48.8993	121.529	143.367
EIF3M	25.9518	83.4989	86.4462	84.6649	401.233	290.236
EIF4A1	11.4568	10.453	18.3653	11.3579	193.817	187.512
EIF4A3	4.08062	5.2965	4.35681	5.16201	254.83	419.159
EIF4E	63.8278	46.1116	60.2711	49.867	158.258	120.13
EIF4E2	5.61982	29.6981	29.2822	25.4263	133.645	178.484
EIF4EBP1	9.03976	19.8088	77.843	25.1334	23.4958	662.312
EIF4EBP3	0.309219	3.23207	4.81245	4.06331	19.3715	23.5574
EIF4G1	3.29493	6.57768	6.43597	5.8708	12.5392	47.8813
EIF4H	5.33821	16.5035	16.3026	17.532	29.8569	138.167
EIF5	95.9113	61.4301	66.59	72.4922	263.853	121.744
EIF5A	5.23286	21.4611	32.4692	23.6566	130.152	279.348
EIF5A2	0.799568	0.431224	0.813484	0.340328	42.9893	6.51131
EIF5AL1	0.587408	2.96958	5.65125	3.8708	16.3506	27.0909
EIF6	16.7422	27.7367	46.0691	30.3727	288.815	473.25
ELANE	3.73586	24.6541	28.9261	38.9217	24.2079	0.28978
ELF2	3.81388	3.52917	2.82088	3.16696	9.74981	4.91385
ELL3	0	0.068555	0.122094	0.330762	22.1634	0.954764
ELMOD2	0.703578	0.330041	0.492165	0.690672	7.52879	3.08541
ELOF1	13.2901	127.883	119.453	106.214	420.217	146.231
ELP4	12.8738	9.37978	11.2371	8.7886	17.6514	18.9885
ELP5	3.32043	8.15198	9.653	8.71522	25.5714	32.6312
ELP6	0.372109	0.502574	1.9554	0.691874	39.0837	24.5223
EMC3	21.9344	29.4494	25.3867	27.8727	60.1718	18.3737
EMC4	11.9224	16.9843	16.027	13.6237	586.957	159.734
EMC6	7.05879	21.8724	29.6771	16.5323	199.833	178.534
EMC7	5.64201	5.28575	7.46141	9.04912	22.5288	14.9736
EMC9	0.441188	0.842191	1.20809	0.674025	30.1074	36.1351
EMD	1.86893	8.02941	12.0835	9.44624	26.4987	11.5477
EMG1	3.12826	15.55	23.5682	20.2003	143.024	129.948
EML2-AS1	0	0.0256688	0.224985	0.253926	6.74193	0.0359624
EMP3	16.4853	0.530494	22.3725	4.23198	17.6215	5.75746
EN1	0	0.0238777	0	0	7.60156	0.217791
ENDOG	0.539036	7.1593	9.81938	8.96324	18.5252	96.4445
ENDOV	0.104477	3.06129	2.85832	2.5225	5.4668	7.8033
ENO1	7.34561	11.4236	22.1833	9.47054	204.578	2613.95
ENO2	0.14831	0	0.245411	0.0756035	20.0612	46.0005
ENOPH1	18.4058	5.95305	8.64654	7.81086	17.2746	45.2546
ENSA	2.64958	33.9447	34.0359	29.6669	97.8023	52.03
EPB41L4A-AS1	3.52125	3.68796	7.157	4.30675	28.9759	9.4345
EPHX4	0.353986	0.118404	0.561477	0.134752	6.00444	0.484204
EPN1	0.675137	3.90214	4.79502	6.07857	11.4503	17.2541
EPN2-IT1	1.91756	0.788123	0	0.6563	82.9327	0.718669
EPS8L1	0.0705495	1.38827	1.43936	2.40841	28.5936	1.83093
EPT1	2.73482	4.64942	4.40078	4.545	5.75136	2.47446
ERBB3	0.0133361	0.00989645	0	0.011341	7.08577	4.42324
ERCC1	1.69876	5.55476	7.31991	6.32555	16.6815	20.3046
ERCC8	8.16456	5.76777	6.4158	5.47253	22.5472	6.72427
ERGIC2	352.674	65.2108	68.5728	71.6433	201.827	35.1219
ERGIC3	4.291	8.60848	9.52464	8.83663	15.2261	53.6287
ERH	38.7064	164.605	188.182	155.608	592.408	168.36
ERI3	8.2204	15.9658	23.4631	17.14	19.5089	137.648
ERRFI1	5.3658	8.13471	10.5531	7.174	12.2712	29.3662
ETF1	2.81121	2.74013	3.42762	3.76001	48.3329	101.826
ETFB	3.08956	2.91466	6.98157	6.42528	6.55257	91.0636
ETFBKMT	0.0195873	0.379814	0.82375	0.798142	8.08699	1.6523
ETFDH	1.24063	8.9207	7.79799	10.3203	6.35234	9.38647
ETNK1	5.66818	4.68125	5.81659	3.82551	22.1103	10.818
ETV3	3.7112	5.30826	3.5905	2.94195	19.8474	4.05016
ETV4	0.171026	0	0.112999	0	6.85326	67.6039
EVA1B	2.18384	1.86461	1.79728	1.41495	39.0209	6.06318
EWSR1	3.34089	7.61888	8.4641	7.58814	23.332	73.3548
EXD3	2.99586	28.5565	22.88	22.0711	8.37857	0.212272
EXOC8	0.683275	0.470879	0.680498	0.992337	7.01516	0.758413
EXOSC1	8.32916	22.1172	28.5402	21.7568	133.088	53.3939
EXOSC10	4.189	7.62534	7.6233	7.84073	10.7477	51.9945
EXOSC2	1.75178	5.433	6.95096	6.08704	44.7999	47.1538
EXOSC4	2.89775	3.52818	7.52005	3.23233	126.832	171.899
EXOSC5	5.73794	4.99191	7.82166	6.57271	53.1307	146.829
EXOSC6	0.273659	0.873227	0.725173	1.36661	13.8406	64.7109
EXOSC8	6.68763	26.9471	23.4163	25.5263	62.7002	200.731
EXTL2	0.437515	0.100484	0.364515	0.0914853	6.75321	1.62044
EYA3	5.25244	7.83941	11.8997	8.26149	21.0831	2.85161
EZH2	13.0579	6.59281	6.09256	6.30462	16.0617	38.1317
F11R	0.438852	0.97717	0.64177	1.00112	24.6681	29.1245
F2RL1	0.482511	0.123548	0.0287493	0	6.13076	25.1416
FAAP20	4.4719	5.87725	13.3144	5.01683	23.2609	56.075
FAF1	1.56521	7.12347	8.22334	7.7661	6.58212	88.9282
FAHD2A	4.94374	13.5365	15.6813	18.9996	19.7475	19.4384
FAIM	2.75365	6.83096	10.4855	7.40981	6.31301	14.9294
FAM103A1	48.2956	49.5166	43.6238	45.8062	120.829	68.671
FAM104B	10.4313	19.5275	22.1	20.3445	113.596	9.24969
FAM110D	0	0	0.117221	0	28.7733	0.0209651
FAM117B	2.98774	3.94474	3.86052	3.03403	11.0807	5.47511
FAM120AOS	8.07485	23.2865	25.0296	20.7151	21.5813	38.8753
FAM120C	1.75187	6.6746	9.49316	7.68356	5.43839	8.04802
FAM122C	0.777359	1.94916	1.80226	1.20658	34.181	5.70129
FAM127A	2.06908	2.70433	8.23487	3.59023	7.89463	76.3597
FAM127B	2.42069	3.72031	10.7985	4.91223	33.4373	48.9858
FAM133A	0.0119802	0	0.0504911	0.0532055	6.71251	0.62486
FAM133DP	5.16358e-06	3.17091e-05	2.71402e-05	0.557279	18.5252	2.65514
FAM13B	4.11942	2.17544	2.37838	1.71035	5.55351	2.46154
FAM151A	0	0	0	0	110.549	72.4018
FAM162A	1.78459	3.51747	13.1076	3.62015	62.5207	135.061
FAM162B	0	0	0	0	310.67	45.489
FAM168B	6.41553	8.0557	6.27539	7.83733	22.0499	11.1288
FAM173A	0.717544	4.33687	9.60067	4.43046	10.8687	62.0591
FAM173B	0.278108	1.45415	1.23892	1.21231	7.10253	1.71952
FAM174A	9.25324	3.58975	4.59509	5.32712	10.8334	7.56997
FAM177A1	20.3148	13.6368	16.2036	19.1858	47.8398	17.5963
FAM192A	6.19719	14.7432	14.2154	14.7761	13.4595	22.4127
FAM19A3	0	0	0.178414	0	28.6436	0
FAM200A	1.89697	1.04638	1.60124	1.59978	6.12493	6.20189
FAM200B	3.46984	1.66965	3.82907	2.03302	23.5381	4.09387
FAM207A	1.15181	4.39595	5.62485	5.65698	52.4588	31.1273
FAM216A	3.86728	0.832901	5.56444	1.46291	9.27133	13.7912
FAM218A	0	0.169353	0	0.0283647	7.23147	0.274278
FAM234A	0.722751	3.06675	2.64552	3.12249	5.82947	4.3263
FAM32A	2.5734	8.56522	11.1593	7.83035	466.849	140.329
FAM35A	3.67362	2.75835	2.69911	1.90816	15.9013	12.6211
FAM49B	8.30012	15.2662	18.1063	15.1122	18.8093	47.6699
FAM50A	1.58515	8.77288	10.8728	6.84867	6.25453	140.244
FAM53C	2.07022	14.9668	15.1634	13.2545	16.5141	11.0084
FAM58A	9.38289	25.1096	30.061	22.4304	209.751	60.6429
FAM60A	8.27141	4.67539	4.97798	3.93774	25.8185	98.6406
FAM64A	0.0285289	0.160459	0.115495	0.149333	6.79581	16.4349
FAM69B	2.60128	16.8044	21.0122	13.6614	7.4327	41.2431
FAM83D	0.282315	0.491598	0.48951	0.389219	5.43178	83.6378
FAM89A	4.59431	5.06623	3.40698	5.5687	17.3514	25.9659
FAM89B	1.78594	15.4271	13.7555	12.4866	43.699	27.0019
FAM96A	13.5854	35.1231	47.0336	38.0673	45.1964	243.988
FAM9A	0	0.263123	0.235467	0.127115	15.4317	0.21789
FAM9B	1.00889	0.53684	0.971619	2.30668	5.03964	0.492906
FANCB	35.3424	14.4232	6.68011	14.5755	130.541	25.712
FAR1	4.25903	5.56338	5.78719	6.00394	19.6736	13.1578
FARS2	3.63915	13.0335	12.2742	9.02243	7.61397	17.8799
FASTKD3	24.1202	14.3986	14.7081	13.7394	125.531	29.2873
FASTKD5	0.309944	0.934037	1.64063	0.451416	30.5306	21.6004
FAU	72.6857	161.372	258.628	240.674	4833.88	1063.46
FBL	1.81357	1.2328	3.76457	1.1772	99.6029	40.0654
FBXL12	2.42028	3.13542	2.90152	2.65214	27.0987	12.1197
FBXL3	18.8685	8.65334	6.99638	7.02592	23.6286	7.46205
FBXO22-AS1	1.24579	1.96949	3.96603	3.35601	8.63137	78.9656
FBXO28	6.45693	7.8822	7.36646	6.69384	14.212	16.2944
FBXO6	0.054959	1.16477	0.978103	1.69301	10.2046	14.2216
FBXW7	13.2104	3.61143	3.73527	5.85304	23.1702	6.29446
FCF1	1.15953	5.88202	6.13201	4.47072	6.24055	2.90837
FDPS	1.07249	2.97465	8.35865	3.44605	7.21227	153.371
FDX1L	2.50082	3.72002	5.99921	4.26372	65.9231	42.4292
FGD5-AS1	0.407493	0.110823	1.1926	0.157682	16.9113	12.6426
FGFR1OP2	50.6641	21.9617	26.5483	28.2822	161.127	26.4723
FIBP	2.30258	11.0197	14.8021	9.96382	14.6578	88.2604
FIS1	5.89642	9.88808	25.0227	11.4496	141.298	92.2271
FKBP1B	0.071734	0.258962	2.73676	0.299378	21.1963	20.2763
FKBP2	15.4057	25.8451	29.9156	42.9618	76.0684	94.2903
FKBP3	24.6411	7.81464	20.1281	6.74201	35.0641	124.285
FKBP4	2.09391	14.0793	16.2485	15.6629	26.6714	115.041
FKBPL	0.278621	4.63021	2.84419	1.85155	56.1699	10.018
FLAD1	3.54393	14.7257	12.0843	10.7073	15.4303	88.5983
FLJ25758	0	0	0	0	13.3804	0
FLT3LG	0.570748	2.65937	2.2907	2.75529	16.9797	0.702468
FMC1	3.16691	2.50588	7.32471	2.33177	14.1289	10.4641
FMR1NB	0	0	2.15984	0.203213	50.5877	20.3438
FN3KRP	0.646965	2.05886	2.53441	2.81252	5.15347	13.234
FNDC4	0.541496	2.69537	9.63773	3.62161	5.69618	19.2544
FNTA	11.8168	49.825	63.4825	56.886	25.1839	114.466
FOXD3-AS1	0	0.0897975	0	0.187101	16.7292	50.9278
FOXN2	0.64157	1.0914	0.46075	1.15021	22.0609	10.484
FOXR1	37.236	95.8245	103.675	113.674	1076.69	32.3811
FRAT2	7.04997	5.89253	5.47697	8.07297	150.947	377.724
FRG1	124.8	183.809	85.4423	131.554	420.694	57.9019
FRG1BP	2.7974	5.44428	2.32131	3.39648	21.4689	13.9066
FRG2	0.0374956	0.549746	2.41468	5.73734	6.65929	4.07306
FRG2C	0	0.186125	3.22741	7.67767	7.36316	27.0155
FRS2	3.39844	5.91008	8.26303	6.33983	15.9662	4.98221
FTCD	1.36187	49.6585	48.3652	41.1405	5.23034	0.350098
FTH1	74.1105	295.281	536.647	257.318	450.368	1059.92
FTH1P3	0.196743	5.53669	0.714672	1.90426	15.5046	20.0078
FTSJ3	2.81491	4.86315	4.69693	4.15694	6.61987	16.8185
FUCA1	11.7206	12.6998	13.4431	13.9691	23.6166	25.5816
FUNDC1	24.6898	11.1603	14.3044	15.9588	134.531	87.369
FUNDC2	1.08926	2.06639	3.30313	3.69761	29.2061	25.7142
FUS	1.17399	2.54884	2.04335	2.46057	7.04196	3.29168
FUT3	0	0.177486	0.0771705	0.102105	5.1114	0
FUT4	0.0694587	0.188168	0.347622	0.234216	6.6045	2.5268
FXYD4	0	0.20259	0.174586	0.283637	15.253	6.04047
FYTTD1	4.17324	1.98872	4.5141	3.39675	24.677	16.5549
G2E3	8.96983	6.47275	4.97182	4.97337	51.2543	14.3932
GABARAP	18.5981	37.1596	88.1114	41.4975	76.4233	234.588
GABARAPL1	1.86516	2.66312	4.26874	2.53167	46.986	19.9165
GABARAPL2	576.981	262.111	240.278	272.68	874.53	130.294
GABPA	17.2838	10.8715	11.4069	10.0654	71.7301	12.5094
GABPB2	1.79981	2.78441	4.34394	2.71403	5.53965	2.00151
GADD45A	1.59168	0.242687	5.80853	1.26319	63.7466	49.2745
GADD45B	0	0.308926	0.659535	1.77834	132.821	8.09943
GADD45GIP1	24.1252	44.4363	96.2918	66.832	387.027	506.921
GAGE12B	0	0	0	0.040956	14.685	40.2933
GAGE12J	0	6.77955e-20	0	0.00713005	6.77465	94.5053
GAGE2B	0	0	0	0.0175602	7.54639	28.1888
GAGE2C	0	0.0162645	0	0.0267396	9.01248	136.04
GAGE7	0	0.0152753	0	0.0236499	7.98141	3.17075e-05
GAGE8	0	0.0173957	0	0.00365034	21.0187	216.022
GAL	1.27999	1.14312	0.992458	1.23464	19.3134	50.3547
GALM	0.633842	0.433501	0.717005	0.593264	8.48654	12.8069
GALNT11	1.81995	4.13615	4.77918	4.09335	8.94122	3.81776
GALNT2	2.78756	3.79378	4.91353	4.6283	6.08971	3.08488
GANC	3.28375	5.8799	6.74099	4.75734	9.04212	4.29192
GAPDH	72.9337	122.904	349.929	162.493	184.249	2838.81
GAPLINC	0	0	0.2711	0.197583	7.95206	0
GAR1	8.75128	4.42244	3.1479	5.13631	44.1522	10.252
GART	1.38915	2.25876	3.29932	1.56996	8.67084	107.507
GAS5	35.6058	25.112	50.9192	35.6884	309.436	68.325
GAST	0	0	0	0.402261	5.0195	28.4371
GATA3-AS1	0	0	0.181446	0.10426	66.8414	3.16932
GATA6	0.0791295	0.05619	1.24526	0.141226	36.7876	20.465
GATA6-AS1	0.0296181	0	0.342672	0	6.22843	1.55182
GATC	0.0529895	0.170587	0.516035	0.128808	12.859	13.5777
GBX2	0.221569	0.390755	0.596729	0.512554	23.4547	4.85162
GCAT	8.54847	74.7102	90.6462	61.1006	31.4138	12.9509
GCFC2	3.51654	2.08703	2.73067	2.38779	21.2271	14.0691
GCHFR	11.4415	17.6432	15.9176	17.0373	129.529	51.3216
GCSH	0.584956	0.577964	3.53133	0.832752	21.1713	83.4167
GDAP2	2.99959	7.10879	8.38793	7.37415	12.1946	5.74942
GDI1	2.33915	9.43878	8.16731	10.7816	5.38898	16.383
GEMIN6	8.35097	33.8052	33.6206	32.9865	354.971	75.7298
GEMIN7	1.44642	12.2236	15.9887	12.2922	68.2935	94.8686
GEMIN8P4	0.156526	0.129901	0.569027	0.0372214	10.9775	4.28453
GET4	0.880838	2.44453	3.05123	2.44223	41.8671	110.357
GFER	0.375048	2.87708	2.57541	2.26131	9.90892	26.0871
GFM1	6.75858	8.28505	6.28791	7.05635	15.9522	30.2998
GFOD2	0.213509	1.27303	0.703233	1.5292	7.87394	6.06064
GGPS1	1.57498	5.23013	5.43746	4.49266	15.6098	12.565
GHITM	4.3537	41.6979	55.6576	37.3732	85.7075	588.596
GIGYF2	13.1294	7.17515	5.42626	7.91181	35.9196	6.79063
GIN1	1.83522	3.24295	3.35826	2.07875	12.4566	1.88136
GINS3	22.2781	26.2035	26.2376	29.1661	64.1028	55.9739
GIP	0	0	0	0.456117	148.011	2.50747
GJA1	10.5268	0.53726	14.6972	2.34231	29.9794	35.625
GLA	1.34544	3.87005	3.94643	3.97664	58.2411	39.8727
GLMN	8.91911	8.93	6.66992	6.79135	38.9314	26.5894
GLO1	14.1108	24.9483	41.7633	33.5592	77.5935	211.99
GLRX2	20.5382	8.88844	18.0257	10.3776	52.5389	71.4933
GLRX3	4.85775	14.7917	27.9253	21.0856	104.297	145.262
GLRX5	18.7347	38.5352	47.8453	41.2004	211.511	287.259
GLS	2.10265	1.63837	2.58879	1.62523	12.4157	14.1728
GLTPD2	0	0	0	0	7.2257	1.43493
GLTSCR2	16.9381	67.0203	85.6209	90.4134	180.572	79.2895
GLUD1	1.43748	3.09109	5.15968	3.0914	13.9477	34.0547
GLUL	1.23385	1.47904	0.879499	1.21636	52.3229	67.4608
GMEB1	2.42447	16.2382	20.5093	17.6638	7.15449	11.0613
GML	2.86021	18.3082	16.1323	12.2635	7.41102	0
GMNN	207.381	267.839	241.901	242.492	564.643	211.085
GMPR2	1.36288	6.6169	6.81769	5.62531	8.68114	27.0989
GMPS	2.54521	5.61533	4.59504	6.3995	26.0329	54.4333
GNAI3	11.6615	35.0549	38.1544	29.1434	42.8869	52.7089
GNB2	7.41603	18.0112	14.5383	19.0656	61.3301	36.4941
GNG11	0	0.373778	3.87965	0.368405	11.4531	0
GNG3	0	0.413922	0.81997	1.24341	33.1191	0.0694919
GNG5	137.346	197.472	255.56	232.452	622.065	138.275
GNPNAT1	0.566594	1.37157	1.93874	1.44582	19.4059	31.5168
GOLT1B	55.5588	61.2537	63.1294	63.0482	125.207	13.9637
GON7	0.506143	5.43549	7.80194	6.02949	96.2771	31.5908
GOSR1	4.96604	4.48478	5.69618	5.07106	14.076	16.9198
GOSR2	2.54425	32.544	30.5303	24.8668	143.181	43.2109
GOT1	5.00525	36.4691	41.8725	29.0232	11.2096	68.6615
GPATCH11	11.5032	5.69555	4.41696	5.45378	44.3461	2.02933
GPATCH2L	11.4076	4.96248	3.92536	3.90756	22.0771	10.6047
GPATCH3	1.67149	2.92115	3.75375	3.87823	48.3355	15.6772
GPBP1L1	11.0802	22.802	23.6923	24.4481	27.6229	42.0129
GPCPD1	9.40415	6.21884	5.13159	6.60283	15.3146	12.0974
GPKOW	0.879617	23.0837	25.2863	22.6856	10.3159	14.9854
GPN1	4.56658	37.9971	39.3514	37.3239	43.9422	76.309
GPN2	0.773592	18.2623	19.6643	16.0281	24.1089	30.5562
GPN3	56.803	45.3105	49.7157	39.7922	174.635	96.6876
GPR155	0.302414	0.258517	0.0879446	0.175416	8.26047	0.00392031
GPS1	0.596022	7.37437	8.99786	7.48205	16.4452	134.469
GPS2	11.1208	75.8229	77.7017	68.8277	151.602	153.945
GPX1	10.5238	38.6122	63.1616	52.8355	210.845	246.298
GPX4	11.7093	2.71733	46.9584	12.3529	615.688	478.628
GRB2	1.12771	0.192877	0.704528	0.208782	81.9453	65.3131
GRINA	0.765281	5.09086	3.64822	4.83174	6.13345	6.02444
GRPEL1	51.3567	116.487	101.104	105.042	121.254	100.466
GRPEL2	15.1858	8.86175	7.26466	7.29191	33.6661	12.3485
GRSF1	5.84793	7.40977	9.28666	7.9006	24.0879	51.1858
GRWD1	1.33517	3.89226	5.52787	5.13762	51.9667	95.9541
GS1-124K5.11	4.10359	4.05798	5.74713	3.47686	74.0798	12.4655
GS1-124K5.4	0.955672	1.0501	1.46894	2.05513	17.489	1.96686
GSC	6.56041	17.7265	19.3889	20.6772	31.3682	5.37617
GSK3A	2.6728	8.97313	11.4608	11.6435	5.8033	9.63687
GSTM3	1.57861	23.1752	39.7757	34.2248	29.5062	2.40136
GSTP1	8.13807	12.0838	50.1403	29.6518	38.3689	2448.95
GTF2A1	1.5085	0.625278	0.739685	0.710117	9.95896	3.41671
GTF2A2	182.516	92.377	86.6918	85.1034	1045.67	151.901
GTF2B	786.393	178.453	167.217	169.817	400.981	51.1952
GTF2E2	3.78104	7.25996	9.23622	7.16291	202.201	89.6201
GTF2F1	10.7043	10.668	7.39502	7.93729	15.9793	14.341
GTF2F2	124.379	109.16	100.671	116.739	270.014	87.0969
GTF2H1	21.7614	20.4697	17.0853	18.2279	63.0871	37.0853
GTF2H5	2.12543	2.65157	2.83647	2.37004	10.3499	6.48133
GTF2IP12	0.314217	0.634652	0.416516	0.675982	13.8536	0.315694
GTF3A	8.72023	15.6272	41.0123	16.2412	70.1731	170.374
GTF3C2	1.3596	10.0309	10.6168	9.48845	6.02231	32.7381
GTF3C5	1.52754	9.89197	12.6732	11.8374	11.0221	12.2398
GTF3C6	7.21831	22.4523	34.9456	25.108	436.12	176.819
GTPBP3	0	0.371067	0.199971	0.282723	5.8903	19.7437
GTPBP4	5.89018	6.03437	6.44305	5.6068	82.8187	108.64
GUF1	5.97312	3.61287	3.79178	2.97398	6.0274	10.9965
GUK1	9.1522	12.9838	46.5605	13.6352	74.671	249.773
GUSBP1	0.367451	2.322	2.7382	1.65638	128.662	4.65341
H1FNT	0	0	0	0	66.1054	0
H1FX	0.718965	0.159662	1.60284	0.170936	12.0834	68.1576
H2AFB1	0.145449	0.063024	0	0.0199606	10.1984	0.570708
H2AFJ	0.358876	0.224649	1.98571	0.3736	6.13344	10.2043
H2AFV	1.92972	4.75469	8.46072	4.42926	344.661	98.408
H2AFX	7.13774	33.8449	46.5121	42.2178	45.0847	65.2905
H2AFZ	9.07219	2.46292	41.0594	8.47638	12132.1	1437.11
H3F3A	7.06928	9.77334	12.2337	12.1385	18.9143	9.43151
H3F3AP4	39.4468	73.9187	75.0013	82.165	610.807	167.264
H3F3C	3.55828	69.6312	11.0282	46.1287	22.6533	33.538
HACD3	2.57977	0.653818	1.4793	0.902288	21.0013	16.3605
HARBI1	0.74407	1.89379	1.87834	2.11065	5.89069	3.09446
HARS	1.49696	10.8223	13.5026	12.3283	11.3418	84.2987
HAT1	65.02	66.8317	81.8658	65.4543	482.488	186.94
HAUS2	1.02566	3.0707	2.42115	2.01961	77.9168	20.6881
HAUS3	8.42544	5.03543	3.87078	5.10283	27.6075	18.9031
HAUS6	2.24789	1.20719	1.5237	1.58459	6.70657	9.77471
HAUS8	7.40616	85.7322	71.767	65.1705	32.2623	42.8541
HAVCR1	0.164818	0.321012	0.468003	0.426488	6.77677	16.3655
HAX1	7.36402	16.8197	25.595	15.675	52.201	190.672
HBA1	0	0.100715	0.466598	0.11555	8.4146	41.6695
HBA2	0	0.050472	0.280627	0.115822	9.43709	57.0228
HBS1L	8.11587	4.12331	7.03142	4.55549	32.3843	15.8407
HCCS	3.79421	17.3682	14.9444	15.5359	70.1671	79.9855
HCFC1R1	12.3915	38.252	38.1567	37.6088	24.8047	65.1125
HCG16	0	0	0	0	6.32223	0.0512765
HDAC1	3.97099	6.16734	7.3279	4.33937	23.58	99.0112
HDAC2	3.77479	3.62946	4.63078	4.53772	39.236	49.0654
HDAC6	0.0633715	0.203777	0.67355	0.280909	7.46955	3.9878
HDDC2	1.1404	3.64614	6.33848	3.73442	29.9309	59.2092
HDGFRP2	1.73106	25.283	18.3355	17.6893	14.1084	15.2177
HDHD3	0.63114	8.37505	9.57235	8.80913	16.2535	44.4389
HEBP2	4.68281	2.89046	12.0202	2.82818	35.693	66.8299
HERC5	7.18836	3.14264	2.57744	3.80774	8.18826	18.2372
HERPUD2	2.47323	5.76945	5.49918	6.19829	5.01537	2.73076
HEXIM2	0.882962	14.3889	16.2577	9.99593	16.3844	13.2486
HEY1	0.62282	0.536548	1.01727	0.591099	8.5079	0.0151588
HEY2	7.0084	21.1233	22.9193	18.7112	15.3469	13.6316
HGS	1.02648	4.16053	5.94452	4.00107	7.68449	30.7125
HHLA3	0.390103	1.04352	3.37441	1.28587	8.1478	9.61468
HIPK3	3.17557	2.00846	2.89459	2.39735	40.7786	3.69593
HIPK4	1.25515	19.4205	14.6794	18.0197	7.77008	0.010855
HIST1H1B	0.062875	0.142251	0	0.469164	9.43129	23.269
HIST1H1C	0.96319	0.813382	5.31277	1.99727	50.0166	45.2112
HIST1H1E	1.81194	131.169	68.1932	82.9382	25.7437	64.1701
HIST1H2AC	0.107278	2.12317	2.83037	1.25002	106.362	17.1815
HIST1H2AE	0	0	0.414723	0	5.22381	1.82066
HIST1H2AG	5.42161	11.0361	13.0611	12.368	24.4508	2.30873
HIST1H2AI	0	0	0	0	14.4715	18.5733
HIST1H2AJ	0	0	0	0	12.4293	25.6359
HIST1H2AL	0	0.74876	1.37948	0	12.3425	1.49592
HIST1H2AM	0	0.194937	0.260341	0	181.956	9.69811
HIST1H2BB	0	0.138283	0	0.316972	10.2691	0.218262
HIST1H2BC	1.51034	3.07831	3.72999	1.37603	494.036	5.34544
HIST1H2BD	0.320497	0.413335	0.125046	0	32.3761	7.53378
HIST1H2BG	0	0	0	0	37.6555	0.610131
HIST1H2BH	0	0	0	0	141.096	5.58
HIST1H2BJ	1.97473	7.06373	5.57817	6.61447	19.6581	0.820986
HIST1H2BK	24.3608	88.9969	111.202	81.7923	296.37	31.5722
HIST1H2BL	0	0	0	0	7.93466	0.589588
HIST1H2BN	2.25935	3.07757	1.48935	1.84008	9.59538	2.76288
HIST1H3A	16.5254	61.8539	53.7125	40.6953	59.8413	1.29069
HIST1H3B	1.18839	2.1364	3.83558	1.01131	9.6005	2.124
HIST1H3C	0	0.062583	0.286988	0	16.4811	1.97042
HIST1H3D	8.81435e-07	0	0	0	20.2581	2.3317
HIST1H3G	26.034	148.557	196.3	136.421	432.789	11.1298
HIST1H4C	7.13725	0.931544	6.90319	0.842867	74.2138	1634.73
HIST1H4E	0.462371	0.692865	0	0.697375	7.27104	7.43117
HIST1H4H	7.3784	25.7595	28.6899	18.743	41.1343	0.582491
HIST1H4J	8.43465	7.15476	8.49374	5.36293	25.6446	9.45603
HIST1H4K	8.11369	8.70591	9.98641	6.44875	25.2964	7.48503
HIST2H2AA3	1.24975	4.80264	11.8992	5.71749	343.546	17.3128
HIST2H2AC	1.88283	7.18755	4.47295	2.30984	11.3606	21.8213
HIST2H2BA	1.17288	10.8412	9.29033	11.0511	6.1109	0.315685
HIST2H2BC	0	0	0	0	6.54232	2.11094
HIST2H2BE	0.209464	0.923802	0.808512	0.930763	7.55201	0.0535335
HIST4H4	0	0.223289	0	0	5.48927	1.80695
HK2	2.00608	1.48395	1.69197	1.5638	6.3349	5.48365
HLA-F	0	0	0	0	8.47541	46.798
HM13	8.45313	27.3229	25.0044	27.26	19.7427	43.0429
HMG20B	10.5912	20.9422	24.2893	22.7949	28.1192	57.7173
HMGA1	13.8529	58.8802	72.3312	66.0965	85.3258	1048.11
HMGB2	235.057	204.899	138.489	167.376	516.519	270.949
HMGN2	41.9261	178.134	189.449	170.686	121.202	401.87
HMGN4	37.1202	25.2766	28.0632	24.4399	184.13	70.2258
HMOX2	2.83912	14.1674	12.7213	10.2262	66.0879	101.511
HN1	6.67995	26.9413	38.4948	26.2721	253.295	333.829
HNRNPA1	66.372	54.9615	49.3244	56.3674	133.076	210.72
HNRNPA1L2	20.4019	26.9959	28.762	29.5853	51.8312	75.4841
HNRNPA2B1	8.87194	10.3519	9.58907	10.6838	186.155	172.024
HNRNPA3	2.07924	1.62075	2.26004	2.1233	7.2316	9.79112
HNRNPAB	4.3331	2.25778	4.89891	1.97818	81.0326	159.578
HNRNPC	32.7762	50.8533	50.273	42.6882	193.081	261.464
HNRNPCL1	0	6.6879e-06	2.35244e-05	3.0827e-11	99.5298	0.578855
HNRNPCL2	0	0.0820968	0.202101	0.895334	190.475	10.9765
HNRNPCL3	0	0.0528775	0.239031	0.000101541	142.01	1.94972
HNRNPD	10.4987	13.8424	12.0662	14.4472	48.56	53.2722
HNRNPDL	7.51363	11.8288	16.409	14.4865	141.866	84.3252
HNRNPH1	4.74475	5.54291	7.29893	7.0929	70.8925	40.3207
HNRNPH2	16.4637	4.50201	15.3465	7.86993	30.6376	73.2103
HNRNPK	10.3565	11.6496	16.1077	11.1173	53.1974	116.382
HNRNPL	0.897181	0.434464	0.785631	0.563395	5.41554	9.39827
HNRNPLL	2.84288	1.50059	1.62418	1.52594	9.40441	18.1113
HNRNPM	3.18182	5.57135	5.34525	7.27923	23.8608	114.291
HNRNPR	8.88673	4.88305	5.01999	5.82076	11.8681	39.5829
HNRNPU	10.3321	16.344	13.1552	14.1131	37.9605	62.6213
HOTAIRM1	0.162204	0.254117	0.26622	0.651114	16.1262	1.18114
HOXB6	0	0.0441826	0.105265	0.0378728	5.75758	0
HOXC10	0	0.0205594	0.221162	0	6.10797	0.0158109
HOXD1	3.24924	3.3872	1.88499	2.85142	6.02893	0.695488
HPS1	0.888882	1.63153	1.8745	1.93153	6.47217	31.1697
HRAS	0.763419	3.67212	6.99781	5.31707	24.0206	56.4567
HRAT5	0	0.564846	0.24274	0.263072	5.98573	0
HS3ST6	0	0	0	0.116656	6.10336	0.602853
HSBP1	25.319	68.5546	99.9726	79.3623	198.856	145.056
HSBP1L1	0.932105	0.138972	6.25536	1.84581	8.33125	18.4541
HSCB	3.71056	4.00929	6.80928	6.16268	16.7373	33.4428
HSD17B10	15.8887	19.7029	25.9563	23.1366	40.5264	283.038
HSF2	4.14314	3.46726	3.88462	1.88971	7.88523	6.97957
HSPA13	2.60542	3.61357	3.69447	2.74951	6.60686	6.89565
HSPA14	20.3313	27.4711	31.4204	33.4246	102.498	112.806
HSPA2	0.0877949	2.00894	2.09505	2.73462	15.3712	14.675
HSPA5	10.5249	31.2469	40.4897	30.064	50.3253	68.4117
HSPBP1	4.11995	7.2527	9.95213	8.32076	62.0853	79.4528
HSPH1	23.3911	6.93266	7.71706	6.20017	13.6678	53.227
HTRA2	1.98186	3.35888	3.67727	5.50224	7.86128	24.66
HUS1	0.231442	3.2311	4.87452	2.3603	9.87941	84.8254
HYAL2	2.6497	9.12988	9.05387	7.24047	8.04895	27.3042
ID1	0	1.4796	0.969787	3.35898	62.2242	51.8864
ID2	6.13887	4.96415	7.88846	8.11856	50.1418	39.1981
ID4	0	0.0557051	0.212547	0.0305321	11.0202	4.53099
IDH2	1.25202	41.1641	42.9528	39.5903	18.5975	3.6803
IDH3B	1.60346	2.20526	1.26635	2.19552	15.0596	131.453
IDH3G	3.21847	8.44088	12.7647	9.34175	14.605	70.1812
IDI1	12.1342	31.7653	37.1201	24.1147	160.21	76.0324
IER3	0.82869	1.87391	1.93438	1.56523	124.983	14.3907
IER5	0.0911959	1.97774	1.38228	1.69192	73.2528	11.9586
IER5L	0.198479	1.15383	0.963254	1.03683	8.61359	0.638374
IFI27L1	8.42252	23.6619	22.8272	29.4961	17.3505	6.05803
IFI30	0.056551	0.297177	1.30376	0.78842	65.9072	20.7398
IFITM1	0.125948	0.0736325	1.0335	0.05342	5.50542	1639.38
IFNGR1	4.9931	2.24611	2.47359	2.52726	10.9475	10.8627
IFRD1	10.8738	8.09427	8.30868	6.46922	28.1268	22.7493
IFRD2	0.394527	0.080145	1.59052	0.248945	6.31006	100.818
IFT20	8.3614	6.29399	14.8703	8.84029	154.106	51.0651
IFT22	7.33687	16.9563	15.5763	12.7978	48.7291	11.6452
IFT52	6.1593	55.1324	70.0212	57.1273	17.9281	26.0788
IFT80	0.398175	0.733819	1.19388	0.969596	8.91492	1.74521
IGFBP2	11.6286	26.9806	25.1344	57.1414	33.3103	42.3191
IGFBP6	3.97563	12.988	20.0549	22.3991	17.8278	1.49536
IKBKG	0.1822	0.300874	0.30129	0.379499	7.66984	13.6114
IKZF5	2.65343	2.26833	3.26287	2.19281	15.4152	5.99331
IL13RA2	0	0	0	0	17.4854	0
IL17B	35.6219	167.441	264.531	264.125	216.633	0.683538
ILF2	71.2687	213.143	221.778	190.754	467.354	509.649
IMMP1L	126.233	43.3025	49.2926	52.3843	111.891	9.08028
IMP3	7.19296	27.604	29.639	30.9779	394.618	279.628
IMP4	0.562802	5.47881	6.22141	5.65308	55.9766	84.8799
IMPACT	3.93303	3.06447	3.57896	3.60588	8.83483	6.86606
IMPAD1	2.47916	0.815125	1.3974	1.47231	5.20163	8.39299
IMPDH1	0.146983	0.361725	1.0004	0.833474	37.3895	41.5964
INAFM1	1.21679	1.63339	4.66111	1.33573	25.5703	6.44153
ING1	3.14507	6.80044	4.94455	5.68953	21.1906	16.5132
ING2	13.5865	4.85825	3.66428	4.80487	78.821	9.45859
ING4	1.36584	2.24524	4.87527	1.9968	7.67371	7.68774
INIP	7.77043	9.32044	11.2307	7.155	28.0476	6.54519
INO80B	0.174729	1.01595	2.00862	0.664252	21.3821	4.26363
INO80B-WBP1	0.107328	0.555271	0.507513	0.358458	6.05103	4.66413
INO80C	11.5986	18.4491	24.3756	18.955	154.398	20.9983
INPP5F	78.3612	36.0198	21.8919	31.9814	137.923	27.4794
INPP5J	0.28608	2.58709	2.86309	2.91028	16.1349	0.188421
INPP5K	0.89921	5.65017	6.39281	6.28688	6.96519	14.8514
INSIG1	36.8339	16.7009	11.8644	15.3198	30.7178	14.6908
INTS4	0.753196	1.35673	2.3293	1.44572	6.25676	10.6389
INTS6-AS1	0.397327	0	0	0.331968	8.66296	0
IP6K2	4.87704	20.9932	22.4375	20.5746	27.9999	88.2468
IPO11	0.266951	0.0778825	0.0609346	0.232872	9.38717	8.20176
IPO5P1	0.0090084	0.0758026	0.0597581	0.13395	7.06009	1.29793
IPO7	4.94811	1.95237	3.05579	2.48099	5.40297	8.88926
IPP	1.00203	1.499	1.45746	1.41714	5.57424	4.89203
IQCJ-SCHIP1	0.376514	0.0097409	0.160019	0.0583925	8.93413	7.91057
IREB2	2.20598	3.87103	5.13719	4.42847	5.3126	10.842
IRX3	0	0	0.0369585	0	6.93055	0.0249733
IRX5	0.0705182	0.031201	0	0.222819	18.8831	0.269422
ISCA1	4.93653	7.01934	10.6236	6.52822	51.1233	54.6502
ISCA2	2.82283	2.02371	11.8663	2.28114	26.1199	82.6864
ISCU	6.69412	38.8822	48.7888	41.8025	136.398	113.694
ISG20L2	0.112054	0.043669	0.896491	0.127061	11.7384	26.0886
ISL2	0	0.217651	0.0925899	0.091246	5.39493	0
ISOC2	3.84045	27.1977	31.3171	23.472	11.7435	48.0827
IST1	2.83731	4.14855	3.41509	3.70856	18.5396	36.242
ISY1	0.442713	2.00311	2.32403	1.95013	44.8552	21.3768
ITGB1BP1	3.95135	12.1333	21.9451	14.0105	15.5312	30.0282
ITGB1BP2	0	0	0	0	6.10386	0.875215
ITPA	9.98199	26.7858	36.6077	25.7915	21.3227	157.869
IZUMO1R	2.53722	57.8884	54.8251	52.2452	8.17742	0
JHDM1D-AS1	0.0648105	0.0703455	0.0357458	0.0770885	10.2728	2.15652
JKAMP	2.74964	1.21909	3.58609	2.92556	253.941	20.5924
JMJD8	1.08978	1.24026	2.58945	1.72659	5.43758	37.0568
JOSD2	3.74035	6.16495	13.696	10.522	13.6087	13.0097
JUNB	1.5718	0.0851176	2.6943	1.23177	48.816	44.1508
JUND	0.744058	8.53208	9.13552	11.2415	7.57194	55.8687
KANSL2	22.3417	29.5157	31.6201	26.3289	48.1178	56.0279
KARS	3.77686	16.1192	19.9003	16.139	41.513	221.078
KAT14	1.73903e-08	0.305005	0.303391	0.476397	5.25498	9.10942
KAT8	2.90361	7.91333	8.26249	8.95538	7.35212	15.8179
KBTBD6	1.42263	0.275159	0.383705	0.654265	6.00727	1.76667
KCCAT333	2.55851	2.1378	1.18852	2.8953	23.5987	0
KCTD6	0.511403	0.0264556	1.37079	0.164439	74.2056	26.8815
KDM4C	0.766363	1.57652	1.22899	1.59976	22.54	7.33319
KDM5B	3.20476	1.37824	0.994398	1.39318	18.1297	13.2933
KHDC1	0.198217	0.804593	0.441623	0.371793	100.09	11.9292
KHDC1L	0	0.756606	2.18726	6.1289	27582.5	2948.07
KIAA0391	0.294422	0.150624	0.244521	0.513699	23.7095	25.2929
KIAA0907	2.11136	1.29076	1.34161	1.06431	10.6183	7.44139
KIAA1143	4.26605	2.02951	1.88851	2.21139	39.8877	4.94023
KIAA1191	5.17246	9.39082	10.4815	10.0857	103.856	23.7357
KIF22	0.787219	15.4488	13.625	12.4548	18.1108	114.847
KIFC1	0.209104	3.43955	2.94337	2.30177	6.95249	4.59551
KITLG	0.0731755	0	0.313309	0.0488369	21.4282	0.254749
KLF10	0.294724	0.33389	1.12357	0.305382	15.9735	20.0255
KLF16	0.848496	1.45396	1.10339	2.3958	7.54211	1.76531
KLF17	0.0126567	0	0.0799748	0	76.352	14.3376
KLF3	0.0087158	0.00747043	0.187808	0.0414885	12.3567	9.42072
KLF4	0.423484	0.209124	0.203257	0.062119	15.9634	40.4766
KLF5	23.9911	17.8513	15.3649	19.6974	55.3038	27.3819
KLF9	0.018846	0	0.0312351	0	6.43727	0.452167
KLHL11	13.0301	5.35729	5.64654	5.90393	12.7278	1.22778
KLHL15	12.0834	7.86492	7.36669	8.14906	30.3853	1.5085
KLK11	0	0	0	0	289.05	0
KLK8	0	0	0	0.211694	6.87741	14.6248
KLRB1	0	0	0	0	8.84207	0
KLRG1	5.33923	4.04805	3.69977	3.80771	12.3608	1.93747
KMT5A	5.74237	5.21151	4.47276	4.65146	15.5631	3.73309
KMT5B	9.21485	2.60269	4.03703	2.77978	13.327	13.6194
KNSTRN	54.1028	121.096	129.931	122.077	124.283	76.5725
KPNA1	1.26336	0.785197	1.0882	0.559153	7.78817	12.8235
KPNA2	30.7224	482.815	536.592	414.198	554.809	455.743
KPNA6	5.83322	5.00632	5.7029	6.35375	15.8003	7.92072
KPTN	0	0.13806	1.05614	0.084502	91.9745	5.77771
KRAS	1.40034	0.285021	0.381993	0.43936	35.053	24.4794
KRBOX1	7.97431	15.3458	20.1036	15.9461	102.027	6.10364
KRBOX4	0.330301	1.06993	1.24276	0.951946	14.5579	2.01189
KRT10	4.62746	1.9888	5.87989	1.98175	298.706	28.0482
KRT8	1.85296	0.108743	1.07131	0.614743	5.4639	1166.79
KTI12	0.46962	2.10235	1.55806	1.42037	28.4941	62.9008
KXD1	5.54765	19.3705	24.3105	16.3464	17.9209	188.641
L1TD1	0.100722	0.30821	0.0212302	0.0721613	10.1862	93.3251
LAMTOR1	2.77305	11.6149	21.0187	12.1665	18.0568	160.753
LAMTOR3	23.0803	36.4535	39.8804	31.835	156.463	18.2327
LAMTOR4	22.7945	56.2783	65.5493	47.34	171.98	231.05
LAMTOR5	102.349	63.3837	80.6559	87.1462	1008.14	262.914
LAMTOR5-AS1	0	0.310466	0.22587	0.278878	8.83085	0.770027
LAP3	2.4827	4.20125	6.53542	2.94945	27.7547	66.4522
LAPTM4A	74.5175	103.082	126.351	102.212	210.182	51.2101
LARP1B	23.5698	24.4744	20.6547	25.3873	59.0436	23.7325
LARP6	1.34029	0.873605	2.97452	0.752223	33.266	109.34
LAS1L	2.37262	3.9179	4.80589	3.34496	6.1106	45.4331
LBH	0.198026	0.10551	0.341983	0.352444	19.1804	16.6652
LCLAT1	2.09172	1.89056	1.82679	1.67915	5.64727	3.01798
LCMT1-AS1	0.646275	1.38447	2.02543	0.974699	6.68785	0.275971
LDHA	11.3761	25.4521	58.8838	27.2329	709.731	710.004
LDHB	8.38177	0.906971	23.5601	3.36073	312.276	1627.55
LDOC1	3.6601	21.1739	23.2571	22.1195	8.97498	11.4548
LEAP2	1.00728	1.04283	0.752376	0.833163	10.3215	6.97931
LEMD3	0.868334	1.20111	1.05471	0.677902	5.14349	1.81539
LENG1	1.52896	4.54838	2.1249	3.43804	37.7383	28.5159
LEUTX	0	0.641237	0.806532	5.51384	832.674	12.1103
LGALS1	153.609	372.937	602.436	578.87	386.663	88.1157
LGALS4	0.501463	6.24245	8.89638	7.933	14.6727	1.09246
LGALS7B	0.41598	0.755974	0	0.354602	5.53958	3.00034
LHB	0	0.340243	0	0.625274	14.5196	0
LHFPL3-AS2	0.224476	0.339492	0.524093	0.350255	11.2777	2.83464
LHX2	2.96303	11.471	8.42293	10.6294	7.90174	0.0111963
LIAS	4.51362	4.11803	2.63958	3.16421	73.064	20.1426
LIN28A	1.78491	3.72748	4.29138	5.77378	12.0499	64.5911
LIN37	1.95911	28.916	26.0705	30.8667	7.13265	17.6421
LIN7B	0.630054	7.05779	8.21567	9.35614	5.89799	1.68461
LINC00116	1.62397	1.43823	3.17408	1.69298	5.97886	7.20928
LINC00221	14.5868	23.9004	20.8443	20.6358	33.3775	7.77144
LINC00324	0	0	0	0.0109561	6.00584	0.0277798
LINC00337	0.195875	1.1488	1.18657	1.43399	8.04015	5.18042
LINC00493	14.1143	8.0243	23.0484	18.3372	284.873	112.118
LINC00624	0	0	0	0	8.19875	2.58459
LINC00680	0.873565	0.208215	0.250685	0.554859	33.3552	2.98003
LINC00863	5.34528	5.4791	5.38537	6.75273	42.9457	5.2507
LINC00935	0	0	0	0	10.2935	0.0729365
LINC00998	8.22671	4.69463	20.7746	6.30328	267.563	44.9853
LINC01030	64.882	34.3025	20.2435	21.9587	44.1224	1.61726
LINC01224	0.655378	1.04304	0.989824	1.03083	10.9017	3.2775
LINC01420	3.65448	0.55723	21.0652	1.7157	12.9947	14.0576
LINC01474	0	0	0	0	30.6565	0
LINC01481	1.87129	0.612075	1.27328	0.924215	64.4274	3.09278
LINC01518	0	0	0	0	8.91116	0.219132
LINC01578	12.3105	8.26256	11.2937	10.9949	26.5832	35.4575
LINS1	3.4205	5.12127	3.99552	3.10244	24.9002	7.11182
LIPT1	6.7146	6.81198	7.02822	6.3461	39.4168	13.1402
LIPT2	0.616648	3.44686	4.135	5.16822	9.50859	7.20735
LLGL2	2.92686	15.1796	19.1466	18.0264	6.05578	41.8652
LLPH	13.7609	1.58702	8.82278	2.34606	427.925	99.9506
LMBR1L	1.2691	6.69992	6.40547	3.75354	12.1216	1.03027
LMNA	4.02775	4.47389	6.71361	4.5828	17.2351	58.7034
LMNB1	2.32424	7.85708	9.70745	7.925	6.08177	9.84501
LMO4	3.64164	7.56245	6.00757	6.43517	7.91477	11.9843
LOC100128108	0.143238	0.630637	0.335904	0.390157	5.41155	0.0420093
LOC100287015	0.788551	1.52629	1.80007	1.58963	6.89855	2.7849
LOC100287497	0.624331	3.31473	3.9635	4.17654	6.63842	2.05101
LOC100289361	0.263213	0.564203	0.538149	0	12.4455	1.45107
LOC100294145	0.527021	1.77601	2.61868	2.50929	8.6614	3.25061
LOC100421746	0	0	0	0	10.491	0.174423
LOC100505771	0.88841	1.775	1.89326	0.6182	6.71577	4.17647
LOC100506082	14.0138	28.9249	28.4054	38.7772	42.8063	0.72032
LOC100506100	3.56676	6.99216	5.7616	6.59277	16.5757	12.7948
LOC100506548	0.837631	0.987084	0.806805	0.743345	11.9761	1.68918
LOC100506790	0	0	0	1.51374	876.532	18.5666
LOC100507053	0	0.12845	0.0169069	0.068044	5.81443	0.0114124
LOC100508631	0	0	0	0.0971915	6.01886	1.32463
LOC100996249	0	0.291791	0	0.289851	29.8476	0.665177
LOC100996324	0	0	0.404043	0.14666	119.903	1.84616
LOC100996842	0.603707	5.98126	4.78918	2.96324	22.9961	5.50297
LOC101059915	0	0.0133584	0	0	5.67199	1.31777
LOC101559451	0.136395	0	0	0.068699	6.77313	1.47479
LOC101805491	0	0.0385814	0	0	6.37169	0.429094
LOC101927151	0.952185	1.20189	0.982149	0.76383	7.7637	2.11893
LOC101927365	0	0.0263178	0.475798	0.137294	7.60883	0.349152
LOC101927418	0.637655	1.76039	0.343405	0.840907	74.8431	0
LOC101927420	0.122831	1.50425	1.64926	1.07573	22.3273	1.36313
LOC101927571	1.54408	0.423191	0.484253	1.05872	6.11177	0.347214
LOC101927746	6.68773	6.25718	6.7118	4.8952	16.9549	90.7169
LOC101927755	0.245793	0.139424	0.39224	0.0855281	73.5454	3.52807
LOC101927765	0.444856	0.855109	0.805973	0.236087	13.9472	0.602084
LOC101928000	2.32953	1.56098	4.64188	1.95516	61.7692	11.5138
LOC101928043	0	1.24748	1.07183	0.8715	5.34066	0
LOC101928053	0	0	0	0.0097398	5.2413	0
LOC101928259	0	0	0	0	6.31103	0.190156
LOC101928464	2.42759	2.33564	2.24312	1.56282	24.3748	5.40654
LOC101928523	0	0.22089	0	0	43.335	0
LOC101928697	0	0	0	0.154807	37.2358	8.36978
LOC101928767	2.05437	5.47935	1.84637	2.77508	5.15062	0.0909545
LOC101928769	1.77718	1.05299	1.3231	1.34852	65.1639	0
LOC101928844	0	0	0	0	8.46593	0
LOC101928917	0.665208	4.44593	3.83876	3.54849	8.31086	2.08424
LOC101929128	30.374	72.249	52.6621	66.1298	156.512	71.753
LOC101929243	2.01361	2.46862	3.90619	2.95391	31.0104	1.92877
LOC105369340	0.684965	0.29275	1.11135	0.405151	11.5252	5.6149
LOC105369980	0	0.248702	0.3821	0.0488873	11.0357	0.390457
LOC105371743	0.34278	0	1.10429	0.386631	337.106	21.1312
LOC105373368	0	0	0	0	15.757	0
LOC105373383	0	0.3424	0.638975	0.271251	14.4879	1.87879
LOC105376736	0	0.303694	0	0.587735	20.7575	2.75676
LOC105376955	0.255943	3.63671	1.92051	3.41748	15.8442	0.055997
LOC105377213	0	0.0551105	0.250375	1.10083	448.988	0
LOC105377590	1.13134	1.77749	0.268351	0.795418	11.0046	0
LOC105379183	0	0	0	0	7.18457	0.0721895
LOC145694	0.0359614	0.150834	0.176552	0.23777	9.28535	0.117767
LOC148413	0.292083	1.19209	1.00523	0.916513	7.43436	2.92414
LOC220729	0.083806	1.07126	0.847949	0.45368	5.36346	4.39053
LOC285074	0.544241	1.80395	2.52337	1.73504	9.14423	17.879
LOC375196	3.58295	6.28017	5.99099	4.33552	10.8795	1.22302
LOC389906	2.04364	0.798166	0.537479	0.911865	7.71974	17.5979
LOC440434	1.04564	2.23723	2.37958	2.6231	11.7343	12.6964
LOC441052	0	0	0	0.0439697	26.2945	0
LOC441601	5.35374	15.2055	17.5457	17.4511	46.3905	20.1249
LOC641746	0	0.0188693	0	0	7.3076	0.320229
LOC642361	1.43659	2.21383	2.36536	3.17888	34.5037	5.08517
LOC644656	0.198844	0.498505	0.0819381	0.263597	6.76941	2.93165
LOC645513	0	0.429317	0.31838	0.379862	10.0227	36.5215
LOC653653	1.36873	2.11598	3.46186	1.46924	6.09732	3.38697
LOC728024	2.60594	8.87697	6.42986	5.49362	7.01718	3.96296
LOC728485	0.305434	0.516657	0.600064	0.457237	25.1221	4.7062
LOC728554	20.9723	64.1027	60.5951	64.726	49.059	101.273
LOC728752	0.077369	0.136892	0	0.045982	11.0934	1.37844
LOC729083	0	0.849224	0.552166	0.563994	37.3912	0
LOC729739	0	0	0	0	6.12599	2.74162
LOC730183	0.363756	0.663708	0.593829	0.497964	6.54572	1.73731
LOC730202	0.426594	0.920322	1.59017	0.674053	69.3577	0.922158
LPCAT4	4.72047	110.627	103.484	84.0513	10.6159	12.4513
LRIF1	11.3425	8.76038	7.04128	7.2444	23.1345	11.099
LRPPRC	4.01175	1.68948	2.07267	1.61441	11.6584	50.9481
LRR1	13.9048	101.47	101.131	89.7018	82.2844	71.3611
LRRC38	0.540045	6.32169	7.69665	5.50864	5.84401	0
LRRC57	2.37525	3.18443	2.46292	2.91064	12.6752	10.9516
LRRC59	1.96182	22.2996	22.1383	20.3383	40.5755	46.581
LRRC75A-AS1	42.1391	61.3638	97.8682	59.0108	249.81	367.81
LRTOMT	1.3938	5.63966	5.00117	4.45235	14.2831	1.78006
LSG1	1.89908	0.820991	0.625397	0.954318	15.609	24.0344
LSM1	22.8733	14.5564	26.6309	23.5299	708.578	137.701
LSM10	11.0282	43.0226	43.3312	32.2821	266.214	153.815
LSM12	1.27891	4.01468	3.07154	2.94078	34.0635	29.5608
LSM2	17.8169	25.2938	37.1511	34.9742	286.92	180.543
LSM3	17.8521	94.5354	118.709	123.166	645.936	399.262
LSM5	15.3053	12.6155	19.1115	13.2319	40.2804	53.3436
LSM6	7.60614	17.9886	21.1335	13.1132	39.5134	127.695
LSM8	4.27341	3.08654	3.68512	3.35483	7.46157	2.85392
LUC7L	2.2629	2.27362	2.49957	1.54263	35.6092	48.1371
LUC7L2	7.58835	9.37152	10.8668	9.72048	36.8447	66.0143
LUZP4	0	0.126733	0	0	8.90475	2.24967
LY6G5B	0.12926	0.315049	0.533346	0.435542	6.83299	1.4966
LYG1	0.355469	0.206414	0.0975259	0.121574	6.30495	1.86614
LYPLA1	8.96738	2.88249	7.22057	4.48269	58.3462	122.237
LYRM1	2.56666	11.5599	10.3592	12.2931	24.7789	17.8331
LYRM2	10.1686	3.27536	5.99851	3.579	11.0192	7.74151
LYRM4	4.75652	13.1878	13.2906	12.1693	56.9716	40.7224
LYRM7	0.186103	0.28288	1.11288	0.429937	6.47516	5.70927
LYSMD4	0.324151	1.50832	1.07874	0.589306	5.26499	1.70172
LZIC	35.9267	28.9734	22.6686	23.0846	87.3578	33.1225
LZTFL1	2.94166	2.95735	4.34937	3.1753	8.01695	3.20949
MAD1L1	0.886674	11.4171	11.4683	9.65347	5.39951	16.253
MAD2L1BP	13.4637	28.6226	25.613	23.669	490.05	92.4784
MAD2L2	30.8619	41.0836	42.709	33.4333	121.126	184.463
MAF1	3.81718	10.1686	14.7321	14.1231	16.773	157.915
MAGEA12	0	0	0	0	33.8017	0
MAGEA2	0	0	0	0	33.709	0.296726
MAGEA3	0	0	0	0	41.4808	0.00812345
MAGEA4	0	0	0	0	27.9561	1.53537
MAGEA6	0	0	0	0	47.1621	0.0081302
MAGEB1	0	0.607838	0.103042	0.111216	5.58005	6.49871
MAGEB2	0	0	0	0	36.3758	22.7609
MAGOHB	4.83911	6.50312	7.22561	5.80701	39.1791	23.2602
MAGT1	4.08402	4.72128	4.89805	4.67056	9.09315	3.37231
MAK16	11.0908	11.1167	12.9847	10.5028	52.6554	27.846
MALAT1	38.3952	3.56684	3.45233	3.23679	32.9853	519.95
MALSU1	24.6863	20.9078	26.524	19.883	334.57	173.358
MAN1A1	2.0506	4.41451	4.57691	5.06705	6.25856	0.389906
MANBAL	0.601053	2.2546	4.26173	1.74302	24.848	18.0974
MANEA	3.21129	1.27182	1.60226	1.77198	26.8458	2.45082
MANEAL	0	0	0.0708738	0.00094493	7.55613	4.40381
MAP1LC3B	116.153	70.8215	70.8893	66.0898	629.162	76.0447
MAP1LC3B2	108.899	80.1042	75.5527	88.7766	696.104	89.467
MAP1S	2.40964	12.3482	13.4096	11.5634	6.76832	17.8422
MAP3K13	18.1644	5.54282	7.51202	6.70233	36.4253	5.23413
MAP4K2	0.421488	1.07218	1.02976	0.991337	7.53378	8.15817
MAP7D1	1.68775	13.583	11.4541	11.0372	5.72658	3.53579
MAPK1	5.77093	9.60928	13.6106	14.1407	25.0366	22.7373
MAPK1IP1L	6.83964	4.51537	6.20417	5.62868	22.5592	44.0354
MAPKAPK2	1.30032	7.62744	7.22465	8.28331	9.46729	0.994648
MAPKAPK5-AS1	1.27799	2.45283	2.61436	1.78419	39.0776	8.51027
MAPRE1	67.3308	28.8549	37.39	34.6242	144.789	117.785
MARCKSL1	2.15229	2.46639	6.12937	3.44532	37.1949	317.955
MARS	4.06637	8.30438	10.9207	9.82456	11.0596	139.175
MARS2	0.775711	0.692423	0.729945	0.443273	5.18309	4.92664
MASTL	16.8973	10.237	9.62621	10.9967	22.4251	12.4954
MAT2A	12.3791	41.7874	43.4842	41.4117	130.546	60.3495
MATR3	5.53439	1.86974	3.66261	2.04	98.1332	62.2882
MAX	11.4112	60.7154	60.2797	50.764	141.306	35.9353
MAZ	5.70677	7.45207	6.65315	6.99094	14.0483	84.7483
MBD1	0.293305	0.980842	1.09427	0.786817	5.38234	8.08332
MBD2	3.45329	1.76021	2.10344	3.18758	12.9618	17.4773
MBD3	0.593346	0.189824	0.636742	0.527656	7.34546	101.089
MBD3L2	0	0.808905	6.50016	14.3629	2993.64	45.4112
MBD3L3	0	0.868918	4.37421	9.90054	1600.61	36.9654
MBD3L4	0	0.46181	2.70466	5.86486	970.893	22.9087
MBD3L5	0	0.443532	1.90328	4.85044	833.256	16.4227
MBIP	139.407	199.672	182.324	172.697	293.135	31.7284
MBLAC1	0.028472	0.068957	0.476719	0.22352	6.05987	2.9882
MBNL1	3.35293	3.73209	3.75628	3.42033	6.78988	2.05097
MCAT	1.55947	14.6928	13.5786	12.8963	11.1735	29.3929
MCEE	0.194827	0.15685	1.49018	0.827875	5.13009	14.2555
MCFD2	1.542	1.08675	2.08565	1.00828	8.49737	7.29609
MCL1	1.3292	1.85292	1.78441	1.39039	69.4949	59.9892
MCM7	3.10048	17.5297	18.0935	14.2925	15.3602	129.425
MCOLN1	1.40464	6.35785	7.513	7.87857	5.05086	5.46812
MCRIP2	6.63079	6.93529	13.6998	6.83339	39.3494	78.2433
MCTS1	0.706155	3.29845	3.65151	2.90678	16.2285	14.551
MDM2	1.88821	2.97739	3.35649	2.75803	8.53898	12.4253
MEA1	4.61956	17.3407	23.2189	17.0309	117.746	183.008
MECP2	1.55709	6.81261	6.30943	7.38991	8.80621	10.3149
MED17	1.62343	0.59293	0.544813	0.339427	10.7894	15.6997
MED18	1.21548	7.44829	5.10272	5.76335	8.65581	15.8918
MED21	156.919	118.374	111.682	79.3709	219.002	23.2687
MED26	1.27214	1.14443	0.837131	1.18697	11.9174	1.69807
MED28	0.985008	1.27082	2.62842	1.51872	180.624	50.7256
MED29	0.445775	4.2084	5.2136	3.95309	19.9383	14.7921
MED31	0.86958	0.0696234	1.81724	0.268981	331.163	7.07325
MED4	7.01006	6.20985	8.98151	8.48628	176.75	57.0853
MED6	41.0206	24.6073	27.9449	26.8523	277.873	28.6681
MED7	5.89973	34.7486	25.9187	28.0324	321.705	33.7084
MEIOB	1.02598	0.80453	0.666766	0.649548	6.75166	0.765729
METAP1	2.66986	6.8328	7.60299	6.51748	16.2953	29.2276
METTL1	1.35037	10.4475	11.0876	8.51759	64.1993	40.3666
METTL10	0.389269	1.54259	2.33935	2.23882	52.1531	12.8001
METTL16	1.46497	1.52927	1.73291	1.39437	5.47199	8.32789
METTL18	6.03936	12.9313	13.5339	11.4574	41.0237	9.24033
METTL22	3.35717	9.75918	10.7618	9.75052	12.4849	15.2372
METTL26	2.3524	6.1003	17.5777	9.30596	27.3008	109.733
METTL2A	0.531275	0.146368	0.285739	0.266843	6.75173	25.5914
METTL2B	0.978194	0.874543	1.78775	0.911466	17.6168	30.196
METTL4	1.81307	2.50127	4.1668	3.18727	17.5862	6.19672
METTL6	4.67284	6.62352	6.83027	7.22299	28.8029	14.8548
MFAP1	63.0887	50.6976	42.1998	40.9866	179.22	45.3772
MFAP3	1.22069	1.47506	1.59669	1.16044	21.3432	4.03787
MFSD11	1.09908	2.5352	3.4145	3.64216	18.2519	3.32109
MFSD14B	18.0745	3.80098	4.32216	2.69083	39.2873	12.0544
MFSD14C	3.98149	11.6663	16.4863	20.3454	186.49	17.9991
MFSD2A	8.66512	31.5504	24.8278	22.8756	72.1108	0.959402
MFSD5	1.16885	12.7662	8.41349	10.955	10.8285	28.6242
MGAT2	8.03688	4.96995	6.30526	5.80818	13.7364	7.41798
MGC72080	12.1627	226.016	250.528	211.471	28.4497	37.5823
MIB2	0.346584	1.20366	1.05338	1.18544	7.66809	4.40064
MIEN1	2.02176	5.49417	10.3349	4.51013	56.6633	54.0203
MIF	49.7895	33.0633	225.961	71.4801	1210.4	3149.55
MIF-AS1	0.121126	0.0405111	0.727717	0.187738	18.0593	10.0308
MINCR	0.339045	0.319869	1.45871	0.238581	9.69066	0
MIS12	3.82949	9.28742	8.77665	7.50415	11.025	14.8021
MKKS	3.16369	1.65598	3.71704	2.25038	32.1882	46.0409
MKRN1	6.01506	22.2728	28.5191	24.3144	304.065	135.227
MLF1	23.5549	81.3003	84.4685	76.3855	105.264	10.0906
MLF2	12.891	15.6423	30.2251	23.1902	201.946	414.709
MLH1	1.89532	3.49742	3.42199	2.59627	7.92725	13.2502
MLST8	1.28649	2.77888	4.85833	2.28281	6.17671	90.8862
MMADHC	3.61289	3.42236	13.4774	3.39691	485.471	184.12
MMP24-AS1	0.898217	1.23149	1.38468	1.44736	11.4195	3.02922
MOAP1	1.81031	3.11665	3.48015	3.63505	10.4434	6.31691
MOB1B	0.654897	3.20059	3.23886	2.45118	12.9906	1.99998
MOB2	0.744371	10.2544	8.81901	6.24511	34.8417	27.57
MORC3	3.432	2.49742	4.46244	3.18338	21.8864	21.1102
MORN2	24.9671	71.6711	88.5001	75.7695	113.933	12.7227
MOSPD1	22.6383	14.8021	22.783	13.5319	273.002	38.6086
MOSPD3	3.536	11.0138	12.0425	12.144	10.0642	18.4225
MPC1L	3.86842	2.33971	1.21213	1.04292	17.6033	2.55005
MPDU1	1.39322	2.02429	3.39535	2.6306	7.55135	38.9114
MPHOSPH6	25.8831	81.0117	116.064	114.855	141.664	95.0573
MPLKIP	11.8257	6.3696	11.4239	7.54101	200.755	117.576
MPP5	9.30889	3.43978	3.56468	4.301	13.9007	1.61955
MPV17	4.10419	22.8288	27.9677	24.5729	47.3917	50.6033
MPV17L2	0.330774	7.37648	6.55718	7.34253	24.119	146.218
MPZL1	1.26567	3.49052	4.03508	3.64606	14.4695	25.4502
MRFAP1	9.56212	61.5725	72.01	59.2212	108.973	136.437
MRFAP1L1	4.67471	30.4981	35.5547	25.8733	63.0333	95.9149
MRGBP	2.54786	19.714	18.5555	17.2386	8.85637	21.6887
MRLN	0	0	0	0	557.557	0.326495
MRM2	19.1805	40.3145	28.5975	30.0827	46.3174	111.193
MRM3	0.954725	5.91917	6.88139	6.27234	32.1416	57.1433
MROH1	1.92325	7.47569	8.08349	8.59653	6.34915	1.44411
MRPL1	8.85713	3.01548	5.14768	3.72205	131.544	41.8118
MRPL11	2.12495	17.6117	18.4313	14.8369	22.3101	111.617
MRPL12	2.61373	5.64811	10.499	4.99034	401.412	593.646
MRPL13	67.0423	24.3499	43.1956	39.0337	275.889	217.532
MRPL14	10.1344	18.3782	38.1299	27.1718	431.865	405.418
MRPL15	5.26189	12.3587	22.3778	11.9564	103.027	228.25
MRPL16	6.42931	1.61664	7.4794	3.33713	234.755	265.704
MRPL17	1.34058	2.00819	4.46094	3.16678	42.627	56.6807
MRPL19	6.89339	7.90913	8.87385	9.2218	20.5858	27.5563
MRPL20	8.42611	124.758	145.9	124.45	2048.16	569.576
MRPL21	51.3889	31.9354	18.6228	22.9053	387.354	313.36
MRPL22	2.89226	27.6825	29.1118	35.2803	114.14	46.872
MRPL23	11.9262	9.27403	29.259	19.7244	55.3359	240.299
MRPL27	3.91874	19.0328	20.3196	14.2215	196.652	301.442
MRPL28	1.82797	1.7934	5.34272	0.992681	26.0576	220.777
MRPL3	17.5464	42.8334	57.4256	43.9436	56.3188	216.695
MRPL30	13.6225	9.08114	8.66994	9.41538	25.7512	11.1751
MRPL33	6.24364	11.5424	38.9004	10.7954	306.486	173.584
MRPL34	19.435	21.7644	33.7404	22.7898	190.775	361.646
MRPL35	31.8587	30.4908	22.4425	26.5099	88.9826	31.7978
MRPL36	10.6456	92.7432	81.1367	64.9446	70.3829	354.589
MRPL37	15.4026	52.3586	58.4674	58.98	42.0802	297.44
MRPL38	1.52658	5.9158	7.22671	5.15031	9.85081	245.66
MRPL39	35.0147	33.4182	31.8992	38.5981	144.038	215.3
MRPL40	12.3775	26.3979	37.5644	36.6183	68.5368	78.8143
MRPL41	12.3064	49.6532	65.6361	47.1471	1938.63	403.004
MRPL42	8.51657	8.64323	13.8107	6.28263	61.3909	103.12
MRPL43	35.4288	51.9999	69.3179	56.4131	266.995	97.311
MRPL45	1.6396	16.2415	14.6622	14.0018	34.1945	80.3907
MRPL45P2	0.0464956	0.813323	0.972137	0.55492	7.88907	3.40396
MRPL46	6.05145	15.6012	11.1259	14.6637	160.071	148.075
MRPL47	9.45909	19.0275	30.4337	20.8563	284.971	192.101
MRPL48	2.37997	4.20458	5.78069	2.75278	143.614	133.48
MRPL49	0.501865	2.0846	2.56993	3.22166	10.7712	114.558
MRPL50	68.9033	92.0641	72.6365	70.687	638.438	211.328
MRPL51	15.0925	22.4281	46.0632	28.8882	312.703	382.832
MRPL52	8.69937	14.9977	21.5982	14.5095	124.073	80.8455
MRPL53	56.7671	51.8985	50.4793	58.8681	180.685	52.4885
MRPL54	1.4701	4.42668	9.95575	4.67763	40.183	116.129
MRPL55	28.5162	104.975	113.588	123.824	346.74	213.632
MRPL57	3.73846	4.85522	6.89871	3.76896	78.6593	74.8928
MRPL58	4.21927	14.1822	14.7152	14.5585	110.28	98.5842
MRPL9	5.38049	11.5872	12.0422	10.9151	26.5333	126.61
MRPS11	8.64632	11.6827	12.8708	11.1166	39.3969	38.1944
MRPS12	2.10615	11.2721	19.7101	9.18595	184.323	337.004
MRPS14	18.0406	21.7807	20.3113	21.9194	64.2131	37.2993
MRPS15	4.34612	12.0555	22.6977	15.0881	179.851	289.346
MRPS16	11.9174	13.5983	15.5915	16.0045	25.3883	67.6128
MRPS17	5.44226	4.39734	16.1094	4.18262	420.82	195.879
MRPS18A	2.49832	21.9076	20.0926	16.2595	105.548	217.083
MRPS18C	21.5154	9.5495	14.588	12.7032	287.217	53.6311
MRPS2	0.882491	11.0355	13.34	9.16717	17.31	197.903
MRPS21	34.1446	72.0109	70.4198	69.7294	290.667	84.2453
MRPS22	2.86952	36.4641	39.2909	24.5302	121.189	99.9258
MRPS23	14.013	11.243	15.3418	12.0221	243.281	242.374
MRPS24	60.2996	52.6195	83.8538	65.0997	356.66	272.714
MRPS25	5.0819	19.0654	20.3734	24.0105	19.1867	55.8704
MRPS28	62.3387	37.1523	41.7569	38.7715	296.748	108.39
MRPS30	8.32727	7.34908	8.31189	6.05748	89.4628	130.428
MRPS34	16.6671	18.6597	15.5913	15.3203	141.897	345.087
MRPS36	3.99749	1.16549	3.7734	1.80011	5.67674	40.7386
MRPS7	6.23505	22.1334	30.0357	26.9038	173.608	249.629
MRRF	11.2755	47.8133	47.9087	40.1794	34.9641	27.2472
MRS2	4.64248	6.86877	8.10804	6.35262	25.0259	179.81
MRTO4	13.036	29.3178	30.144	31.2738	87.6332	89.9694
MS4A3	0	0.099008	0	0	8.91151	0.0457487
MSANTD2	0.128056	0.05398	0.121268	0.0538855	5.68307	7.24068
MSL3P1	0.254063	0.194088	0.739033	0.104222	51.0149	5.56478
MSMB	0	0	0	0	38.9192	3.57391
MSMO1	15.7743	12.494	20.3748	14.461	47.8121	59.0117
MSRB1	0.68395	0.967913	2.58961	0.286913	17.8514	35.0473
MSX1	4.03085	11.7632	10.9059	11.5915	13.0246	4.70245
MSX2	7.08287	10.7544	11.2868	11.4486	31.1888	148.735
MTCH1	1.85723	5.22183	9.56666	8.32868	18.8477	143.155
MTCH2	7.90567	30.9893	31.1831	29.0075	21.3343	86.941
MTERF1	0	0	1.28781	0.223566	68.238	20.9152
MTERF2	0.82516	2.34903	3.10469	1.78036	7.08792	6.25578
MTERF4	1.69349	3.58113	2.38228	1.8141	29.4203	22.5791
MTFR1L	1.70069	14.2736	14.7093	10.7014	9.54978	57.5091
MTG1	1.38215	1.9351	4.66795	1.32253	10.4565	89.0651
MTG2	1.3601	5.8628	7.35799	6.73462	12.0981	12.5442
MTHFD2	1.76947	1.55795	11.7579	3.0788	39.0779	110.203
MTIF2	25.4031	14.287	12.6036	12.1974	30.2199	44.4442
MTMR14	0.483536	8.15166	9.65879	9.05615	18.823	63.641
MTO1	1.11883	2.95954	3.13655	2.67992	8.33028	16.9744
MTRF1L	1.97444	2.35526	3.60734	1.97413	13.6398	7.75748
MTX1	2.12972	3.75855	3.83527	2.61146	11.9129	61.3554
MUC3A	3.03691	10.1697	11.1381	10.4348	6.0853	0.76046
MVB12A	1.81115	2.11364	2.62224	2.68314	14.9117	33.0139
MYBL2	5.23707	18.2767	17.1324	16.5796	45.2829	535.947
MYC	0.0434855	0.0670355	1.15121	0.0709283	85.6485	30.978
MYCBP	12.6924	41.322	41.0232	44.5932	77.4129	49.4278
MYCN	0	0.107512	0	0	10.8163	114.291
MYDGF	35.4348	57.0945	67.4439	79.7985	108.198	107.415
MYL12B	335.244	185.78	266.867	180.506	433.601	407.397
MYL6	52.2584	25.0412	268.159	56.6033	511.349	760.019
MYL6B	2.0388	3.64177	11.2197	6.41637	6.98862	37.5997
MZT1	28.2071	19.5986	21.7558	21.5681	199.529	37.1662
MZT2A	16.2102	30.237	43.0382	41.5851	32.6874	82.2306
N6AMT1	3.62536	0.913678	1.32849	0.773377	26.4201	22.2746
NAA10	2.44605	7.13286	11.7369	7.36087	48.4011	169.215
NAA38	22.6464	39.9316	44.2612	46.3723	84.5596	46.9109
NAA40	1.24642	3.36316	2.47968	2.6614	8.99079	7.62515
NAA50	6.72581	16.8208	18.7173	14.4418	44.6686	97.1402
NAA60	1.65088	11.8634	12.4547	10.9401	16.1562	24.4416
NABP2	4.41213	4.11428	3.87255	3.73421	8.28676	0.61395
NACA	95.4487	120.42	219.283	141.404	1483.71	1065.59
NAF1	3.83672	7.01668	4.57287	4.78732	28.3084	10.0763
NAMPT	3.59828	5.79601	6.63851	5.67614	10.0029	14.6873
NANOG	0	0	0	0	17.6689	149.734
NANOGNB	0	0	0	0.085399	719.716	1.83964
NANP	0.998742	2.68654	2.45297	2.49398	7.67824	6.97559
NANS	1.11147	1.6864	4.57554	1.95833	75.0235	62.7604
NAPA	14.103	43.6546	42.3029	40.1236	50.9105	129.238
NARF	3.58407	69.0306	62.3012	49.3376	81.0601	119.284
NARS	11.397	36.4374	41.0729	35.5345	30.5679	188.686
NAT6	0.094263	6.48399	5.20447	5.41509	10.2929	8.18825
NAT9	0.14508	1.47165	3.25191	1.22907	10.3344	21.9707
NAXD	1.03199	11.1422	14.369	12.8969	7.84478	20.9616
NBEAP1	0	0.144228	0	0.471954	30.6547	0
NCAPH2	0.203484	1.67453	2.31445	2.05793	13.413	27.1158
NCBP2	51.8393	34.1069	35.4009	36.8427	233.339	191.892
NCBP2-AS2	1.04171	1.69564	3.70945	1.97677	253.286	109.801
NCK1	3.5982	3.48327	3.83354	3.06416	50.9109	14.6639
NCK1-AS1	2.94657	4.74662	3.22568	5.7879	45.1683	3.59371
NCL	65.5054	68.427	53.5606	56.932	140.375	421.924
NCOR1P1	0	0	0	0	32.5954	0.0606085
NDUFA1	24.7662	19.676	37.6139	28.8504	1643.38	436.781
NDUFA11	20.0038	46.0373	88.6167	76.8032	144.659	353.144
NDUFA12	26.7669	43.0472	61.6228	37.4036	220.647	302.933
NDUFA13	190.222	308.382	395.967	395.498	889.222	574.289
NDUFA2	5.90483	24.8	31.4473	32.4251	545.636	201.756
NDUFA3	25.3442	36.9373	49.0805	45.9457	453.223	243.844
NDUFA4	14.9662	19.9257	32.4675	29.5453	148.333	79.082
NDUFA5	1.26697	4.71854	9.41271	5.92869	15.9767	27.3194
NDUFA6	187.764	261.296	281.909	290.998	506.078	263.628
NDUFA6-AS1	1.527	2.51694	3.24982	2.60331	12.7468	0.688705
NDUFA7	8.30049	30.8609	60.7196	30.5682	126.386	117.812
NDUFA9	7.34863	19.1382	24.4413	20.3239	58.4819	157.215
NDUFAB1	480.584	439.435	588.23	671.127	1202.6	1472.66
NDUFAF1	12.53	9.20844	13.2725	12.9964	27.7901	51.7011
NDUFAF2	19.5515	8.26701	9.42595	10.6304	57.7233	15.8193
NDUFAF3	4.3122	12.4514	19.0278	16.2662	11.0855	63.7244
NDUFAF4	38.0583	42.6319	47.8196	40.7901	108.278	64.6603
NDUFAF5	0.512444	1.58798	1.14908	1.29706	18.4015	19.4381
NDUFAF7	4.7651	7.42811	5.13828	5.64077	53.1213	44.0395
NDUFB10	21.3205	79.3666	102.714	99.6071	329.038	427.411
NDUFB11	5.25964	6.68714	13.6935	9.78136	358.814	174.083
NDUFB2	87.0797	171.332	242.148	218.697	313.576	541.108
NDUFB3	4.51286	12.1533	21.1503	24.6057	205.901	113.322
NDUFB4	4.91017	9.30249	26.1605	20.2982	110.577	131.185
NDUFB6	62.8282	30.8408	65.5695	71.999	387.813	223.077
NDUFB7	32.5703	61.4117	97.2123	77.8515	723.322	454.325
NDUFB8	118.567	292.092	375.551	399.339	275.35	524.704
NDUFB9	104.107	308.46	417.188	455.334	607.572	426.241
NDUFC1	12.3987	50.3473	54.5365	66.9282	94.2264	157.156
NDUFC2	4.90409	6.86799	13.3966	12.4054	54.2856	124.163
NDUFS2	2.19045	16.0582	20.2932	11.8492	21.6194	127.578
NDUFS3	14.6799	40.8274	53.761	63.4693	70.7407	230.496
NDUFS5	22.9416	14.9687	77.6308	32.1762	139.1	693.183
NDUFS6	22.0855	30.0819	46.9125	38.0954	87.319	481.224
NDUFS7	4.566	12.942	21.43	20.2434	30.3386	268.394
NDUFS8	19.19	32.8286	64.1945	30.6709	60.5772	185.44
NDUFV1	1.43763	3.92961	4.4267	4.46885	16.2457	313.586
NDUFV2	18.6878	8.16615	15.5975	11.8585	57.9775	90.6951
NDUFV3	7.17586	19.9085	15.0663	18.6949	17.7854	26.132
NEDD8	71.5114	142.953	167.675	165.158	384.236	533.523
NEFL	1.04645	2.33689	1.46989	1.59499	5.68217	4.37498
NELFCD	1.0156	5.2222	5.16301	5.23642	8.12725	48.6898
NELFE	0.92825	6.65497	11.0926	5.93391	93.0904	51.4398
NF2	0.635355	3.07889	2.38762	3.82786	23.6037	26.0676
NFATC2IP	7.02359	4.26426	4.14363	3.77805	16.2698	20.631
NFKBIB	1.45523	1.99067	2.2459	4.64416	5.32073	19.7205
NFKBIL1	0.5859	0.537219	1.26075	0.401072	15.8176	4.41617
NFYA	2.61255	1.63384	1.38502	1.53099	7.22299	2.097
NFYB	14.0402	9.43795	11.8858	9.54118	63.6925	29.7344
NFYC	8.29459	55.1162	49.7006	46.8616	51.3651	49.3406
NGDN	248.499	252.143	208.491	242.82	797.63	138.228
NHP2	8.45632	35.0566	65.1536	42.1953	1486.94	409.779
NIFK	72.9573	43.6675	45.6455	43.1668	203.614	149.664
NIP7	18.6906	13.5805	13.1368	12.5195	174.754	66.6838
NIPA2	13.7253	11.2399	11.269	11.3859	41.065	60.0137
NIPBL-AS1	0.0164097	0.0735917	0.0304707	0.0328163	5.04068	0.422999
NKAPP1	0.432317	0.160758	0.351059	0.074982	5.16187	1.74838
NKIRAS1	3.35857	5.52355	4.09919	5.21752	98.382	8.59014
NKRF	0	0.0071978	0.0255304	0.0183417	6.74364	11.1896
NKX2-5	0	0.0104788	0.0528778	0.076104	9.73319	0.0168502
NLE1	0.259528	0.146525	0.177719	0.449862	11.5421	7.18246
NME1	10.2708	11.0389	32.7091	16.9849	68.4352	543.809
NME1-NME2	6.66594	5.84504	8.30711	14.3437	13.7017	36.307
NME2	63.9915	70.0626	146.216	86.8863	240.815	830.378
NME4	2.95818	21.8204	27.5566	16.5594	9.11922	62.5642
NME6	3.99744	2.74571	3.21675	3.24378	16.8971	23.851
NMNAT1	2.17146	1.6139	0.525178	1.65677	40.7129	4.53401
NMRK2	0.751654	11.4087	11.0948	14.7533	16.0736	4.23679
NMT1	0.124126	0.262816	0.216431	0.267089	10.6118	19.3325
NMT2	0.234911	0.0422204	1.76707	0.237545	5.37453	2.48699
NOB1	5.65489	32.3229	31.5123	31.4126	65.1371	61.0877
NOC2L	0.394861	0.675882	1.54906	0.735128	9.944	44.6694
NOC4L	0.269124	2.5622	3.71446	2.25034	36.3761	62.4811
NOCT	1.35068	3.75219	3.00961	3.1021	10.9914	4.46472
NOL11	8.99223	2.42465	4.11759	3.1902	161.017	64.4619
NOL12	5.1133	38.4965	30.659	31.2241	91.4916	23.0628
NOL7	115.327	52.2075	43.5216	46.7901	337.86	321.855
NOL9	1.3547	1.16018	1.41217	0.994575	17.313	4.73327
NOLC1	19.8881	17.6479	18.4697	19.4194	56.9442	105.908
NONO	0.528538	1.02114	2.0923	0.754964	40.7111	113.267
NOP10	1456.2	775.375	520.512	529.366	3304.66	491.298
NOP16	13.6993	17.0712	19.0955	14.4106	360.855	337.642
NOP2	2.31794	16.5935	16.4358	12.3063	13.0173	38.9269
NOP58	160.495	66.7134	69.6803	69.6529	311.252	230.608
NORAD	0.172373	0.055651	0.288966	0.0709286	10.3246	4.74359
NOSIP	2.81261	12.2088	15.8138	13.5749	246.54	132.933
NPAS1	1.80533	39.1001	46.6941	38.2672	11.1611	2.8651
NPB	0.184706	0	0.302693	0	81.2574	9.08587
NPIPB6	0	0.0315076	0.0214436	0.0569778	8.70008	0.808458
NPIPB8	0	0.079659	0.164398	0.0576627	14.6255	1.01981
NPIPB9	0	0.0877189	0.150096	0.103832	16.7832	1.22268
NPLOC4	0.672427	1.77813	1.91543	1.7817	5.83332	31.0372
NPM1	302.135	287.737	251.722	287.503	600.543	658.189
NPPC	0	0.349824	0.13266	0.671385	25.9327	0.413129
NPTX2	0.074999	0.716143	0.74486	0.579187	13.974	0.25904
NPW	0.344249	0	0.472359	0	8.33599	0.92284
NQO2	0.741145	1.55442	3.18336	2.12327	5.0548	124.566
NR1D2	0.790978	0.247706	0.435471	0.25913	7.16945	2.92924
NR2C2AP	2.80351	13.6534	14.4606	12.5517	12.6598	22.5982
NRAV	0.764519	2.57845	2.97928	2.78789	38.4284	2.33526
NRBF2	14.2493	8.65863	4.84719	9.47261	215.093	101.234
NRF1	0.132443	0.763003	0.954704	0.775196	8.54919	8.10967
NRGN	0.182375	0.207439	0.380672	0.702176	9.65249	8.90202
NSA2	23.357	13.4032	16.8366	14.1808	419.856	47.6311
NSDHL	0.85618	37.0682	32.3732	25.4456	34.6809	36.3845
NSMCE1	4.19039	10.3683	17.813	12.1502	15.0398	25.724
NSRP1	38.718	15.3571	15.1736	16.7643	49.5365	16.4852
NSUN3	3.68555	7.07554	5.79723	3.17634	18.2386	4.13094
NSUN5	1.68519	9.18117	8.26433	8.67806	11.5453	45.9363
NT5C	2.49854	4.42615	7.2942	5.44412	11.4627	79.4949
NTHL1	14.4458	39.2264	62.8901	62.0584	37.1989	57.9648
NTMT1	0.397983	6.54954	5.5323	4.50465	107.687	158.716
NTPCR	2.72621	11.2472	12.297	6.80901	12.9116	54.8165
NUBP1	1.277	6.41922	5.31806	5.22069	13.291	28.0783
NUBP2	1.31704	5.33979	6.50866	3.14486	106.149	143.504
NUDC	4.73106	28.9161	33.6765	25.4117	141.482	181.136
NUDT1	1.58862	5.08075	5.51379	6.85123	74.5237	98.3769
NUDT14	2.48418	15.8889	14.8735	18.816	5.77494	11.403
NUDT15	15.0298	10.135	13.04	11.797	80.6215	106.07
NUDT16L1	1.06205	7.02459	10.1055	5.75599	32.6107	72.1414
NUDT2	5.14328	12.4357	16.8079	12.8711	75.9394	16.3021
NUDT22	0.58802	0.495651	2.32483	0.159245	7.67374	72.6381
NUDT3	6.27862	30.6412	30.4429	25.7227	36.0354	27.8507
NUDT4	1.22318	1.25139	0.727137	1.16258	5.93609	8.36805
NUDT4P1	10.4663	5.51414	6.35326	6.60856	44.9638	85.6771
NUDT5	7.17456	17.668	24.712	21.7479	30.133	71.0122
NUDT9	1.91745	1.16961	0.849884	1.13657	7.82368	8.81466
NUP153	7.18227	8.50451	8.13835	9.15742	17.8704	7.19755
NUP155	4.11562	5.27332	5.82182	6.0744	12.1626	5.83129
NUP50-AS1	0.126493	0.430567	0.626229	0.184043	8.22514	7.45998
NUPL2	59.7046	29.7573	29.1592	26.4943	62.6707	23.7091
NUSAP1	85.9434	74.9533	62.5349	64.1138	153.602	100.413
NUTF2	19.5654	18.5345	29.6247	23.9018	41.7567	96.5133
NUTM2A-AS1	1.41331	3.87069	5.23929	3.32746	20.8915	11.6583
NUTM2B-AS1	2.31035	8.32374	6.63793	5.69226	9.06233	13.2035
NXF1	1.05452	11.426	13.1255	10.7066	76.6795	91.0579
NXN	0.810521	2.51419	3.28397	1.98033	7.91646	4.57348
NXT1	4.79848	48.8242	41.9444	40.3968	147.558	85.3598
NXT2	22.6783	15.0968	17.9423	15.0234	32.5833	17.3511
OARD1	54.8678	87.316	94.4574	94.3446	181.029	46.053
OAZ1	137.785	230.496	292.571	251.536	736.414	1586.03
OAZ2	0.666903	0.115128	1.12163	0.366904	27.7325	22.6301
OAZ3	9.0921e-111	0.167883	0.28354	0.102544	8.76939	1.56205
ODF2	1.61004	10.7206	11.6323	10.4343	12.0368	8.87669
OGFOD2	0.265068	1.31938	1.23372	1.00855	15.7108	12.8657
OIP5	57.5744	40.5722	38.1704	39.591	132.695	105.207
OIP5-AS1	3.67518	10.4772	10.6983	9.52135	18.2751	49.6936
OMA1	9.37209	3.15474	2.98352	1.8355	9.99333	12.9287
OPTN	1.5574	2.19613	4.69707	2.07858	22.9837	4.11158
ORAI1	1.47919	55.0772	52.0816	42.1189	11.1784	70.997
ORC3	11.6545	13.5014	14.0127	12.548	24.1006	15.5165
ORC4	13.5877	9.37251	8.52953	8.75646	32.8024	13.9295
ORMDL2	18.9331	22.3093	21.6456	22.1412	166.206	20.9303
ORMDL3	2.2077	7.46863	8.57739	8.61919	11.395	1.69234
OSCP1	4.68448	12.7515	14.2571	12.047	10.3435	1.98784
OSER1	2.84828	51.5861	52.6398	49.0848	337.618	54.4522
OSER1-AS1	0.454175	5.84013	4.87389	2.87793	12.2308	1.43381
OSGEP	0.334967	0.113671	0.326984	0.0144739	10.3244	60.2475
OST4	30.2478	214.21	218.18	183.829	911.961	323.306
OSTC	207.356	86.7888	104.678	94.9028	420.625	181.974
OTUB1	17.2179	66.2988	65.1441	59.8841	83.8139	177.682
OTUD6B	2.86666	3.64716	5.97231	4.81709	6.09018	18.6161
OTUD6B-AS1	12.8893	9.97471	10.4355	11.2895	50.2728	12.8087
OVAAL	0.0574295	0	0	0.259559	15.7912	0
OVCA2	2.63502	1.32239	5.5316	0.908961	48.5686	90.8054
OVOL1	0	0	0	0.101675	8.69144	22.6668
OVOL2	0	0	0	0.0451893	46.0688	31.4713
OXA1L	3.99368	15.3259	19.3115	11.6635	23.2542	83.2499
OXLD1	0.812119	0.828941	2.69867	0.36356	16.6738	30.6258
OXSM	4.26115	9.57521	13.3192	12.7266	28.8895	14.827
OXT	54.834	305.272	402.404	442.963	374.665	119.627
PAAF1	0.604545	1.94874	3.53842	2.61383	15.4113	23.0418
PABPC1	69.4517	35.807	52.5884	46.386	106.066	122.705
PAF1	2.42964	10.0521	10.6431	6.41152	5.09138	23.9262
PAFAH1B1	2.5146	4.02849	4.11087	5.22382	13.3343	12.3357
PAFAH1B2	38.5018	56.9144	51.0591	52.3083	78.0519	28.2997
PAFAH1B3	1.23083	12.3029	15.0912	15.2654	31.2313	121.522
PAGE1	0	0	0	0	5.11158	20.6243
PAGE2	0	0	0	0	39.0493	82.9338
PAGE2B	0	0	0.243386	0	110.856	14.5089
PAGE4	0	0.295293	0.529674	0.646874	5.59952	1.57114
PAGE5	0.421797	0.11472	0.214151	0.264635	44.1775	42.0035
PAGR1	3.44128	19.1848	17.7522	17.8184	7.5828	60.4222
PAIP2	21.8905	180.282	233.452	190.515	284.853	267.544
PAM16	100.165	205.553	213.317	238.205	267.233	112.835
PANK2	1.15707	1.65345	2.85641	1.64944	26.2538	16.7522
PANK3	1.37296	11.6762	18.5108	12.1791	5.28949	25.796
PAPOLA	20.5845	19.5235	20.3493	21.7891	182.261	91.0256
PARD6B	4.43769	1.69294	1.73543	2.23192	20.5848	12.2899
PARK7	18.1698	105.98	169.619	184.161	140.498	487.264
PARP11	0.384124	1.53613	1.53689	1.67607	8.89049	0.465772
PARP2	13.1791	27.3226	22.9838	29.3903	42.1208	70.1423
PBDC1	0.61273	0.0894955	2.32949	0.444127	133.798	77.2169
PBX3	7.06012	2.69376	1.70736	2.83855	7.7239	6.35158
PCAT4	0.377101	0.387636	0.658687	0.766613	5.71883	0.577886
PCAT6	1.59731	8.26532	8.00291	7.47754	18.2841	0.851375
PCAT7	1.83461	1.68235	3.69257	3.30083	7.40903	1.32481
PCMT1	66.939	81.7625	81.2208	84.6563	143.618	227.086
PCNP	94.8772	88.5066	104.588	92.0743	253.78	262.343
PCNX2	0.0746622	0.163061	0.260363	0.0742819	10.8158	0.298051
PCSK1N	0	0.307061	1.98057	0.135973	5.10646	5.2756
PCYOX1	1.6214	3.23	3.33156	3.51653	6.07392	4.83284
PDCD10	80.674	97.6549	97.4563	85.7864	345.918	176.2
PDCD2L	2.90676	11.6537	11.306	16.946	111.316	34.6129
PDCL	26.0775	32.2161	25.4304	32.5528	90.03	44.2555
PDCL3	101.787	562.464	532.22	450.575	2029.92	145.428
PDCL3P4	10.8084	107.484	74.1802	75.5847	242.136	24.5981
PDE12	0.14672	0.318729	0.530739	0.161346	6.87814	7.26225
PDE4DIP	0.507343	0.523944	0.938379	0.716831	48.8684	15.712
PDE6D	2.39851	2.54452	7.08884	3.12893	37.9098	25.1107
PDF	5.97134	13.7569	13.5194	15.8829	60.5333	65.2476
PDHA1	3.89094	11.6335	11.5008	11.4987	8.64991	201.473
PDHB	11.8105	12.7733	15.8458	14.7785	50.7721	335.717
PDK3	0.397965	0.357029	0.458449	0.409264	19.5781	10.7495
PDLIM5	3.50301	3.77832	4.21172	3.30213	21.715	3.65236
[truncated: 1,425 more rows]

## Sheet: Porcine ZGA genes
Supplemental Table S4. Gene list of porcine, mouse, and human ZGA genes and their transcriptional levels in oocytes and early embryos
Gene	MII_fpkm	1C_fpkm	2C_fpkm	4C_fpkm	8C_fpkm	Mo_fpkm	Bl_fpkm
44262	16.8071	11.3188	13.1229	15.8895	36.6029	47.7614	78.2486
44441	10.0645	61.7792	55.3896	33.9276	33.5355	48.5609	53.7742
44442	1.3806	25.4596	27.2068	21.6887	13.0088	3.83492	0.0672973
44446	63.8499	56.2612	49.0374	90.1765	400.813	251.522	773.606
44447	2.46434	7.89598	8.47829	6.65431	3.80207	1.20985	3.68241
44450	63.7631	370.879	463.277	441.432	655.721	353.708	2784.07
AAAS	1.30572	30.6384	27.9523	30.2263	15.1835	12.4742	32.6963
AAGAB	5.26065	28.8806	43.763	44.334	50.1493	18.8493	89.4379
AAMP	2.94076	15.1287	20.6992	35.014	106.71	83.161	31.4588
AAR2	0.805747	6.39336	5.5821	16.4269	82.1295	91.7906	41.224
AARS	0.825823	6.94239	7.96483	10.7374	36.0407	44.3007	561.805
AARSD1	2.95166	11.4384	9.47749	8.39524	48.5157	98.7737	144.65
AASS	5.82034	24.0819	26.9052	27.349	8.71764	4.53959	74.9929
AATF	10.5333	50.5846	37.4911	27.0202	51.4146	52.1993	17.7406
ABCB4	4.19958	12.4217	17.0011	22.5519	9.17123	2.9628	0.127566
ABCE1	28.5093	14.6572	12.5573	15.5741	77.5224	78.1725	49.8869
ABCF1	4.47692	43.9891	49.6051	53.903	54.1129	33.5743	12.048
ABCF2	5.16461	48.1126	47.8204	50.0137	80.9927	65.9702	28.1319
ABHD10	4.84091	3.40524	2.65244	2.55003	6.18744	6.15008	11.0147
ABHD11	9.57391	15.2512	19.9842	29.4968	38.7169	68.9	104.06
ABHD13	3.73305	5.77744	1.61283	3.33808	11.9283	12.6569	4.39304
ABHD16A	3.60923	6.55465	4.63451	5.10182	9.3522	8.82575	16.1635
ABHD17C	9.06628	6.12911	5.34407	7.11842	17.6385	22.7672	28.7463
ABHD4	6.70054	82.3544	85.1643	54.8003	11.9229	20.1607	66.251
ABHD5	5.23515	7.66394	6.19469	17.0167	80.1384	67.6673	33.473
ABI1	74.7271	117.464	131.858	254.704	261.629	319.287	156.168
ABL2	2.02383	5.19208	3.91519	4.81838	9.32345	4.78595	19.3522
ABLIM1	2.00229	10.6032	10.7515	12.7726	5.72165	4.66268	2.61151
ABT1	24.963	32.4866	33.6147	88.3674	128.421	103.397	14.4397
ACAA1	0.161134	0.533725	0.480626	0.758778	10.6932	10.6184	93.0984
ACAA2	0.82545	1.73414	1.1014	4.94878	14.6183	20.3863	24.4275
ACAD8	2.89488	12.9074	8.34235	6.01655	4.77997	6.28019	49.1275
ACAD9	0.283503	1.15394	0.798054	0.707853	8.58227	11.9348	37.176
ACADL	1.29123	0.640924	0.81152	1.84661	8.40122	9.41799	55.2824
ACADM	100.065	57.1269	59.8166	56.3769	244.724	268.967	432.064
ACADS	0.290473	5.15247	4.16242	3.65888	9.96975	6.19867	91.1516
ACADVL	0.760598	6.574	6.2454	6.10402	36.5744	67.9802	108.603
ACAT2	2.74127	22.9841	23.1403	30.4643	110.099	136.893	659.886
ACBD3	3.2277	6.01141	6.81978	8.00808	10.7721	7.48282	5.85075
ACBD5	21.1393	29.5793	31.9853	41.9668	42.3058	26.2571	8.67197
ACBD6	1.02961	2.62184	2.47911	4.57947	16.875	13.403	16.5423
ACD	1.40661	3.21969	2.88552	1.67504	6.5963	7.36327	5.41317
ACIN1	3.98234	8.25127	6.09548	9.75179	14.5943	8.74891	19.9149
ACKR2	0.436624	7.66876	4.23549	5.33067	1.64627	2.47615	0.0515142
ACLY	2.80768	7.15028	5.88083	5.39439	16.1902	21.7995	21.8536
ACO2	0.599401	13.296	12.9011	12.9534	20.5761	22.7153	107.536
ACOT9	5.98881	20.558	33.4608	23.5312	19.8944	12.5574	243.95
ACOX1	36.2945	147.052	170.449	197.69	90.4778	124.983	371.579
ACP1	258.703	102.645	87.2972	68.843	247.794	229.824	141.642
ACSS2	2.93734	6.72127	7.02001	9.01205	4.11846	2.37768	0.869356
ACTL6A	84.037	40.3944	37.4349	47.2252	192.014	197.607	45.7538
ACTL8	0.144686	60.4915	55.4111	37.1991	13.2777	12.6951	0.790759
ACTR1A	1.4035	13.3183	18.6777	17.7402	11.4552	6.7367	58.3478
ACTR3	13.412	10.2892	14.6781	20.2028	38.7136	34.3025	171.152
ACTR8	14.1741	25.7958	20.1719	22.6846	33.2896	38.0701	31.296
ACVR2A	7.53356	5.01215	5.38301	7.53506	13.3007	5.08872	6.39285
ADAL	3.56388	3.48497	2.79376	2.81773	11.0285	4.0007	2.61863
ADAMTS1	0	0.00644889	0.0415544	3.46888	6.89648	18.8718	1.85482
ADAR	0.961831	6.4443	7.42652	7.72228	4.58491	2.17101	1.42167
ADAT1	3.83758	10.4676	14.5221	13.4685	11.0822	10.4421	10.9054
ADAT2	0.328198	0.0922881	0.0620496	0.345127	7.19326	4.13622	2.2156
ADAT3	0.0203395	0.0211226	0.118089	2.76976	9.47732	2.50595	2.19836
ADCK2	1.62968	9.7628	12.907	8.53005	17.0124	7.81118	30.436
ADCYAP1R1	1.6939	11.8187	12.4979	9.37779	4.40843	3.53337	0.319913
ADGRG1	1.84907	17.4664	15.222	9.12359	5.91595	4.60563	1.25056
ADH4-2	1.82458	4.03878	3.55742	5.36679	1.75092	1.96558	65.9354
ADIPOR1	10.0845	51.1525	53.6251	74.1384	135.045	85.624	72.1879
ADIPOR2	0.833517	6.78021	5.70256	17.6984	201.165	212.942	110.672
ADK	0.361709	0.82333	1.05059	1.09223	5.95271	7.51664	21.5486
ADM	0.173757	0.583192	1.4363	1.34587	6.825	25.5217	40.7603
ADNP	1.7325	0.824045	0.668513	6.10916	5.35945	8.02777	8.44666
ADNP2	5.17689	10.756	13.3723	10.8268	9.09513	6.77138	4.35256
ADPRHL2	0.186751	0.193331	0.0499879	1.15299	19.4747	25.0678	18.6015
ADPRM	6.84073	9.02509	11.7404	12.734	18.9324	19.5141	11.9774
ADRM1	0.181565	0.873976	1.82933	1.45248	12.8392	13.4675	9.54216
ADSL	1.57208	1.90048	1.11532	0.768787	6.98053	8.3035	37.9083
ADSS	3.12787	2.29466	2.21098	16.7179	43.9823	40.5317	33.0134
AEBP2	0.485898	0.649199	0.574241	8.50077	102.12	45.1895	265.768
AEN	0.191205	0.582744	0.519128	1.42818	9.93078	35.6538	25.3876
AFF1	2.8015	3.01064	3.15902	4.24855	8.02767	3.88446	5.5463
AFF2	1.62443	4.02506	6.67481	7.69495	3.08907	2.23444	0.510886
AFMID	0.743512	19.6219	27.6865	15.4907	30.9204	33.2751	3.01779
AGBL2	1.63009	8.63118	9.60208	12.7894	4.70747	2.76997	1.59724
AGO2	2.3697	3.74333	5.36144	6.06838	5.7883	5.51815	1.27624
AGPAT1	0.139662	7.55391	8.51613	11.991	3.94536	2.38046	0.823188
AGPAT5	12.9877	14.2015	14.2028	15.4895	71.1246	60.5937	212.028
AGTR1	1.47078	0.233156	0.235281	5.2478	3.69382	10.8068	0.354381
AGTRAP	2.49609	6.63239	4.42928	2.93122	5.31853	11.0579	76.2753
AHI1	5.72711	19.8267	26.8112	25.8567	16.2038	15.0895	2.28097
AHSG	6.54008	10.9969	17.3647	16.1508	3.88981	3.50267	0.183637
AICDA	0.145425	0.0125747	0.246361	2.42615	8.00754	3.09327	18.2692
AIDA	4.35717	16.9047	25.274	33.0893	17.2407	4.25809	7.0101
AIFM1	2.32621	8.92182	9.82422	7.59004	3.53858	4.74334	68.8723
AIMP1	31.2194	26.182	35.2208	32.8149	90.8637	131.816	410.994
AIMP2	2.80004	2.52391	1.53917	8.17732	37.6297	72.0734	25.9452
AIP	0.231381	0.450576	0.412238	5.77835	23.5405	37.8212	3.85598
AK2	55.455	227.076	293.044	185.546	162.197	105.601	106.67
AK4	7.51761	8.70909	7.7174	15.3842	115.294	112.577	13.9085
AK6	53.1649	14.3232	10.2914	14.8896	206.604	238.352	100.642
AKAP1	0.330918	1.99114	3.5971	4.96119	5.82229	3.37052	0.901362
AKAP17B	11.948	33.0341	35.3089	28.9182	13.6182	11.8228	1.96863
AKAP8	4.07536	18.198	17.1606	39.4173	112.169	112.242	53.4122
AKR1A1	4.00009	6.53135	8.75884	8.72238	4.54025	5.68673	13.8595
AKR1B1	55.4649	203.714	240.694	170.947	63.7674	49.8563	176.717
AKT2	0.197357	2.03592	2.461	5.08041	8.00708	3.31884	2.65623
AKT3	32.4623	58.1439	74.7732	72.7703	46.6607	14.2289	2.68297
ALAD	0.346944	2.6112	2.72058	1.90455	8.98363	12.214	101.574
ALDH18A1	25.4319	44.7881	45.1318	55.6477	19.7529	14.1559	12.7034
ALDH2	0.332849	2.81723	3.28048	17.8319	69.617	76.7726	118.267
ALDH6A1	0.230784	1.67604	2.17379	5.19637	5.45558	2.66877	28.0061
ALDH7A1	13.5426	31.5027	41.5678	49.1686	15.9906	5.94487	33.8303
ALDOA	0.0156399	2.12693	8.47512	16.497	44.2052	209.244	584.554
ALDOC	2.85085	48.0972	45.3532	54.2515	42.8772	58.6496	2.29226
ALG10	11.886	26.6403	23.3802	24.9605	12.79	14.2744	29.1088
ALG11	1.81884	7.59246	10.5472	24.978	38.3193	20.3419	15.3516
ALG2	4.53536	1.96668	1.17637	0.725759	5.73107	7.6366	8.05375
ALG3	1.85503	8.22608	9.58434	10.1077	15.833	13.8666	61.725
ALG8	91.0465	298.738	394.397	485.362	159.585	80.0158	34.1591
ALG9	2.05016	3.42258	4.51668	5.4304	2.06535	2.78894	23.1409
ALKBH1	1.78149	4.72165	4.98188	12.9675	44.0691	55.639	22.007
ALKBH5	3.86489	25.9253	31.0956	31.2644	47.598	35.7076	13.7949
ALKBH7	0.53864	3.34298	9.86899	44.7023	85.9596	27.8809	125.001
ALKBH8	2.00121	4.614	4.45541	4.7001	11.43	11.0593	25.6041
ALYREF	2.61242	3.01678	5.9768	20.4726	24.0472	39.1335	16.0782
AMBRA1	1.29264	6.18163	5.78712	5.56722	3.35344	2.88192	1.69552
AMMECR1L	5.86717	10.1116	9.14005	12.9448	19.4325	22.5856	13.0898
AMN1	7.66665	26.1437	30.6065	22.1395	11.4922	8.03913	33.6493
AMT	0.0396475	0.0126881	0.0864842	0.902449	16.6383	21.09	575.173
AMZ2	6.48301	24.8997	40.6374	46.2677	48.375	23.1992	108.354
ANAPC10	124.896	24.4383	22.196	13.9794	96.545	91.0308	64.9526
ANAPC16	40.4256	19.9426	11.8683	14.5314	28.3647	39.2309	38.8307
ANAPC5	1.96982	5.51456	3.58161	2.91171	5.06839	3.64303	13.3051
ANGPT1	3.55201	2.605	2.54402	3.6309	6.34473	4.82563	2.63091
ANGPT2	0.0648502	0.322246	0.570863	7.70976	5.87503	2.41278	2.69517
ANKEF1	3.33849	7.83926	8.25672	9.12109	2.54634	1.67011	0.343125
ANKMY2	38.6784	52.5308	56.8052	66.6898	102.883	91.9211	48.6717
ANKRD31	5.67082	3.94568	3.27951	4.6327	8.70767	4.31806	0.249061
ANKRD33B	1.00279	1.46248	2.37703	3.33347	6.01914	9.2913	0.721238
ANKRD40	4.83547	7.93908	10.9712	12.6086	6.70416	4.10331	10.6246
ANKRD46	6.69161	26.0547	33.642	47.0839	95.2708	49.8955	34.8546
ANKRD49	20.31	14.8895	12.6055	29.3488	30.7284	23.5942	12.3277
ANKRD6	5.01156	10.6973	10.2508	10.656	5.7542	3.79432	2.70932
ANO10	3.17177	9.9109	9.78118	11.4	6.7285	7.38848	33.6648
ANP32B	123.616	410.914	424.319	253.396	486.638	453.838	382.301
ANP32E	2.73059	1.32579	1.60295	1.88333	42.0597	23.9908	132.368
ANXA1	0.019334	0	2.8004	11.6719	12.3696	24.4085	590.862
ANXA5	7.23456	37.8836	42.2718	40.7325	21.7703	14.9665	112.494
AP1M1	0.47073	5.49387	5.12356	4.95806	6.11263	3.9464	2.59954
AP1M2	0.246673	2.08422	2.0261	1.86301	10.3569	9.42985	68.14
AP1S1	0.442018	20.4345	35.3075	54.2938	37.0699	22.7995	49.2827
AP1S2	42.8024	8.64941	7.5275	11.958	19.6477	18.4934	71.6338
AP2B1	4.47735	10.9906	11.954	20.8328	46.5714	41.6103	208.032
AP2M1	40.3687	586.465	780.369	1006.93	371.547	275.967	2327.17
AP2S1	3.27574	17.7236	21.051	21.1733	72.1987	56.2492	76.2541
AP3S2	0.567227	5.1868	5.66683	5.11424	40.7839	23.6544	74.0801
AP5M1	11.6872	18.0758	20.2011	23.3803	18.858	17.9814	16.4118
AP5S1	0.136376	1.47147	2.90033	2.1965	5.29833	2.29285	8.40392
APBA1	4.67089	13.2252	11.5119	9.69036	2.89729	1.59418	0.0658721
APEX1	44.9228	15.971	18.6364	30.9957	230.835	267.415	199.045
API5	17.4573	17.4923	16.9653	44.4006	73.6969	123.493	44.5515
APOF	0.328913	2.3219	4.67799	3.06299	8.57401	8.02218	18.7548
APOOL	5.46224	3.81401	4.40049	4.94337	13.3007	22.8263	191.19
APOPT1	4.87437	0.29632	0.142586	0.247008	16.3444	22.3311	29.97
APPL1	9.36925	7.45923	6.66527	11.2142	14.1305	8.32326	3.43612
APRT	0	0.031429	0.29735	0.464979	6.69019	11.9045	47.9786
AQP6	0.420668	6.40558	7.43622	5.46808	3.35742	1.49374	0
ARF1	69.3091	179.724	253.298	333.247	309.51	246.056	466.43
ARF2	0.27287	0.22722	0.29705	2.12194	5.45806	5.21209	6.94791
ARF3	16.1763	45.1437	46.5503	57.7985	24.2438	14.1982	14.5026
ARF4	250.367	720.306	879.973	625.946	764.491	586.207	836.559
ARF6	4.55395	17.6497	23.5199	22.6285	31.2847	44.4969	77.925
ARFGAP2	1.45019	12.3691	9.19223	11.6752	20.3195	21.6101	27.5373
ARFIP2	0.0355474	0.0649671	0.432919	0.444083	6.25832	8.23178	17.7977
ARG1	0	0.0436683	0.0211569	0.260027	12.4911	62.3813	850.792
ARG2	0.700705	2.07586	3.62654	21.9612	21.3954	10.8865	23.9533
ARGFX	0	0.104381	0.799423	24.072	250.696	110.459	14.4401
ARGLU1	9.28798	26.298	31.4654	45.1344	152.022	143.606	63.0504
ARHGAP1	11.1599	42.267	39.4764	54.8196	37.3182	25.7653	37.5526
ARHGAP5	10.6288	4.04596	3.14318	6.08814	9.94384	9.7039	6.28007
ARHGAP9	0.689777	11.7735	9.90684	9.00162	5.46689	1.2942	1.16433
ARHGEF11	0.118306	4.33175	6.56518	7.72219	5.69317	0.760364	2.12851
ARHGEF26	3.31657	8.16869	9.5686	8.85037	5.93453	2.35959	1.95946
ARHGEF39	2.83383	18.7978	14.2052	9.66477	6.46836	6.82984	7.02791
ARID3B	1.47056	10.3109	8.15855	6.72574	4.47293	5.19707	5.36094
ARID4A	111.926	227.661	284.106	258.441	118.152	77.9536	9.62469
ARIH2	2.98042	8.9812	12.4336	8.83071	17.8822	15.1551	12.4035
ARL13B	6.89581	35.3671	40.2755	28.3661	19.1372	8.90153	6.42819
ARL14EP	62.4744	19.4377	21.5667	32.5944	56.3729	32.1321	49.5436
ARL14EPL	307.247	1696.29	2115.78	1374.41	593.607	508.474	30.8697
ARL2	0.347388	11.3993	10.0906	7.5232	45.0432	21.1749	83.5467
ARL4A	346.214	217.986	209.851	326.123	722.966	522.482	80.1812
ARL5B	27.0105	4.472	3.16251	8.48261	16.7718	16.0227	3.09439
ARL6	3.45455	6.97743	11.0953	54.9261	136.896	22.9906	11.2114
ARL6IP4	0.779363	10.4236	9.2172	5.97034	6.71688	4.57384	8.81315
ARL6IP6	24.2336	61.9435	71.9592	59.7276	78.1907	45.4914	61.1683
ARMC1	310.466	1037.59	1109.34	964.197	933.422	733.427	476.505
ARMC7	0.141043	1.9314	1.38155	3.91355	6.3799	9.90129	3.14362
ARPC1A	6.47076	38.0272	52.7646	50.1127	87.0213	93.5764	328.153
ARPC1B	0.784956	50.7221	71.2342	46.8231	20.2132	20.3187	144.173
ARPC2	52.1559	75.4032	101.64	66.9705	134.178	251.813	789.239
ARPC3	3.78444	24.0762	36.5533	108.792	582.523	436.08	1276.27
ARPC4	3.49268	22.2341	32.0666	28.4263	42.6717	22.7533	135.189
ARPC5	8.78396	18.7242	23.3956	21.6616	29.0479	20.8159	195.544
ARPC5L	20.1811	2.7032	2.77014	5.61014	14.8713	16.6552	10.0037
ARPP19	9.91249	58.5795	46.6218	73.4611	159.042	127.758	288.912
ARRDC2	0.265529	0.52317	2.41138	16.9824	18.2452	22.8722	4.01654
ARSJ	3.37752	16.9205	18.1471	23.0282	15.5203	6.38064	10.3906
ASB11	29.4509	111.065	195.057	228.552	102.24	57.2943	14.0089
ASB3	22.5297	22.3739	21.9711	21.1345	52.8338	38.7291	20.4267
ASB6	0.599972	2.42816	1.59815	2.20302	5.13784	5.79688	3.26465
ASB8	2.61507	13.5436	18.803	38.5402	41.667	21.817	12.0651
ASCC3	7.42029	10.7549	13.6663	11.8938	18.8486	8.78976	11.8323
ASH1L	2.89762	2.68687	2.58896	3.94209	5.5674	4.28029	2.29739
ASH2L	33.0225	180.608	193.147	185.069	81.6362	36.942	14.4857
ASIP	1.52894	1.81109	11.1191	5.49361	1.05794	1.91434	0.900193
ASL	0.0138612	0	0	0.38542	5.92953	7.77051	43.0142
ASNA1	0.0314888	0.230615	0.732931	18.8081	37.6196	26.8338	51.9891
ASNSD1	2.93657	3.78957	3.72441	20.7315	137.456	110.287	55.7891
ASPA	2.03392	4.72892	5.81092	5.57434	3.71248	1.45855	0.52934
ASPHD2	3.94431	32.0562	25.5597	25.0731	18.0123	7.72923	0.352035
ASPRV1	1.45019	21.6646	31.4662	22.6062	16.7102	7.81174	13.4041
ASRGL1	0.955102	2.50717	2.94146	3.56891	5.71025	10.3819	71.7342
ASTL	3.7952	21.3566	27.2357	25.5654	11.2592	14.079	0.521879
ASTN1	14.3021	116.846	155.35	164.173	80.672	22.6623	1.13667
ASZ1	3.95965	2.13833	2.31506	2.06184	24.5214	27.5364	59.3244
ATAD1	8.391	11.0647	16.7412	29.9541	88.9591	53.1272	41.3124
ATAD2B	1.81835	1.47982	1.70735	5.98439	11.0618	12.5019	2.11858
ATF1	6.138	2.72438	3.21393	25.6179	62.3054	83.5512	22.3048
ATF3	0.0118221	0.0153363	0.362643	0.751223	14.1984	59.6023	35.3223
ATF4	21.4886	63.7593	39.1327	63.9223	118.79	305.164	353.254
ATF7	11.9667	34.0095	30.4856	29.423	19.1543	7.47544	2.95876
ATF7IP2	8.76692	1.81533	3.00129	3.34177	6.29593	8.88156	5.38072
ATG101	4.03299	7.92443	6.95225	25.4994	95.1523	138.471	30.0752
ATG13	3.59829	13.9809	10.2974	8.61238	7.17174	7.32276	20.307
ATG3	4.74978	6.59504	4.79006	4.65816	45.6075	77.6708	48.1509
ATG4A	227.307	402.597	506.973	575.614	236.666	77.9749	32.4916
ATG4B	1.43811	3.51453	6.35946	4.22031	52.5134	48.8223	14.231
ATG7	5.50823	11.7011	13.1238	13.0058	20.425	15.8331	15.4483
ATIC	51.4811	25.9231	15.4752	15.6342	40.1479	69.0508	434.995
ATMIN	2.49097	2.65013	2.88445	5.08922	5.91296	7.90902	5.0129
ATP1B3	37.0858	24.445	19.2854	83.0728	651.458	281.654	645.267
ATP5A1	47.828	42.016	53.5527	73.887	196.577	291.654	1380.7
ATP5B	14.0853	7.98193	4.56371	11.7805	50.4878	66.352	265.201
ATP5C1	253.159	151.441	102.057	118.371	374.362	504.414	724.179
ATP5D	0.239928	2.01824	1.45622	2.0543	24.3369	30.2205	70.9038
ATP5E	30.9296	30.5045	16.6959	29.3258	113.278	142.466	622.437
ATP5F1	51.0549	15.6195	6.52605	7.91822	57.9831	48.7642	222.594
ATP5G1	9.81772	7.89121	4.86375	10.3019	70.41	92.1568	994.769
ATP5G2	55.8891	122.567	150.06	170.573	130.947	103.454	477.565
ATP5H	4.15657	5.52616	2.22237	62.9725	804.42	752.952	1804.2
ATP5I	167.305	127.404	78.1668	89.7991	182.547	174.702	638.586
ATP5J	74.5937	11.0429	14.9332	19.9798	163.382	149.707	463.321
ATP5J2	217.04	24.4017	9.25567	4.61054	24.0425	101.641	28.6693
ATP5O	118.935	8.46795	2.12154	1.88664	11.0151	35.5885	118.378
ATP5SL	0.450987	7.56652	9.49912	13.3963	55.0801	60.8907	138.756
ATP6V0A1	6.26371	26.2912	24.9789	28.9597	9.97202	5.60103	10.207
ATP6V0A4	4.21518	37.7325	31.5607	24.1236	8.82978	14.1938	184.61
ATP6V0B	80.213	546.201	908.44	1040.15	591.197	519.12	2967.38
ATP6V0C	10.8043	80.4006	105.347	64.3967	144.724	246.294	1232.47
ATP6V0D1	10.2797	81.8407	124.749	118.54	44.2714	28.2746	341.176
ATP6V0E1	355.779	184.964	167.464	231.961	399.952	394.889	555.618
ATP6V1A	2.47073	3.71199	4.14467	7.7949	21.1093	14.8288	18.3242
ATP6V1B2	15.328	59.3065	81.8475	147.629	167.816	151.69	279.702
ATP6V1C2	22.4585	16.1334	10.3954	9.11608	63.2469	66.6985	149.488
ATP6V1D	81.2455	174.505	235.277	207.6	260.378	202.622	396.876
ATP6V1E1	9.90079	9.08486	11.3545	34.3587	100.952	119.633	241.006
ATP6V1F	7.38196	7.32308	6.05907	8.45908	38.0546	37.5753	181.601
ATPAF2	0.410891	0.372789	0.319602	1.85463	14.5756	16.6132	8.0834
ATPIF1	72.0952	9.34029	4.74132	5.25223	51.6779	62.3961	950.799
ATRAID	14.7244	17.6107	17.473	13.1852	32.5062	40.7996	251.743
ATXN1L	5.57437	14.8812	16.6603	19.0814	10.0775	7.4398	5.36518
ATXN3	9.55132	20.3692	25.8232	40.2941	57.4571	24.4141	99.6869
AUNIP	4.73479	13.1906	14.7856	22.1517	27.2044	16.7576	1.58342
AUP1	0.441539	6.37891	7.29973	7.67585	14.5339	18.9231	54.9009
AURKA	530.617	1638.78	1844.34	1770.36	1136.87	893.734	182.062
AURKAIP1	6.15784	5.9397	2.76808	3.49917	9.14168	6.29598	7.52501
AURKB	51.4136	406.728	296.803	220.853	173.101	265.467	65.8481
AVEN	25.9852	76.5675	128.534	98.1203	78.0501	50.1412	1.80423
AVIL	0.626367	1.31705	1.47643	1.62128	23.0304	23.4339	20.9471
AVPI1	0.840925	1.67767	1.17467	6.1082	14.6195	23.663	35.956
AZIN1	50.3407	119.539	104.738	145.542	150.334	145.661	281.947
AZIN2	38.4228	127.077	148.647	124.977	41.5318	20.2472	0.960645
B3GNT2	12.6037	2.66055	2.8103	13.4583	28.0534	40.5548	48.1218
B3GNT3	0.359629	9.30908	8.07181	7.29609	3.95384	2.26144	54.6527
B3GNT4	187.435	1241.63	1275.03	1670.89	828.789	698.062	9.12326
B4GAT1	0.189788	4.72238	3.43552	1.62102	5.00949	12.1225	7.64134
B9D2	0	0.0645013	0.538062	2.34339	9.94116	36.4519	31.4962
BACH1	5.27621	4.38792	2.88809	2.61599	6.85235	4.23375	17.6301
BAD	0.0223696	0.313046	0.121481	7.19302	81.728	166.951	44.493
BAG1	15.5268	25.6842	28.6693	32.4922	31.7231	45.2615	30.9372
BAG4	3.2902	14.1824	16.8136	11.8556	8.41037	3.21483	5.33755
BAK1	0	0.0407276	0.0245623	1.09436	5.80376	6.55504	5.85484
BANK1	4.56663	10.6519	11.2094	15.4981	8.10937	2.75336	0.463474
BAP1	2.07773	14.3503	17.6358	21.5353	22.5728	26.7755	19.9902
BASP1	6.88515	11.242	10.5438	11.4153	89.9131	68.4982	72.0758
BAZ2A	2.18228	8.24862	8.21767	14.7666	16.9279	12.8764	8.25426
BBS2	27.1744	65.7749	73.9338	72.1622	21.3723	34.1085	1.43382
BBS4	2.92301	8.37997	8.64206	9.17784	4.40292	7.09813	8.07999
BBX	5.12741	12.0881	17.5314	16.4613	10.6963	10.6706	37.5083
BCAP31	6.87224	11.0535	5.86372	12.019	44.2593	50.1843	72.1037
BCAS1	5.66689	18.1781	22.6605	19.1094	13.7274	7.40772	0.515153
BCAS2	55.8582	38.2573	79.1723	488.637	908.329	791.73	376.958
BCAS3	1.69196	0.846234	0.364307	1.52157	5.78572	4.87291	2.65906
BCCIP	36.3602	111.016	132.851	107.774	239.876	225.067	509.795
BCDIN3D	0.28306	6.29154	5.79869	24.293	70.7794	29.6591	42.7375
BCKDHA	0.252357	2.43084	1.27854	2.39119	16.4031	28.2379	15.3323
BCKDK	8.95279	27.3318	33.4382	36.9138	63.8949	88.806	24.0049
BCL2L1	27.6598	448.457	530.272	504.086	334.963	108.486	50.8612
BCL2L14	18.5933	228.302	263.492	301.072	80.9982	36.8188	5.62418
BCL2L15	0.207577	0.194661	0.167863	4.85544	9.37515	2.64582	0.935454
BCL7A	0.725665	4.78047	6.87134	7.01766	5.07425	1.81473	4.05257
BCL7B	9.53723	48.1782	57.2637	50.159	53.1885	80.6355	28.9906
BCL9	1.03083	6.78497	7.94249	7.04648	3.42733	3.90707	2.75802
BCLAF1	6.5325	1.96088	3.51822	27.9684	44.0209	41.6379	37.0286
BDH1	1.48748	4.18911	2.57782	1.65251	13.1195	8.6417	38.0822
BDNF	6.21676	4.0489	3.70472	16.8455	5.21079	6.16303	1.46766
BDP1	2.23208	2.86147	2.8448	5.76294	17.3439	14.9517	10.7945
BECN1	24.6205	46.8555	53.2643	59.9372	26.7877	17.6863	21.555
BECN2	0	0.192703	19.263	169.821	345.39	153.435	5.34713
BET1	153.355	26.3285	5.94977	5.58424	31.5538	39.5103	18.0906
BET1L	5.95674	38.4751	28.5837	22.578	30.1004	26.556	32.6985
BEX1	4.37128	2.10101	2.88962	2.2794	12.9481	9.05733	23.944
BEX4	1.54007	0.595644	0.884809	0.752327	5.04063	7.93224	896.391
BHLHE22	0.041075	0.0464932	2.16204	32.8395	23.1687	3.41209	0.212365
BID	0.0760291	1.38544	1.63207	105.417	599.264	450.456	491.76
BIN1	0.0388977	0.12641	0.030774	0.193749	8.37388	5.21133	11.3019
BIRC5	17.2335	164.166	205.9	230.884	298.524	168.865	287.983
BLCAP	19.6819	123.542	135.87	115.063	93.1475	83.6546	140.131
BLMH	13.2264	35.1029	38.995	33.5685	19.3809	23.2689	39.2362
BLOC1S1	2.3499	4.23954	1.6106	5.36729	0.946214	2.15608	5.97936
BLOC1S2	9.15698	4.70851	6.08358	44.2893	321.934	152.568	145.017
BLOC1S6	4.71014	2.66827	3.46934	4.28361	11.4565	6.73546	4.8266
BLVRB	0	0.0490412	0.0931429	1.71009	57.5667	57.5686	325.006
BMP15	574.31	5452.33	4145.58	5668.96	1727.21	3077.82	20.0442
BMP4	10.0962	42.8197	82.7363	384.938	262.373	427.602	12.8597
BMS1	6.28887	15.9656	14.1718	14.6858	50.76	41.671	21.6466
BNIP1	17.5396	10.9229	7.86465	19.7382	44.2828	46.5212	21.3178
BNIP2	4.43895	2.20106	2.30665	13.856	44.2259	33.1514	5.90037
BNIP3	0.437065	0.783206	0.659188	0.955851	5.04467	5.32204	20.2173
BOLA1	0.561764	1.44559	3.83526	5.32627	33.9905	34.44	243.474
BOLA2B	1.0532	0.548717	0.407282	1.52245	5.48015	3.72429	28.2673
BOLA3	1.20901	3.12499	4.24134	12.836	35.7108	22.4135	473.4
BOLL	2.2074	3.93403	6.87736	7.1926	1.90795	2.2976	0.654145
BORA	38.8854	150.625	189.764	146.777	80.5176	108.2	82.7644
BORCS8	0.125452	7.21467	8.34751	4.1713	6.27866	3.04288	61.8818
BPGM	5.33593	2.4546	3.20479	6.93335	3.94973	3.4284	7.7753
BPHL	3.3273	38.6546	42.3461	29.3733	12.5236	7.26311	20.1243
BPIFA3	0	0	0	0.965783	9.22179	6.09204	0
BPIFB3	0.147079	0.720468	1.00614	2.89467	6.77011	5.35782	0.333937
BPNT1	19.7116	24.0472	40.233	40.6755	24.7717	17.7377	34.3726
BPTF	4.05375	5.21971	5.46772	8.8789	9.66206	9.22222	3.26422
BRD2	0.94209	12.1301	13.6956	32.3861	18.9333	33.1087	11.6481
BRD4	9.10797	42.9882	36.9643	27.4491	27.0501	18.1445	22.0049
BRD8	3.27951	4.48138	3.82968	7.67203	13.0958	17.1604	9.28975
BRD9	1.13564	2.15065	2.64856	2.42688	8.13641	12.7801	2.07263
BRDT	26.0903	96.4622	108.41	202.761	452.727	380.056	129.873
BRF2	1.34685	1.78799	0.831981	2.50428	7.06215	4.59233	2.21799
BRINP3	5.25549	10.9138	11.4202	10.9407	5.9076	3.00825	0.362773
BRIX1	335.503	288.868	259.045	439.963	1245.22	1092.46	375.416
BRMS1	0.0919076	1.36587	0.747043	1.29378	12.5387	10.7295	7.48367
BRMS1L	6.17374	3.59615	3.42879	3.61841	9.54365	8.46412	8.2941
BRPF3	0.501151	1.74164	2.2338	4.47863	12.2175	17.6581	5.97052
BSDC1	0.494472	3.17137	4.45277	5.95633	4.47014	3.67796	11.7989
BSG	2.44953	11.3008	11.4045	17.6455	30.7522	40.7761	80.7162
BTBD11	1.5564	8.21474	11.2394	11.3063	5.6014	3.01684	0.143273
BTBD18	3.03312	35.6361	36.2108	38.6805	13.5832	18.3837	0.907423
BTBD9	9.7648	30.2289	35.7397	46.1061	27.0697	10.8928	3.20991
BTF3	1947.01	6143.37	8169.12	6429.91	4202.27	3978.9	3569.2
BTF3L4	2.19135	6.05743	14.6777	22.2759	56.6808	44.7543	115.69
BTG2	0.401563	0.621798	0.825476	14.5723	28.4278	25.4529	52.2129
BTG3	1.95203	0.341382	1.23304	22.8327	94.1657	127.262	46.1977
BTRC	5.23695	19.8935	22.4275	18.8113	24.0717	11.5317	94.3782
BUB3	92.3787	421.894	310.113	319.613	389.058	333.283	899.912
BUD13	33.7327	149.296	181.137	94.7618	48.0486	59.7558	33.6877
BUD23	3.14245	4.83809	4.32805	47.1655	255.385	371.975	117.844
BUD31	106.814	80.6377	39.6569	60.3937	190.619	245.685	99.0641
BYSL	2.42885	4.93613	4.33654	6.36342	24.1804	28.7123	8.89406
BZW1	50.3055	73.5446	95.5281	304.231	610.44	560.533	612.219
BZW2	28.3114	50.5159	70.3449	161.982	336.812	275.963	625.521
C10H9orf3	6.69717	35.018	39.4268	28.2292	13.0393	20.1558	19.8887
C12H17orf53	1.24462	13.688	9.79617	6.33943	15.0049	17.9628	2.79426
C12H17orf62	0.0850934	0.170453	0.135439	0.343289	5.38681	4.76492	2.10996
C12H17orf80	41.8108	340.133	371.303	262.069	141.085	129.689	70.8432
C13H21orf2	0.0406088	0.371812	0.619168	0.351859	11.4427	11.3394	8.31574
C13H21orf59	6.45018	19.124	24.8097	12.5296	20.9515	20.2224	81.8896
C13H3orf14	0.623252	0.0548075	0.200444	3.2309	18.9465	13.1932	7.27557
C13H3orf56	1.65469	17.516	30.9199	107.303	128.458	117.674	6.59806
C14H10orf76	2.21273	11.5629	12.7076	10.8074	6.83209	5.5225	9.0056
C14H12orf43	1.6062	2.89412	2.85558	1.75516	5.69887	6.05705	4.53025
C14H1orf131	1.52915	0.936484	0.624329	1.38794	18.3984	9.98283	16.6242
C16H5orf51	1.80677	3.25319	3.77825	6.97904	11.0865	5.10898	36.3803
C17H20orf27	3.69145	22.5772	26.8878	16.4014	39.3629	44.8686	38.5963
C17H8orf48	1.72665	10.7087	14.8741	11.3049	4.09279	1.02171	0.868745
C18H7orf25	4.14565	13.5131	15.7525	22.671	31.7986	22.8396	6.54973
C1D	45.7438	35.2718	52.8374	159.014	491.777	468.206	122.757
C1GALT1	0.231186	0.193171	0.213375	4.23039	16.8138	12.0649	15.3063
C1H14orf37	17.4321	34.1381	37.6783	43.0711	22.513	21.143	1.99661
C1H15orf57	2.53997	5.34976	6.23891	7.96875	12.44	5.33429	18.1232
C1H6orf120	10.3614	13.2721	16.7421	21.7143	15.3164	16.1276	31.0304
C1H6orf163	0.0945274	0.191003	0.228894	1.92883	5.71917	2.77644	0.519671
C1H6orf203	20.7033	22.5814	9.59226	14.2073	161.39	181.863	583.138
C1H9orf78	20.3528	29.0201	33.5565	67.6468	182.346	177.033	62.5059
C1QBP	36.1232	15.1344	12.7833	33.9004	127.392	125.66	66.9472
C1QTNF2	0.0226075	0.0394839	0	0.742652	7.98568	2.88707	2.9863
C2	5.28287	51.8722	58.6981	22.8068	11.8052	15.8928	1.531
C2H11orf58	265.857	163.875	172.931	362.588	804.927	724.271	935.17
C2H11orf98	21.9515	46.2758	33.8836	27.8994	221.329	234.877	129.927
C2H19orf25	0.01312	0.334199	1.82828	11.8363	38.2851	59.5955	9.10185
C2H19orf53	3.06185	4.89653	3.65785	24.1377	103.682	108.168	31.6013
C2H19orf60	3.25369	1.21136	1.30475	0.890631	6.77676	8.01953	24.2934
C2H5orf30	0.0265598	0.0233298	0.280964	5.29164	3.68294	2.30759	0.785878
C3H16orf59	0	0.395695	0.0465565	0.43037	6.56328	5.30853	1.60264
C3H16orf91	0.0166864	0.0505007	0.220713	8.28273	43.2062	37.6727	38.5545
C3H2orf49	1.70253	1.56604	1.59996	2.10506	7.71511	4.8042	2.72374
C3H7orf50	0	0.15365	0.0861743	0.325506	11.9014	8.22845	7.70456
C4H1orf112	2.8477	8.32356	11.3856	13.8152	11.5718	7.95709	7.29288
C4H1orf52	6.6702	5.40561	7.52367	27.3111	128.545	171.198	53.4032
C4H1orf56	5.33273	22.5796	21.5779	22.5457	9.25611	8.37672	4.40495
C4H8orf33	1.63092	2.80324	1.43816	3.64134	24.4686	21.9644	33.4502
C4H8orf46	5.38215	7.57289	4.62606	3.78651	12.1202	11.2238	0.0862997
C4H8orf59	21.5491	5.65753	3.23929	7.97975	64.0895	74.0655	106.334
C4H8orf76	35.3108	48.5076	55.3721	61.4383	218.638	119.354	152.471
C4H8orf88	0.534653	0.226341	0.080567	1.35873	5.43315	2.23348	1.53873
C5AR1	2.07473	12.5521	16.8121	21.6593	13.2361	6.1846	0.457451
C5H12orf10	0.0411098	0.0550132	0.0862455	0.797458	11.9467	1.08654	28.6463
C5H12orf29	2.48537	1.58631	3.08774	4.43482	54.2491	40.7122	81.1948
C5H12orf4	8.72752	40.5984	50.1243	79.7609	60.2962	23.1225	31.105
C5H12orf45	8.85056	5.89891	8.23491	22.6048	49.8687	63.2855	34.2576
C5H12orf57	0	0.406677	0.408412	11.6225	18.5099	95.3487	20.8729
C5H12orf66	2.09259	13.1079	17.7423	15.6219	10.1556	3.74875	3.05213
C5H12orf75	0.608539	2.88694	2.35918	8.20169	16.3203	20.7146	3.93029
C6H16orf70	5.64921	41.8798	43.1516	40.3815	84.4711	86.8932	30.4306
C6H18orf21	0.398569	0.166096	0.140503	6.39401	48.469	33.8883	64.8262
C6H19orf12	0.892532	15.4763	21.549	10.2327	4.11608	1.92056	20.8214
C6H19orf47	0.104203	4.9402	5.42048	5.61544	5.24491	4.56934	0.489267
C6H19orf54	1.68075	17.2514	15.236	11.8816	7.62872	4.9544	4.2515
C6H1orf109	0.253347	0.875742	1.49052	16.8196	31.7102	29.494	13.3671
C6H1orf123	3.16707	8.2174	7.37058	6.69481	37.3364	27.0197	86.0411
C6H1orf168	31.5015	261.956	336.984	324.366	103.053	63.64	3.63307
C6H1orf174	3.58474	15.4446	16.4674	9.23887	10.9738	12.4003	10.9446
C7H14orf1	47.4859	56.9225	99.7848	106.146	75.9644	52.9655	76.7565
C7H14orf53	0	0	0	0	18.1954	0	226.109
C7H15orf39	0.0884871	2.40257	2.13113	3.2385	5.67069	6.66084	3.02698
C7H15orf40	0.473689	0.112929	0.0609235	0.547398	5.41351	4.94779	15.4219
C7H6orf106	3.30879	20.3903	27.6881	26.5712	17.1634	17.3545	16.953
C7H6orf136	13.3545	59.2547	68.0435	55.818	48.697	26.2642	12.55
C7H6orf62	14.2405	6.20173	6.40873	22.6291	40.0985	37.9507	227.23
C7H6orf89	4.05854	8.43524	7.50841	7.55346	16.5049	20.6096	12.2535
C9H11orf1	5.1729	12.5885	14.0199	11.4843	6.04298	5.71146	7.59303
C9H1orf116	0.0118223	0.259668	0.946869	2.83101	5.93274	12.5663	47.5165
C9H1orf21	38.1999	61.8125	73.8608	76.6722	48.6741	30.7171	1.13378
C9H1orf74	0.0600198	0.269769	0.504401	2.63442	9.21631	14.8013	6.40061
CA3	0.0129385	0.0672623	0.0166338	4.52359	80.101	104.475	8.801
CA9	90.1632	266.414	300.142	210.277	107.033	117.076	7.00047
CAAP1	10.8944	14.8655	17.0655	13.5139	27.2476	27.5141	21.2909
CACNA2D2	0.144927	3.49045	4.98929	8.20061	4.97999	2.35328	0.29996
CACTIN	1.19387	1.25041	0.725685	1.29408	6.50873	9.36059	1.95672
CACUL1	1.97741	5.62928	5.74037	5.55786	9.14279	3.39028	7.75581
CACYBP	20.4493	60.7246	56.053	198.865	625.753	496.22	778.268
CALB1	7.44863	15.4034	14.1683	19.0233	8.92993	6.35054	0.153118
CALCOCO2	12.1307	28.8561	34.5574	36.8608	17.9843	25.3711	81.2383
CALM2	1408.47	78.927	110.528	236.686	689.122	482.636	693.198
CALM3	2.34587	6.93858	7.38527	7.31515	19.21	19.5179	32.0712
CALN1	4.26519	52.8138	54.2786	39.2078	20.6381	14.8927	1.28606
CALR	28.9728	11.2467	8.6768	14.183	72.3446	52.3893	202.958
CAMK2G	22.8546	104.436	109.748	78.7507	89.7684	36.2296	7.75553
CAMKMT	3.17497	3.98165	4.16891	7.51337	16.5845	12.2933	8.64145
CAND2	3.46719	8.77468	8.33048	9.41768	2.33633	1.43252	0.21302
CANX	14.212	20.7888	16.4394	11.7483	31.7153	34.9789	95.8947
CAP1	6.44476	21.3607	30.3529	46.5754	85.4397	101.532	1465.26
CAPN1	0.101344	1.34046	1.47828	1.4225	13.4725	14.1725	24.4197
CAPN13	1.32475	6.1107	4.99897	5.39647	1.772	1.0448	0.0154475
CAPNS1	4.61931	21.6384	28.6021	39.7332	34.0754	19.112	35.4221
CAPZA2	1.43135	2.49639	5.25031	16.7341	63.1786	69.4253	540.017
CAPZB	1.09669	3.73804	3.73959	5.32236	3.92765	3.5541	9.1914
CARHSP1	1.0823	8.20135	7.86785	11.2339	16.3722	12.5422	24.9491
CARM1	1.51926	7.44157	8.18532	11.472	5.93282	3.20222	0.69904
CASD1	41.1137	22.9912	23.7634	49.5433	34.1085	6.7847	6.69326
CASP3	85.0375	47.2423	51.2973	88.1369	165.921	82.9632	61.3408
CASP6	37.4614	6.41516	7.95463	7.48331	38.151	28.7064	23.368
CASP7	3.95811	15.638	14.2116	13.3788	12.3184	4.98216	7.89533
CAST	15.7819	31.379	38.2483	43.7992	28.9223	9.34414	18.8628
CASTOR1	60.9235	382.665	529.726	354.635	150.641	106.057	18.8777
CAVIN2	1.59316	7.26774	4.91442	6.72572	5.09942	2.34036	0.757948
CAVIN4	4.0098	18.0224	18.9473	11.5367	4.47971	3.28089	4.85212
CBR3	5.49386	20.51	21.8107	20.706	15.7289	12.3984	0.824213
CBX5	6.07683	9.12592	8.18362	12.9978	25.2715	27.0729	11.7546
CBX6	0.152587	2.30592	1.72784	1.51839	16.593	5.08742	0.870107
CBX8	0.631116	6.48388	7.37828	6.77914	16.1548	12.2499	4.04823
CBY1	19.1242	107.008	166.426	101.102	43.611	23.8869	24.6066
CCAR1	25.0244	75.1627	59.1708	50.394	41.5823	41.2869	30.4138
CCAR2	0.45899	4.38402	4.2066	3.29946	7.1697	10.8091	7.73404
CCDC112	1.82406	10.8286	12.1564	15.0013	10.4107	4.89047	2.88992
CCDC115	27.2078	155.308	198.097	136.531	108.138	117.191	61.9613
CCDC12	1.22041	13.3576	8.38073	5.12001	13.2116	12.9892	13.8648
CCDC124	1.79466	6.58169	5.39579	5.25735	32.7814	48.7523	63.2277
CCDC125	7.69616	29.0241	30.7812	40.6991	25.7309	5.97525	2.95473
CCDC130	4.62814	9.38528	7.11283	7.89549	19.73	16.2339	20.0996
CCDC134	0.279339	0.918958	0.666523	3.20418	17.4423	11.2411	8.24076
CCDC15	57.0147	151.839	170.796	179.388	64.748	47.6781	13.2539
CCDC167	11.658	12.0871	6.51856	11.5486	44.6372	26.5559	48.3177
CCDC174	8.36519	4.76858	4.97578	7.9922	36.168	20.3862	20.5574
CCDC186	51.6519	114.024	140.927	138.733	145.3	72.0681	32.5171
CCDC189	0.0651248	0.384822	0.0846919	1.17585	5.82277	2.99729	0.953422
CCDC191	2.16527	5.9434	4.56461	5.27794	3.37425	3.40971	5.4885
CCDC28A	20.2228	45.441	53.9853	55.0243	131.333	196.583	359.675
CCDC47	11.8542	10.3147	9.68444	16.6699	85.8416	58.5867	107.943
CCDC51	2.49242	5.76805	7.01685	54.2927	212.517	177.11	125.419
CCDC58	19.3468	7.32026	4.94118	10.9893	118.31	204.842	170.043
CCDC59	66.1618	85.7128	63.7302	85.5455	615.526	853.57	481.925
CCDC61	1.26174	3.01911	3.69276	5.59657	1.67116	0.401171	1.44481
CCDC77	9.13447	9.09171	10.2884	13.2343	18.7722	13.7056	15.1614
CCDC84	0.696718	1.61247	2.3295	8.25344	13.7783	13.211	4.226
CCDC86	6.17699	23.1691	15.1745	14.0176	66.7409	107.229	10.8721
CCDC88A	52.8801	141.26	125.585	132.051	98.6148	44.7276	1.99897
CCDC90B	6.19081	8.26623	10.2086	8.78817	13.2548	7.21143	24.3768
CCDC91	6.47192	13.9697	12.109	10.7498	16.0272	16.949	16.298
CCDC93	11.4993	58.8257	62.5734	39.635	25.6135	18.3325	24.4291
CCDC94	1.18621	4.93029	4.63845	7.94665	10.0263	9.75824	8.38257
CCER2	2.92721	9.98575	8.87296	7.52793	6.80423	13.5337	0.881861
CCL22	0.708346	69.4555	104.653	124.815	58.0726	26.6586	4.30718
CCL4	0.678231	27.0693	0	9.42871	0	0	0
CCNC	3.67724	3.46782	5.18757	25.8763	83.0859	65.6393	173.757
CCND2	0	0	1.04778	21.1501	79.3482	124.101	16.4181
CCNDBP1	1.58085	24.98	24.2308	35.9184	100.866	97.2071	183.411
CCNG1	83.9537	177.322	195.998	320.499	131.066	249.423	1215.88
CCNG2	0.226237	0.243371	0.866729	6.48218	2.09596	4.08554	2.87982
CCNH	11.9408	17.1071	18.4759	16.1673	63.16	41.8962	77.2127
CCNI	13.0685	25.5308	27.8603	47.6843	31.8444	17.9696	60.7368
CCNJ	11.4689	15.4592	19.5725	30.6895	23.4265	13.3235	4.75248
CCNL1	6.63991	8.84904	10.8197	22.9635	72.6465	58.0223	62.6511
CCNT1	4.11659	6.08201	7.98877	11.8154	10.6526	13.1261	3.73806
CCNYL1	35.8198	69.2515	91.8619	96.5609	47.2965	41.0753	8.9228
CCPG1	8.52264	20.2021	21.6183	23.6915	58.3926	36.055	35.8603
CCR1	0.346964	3.4649	2.84025	5.0562	1.64808	0.677937	0.363958
CCR5	1.96541	9.88592	9.85212	12.7142	3.96337	2.30222	0
CCT2	119.478	319.417	351.734	338.234	254.129	253.527	461.333
CCT4	3.89202	2.78106	4.30421	7.28404	102.198	132.386	276.161
CCT5	26.7533	149.285	184.052	215.6	321.469	316.839	726.746
CCT6A	18.8158	22.4415	25.6966	42.3092	159.115	171.156	244.155
CCT7	11.0123	50.5759	55.598	50.7647	88.3256	148.025	154.446
CD164	183.704	256.473	264.182	372.166	255.909	227.69	216.108
CD2	2.89254	6.24419	6.688	7.78718	4.31301	2.02197	0.222598
CD200R1	0	0.0126959	0.153911	6.15435	9.11796	7.6434	4.88675
CD247	1.60423	7.84735	9.91652	8.37	5.67617	4.63888	9.58423
CD28	5.26122	4.9098	9.9378	18.1893	7.72929	1.11133	0
CD2BP2	0.995429	12.4152	14.4675	9.75442	24.3364	13.733	22.8745
CD320	0.427816	3.15057	3.69772	7.0371	28.6254	34.2416	36.1655
CD37	0.402951	13.3722	21.0428	40.331	50.5879	42.8967	6.16426
CD3EAP	1.93227	82.0418	105.156	86.4556	149.116	183.771	86.0427
CD40	5.54344	22.319	21.5492	23.3139	9.25008	14.3052	5.54791
CD46	2.02402	4.04721	8.00667	23.9589	20.6599	18.842	16.7914
CD53	0.653206	0.995663	0.532181	1.37217	11.255	11.8584	14.2714
CD63	12.9474	24.9274	28.4904	41.6709	64.9227	83.2112	601.717
CD86	0	0.0714463	0.139717	11.4457	111.567	41.1383	573.739
CD9	0	0.0540407	0	9.79769	132.347	96.8377	629.415
CDA	0.30439	11.2252	7.46448	19.3735	110.022	94.9265	255.602
CDADC1	2.17833	4.49999	4.02789	11.0069	26.4945	13.3965	5.28093
CDC123	53.1832	635.764	814.174	628.343	410.654	381.018	177.604
CDC20	37.0133	180.15	186.734	72.4942	129.993	219.104	76.786
CDC20B	0.120217	1.86933	3.23771	5.05224	2.76511	1.41732	0
CDC23	0.225591	0.0654128	0.159456	8.87973	12.684	6.92431	11.8169
CDC25A	1.34807	18.6776	20.9307	20.3975	18.2921	15.5775	12.3704
CDC25B	1.64074	191.879	200.062	221.694	176.677	108.78	154.144
CDC25C	34.2701	86.6353	79.92	79.2802	66.8469	36.8655	36.7003
CDC26	39.9294	9.48346	6.05011	33.7715	292.382	165.307	173.212
CDC34	13.5073	70.7447	89.1074	67.5906	49.3332	30.548	17.3189
CDC37	0.884039	4.17356	2.91957	5.14107	30.0831	36.2379	20.7409
CDC42	71.6469	46.5543	72.8025	142.753	464.644	468.01	362.986
CDC42EP3	4.40142	3.45599	4.85732	5.27736	11.3818	8.72432	7.52996
CDC42EP4	0.0427323	1.18994	1.35977	2.08593	12.1137	9.82518	2.65708
CDC42SE1	77.4632	306.848	346.724	250.33	90.86	92.0666	32.7376
CDC42SE2	37.6016	194.081	208.348	171.101	78.8988	59.8486	50.1599
CDC45	6.76603	46.3334	49.6015	41.8732	14.5125	25.497	21.6951
CDC6	5.88483	21.7074	28.1221	40.5767	17.3183	14.4606	7.6191
CDCA2	6.20128	9.79075	9.22499	14.1835	11.5658	12.0901	3.83031
CDCA3	168.298	427.245	501.224	461.323	238.861	226.574	87.5552
CDCA5	0.933028	3.76503	3.20717	24.7807	37.1367	45.8372	8.04153
CDCA7L	8.29211	77.0577	149.122	137.824	66.1487	12.7333	2.06416
CDH13	8.60035	41.1632	47.7192	40.8117	24.8605	14.8782	0.902158
CDIP1	0.572136	5.45655	5.20866	3.4678	7.46106	7.39653	10.8256
CDIPT	3.94319	77.1778	98.0186	98.7662	55.7743	43.1862	26.2137
CDK1	15.5971	16.1751	14.3202	89.4223	416.519	239.589	171.788
CDK12	0.752608	1.00204	1.22242	2.8229	7.43552	7.69867	4.62365
CDK16	0.218848	2.00258	2.49374	3.34313	6.32053	5.31146	4.82582
CDK2	1.48388	6.32631	8.16058	11.4811	5.33153	6.58578	15.8582
CDK20	0.218467	0.666673	0.469645	0.863515	6.03237	6.97693	1.74695
CDK2AP2	153.669	449.87	553.68	386.494	289.147	204.302	31.2476
CDK4	4.78776	12.0261	17.2042	25.6955	16.2193	12.9723	22.915
CDK5RAP1	5.44132	7.81461	5.56445	12.2955	53.0798	33.0803	74.6447
CDK5RAP2	1.44272	6.35532	3.48053	4.10367	9.69685	16.7062	3.76774
CDK7	48.8971	36.9701	36.6642	42.54	318.04	217.868	255.384
CDK9	6.44974	40.6837	41.5381	12.8788	40.9205	63.1368	9.53172
CDKAL1	25.223	7.94768	5.71621	6.24242	15.284	20.5676	31.4775
CDKN1A	2.02298	14.2386	18.1982	11.0909	13.6847	87.678	159.358
CDKN2AIPNL	2.96366	22.4759	38.6046	29.2142	32.3107	22.9726	162.438
CDKN2B	6.36851	31.7168	36.6883	33.7875	20.2957	3.75488	0.838857
CDKN2D	5.18972	3.83267	6.08391	9.51774	13.9629	10.7343	9.02432
CDPF1	0.62986	3.15228	2.61764	5.5705	35.6077	46.798	31.6964
CDR1	10.0632	24.2884	30.3348	46.896	67.3814	97.0975	10.7341
CDV3	4.91038	61.8539	140.237	2418.49	0	0	4359.66
CEBPG	6.29076	1.94017	1.87279	1.982	7.57025	5.827	14.0372
CEBPZ	36.4794	47.4543	40.612	71.6117	136.791	141.489	112.855
CELF1	7.28713	24.3149	18.9649	17.8011	22.688	18.041	23.8576
CELF6	1.55726	5.65686	8.07575	6.31342	3.46718	2.5199	0.00889137
CENPF	9.86747	38.3928	40.7965	29.575	26.9801	39.1094	29.3039
CENPL	7.50037	6.38157	7.23214	10.021	31.52	14.0519	7.8663
CENPM	3.45278	21.5089	17.2699	8.50917	8.06607	8.0944	12.2485
CENPP	12.079	16.8067	20.4143	21.7085	50.9885	19.1875	17.931
CENPQ	22.9108	30.8401	36.3098	54.4131	54.8141	28.7854	21.0252
CENPT	0.916055	19.2797	25.0831	13.0307	37.5123	33.9638	36.7062
CENPX	0	0.706766	0	1.20126	19.1702	18.2837	38.7348
CEP112	0.31527	0.512494	0.706089	1.20202	6.71679	6.62326	1.6748
CEP19	2.41736	0.215129	0.630088	2.25258	6.93857	4.43798	1.92093
CEP55	14.0366	7.60484	13.1111	11.9608	50.6271	59.2727	100.573
CEP83	12.6255	33.0342	37.5901	27.9975	17.5228	10.7407	2.62766
CEP85L	1.76549	2.07065	2.58779	6.07789	16.9809	11.9929	1.77235
CEP89	19.4705	71.7715	67.5114	42.1319	21.1598	11.817	4.96661
CERS2	44.4267	144.882	138.141	133.024	42.0799	74.3581	53.7599
CERS5	29.3416	286.215	319.852	232.345	123.851	90.0864	34.192
CFAP20	102.75	6.87378	5.75093	29.1984	56.5888	79.6226	21.0047
CFAP206	11.7847	26.9899	29.7267	27.7071	14.2967	5.27234	0.692315
CFAP36	9.50689	7.621	3.55309	3.65203	28.286	16.4193	23.4453
CFAP44	51.8058	81.0503	101.898	127.49	57.7126	26.6301	3.39736
CFAP97	24.1609	44.3177	42.9779	48.6964	73.4064	29.8356	21.4884
CFDP1	2.62609	4.21822	3.22341	3.92286	10.6437	15.3389	48.1291
CFL1	0.910309	4.88799	26.1562	24.0455	19.9937	14.9337	45.6605
CFL2	6.82603	22.2644	28.493	27.2936	64.6143	51.619	62.6734
CGNL1	4.15311	13.8972	15.5981	12.0184	7.62656	5.04109	1.0694
CGRRF1	0.844723	0.154541	0.178061	3.28863	21.8959	22.5329	51.7246
CHAC1	6.5711	41.2073	46.3109	41.4536	28.7916	12.9141	29.4605
CHAC2	3.35371	1.68713	1.80142	3.46433	6.36266	6.37273	12.682
CHAF1A	7.87401	34.796	31.2716	14.736	16.9841	20.8675	3.62554
CHCHD1	13.567	5.14474	6.23798	9.48725	32.5405	23.1223	49.9732
CHCHD2	277	292.031	329.464	231.606	754.726	964.259	847.379
CHCHD4	19.2638	19.8806	21.1311	24.8107	127.716	143.449	65.1802
CHCHD5	74.3395	21.4045	11.8216	16.0456	38.5116	34.6907	23.4886
CHCHD7	22.9468	12.7579	5.37104	6.73614	14.5872	33.8652	6.48328
CHD1	12.2906	50.2211	42.4699	46.8945	150.464	117.207	61.7555
CHD2	3.86272	7.85912	8.71152	15.0495	11.1988	7.20327	10.9674
CHD4	9.04925	29.1595	29.329	28.1833	25.6445	27.8985	24.9335
CHEK2	3.12708	4.18555	5.42556	25.5269	57.1208	55.9708	62.1301
CHFR	0.433667	0.797141	0.69232	1.79619	5.06067	5.15441	5.99622
CHID1	0.16964	1.78114	1.06444	1.64657	34.9596	47.2502	64.593
CHMP1A	0.0234656	0.140315	0.425803	0.543721	11.3554	6.79437	5.18266
CHMP1B	33.409	84.9556	105.686	81.4891	62.915	71.5167	79.7389
CHMP2A	0.948087	0.462699	0.37646	6.85624	101.241	91.8015	198.785
CHMP2B	17.8215	15.8818	26.2191	15.2427	49.8342	49.5942	61.1304
CHMP4A	0.431286	0.299716	0.22044	1.2358	8.99612	5.39136	6.59426
CHMP7	3.19858	11.6514	12.4826	10.3656	7.05283	8.65964	10.2625
CHODL	349.376	695.478	633.077	761.961	181.924	234.17	0.91078
CHP1	11.9877	39.9079	47.3823	61.5591	36.5799	23.7816	22.0002
CHRNA1	2.63661	6.64545	5.832	7.62809	3.92525	2.36995	0
CHST10	6.33017	29.3127	34.6964	46.0234	17.5843	12.2849	0.857922
CHST11	1.23387	7.73745	12.072	8.74664	8.87313	2.75575	0.398809
CHST3	7.3952	20.0676	18.826	15.0218	8.22608	8.20543	0.224499
CHTOP	1.19191	15.299	25.5514	52.7106	126.361	293.158	67.6987
CIAO1	5.11938	9.56836	7.76326	9.14658	12.8191	12.6796	10.3941
CIAPIN1	2.35803	22.5168	32.6835	19.0098	23.8425	32.5658	414.796
CIB2	0.2986	7.26365	11.9713	17.0062	8.12637	1.48265	35.8896
CINP	1.21291	1.28287	0.459492	1.44936	13.1387	19.4289	13.1076
CIR1	25.0474	43.2583	48.3505	59.5877	169.343	94.7117	53.2653
CISD2	33.8055	23.0511	18.4444	18.4848	79.9408	63.49	203.635
CKAP2	128.444	179.109	238.083	264.96	199.38	187.923	117.669
CKAP4	2.05947	3.39629	1.93204	2.73171	5.24634	4.63465	7.81965
CKB	0.017924	2.62363	3.06822	10.0813	394.199	954.396	3925.26
CKMT1A	3.37468	19.7896	22.201	87.9634	136.469	160.882	45.6217
CKS2	1067.16	88.8237	22.4057	53.4528	155.016	170.503	6.15343
CLDN1	60.7369	134.254	157.171	154.649	158.274	75.5211	26.4765
CLDN6	0.137491	1.23997	0.683217	6.89629	161.738	182.128	899.534
CLDN7	12.8365	13.4097	5.65648	7.32432	13.1383	19.1274	14.7599
CLDN8	0	0	8.16145	66.5665	102.35	39.5909	819.542
CLDND1	11.5559	62.1456	125.217	204.327	147.672	34.6256	106.549
CLGN	13.2399	29.115	29.3496	37.9018	44.2574	19.6294	5.23936
CLIC4	64.7069	168.633	169.551	99.1368	140.349	221.389	1363.3
CLK1	9.26216	0.0148868	0.237585	2.66397	5.63371	7.63647	1.3502
CLK3	32.9041	89.2515	78.7938	65.2508	123.044	138.896	52.887
CLK4	6.89279	6.55178	4.26219	7.97674	19.4474	20.5059	15.1796
CLN3	2.61454	11.1344	9.25562	7.37857	21.6893	37.0928	29.3693
CLN8	1.93076	13.4801	14.1405	11.5577	6.90305	5.13182	167.889
CLP1	14.0765	13.1894	19.5736	84.762	133.829	184.772	28.2561
CLPB	1.43806	2.6658	2.37665	2.02022	5.87626	6.72802	20.1879
CLPP	3.41322	3.02967	4.13612	3.05952	18.4009	18.5486	32.2655
CLTA	65.6369	241.254	298.307	182.662	304.23	244.236	566.007
CLYBL	1.58085	4.10038	7.49952	5.90648	2.86568	3.06031	40.3724
CMSS1	4.7464	4.55539	4.50869	9.5972	115.161	126.981	145.278
CMTM6	13.0847	36.1202	45.297	63.8632	84.467	65.9198	126.425
CMTR1	7.2481	44.3765	31.9673	28.9339	10.0617	13.395	5.89903
CNBP	679.378	1142.23	1391.65	1656.62	3041.5	3682.93	2138.8
CNDP1	5.17481	20.2671	20.467	23.436	8.16374	4.46781	104.984
CNDP2	2.72033	10.6901	6.0994	6.6899	14.8458	15.6472	48.0928
CNIH1	79.5751	116.158	166.594	380.753	836.506	428.143	424.717
CNIH4	17.1653	14.6049	10.0987	17.1038	40.4679	27.7575	142.362
CNKSR1	7.23813	43.1059	35.4974	15.1139	13.6055	4.3189	6.86031
CNNM2	259.934	708.694	853.262	718.991	281.234	273.149	3.43968
CNOT1	2.96926	4.76763	4.69992	7.95071	8.04439	10.6385	13.3439
CNOT10	7.78315	12.3435	14.6131	11.6924	21.6235	25.517	28.4366
CNOT2	25.8562	18.4546	19.0771	24.2368	43.5674	41.1279	30.9682
CNOT9	6.70163	8.13356	3.9291	23.147	49.3965	39.1921	19.2757
CNP	41.2915	187.028	161.982	73.9963	125.838	71.5382	37.6683
CNPY2	7.92013	15.6175	17.1213	17.3567	19.9634	16.0654	150.537
CNTNAP2	4.83455	14.4506	14.3797	18.9889	11.5183	2.76042	0.352574
CNTROB	4.47795	30.538	33.234	16.8411	9.38718	3.48411	0.315026
COIL	2.71413	1.12984	0.908747	1.03139	11.5626	4.65648	13.1623
COL14A1	7.03916	18.3263	26.1648	22.5256	11.618	5.40858	0.306651
COLGALT2	6.07535	20.2266	24.8643	19.257	8.54365	6.72104	0.371734
COMMD1	8.76788	8.92993	7.10241	5.49862	14.828	21.5637	133.088
COMMD5	0.882923	14.314	17.4559	15.1351	65.5794	64.638	80.4905
COMMD6	4.09524	1.81665	1.86914	1.67471	13.023	16.5527	87.1822
COMMD8	192.765	109.794	90.3274	99.5907	184.092	100.235	95.5068
COMMD9	3.75423	23.8379	21.9524	17.857	69.4271	46.2414	71.7517
COPB2	51.7487	119.672	144.779	213.565	81.7198	44.5414	113.311
COPE	5.4382	12.6846	10.8808	10.9635	39.451	49.5121	75.4858
COPG1	9.85033	24.8372	23.4988	28.9282	11.4314	15.8968	41.598
COPS2	29.0125	50.987	66.8154	92.7473	212.389	131.632	80.2068
COPS3	0.544284	1.43289	1.34837	1.19465	8.27241	8.36076	19.1485
COPS5	16.3268	0.961965	0.521748	0.416405	8.6521	6.75421	17.8624
COPS6	1.75945	20.4443	21.3077	21.188	40.548	14.9327	240.812
COPS7A	0.303997	8.75383	10.4982	14.38	20.4012	11.0131	14.4752
COPS8	34.8332	191.862	231.822	164.173	304.882	366.393	79.2039
COPS9	24.0396	11.5009	7.99029	34.9917	144.014	154.432	184.338
COPZ1	2.08925	14.1346	18.777	22.0623	30.799	22.161	132.734
COQ10B	205.891	50.9822	53.7328	109.508	253.565	177.033	62.7427
COQ6	10.6853	36.4212	32.7523	22.9474	21.2357	21.5165	59.7637
COQ8B	0.457174	4.91179	6.43232	2.29499	5.35169	6.42357	12.2079
CORIN	1.67356	5.42849	6.3093	9.52154	4.48229	2.8387	0.142503
CORO1C	3.02435	33.9575	52.8666	67.3542	46.3393	44.8542	100.991
COTL1	0.949824	10.7197	9.78265	11.9266	29.6465	60.7514	95.4573
COX10	0.293458	3.44703	4.55812	4.33957	12.0826	17.4209	8.41207
COX17	154.83	44.1737	20.7844	52.1884	723.797	435.183	418.781
COX5B	224.195	12.1491	2.40272	4.7892	25.1372	35.2896	11.9474
COX6A1	115.951	87.1037	59.6335	168.779	662.773	709.053	1728
COX6B	59.9642	2.55206	0.507645	0.268896	5.05699	7.90091	5.69369
COX6C	709.223	123.218	98.2629	131.346	373.368	834.799	784.091
COX7A2	67.949	13.7693	8.89346	58.1331	385.592	375.735	433.635
CPA1	0.843208	4.34497	5.41624	6.14376	4.28449	8.06127	1.46591
CPEB1	9.83486	102.366	84.0656	59.0412	23.8984	21.8146	1.35842
CPEB2	17.2233	7.04376	4.38607	7.16533	9.27909	21.5737	8.1695
CPM	27.2959	71.6984	89.0841	105.197	59.7616	38.9496	5.25427
CPNE3	3.91202	2.43859	2.3792	3.33002	10.7598	5.21054	18.3304
CPNE9	0.126926	0.101499	0.0191791	0.580175	7.99315	8.55778	1.20262
CPPED1	0.542331	1.5531	2.55676	4.14327	64.9276	96.0454	490.649
CPSF3	2.60876	10.1196	10.11	11.8919	13.6514	17.0666	66.8857
CPSF6	4.78384	24.6756	30.5971	81.8394	116.65	101.841	170.252
CPT1A	0	0.0413267	0.0225707	3.89271	34.1775	48.2851	7.27393
CRABP1	1.6706	4.61165	4.46638	9.21755	2.7702	12.6406	1.58004
CRABP2	0.0512681	0.185339	1.69242	5.46985	25.2763	38.4622	43.5206
CRB3	0.241698	6.15948	11.4086	10.9725	14.7124	6.30395	9.28209
CRBN	50.1323	103.71	136.371	137.786	69.6314	45.9619	101.321
CRCP	58.8277	168.586	158.861	131.316	91.8073	136.017	115.872
CREB3	1.6872	3.77321	3.95905	5.74133	17.4571	18.4672	34.8998
CREB5	1.26914	11.871	14.7171	16.9021	8.52578	4.44939	4.19722
CREBL2	2.85208	4.76438	6.48139	10.3901	8.15216	1.77229	39.9753
CREBRF	1.95736	3.39878	4.19149	14.7555	15.0485	18.7884	4.93725
CREBZF	0.132562	0.0709055	0.645513	3.02043	5.06875	4.49455	6.69985
CRHR1	0.146745	5.57878	7.25197	7.29652	3.26635	1.53991	0.227766
CRIM1	1.96116	5.50091	7.45321	12.3484	3.78004	4.21931	5.66031
CRIPT	21.9899	46.8845	54.7307	54.735	69.2783	44.196	44.3895
CRSP3	11.3641	22.3505	17.7519	30.7222	20.0758	18.6315	4.05049
CRY1	13.0749	7.45741	8.74052	14.9296	34.5256	12.5277	17.2887
CRY2	0.150226	2.40071	2.7978	3.05848	9.48947	11.0413	1.94844
CRYL1	0.177767	0.80011	0.434267	0.66479	7.90093	12.9734	1.58654
CRYM	28.3833	94.4607	110.392	71.4236	41.42	44.3098	8.18881
CS	86.5634	274.261	311.746	417.736	280.24	148.129	196.031
CSDE1	46.4242	273.401	314.255	525.984	560.769	292.25	631.457
CSE1L	6.61905	3.57511	2.36925	3.05252	7.80199	7.12367	15.5727
CSK	0.870812	10.3718	13.2662	7.99701	7.71296	7.57999	6.60517
CSNK1A1	13.3472	8.60385	13.7052	27.4155	47.9516	54.5829	41.0599
CSNK1G1	4.62661	7.9327	9.38373	15.5479	24.6583	31.8327	37.3322
CSNK1G2	1.67956	4.75643	4.79925	3.33604	5.16824	6.64973	3.36696
CSPP1	73.3707	129.406	134.812	147.787	56.7357	40.5787	8.01458
CSRNP1	0.0657174	0.349735	0.709937	9.76421	19.2556	33.1915	6.46694
CSTB	9.10835	3.00435	2.36519	8.34784	78.0407	95.3273	424.499
CSTF1	49.7545	84.5681	77.1361	76.1794	111.743	120.926	32.6672
CSTF2	1.1234	10.9003	15.0378	14.6816	56.4419	38.9006	71.1109
CSTF2T	0.015702	0.0111616	0.0748565	3.13624	10.2008	10.2474	36.8272
CSTF3	9.58124	7.45307	7.96557	29.9018	46.229	78.7828	34.9788
CT55	7.30823	3.08215	1.58087	10.5015	73.8586	79.1422	72.9813
CTC1	3.10578	17.1816	15.7031	13.8837	4.15471	2.77332	5.20807
CTCF	10.8989	12.2484	12.5244	24.5285	21.9522	26.1609	12.8111
CTDSPL2	7.95146	3.4857	3.46451	5.96893	8.61959	9.63313	4.34847
CTGF	0.0105108	0.0874157	1.50571	22.9043	65.8576	31.3261	6.98673
CTH	4.12692	3.132	5.00041	6.58105	8.94863	10.2764	429.178
CTNNA1	25.4194	89.2247	78.8029	74.4651	48.4234	33.3911	63.9079
CTNNBIP1	0.125248	2.07673	4.50368	3.5155	6.06632	11.5109	10.0307
CTNNBL1	9.30887	12.1136	16.8469	14.4049	20.0975	24.029	9.85055
CTNS	0.592229	11.6952	9.90618	8.735	7.77964	3.94699	27.3271
CTPS1	1.80121	2.76565	3.07179	3.15536	9.76965	15.6929	5.68711
CTSB	18.8681	56.9592	30.1701	40.3495	52.8876	118.233	115.006
CTSV	5.34546	5.91974	11.3053	72.664	119.924	167.89	298.502
CTU2	0.268471	0.27277	0.261306	1.38466	8.2858	7.72463	2.82739
CUL2	0.569971	0.170532	0.411829	1.36127	9.53679	9.7593	17.0529
CUL5	9.38563	3.19152	2.62671	3.48696	7.80051	8.61181	14.4671
CUL7	1.25785	7.01233	10.1006	7.93697	2.58589	2.16216	1.23912
CUNH14orf2	2.33963	2.45466	0.634196	16.0736	179.217	237.786	266.47
CUNH9orf116	2.16055	9.9732	13.5409	10.7982	2.80893	0.905969	0.396923
CUTA	9.1396	3.66945	2.34704	3.85872	40.0539	46.5844	61.2712
CUTC	4.25448	4.16725	6.17541	7.55335	82.0329	44.3376	70.9243
CWC15	149.604	139.42	203.238	372.626	664.463	440.406	167.503
CWC22	16.5458	40.5654	44.6431	49.3576	39.2344	29.8041	18.1141
CXCL13	25.2441	52.2713	68.1096	103.551	44.2034	43.755	0.479807
CXCL16	0.046796	0.364471	0.73916	16.0069	52.2012	67.987	13.5667
CXCR4	5.53359	0.908091	1.99313	2.30003	5.03113	6.3868	2.20015
CXXC1	8.26969	30.0399	26.5352	18.1202	13.9906	13.989	8.86151
CYB5B	112.993	61.0705	81.7585	128.33	174.409	134.728	67.1225
CYB5R1	0.13851	1.91569	2.30972	3.43987	6.99762	6.83892	47.6221
CYFIP2	2.6691	10.8919	11.4158	11.802	6.06479	2.69171	0.125925
CYP26A1	13.812	23.205	26.0352	19.5594	44.5084	42.2015	78.29
CYP2D25	0.0268707	0.816475	0.831344	3.60402	6.96772	1.67098	91.9507
CYP2J34	2.00087	6.58097	6.08225	9.3878	3.48638	3.98669	0.888149
CYP3A29	7.71041	29.7139	38.6582	42.7786	12.1252	6.6987	0.708348
CYTH2	0.112426	1.11385	1.78402	3.5285	10.5472	18.782	9.01216
DAAM1	47.6301	82.4083	107.133	123.533	55.6832	40.711	14.7626
DAD1	79.9676	65.6865	47.0762	54.6922	156.723	141.448	349
DAP	3.50131	23.2883	18.8015	19.104	14.7078	16.7791	57.1975
DAP3	2.1987	1.18903	0.538721	3.41731	25.4594	24.0389	48.261
DAXX	1.51479	10.0621	8.81243	4.67341	5.76903	9.78561	5.79669
DAZAP2	321.338	992.91	838.015	984.225	858.783	720.323	123.143
DBF4	20.1562	14.506	11.4534	14.0871	54.5994	55.5881	19.8749
DBR1	0.0415606	0.141322	8.61566	54.9012	58.6057	81.2734	21.2958
DCAF1	5.08991	15.8201	17.6518	23.097	16.3877	11.2224	13.0058
DCAF11	0.0804257	0.595255	1.70875	6.12508	9.24293	6.01784	13.0541
DCAF12	1.07304	2.03927	1.72685	4.12434	6.20829	12.7408	11.279
DCAF13	19.0268	25.8253	29.507	67.3166	199.888	189.592	86.5626
DCAF4	2.4562	2.78315	2.75453	2.82972	7.56159	5.15184	4.38941
DCAF5	8.57657	11.5612	12.1634	18.2164	19.8745	11.5407	9.0617
DCAF8	23.5398	118.979	123.065	92.5327	53.0492	38.4347	28.9084
DCC	7.66117	15.2471	16.9525	18.4664	6.22161	5.06829	0.234797
DCK	10.5082	20.102	25.2006	32.3957	44.7033	30.1063	8.63298
DCLK1	9.30513	18.2565	19.3945	19.8249	11.8206	5.82503	2.06505
DCLRE1C	1.69048	1.1332	0.658822	0.867549	5.17653	2.59641	3.98768
DCN	0.778382	1.18225	1.25619	29.5168	2.12857	1.75587	2.37731
DCP1A	31.651	78.0482	95.7303	138.814	165.116	108.996	71.6236
DCPS	18.2803	6.30514	2.42561	3.28597	6.61433	12.5875	7.77352
DCTN2	0.0921267	0.39064	0.45679	0.773841	6.61185	12.5294	78.9266
DCTN3	5.51118	4.6479	8.88688	6.48579	36.3129	27.2745	99.5683
DCTN5	22.8585	8.68366	6.88388	5.48202	17.974	17.4182	32.772
DCTPP1	606.853	1619.53	2229.31	1486.16	522.031	572.543	48.7101
DCUN1D3	0.116215	0.720115	0.914808	4.97084	7.33638	5.37212	2.62874
DCUN1D5	44.2534	77.2508	58.6052	39.1504	111.997	152.473	26.4554
DDA1	16.4026	54.3398	56.7768	36.6357	44.4941	37.0228	13.3521
DDB1	0.586078	6.56076	7.20706	8.45038	2.69442	6.60956	11.9695
DDB2	3.83478	33.6711	25.7548	24.1848	11.6408	10.6303	0.8414
DDHD1	11.6645	21.6625	32.6362	27.8229	14.418	7.48163	2.84674
DDIT3	56.7152	80.4258	103.147	371.766	441.021	516.932	550.117
DDIT4L	11.2122	33.4243	30.4606	44.2075	71.824	40.6544	4.88256
DDOST	9.00907	4.70201	2.29735	8.71114	22.7035	19.959	36.3912
DDX1	26.4099	14.0575	9.88419	15.5403	37.54	35.6764	35.3284
DDX10	17.9256	46.8984	37.214	37.4489	58.6537	56.8615	20.8738
DDX17	54.3418	109.235	88.9534	82.7534	147.078	148.103	390.65
DDX19A	2.73524	8.37227	8.73186	11.8337	28.6339	36.8969	35.4318
DDX20	15.7622	2.55684	2.07829	2.23125	6.31789	5.38179	2.19118
DDX23	0.841723	6.40175	6.86954	10.0267	24.718	24.1311	35.5886
DDX24	42.4386	45.0615	37.8003	62.3564	84.3202	91.1954	40.9496
DDX27	2.50865	38.3787	24.6384	65.5251	259.585	387.944	144.508
DDX28	1.17276	2.21127	1.15621	3.12923	7.5974	10.7172	3.38454
DDX39A	28.4867	149.725	187.501	584.857	762.243	643.324	374.269
DDX39B	2.15233	50.4355	75.1249	108.497	180.646	159.356	157.164
DDX3X	83.013	26.3288	22.0984	54.506	43.0345	48.7701	23.7526
DDX41	0.165878	2.05543	2.29488	2.98335	5.4445	4.07378	10.1827
DDX46	23.117	69.0655	75.5895	77.7017	67.3948	51.2274	36.2649
DDX47	6.43346	14.3248	13.451	63.7994	174.788	150.946	147.037
DDX49	2.85037	9.89321	5.09963	5.18318	55.2867	51.5281	19.3827
DDX5	52.6735	84.8697	114.532	268.33	442.782	491.52	334.32
DDX51	0.00773912	0.0827859	0.139359	1.4415	6.43145	11.3893	1.52331
DDX52	27.5334	22.6757	19.0048	23.6691	46.696	50.3338	39.5175
DDX55	12.3019	128.511	174.972	176.144	112.121	49.7403	44.4875
DDX56	0.149021	0.784025	0.399386	5.27778	55.3319	78.8272	26.3851
DDX6	6.25784	7.61882	8.27026	9.94867	20.3451	19.1565	55.428
DECR1	10.0055	37.9276	51.7501	55.2894	26.4866	4.49609	9.34743
DEDD	75.6561	278.702	325.671	335.637	221.921	119.427	66.6118
DEGS1	100.899	63.7695	50.1799	94.2718	129.099	109.844	206.841
DEGS2	0.872575	15.4366	11.7467	5.57523	4.77512	5.3284	13.3404
DENND5B	2.38145	6.2298	4.07497	4.24972	6.5974	5.75761	5.23955
DENR	1.21637	0.479813	1.43913	12.3023	76.299	92.8024	142.638
DEPDC1	3.88127	2.51313	2.35981	4.2119	9.31456	7.9222	14.8237
DEPDC5	1.92794	8.89508	8.50878	7.94982	3.99965	2.80938	3.49974
DERL1	4.83656	9.97554	12.1149	13.1949	71.7566	56.6121	51.2297
DERL2	8.97887	29.8242	33.284	27.7831	36.1808	18.5212	46.7606
DESI1	1.15607	4.42854	5.38571	5.72226	2.20522	1.7485	1.78744
DFFA	1.99286	14.3414	13.9745	10.9141	2.05987	4.1095	35.6159
DGCR14	6.03041	13.7207	13.1055	5.6612	12.1218	17.2283	6.31328
DGCR6L	0.378367	3.4028	3.71076	5.2356	17.4382	17.4615	68.9961
DGCR8	1.05596	14.3494	15.9731	8.29138	7.4975	7.81023	8.64401
DGKB	3.42642	19.7367	24.8548	25.5553	10.8258	5.60741	1.28235
DGKG	1.25274	2.7869	2.68192	5.94834	5.03125	1.46954	0.23294
DHDDS	0.340823	14.2246	15.9239	20.4147	53.5253	27.1986	42.0357
DHDH	0.11217	0.308082	0.291456	0.999691	5.51777	4.44208	18.5357
DHFR	4.54544	3.91314	3.44086	2.6014	20.8854	39.7634	63.2184
DHPS	0.172951	2.4848	2.24268	2.59816	11.9289	9.88617	40.63
DHRS7	9.37842	11.2934	7.03483	7.02207	33.6489	40.3942	25.1353
DHRS7B	0.342498	1.46777	1.13647	0.717477	6.67607	3.57238	9.09465
DHX15	3.07147	1.62831	2.26515	23.4318	43.2015	52.0433	26.5445
DHX29	2.2028	3.77731	2.74649	2.84569	14.3313	14.8533	16.4201
DHX35	2.03067	6.58202	7.87609	10.7846	11.1231	7.18214	7.08355
DHX38	2.57438	5.27894	4.58605	3.99267	6.833	7.91924	2.14802
DHX8	2.25066	4.17839	2.93558	6.7457	13.3188	23.5228	4.31566
DHX9	0.956235	0.752723	0.979849	9.75239	17.5387	16.815	8.82591
DIABLO	0.338183	0.524006	0.172775	4.39413	20.2077	18.0295	31.4649
DIAPH2	3.4623	4.8935	6.96272	7.55972	7.31736	3.59073	1.47482
DIAPH3	3.83891	3.58904	3.18467	3.84698	6.97324	5.18678	6.41314
DIEXF	0.46416	1.69587	1.30295	3.71179	13.8023	10.4165	5.36853
DIRAS2	12.8249	38.5857	37.0982	34.1446	18.6461	13.7018	0.777892
DIS3	5.79427	4.37129	3.15062	15.7867	18.5542	12.7279	8.16688
DISP1	0.694752	1.02879	0.687201	0.763014	5.87432	7.19173	3.00953
DKC1	2.59194	19.5155	11.2125	13.2029	57.2928	71.0818	43.2269
DKKL1	0.245743	0.125443	1.54394	12.1649	17.064	11.276	10.0572
DLC1	0.00981493	0.0290251	0.279117	5.2242	11.3965	9.93633	30.938
DLD	12.2317	9.62724	9.11008	17.6425	158.201	161.921	916.787
DLEC1	2.97813	12.1513	12.658	9.73351	3.98716	3.92498	0.539764
DLG2	2.68813	23.214	25.922	27.651	17.5476	7.26845	0.444286
DLGAP4	1.25483	23.6002	22.8074	20.8691	14.4608	4.40696	7.89861
DLGAP5	231.75	399.271	438.41	496.286	273.853	162.488	119.625
DLST	3.63352	40.9692	42.3148	49.0734	57.2063	86.6848	92.468
DLX4	1.18722	21.1588	31.8531	25.6099	11.7801	3.40947	23.9089
DLX6	3.14639	0.908965	2.52459	17.0096	15.0455	9.42927	5.36226
DMTF1	3.97056	2.5959	1.77956	8.23674	17.6581	25.4188	8.83787
DNAAF2	6.51486	8.53281	8.4066	4.9188	16.7645	23.3051	9.88991
DNAJA2	5.75965	112.226	118.266	110.051	118.908	42.3028	84.0442
DNAJB1	53.4778	35.1887	35.9499	125.844	201.139	202.619	27.099
DNAJB11	6.26717	9.83895	9.44903	22.6998	63.789	56.4455	36.8469
DNAJB12	0.322127	0.958705	0.941975	2.56273	15.2319	8.30364	3.70383
DNAJB9	24.1764	8.12231	10.1338	30.9676	58.0159	72.3788	31.5378
DNAJC10	2.94297	2.48681	2.06035	4.90621	10.176	8.19159	11.4761
DNAJC11	0.717661	3.45559	3.46933	2.87329	22.3868	27.7397	19.5154
DNAJC14	2.67141	26.3	33.0769	46.554	32.4349	10.8541	14.8054
DNAJC18	3.39677	13.2913	11.9894	13.4101	19.985	11.723	18.9555
DNAJC19	79.9217	5.03985	2.86229	2.13717	36.6956	35.2612	41.7363
DNAJC22	1.25575	6.16187	5.98898	6.56195	4.64303	1.31145	5.97893
DNAJC24	74.4032	28.7432	23.1054	18.2826	50.386	41.4918	90.2466
DNAJC30	0.661536	3.5821	4.82533	4.5832	6.37931	6.27242	4.08109
DNAJC7	66.245	116.714	162.39	142.036	168.492	102.737	35.0488
DNAL1	6.99241	5.32871	5.92778	8.80763	13.7919	3.82032	1.45174
DNAL4	13.8797	35.9757	34.94	36.0484	10.9241	7.24017	0.598551
DNM3	4.30884	7.48691	7.05949	9.62537	4.41161	2.35647	0.152671
DNMT1	0	0	0	2971.56	1746.49	2493.67	27.7916
DNMT3A	25.1294	127.109	151.473	163.834	93.8159	77.6125	21.5594
DNPEP	1.09926	5.06623	5.95397	6.76651	27.1683	128.124	95.2321
DNTTIP2	69.1647	175.599	181.151	303.142	392.975	220.096	118.697
DOCK5	2.73471	6.15522	6.79148	7.48658	2.87871	1.67088	0.35136
DOHH	0.195086	3.10284	2.87437	2.70121	34.4654	46.6491	6.32204
DOLK	5.55376	19.8784	20.3139	15.2396	7.81958	9.89596	11.1866
DOLPP1	0.202194	0.553296	0.573481	1.37191	5.16646	5.58961	5.49724
DPCD	5.02035	2.3651	1.9254	1.86284	20.3259	22.3322	80.7013
DPF2	22.7592	147.959	159.706	160.534	85.6919	66.4364	45.8418
DPH2	0	0.299446	0.482001	3.42819	14.6806	7.53383	7.87958
DPH3	21.5034	42.8754	62.7149	88.0042	90.9659	73.8	53.8171
DPH6	5.67526	3.47898	2.36709	3.49163	6.0429	9.64998	15.0567
DPM1	19.2116	48.1879	72.1462	97.7778	314.135	215.938	495.215
DPPA2	2.9981	1.091	3.1712	81.7449	271.716	163.898	168.109
DPPA4	4.27555	2.73158	10.6134	42.4282	140.914	90.6119	36.5646
DPRX	0	0.0950375	0.274865	21.0164	73.3276	40.3919	7.71085
DPYSL2	0.540593	10.2577	10.6953	19.1076	24.5307	10.8224	2.67439
DRAM2	15.6362	16.6481	10.7642	8.06675	50.0131	29.9877	223.567
DRG1	7.32826	15.4604	17.9605	34.0849	224.466	208.721	337.047
DSCR3	0.971715	12.1262	11.2637	9.02455	11.2421	9.47899	17.5143
DSN1	6.22864	26.5671	25.266	17.8062	38.1598	36.7252	20.2052
DTD1	17.4034	36.601	32.2546	29.788	63.7352	33.8508	151.403
DTNA	2.73693	9.15472	10.3886	15.1	8.26416	4.25893	0.652442
DTWD2	0.70081	1.33053	1.15289	2.27088	11.1042	10.6958	11.6711
DTYMK	6.49901	7.81493	5.3074	3.26795	39.6841	17.2783	53.2474
DUS2	0.302686	0.882318	0.893306	1.25352	9.25136	6.31016	23.566
DUS3L	0.152793	1.06353	0.857074	4.5995	20.708	35.0883	6.30741
DUSP1	7.08732	5.17365	3.48278	14.5081	70.1789	174.211	25.5209
DUSP11	150.01	17.75	6.81993	4.63957	22.8532	25.1248	11.4571
DUSP14	37.7662	59.5281	36.5672	27.4301	84.9361	58.493	35.3768
DUSP16	3.58159	23.6147	17.1595	13.611	11.6523	6.28394	49.5871
DUSP18	4.603	12.8495	13.1636	10.5581	12.5405	10.4221	16.1954
DUSP5	1.71695	2.38875	4.48215	5.63368	8.59714	20.2407	11.3623
DUXA	42.9289	87.4535	105.901	113.363	156.17	51.9741	2.64475
DYDC2	7.39276	29.6815	30.3997	16.6561	9.7684	6.61745	0.154972
DYNC1LI1	0.76712	0.312334	0.431439	3.69169	18.6411	25.5932	20.6938
DYNC1LI2	32.7455	101.437	113.729	121.191	121.833	60.6125	92.3395
DYNLL2	51.034	174.857	267.136	364.858	271.775	36.6183	9.06236
DYNLRB1	3.78162	11.0338	15.3135	17.0683	38.9536	15.5473	215.353
DYRK1A	5.24395	93.6789	141.619	158.936	96.0539	37.5212	93.0305
DZANK1	1.16561	6.67991	6.33343	7.74241	5.43019	3.24056	2.07465
DZIP3	16.1372	32.1379	41.7316	46.5307	20.319	11.3166	2.66505
E2F3	1.19123	6.28069	8.77946	13.3183	6.69572	3.45415	7.48173
EAF1	0.744346	2.98181	4.24402	7.2232	4.99788	5.05864	6.6163
EAPP	28.3804	8.0987	7.65049	25.7305	178.572	179.071	113.313
EBAG9	15.6659	19.3183	27.9076	27.9469	31.777	11.2125	12.1234
EBF1	47.9478	243.128	192.564	160.598	83.9646	59.9258	3.36766
EBNA1BP2	0.648164	1.67028	1.16449	9.2518	42.4557	64.1973	14.7527
EBP	29.0036	105.122	132.001	132.825	130.317	113.193	163.244
ECD	23.7008	15.0018	10.9588	17.6858	92.8088	69.2041	63.1153
ECE2	0.108576	1.00133	1.0867	0.731224	6.04538	7.60253	29.5461
ECH1	6.23363	13.3964	19.0545	15.5938	9.52442	8.79158	144.983
ECHS1	4.96899	6.04756	2.13442	0.758779	6.98964	13.3056	220.181
ECSIT	2.21883	12.3575	15.4845	12.6913	33.5673	24.1302	112.051
EDC3	5.72002	19.0361	24.1807	19.9792	13.1509	10.5499	34.5866
EDF1	0.0981044	2.28244	3.01265	3.64427	7.22154	5.31353	7.23845
EDNRB	2.14233	2.61917	3.13536	5.68044	1.75417	2.56947	0.637101
EED	0.740546	0.688713	0.681481	23.9404	199.894	198.954	209.84
EEF1A1	134.952	311.639	514.526	871.582	1165.96	1682.27	4967.75
EEF1AKMT2	2.99991	3.65084	4.06406	6.63144	24.3684	28.9749	26.1022
EEF1B2	15.2614	57.7126	52.7256	250.207	1388.71	1571.72	2513.04
EEF1D	0.489322	1.46504	2.01709	2.25438	59.7169	94.4121	71.0675
EEF1E1	22.8855	8.964	7.71001	46.7913	265.142	193.17	111.732
EEF1G	1.37336	2.20761	1.53123	5.83162	178.34	292.529	1262.94
EEF2	6.04272	39.4635	36.5012	77.8733	332.5	490.594	873.46
EFCAB14	12.9353	68.3482	48.5991	51.8161	32.557	13.3114	40.2375
EFHC1	8.41032	40.9191	47.9797	50.3531	19.5864	7.46364	7.28829
EFHC2	27.0682	64.3357	73.5451	85.4038	28.4529	13.9227	1.9042
EFHD1	0	0.0586853	0.0264175	0.807941	41.2221	54.9822	2.52228
EFNA1	31.7086	37.5285	23.5009	40.7047	63.3142	87.8889	83.1427
EFNB1	0.421437	8.18486	7.26589	15.0002	24.5225	21.8974	4.50333
EFTUD2	6.96301	8.11396	6.71318	6.26071	21.4564	23.9948	24.9196
EGFLAM	2.02698	13.7544	13.9024	15.6615	12.1113	8.08066	0.58899
EGLN2	0.346898	1.10016	1.14969	2.50186	8.23118	9.19125	13.2237
EHD4	1.82898	6.02871	6.94469	4.3168	7.27002	7.25867	6.8883
EHMT2	1.46809	6.4026	6.47358	5.95889	1.71191	1.56353	1.28828
EI24	3.98441	9.54098	9.46828	9.60088	9.48614	13.5447	90.9208
EIF1	596.952	1795.39	1811.09	2610.12	2360.39	2052.6	809.888
EIF1AD	2.38586	1.82844	3.22929	31.6851	137.258	83.5292	42.4976
EIF1AX	8.94862	6.14073	6.78589	33.5692	128.368	97.3714	65.4966
EIF1B	65.6828	97.0345	60.5338	101.451	169.545	104.268	69.8277
EIF2AK2	15.7453	41.9767	40.104	38.5641	26.4072	11.5487	14.5649
EIF2B2	0.413383	1.79163	1.89848	56.6385	270.275	291.768	129.639
EIF2B3	2.42277	19.7514	20.5493	15.3879	50.2004	38.764	141.451
EIF2B5	0.285276	0.213293	0.202894	1.4115	9.0021	11.2517	35.9189
EIF2D	0.695405	4.52464	3.69151	3.31007	5.1786	4.31859	31.5965
EIF2S1	19.5254	12.3808	10.9743	29.4212	264.461	240.193	252.22
EIF2S2	105.85	65.1176	65.0092	154.731	835.091	685.553	1663.19
EIF2S3	10.1127	8.74775	7.7148	7.23111	31.6182	28.242	50.4992
EIF3A	2.36289	3.68008	2.78105	19.5208	90.1708	109.834	74.2097
EIF3D	2.41605	2.51961	1.9674	4.80343	15.0281	22.2508	29.854
EIF3G	1.24235	1.69948	2.11083	30.4247	243.848	220.801	347.592
EIF3H	37.1407	58.8972	51.57	189.796	1006.88	1045.59	797.893
EIF3I	45.3591	90.3135	132.561	157.853	619.643	530.699	657.683
EIF3J	60.3335	55.7389	59.003	93.2262	207.587	169.466	116.336
EIF3K	38.3037	4.65825	1.48216	3.18616	12.9767	26.2049	7.72646
EIF3L	22.8287	67.401	54.8397	58.8149	183.692	200.53	129.634
EIF3M	199.529	208.772	275.785	722.835	1764.11	1585.78	947.016
EIF4A1	60.5333	34.3773	42.4077	94.897	255.965	303.021	431.366
EIF4A2	227.901	252.62	345.362	330.421	665.277	898.205	1871.41
EIF4A3	53.5178	31.7817	32.4534	38.2594	84.7269	107.566	62.9647
EIF4E	55.7144	41.7873	43.6219	52.5574	240.09	146.447	150.81
EIF4E1B	23.8408	175.054	182.831	143.047	75.4152	30.7067	0.651032
EIF4E2	20.6666	21.9983	15.8989	16.9548	52.0864	36.7854	45.6015
EIF4EBP1	8.71564	37.136	35.9396	21.3739	73.1342	63.1811	201.341
EIF4G1	0.710818	2.51813	2.29688	6.71956	25.2904	38.4933	28.1271
EIF5	93.6097	175.892	178.988	140.928	367.127	316.38	138.987
EIF5A	37.7059	108.309	117.898	105.453	597.59	512.493	386.211
EIF5A2	9.67759	6.50615	6.39043	8.88751	17.7628	12.0417	6.10821
EIF6	2.71063	78.6353	78.2137	445.251	1701.87	1664.56	1037.83
EIPR1	0.209075	0.56302	0.405291	0.485994	6.83577	9.69651	5.36882
ELL	4.40963	29.4414	30.833	19.975	17.1362	13.3168	8.52514
ELL2	7.07773	19.0761	20.2541	124.536	255.614	162.094	315.754
ELMO2	2.59893	9.08744	5.94592	6.62611	7.0609	7.25067	12.7625
ELMOD2	6.3116	3.543	2.86362	4.50989	5.79712	3.73241	8.74188
ELMOD3	0.516199	6.65226	8.28127	9.23744	2.77211	1.87327	7.4865
ELMSAN1	0.112357	0.462233	0.81757	2.08633	6.06177	2.11075	8.55174
ELOA	2.56868	23.7691	27.0176	26.21	22.165	18.2889	32.9378
ELOB	1.52449	0.19497	0.0637615	0.401278	5.33693	2.06832	6.07608
ELOF1	0.352459	6.9911	9.24703	26.4093	136.286	81.1294	65.3038
ELOVL5	4.96976	42.5151	38.8724	39.7497	193.721	151.171	92.8751
ELP3	19.3541	39.337	43.5656	43.8754	34.7992	19.0603	20.8142
ELP6	4.14321	4.12427	2.86538	3.79724	33.697	31.0376	20.8772
EMC3	1.66804	6.41988	11.9757	29.329	160.115	151.086	99.3266
EMC4	13.217	1.89773	0.338113	3.57235	23.9409	25.7782	17.9198
EMC7	0.844226	3.01115	6.49065	40.5029	299.123	218.332	244.041
EMG1	0.817222	1.29875	3.83387	97.2917	338.676	365.479	100.22
ENO1	0.84775	2.26109	2.09174	3.3905	15.8377	44.647	179.422
ENOPH1	1.45301	3.69246	3.89545	2.25887	7.30201	11.4106	5.96424
ENPP4	0.122068	0.539527	0.489993	4.84626	28.223	12.2671	13.114
ENSA	2.14169	6.46262	7.80045	11.0749	28.2231	14.275	32.8728
ENTPD5	20.1938	45.0434	49.7039	59.6489	24.049	14.854	1.81795
EPAS1	0.576072	10.5157	11.4271	5.05046	3.65191	1.26673	0.769937
EPB41	8.08967	20.0009	23.642	18.7052	10.9876	8.20751	26.5469
EPC2	1.23646	0.455536	0.800624	2.28082	5.77784	6.72682	6.82116
EPCAM	50.5082	33.8978	42.5831	92.6846	105.089	33.1733	200.188
EPG5	1.30325	4.07812	3.81658	4.55697	15.5215	13.1676	14.5314
EPHA6	8.84333	18.3373	17.9801	19.8314	10.5563	11.3932	0.0744518
EPHX1	0.643477	7.4642	7.91204	6.72654	4.21298	6.49307	18.2342
EPS15	5.16072	14.6349	16.321	18.8969	5.92105	4.58541	16.523
EPS15L1	1.06608	8.20713	10.3325	11.0062	10.5936	11.9677	12.1014
ERAL1	1.30251	9.33123	10.1755	3.79113	12.6372	18.7753	40.0999
ERAP1	3.04537	6.86335	7.57279	10.0415	4.98265	1.23247	0.420061
ERC2	14.4088	53.9656	69.0523	110.554	66.5143	27.5795	13.7328
ERCC1	1.31811	2.85931	1.75167	0.8528	7.61531	6.77321	14.3665
ERCC6L2	3.85494	5.87125	6.79362	9.58508	7.18433	2.2719	2.87321
ERGIC3	7.41134	9.14665	13.5513	14.5975	15.9161	13.1604	46.2597
ERH	22.6145	6.44689	7.27193	24.0462	103.75	100.932	29.112
ERI1	6.37458	3.43676	3.23777	3.34445	10.4672	7.79338	2.96101
ERICH1	5.3258	3.19289	2.2827	2.2601	12.6018	7.66377	4.61777
ERICH6B	2.16701	7.64869	9.92671	6.86711	3.92339	3.62121	0.103327
ERP29	1.64499	6.41262	6.67671	7.53355	10.7385	9.05303	54.1394
ESCO1	6.15335	4.28837	3.18862	6.18047	28.5891	12.9231	4.96831
ESD	5.61205	2.83846	2.04054	1.29245	5.15793	3.42658	30.5023
ESR2	1.78028	5.60878	6.30748	6.40183	2.4226	1.65341	0.103404
ESRRB	0.255225	0.306521	0.109229	1.33787	13.2081	13.6595	17.5448
ETF1	2.88221	3.36727	4.31715	49.3998	172.003	216.501	175.874
ETFB	0.45105	0.279526	1.22618	2.31402	46.6887	74.4029	517.483
ETHE1	3.76594	9.3633	4.45	16.4004	110.821	85.0305	47.5541
ETNPPL	0.444656	0.714859	0.858926	4.19988	23.7278	21.2943	105.56
ETV3	1.79431	3.34165	3.41829	6.83538	12.8055	12.7807	16.2625
ETV5	3.47411	10.0775	11.529	21.6615	15.6711	10.146	0.411337
EWSR1	1.27022	4.70984	5.0774	30.6853	96.9171	75.3502	113.959
EXO5	4.71551	8.48236	8.8953	23.6968	35.5286	29.1654	14.3839
EXOC4	6.18531	13.4969	18.0661	19.1873	8.04151	5.22313	14.7496
EXOC8	0.508828	0.546738	0.211051	1.76425	5.36309	6.30383	10.6961
EXOSC1	9.96438	20.9518	19.9926	26.9535	41.7731	44.2875	34.8872
EXOSC10	0.522314	0.806881	1.03659	11.1799	16.7308	25.2261	12.8661
EXOSC2	0.467205	1.18035	1.15207	1.59756	39.8975	41.0275	23.9813
EXOSC3	4.11353	1.40486	3.8062	9.89863	99.7735	67.2772	18.6092
EXOSC4	0.0659136	0.468705	0.558403	2.7966	36.8218	30.356	33.175
EXOSC5	28.8492	47.213	35.2031	22.0982	201.283	211.06	86.9137
EXOSC7	13.3725	47.6864	72.1815	48.0257	148.312	49.8432	109.716
EXOSC8	22.8936	4.61893	1.24854	1.56891	30.4554	28.4711	36.1054
EXOSC9	80.6534	28.8864	18.9011	17.8747	116.03	79.877	59.7957
EXTL3	8.75567	43.6368	33.2383	24.2496	10.6669	11.2874	2.76943
EYA3	6.79494	11.8471	12.0208	20.3361	27.1336	14.1705	4.40054
EZH2	9.38124	7.18334	4.32547	3.77114	11.856	17.9945	13.6318
F11R	5.7135	100.695	177.6	248.422	144.817	126.826	130.84
F2R	13.7256	14.7216	12.7044	10.7848	70.3222	26.3301	48.5213
FAAH	0	0.0473111	0.0347078	0.228781	6.90777	5.93664	27.2178
FABP3	299.389	287.118	247.349	279.479	823.799	476.656	8338.83
FABP5	4.2932	6.59981	7.2704	110.085	1236.57	1020.85	225.488
FADD	0.0197722	0.0836346	0.950228	1.34251	11.8144	8.8077	5.46542
FAF2	12.3402	14.0645	12.2986	14.3702	25.9839	24.5115	25.4344
FAHD1	6.53229	13.5667	17.1927	15.4649	10.4105	5.18419	0
FAM111A	0	0.0153596	0.0241577	3.09836	11.9281	13.1933	11.6815
FAM114A1	1.78144	15.7497	22.2616	21.996	9.42887	6.38608	0.837798
FAM114A2	2.30151	3.87725	3.80236	13.5178	71.4815	68.8281	84.2714
FAM118B	78.197	95.0685	85.8064	98.9839	162.165	268.411	535.395
FAM122A	0.00937603	0.0270586	0.0691706	2.39273	9.58364	12.6711	7.23225
FAM126A	1.76288	7.20899	7.08079	11.8312	18.5363	12.3597	11.9582
FAM151A	0	0.0468876	0.161486	4.95107	63.5235	110.119	275.148
FAM160A1	6.51114	19.9207	27.2004	18.0934	6.32625	3.03681	0.235985
FAM168B	14.8612	90.6018	60.908	40.8069	23.2105	25.5373	13.3767
FAM172A	27.9049	57.9006	53.3091	40.7565	59.5182	46.4514	35.0192
FAM173A	0	0.15255	0.421985	0.161316	5.0842	3.20815	23.7744
FAM192A	3.41872	26.9501	39.0818	35.3655	30.9235	30.5803	37.4721
FAM19A2	8.54154	70.4426	86.4252	73.6038	35.8749	18.4568	0.540886
FAM19A3	3.40421	8.02793	9.87575	8.29976	3.66409	1.51043	0.778424
FAM210A	11.3182	12.417	15.0721	55.0868	86.3223	80.4597	78.4774
FAM219B	1.15833	2.04296	1.43448	3.58872	8.38678	4.84361	10.7006
FAM32A	5.41721	6.24483	11.4723	79.9533	138.168	90.1279	43.2263
FAM3C	19.3781	6.20192	6.31988	9.28526	18.1207	23.6157	100.792
FAM3D	1.56585	5.87567	6.5121	7.70133	3.19657	1.16131	0.182577
FAM50A	0.0675206	2.01187	1.4714	1.2937	9.37725	15.1187	13.9077
FAM53C	19.2137	49.4531	66.4782	56.2607	39.6337	25.6502	12.2287
FAM76A	8.08387	1.01688	0.894449	6.06197	51.5929	42.094	124.075
FAM91A1	0.922077	0.37567	0.66282	1.99612	8.70969	9.00696	10.5647
FAM98A	13.8511	12.5921	8.67415	8.03285	52.8227	42.6898	32.2303
FANCC	4.31894	11.5219	12.188	12.3781	6.33137	3.94248	2.14564
FANCF	28.3454	128.433	151.319	65.4172	43.8335	64.3086	17.7039
FANK1	21.3394	143.531	171.124	207.354	135.747	45.7341	2.20493
FARSA	0.320519	3.46174	2.42133	1.93604	7.94835	9.27853	22.7997
FASTKD3	2.12338	1.4941	1.74121	4.43195	34.356	39.5387	38.6663
FASTKD5	1.81588	3.44781	1.26465	2.27134	5.0169	6.93922	10.0993
FAU	0.153948	0.247246	1.37924	36.2189	98.673	66.5986	28.6683
FBL	0.649773	0.926757	2.06789	36.1075	92.9589	124.445	36.4819
FBXL12	12.9989	69.0002	49.1674	31.8313	30.379	34.2417	23.8327
FBXO17	0.750964	9.50502	13.0861	6.44107	9.07806	3.25311	3.85554
FBXO22	3.3383	4.84355	5.93252	5.59453	6.69503	4.78758	11.1704
FBXO3	2.17026	5.55341	7.85995	8.94412	9.14153	4.83138	20.6163
FBXO45	5.55035	3.702	3.89562	6.71	24.8369	12.7149	8.98076
FBXO5	69.7732	90.1311	104.429	134.463	313.399	295.734	50.7864
FBXO7	2.82004	6.58859	5.78422	7.34091	5.29581	3.01577	14.8206
FBXO8	3.42755	6.66495	7.0184	21.2188	215.869	60.5754	42.1083
FBXW2	4.81486	24.1532	25.529	19.0899	22.5685	18.2149	6.15162
FBXW7	10.2371	18.176	10.1174	9.63795	58.9743	43.8987	65.8806
FBXW8	17.9018	136.681	177.238	173.861	50.9424	11.559	2.27268
FCF1	1.63681	2.5461	2.22422	5.45086	90.8676	97.7438	38.5058
FDPS	2.61883	5.77377	3.22077	8.7881	41.5748	24.9739	67.1599
FECH	2.79921	6.43754	7.29418	4.77119	16.637	17.714	24.0666
FEM1A	0.634558	3.97328	4.57228	10.6662	29.8576	27.7788	31.1288
FEN1	1.79001	3.43933	2.00368	1.57707	5.65481	10.2648	2.74222
FEZ2	180.15	284.232	313.577	409.068	332.559	134.731	20.2079
FGF13	0.0605723	0.236186	0.180279	0.758057	5.19066	6.78763	3.95914
FGFBP1	0.654991	4.17785	3.61559	7.56739	5.36072	3.13496	0.257477
FH	8.10434	36.2472	39.0867	68.9807	242.337	371.907	407.243
FIBP	0.916029	11.0829	13.6	11.2216	17.0788	13.2481	106.045
FIGNL1	4.21973	13.1287	13.3328	14.3773	14.0598	12.6655	12.9809
FIS1	0.973775	2.81295	1.68904	9.35781	40.325	16.0175	94.2665
FITM2	1.46168	4.6249	2.49404	1.59466	5.61717	9.53942	3.37209
FKBP15	0.779994	2.08297	2.57497	6.47396	15.5665	17.8809	19.2961
FKBP1A	57.0831	450.91	420.151	280.821	245.332	236.815	156.524
FKBP1B	2.85406	3.58645	4.26502	7.51297	18.0683	18.7781	25.6157
FKBP2	0.0602186	0.751431	1.80705	1.69368	22.6852	15.6651	121.909
FKBP3	5.93591	4.5832	9.9627	34.8615	136.312	63.3924	543.109
FKBP4	1.34784	5.76991	5.3472	9.78493	46.108	35.6169	29.675
FKBP6	161.296	664.119	733.723	704.698	320.294	438.215	6.14114
FKBPL	0.093501	1.86773	1.93446	4.31472	7.79163	3.54239	6.4025
FLAD1	0.228056	4.53633	3.30275	3.98623	11.797	9.88008	47.5675
FLNB	1.32318	12.4711	9.58735	7.32946	2.79879	2.8915	27.4839
FLOT1	7.39522	23.0573	27.4947	16.6429	8.95872	10.2542	13.333
FLOT2	0.128938	10.4973	13.0284	9.92745	4.60451	6.41944	11.3885
FMN1	4.3803	8.18719	9.20698	10.1137	5.54001	2.58775	0.49323
FMNL3	1.59264	9.43027	11.2654	9.20946	3.09846	1.14508	0.105177
FMR1NB	2.73105	2.05933	2.3145	5.25125	24.958	13.0799	26.1108
FNBP1	0.0482086	0.076828	0.103751	1.79272	28.0074	37.9471	18.0666
FNDC5	3.35119	2.40599	1.88557	2.49636	8.37607	8.30192	0.238235
FNTB	4.45992	13.2359	15.3277	13.2831	6.81375	5.22616	2.56217
FOLR1-2	0.0605994	0.44091	0.662968	16.5196	335.728	361.604	3131.42
FOS	0.0275183	0.257602	0.272479	36.2223	79.0448	177.54	53.7182
FOXG1	0.071527	0.198921	1.0155	7.42039	6.99499	14.7171	1.22963
FOXM1	0.138723	9.21886	11.3487	12.4211	12.2172	14.2289	7.81487
FOXN3	6.83307	53.3439	68.6455	62.4771	53.0009	23.6273	95.5993
FOXR1	153.433	786.548	1018.7	594.487	299.292	285.415	3.65832
FRAT2	0.849187	0.914884	2.13198	18.6962	32.3971	25.397	13.8768
FRG1	111.46	83.6876	67.9055	138.329	434.786	586.561	339.814
FRMD3	29.5323	57.8286	79.0369	114.262	47.5043	20.8195	6.57365
FRMD4A	0.986624	4.06088	5.69449	5.88665	3.23089	2.57533	1.94063
FRYL	5.86677	8.46314	9.15374	11.7791	17.1145	9.02087	18.8912
FRZB	8.60122	13.1493	13.3295	19.2122	6.79398	5.81677	0.103956
FSD1	0.539143	15.8684	20.024	16.1458	11.5127	3.51077	1.51928
FSIP1	5.05346	11.6538	13.7249	13.4332	6.28172	2.52408	0.573971
FST	5.58903	12.9686	13.8003	13.8948	5.96144	7.70065	10.0918
FSTL1	5.46867	9.22709	10.4128	15.4779	5.8082	3.79916	1.36467
FSTL4	2.19632	38.2405	31.6638	48.676	27.8342	8.02597	0.600255
FTH1	240.38	480.461	568.397	483.652	1132.23	1674.32	12673.9
FTL	2349.07	10331	15433.4	17515	11595	10090.3	8809.55
FTSJ1	1.96145	57.3747	78.762	67.0912	78.8074	93.5488	45.6498
FTSJ3	1.92346	9.82664	5.72375	4.04236	16.6032	13.7082	9.03083
FUBP1	6.67095	6.30672	6.65966	16.5243	67.9931	45.5264	34.3881
FUCA1	47.9802	66.5392	80.5388	108.318	72.9443	72.2457	198.499
FUCA2	1.57782	4.51476	7.35558	5.49436	4.47627	4.65843	17.5305
FUS	0.238608	0.366626	0.235038	7.463	9.38785	8.39246	4.37027
FUT8	2.69862	3.92221	4.89857	5.7608	2.79062	1.6861	5.78268
FUT9	0.592679	0.147577	0.502829	4.42483	11.9196	4.30171	0.0291235
FXN	2.21551	5.60918	4.18544	3.36579	11.8526	9.77527	10.3514
FXR2	0.136144	1.37012	1.40136	2.28209	6.811	7.29129	5.67371
FXYD6	24.7307	1820.79	2057.07	1560.83	808.019	400.796	26.3167
FYB	0.142389	4.48172	6.82801	5.95037	5.11073	10.5756	15.632
FYTTD1	18.1125	12.6631	14.596	22.169	29.2813	19.2133	22.8322
FZD4	0.551121	3.26699	3.10461	5.40688	27.1728	10.2338	90.2642
FZD7	0.446009	0.402909	1.18193	5.08692	2.26828	4.56658	0.605545
G2E3	5.34627	5.11479	5.19406	11.9862	24.683	22.1754	16.9392
G3BP1	1.70694	1.32956	1.20968	14.198	77.8907	66.2804	62.7969
G3BP2	4.43619	12.4053	12.1383	16.0081	30.9758	29.712	52.3103
GAA	4.06067	30.4123	33.7293	13.0488	4.95799	4.94177	0.726009
GABARAP	20.9081	15.4202	4.74663	6.441	11.8429	19.7744	22.749
GABARAPL2	346.651	729.727	1002.42	867.618	1707.56	1709.62	1333.43
GABPA	22.8059	22.569	20.3983	32.1541	45.2094	56.4932	30.5674
GABPB1	14.8449	14.8306	16.3878	20.6298	30.849	40.9218	12.991
GABRA1	0.420563	0.267174	0.880506	6.52315	5.35427	3.76655	0.0642894
GABRA5	0.0943147	0.167603	0.288185	2.2082	7.18594	8.22605	1.67347
GABRR1	95.3335	252.754	200.63	233.643	132.645	71.9437	2.79157
GADD45A	1.54939	1.85639	2.85846	10.347	10.1448	65.2009	166.793
GADD45B	0	0.0689152	1.4492	9.85817	17.3621	52.8069	7.95205
GADD45GIP1	1.8616	4.53507	3.52832	1.2064	19.0901	19.4734	20.3583
GALE	0.100938	0.613366	0.685047	0.467086	8.51012	6.73925	26.9017
GALM	0.562702	1.38364	1.45514	3.53668	28.4159	71.1666	268.848
GALNT13	8.6414	35.5914	48.8158	54.5993	28.3909	10.5042	0.333957
GALNT3	1.15108	2.08379	2.03785	2.39761	7.11202	4.38763	27.9263
GALNTL6	3.15658	13.5039	14.4667	13.9881	4.34211	2.68898	0.0726163
GALP	0.0531203	0.0366757	0	5.90687	83.8836	20.0142	4.54136
GALT	0.11095	0.431741	0.0921491	1.51687	10.5323	8.48067	23.3139
GAP43	4.86194	15.7463	16.112	10.7657	9.46581	7.34228	1.018
GAPDH	4.59699	19.4262	26.4751	47.315	43.0381	92.0087	188.043
GAR1	6.74702	12.9671	9.85249	3.47323	34.6055	40.798	14.9083
GATA4	8.64108	39.4207	37.0086	30.3783	10.0509	8.07795	4.65193
GATAD2A	2.6298	9.6852	9.6481	10.4529	9.9964	16.9336	17.8389
GATAD2B	10.4546	68.3322	55.8091	70.9388	47.0002	20.9566	11.3267
GATB	0.987731	8.27146	10.4133	6.96955	4.64509	3.98128	19.1183
GATC	18.4592	3.32045	1.61	1.677	7.98323	4.2145	8.37926
GCC2	8.37848	8.78512	6.92384	8.6699	17.5945	14.7745	11.0964
GCG	15.1981	29.6372	34.3285	34.2688	25.6289	7.88863	0
GCH1	3.75562	7.78613	3.73095	3.85957	17.6888	16.4082	3.39933
GCNT3	5.54517	15.7394	18.1927	24.2077	13.4909	2.29768	47.7874
GCSH	12.7339	3.83381	2.18144	4.02929	109.209	80.1014	676.134
GDE1	0.0711952	0.0359105	0.132012	2.58739	14.0769	15.4968	21.3697
GDF3	1.01722	1.74241	3.36403	21.4366	55.2373	96.138	124.122
GDF9	134.397	515.942	633.57	1194.8	644.701	450.013	9.77985
GDI1	0.83768	4.31284	3.56902	5.18676	2.39435	2.47232	3.0252
GDNF	0.278687	0.845087	0.731291	0.967851	6.76259	7.55832	0.174841
GDPD1	4.12068	2.19719	1.09698	1.19425	5.83918	8.5009	1.12579
GDPGP1	0.180823	1.24051	1.80818	4.13865	25.9169	17.2871	4.53604
GEMIN2	2.27678	0.991992	1.3484	1.76613	29.8953	12.0433	54.9615
GEMIN5	1.15962	3.36808	3.25688	5.50857	14.3817	18.4116	7.5339
GEMIN7	0.0523592	0.0170751	0.384928	1.28604	6.61543	6.58726	7.52284
GFM2	5.73723	7.65234	7.98529	14.0479	26.5941	10.5174	13.5386
GGA2	1.19425	6.40675	8.44922	7.28206	7.04016	6.68756	42.8942
GGH	3.75615	8.16032	9.89662	8.39271	8.76322	8.56413	63.8512
GGPS1	25.8009	74.8195	103.372	131.218	128.734	46.2408	98.7897
GGT6	2.57305	56.0174	57.7989	52.6347	18.9959	6.71212	1.13979
GHITM	2.42579	2.24843	1.17487	13.9314	71.636	63.787	314.457
GID8	3.55015	17.148	19.7926	12.5667	10.6454	11.9847	16.5812
GIGYF2	2.69558	6.00543	5.43983	5.42211	9.9336	9.66513	10.3398
GIMAP7	25.3216	47.7447	66.9505	71.2746	36.6774	20.0051	3.64234
GINS1	2.09588	5.14469	3.16386	2.94506	17.1017	16.7447	31.0943
GINS2	1.88402	27.6601	24.3997	9.71727	20.8567	17.7288	14.5998
GINS3	10.7086	37.5948	38.1509	24.2926	48.4108	40.5436	16.4496
GINS4	16.2	115.96	65.554	31.4737	65.2422	62.2287	15.2559
GJA10	4.78581	25.5941	22.727	26.5787	9.83846	5.47932	0.176725
GJB3	0	0.0436909	0	0.962126	14.2	22.5535	42.6077
GJB5	0	0.0238653	0.0446382	0.431432	12.881	37.5615	75.6201
GK	7.94581	11.161	10.5239	13.4042	55.8527	26.377	57.6369
GLA	47.3546	117.529	145.634	198.116	223.402	221.689	414.557
GLCE	15.9951	17.3472	8.74341	13.956	18.3841	13.6075	23.3669
GLG1	1.46566	1.7966	1.59773	2.61287	6.0979	5.82246	42.5348
GLIPR2	1.39915	3.25318	2.62531	9.15733	33.2473	22.33	182.419
GLIS3	2.05403	8.37262	9.80273	9.55844	2.63383	1.81902	0.0379629
GLMP	0.174675	3.61151	4.68243	5.38381	5.71037	5.54207	155.597
GLO1	60.3207	265.936	295.272	230.999	251.403	134.468	183.572
GLP2R	0.744327	12.3432	10.0899	8.42295	8.31634	4.28728	1.436
GLRX2	79.2595	1.50888	0.513163	0.427666	5.13943	10.4134	19.9535
GLRX3	2.40589	6.38226	4.0041	10.1443	41.6852	44.384	136.249
GLS2	11.7295	339.362	295.861	255.623	72.23	101.892	1.40332
GLUL	19.2572	79.0064	61.2331	69.8671	152.536	123.176	331.965
GLYCTK	0.21887	3.61851	4.86923	2.54086	7.42135	6.94586	8.25789
GLYR1	3.17251	80.9358	65.0796	31.1852	67.6044	50.3777	279.52
GM2A	0.902956	5.70846	6.3337	22.5244	58.3862	78.9711	1518.26
GMEB1	0.75749	2.02325	1.76724	1.93137	5.98044	3.9533	7.81779
GMPPB	0.224285	0.808128	1.92948	19.1452	76.0872	26.2626	17.8528
GNAI3	25.4073	78.8564	83.2084	104.544	153.956	183.898	70.7499
GNAO1	2.14517	24.1983	27.7171	22.1179	9.9274	5.24393	1.08812
GNAZ	0.0959587	0.187111	0.568807	1.85084	5.24404	4.1896	2.98798
GNB1L	0.0193632	0.399205	0.959717	0.801416	8.14107	13.9455	14.9941
GNB2	5.39352	10.4999	12.3517	14.5722	6.8278	13.1366	17.9074
GNG12	10.4185	17.0087	18.3694	22.0922	14.5907	14.3777	72.0834
GNG2	8.65521	11.7265	14.766	17.5266	13.8389	6.40532	3.04647
GNG5	292.22	42.1949	10.8498	11.665	25.6089	34.2805	16.9758
GNL2	14.9482	9.46762	2.64597	17.9531	94.0158	133.705	140.763
GNL3	4.10824	1.33531	1.22769	3.63861	52.9639	64.4269	48.2153
GNL3L	0.51955	3.20318	4.20339	7.45197	52.5608	54.9422	164.878
GNMT	0.0240262	0	0.0807746	0.640171	27.0927	9.55187	3.28419
GNPAT	12.9879	32.0323	33.3664	37.6148	17.2741	21.8243	30.9765
GNPTG	14.5532	8.7432	5.15441	3.16353	35.4737	46.7133	60.6463
GOLGA7	96.0737	353.644	363.943	383.122	266.32	136.74	248.763
GOLPH3L	1.52948	18.4502	21.6954	22.4595	8.88952	6.9264	11.3287
GON7	48.9904	1.54255	0.968495	3.98817	20.5614	25.184	38.8753
GOSR2	14.9405	42.7098	34.7028	30.1183	15.7619	15.5008	10.3317
GOT1	4.62123	14.1155	14.2809	25.5036	78.2872	114.248	279.621
GOT2	25.789	117.603	113.079	123.87	93.0466	124.89	125.71
GPALPP1	13.8765	31.3931	48.49	56.3531	139.356	134.95	69.0426
GPANK1	1.91622	30.3433	29.7363	88.7061	93.6797	59.3482	11.4672
GPATCH1	12.8125	54.4098	41.4573	32.7745	22.0122	22.738	18.9926
GPATCH2L	1.25197	3.95381	4.33007	6.43112	11.3283	11.1422	11.9243
GPATCH4	3.98939	25.6421	31.7399	34.1055	89.2555	82.5052	68.7059
GPATCH8	7.82409	20.4096	16.1521	15.4123	17.3971	15.3916	7.2633
GPBP1	44.9407	32.5934	40.9511	101.182	98.0079	120.318	112.012
GPBP1L1	4.80137	15.7074	25.5494	42.8917	43.6804	34.1299	48.7146
GPD1L	18.7775	29.2654	24.904	30.297	75.347	98.713	4209.45
GPD2	1.28275	0.59212	0.759656	2.65911	15.173	8.68497	40.2576
GPKOW	0.45661	2.78584	3.25096	2.71081	17.789	7.38406	28.5392
GPN3	8.16713	18.2916	38.5729	104.885	249.269	163.375	163.852
GPNMB	51.9408	206.224	273.745	399.222	129.237	48.5622	7.91329
GPR142	0	0	0	0.422123	9.66863	7.79805	0.740682
GPR151	4.85456	89.3247	80.3015	61.3295	26.6171	13.0389	0.474728
GPR161	4.36146	24.6579	26.4149	23.6557	16.0413	17.1296	0.163948
GPR19	2.89867	3.91108	4.17722	7.93011	4.96427	5.82424	3.95769
GPR32	1.12475	12.7336	14.6533	16.7495	5.51996	2.94681	0.0121137
GPR39	1.72205	13.5738	13.4526	14.5857	6.53225	4.71821	1.78674
GPR4	1.65094	13.6688	15.5604	18.4398	10.5165	7.73528	2.30301
GPRC5C	0	0.0117929	0.03245	0.36046	9.36463	14.4194	15.302
GPS2	2.52439	30.8558	25.845	19.1303	32.2921	11.1259	31.7753
GPX3	4.09671	20.713	28.8385	42.8403	17.6758	22.4258	10.6459
GPX4	0.858848	1.01198	1.13568	1.88874	6.98673	9.16825	61.7087
GRAMD2A	28.3734	95.2186	113.019	139.287	70.7284	54.1511	3.17198
GRB2	1.17694	0.31637	1.82359	9.84177	23.5144	35.5399	23.0985
GRID2	2.0999	5.02788	6.1578	6.02427	2.93643	0.765931	0.028787
GRIPAP1	0.206025	4.74648	6.03567	5.4347	11.2412	8.79477	21.8467
GRK7	2.70701	13.863	12.617	9.67447	5.42958	5.47871	0.310122
GRM5	2.03789	7.52878	7.77188	10.0189	4.33814	2.75422	0.502907
GRM7	3.35282	4.92315	5.16983	7.69703	3.35712	0.71874	0.0416665
GRPEL1	77.2823	281.796	188.97	105.867	166.021	240.361	99.5717
GRWD1	0.253944	1.4371	2.70766	18.6116	54.742	60.6712	22.278
GSG2	0.412032	1.27152	1.39031	2.75627	6.1163	3.82645	2.47784
GSK3B	2.11735	5.97045	4.95321	9.51629	17.1363	23.8033	15.3332
GSPT1	4.09892	12.7533	15.148	44.0748	119.628	123.251	104.112
GSTA4	13.6014	20.9381	18.0151	20.8459	28.2018	46.8111	28.6939
GTF2E1	169.709	353.293	343.372	346.092	182.834	158.706	9.48085
GTF2E2	14.2082	64.1751	91.5112	38.4983	48.5106	67.3485	50.8286
GTF2F1	2.1824	7.30866	9.6498	59.5889	81.1803	109.341	43.0867
GTF2H2	8.42208	3.36817	3.5567	5.82918	33.7177	12.6601	60.1121
GTF2H3	1.3449	1.87419	1.30699	8.73551	66.8164	37.6571	51.659
GTF2H4	0.888054	2.73552	3.50445	1.75757	14.6251	10.3311	8.1419
GTF2H5	58.4327	2.9985	0.985437	3.03842	18.3574	39.4977	22.3427
GTF3A	0.131353	0.610063	0.340995	1.02074	14.1347	13.8524	13.7423
GTF3C2	7.18755	32.6414	37.007	32.4749	29.8205	26.2977	17.5464
GTF3C6	8.95196	41.7053	32.9917	50.7961	75.5307	40.8998	132.505
GTPBP10	14.9576	17.1728	19.2298	28.6549	118.756	78.9198	78.8373
GTPBP4	2.37705	17.2003	15.3113	15.6391	75.276	111.918	28.6003
GTPBP8	0.654584	3.43725	3.0729	7.3968	27.0349	15.1007	31.7304
GUK1	14.3997	52.9025	72.8807	93.0693	45.7278	26.6977	15.0661
GZMA	61.3428	156.044	191.807	189.637	54.0101	44.1678	3.65654
H1FOO	1251.62	6886.3	7421.92	3755.4	2180.47	3558.08	8.86288
H2AFY	3.17067	18.7857	45.09	59.3352	24.8031	16.8019	48.4854
H2AFZ	223.761	133.627	218.312	949.885	3454.02	3026.32	1672.67
H3F3A	68.6232	7.59833	6.94454	17.9819	48.7105	119.619	66.4804
HACD3	23.3519	35.3073	42.2329	49.3342	24.738	12.9183	24.2705
HADH	33.5089	170.381	180.776	178.228	50.3737	46.11	208.03
HADHA	5.13656	14.2743	13.2971	15.675	13.6507	10.2635	42.5048
HADHB	30.9398	108.786	114.065	106.653	71.4925	74.2108	267.836
HARBI1	0.589196	11.2952	15.6952	19.0458	12.4951	5.29169	9.60923
HARS	0.797872	1.8104	0.648712	3.80951	46.6334	38.7542	81.6091
HAT1	117.196	31.8697	24.0667	29.7075	83.8351	108.71	88.1623
HAUS1	54.5607	86.8236	94.0258	110.377	127.194	67.962	128.976
HAUS2	9.16147	11.508	12.3296	12.1947	53.4447	59.6704	125.944
HAUS6	1.09901	0.849305	0.910802	1.05486	7.94458	2.63614	4.67219
HAUS7	0.0421733	0.20993	0.196196	0.780965	7.41826	6.01391	18.8951
HAVCR1	0.699645	5.5995	7.53766	30.0562	321.595	92.0829	1418.81
HBEGF	23.6607	164.459	197.767	179.757	106.62	97.7708	17.7503
HBP1	38.6645	48.4233	48.8606	82.6111	172.442	179.486	108.044
HBS1L	17.7567	15.3529	14.7742	52.0678	109.164	139.753	91.651
HCK	7.77595	24.1978	32.4142	29.1544	12.9965	31.2541	0.996971
HDAC1	5.35455	19.9644	21.8262	27.477	22.389	26.5992	119.63
HDAC2	11.3831	20.2536	23.5935	41.5139	105.157	118.491	114.478
HDAC8	1.27982	7.1019	9.70475	4.77965	12.9311	17.6415	30.5005
HDDC2	19.8013	15.0363	19.8357	42.0242	128.65	57.2218	79.3341
HDGFL2	1.96764	6.11481	6.30281	3.04886	7.80112	6.30341	4.93203
HDHD3	0.0186643	0.415303	0.437235	4.02774	16.2169	8.97941	21.7202
HEATR3	0.419711	0.868269	0.610188	1.7669	14.4798	14.1123	88.086
HEBP1	0.0532488	0.0880312	0.268158	2.77262	7.77069	6.14301	2358.3
HELZ2	0	0.00500748	0.0875832	1.84844	5.88771	6.06856	0.198367
HENMT1	384.356	73.0108	33.5602	62.1263	135.139	138.782	64.3483
HERC3	5.17027	16.7416	17.5452	20.0166	6.86755	4.91069	9.20094
HES6	1.82029	3.45723	2.34042	1.94426	8.98887	11.3402	1.02394
HEY1	27.157	34.1297	32.9016	22.373	58.4213	47.6431	1.24936
HHLA2	3.04927	4.76144	4.35187	6.91319	1.87358	1.50506	0.0923402
HIF1AN	4.13029	16.4901	24.4011	21.3941	26.6763	21.5146	22.18
HILPDA	99.8918	1501.5	2098.87	1386.2	880.547	2685.62	123.304
HINFP	0.369032	2.09103	1.82247	4.13459	23.8523	26.6843	8.55692
HINT1	11.4781	1.12567	0.895663	1.79222	6.76621	13.375	96.4305
HINT3	4.51615	7.13567	6.16637	3.5612	9.47682	6.47225	7.45948
HIPK3	1.77105	1.30748	1.46969	6.70707	15.1045	15.448	5.61589
HIRIP3	7.09669	68.1108	66.4525	43.2315	40.6971	26.0102	10.4978
HK2	0.158637	1.0741	1.16829	6.52519	7.12672	15.7034	3.79382
HLCS	0.866693	2.35521	3.3197	7.87969	15.6402	21.3239	5.94327
HMBS	0.0163669	0.250277	0.14219	1.34898	12.3855	14.7451	149.079
HMG20B	3.46894	34.9826	55.7546	62.5823	35.8072	23.1362	34.9812
HMGA1	0.66321	5.09383	6.28445	4.47233	10.6119	14.3744	25.9495
HMGB2	329.959	94.164	93.1923	135.469	189.258	276.654	214.643
HMGB3	49.1229	593.511	335.884	206.389	114.983	288.993	131.052
HMGCL	2.72673	22.0254	25.5057	20.5599	8.11691	11.863	129.827
HMGCS1	6.87971	8.94847	9.1945	13.5335	16.7139	10.4326	18.9885
HMGN5	3.86683	11.3577	9.62134	5.36626	7.98834	5.24909	2.85592
HMMR	265.99	514.497	635.154	717.102	356.361	226.933	84.8007
HMOX1	0	0.589586	0.35837	2.87177	101.74	186.829	142.534
HNF1B	1.27404	27.9052	39.364	52.7034	21.1714	5.70434	1.35597
HNRNPA1	228.362	770.422	1366.32	2535.26	3539.04	2806.03	1265.08
HNRNPA2B1	30.4014	80.117	114.173	602.261	954.578	790.58	647.487
HNRNPA3	25.0547	33.0537	41.5911	54.8562	62.549	35.8017	101.39
HNRNPAB	18.0636	3.99579	2.89992	5.09314	15.5929	14.535	16.1834
HNRNPC	63.988	77.7819	69.7341	110.117	200.003	325.565	274.127
HNRNPD	31.1789	77.5004	51.4511	30.4821	67.5918	79.4057	85.1166
HNRNPDL	53.0691	35.7868	21.8451	36.6698	79.2156	71.902	47.0657
HNRNPF	81.6482	213.819	254.42	384.785	484.732	455.193	552.222
HNRNPH1	40.8439	40.7094	43.0761	65.7333	199.063	232.322	87.798
HNRNPH2	6.12891	10.1847	9.59375	17.6501	30.8814	37.9185	212.567
HNRNPH3	32.933	37.1041	42.3172	45.4875	83.035	87.3482	52.092
HNRNPK	1.83999	28.7776	50.5539	191.318	214.816	281.116	383.903
HNRNPM	13.0898	31.0584	31.6848	41.84	129.766	237.77	180.735
HNRNPR	21.4781	40.3933	38.0567	41.8961	77.5751	56.8172	216.549
HP1BP3	18.9188	38.9382	44.5936	71.8134	54.5885	20.1715	42.2122
HPCA	0.0183258	0.238559	0.587721	6.66633	77.9973	61.3649	4.94481
HPRT1	48.4379	52.8505	90.2716	41.3443	162.516	162.09	315.827
HPS5	5.71863	9.05377	9.76874	12.8884	4.77593	2.82943	11.0618
HSBP1	29.5153	40.9995	42.3023	59.534	207.162	111.436	696.215
HSD17B10	5.80861	12.794	18.4182	16.4861	32.1708	33.2415	361.957
HSD17B14	0.0550726	0.471815	0.546551	2.02464	7.01658	6.27985	165.524
HSD17B4	9.73507	34.6268	45.2161	51.6616	29.9533	15.639	73.2706
HSD17B7	62.8608	112.927	92.2781	136.944	97.0141	42.3712	16.8821
HSDL2	19.4542	61.1108	57.9947	47.6363	45.8577	33.1369	162.843
HSF2	0.637886	0.64424	0.453452	1.17179	5.56315	10.5882	16.3721
HSH2D	0.694389	2.24856	1.63478	5.85937	52.4199	37.5737	4.07759
HSP70.2	7.06792	10.6212	5.20038	7.4551	11.0507	18.691	8.35608
HSPA12A	9.00672	24.7518	19.8432	19.5975	11.0669	4.30971	0.660834
HSPA2	1.25187	3.83772	3.83595	10.0992	7.88297	5.60753	3.19423
HSPA4	4.39931	2.4564	2.14854	4.74576	12.1867	12.9482	62.1254
HSPA5	12.5538	36.4754	48.0791	164.344	261.851	277.001	292.071
HSPA8	112.351	68.1996	38.6343	284.203	815.315	977.182	1970.07
HSPA9	76.8234	176.1	171.857	180.463	204.405	321.326	440.078
HSPB11	11.8697	1.14738	0.738649	2.4969	8.5837	7.59381	12.6398
HSPB6	0.356165	5.15827	6.25683	5.11712	5.63705	1.79659	1.81265
HSPB8	1.26282	3.33909	2.24405	5.46246	18.7409	24.3467	9.41486
HSPBP1	0.349741	3.73212	5.64418	6.46755	26.481	54.2785	7.8805
HSPD1	18.5861	50.6282	59.4073	74.817	347.047	518.658	1297.33
HTR1D	30.4881	73.1386	76.2461	88.1422	31.3126	28.6505	4.11048
HTR1F	0.0365395	0	0.339859	5.43163	14.1774	10.8475	1.64789
HUS1	157.615	260.421	357.008	341.015	351.051	284.431	253.777
HVCN1	9.72976	21.1235	19.7563	22.8851	9.32535	9.90784	0.181182
HYAL3	0	0.461565	1.08435	0.903574	11.1636	13.2303	12.8352
HYKK	1.5092	3.87149	6.71848	6.86126	2.24578	0.915668	2.65903
IAH1	10.2262	5.74446	5.98287	11.9824	44.8712	40.7244	41.0186
IAPP	0	0	0	1.47573	5.90365	1.59365	0.0151497
IARS	2.17453	1.79171	1.81189	3.36551	14.9173	9.8341	43.7758
ICA1	34.2292	101.255	120.832	71.1475	26.8066	39.8166	7.19631
ID1	2.04255	0.352002	1.6949	1.68187	10.4681	67.3427	2.31598
ID2	0.0625047	0.0913702	2.12594	6.90518	1.99624	1.22204	1.8372
IDH2	1.19083	2.28755	2.5789	4.14272	9.31907	17.2555	22.8503
IDH3A	30.3501	40.5619	41.5424	45.1126	88.0982	90.1506	304.42
IDH3B	0.702395	0.639773	0.249304	2.93228	20.1427	26.9886	38.5625
IDH3G	0.258914	0.292889	0.0377624	0.164716	5.8746	9.57026	11.6225
IER2	0.199514	2.27288	4.1239	2.60609	20.5393	31.2796	15.7736
IFI30	0.281881	0.0900057	0.0319505	2.62231	18.4396	13.5049	4.02119
IFI6	0	0	0.224404	0.778998	23.2983	17.5804	1.95678
IFNAR1	5.17984	18.6715	20.0593	22.4411	14.2164	8.70594	7.72767
IFNGR1	1.69735	1.98338	2.08783	6.99391	14.1956	8.25217	0.501428
IFRD1	11.2641	22.8775	28.136	70.6631	120.275	198.835	238.847
IFT22	3.38211	8.78302	15.6999	14.6995	4.99852	1.73433	3.4478
IFT57	7.0977	4.89168	3.21292	4.039	6.68296	12.7236	3.32865
IGF2BP1	0	0.0330275	0.148335	5.29426	30.1966	46.2708	33.1978
IGF2BP3	152.928	593.736	540.669	555.155	447.87	154.184	22.8177
IGHMBP2	0.221587	0.441069	0.430692	2.7392	8.63556	6.31656	2.27389
IGSF3	0.0943003	0.565449	0.451146	5.42661	29.7001	13.3594	8.35295
IK	71.0161	57.5114	51.8486	93.6844	173.501	188.739	179.379
IKBKB	0.0557058	0.239732	0.163629	1.397	5.90709	5.35554	7.2839
IKZF5	3.6001	7.9612	9.05444	17.3337	19.1444	12.173	7.77495
IL10	0.381959	0.419241	0.726795	0.437289	5.49742	5.44216	0.329265
IL10RB	1.02453	2.23217	2.77877	0.135318	5.34656	3.49905	6.54554
IL17RD	2.3176	1.49415	0.775176	2.24043	6.02933	4.98726	1.3467
IL20	0	0	0	0	14.3901	8.14872	2.25475
IL23A	1.31041	2.88745	2.07434	5.99658	28.2462	35.977	0.161894
IL2RA	3.90929	16.1759	19.5535	22.1002	6.19416	5.60818	0.455011
IL2RG	0.30492	2.36398	3.00476	28.8675	28.6001	44.7357	2.67845
IL34	0.367838	0.70492	0.845975	2.21511	9.11906	5.05936	2.69757
ILF2	3.70315	12.6791	26.6349	349.007	837.317	951.06	634.157
ILF3	3.04994	24.8445	31.5516	101.577	177.273	105.926	42.4065
ILK	0.237947	0.806944	0.647389	0.921451	8.1769	9.32427	37.2071
IMMP2L	11.1793	12.4447	20.6079	26.5991	18.8777	7.64491	39.8739
IMMT	5.64033	27.0698	24.8147	31.149	49.414	32.7851	143.261
IMP3	16.5289	12.492	10.8135	25.2067	49.0914	58.5046	20.6125
IMP4	0.943525	1.17974	0.676493	5.1783	32.9488	43.3875	28.833
IMPACT	1.32939	2.00227	1.93038	1.80962	6.49224	12.4836	48.3979
IMPAD1	4.66766	4.09511	3.15616	8.71267	6.62876	6.97691	5.20649
IMPDH1	0.0805533	0.578744	0.251697	1.78629	10.3563	10.9133	1.75471
INCENP	2.44725	6.91513	4.81156	4.14363	20.7712	22.3139	34.4811
ING3	95.4111	317.322	365.542	499.952	325.72	221.288	71.8085
ING4	3.07597	25.1044	20.1032	10.7914	22.7039	21.4391	29.8177
INHBA	6.48216	21.2909	25.5038	22.5102	19.877	9.4106	4.65151
INIP	47.3502	242.573	368.97	382.828	404.107	238.841	63.5895
INO80B	0.0882977	0.418341	0.826597	0.89403	10.5065	7.51164	5.75747
INO80C	1.44024	5.80162	10.8437	39.7811	43.8603	85.2389	52.3747
INO80D	2.28824	4.72493	5.02355	8.44719	7.72698	4.20095	2.29711
INPP5B	3.46785	14.3707	17.3451	20.265	6.53054	4.0138	18.6562
INPP5K	0.0699536	0.0883742	0.338251	4.16083	14.4668	10.455	7.00172
INSC	2.78332	9.19573	12.5079	8.99299	4.12297	4.50037	0.927225
INSIG2-2	38.678	21.7544	27.1921	34.043	75.5974	42.3516	33.1135
INTS12	4.18895	2.80522	1.94442	2.46147	7.98157	8.51113	2.69838
INTS13	17.7535	31.3365	31.7775	42.7046	52.7761	38.2887	33.1624
INTS3	6.10463	21.3845	14.9166	13.5075	5.96058	4.86305	2.94626
INTS4	7.74327	20.9782	24.3485	39.3169	18.303	7.17965	7.38505
INTS6	3.09027	2.90529	3.25995	6.24074	5.7675	11.8506	7.48296
INTS6L	0	0.00792881	0.214847	3.5509	10.0483	13.3899	1.3431
INTS7	2.64083	4.00444	3.74828	5.22473	11.9998	10.1966	12.1484
IP6K2	7.82454	5.18918	3.70184	4.29843	18.8722	20.1839	9.57805
IPMK	2.03632	1.00511	0.909341	1.54934	6.70392	4.89171	18.9274
IPO11	7.41808	2.81485	3.54007	7.04197	10.7033	11.6246	6.15371
IPO4	0.533561	0.0198719	0.138477	1.25378	5.40155	9.31235	6.96474
IPO5	1.33357	2.07433	2.71493	11.1896	45.9568	46.1029	177.428
IPO9	0.147566	1.77681	1.93202	2.90406	5.82381	13.9109	10.9409
IPPK	1.01603	2.51269	3.1586	4.72464	14.0623	19.2936	7.30528
IQGAP3	2.44127	8.49917	6.86474	6.08798	2.09257	2.0168	2.20102
IRAK3	5.31645	22.3426	29.6276	40.1675	19.1608	6.49363	0.466631
IRF1	6.12694	4.68249	3.72287	6.70053	10.675	9.82883	0.613969
IRF9	0.360005	0.942393	0.823155	2.09157	5.14941	3.49273	5.2605
IRGQ	0.136052	0.338818	0.276961	1.3093	8.36403	7.4751	2.33293
ISCA2	1.67541	4.12937	4.10788	4.09258	5.63322	2.94916	8.43539
ISG15	0	0.0854215	1.10034	2.65959	27.8424	113.769	5.43827
ISG20L2	0.0215376	0.0476574	0.0803044	3.13046	28.0477	26.4652	19.1548
IST1	12.7636	20.4231	18.628	16.6443	31.5868	27.0617	81.0282
ITGB1	6.6852	1.1486	1.45642	2.30863	6.23238	10.6637	71.9599
ITGB1BP1	3.40159	8.21626	8.91258	21.7882	70.3023	52.597	38.6375
ITM2A	0	0.113031	0.102945	1.42101	23.5394	28.0052	6.69931
ITM2B	15.1668	25.2639	33.7912	30.165	98.5437	123.074	337.224
ITPK1	0.20241	6.54471	6.98485	3.74803	6.43637	6.34311	18.0828
ITSN1	0.364227	2.97067	4.14013	6.92703	5.83435	2.47657	16.8477
ITSN2	43.8644	84.2108	99.3498	111.149	56.7011	41.8076	8.5282
IVNS1ABP	7.9123	15.2807	20.7652	40.238	39.628	19.3811	4.02514
IWS1	21.5842	228.109	246.214	199.88	139.833	95.8738	51.9782
JAKMIP2	3.06883	20.9739	24.9199	30.0321	19.3997	6.82226	0.0433146
JAM3	4.0326	8.61565	9.25084	13.1031	4.59834	3.35638	1.0437
JAZF1	8.16419	37.2764	56.1241	55.6289	31.5179	6.19661	0.757327
JCHAIN	2.38166	14.5399	26.1511	36.9695	20.5573	5.09646	3.22045
JOSD1	2.268	5.37779	6.57171	11.8952	6.4436	13.7482	22.1348
JOSD2	0.776518	1.06257	1.28621	2.95097	5.77703	5.52773	6.51923
JPH1	20.0135	59.6504	62.7875	48.3948	34.6817	22.6353	3.88513
JPT1	57.2078	45.3763	50.7228	94.2937	342.582	488.507	308.108
KALRN	1.9234	9.72231	8.70455	6.65194	4.67068	1.42506	0.143516
KANSL1	2.73038	7.16224	8.38372	7.57412	5.29184	3.9406	5.00267
KANSL2	31.8459	57.8968	65.0055	91.2933	152.203	189.396	63.3963
KARS	68.7528	307.91	242.307	176.994	217.664	348.451	716.925
KAT14	0.252209	1.34728	1.72157	4.82084	13.9789	5.02408	8.73406
KAT5	0.159317	0.605978	0.585545	1.4743	5.31658	3.81676	2.89263
KAT6B	9.51195	31.0065	27.6134	23.2279	48.9072	28.1568	27.4885
KAT7	3.03422	10.1806	8.6936	17.4041	28.36	29.9473	16.4995
KATNAL1	3.13176	11.6031	16.4441	20.1242	8.65622	2.75004	3.74548
KATNBL1	11.0252	24.6414	38.1626	48.3438	61.0264	29.7672	27.9496
KBTBD2	7.96593	3.26689	3.36344	10.9509	13.7591	10.9162	4.4691
KBTBD4	23.4497	65.303	66.7368	59.1054	78.5326	83.7628	16.7044
KCNH1	2.28054	8.43932	8.74844	6.89695	3.50854	2.60524	0.330211
KCNK18	0.746926	8.28537	11.8727	14.91	5.35672	0.696846	0.0453696
KCNK2	22.228	52.5741	60.7952	63.4094	44.5479	17.0362	0.194409
KCNMA1	0.966602	7.92994	11.3337	13.0042	5.70081	0.851608	0.156293
KCNN2	2.2808	3.81852	5.31525	5.19018	2.47897	0.726105	0.187043
KCNN3	2.2313	26.1634	29.8103	31.8902	18.6865	6.921	0.578574
KCNS3	0.0221944	0.0127021	0.0222206	0.733178	5.46058	3.93923	0.854931
KCTD1	0	0.00700735	0.0164999	0.800495	9.9324	12.0762	13.9296
KCTD2	5.51627	16.9129	15.9412	14.1569	7.8926	5.17382	3.71384
KCTD20	0.840265	0.581139	0.722875	2.28921	8.41478	4.90354	8.84587
KCTD6	0.76077	0.185709	1.20673	5.27523	3.65473	3.81711	7.76612
KCTD9	117.734	325.963	379.48	434.118	211.118	120.068	40.1692
KDELC1	8.40266	14.937	16.5292	20.1277	13.1372	9.97954	25.236
KDELR1	0.90104	28.5383	34.7365	36.906	16.8316	23.6924	61.0343
KDELR2	175.668	488.997	506.503	368.831	352.845	181.609	163.514
KDM5A	9.26145	58.5431	67.6831	87.9472	40.2649	32.0283	11.5336
KDM5B	0.128592	0.0481324	0.113885	2.65821	10.8092	14.8586	20.0635
KHSRP	3.48399	6.51313	7.15688	12.2257	9.95539	4.51932	5.03367
KIAA0391	1.18316	1.90043	3.52436	23.1884	23.3346	16.4011	12.9406
KIAA0895	5.66626	2.09366	2.28865	3.75713	13.0926	3.46418	2.56132
KIAA0907	5.48228	3.88694	4.98305	10.5183	37.3697	30.464	40.5861
KIAA1143	23.6573	16.6951	15.6785	72.0574	447.379	182.873	122.241
KIAA1324	3.50577	14.5727	17.4448	20.554	3.76216	4.09364	0.1531
KIAA1328	7.30651	13.4927	19.9766	15.2737	7.11888	7.889	15.5294
KIAA1522	2.18861	7.59395	7.13845	4.95923	5.29297	8.23322	9.97119
KIAA1524	32.2257	33.9164	37.8519	67.8308	34.0958	18.0533	8.71368
KIF1BP	8.8462	3.64612	3.76299	8.75009	23.1429	13.698	14.9807
KIF20A	30.1017	101.51	110.752	110.873	82	110.874	69.7091
KIF22	3.14545	17.9244	22.5551	23.5405	38.0383	104.619	41.986
KIF2C	28.4975	70.1364	58.6121	61.4444	124.493	169.663	54.5228
KIF3A	25.6684	85.0368	85.7797	68.8785	51.4834	45.3258	11.6189
KIF3C	0.959921	4.75796	4.65797	5.48243	2.72361	1.57354	0.143452
KIFC1	0.51205	3.79695	4.61454	8.96718	21.3545	23.9459	6.02814
KIN	10.5827	8.18844	4.44624	14.8851	50.8484	62.6075	67.3151
KIT	6.28302	24.596	21.644	23.2279	16.3111	17.8277	5.42503
KITLG	25.3467	25.0116	17.64	29.683	37.5511	28.5239	41.9796
KIZ	15.9307	70.059	64.5373	40.1462	17.5917	21.9506	22.1678
KLC4	0.739665	4.04375	3.29213	2.1069	7.81247	13.5473	31.701
KLF10	0.0426425	0.196764	2.34946	35.5149	84.3998	130.314	64.0832
KLF17	0	0.0707517	7.76731	134.553	219.326	205.507	60.9174
KLF3	8.75119	10.3441	8.51713	11.4228	25.1746	35.2993	26.6854
KLF4	10.5187	4.08685	4.52729	32.0071	83.3727	84.5028	18.4005
KLF7	17.563	27.6104	33.2541	35.2285	30.5507	8.60434	11.4504
KLF8	0.568099	0.467458	1.04054	7.35075	15.4446	12.9596	8.02713
KLHDC3	0.981002	3.72597	6.10792	4.26325	16.3055	18.8796	13.4218
KLHL11	6.98013	17.5907	26.141	57.1416	36.6633	32.6837	2.65807
KLHL18	5.53587	21.0025	21.3725	19.151	8.40102	7.23608	2.63424
KLHL28	3.65785	2.19169	2.29013	5.68545	14.809	8.54821	5.39941
KLK12	0.02876	0.161387	0.884053	2.48549	10.6436	12.6657	1.72402
KLK13	0.011621	0.12387	0.348932	1.15669	10.9286	5.75186	0.111291
KMT2A	2.04021	6.14726	6.16818	6.72572	3.70535	4.33972	1.96035
KMT2C	13.8031	52.6011	47.1024	40.126	15.8216	20.0124	7.43964
KMT2E	20.3457	93.9534	99.9662	83.6015	54.3331	34.1735	13.2724
KMT5A	7.73681	19.487	20.6905	22.7746	32.0403	14.5032	13.3828
KNOP1	0.819989	1.42905	1.35191	9.03622	73.6184	77.1838	44.8531
KPNA1	1.00498	1.4822	1.41848	4.86846	13.4561	26.5653	15.1595
KPNA6	5.38673	25.8305	27.7753	27.6417	48.4734	44.6984	13.5727
KPNA7	872.877	5780	5588.63	3011.38	1195.74	2556.88	9.29766
KPNB1	2.78185	3.74207	3.80828	9.08939	18.1802	16.9068	37.7088
KRIT1	4.33251	3.17224	2.50946	4.88526	5.58488	4.95561	7.46161
KRT10	3.06455	0.0509978	0.339212	0.415691	6.16149	7.64317	4.89532
KSR2	5.02458	17.6898	19.8598	17.0327	7.87044	4.42435	0.191779
KTI12	1.64285	1.56613	1.48512	3.90906	11.0159	8.78746	4.39106
KXD1	0.452427	6.80653	8.11936	15.7583	118.976	85.3991	240.426
KYAT1	7.41963	82.225	35.13	16.2802	10.1212	17.3805	84.7577
KYAT3	3.62078	3.17004	1.86439	3.56764	12.2604	11.154	77.9491
L3MBTL3	8.28254	15.9472	16.1953	18.2534	9.31047	4.78819	17.2133
LALBA	2.40365	8.16993	9.00628	13.2068	12.9093	5.02045	0.581428
LAMP2	8.49475	6.86787	7.19118	18.2786	15.564	14.6056	286.303
LAMTOR2	3.60219	1.13262	0.608881	2.72052	21.1539	8.85321	52.8245
LAMTOR3	448.63	76.7411	76.1619	58.8667	192.884	197.867	116.922
LAMTOR4	4.95418	3.21044	4.44373	5.05251	12.3682	10.6901	62.7543
LAP3	2.29434	6.57952	8.82178	6.73665	12.8335	26.1691	65.3811
LAPTM4B	12.3276	34.2249	42.402	47.1971	20.4795	12.2167	17.282
LARP1	4.22495	17.3718	19.3556	22.3573	17.806	10.4018	48.3524
LARP4	35.9492	24.6433	22.9693	32.3142	56.5715	41.055	18.4442
LARP7	23.3747	52.7116	67.9655	57.475	105.567	53.7454	55.148
LAS1L	5.56506	19.1596	16.96	24.0442	61.1131	64.0458	78.9577
LASP1	0.370744	0.542472	0.703869	1.19407	21.9015	39.0122	232.501
LCLAT1	9.23933	20.3157	22.7864	29.7325	53.6593	35.164	8.6449
LCMT1	12.9542	113.238	150.778	160.106	195.778	106.724	136.921
LDAH	1.11004	1.6133	1.59451	1.42739	7.48055	3.99209	12.9186
LDHA	18.9585	85.5497	132.896	127.63	66.8068	45.1649	78.5734
LDHB	45.5389	4.64256	97.9942	0.99214	338.599	150.561	898.074
LDHB-2	39.6941	67.2941	82.068	128.342	262.008	279.164	1546.49
LDLR	3.12268	3.05663	1.99099	3.02367	5.38686	10.6954	2.1414
LDLRAP1	1.22797	12.9433	11.4036	7.07763	4.16491	4.35747	5.20839
LDOC1	4.16506	8.3311	7.07654	11.0263	4.46565	4.08069	2.70969
LEF1	14.5598	38.7906	48.0509	36.5678	16.2451	6.38728	0.829295
LEO1	58.8017	78.5999	48.7154	32.441	100.007	72.3157	52.2002
LEPROT	43.5949	160.482	163.718	171.309	61.2852	54.4997	75.0621
LEPROTL1	1.45977	1.45709	1.49859	2.26511	17.3063	17.2068	18.1241
LETM2	2.51039	11.6825	9.51377	11.239	3.16662	2.99973	1.47326
LEUTX	7.08292	3.93306	20.4558	139.218	112.903	56.9764	2.30527
LGALS1	0.185853	0.372593	0.680169	12.4839	124.881	135.174	313.897
LGALS4	0.624875	0.112207	0.142888	0.640831	5.8559	12.7909	51.9047
LHB	0.286491	0.352557	1.98222	4.68929	16.2021	43.7652	16.0812
LHFPL1	10.5133	21.8417	18.0537	29.8865	18.8157	8.9467	0.466336
LHFPL2	4.01024	12.1241	13.1298	14.5878	8.344	7.89557	26.547
LHX6	0.647402	2.04033	1.92478	2.2191	6.43072	5.67605	0.309943
LHX8	13.1099	54.5589	55.7014	60.7214	76.6971	55.3211	1.19153
LIMS1	0.402222	0.289515	0.741027	1.71502	5.25765	4.27544	11.8301
LIMS2	1.00976	7.46283	14.1889	5.11665	6.69238	5.72521	4.73796
LIN28A	7.87544	22.4984	22.2677	23.0198	7.72991	5.27299	23.0531
LIN37	21.3954	50.7375	19.3501	18.9352	42.2909	47.6992	59.4806
LIN52	17.2989	66.4297	63.6772	79.5849	61.8351	25.04	24.2388
LIN9	6.08352	3.05706	2.22415	3.50468	12.0702	11.7305	7.48343
LIPG	0.00682432	0.00680619	0.0721932	2.54688	9.56701	9.60088	0.333974
LIPT1	0.815248	0.445253	0.468028	0.716459	7.60129	4.58293	77.6785
LITAF	0.295673	1.87526	1.45162	17.304	35.3633	114.142	427.219
LLPH	33.5423	8.55112	5.54702	11.9443	29.5467	31.1601	11.1528
LMAN1	6.18361	3.41114	2.45726	6.72467	19.3104	14.2633	20.4529
LMAN2L	0.100341	0.50814	0.161439	1.76041	8.21383	7.90867	14.3394
LMBR1L	0.0171574	1.09499	1.38659	4.85251	10.9817	5.64678	4.08006
LMNB1	1.45511	5.83419	6.75357	5.74889	3.3149	1.93423	1.66321
LMO4	4.25879	11.3285	16.9252	106.663	73.3753	107.554	27.1937
LMOD3	8.45137	15.4824	16.6485	22.146	15.7237	5.02683	0.0771725
LOC100127131	278.708	470.877	678.618	802.543	334.648	443.857	983.617
LOC100152690	11.1912	3.42976	2.75006	4.69643	10.57	9.35073	0.729764
LOC100153150	8.71305	4.79481	4.32905	7.09826	14.8665	7.14877	8.53486
LOC100153163	0	0.0702692	0.667258	6.59147	6.46409	17.2026	0.409818
LOC100153598	2.32913	5.81201	6.254	5.1516	1.94486	2.16403	9.51443
LOC100154723	0.133544	2.2976	4.99901	7.99572	3.76025	1.25118	0
LOC100154873	0.234966	0.0171376	0.111664	2.59964	7.96708	7.58606	12.2127
LOC100155138	10.4505	22.3725	22.1485	21.9483	10.7705	11.226	6.93152
LOC100155534	0.0699349	2.69834	2.26806	2.02688	7.89343	5.83787	12.1115
LOC100156375	1.98763	6.15457	5.45679	3.68535	8.28813	6.75956	16.9211
LOC100156381	3.89739	3.19505	4.72883	8.05012	37.893	45.9133	52.9363
LOC100156879	1.90009	13.6067	12.8557	11.543	63.5963	97.2511	877.711
LOC100156967	52.4207	60.9332	42.2901	44.378	255.057	391.863	663.748
LOC100157391	6.38989	7.22657	7.82718	30.9702	210.184	147.278	91.2261
LOC100157935	77.6731	17.099	10.044	14.8146	64.5026	60.0749	107.793
LOC100157987	2.88761	2.88799	1.24475	1.80483	6.49044	10.0085	4.18457
LOC100510904	0.137412	1.15096	0.658971	1.378	10.4185	20.645	30.3124
LOC100510930	7.9314	21.3752	25.3478	21.6086	15.5288	16.9522	10.874
LOC100510975	7.66139	30.4431	41.6162	51.8479	18.5156	6.41839	0.229414
LOC100511846	552.964	198.989	117.301	209.526	302.549	290.509	54.222
LOC100511937	28.0804	94.6011	93.9292	80.812	32.6688	20.026	2.52706
LOC100512195	152.249	24.4597	16.9918	83.7799	318.335	327.761	183.708
LOC100512448	25.5463	10.9887	8.82827	3.60009	29.6653	61.8752	51.6231
LOC100512926	24.7796	6.62629	3.47204	6.50633	69.7981	70.5889	104.566
LOC100513346	33.9208	11.9332	12.0925	10.2687	57.4726	48.6651	48.4626
LOC100513415	2.78515	145.36	173.588	524.823	1100.28	727.091	183.762
LOC100513607	0.0163457	0.531944	141.639	973.716	626.249	498.158	45.9724
LOC100513741	0.32611	0.783981	1.13638	11.2921	25.3448	20.6553	26.9269
LOC100513838	0	0.126726	0.157448	2.02166	5.5944	5.75753	0.231901
LOC100514110	0.651817	2.83727	22.6651	148.618	126.53	98.2417	8.923
LOC100514282	0.497125	0.0697769	1.61542	10.1109	40.4444	23.5539	86.4838
LOC100514356	0.00502242	0.0121416	6.80167	48.854	6.35235	8.11607	1.01375
LOC100514469	2.13366	3.71745	4.66688	10.7445	14.971	8.3141	4.66887
LOC100514656	3.07458	4.06336	4.01599	4.69483	6.99828	7.19001	9.79978
LOC100514912	0.0992681	21.6307	185.843	5128.9	15435	0	1542.51
LOC100515118	42.1097	13.8668	5.16631	3.26376	22.4917	18.0566	46.9372
LOC100515185	7.80428	17.0915	24.3515	26.6957	13.0477	5.87083	0.300086
LOC100515519	3.34406	0.788115	0.276863	0.648409	9.91577	8.57321	19.0838
LOC100515533	9.65333	14.9182	18.1123	22.0583	11.4906	1.50395	0.0197805
LOC100516308	2.27688	2.61899	4.13733	5.8879	2.61209	0.894212	3.08257
LOC100516355	8.73001	57.6571	55.8782	66.0182	77.6989	56.7957	19.5664
LOC100516390	11.1888	34.6114	33.0215	26.2159	12.2672	9.93186	8.78443
LOC100516891	4.0147	5.4464	5.53296	9.48032	13.3287	4.73669	3.79107
LOC100516915	0.0205812	0.124429	19.1985	118.477	71.451	34.3914	2.34517
LOC100517101	0	0.0424474	41.2882	283.252	58.6562	49.9814	2.35875
LOC100517149	0.837675	2.83722	2.76896	4.58305	12.0971	8.86935	5.0907
LOC100517659	0	0.0219234	2.2572	22.6106	11.3815	1.21236	0.0398916
LOC100517731	9.76686	94.5344	96.0252	46.1087	19.5126	31.6445	8.061
LOC100517809	1.00263	10.0821	8.83494	8.81208	17.6813	31.2602	3.31241
LOC100517830	0	0.167708	25.7292	226.55	53.9346	86.0472	3.40088
LOC100517855	0.727252	0.556389	1.20456	7.02102	18.1431	25.8317	8.63461
LOC100518109	7.92936	27.7024	40.0123	36.1301	17.5897	11.0537	1.11081
LOC100518203	0.440204	3.52947	5.43698	7.2444	2.97762	1.5562	0.218689
LOC100518351	0.0659409	0.331935	0.711636	5.53967	19.0695	13.5153	4.45182
LOC100518491	0	0.799996	23.6262	309.173	645.032	538.294	11.0887
LOC100518575	7.56758	16.4266	18.3109	14.6021	52.6533	38.3807	183.462
LOC100518738	3.08442	7.78486	7.6678	8.13644	4.2243	3.28074	1.96162
LOC100518827	5.11233	2.04477	1.02077	2.3878	11.0896	10.7949	2.73904
LOC100518848	50.9541	11.4717	6.14222	65.2681	337.587	263.622	735.544
LOC100519039	0.812176	11.432	11.1619	7.53781	2.17961	1.79099	0.206497
LOC100519643	11.6144	79.0725	64.9701	37.961	16.777	19.2475	14.0545
LOC100519808	0.973687	3.29967	5.81509	7.9636	8.33533	7.78977	13.5023
LOC100520389	1.00799	1.64843	1.66827	15.0994	57.9919	40.2331	19.0734
LOC100520556	0	0	1.69446	7.58895	1.04706	1.06095	0.0321237
LOC100520720	1.35155	3.74446	4.68932	5.53986	3.19728	1.41351	1.15364
LOC100520903	2.80992	4.8711	4.61437	5.65687	3.79632	1.08684	0.12277
LOC100521069	1.53123	1.62857	2.92156	6.66895	43.3232	25.0358	29.411
LOC100521207	2.41532	5.85715	7.40478	9.95866	3.77819	1.37875	0.0319211
LOC100521256	1.74058	3.76855	3.08941	10.0286	13.41	7.7676	27.081
LOC100521431	0.476572	0.24061	0.358111	0.59967	8.27635	7.64204	76.9055
LOC100521438	1.4617	5.48304	5.05538	5.21622	1.22305	2.19474	0.111133
LOC100521510	0.0466672	0.221168	0.642123	23.6922	190.631	241.275	255.522
LOC100522130	13.1978	44.9267	57.2778	43.3246	132.114	123.842	330.83
LOC100522178	1.42685	11.9467	10.672	27.21	13.4399	2.45116	3.56788
LOC100522498	14.9711	1.42365	1.13874	1.29095	5.11447	3.70003	1.15226
LOC100522678	8.76457	3.98712	2.5738	4.24384	9.64063	12.6711	37.3032
LOC100522722	3.05105	6.48529	11.486	11.9575	26.865	25.1602	62.6607
LOC100522784	2.6307	14.3987	18.5477	16.7786	6.97078	2.84442	0.0975561
LOC100522842	68.0686	5.73906	2.13191	0.894425	10.3842	8.27015	2.75463
LOC100522977	1.11344	8.57086	14.4862	27.2489	6.19018	1.9533	0
LOC100523167	1.10334	13.7839	23.9782	21.184	6.91693	1.45305	0.0957406
LOC100523244	24.1189	109.416	96.4838	95.0532	398.294	637.954	177.723
LOC100523534	1.8653	6.01452	5.83593	8.35108	2.95781	1.10993	0.0207546
LOC100523887	2.52299	4.99148	5.93848	7.63091	2.39178	1.99384	0.0325363
LOC100523897	2.77833	5.01309	7.49252	5.77039	4.0047	1.9798	0.549692
LOC100523964	0.141516	1.54282	1.92794	3.62562	14.8386	10.7772	1.08022
LOC100524034	0	0	12.991	52.879	13.0166	16.5029	0.25112
LOC100524239	3.33469	0.340987	0	0.210568	8.68064	13.1845	55.5281
LOC100524308	41.7996	42.5787	43.8071	44.7255	240.849	176.271	956.364
LOC100524388	8.10197	37.7581	65.287	60.6099	30.5169	15.9231	1.19496
LOC100524613	1.52176	0.7882	0.661562	1.50474	23.8897	35.3172	118.437
LOC100524727	3.44795	7.18035	8.92611	12.2755	11.8299	16.0482	1.69269
LOC100525232	95.8259	3.25463	1.23185	3.35878	8.28403	9.90638	6.30491
LOC100525472	4.1856	2.38683	1.69372	1.59798	7.90197	9.52898	11.7647
LOC100525613	0	0	0	10.2173	78.593	24.7082	52.3501
LOC100525679	3.09045	0.344835	0.626483	1.09599	5.58017	7.30216	1.43169
LOC100525692	23.1808	16.4457	12.9655	16.9601	46.3136	51.0657	100.924
LOC100525750	14.4415	48.2467	35.4193	38.9182	12.2455	18.9889	0.0290003
LOC100525835	0.975514	17.0912	10.4248	7.84606	6.74537	2.94245	0.228885
LOC100526184	1.445	11.4453	10.7547	11.0395	5.78537	2.04533	0.192877
LOC100526209	1.65337	6.66244	5.51709	3.45304	18.1304	15.7844	11.7739
LOC100620152	0.0514164	0.320407	0.203641	0.750599	8.36699	2.53103	1.17887
LOC100620188	1.40661	6.74386	9.49468	45.3908	40.3334	27.9105	11.4361
LOC100620238	6.77104	7.17243	6.56428	10.56	31.1922	33.4691	40.6118
LOC100620498	0.00819789	0.520683	0.459884	2.5849	12.7005	11.1424	11.1052
LOC100620521	2.0865	5.58812	5.60013	3.5237	8.62363	3.40246	3.01187
LOC100620827	1.90173	8.05189	17.4318	63.4786	390.811	270.64	39.4973
LOC100620900	0.529343	5.24772	6.92893	7.36591	2.74946	1.25952	0.223248
LOC100621115	2.37283	1.94934	1.33519	3.75848	9.55064	9.72726	6.5861
LOC100621287	29.7096	36.1656	39.0348	32.3392	204.39	215.695	117.485
LOC100621388	3.21063	8.26076	5.23969	3.98283	10.3063	23.649	4.85009
LOC100621400	0.888056	0	0	2.15149	7.05674	4.08678	2.83364
LOC100621607	13.2538	32.9208	36.9663	34.8908	22.2415	17.5131	0.813996
LOC100621706	0	0	0	34354.6	38059.2	35411.7	132.948
LOC100621782	0.0190407	0.480784	16.2284	452.105	844.443	472.543	361.773
LOC100621972	0	31.0435	64.9878	254.171	75.513	89.4488	197.869
LOC100622504	0	0	0.588633	2.516	8.12637	5.69584	2.71294
LOC100622639	0.0372956	0.223462	0.673257	1.67439	9.73148	4.93388	0.106682
LOC100622897	1.89975	4.04506	3.85509	1.71663	5.50404	4.29877	5.92363
LOC100622980	4.87986	3.05089	3.5424	5.72853	10.043	10.3549	20.7163
LOC100623035	14.6981	55.5993	63.6524	95.028	82.0697	47.6841	17.3993
LOC100623167	0.573693	0.742389	28.1199	304.757	251.468	403.731	22.5593
LOC100623257	0	0.175476	4.10006	18.6635	10.0422	10.7921	2.1437
LOC100623540	16.9621	4.97749	0.997525	10.7193	31.1786	36.5569	4.7898
LOC100624067	10.6857	6.36243	2.58634	6.18009	64.3381	70.3002	137.452
LOC100624495	12.5402	37.8268	28.4894	33.9223	41.3928	36.3034	46.7171
LOC100624559	1.89347	8.01632	8.0391	9.99091	10.9111	5.1163	2.14201
LOC100624681	0.416259	1.45653	11.0287	199.323	272.904	429.338	16.8349
LOC100624806	3.27309	3.50466	5.10159	5.65472	7.0355	2.98839	1.44262
LOC100624852	0	0.0646063	15.4182	117.323	12.3813	2.91385	0.611134
LOC100625049	3.77247	8.73711	7.31208	17.9047	91.2482	39.1428	149.948
LOC100625127	0	0.188481	145.455	1047.8	274.012	137.257	8.94933
LOC100625564	0.931752	3.09777	3.0197	6.05454	2.09025	0.796655	0
LOC100625694	0.694928	0.289247	0.255241	1.86302	5.40019	3.28194	2.8475
LOC100625897	2.5155	12.0448	11.2125	9.63545	3.20191	2.02076	0.246161
LOC100626250	0.112602	0.0791056	0.320869	3.50081	40.2441	30.3956	25.7133
LOC100626328	0	0	0.590911	5.21394	2.51784	1.03865	0.0172593
LOC100626390	3.54665	8.06131	8.44972	7.56014	4.16006	1.71325	0.476085
LOC100626407	0.0603621	0.698616	0.46122	1.2343	8.07548	7.47448	2.17068
LOC100626505	0.149108	0.528466	0.562703	0.852984	9.34289	3.32331	1.4657
LOC100626580	5.2115	10.8992	10.6434	11.1887	5.53404	1.84052	0.0744784
LOC100626752	8.94138	19.0994	24.0842	24.1094	50.8428	25.7684	22.6812
LOC100627091	6.2027	14.5013	13.1439	15.1756	19.2674	19.0957	11.3248
LOC100627175	101.036	1140.56	1228.64	996.478	432.021	484.262	26.4624
LOC100627222	21.1713	33.805	36.2045	46.4769	44.1165	24.0799	62.1057
LOC100627241	13.7704	28.5833	27.4248	43.5808	29.8242	7.79627	7.57553
LOC100627283	42.2134	179.933	178.516	99.2497	73.0057	80.4526	92.6326
LOC100627380	0	0	4.70756	33.2985	16.6129	6.46513	0.351269
LOC100627410	150.509	12.299	12.1073	34.0337	95.7748	198.534	102.705
LOC100627422	3.4464	5.96329	6.5424	8.08261	6.2883	2.43811	1.91808
LOC100627657	0.00841519	0.00834133	1.13794	8.19566	4.68801	2.13767	0.0597154
LOC100628233	0.317438	0.78195	0.855775	20.1498	172.608	124.225	549.178
LOC100737142	1.10359	4.17839	7.46632	9.88859	9.71833	7.57999	5.01435
LOC100737224	0.0386919	0	19.9809	103.024	22.6164	15.0488	0.634879
LOC100737265	38.6453	1.35999	1.75117	2.44823	9.50724	9.33868	4.00282
LOC100737582	1.76413	6.49951	6.36378	9.38905	9.35089	5.75169	5.47901
LOC100737633	0.0223451	0.427905	68.048	633.509	213.743	379.773	13.8246
LOC100737657	26.9161	5.95792	6.36754	12.9855	115.118	97.657	127.3
LOC100737881	0	0.212203	84.4187	650.883	211.504	219.239	7.10148
LOC100737926	0	0.0413075	8.52092	181.125	360.799	143.326	3.66913
LOC100737973	0	0	7.16531	53.7601	5.93932	22.1774	0.27718
LOC100737977	0	0.0293681	0.108347	3.39187	26.0127	39.5038	13.1661
LOC100738134	5.91945	8.18898	8.99799	12.1564	25.3928	16.2881	6.93553
LOC100738529	1.11887	4.61105	8.90153	5.47495	4.70683	1.47208	1.0379
LOC100738533	3.13554	6.80537	6.52395	12.3195	4.20917	2.17145	0.0786547
LOC100738642	16.6649	37.2953	30.236	43.9363	24.5704	13.2407	20.543
LOC100738684	1.40875	1.99267	3.01747	2.80707	29.0883	22.7241	136.499
LOC100738822	5.31197	4.2397	3.91174	2.92246	8.50045	7.49636	0.985114
LOC100738909	4.24546	10.2962	12.1396	8.85599	17.6776	6.91231	9.77808
LOC100739087	83.2939	101.839	96.8146	174.758	946.785	954.963	1333.3
LOC100739161	0	0	11.7267	51.1779	10.3867	3.42419	0.447102
LOC100739163	0	0	1.46509	0.680615	9.87943	42.3576	424.82
LOC100739557	1.96167	7.56101	6.04364	8.87918	38.1014	7.23872	12.4052
LOC100739613	0	0.0205984	3.33075	37.0758	65.9002	30.9213	0.451912
LOC100739663	0	0	0	9.15854	0	7.3225	30.9047
LOC100739719	0.0236335	0.728236	1.58189	6.35826	31.4742	43.5596	600.937
LOC102157658	15.3547	138.651	164.136	138.573	52.9655	33.4673	5.96523
LOC102157770	0.664644	2.50145	1.08764	1.45801	19.5736	14.9427	14.9418
LOC102157889	0.647795	0.308609	24.4852	274.968	321.594	156.079	124.01
LOC102157940	2.62721	7.87079	8.51973	5.68251	1.31541	0.825234	0
LOC102158155	0.148986	2.53409	3.24336	4.98262	29.423	22.4876	47.3329
LOC102159694	306.254	984.425	1114.75	1025.24	371.104	283.287	15.5161
LOC102159768	0.968933	2.59047	3.85482	10.2361	27.4241	25.7206	12.5422
LOC102160336	20.6192	153.253	189.67	120.12	187.529	156.717	236.998
LOC102161977	40.49	187.138	231.764	202.724	67.4364	42.7478	1.03114
LOC102162195	5.24661	34.3843	27.1335	41.7278	34.4859	11.0666	0.870619
LOC102162366	0	0.0328151	3.91776	30.3123	3.59095	4.86298	2.20098
LOC102162473	0.38559	6.22373	4.1247	8.39531	2.52742	1.62112	0.126078
LOC102162486	1.32038	5.53087	6.18942	18.2605	33.7343	33.9383	11.4657
LOC102163398	0	0.0300075	0.822313	7.85385	25.0324	18.2586	8.91389
LOC102163658	0	0.134097	28.6227	257.574	132.837	96.9091	4.1359
LOC102163742	4.85245	14.6973	16.1873	10.0508	7.44831	3.5151	4.69694
LOC102164650	4.67007	8.618	10.2207	10.7647	8.27506	5.37559	3.27745
LOC102165904	23.7338	136.054	245.652	183.998	64.1749	52.9316	0.0716188
LOC102166000	0.872343	5.70073	7.45825	8.47828	3.16262	1.31385	0.077628
LOC102166107	17.6832	109.793	207.179	181.332	46.3485	34.2284	0.772772
LOC102166523	6.72072	0.829239	0.97049	4.87684	5.38175	5.22688	7.75019
LOC102166678	0.792158	4.74669	4.09218	6.13229	3.63819	0.962767	1.20408
LOC102167341	2.40906	1.31785	2.52919	2.06557	9.46225	6.23814	11.5621
LOC102167410	3.64098	4.12529	8.17443	9.0093	8.89284	9.26047	37.8319
LOC102167984	0	0	3.19097	24.5857	25.2228	35.0502	1.26271
LOC106504372	0	0	0	29.31	0	0	0
LOC106505872	1.30997	10.4529	37.6103	365.883	251.19	95.6783	4.77045
LOC106506012	3.46713	10.5989	13.2777	10.5263	4.38294	2.76438	0
LOC106506205	0	0.221568	17.5524	162.482	108.188	119.675	5.09979
LOC106507314	0.0775094	0.33186	43.8834	556.479	660.99	295.711	4.37579
LOC106507778	0	0.175171	9.6363	345.487	775.122	309.014	1.88749
LOC106508100	45.3599	31.4652	33.4259	36.4234	119.049	72.8908	9.68801
LOC106508546	10.3354	22.7782	22.2713	26.7553	15.2784	7.1259	0.140415
LOC106510200	6.3921	62.4265	87.4051	96.3594	45.654	13.9796	7.28152
LOC106510284	0.111148	2.47426	2.98352	3.91576	6.06403	8.88664	7.12436
LOC106510528	1.21205	2.72094	2.79493	2.52688	6.00676	3.04629	6.3918
LOC106510532	7.58955	39.6156	46.254	58.382	33.2886	2.72416	11.9749
LOC106510534	0.135397	0.439893	1.38486	12.493	20.8965	5.171	6.39329
LOC106510590	0.0555104	0.454935	1.93478	10.0011	3.9431	4.04537	0.168685
LOC110255247	1.83638	24.1933	35.915	37.9533	12.7542	3.9621	3.06446
LOC110255254	0.509767	0.342868	0.53508	0	10.0315	6.16242	18.5726
LOC110255260	1.68255	1.1282	1.7212	1.25094	5.17188	2.19019	4.33614
LOC110255283	11.9938	52.164	59.6927	50.8605	25.6618	8.72871	18.2604
LOC110255430	8.45167	16.6049	18.8304	31.629	21.2554	5.29738	0.0361444
LOC110255605	3.34358	4.20278	5.06854	7.3188	2.15579	1.26535	0.114325
LOC110255703	0.256265	14.1436	16.0837	17.1188	5.62596	6.35282	0.444336
LOC110255871	18.8697	42.4319	58.657	44.1482	32.0136	6.99877	0
LOC110256009	0	0	1.54985	5.77882	1.1328	0.64614	0.0975109
LOC110256111	15.2624	176.182	223.794	199.246	79.8041	57.3074	0.877407
LOC110256677	0.0552929	0	6.85804	60.2289	34.3374	50.7336	30.322
LOC110257042	7.09305	24.7764	22.0853	25.714	12.2546	4.89566	0.707519
LOC110257058	2.23912	8.75707	7.92572	14.0873	4.45045	1.12097	0.0841378
LOC110257408	2.06885	2.67535	5.35564	5.2954	5.00146	3.88715	7.32927
LOC110257594	0.750178	2.97266	13.9827	324.381	566.542	537.051	25.7215
LOC110257684	23.0753	12.7956	11.3789	16.4318	49.6481	17.5875	7.56692
LOC110257789	13.4834	74.7756	51.0155	38.5548	22.4444	63.8348	0
LOC110258552	6.65227	22.1546	23.6685	13.9617	7.13437	5.5527	0.0736956
LOC110258553	2.27527	11.7723	8.80478	11.5343	4.68572	2.45476	0.091974
LOC110258626	1.70893	7.80392	22.9727	12.0198	6.13155	1.13027	0
LOC110259107	4.49843	17.1394	24.0309	20.7805	15.7394	10.3962	17.883
LOC110259272	2.74587	8.77392	9.93073	17.453	4.68048	3.06863	0.0299143
LOC110259370	0.986309	2.9774	2.81157	26.7784	51.3434	59.2686	47.1825
LOC110259585	17.6094	4.58386	5.3244	13.1144	12.2683	5.82971	0.198077
LOC110259658	0	0.0618284	1.30222	10.4085	29.8528	10.0661	0.79067
LOC110259662	2.33274	15.1762	16.6018	17.6126	9.64157	10.2456	6.57942
LOC110259862	8.15503	24.3806	25.5759	21.5456	9.65079	5.7057	2.21946
LOC110259883	5.61008	174.858	306.082	346.626	156.6	73.5099	5.5272
LOC110260088	4.73969	12.4468	8.12528	38.4611	141.956	184.439	133.318
LOC110260093	1.04132	3.46119	4.73562	5.92357	16.8547	8.52188	8.1344
LOC110260465	0	0	0	1.52146	7.06938	2.82929	4.11948
LOC110260598	1.50173	4.12952	3.82572	4.39203	6.83272	6.30908	2.20326
LOC110260660	36.3341	66.3802	41.2339	50.664	110.763	123.585	79.5947
LOC110260747	0.139932	0.194783	0.598627	3.64821	5.20925	3.89636	0.0507649
LOC110261040	0.148974	0.560669	0.737547	0.931665	5.86112	2.13078	0.670094
LOC110261176	0.486137	3.7007	3.7385	5.09372	1.75082	1.4283	3.16079
LOC110261249	4.40205	1.64969	7.09997	161.669	494.086	531.188	293.05
LOC110261289	2.39598	5.01261	3.01263	7.30384	34.0114	61.4604	50.2405
LOC110261290	2.18049	5.50725	7.80112	7.06661	4.33685	2.43608	4.85789
LOC110261291	12.9314	120.609	114.012	126.804	54.2561	37.4674	16.6163
LOC110261292	0.634206	4.75414	4.95383	9.8301	26.7257	17.6586	6.27499
LOC110261293	0.206396	1.29645	1.771	2.78038	7.20063	5.23497	2.05937
LOC110261296	1.08863	3.77018	3.14303	6.29074	11.7752	10.536	8.77974
LOC110261303	2.0259	7.81396	15.5339	31.9673	5.08598	5.99921	0.366908
LOC110261306	1.15454	3.96351	3.2767	4.48227	7.29308	6.99595	4.12385
LOC110261321	3.03852	6.43626	5.63035	8.29132	23.1505	20.1925	18.2212
LOC110261322	7.23187	8.91127	7.2058	16.3192	76.8447	93.1967	38.6297
LOC110261326	0.497314	3.31893	4.98519	29.9175	61.0557	58.0543	10.0653
LOC110261353	0	0.601758	3.10605	49.7402	155.616	118.915	1.40269
LOC110261367	2.27491	3.57678	17.6562	68.6967	9.4964	23.4314	0.783813
LOC110261378	0	0	1.09915	15.1386	15.9351	11.3337	0.0326488
LOC110261380	1.02706	3.97292	7.29548	119.781	344.228	413.283	142.71
LOC110261493	7.27567	29.2159	29.5817	36.2826	58.0009	51.9141	16.5378
LOC110261661	0.68721	5.94282	6.61287	11.8167	11.0925	4.26537	4.54983
LOC110261667	6.22843	11.3666	14.8765	20.312	6.26024	4.76136	0
LOC110261685	14.4774	17.928	23.4818	64.5612	90.0944	78.7666	111.881
LOC110261738	0.0188037	0	0.0612179	1.23654	10.6943	5.54722	1.41723
LOC110261945	0.0353385	1.20895	78.1527	1851.98	3022.4	1244.39	22.403
LOC110262006	0	0.0126025	0.83314	6.01923	11.9395	11.9891	3.14117
LOC110262272	4.68232	0	0	24.8778	114.699	168.342	578.499
LOC396787	3.31015	37.1117	84.2625	119.29	48.8809	6.38133	0
LOC396905	5.15408	22.4542	33.5182	34.0942	18.231	5.79813	1.37247
LOC595122	3.33483	10.9058	18.645	13.0244	42.7777	105.194	27.0201
LOC641352	0.773714	0.397468	0.450389	4.93943	15.093	7.39545	2.50465
LOC733637	158.59	70.1109	51.9704	61.6498	138.402	134.345	337.236
LONP2	47.1002	157.825	173.031	172.718	56.1576	36.882	43.1906
LPAR1	4.90056	8.78282	8.24212	8.45649	16.522	13.4779	14.3803
LPAR2	0.0493762	2.89629	2.92076	5.85183	23.0692	10.1302	54.0814
LPCAT3	0.0715334	0.845887	0.809987	2.06533	8.04528	5.50706	58.1444
LRCH3	10.8286	5.777	3.33496	1.90583	10.3181	9.60336	22.554
LRG1	0.108247	2.94113	4.83111	6.51608	3.34659	1.11873	0.176411
LRIF1	2.40136	1.45968	1.03128	4.7295	11.9954	8.06287	5.21992
LRPAP1	0.335349	0.270957	0.568244	0.692843	12.0891	9.77716	431.435
LRRC42	29.6371	48.279	60.2076	116.877	96.4426	120.173	19.4402
LRRC4C	2.17019	8.58427	8.98802	10.3898	6.87406	5.07929	13.8408
LRRC57	0.836594	0.257345	0.335511	8.54658	28.0825	22.8459	12.995
LRRC59	0.585835	32.4898	45.2943	40.4832	95.3537	113.965	65.839
LRRFIP2	7.82651	46.2121	57.8427	46.872	30.4221	24.3482	27.7675
LRRN3	0.0200544	0.00535125	0.0422229	1.45052	6.15255	7.44881	0.264205
LSG1	1.7123	7.02915	7.24291	75.1924	140.199	114.539	36.862
LSM1	12.7224	25.6326	31.6485	42.5036	84.5791	69.4423	63.6829
[truncated: 2,178 more rows]
