# Supplementary material for: Coordination of zygotic genome activation entry and exit by H3K4me3 and H3K27me3 in porcine early embryos
Source: HighWire-hosted journal article supplement (doi:10.1101/gr.276207.121), 2022-07-22
Supplement: Supplemental_Table_S5.xlsx [file Supplemental_Table_S5.xlsx]

## Sheet: Fig. 3
Supplemental Table S5. Differentially expressed genes between siKDM5B/C and Ctrl IVF 4-cell embryos, SCNT 4-cell embryos and IVF 4-cell embryos, and GSK126-treated IVF blastocyst and untreated blastocyst
Gene	siKDM5B/C_4C_normalized	Ctrl_4C_normalized	log2FoldChange	pvalue	padj	Status	ZGA gene
A2ML1	3.6288	21.2385	-2.54912	0.0188292	0.0380851	Down	No
AAED1	11.516	57.1117	-2.31015	0.00204755	0.00514448	Down	No
AAMDC	3.74455	205.906	-5.78105	6.15851e-12	5.00403e-11	Down	No
AAMP	23.7141	174.536	-2.87971	1.41101e-14	1.52788e-13	Down	Yes
AAR2	21.6975	249.091	-3.52107	2.96202e-24	7.72093e-23	Down	Yes
AARS	343.643	1151.91	-1.74504	1.37967e-10	9.51545e-10	Down	Yes
AARS2	1.4062	91.2143	-6.01939	1.60953e-10	1.09878e-09	Down	No
AARSD1	96.8601	196.476	-1.02038	0.0029909	0.0072722	Down	Yes
AASDH	575.242	1409.04	-1.29247	7.35581e-12	5.9145e-11	Down	No
AATF	97.9437	213.965	-1.12735	2.39727e-05	8.31649e-05	Down	Yes
ABCA12	126.067	538.613	-2.09506	5.4691e-08	2.77267e-07	Down	No
ABCB6	5.56207	161.785	-4.86231	0.000858439	0.00231931	Down	No
ABCB8	7.49084	70.3319	-3.23098	0.000991293	0.00264459	Down	No
ABCE1	759.127	3933.42	-2.37337	9.63092e-25	2.63563e-23	Down	Yes
ABCG2	142.832	1572.95	-3.46108	0.000406483	0.00115921	Down	No
ABHD10	112.06	442.874	-1.98262	4.27794e-09	2.48216e-08	Down	Yes
ABHD13	139.597	778.001	-2.4785	1.92987e-18	3.1313e-17	Down	Yes
ABHD17A	16.4213	74.03	-2.17254	8.32567e-05	0.000265658	Down	No
ABHD17C	156.767	543.894	-1.7947	1.09151e-07	5.33096e-07	Down	Yes
ABHD5	37.4747	688.783	-4.20006	2.49914e-35	1.44402e-33	Down	Yes
ABI1	1180.08	3912.39	-1.72917	4.1713e-23	9.9618e-22	Down	Yes
ABI2	65.7872	712.921	-3.43786	6.15776e-45	5.87558e-43	Down	No
ABL2	398.762	1109.33	-1.47609	1.92329e-14	2.04427e-13	Down	Yes
ABRAXAS1	97.1439	4253.96	-5.45254	4.74065e-97	7.04359e-94	Down	No
ABT1	283.419	1084.35	-1.93581	1.14891e-15	1.39431e-14	Down	Yes
ACAA2	40.005	434.24	-3.44024	8.11159e-25	2.24374e-23	Down	Yes
ACAD9	23.9277	160.702	-2.74763	3.11383e-07	1.42479e-06	Down	Yes
ACADL	162.284	446.454	-1.45999	3.56192e-05	0.000120513	Down	Yes
ACADSB	141.984	415.436	-1.5489	2.53599e-07	1.17617e-06	Down	No
ACAT2	259.278	1294.15	-2.31944	1.21582e-18	2.00239e-17	Down	Yes
ACD	9.28878	53.3854	-2.52289	0.000126869	0.000392241	Down	Yes
ACLY	337.485	1297.73	-1.94309	5.08057e-16	6.44397e-15	Down	Yes
ACOT11	2.67438	121.252	-5.50266	5.50788e-06	2.10799e-05	Down	No
ACOT13	2018.5	4869.05	-1.27036	2.90108e-08	1.52157e-07	Down	No
ACOT7	0.368182	145.748	-8.62884	1.22279e-08	6.71469e-08	Down	No
ACOT8	15.4761	123.382	-2.99502	1.36728e-09	8.40947e-09	Down	No
ACOX3	5.51334	24.764	-2.16725	0.0197012	0.0396713	Down	No
ACRBP	0.195543	13.2314	-6.08033	0.00163537	0.00418005	Down	No
ACSF3	2.7956	46.9432	-4.06969	5.97314e-06	2.27189e-05	Down	No
ACSL6	60.3834	4788.89	-6.3094	1.0386e-27	3.59465e-26	Down	No
ACTA1	1.08861	19.4229	-4.1572	0.0219495	0.0436534	Down	No
ACTL6A	404.662	2053.69	-2.34343	2.67239e-26	8.23532e-25	Down	Yes
ACTR3	1981.16	4998.74	-1.33522	8.52237e-08	4.20379e-07	Down	Yes
ACTR5	40.6252	104.021	-1.35643	0.0002841	0.00083245	Down	No
ACY1	33.8474	1517.69	-5.48668	2.90519e-43	2.48687e-41	Down	No
ADAM9	265.447	1365.38	-2.36281	2.68862e-10	1.79365e-09	Down	No
ADAMTS1	12.7983	430.864	-5.0732	5.0832e-09	2.9233e-08	Down	Yes
ADAMTS5	14.5206	531.191	-5.19306	2.91348e-25	8.47599e-24	Down	No
ADAT2	13.9429	247.36	-4.14901	3.91513e-30	1.62552e-28	Down	Yes
ADAT3	1.75983	18.0273	-3.35668	0.00473605	0.0110294	Down	Yes
ADCK5	3.68636	19.6688	-2.41564	0.018267	0.0370487	Down	No
ADCY4	1.68347	9.64742	-2.5187	0.02475	0.0485089	Down	No
ADGB	22.7303	127.423	-2.48694	4.08377e-07	1.83311e-06	Down	No
ADGRB2	0.0875475	5.38059	-5.94156	0.0071252	0.01599	Down	No
ADGRE5	11.9465	80.3229	-2.74923	5.53365e-10	3.55813e-09	Down	No
ADGRF2	0.0927502	20.0062	-7.75288	6.5143e-06	2.46326e-05	Down	No
ADGRL1	3.16408	34.8172	-3.45994	4.31778e-05	0.000143979	Down	No
ADIPOR1	295.742	820.786	-1.47267	7.64774e-07	3.31487e-06	Down	Yes
ADIPOR2	192.885	887.477	-2.20197	7.10957e-28	2.48131e-26	Down	Yes
ADK	80.0197	500.81	-2.64583	1.49502e-15	1.79653e-14	Down	Yes
ADNP	160.073	1398.08	-3.12664	6.21113e-35	3.49183e-33	Down	Yes
ADO	63.4765	379.839	-2.58109	3.23917e-15	3.73492e-14	Down	No
ADPRHL2	0.295405	41.2566	-7.12579	9.17284e-06	3.39812e-05	Down	Yes
ADPRM	329.244	767.548	-1.2211	5.22946e-08	2.65766e-07	Down	Yes
ADSL	41.5276	316.835	-2.93159	2.41611e-08	1.27781e-07	Down	Yes
ADSS	52.5002	1302.63	-4.63296	3.46788e-64	9.49149e-62	Down	Yes
ADTRP	9.76597	64.6575	-2.72698	2.38903e-05	8.28928e-05	Down	No
AEBP2	24.4558	3627.01	-7.21246	3.91449e-86	3.25701e-83	Down	Yes
AEN	18.658	337.351	-4.17638	6.12999e-09	3.48388e-08	Down	Yes
AFF1	448.866	985.002	-1.13384	2.18379e-07	1.02285e-06	Down	Yes
AFG3L2	164.796	455.99	-1.46832	1.02864e-06	4.38186e-06	Down	No
AGBL5	483.864	2972.08	-2.6188	3.19151e-24	8.27763e-23	Down	No
AGGF1	359.105	751.869	-1.06607	8.78178e-06	3.26663e-05	Down	No
AGO3	101.2	749.523	-2.88877	2.41089e-18	3.88149e-17	Down	No
AGTR1	43.2965	342.961	-2.98572	1.25503e-07	6.07113e-07	Down	Yes
AHCYL1	20.3217	236.011	-3.53776	6.38803e-15	7.13245e-14	Down	No
AHCYL2	46.9959	235.806	-2.32699	1.18858e-10	8.25225e-10	Down	No
AHNAK	54.3087	2546.76	-5.55134	2.56346e-09	1.52699e-08	Down	No
AHRR	0.524367	14.1582	-4.75492	0.0112731	0.024167	Down	No
AICDA	314.414	690.265	-1.13448	0.00517399	0.0119569	Down	Yes
AIMP2	7.1483	190.457	-4.73572	2.52637e-18	4.05487e-17	Down	Yes
AIP	17.9774	105.525	-2.55333	1.0228e-08	5.66585e-08	Down	Yes
AK4	293.404	1121.31	-1.93422	3.46892e-11	2.58534e-10	Down	Yes
AK5	2.38256	15.7742	-2.72699	0.018797	0.0380273	Down	No
AK6	575.009	3581.62	-2.63896	2.94366e-23	7.08693e-22	Down	Yes
AKAP12	109.737	342.048	-1.64014	5.44796e-05	0.00017894	Down	No
AKAP2	10.8525	163.951	-3.91716	5.39169e-11	3.90367e-10	Down	No
AKAP3	43.3893	139.997	-1.68999	6.12559e-07	2.68362e-06	Down	No
AKAP4	6.94203	108.037	-3.96002	3.27305e-12	2.73315e-11	Down	No
AKAP7	76.7706	204.292	-1.41201	3.53429e-05	0.000119598	Down	No
AKAP8	226.867	1651.96	-2.86426	3.24297e-24	8.40063e-23	Down	Yes
AKAP8L	283.008	1886.05	-2.73645	6.09345e-27	1.99606e-25	Down	No
AKIRIN1	46.9766	99.3848	-1.08108	0.00561001	0.0128773	Down	No
ALAD	26.0183	165.164	-2.6663	0.00231538	0.00575697	Down	Yes
ALCAM	196.819	782.873	-1.99191	6.44934e-12	5.21995e-11	Down	No
ALDH2	44.5029	629.416	-3.82204	3.52019e-24	9.09609e-23	Down	Yes
ALDH3A2	12.7801	104.65	-3.03359	3.39001e-08	1.76509e-07	Down	No
ALDH5A1	8.47122	43.5621	-2.36243	0.000314424	0.000914733	Down	No
ALDH8A1	2.17772	15.6558	-2.84581	0.0209093	0.0418206	Down	No
ALDOA	21.0143	211.354	-3.33022	3.61665e-07	1.63721e-06	Down	Yes
ALG1	5.78751	52.0807	-3.16973	8.92406e-06	3.31599e-05	Down	No
ALG11	71.7114	384.697	-2.42345	2.67068e-19	4.66048e-18	Down	Yes
ALG13	648.855	1312.91	-1.0168	2.72084e-06	1.08651e-05	Down	No
ALG2	77.2933	301.147	-1.96205	1.58029e-08	8.56477e-08	Down	Yes
ALG5	258.608	622.843	-1.2681	1.46124e-05	5.23967e-05	Down	No
ALKAL1	4.7544	91.0653	-4.25957	4.33573e-12	3.58172e-11	Down	No
ALKAL2	0.278471	26.422	-6.56807	5.24953e-05	0.000172887	Down	No
ALKBH1	86.4405	498.358	-2.5274	8.9517e-25	2.45328e-23	Down	Yes
ALKBH6	4.77904	34.217	-2.83992	0.0136403	0.0286136	Down	No
ALKBH7	152.638	399.681	-1.38873	0.00189612	0.0047912	Down	Yes
ALYREF	149.515	356.927	-1.25533	2.36785e-05	8.22264e-05	Down	Yes
AMDHD2	2.68806	43.2487	-4.00802	0.0163143	0.0335628	Down	No
AMOTL1	6.98333	45.3111	-2.69788	0.00672229	0.0151479	Down	No
AMPD1	8.17119	36.0707	-2.14221	0.00137344	0.00356488	Down	No
AMT	135.841	1375.04	-3.33949	3.52183e-08	1.82733e-07	Down	Yes
AMTN	1.31678	214.77	-7.34964	9.70977e-20	1.75836e-18	Down	No
ANAPC10	260.466	703.099	-1.43263	8.54163e-11	6.02286e-10	Down	Yes
ANAPC2	1.58117	39.764	-4.6524	1.25364e-06	5.27447e-06	Down	No
ANAPC5	54.2632	138.307	-1.34983	0.000177992	0.000537596	Down	Yes
ANG	227.249	682.97	-1.58755	9.35861e-09	5.20782e-08	Down	No
ANGPT1	167.774	564.939	-1.75158	2.69449e-15	3.13468e-14	Down	Yes
ANGPT2	71.5657	334.753	-2.22576	4.05181e-12	3.35383e-11	Down	Yes
ANKAR	5.36056	50.2314	-3.22813	3.59383e-08	1.86144e-07	Down	No
ANKRD11	24.327	103.871	-2.09416	4.79094e-05	0.000158714	Down	No
ANKRD33B	78.1626	449.775	-2.52465	4.96484e-09	2.85839e-08	Down	Yes
ANKRD34B	2.58941	22.3951	-3.11249	0.0210882	0.0421419	Down	No
ANKRD46	84.0397	604.851	-2.84744	3.45161e-14	3.57732e-13	Down	Yes
ANKRD54	16.3949	48.791	-1.57337	0.00826234	0.0182486	Down	No
ANKS3	2.01314	14.5548	-2.85397	0.0106822	0.0230306	Down	No
ANP32E	510.374	2961.05	-2.53648	1.48746e-22	3.39633e-21	Down	Yes
ANXA3	0.471312	15.0554	-4.99746	0.00196967	0.00496317	Down	No
ANXA4	102.82	530.726	-2.36785	0.014631	0.0304491	Down	No
AOC2	0.178554	12.5858	-6.1393	0.00048045	0.00135235	Down	No
AP1M2	49.1538	151.686	-1.62571	0.00162574	0.00415857	Down	Yes
AP1S2	1076.2	4136.11	-1.94233	6.56547e-16	8.16309e-15	Down	Yes
AP1S3	7.24511	53.0237	-2.87156	0.000420603	0.00119587	Down	No
AP2A2	16.7761	128.706	-2.9396	8.63334e-08	4.25651e-07	Down	No
AP2B1	976.677	2141.89	-1.13293	5.39921e-08	2.73791e-07	Down	Yes
AP3S2	27.4253	147.591	-2.42803	1.54815e-05	5.52178e-05	Down	Yes
APBB3	8.62501	556.93	-6.01283	2.00389e-23	4.8809e-22	Down	No
APEH	14.9244	131.105	-3.13498	9.25768e-05	0.000293148	Down	No
API5	405.849	2645.48	-2.70451	1.22722e-27	4.22641e-26	Down	Yes
APOBEC3B	0.337233	9.721	-4.84929	0.00785886	0.0174668	Down	No
APOF	10.0103	40.3074	-2.00956	0.00676145	0.0152279	Down	Yes
APOPT1	11.5091	247.149	-4.42454	4.81643e-13	4.41545e-12	Down	Yes
APP	64.2291	204.405	-1.67013	0.000267264	0.000785774	Down	No
APRT	1.95963	187.225	-6.57804	1.86722e-05	6.58866e-05	Down	Yes
AREG	1.97877	94.2689	-5.57411	8.61428e-09	4.80906e-08	Down	No
ARF2	23.4383	158.001	-2.75299	1.49417e-07	7.15127e-07	Down	Yes
ARFIP2	4.12816	25.9125	-2.65008	0.0139421	0.0291796	Down	Yes
ARFRP1	0.503479	15.2075	-4.9167	0.00352738	0.00845311	Down	No
ARG1	229.82	4893.99	-4.41244	1.10764e-06	4.69628e-06	Down	Yes
ARG2	268.136	746.674	-1.47751	1.59734e-08	8.64817e-08	Down	Yes
ARGFX	33.1033	973.894	-4.87872	5.44273e-07	2.40064e-06	Down	Yes
ARGLU1	131.828	991.063	-2.91032	8.1669e-27	2.6338e-25	Down	Yes
ARHGAP17	20.2504	93.9087	-2.21331	4.84878e-06	1.87158e-05	Down	No
ARHGAP28	59.6953	174.595	-1.54832	0.000531278	0.00148437	Down	No
ARHGAP36	1.62277	26.3094	-4.01905	0.0103633	0.0223967	Down	No
ARHGAP5	1138.87	4285.88	-1.91199	1.03692e-13	1.0187e-12	Down	Yes
ARID3C	170.665	375.833	-1.13892	0.000154567	0.000471014	Down	No
ARID5A	1.09158	14.4582	-3.7274	0.00677369	0.0152522	Down	No
ARL16	7.70421	57.7013	-2.90489	0.000198024	0.000594275	Down	No
ARL5B	877.596	2988.29	-1.76769	2.8595e-10	1.89973e-09	Down	Yes
ARL6	283.122	1451.63	-2.35818	1.18444e-20	2.30473e-19	Down	Yes
ARL6IP5	121.4	345.885	-1.51052	0.0174366	0.0355449	Down	No
ARMC7	242.916	1115.33	-2.19894	1.10256e-11	8.67084e-11	Down	Yes
ARMC9	9.00744	57.799	-2.68185	1.15807e-07	5.63487e-07	Down	No
ARMCX1	11.5526	84.8865	-2.87732	1.94931e-05	6.85161e-05	Down	No
ARMCX2	0.265995	12.2091	-5.52042	0.00238729	0.00591729	Down	No
ARMCX4	10.0557	114.096	-3.50417	5.54549e-09	3.16639e-08	Down	No
ARPC3	482.187	5833.75	-3.59676	3.03857e-32	1.46648e-30	Down	Yes
ARPC5L	123.809	686.846	-2.47187	2.69971e-16	3.53409e-15	Down	Yes
ARPP19	2359.21	5745.78	-1.2842	7.49933e-11	5.32815e-10	Down	Yes
ARRDC2	101.06	373.843	-1.88722	3.14576e-08	1.64492e-07	Down	Yes
ARRDC4	47.4854	214.388	-2.17467	4.44278e-06	1.72383e-05	Down	No
ASB1	10.561	41.3645	-1.96965	0.00141876	0.003677	Down	No
ASB6	6.80446	27.0781	-1.99258	0.00717386	0.0160853	Down	Yes
ASCC2	11.4745	73.4552	-2.67844	2.97587e-05	0.000101778	Down	No
ASCC3	573.72	1232.32	-1.10296	5.51827e-06	2.11042e-05	Down	Yes
ASCL1	3.03737	32.5021	-3.41964	0.000401222	0.00114577	Down	No
ASIC3	11.6306	62.3256	-2.4219	0.00543535	0.0125012	Down	No
ASL	2.22146	116.176	-5.70866	2.79595e-11	2.10187e-10	Down	Yes
ASNA1	14.6951	98.4813	-2.74452	0.00209352	0.00524981	Down	Yes
ASNSD1	31.7236	951.371	-4.90638	7.2012e-92	7.48961e-89	Down	Yes
ASPG	4.52719	109.33	-4.59393	0.00418799	0.00987355	Down	No
ASPN	5.96514	41.1258	-2.78541	0.000134462	0.000413722	Down	No
ASS1	6.37521	788.323	-6.95017	2.78663e-06	1.11128e-05	Down	No
ASXL1	44.6129	239.517	-2.42459	6.24783e-12	5.06869e-11	Down	No
ASXL2	219.164	626.791	-1.51597	2.51907e-07	1.16989e-06	Down	No
ASZ1	162.476	493.119	-1.60171	1.83294e-09	1.11028e-08	Down	Yes
ATAD1	697.08	2492.41	-1.83815	1.30832e-32	6.40336e-31	Down	Yes
ATAD2B	475.11	2305.49	-2.27874	2.76298e-19	4.81346e-18	Down	Yes
ATAD5	263.38	1344.99	-2.35237	7.38737e-22	1.60234e-20	Down	No
ATF1	394.561	4385.33	-3.47437	3.17017e-26	9.69746e-25	Down	Yes
ATF3	8.25421	525.174	-5.99152	8.29927e-13	7.39012e-12	Down	Yes
ATF4	531.062	1195.41	-1.17055	7.17052e-06	2.70011e-05	Down	Yes
ATF7IP2	438.241	902.992	-1.04299	0.00251519	0.00620402	Down	Yes
ATG101	31.06	349.33	-3.49146	5.15982e-31	2.30816e-29	Down	Yes
ATG2A	0.964432	36.7475	-5.25182	1.4772e-06	6.16024e-06	Down	No
ATG3	238.562	1201.63	-2.33255	1.64287e-24	4.39245e-23	Down	Yes
ATG4B	5.34769	123.766	-4.53255	8.73623e-13	7.75928e-12	Down	Yes
ATG4D	24.3631	69.8788	-1.52015	0.00612921	0.0139459	Down	No
ATG9B	2.76164	69.6451	-4.65642	1.95963e-09	1.18358e-08	Down	No
ATOH1	0.0698978	12.3159	-7.46106	4.73739e-05	0.00015709	Down	No
ATP11A	35.6383	204.787	-2.52263	4.84983e-07	2.15328e-06	Down	No
ATP11B	257.278	1735.31	-2.75379	6.44316e-30	2.63309e-28	Down	No
ATP12A	0.840362	22.9506	-4.77138	0.00400597	0.00948636	Down	No
ATP13A4	10.4273	43.0881	-2.04693	0.00767178	0.0170876	Down	No
ATP1B3	321.827	11038.9	-5.10016	4.90254e-103	3.39926e-99	Down	Yes
ATP5A1	5894.34	11937.2	-1.01806	1.94168e-08	1.04122e-07	Down	Yes
ATP5B	1081.39	13289.9	-3.61937	2.30921e-99	4.80339e-96	Down	Yes
ATP5C1	1946.16	7764.33	-1.99623	1.93538e-24	5.16127e-23	Down	Yes
ATP5D	62.5588	377.994	-2.59508	0.00117385	0.00309197	Down	Yes
ATP5E	2747.6	12543.5	-2.1907	6.29047e-25	1.76583e-23	Down	Yes
ATP5G1	2798.69	8864.24	-1.66325	5.14613e-08	2.61723e-07	Down	Yes
ATP5H	405.491	19858.9	-5.61397	8.59216e-91	8.51074e-88	Down	Yes
ATP5J	3341.91	36518.9	-3.4499	1.06869e-29	4.2832e-28	Down	Yes
ATP5O	5382.13	25262.3	-2.23074	2.98011e-26	9.14297e-25	Down	Yes
ATP5S	118.899	445.075	-1.90431	4.85523e-06	1.87372e-05	Down	No
ATP5SL	47.7238	154.825	-1.69785	0.000207395	0.0006209	Down	Yes
ATP6AP1	145.788	412.741	-1.50136	0.000562373	0.00156389	Down	No
ATP6V0E1	2590.29	7009.47	-1.43619	1.24918e-07	6.04424e-07	Down	Yes
ATP6V1B2	1508.46	3030.81	-1.00662	7.71975e-06	2.89018e-05	Down	Yes
ATP6V1C2	499.306	1167.11	-1.22494	2.63676e-07	1.21964e-06	Down	Yes
ATP6V1E1	585.951	3214.93	-2.45594	1.1047e-34	6.09518e-33	Down	Yes
ATP6V1F	421.394	1260.03	-1.58021	1.16196e-06	4.91061e-06	Down	Yes
ATP7A	130.711	349.861	-1.4204	1.66609e-07	7.91241e-07	Down	No
ATP8B2	3.63388	61.8571	-4.08936	7.38256e-10	4.68185e-09	Down	No
ATP8B3	2.00954	26.8082	-3.73774	0.00124179	0.00324707	Down	No
ATPAF2	8.45242	163.065	-4.26994	2.64487e-17	3.86077e-16	Down	Yes
ATRAID	270.924	816.572	-1.5917	3.48757e-08	1.81091e-07	Down	Yes
ATXN7	327.231	1616.36	-2.30437	6.52371e-24	1.65689e-22	Down	No
ATXN7L3	13.0518	132.348	-3.34202	3.07136e-13	2.86491e-12	Down	No
AVIL	57.1037	235.768	-2.04571	9.17086e-07	3.93326e-06	Down	Yes
AVPI1	31.1323	200.132	-2.68447	5.18011e-09	2.97492e-08	Down	Yes
AZI2	176.225	610.776	-1.79323	7.71863e-12	6.19145e-11	Down	No
B3GNT2	297.09	3926.64	-3.72432	1.44838e-55	2.64278e-53	Down	Yes
B3GNT6	0.540985	16.5544	-4.93549	0.00457889	0.0107005	Down	No
B3GNT9	77.0032	251.871	-1.7097	1.14418e-10	7.95461e-10	Down	No
B4GALT1	81.3394	164.28	-1.01413	0.00526835	0.0121534	Down	No
B9D1	0.125556	44.2092	-8.45988	3.22844e-07	1.47463e-06	Down	No
B9D2	5.53437	33.7358	-2.60779	0.00918711	0.0200673	Down	Yes
BAD	3.99695	242.276	-5.92161	1.47196e-12	1.27682e-11	Down	Yes
BAG1	287.087	669.345	-1.22126	4.41208e-06	1.71287e-05	Down	Yes
BAG2	44.9794	111.399	-1.3084	0.00623802	0.0141533	Down	No
BAG5	9.47475	104.246	-3.45977	1.36833e-10	9.44347e-10	Down	No
BAHD1	7.67905	201.703	-4.71516	1.54256e-16	2.07146e-15	Down	No
BAIAP3	1.625	39.2081	-4.59264	0.0027017	0.00662401	Down	No
BAK1	5.63864	41.1146	-2.86623	0.000913538	0.00245637	Down	Yes
BAMBI	4.30058	74.4897	-4.11444	1.05839e-09	6.58162e-09	Down	No
BASP1	241.74	2192.94	-3.18134	1.21579e-24	3.29723e-23	Down	Yes
BATF3	0.791812	17.9575	-4.50328	0.0101469	0.0219632	Down	No
BAZ2A	425.125	874.738	-1.04096	4.39329e-05	0.00014638	Down	Yes
BBS10	8.7046	39.5832	-2.18504	0.000833479	0.00225568	Down	No
BCAP31	145.456	767.707	-2.39997	1.47731e-17	2.21394e-16	Down	Yes
BCAS2	2027.12	6572.52	-1.69702	9.35578e-13	8.27773e-12	Down	Yes
BCAS3	220.941	1741.61	-2.97869	8.93708e-42	7.06845e-40	Down	Yes
BCAT1	58.3096	3855.84	-6.04717	7.7709e-34	4.06137e-32	Down	No
BCCIP	269.558	1019.13	-1.91867	6.10633e-16	7.65167e-15	Down	Yes
BCDIN3D	20.1374	226.945	-3.49439	1.33659e-22	3.05522e-21	Down	Yes
BCKDHA	37.9601	126.07	-1.73168	1.57363e-05	5.60595e-05	Down	Yes
BCKDK	188.549	425.278	-1.17346	0.000217307	0.000648615	Down	Yes
BCL2L11	20.645	104.36	-2.3377	2.43772e-05	8.43569e-05	Down	No
BCL2L12	5.96361	42.4557	-2.8317	0.0020922	0.00524715	Down	No
BCL2L15	37.6317	216.502	-2.52436	1.14177e-08	6.28804e-08	Down	Yes
BCL6B	2.87417	28.4433	-3.30687	0.000569928	0.00158363	Down	No
BCL7B	84.7264	205.628	-1.27915	0.000826586	0.00223849	Down	Yes
BCLAF1	1975.04	10332.3	-2.38721	1.07519e-28	3.97246e-27	Down	Yes
BCOR	12.5827	407.847	-5.01851	8.76066e-25	2.40727e-23	Down	No
BDH1	35.5015	237.604	-2.74261	1.89697e-06	7.77975e-06	Down	Yes
BDH2	20.9041	215.498	-3.36581	0.000298175	0.000870383	Down	No
BDP1	733.913	3062.04	-2.06081	1.5913e-20	3.07913e-19	Down	Yes
BECN2	125.336	830.136	-2.72755	4.75108e-19	8.10724e-18	Down	Yes
BEND4	16.202	48.3205	-1.57646	0.00219013	0.00547177	Down	No
BEND6	1.34484	10.9991	-3.03188	0.0183992	0.0372878	Down	No
BET1	262.102	1276.68	-2.2842	9.93155e-18	1.50793e-16	Down	Yes
BET1L	34.7119	251.46	-2.85683	3.99494e-14	4.11177e-13	Down	Yes
BEX1	67.878	218.532	-1.68683	9.51952e-06	3.52028e-05	Down	Yes
BEX4	2539.42	17491.5	-2.78408	8.82104e-10	5.53838e-09	Down	Yes
BHLHE22	6.78172	29.8243	-2.13676	0.00876782	0.0192343	Down	Yes
BHLHE40	6.309	29.7103	-2.23548	0.0206128	0.041307	Down	No
BICD2	153.676	504.622	-1.71531	8.6446e-10	5.4358e-09	Down	No
BICRAL	45.677	98.0835	-1.10254	0.0039783	0.00943049	Down	No
BID	3.72799	477.283	-7.0003	2.14538e-29	8.34132e-28	Down	Yes
BIN1	6.14346	121.224	-4.30248	5.43002e-07	2.39554e-06	Down	Yes
BLOC1S2	119.67	3413.38	-4.83406	8.92181e-51	1.27111e-48	Down	Yes
BLOC1S4	3.09279	37.513	-3.60041	0.000104848	0.000328554	Down	No
BLOC1S5	30.1169	75.3642	-1.3233	0.000377222	0.00108363	Down	No
BLVRB	9.48238	1360.07	-7.16422	4.56384e-11	3.34505e-10	Down	Yes
BMI1	11.1999	596.578	-5.73516	3.67191e-31	1.65324e-29	Down	No
BMP4	131.415	583.401	-2.15036	1.36455e-14	1.47987e-13	Down	Yes
BMS1	617.493	1767.36	-1.5171	9.68576e-21	1.89711e-19	Down	Yes
BMT2	160.246	1252.09	-2.96598	6.16006e-25	1.73156e-23	Down	No
BNIP1	75.7243	267.359	-1.81995	4.08899e-09	2.3805e-08	Down	Yes
BNIP2	204.596	2504.3	-3.61355	3.36763e-53	5.51575e-51	Down	Yes
BOLA1	38.282	743.213	-4.27904	1.57331e-09	9.60848e-09	Down	Yes
BOLA2B	63.3663	1225.71	-4.27376	2.36812e-20	4.51921e-19	Down	Yes
BOLA3	377.536	2854.1	-2.91835	5.72582e-25	1.61167e-23	Down	Yes
BOP1	0.193907	63.7651	-8.36126	6.93281e-08	3.46574e-07	Down	No
BPIFA3	0.178516	60.8275	-8.41252	1.10404e-07	5.38963e-07	Down	Yes
BPIFB3	5.52772	36.5334	-2.72446	1.13144e-05	4.13623e-05	Down	Yes
BPIFB6	1.08368	23.9106	-4.46364	0.0083038	0.0183323	Down	No
BPTF	950.527	1961.7	-1.04531	9.44582e-07	4.04368e-06	Down	Yes
BRD2	250.71	505.785	-1.01251	6.71111e-05	0.000217374	Down	Yes
BRD9	48.6816	108.377	-1.15461	0.00178602	0.00453449	Down	Yes
BRDT	2392.07	9267.91	-1.95398	6.69183e-15	7.46364e-14	Down	Yes
BRF2	15.0961	144.065	-3.25447	9.00667e-15	9.93361e-14	Down	Yes
BRMS1L	184.384	428.544	-1.21673	7.36745e-08	3.66823e-07	Down	Yes
BRPF3	75.1701	482.077	-2.68103	3.71411e-17	5.35022e-16	Down	Yes
BSG	51.7181	283.289	-2.45353	1.02428e-08	5.67255e-08	Down	Yes
BTAF1	240.28	1259.87	-2.39049	1.11722e-34	6.14795e-33	Down	No
BTF3L4	762.086	2593.26	-1.76674	8.85405e-14	8.77015e-13	Down	Yes
BTG1	428.866	3071.96	-2.84056	1.007e-13	9.92256e-13	Down	No
BTG2	103.765	562.916	-2.43961	1.45848e-07	6.98868e-07	Down	Yes
BTG3	86.6416	2652.93	-4.93638	1.58595e-44	1.47934e-42	Down	Yes
BUD23	43.0665	1545.01	-5.1649	3.16355e-80	1.99409e-77	Down	Yes
BUD31	982.624	3236.19	-1.71959	1.55123e-15	1.85764e-14	Down	Yes
BYSL	27.8773	160.984	-2.52975	1.57407e-08	8.53549e-08	Down	Yes
BZW1	3333.99	8889.93	-1.41492	2.06666e-15	2.44253e-14	Down	Yes
BZW2	1179.53	2471.11	-1.06694	0.000136399	0.000419151	Down	Yes
C10H1orf115	71.668	288.628	-2.00981	7.44324e-05	0.000239004	Down	No
C12H17orf100	31.834	276.962	-3.12105	0.000248324	0.000733617	Down	No
C12H17orf75	53.344	238.463	-2.16036	1.72536e-07	8.18267e-07	Down	No
C13H21orf2	0.999548	8.83715	-3.14423	0.017384	0.0354409	Down	Yes
C13H21orf91	1106.44	2338.77	-1.07983	0.0035812	0.00856926	Down	No
C13H3orf14	8.27253	92.9629	-3.49025	9.26761e-06	3.432e-05	Down	Yes
C13H3orf62	0.199809	19.5807	-6.61466	6.11889e-05	0.000199528	Down	No
C13H3orf80	2.94667	66.6319	-4.49905	2.03933e-06	8.31929e-06	Down	No
C14H1orf131	85.1001	518.997	-2.60849	3.70529e-16	4.80147e-15	Down	Yes
C15H2orf66	0.0626429	5.35835	-6.4185	0.0082551	0.0182345	Down	No
C16H5orf51	544.923	2416.25	-2.14865	8.8869e-23	2.08406e-21	Down	Yes
C17H20orf194	123.937	323.944	-1.38614	6.05103e-06	2.30021e-05	Down	No
C17H20orf27	61.6017	426.364	-2.79104	4.46378e-14	4.57169e-13	Down	Yes
C1D	2088.43	7893.85	-1.91831	1.71536e-12	1.47687e-11	Down	Yes
C1GALT1	113.691	2377.93	-4.38652	4.20928e-46	4.37786e-44	Down	Yes
C1H14orf105	0.832892	8.9841	-3.43117	0.0245686	0.048226	Down	No
C1H14orf28	280.27	585.728	-1.06341	1.93214e-05	6.79812e-05	Down	No
C1H18orf54	23.4952	345.773	-3.87938	8.47676e-27	2.72107e-25	Down	No
C1H6orf163	5.78393	36.2507	-2.64789	0.00375275	0.00894066	Down	Yes
C1H6orf203	558.672	2897.77	-2.37487	9.69436e-28	3.36648e-26	Down	Yes
C1H9orf152	0.123527	7.27419	-5.87989	0.00854198	0.0187943	Down	No
C1H9orf16	14.4916	110.04	-2.92475	9.29315e-05	0.000294227	Down	No
C1QBP	495.241	3791.92	-2.93673	4.91799e-46	5.03936e-44	Down	Yes
C1QL4	0.156822	11.3168	-6.17319	0.000635576	0.00175433	Down	No
C1QTNF2	0.958259	20.1074	-4.39116	0.000835847	0.0022618	Down	Yes
C2H11orf58	1157.99	5127.61	-2.14667	2.48186e-24	6.55141e-23	Down	Yes
C2H11orf95	186.414	946.436	-2.34399	2.35008e-17	3.45226e-16	Down	No
C2H19orf24	1.46326	51.6571	-5.14171	0.000571041	0.00158651	Down	No
C2H19orf25	7.64453	43.6464	-2.51336	0.000567916	0.00157867	Down	Yes
C2H19orf43	20.6213	191.376	-3.21421	1.09713e-14	1.19923e-13	Down	No
C2H19orf53	52.6637	1163.04	-4.46495	1.20681e-31	5.61587e-30	Down	Yes
C2H19orf60	55.7577	207.845	-1.89826	9.11763e-05	0.000289109	Down	Yes
C2H19orf70	494.378	2195.43	-2.15082	2.8099e-17	4.09019e-16	Down	No
C2H5orf30	28.1181	271.535	-3.27157	2.29874e-19	4.03171e-18	Down	Yes
C3H16orf52	40.8093	237.659	-2.54192	5.35689e-08	2.71843e-07	Down	No
C3H16orf59	0.477897	14.7094	-4.9439	0.00224755	0.00560164	Down	Yes
C3H16orf91	0.640201	224.546	-8.45427	1.20926e-08	6.65093e-08	Down	Yes
C3H2orf49	88.7733	540.991	-2.60741	1.08968e-15	1.32321e-14	Down	Yes
C3H2orf68	14.2758	99.9625	-2.80782	0.000108396	0.000338804	Down	No
C3H7orf50	1.21616	50.3981	-5.37297	0.000577271	0.00160168	Down	Yes
C4H1orf52	77.7911	712.083	-3.19437	2.04944e-39	1.45002e-37	Down	Yes
C4H8orf33	7.44409	187.191	-4.65227	1.53525e-17	2.29912e-16	Down	Yes
C4H8orf46	29.0808	301.837	-3.37563	1.36711e-26	4.30867e-25	Down	Yes
C4H8orf59	189.313	3824.58	-4.33646	2.34806e-45	2.27172e-43	Down	Yes
C4H8orf88	63.2451	261.819	-2.04954	2.71079e-07	1.2511e-06	Down	Yes
C5H12orf10	4.36754	70.4551	-4.01181	1.49482e-07	7.15127e-07	Down	Yes
C5H12orf29	85.1227	500.631	-2.55613	1.22039e-18	2.00834e-17	Down	Yes
C5H12orf45	454.161	3576.16	-2.97714	1.68133e-27	5.7522e-26	Down	Yes
C5H12orf57	23.0717	136.789	-2.56776	4.82585e-06	1.86342e-05	Down	Yes
C5H12orf75	17.8954	261.086	-3.86687	1.54439e-09	9.44293e-09	Down	Yes
C5H22orf23	0.680723	64.483	-6.56571	4.35131e-09	2.51981e-08	Down	No
C6	4.47284	26.1172	-2.54574	0.00587418	0.0134185	Down	No
C6H18orf21	15.3439	967.007	-5.97779	9.18207e-47	9.99981e-45	Down	Yes
C6H1orf109	20.736	271.475	-3.71061	1.63919e-27	5.61725e-26	Down	Yes
C6H1orf123	147.91	364.778	-1.3023	0.000145732	0.000446053	Down	Yes
C7H15orf39	24.8664	125.937	-2.34043	5.89295e-05	0.000192553	Down	Yes
C7H15orf40	25.9347	427.383	-4.04257	1.21895e-23	3.03656e-22	Down	Yes
C7H6orf125	305.475	817.683	-1.42049	1.81505e-06	7.46883e-06	Down	No
C7H6orf62	1749.81	4108.63	-1.23146	1.2407e-05	4.50162e-05	Down	Yes
C7H6orf89	259.284	576.101	-1.15179	4.69538e-06	1.81709e-05	Down	Yes
C8H4orf32	4.8088	115.538	-4.58654	4.82427e-07	2.14377e-06	Down	No
C8H4orf48	1.52963	108.845	-6.15295	5.61592e-05	0.000184108	Down	No
C9H11orf63	1.64578	12.5118	-2.92645	0.016844	0.034499	Down	No
C9H1orf74	11.1535	115.288	-3.36967	1.4113e-10	9.71746e-10	Down	Yes
CA3	0.0937028	132.909	-10.4701	4.06488e-12	3.36331e-11	Down	Yes
CA4	0.936651	27.896	-4.8964	0.0044531	0.0104347	Down	No
CA5B	0.323714	14.4633	-5.48154	0.00156396	0.0040153	Down	No
CA8	3.82217	95.7505	-4.64681	1.41814e-12	1.23271e-11	Down	No
CABIN1	34.9721	84.9147	-1.27981	0.00505532	0.0117035	Down	No
CABP7	166.961	838.668	-2.32859	3.30098e-29	1.26686e-27	Down	No
CACTIN	7.00882	68.8585	-3.29639	2.6723e-08	1.40618e-07	Down	Yes
CACYBP	614.565	4551.32	-2.88865	4.19044e-43	3.55777e-41	Down	Yes
CAD	1.5586	54.6622	-5.13223	5.5862e-11	4.03467e-10	Down	No
CADM1	1.7935	56.8619	-4.98661	4.2453e-08	2.18256e-07	Down	No
CALM3	143.758	901.794	-2.64916	9.68695e-17	1.3309e-15	Down	Yes
CALR	1472.19	3877.17	-1.39704	0.00799588	0.0177278	Down	Yes
CAMKMT	70.8048	418.119	-2.56199	4.71595e-22	1.04136e-20	Down	Yes
CAMLG	289.137	705.992	-1.2879	1.9094e-05	6.72606e-05	Down	No
CAMSAP2	14.3997	102.004	-2.82452	7.07579e-08	3.53127e-07	Down	No
CAMTA1	403.536	1085.18	-1.42717	2.39725e-11	1.81262e-10	Down	No
CANX	1439.09	5493.82	-1.93265	6.2563e-16	7.81605e-15	Down	Yes
CAPZA2	185.861	1615.78	-3.11993	3.00543e-19	5.21837e-18	Down	Yes
CARHSP1	41.872	502.632	-3.58545	5.41172e-20	1.00419e-18	Down	Yes
CARNMT1	308.412	817.802	-1.40689	2.858e-06	1.13735e-05	Down	No
CARS	17.4217	201.232	-3.5299	2.42794e-06	9.78722e-06	Down	No
CASC4	94.6381	217.482	-1.2004	4.85096e-05	0.000160549	Down	No
CASP3	710.877	2194.61	-1.62629	1.27545e-08	6.98544e-08	Down	Yes
CASP6	63.7213	458.534	-2.84718	6.14784e-23	1.45319e-21	Down	Yes
CASP8	7.33258	60.2831	-3.03936	0.000159001	0.000484171	Down	No
CATSPERE	5.76944	64.6578	-3.48632	6.84687e-05	0.000221393	Down	No
CATSPERZ	0.681703	29.512	-5.43601	0.00118149	0.00310934	Down	No
CBL	199.721	1226.74	-2.61878	7.36959e-16	9.09761e-15	Down	No
CBLN2	5.13063	50.3983	-3.29617	2.42834e-06	9.78722e-06	Down	No
CBX2	0.168332	18.5903	-6.78709	4.76194e-05	0.000157778	Down	No
CBX4	4.58823	227.021	-5.62874	9.1312e-20	1.66175e-18	Down	No
CCDC107	4.9353	52.282	-3.40511	0.000366633	0.00105496	Down	No
CCDC12	127.886	321.02	-1.3278	1.03706e-06	4.41684e-06	Down	Yes
CCDC134	18.2933	77.8073	-2.08859	0.00012497	0.000386717	Down	Yes
CCDC137	4.29952	25.2461	-2.55382	0.00271377	0.00665046	Down	No
CCDC138	14.3952	70.666	-2.29543	4.17598e-05	0.000139564	Down	No
CCDC142	301.874	1254.11	-2.05464	2.0817e-16	2.7563e-15	Down	No
CCDC153	8.15539	24.9962	-1.61588	0.015393	0.0318471	Down	No
CCDC167	158.358	379.299	-1.26014	1.09172e-05	3.99803e-05	Down	Yes
CCDC168	20.311	51.6233	-1.34576	0.0246196	0.0482988	Down	No
CCDC174	199.722	1453.34	-2.86331	7.47154e-19	1.25234e-17	Down	Yes
CCDC177	1.6046	13.3749	-3.05925	0.00548198	0.0126007	Down	No
CCDC189	0.0866197	26.6772	-8.2667	1.52558e-06	6.34798e-06	Down	Yes
CCDC28A	302.741	968.036	-1.67698	7.64202e-12	6.13515e-11	Down	Yes
CCDC38	363.177	1278.64	-1.81586	1.15531e-08	6.35756e-08	Down	No
CCDC39	332.042	873.394	-1.39527	3.33562e-07	1.52058e-06	Down	No
CCDC47	139.526	1207.15	-3.113	7.12931e-41	5.41229e-39	Down	Yes
CCDC51	17.553	360.813	-4.36146	2.81591e-30	1.17855e-28	Down	Yes
CCDC58	522.119	5926.91	-3.50483	5.41847e-46	5.47133e-44	Down	Yes
CCDC59	788.54	2132.34	-1.43518	6.01278e-12	4.89518e-11	Down	Yes
CCDC68	222.84	1158.62	-2.37832	4.6314e-08	2.36993e-07	Down	No
CCDC80	6.68454	35.4564	-2.40715	0.0208707	0.0417594	Down	No
CCDC84	50.5115	1295.38	-4.68062	8.02954e-40	5.7396e-38	Down	Yes
CCDC86	20.1453	164.826	-3.03243	6.13424e-15	6.85644e-14	Down	Yes
CCHCR1	3.45049	29.5265	-3.09714	0.00321714	0.00777685	Down	No
CCL2	5.96893	56.51	-3.24296	0.00713937	0.0160183	Down	No
CCNA2	1134.8	3059.46	-1.43083	2.2434e-08	1.19195e-07	Down	No
CCNC	84.8488	1785.04	-4.39492	5.11961e-61	1.15753e-58	Down	Yes
CCND2	3.51127	112.466	-5.00135	2.0709e-14	2.1922e-13	Down	Yes
CCNDBP1	88.8542	776.333	-3.12716	1.54632e-24	4.15034e-23	Down	Yes
CCNE2	48.6538	201.245	-2.04833	1.01767e-11	8.03669e-11	Down	No
CCNF	10.6219	77.2299	-2.86212	2.1235e-06	8.63894e-06	Down	No
CCNL1	484.698	1196.27	-1.30339	9.23778e-06	3.42156e-05	Down	Yes
CCNL2	70.9878	312.227	-2.13695	4.41216e-11	3.24073e-10	Down	No
CCNT1	964.527	2125.46	-1.13988	4.46144e-12	3.68126e-11	Down	Yes
CCNT2	313.885	1260.48	-2.00566	1.41165e-31	6.52527e-30	Down	No
CCR4	1.6283	67.6638	-5.37694	7.1328e-08	3.55802e-07	Down	No
CCT4	414.282	2643.41	-2.67372	2.73424e-22	6.16196e-21	Down	Yes
CCT6A	905.262	4473.36	-2.30495	4.17995e-28	1.47618e-26	Down	Yes
CD1.1	1.72249	29.4977	-4.09804	0.00180414	0.00457768	Down	No
CD200	1.20495	24.9093	-4.36964	0.000952766	0.00255097	Down	No
CD200R1	62.75	534.401	-3.09024	1.04415e-11	8.22703e-11	Down	Yes
CD320	41.1845	116.027	-1.49428	0.00586157	0.0133941	Down	Yes
CD36	1271.02	5806.65	-2.19172	0.000372224	0.00107002	Down	No
CD44	2.60674	46.0331	-4.14235	1.14466e-06	4.84633e-06	Down	No
CD53	0.630157	24.7745	-5.297	0.00118179	0.00310974	Down	Yes
CD63	1280.97	2979.61	-1.21789	4.70256e-05	0.000156059	Down	Yes
CD68	2.04772	15.4024	-2.91107	0.00829752	0.0183204	Down	No
CD82	0.839517	20.2111	-4.58945	0.00664538	0.0149892	Down	No
CD86	5.98442	2765.57	-8.85215	1.78713e-18	2.90877e-17	Down	Yes
CD9	9.67089	8259.65	-9.73822	1.21474e-08	6.67649e-08	Down	Yes
CDA	109.437	610.213	-2.47921	8.96227e-11	6.3045e-10	Down	Yes
CDADC1	378.347	857.463	-1.18036	3.75977e-07	1.6972e-06	Down	Yes
CDAN1	23.2231	70.1392	-1.59466	0.0005385	0.00150132	Down	No
CDC14A	19.8014	108.463	-2.45352	3.74378e-06	1.46694e-05	Down	No
CDC14B	44.9964	150.832	-1.74506	9.1495e-06	3.39008e-05	Down	No
CDC23	35.6014	265.237	-2.89727	1.23533e-15	1.4957e-14	Down	Yes
CDC26	5032.57	48666.4	-3.27356	3.15929e-23	7.59727e-22	Down	Yes
CDC37	24.647	210.699	-3.0957	3.84158e-13	3.5515e-12	Down	Yes
CDC37L1	335.48	913.671	-1.44545	8.82372e-08	4.34728e-07	Down	No
CDC42BPB	17.2035	53.9798	-1.64972	0.0236192	0.0465646	Down	No
CDC42EP1	0.815081	45.1458	-5.7915	0.000533951	0.00149004	Down	No
CDC42EP3	117.41	503.669	-2.10092	1.2337e-06	5.20006e-06	Down	Yes
CDC42EP4	3.41425	85.117	-4.63981	8.59795e-15	9.49634e-14	Down	Yes
CDCA5	32.6049	270.392	-3.0519	5.58978e-22	1.22264e-20	Down	Yes
CDIP1	25.0016	74.8823	-1.58261	0.000942159	0.00252615	Down	Yes
CDK1	1339.25	8302.84	-2.63218	4.64519e-32	2.22126e-30	Down	Yes
CDK12	302.768	715.266	-1.24027	9.80188e-10	6.11912e-09	Down	Yes
CDK16	37.2287	132.686	-1.83353	0.000631438	0.0017441	Down	Yes
CDK17	524.934	1260.91	-1.26426	3.44954e-06	1.35872e-05	Down	No
CDK20	11.6065	109.82	-3.24213	1.38262e-10	9.53258e-10	Down	Yes
CDK5RAP1	46.6519	439.915	-3.23722	2.74816e-24	7.20863e-23	Down	Yes
CDK5RAP3	12.2104	70.7042	-2.53369	7.24625e-05	0.000233327	Down	No
CDK7	758.088	2652.59	-1.80697	5.19302e-09	2.97986e-08	Down	Yes
CDKN1C	10.8407	55.2401	-2.34925	0.00320063	0.00774233	Down	No
CDPF1	5.57974	72.6933	-3.70355	1.71972e-09	1.04535e-08	Down	Yes
CDT1	3.34427	23.7982	-2.83109	0.00269946	0.00662008	Down	No
CDV3	1310.75	18566.9	-3.82427	1.20161e-24	3.26301e-23	Down	Yes
CEBPD	1.13321	92.0851	-6.34448	9.45219e-09	5.25849e-08	Down	No
CEBPG	225.958	680.586	-1.59072	4.7013e-11	3.43491e-10	Down	Yes
CEBPZ	1635.38	4042.16	-1.3055	1.26906e-13	1.23412e-12	Down	Yes
CELF4	2.99782	20.425	-2.76835	0.00531797	0.0122624	Down	No
CEMIP	3.76008	59.2052	-3.97689	0.0177161	0.0360579	Down	No
CENPC	476.567	1090.15	-1.19378	7.06117e-10	4.49035e-09	Down	No
CENPP	148.768	461.7	-1.6339	1.31459e-08	7.18656e-08	Down	Yes
CENPT	24.3081	68.7449	-1.49981	0.000905908	0.00243712	Down	Yes
CENPX	0.359362	110.261	-8.26127	7.73233e-08	3.83867e-07	Down	Yes
CEP104	42.4814	167.915	-1.98283	1.92937e-10	1.30726e-09	Down	No
CEP112	41.0652	204.972	-2.31944	1.31817e-08	7.20423e-08	Down	Yes
CEP19	63.2832	276.882	-2.12937	1.34375e-15	1.62225e-14	Down	Yes
CEP41	12.7295	72.1163	-2.50214	5.4827e-06	2.09951e-05	Down	No
CEP76	58.4205	182.202	-1.64099	2.46217e-08	1.30088e-07	Down	No
CEP85L	172.138	1881.3	-3.45009	1.72485e-48	2.17446e-46	Down	Yes
CFAP126	15.995	73.4706	-2.19954	0.000592813	0.00164393	Down	No
CFAP157	6.87616	37.8582	-2.46093	0.00365676	0.008738	Down	No
CFAP20	551.677	3474.31	-2.65483	3.14302e-27	1.04772e-25	Down	Yes
CFAP36	71.9097	189.164	-1.39538	5.10501e-05	0.000168368	Down	Yes
CGRRF1	138.121	744.246	-2.42985	1.52812e-14	1.64526e-13	Down	Yes
CHCHD1	397.575	2502.49	-2.65406	6.16153e-31	2.73859e-29	Down	Yes
CHCHD10	1.23096	99.1734	-6.3321	8.64599e-05	0.000275119	Down	No
CHCHD2	3314.77	8704.76	-1.39289	3.76206e-14	3.88361e-13	Down	Yes
CHCHD4	171.893	1319.13	-2.94	7.45952e-26	2.25204e-24	Down	Yes
CHCHD6	45.0636	111.86	-1.31166	0.00512927	0.0118628	Down	No
CHCHD7	557.524	1939.71	-1.79874	1.01756e-10	7.12188e-10	Down	Yes
CHD1	849.636	4547.65	-2.4202	3.82979e-25	1.10032e-23	Down	Yes
CHD9	101.147	474.717	-2.23061	2.436e-18	3.91889e-17	Down	No
CHDH	1.4683	22.7106	-3.95115	0.00723852	0.0162111	Down	No
CHEK2	160.472	1587.26	-3.30615	6.29871e-66	1.84534e-63	Down	Yes
CHFR	32.5013	138.203	-2.08822	1.97632e-06	8.07967e-06	Down	Yes
CHGA	0.485955	14.2167	-4.87062	0.00204331	0.00513568	Down	No
CHIC1	66.8491	145.975	-1.12674	0.00335609	0.00808174	Down	No
CHID1	4.6584	69.4183	-3.89741	4.80456e-06	1.85658e-05	Down	Yes
CHKB	11.525	109.554	-3.24881	8.5833e-11	6.05019e-10	Down	No
CHML	85.6232	274.918	-1.68293	5.27719e-08	2.67995e-07	Down	No
CHMP1A	1.35987	23.6265	-4.11887	0.00224537	0.00559688	Down	Yes
CHMP2A	10.9576	759.288	-6.11464	1.94222e-28	7.01391e-27	Down	Yes
CHMP4A	15.7375	504.069	-5.00135	1.02304e-27	3.54672e-26	Down	Yes
CHMP6	1.96346	25.6047	-3.70494	0.00231569	0.00575697	Down	No
CHPT1	840.894	1841.42	-1.13082	6.85577e-05	0.000221646	Down	No
CHRM4	13.3526	261.639	-4.29239	7.16344e-09	4.03703e-08	Down	No
CHRNA7	4.08054	25.5694	-2.64758	0.0149504	0.0310301	Down	No
CHST15	1.43181	9.83904	-2.78068	0.0147583	0.0306866	Down	No
CHTF18	3.05915	20.6554	-2.75532	0.00225233	0.00561221	Down	No
CHTF8	14.3737	58.3876	-2.02223	0.000630692	0.0017427	Down	No
CHTOP	413.727	1737.53	-2.07029	2.48577e-33	1.26114e-31	Down	Yes
CIAO1	113.101	286.003	-1.33842	6.75056e-06	2.54889e-05	Down	Yes
CIDEB	0.410632	25.9215	-5.98016	0.000330524	0.000957287	Down	No
CIDEC	0.583967	16.5435	-4.82423	0.00576685	0.0131936	Down	No
CINP	25.1263	236.525	-3.23472	4.41563e-10	2.86876e-09	Down	Yes
CIR1	712.742	1852.57	-1.37807	6.68258e-10	4.26132e-09	Down	Yes
CISD2	331.5	1808.84	-2.44798	6.82417e-21	1.35448e-19	Down	Yes
CIZ1	35.9213	96.3593	-1.42359	0.0209174	0.0418328	Down	No
CKAP4	45.7678	352.377	-2.94472	1.86304e-16	2.47624e-15	Down	Yes
CKB	61.0569	4267.26	-6.12701	3.77275e-16	4.87738e-15	Down	Yes
CKMT1A	69.1087	276.641	-2.00108	5.46498e-09	3.12299e-08	Down	Yes
CKS2	7492.36	26198.5	-1.80599	7.06764e-15	7.86592e-14	Down	Yes
CLASP1	88.3952	192.423	-1.12224	6.81701e-06	2.57211e-05	Down	No
CLCN5	66.8064	203.331	-1.60577	0.00118701	0.00312149	Down	No
CLDN6	22.0866	467.847	-4.40479	2.26197e-06	9.15571e-06	Down	Yes
CLDN7	181.947	444.475	-1.28858	8.38902e-05	0.000267433	Down	Yes
CLDN8	239.415	1285.42	-2.42465	1.70306e-08	9.17757e-08	Down	Yes
CLEC17A	0.0922045	11.3149	-6.93917	0.000653248	0.00179976	Down	No
CLIC5	2.59108	50.7475	-4.29171	0.00909946	0.019901	Down	No
CLIC6	0.849839	45.6138	-5.74614	4.86246e-06	1.87617e-05	Down	No
CLK1	388.302	1978.84	-2.3494	3.38607e-18	5.36432e-17	Down	Yes
CLK3	243.8	637.529	-1.38679	1.05066e-09	6.53553e-09	Down	Yes
CLK4	383.248	770.62	-1.00774	3.64406e-05	0.000123052	Down	Yes
CLP1	256.022	1247.23	-2.28439	3.03925e-33	1.53074e-31	Down	Yes
CLPP	69.3518	154.369	-1.15438	0.000896675	0.00241384	Down	Yes
CLPSL2	0.786778	28.1078	-5.15887	0.00229236	0.0057024	Down	No
CLTC	4002.34	8871.26	-1.14829	7.2715e-16	8.98185e-15	Down	No
CLVS1	0.669357	71.6241	-6.74152	1.66209e-05	5.90185e-05	Down	No
CMSS1	49.4085	834.021	-4.07725	2.30431e-34	1.24498e-32	Down	Yes
CMTM6	1127.82	2912.71	-1.36882	1.5313e-13	1.47945e-12	Down	Yes
CNDP2	125.181	326.068	-1.38115	0.000273043	0.000801633	Down	Yes
CNIH1	1250.01	6824.94	-2.44888	2.29497e-26	7.09325e-25	Down	Yes
CNNM1	0.968874	74.8879	-6.27228	3.98366e-15	4.54548e-14	Down	No
CNNM4	35.3798	106.815	-1.59412	0.000534416	0.00149093	Down	No
CNOT1	977.643	2261.33	-1.20979	1.42108e-17	2.13429e-16	Down	Yes
CNOT8	290.878	998.932	-1.77997	3.58956e-18	5.68237e-17	Down	No
CNOT9	91.8991	968.918	-3.39825	2.5911e-40	1.89114e-38	Down	Yes
CNRIP1	69.897	213.109	-1.60829	7.7675e-08	3.85429e-07	Down	No
CNTF	4.41674	44.3444	-3.3277	1.21091e-05	4.40583e-05	Down	No
COG1	90.2383	362.901	-2.00777	1.93883e-15	2.29537e-14	Down	No
COG8	11.9757	39.0986	-1.70701	0.0115829	0.0247545	Down	No
COL6A6	0.306727	9.15759	-4.89994	0.00732564	0.0163885	Down	No
COL8A1	3.81006	18.2348	-2.25881	0.0111277	0.0239035	Down	No
COL9A1	8.27621	46.1391	-2.47895	0.000386633	0.00110791	Down	No
COMMD6	175.029	1179.88	-2.75297	1.84939e-22	4.18144e-21	Down	Yes
COPS3	83.8825	180.074	-1.10215	0.0135125	0.0283805	Down	Yes
COPS5	486.133	1048.21	-1.1085	3.42008e-05	0.000115959	Down	Yes
COPS6	130.235	319.191	-1.2933	0.00190268	0.00480603	Down	Yes
COPS8	194.768	501.031	-1.36315	3.25774e-06	1.28829e-05	Down	Yes
COPS9	175.701	2179.45	-3.63277	7.61458e-32	3.5835e-30	Down	Yes
COQ10B	1011.9	7919.04	-2.96825	4.60672e-61	1.05302e-58	Down	Yes
COQ3	109.406	734.889	-2.74784	5.46018e-13	4.96838e-12	Down	No
COQ4	13.8182	89.8907	-2.7016	0.000630892	0.00174302	Down	No
COX17	399.225	7578.2	-4.24658	1.40724e-36	8.7904e-35	Down	Yes
COX5B	5703.81	26997.7	-2.24284	1.64678e-17	2.46259e-16	Down	Yes
COX6A1	4918.15	25540.8	-2.37662	6.36146e-34	3.33312e-32	Down	Yes
COX6B	378.362	6508.06	-4.10439	5.27037e-55	9.45077e-53	Down	Yes
COX7A2	1486.6	30377.8	-4.35293	8.30809e-51	1.20011e-48	Down	Yes
CPEB2	165.388	1007.08	-2.60626	3.90034e-17	5.59523e-16	Down	Yes
CPNE3	696.339	3132.31	-2.16937	9.90652e-29	3.66664e-27	Down	Yes
CPNE8	171.706	634.02	-1.88459	6.20775e-08	3.12657e-07	Down	No
CPNE9	5.00925	78.0337	-3.96143	2.20943e-10	1.48685e-09	Down	Yes
CPOX	329.784	1084.6	-1.71757	2.35962e-05	8.19955e-05	Down	No
CPPED1	71.0721	783.831	-3.46319	7.13216e-12	5.74355e-11	Down	Yes
CPS1	39.2335	194.387	-2.30878	1.23623e-07	5.98718e-07	Down	No
CPSF1	3.79785	81.7052	-4.42717	5.80093e-10	3.72194e-09	Down	No
CPSF4	139.049	354.434	-1.34992	1.37986e-05	4.96668e-05	Down	No
CPSF4L	9.70435	75.7241	-2.96405	3.55405e-08	1.84267e-07	Down	No
CPSF6	671.007	1727.96	-1.36467	1.20638e-09	7.46841e-09	Down	Yes
CPSF7	17.4861	186.715	-3.41656	7.68078e-19	1.28534e-17	Down	No
CPT1A	2.22518	638.929	-8.16559	8.70806e-37	5.50567e-35	Down	Yes
CRABP2	2.3609	854.207	-8.4991	2.75813e-13	2.58781e-12	Down	Yes
CRADD	17.097	79.3537	-2.21456	2.27986e-07	1.06474e-06	Down	No
CRAMP1	4.02649	273.819	-6.08755	4.63175e-22	1.02386e-20	Down	No
CRB3	65.9152	136.305	-1.04816	0.0203834	0.0408946	Down	Yes
CREB1	65.938	384.079	-2.54222	1.01693e-14	1.11744e-13	Down	No
CREB3	56.5197	209.834	-1.89242	8.6452e-05	0.000275119	Down	Yes
CREBRF	189.213	1126.77	-2.57411	1.17924e-17	1.78395e-16	Down	Yes
CREBZF	54.9382	485.657	-3.14406	2.17012e-21	4.5231e-20	Down	Yes
CREM	599.983	1304.92	-1.12096	6.14568e-05	0.000200339	Down	No
CRK	754.951	1546.88	-1.03491	7.66064e-07	3.31908e-06	Down	No
CRNKL1	1517.36	4030.82	-1.40951	1.87074e-19	3.30334e-18	Down	No
CRTAP	42.9919	133.029	-1.6296	1.36171e-05	4.909e-05	Down	No
CRYL1	3.07641	41.2374	-3.74463	0.00035959	0.00103584	Down	Yes
CSE1L	491.913	1378.84	-1.48698	3.26699e-12	2.72918e-11	Down	Yes
CSNK1A1	1209.25	5306.22	-2.13358	1.0509e-21	2.25591e-20	Down	Yes
CSNK1G1	629.116	1315.1	-1.06378	1.91209e-07	9.02709e-07	Down	Yes
CSRNP1	55.5034	232.257	-2.06508	8.90161e-12	7.07129e-11	Down	Yes
CSTB	359.137	2472.32	-2.78326	1.10106e-10	7.66762e-10	Down	Yes
CSTF2	77.2845	436.754	-2.49857	2.37083e-14	2.49699e-13	Down	Yes
CSTF2T	13.0124	406.809	-4.9664	5.81478e-19	9.82561e-18	Down	Yes
CSTF3	486.931	2178.98	-2.16186	7.12377e-26	2.1538e-24	Down	Yes
CT55	19.2732	752.561	-5.28714	5.11118e-42	4.07347e-40	Down	Yes
CTDSP2	16.1442	68.5984	-2.08716	2.10345e-05	7.35482e-05	Down	No
CTGF	91.5838	1201.68	-3.71381	7.7139e-20	1.41372e-18	Down	Yes
CTNNA2	13.4768	46.8085	-1.79629	0.00339867	0.0081767	Down	No
CTNNBIP1	10.1746	38.5078	-1.92018	0.00143816	0.00372079	Down	Yes
CTNNBL1	161.086	436.36	-1.43769	9.26999e-10	5.80624e-09	Down	Yes
CTRL	3.92817	62.3999	-3.98962	6.20525e-05	0.000202027	Down	No
CTSC	129.206	641.297	-2.31132	2.40223e-15	2.80881e-14	Down	No
CTSV	295.38	3088.15	-3.3861	3.46775e-19	6.00106e-18	Down	Yes
CTU1	5.97491	66.4775	-3.47588	9.04219e-07	3.88207e-06	Down	No
CTU2	11.5308	86.1929	-2.90208	1.23909e-05	4.49892e-05	Down	Yes
CUEDC2	2.46993	90.9198	-5.20205	0.000501665	0.00140597	Down	No
CUL2	123.119	836.012	-2.76347	2.64807e-34	1.42332e-32	Down	Yes
CUNH14orf2	42.4859	3140.36	-6.2078	4.94669e-64	1.32136e-61	Down	Yes
CUTA	180.485	1311.42	-2.86118	5.25424e-23	1.25193e-21	Down	Yes
CUTC	16.1981	456.075	-4.81538	6.66548e-27	2.16638e-25	Down	Yes
CWC15	2146.12	7493.42	-1.80389	1.9065e-15	2.26096e-14	Down	Yes
CWH43	1.96806	19.6899	-3.32261	0.00192763	0.00486491	Down	No
CXADR	318.433	745.793	-1.22778	6.19661e-05	0.000201778	Down	No
CXCL14	5.51442	104.54	-4.2447	3.70423e-11	2.744e-10	Down	No
CXCL16	6.78605	237.595	-5.12979	7.45266e-17	1.03486e-15	Down	Yes
CXCR4	11.9574	72.2588	-2.59527	0.000611086	0.00169212	Down	Yes
CXH4orf3	877.667	1967.16	-1.16437	5.18331e-05	0.000170787	Down	No
CYB5B	801.459	2417.17	-1.59262	1.06172e-10	7.41598e-10	Down	Yes
CYBRD1	21.0555	942.971	-5.48495	3.99004e-43	3.40151e-41	Down	No
CYCS	12650.5	31514.7	-1.31684	8.08517e-15	8.94573e-14	Down	No
CYP26A1	80.8709	192.559	-1.25161	0.00829641	0.0183199	Down	Yes
CYP27B1	0.239747	16.5379	-6.10811	0.000210767	0.000630452	Down	No
CYP2C42	12.9641	38.3193	-1.56355	0.0248442	0.0486751	Down	No
CYSLTR1	13.3372	261.91	-4.29555	2.51325e-05	8.68551e-05	Down	No
CYTH2	13.5939	129.939	-3.25681	2.16471e-09	1.30026e-08	Down	Yes
D2HGDH	1.363	17.0454	-3.64453	0.0159425	0.0328889	Down	No
DALRD3	6.08397	193.889	-4.99408	6.34553e-12	5.13993e-11	Down	No
DAP3	243.279	849.999	-1.80485	5.22597e-15	5.88233e-14	Down	Yes
DAPK1	25.3045	116.1	-2.19791	1.15328e-05	4.21162e-05	Down	No
DARS2	99.1918	397.785	-2.0037	2.31049e-10	1.55034e-09	Down	No
DBF4	168.41	755.13	-2.16475	8.86606e-14	8.77787e-13	Down	Yes
DBNL	8.84246	47.8846	-2.43704	0.0155916	0.0322355	Down	No
DBR1	248.638	1085.15	-2.12577	1.61444e-22	3.67417e-21	Down	Yes
DCAF10	165.257	338.66	-1.03513	0.000384002	0.00110098	Down	No
DCAF12	82.4992	183.74	-1.15521	0.000323133	0.000937184	Down	Yes
DCAF13	943.822	4908.58	-2.37872	7.26102e-27	2.35259e-25	Down	Yes
DCAF17	84.9601	182.23	-1.1009	0.00183436	0.00464531	Down	No
DCK	669.095	2126.7	-1.66834	1.22571e-13	1.19419e-12	Down	Yes
DCLK3	8.0154	41.0546	-2.3567	0.00684063	0.0153896	Down	No
DCLRE1B	27.3578	378.977	-3.79208	3.33236e-20	6.29006e-19	Down	No
DCLRE1C	64.6699	210.699	-1.70402	1.79207e-09	1.08616e-08	Down	Yes
DCPS	60.8905	203.165	-1.73837	2.43023e-06	9.79107e-06	Down	Yes
DCTN2	41.9742	459.282	-3.45181	7.35947e-11	5.23723e-10	Down	Yes
DCTN3	162.175	378.05	-1.22103	5.31373e-05	0.000174808	Down	Yes
DCTN5	151.028	355.246	-1.23401	0.000906408	0.00243815	Down	Yes
DCUN1D3	143.438	652.024	-2.18449	3.76481e-17	5.40828e-16	Down	Yes
DDOST	153.872	1040.18	-2.75703	6.21415e-24	1.5802e-22	Down	Yes
DDX1	710.743	2663.66	-1.90601	1.67657e-20	3.2381e-19	Down	Yes
DDX17	1925.14	4358.96	-1.17902	1.72287e-08	9.27709e-08	Down	Yes
DDX19A	134.447	363.142	-1.4335	1.83998e-10	1.24995e-09	Down	Yes
DDX19B	43.0014	184.757	-2.10317	6.54467e-08	3.28117e-07	Down	No
DDX27	75.2997	709.431	-3.23595	3.13075e-28	1.11321e-26	Down	Yes
DDX28	14.305	78.3539	-2.45348	1.05374e-05	3.87189e-05	Down	Yes
DDX31	19.7744	62.4732	-1.6596	7.75359e-05	0.000248624	Down	No
DDX39A	953.44	2482.02	-1.3803	3.52732e-12	2.93604e-11	Down	Yes
DDX39B	334.607	670.948	-1.00373	0.000130364	0.000402569	Down	Yes
DDX41	33.6131	94.1039	-1.48523	0.00021028	0.000629086	Down	Yes
DDX47	79.6229	792.233	-3.31467	6.18315e-27	2.01909e-25	Down	Yes
DDX49	27.4532	137.966	-2.32926	1.14347e-10	7.95227e-10	Down	Yes
DDX5	5030.65	11232	-1.1588	1.64409e-09	1.00172e-08	Down	Yes
DDX51	3.01583	132.118	-5.45313	3.71148e-17	5.35014e-16	Down	Yes
DDX54	59.4041	231.167	-1.9603	1.72795e-09	1.05004e-08	Down	No
DDX56	2.33543	71.6268	-4.93874	1.41052e-08	7.68469e-08	Down	Yes
DDX59	99.255	210.513	-1.0847	0.00113912	0.00300657	Down	No
DDX6	397.22	1072.95	-1.43357	2.84875e-08	1.49487e-07	Down	Yes
DEGS1	519.103	2803.01	-2.43289	1.83277e-18	2.97839e-17	Down	Yes
DENND3	12.0241	35.9246	-1.57904	0.00461674	0.0107757	Down	No
DENND5B	118.595	350.327	-1.56265	6.52604e-12	5.27792e-11	Down	Yes
DENND6B	0.213246	5.03666	-4.56188	0.024887	0.0487515	Down	No
DENR	161.353	3044.32	-4.23783	2.30075e-52	3.6256e-50	Down	Yes
DERL1	177.723	618.488	-1.79911	1.89605e-11	1.45266e-10	Down	Yes
DERL3	27.7945	117.665	-2.08181	0.000365452	0.00105171	Down	No
DHDDS	19.3396	178.464	-3.206	1.46612e-09	8.98814e-09	Down	Yes
DHDH	0.508386	131.966	-8.02003	9.71318e-08	4.76519e-07	Down	Yes
DHFR	671.032	1655.29	-1.30263	2.12622e-09	1.27788e-08	Down	Yes
DHPS	26.3769	173.047	-2.71382	2.4879e-06	1.00054e-05	Down	Yes
DHTKD1	20.9988	164.274	-2.96772	3.76471e-13	3.48508e-12	Down	No
DHX15	323.918	3588.64	-3.46974	1.91975e-43	1.67784e-41	Down	Yes
DHX29	345.631	751.037	-1.11965	1.6354e-07	7.77374e-07	Down	Yes
DHX33	77.234	323.153	-2.06491	1.43204e-14	1.54742e-13	Down	No
DHX34	15.6377	123.028	-2.97588	2.19311e-06	8.90297e-06	Down	No
DHX35	79.007	177.182	-1.16518	0.00015126	0.000461614	Down	Yes
DHX37	47.882	102.951	-1.10441	0.00599072	0.0136652	Down	No
DHX8	352.246	716.404	-1.02419	5.28085e-05	0.000173808	Down	Yes
DHX9	549.45	3970.19	-2.85315	1.45098e-28	5.32307e-27	Down	Yes
DIABLO	29.3058	1909.97	-6.02622	1.26555e-69	4.53874e-67	Down	Yes
DIDO1	1.51668	132.96	-6.45393	7.8209e-08	3.87801e-07	Down	No
DIEXF	28.3994	235.133	-3.04954	1.98208e-15	2.3439e-14	Down	Yes
DIO2	6.27009	49.6582	-2.98548	9.12286e-06	3.38201e-05	Down	No
DIS3	682.615	3629.52	-2.41063	3.28047e-18	5.20893e-17	Down	Yes
DIS3L	214.536	534.1	-1.31589	4.253e-10	2.77064e-09	Down	No
DISP1	26.6506	215.666	-3.01656	1.04424e-14	1.14503e-13	Down	Yes
DIXDC1	1.08646	42.3843	-5.28582	0.000826408	0.0022383	Down	No
DKC1	58.1232	321.985	-2.46981	2.75061e-15	3.19283e-14	Down	Yes
DKK3	29.7032	171.548	-2.52993	2.9616e-07	1.35812e-06	Down	No
DKKL1	34.67	219.931	-2.66529	4.70396e-14	4.80349e-13	Down	Yes
DLC1	155.232	462.753	-1.57581	2.49097e-11	1.88075e-10	Down	Yes
DLD	413.512	8898.3	-4.42753	2.56169e-43	2.22023e-41	Down	Yes
DLX5	2.91277	44.9724	-3.94858	6.07511e-07	2.66319e-06	Down	No
DLX6	114.644	309.26	-1.43165	0.000936776	0.00251301	Down	Yes
DMAP1	0.831998	15.9906	-4.2645	0.00913846	0.0199799	Down	No
DMC1	0.191584	6.53217	-5.09152	0.0175824	0.0358103	Down	No
DMRTA2	0.358244	10.2751	-4.84206	0.00945844	0.0205951	Down	No
DMTF1	450.369	1148.59	-1.35069	1.60372e-09	9.77694e-09	Down	Yes
DNAJB11	162.365	766.396	-2.23885	2.05564e-11	1.56973e-10	Down	Yes
DNAJB12	25.3491	172.676	-2.76806	6.96613e-13	6.28644e-12	Down	Yes
DNAJB14	259.161	532.956	-1.04017	4.19786e-06	1.63367e-05	Down	No
DNAJB5	12.162	54.216	-2.15633	0.00863779	0.0189811	Down	No
DNAJB6	225.837	742.609	-1.71732	2.56127e-11	1.93103e-10	Down	No
DNAJB7	0.131478	4.70041	-5.1599	0.0254856	0.0497724	Down	No
DNAJB9	839.034	4628.72	-2.46381	2.4646e-25	7.21044e-24	Down	Yes
DNAJC11	58.948	166.253	-1.49586	6.38319e-05	0.000207399	Down	Yes
DNAJC14	758.087	1530.51	-1.01357	2.39916e-09	1.43446e-08	Down	Yes
DNAJC18	128.048	320.743	-1.32473	6.02829e-05	0.000196728	Down	Yes
DNAJC19	733.045	5177.77	-2.82036	2.27209e-13	2.14728e-12	Down	Yes
DNALI1	11.4601	32.4837	-1.5031	0.00913055	0.0199668	Down	No
DNASE1L2	13.1342	68.6787	-2.38653	0.00752028	0.0167897	Down	No
DOCK6	27.7305	107.598	-1.95611	0.000369106	0.00106164	Down	No
DOHH	7.00531	41.4308	-2.56418	7.41588e-05	0.000238162	Down	Yes
DOLPP1	6.38094	32.702	-2.35754	0.00240492	0.00595461	Down	Yes
DPCD	118.164	891.291	-2.91511	2.60749e-16	3.41983e-15	Down	Yes
DPH1	10.0361	35.9538	-1.84095	0.012311	0.026128	Down	No
DPH2	7.49541	99.87	-3.73597	1.76524e-10	1.20232e-09	Down	Yes
DPH3	555.602	2075.77	-1.90152	8.15357e-17	1.12543e-15	Down	Yes
DPH7	2.06337	34.9385	-4.08174	0.00174105	0.00442571	Down	No
DPM1	1047.99	3110.28	-1.56941	5.73487e-15	6.44119e-14	Down	Yes
DPM3	81.1285	377.368	-2.21769	0.00258691	0.00636883	Down	No
DPP4	28.2288	731.885	-4.69638	3.79412e-07	1.71122e-06	Down	No
DPPA2	618.279	4070.83	-2.71899	9.26731e-19	1.54092e-17	Down	Yes
DPPA4	41.8199	231.943	-2.47151	2.20687e-13	2.08981e-12	Down	Yes
DPRX	12.0442	772.56	-6.00324	3.83801e-48	4.72393e-46	Down	Yes
DPYSL2	47.8694	109.438	-1.19294	0.000298143	0.000870383	Down	Yes
DRAM1	0.327179	49.3068	-7.23556	5.05341e-06	1.94515e-05	Down	No
DRC3	4.9808	22.2248	-2.15772	0.0114616	0.0245255	Down	No
DRD1	2.28145	26.1015	-3.51611	0.00243184	0.00601339	Down	No
DRG1	329.872	2042	-2.63	2.6725e-28	9.55166e-27	Down	Yes
DSC2	464.429	4832.99	-3.37939	1.82135e-17	2.70614e-16	Down	No
DSC3	5.43832	470.78	-6.43575	4.26388e-11	3.13601e-10	Down	No
DSEL	22.091	168.527	-2.93145	2.52811e-12	2.14222e-11	Down	No
DSTYK	17.1718	63.0231	-1.87584	0.00744401	0.0166337	Down	No
DTWD2	104.492	325.84	-1.64077	8.1847e-08	4.04628e-07	Down	Yes
DTYMK	45.1083	189.597	-2.07147	4.14558e-07	1.85845e-06	Down	Yes
DUOX1	0.762266	25.9942	-5.09175	1.66842e-05	5.92132e-05	Down	No
DUOXA1	0.189345	20.5656	-6.76308	0.000118403	0.000367818	Down	No
DUS2	12.8904	86.2905	-2.74291	2.21698e-07	1.037e-06	Down	Yes
DUS3L	2.46143	58.1225	-4.56153	7.91218e-10	4.99943e-09	Down	Yes
DUSP1	18.2539	539.265	-4.88472	4.75687e-25	1.34806e-23	Down	Yes
DUSP11	160.557	1723.72	-3.42437	1.74446e-54	3.02387e-52	Down	Yes
DUSP4	7.49072	109.788	-3.87347	6.79552e-08	3.39956e-07	Down	No
DUSP5	141.169	412.477	-1.54689	3.75879e-05	0.000126577	Down	Yes
DUSP6	16.7176	76.8613	-2.20089	0.00212585	0.00532319	Down	No
DYNC1LI1	25.8128	645.18	-4.64355	5.41671e-34	2.867e-32	Down	Yes
DYRK2	16.0618	82.4036	-2.35908	2.70537e-06	1.08075e-05	Down	No
E2F5	28.5334	463.346	-4.02137	4.17144e-15	4.74413e-14	Down	No
E2F6	1.98794	74.4373	-5.22668	1.02874e-08	5.69423e-08	Down	No
E2F7	102.834	548.262	-2.41455	1.30025e-11	1.01412e-10	Down	No
E4F1	12.5114	81.2459	-2.69906	0.000364479	0.00104906	Down	No
EAF1	158.904	375.677	-1.24133	6.77907e-05	0.000219371	Down	Yes
EAPP	80.6879	1579.53	-4.291	1.32017e-58	2.74609e-56	Down	Yes
EBF3	10.3801	64.7905	-2.64196	2.09697e-05	7.33585e-05	Down	No
EBNA1BP2	33.2537	677.208	-4.34801	4.47789e-42	3.58249e-40	Down	Yes
ECHDC2	7.77945	30.8452	-1.98731	0.00975237	0.0211908	Down	No
ECHS1	261.087	616.376	-1.23928	0.000742796	0.00202901	Down	Yes
ECI1	24.9917	88.9474	-1.8315	0.0246761	0.0483868	Down	No
ECM1	46.0557	183.822	-1.99686	0.000231567	0.000687725	Down	No
ECM2	2.98749	21.6787	-2.85927	0.000383445	0.00109978	Down	No
EDEM3	76.0858	1023.05	-3.7491	1.05869e-33	5.47808e-32	Down	No
EED	85.4416	2136.84	-4.64439	2.99502e-77	1.73054e-74	Down	Yes
EEF1AKMT1	39.7671	171.77	-2.11083	5.56064e-06	2.12428e-05	Down	No
EEF1AKMT2	112.28	453.475	-2.01392	5.13912e-12	4.21858e-11	Down	Yes
EEF1B2	714.611	7189.98	-3.33076	5.48886e-50	7.56118e-48	Down	Yes
EEF1D	30.7413	159.141	-2.37206	1.79989e-06	7.40788e-06	Down	Yes
EEF1E1	109.223	3748.48	-5.10096	4.17885e-111	8.69242e-107	Down	Yes
EEF1G	216.189	2995.07	-3.79222	4.63095e-20	8.61613e-19	Down	Yes
EEF2	862.345	4407.78	-2.35372	9.91411e-20	1.79013e-18	Down	Yes
EEF2KMT	1.46987	20.0824	-3.77217	0.0255569	0.0498929	Down	No
EEFSEC	6.9758	33.755	-2.27467	0.00271021	0.00664252	Down	No
EFCAB2	13.2685	153.146	-3.52883	9.24351e-11	6.49575e-10	Down	No
EFCAB9	1.76343	13.5382	-2.94057	0.0216378	0.0430995	Down	No
EFHD1	0.194602	170.029	-9.77104	6.07741e-11	4.36821e-10	Down	Yes
EFR3B	0.762721	49.0645	-6.00738	7.26162e-05	0.000233713	Down	No
EGLN1	104.791	402.32	-1.94083	5.4472e-09	3.11369e-08	Down	No
EGR2	3.47517	240.785	-6.11452	1.45558e-10	9.9992e-10	Down	No
EID3	313.262	939.643	-1.58474	1.96732e-05	6.90554e-05	Down	No
EIF1AX	700.751	7700.91	-3.45806	1.10554e-38	7.51512e-37	Down	Yes
EIF2AK1	16.314	229.994	-3.81741	6.20549e-17	8.72754e-16	Down	No
EIF2AK3	34.3347	246.283	-2.84258	8.82964e-14	8.75014e-13	Down	No
EIF2AK4	2563.86	7445.77	-1.5381	1.28993e-14	1.40555e-13	Down	No
EIF2B2	9.48711	674.83	-6.15241	2.70817e-47	3.14708e-45	Down	Yes
EIF2B5	46.4411	284.57	-2.61531	6.97589e-11	4.97789e-10	Down	Yes
EIF2S1	397.212	5817.67	-3.87246	6.33562e-51	9.28079e-49	Down	Yes
EIF2S3	828.613	2703.83	-1.70623	5.12392e-17	7.2703e-16	Down	Yes
EIF3A	194.8	5714.9	-4.87466	7.2283e-82	5.18469e-79	Down	Yes
EIF3D	127.23	566.662	-2.15505	1.63491e-19	2.90417e-18	Down	Yes
EIF3F	8.71957	280.413	-5.00715	3.89491e-18	6.15171e-17	Down	No
EIF3G	19.785	1045.13	-5.72313	3.53073e-39	2.48117e-37	Down	Yes
EIF3H	577.643	3905.11	-2.75711	8.80773e-51	1.26351e-48	Down	Yes
EIF3I	627.908	1586.7	-1.3374	4.35936e-08	2.23788e-07	Down	Yes
EIF3J	832.58	3059.84	-1.8778	3.65186e-11	2.71071e-10	Down	Yes
EIF3K	259.618	3280.31	-3.65937	1.42221e-42	1.1693e-40	Down	Yes
EIF3L	405.975	832.533	-1.03612	1.10694e-06	4.6943e-06	Down	Yes
EIF3M	5009.01	13098.9	-1.38685	3.55839e-13	3.30143e-12	Down	Yes
EIF4A1	896.041	5249.52	-2.55055	8.55533e-18	1.30853e-16	Down	Yes
EIF4A2	2773.92	11699.4	-2.07644	1.01169e-22	2.3513e-21	Down	Yes
EIF4A3	442.902	1719.55	-1.95698	2.31197e-18	3.73089e-17	Down	Yes
EIF4E	925.154	7078.05	-2.93559	1.03464e-21	2.2233e-20	Down	Yes
EIF4E2	426.614	1955.03	-2.19619	1.02146e-15	1.24545e-14	Down	Yes
EIF4EBP2	377.943	906.424	-1.26202	1.90275e-07	8.98914e-07	Down	No
EIF4EBP3	19.5441	127.192	-2.7022	0.00191732	0.00484066	Down	No
EIF4G1	118.792	1012.05	-3.09077	6.23962e-18	9.69308e-17	Down	Yes
EIF5	6102.02	12984.2	-1.0894	4.063e-07	1.82418e-06	Down	Yes
EIF5A2	457.317	1208.15	-1.40153	5.65356e-07	2.48836e-06	Down	Yes
EIF6	274.405	2723.66	-3.31117	2.76532e-27	9.27764e-26	Down	Yes
EIPR1	8.61777	170.24	-4.30411	2.52051e-18	4.04858e-17	Down	Yes
ELAC1	11.4289	173.181	-3.92151	2.99422e-12	2.51343e-11	Down	No
ELF2	158.64	328.023	-1.04804	0.000124362	0.000385006	Down	No
ELF4	7.95929	36.0288	-2.17844	0.0217734	0.043339	Down	No
ELL2	619.403	5834.92	-3.23576	9.64239e-25	2.63563e-23	Down	Yes
ELMSAN1	34.9782	72.2846	-1.04723	0.0119212	0.0253759	Down	Yes
ELOB	58.9981	935.728	-3.98735	4.12588e-25	1.1805e-23	Down	Yes
ELOVL7	38.1443	179.308	-2.2329	2.15173e-06	8.74525e-06	Down	No
ELP1	104.099	462.269	-2.15077	5.06255e-22	1.11317e-20	Down	No
ELP5	28.7884	95.5477	-1.73073	0.000448794	0.00127046	Down	No
ELP6	44.0981	288.846	-2.71151	2.68159e-21	5.51184e-20	Down	Yes
EMB	15.2701	106.465	-2.8016	0.000262854	0.000773903	Down	No
EMC3	62.8921	742.024	-3.56052	5.51289e-27	1.81159e-25	Down	Yes
EMC4	109.183	2915.86	-4.7391	3.93095e-75	2.04419e-72	Down	Yes
EMC6	239.643	549.337	-1.19681	8.94021e-05	0.00028383	Down	No
EMC7	33.2108	1081.27	-5.02493	6.96229e-47	7.66257e-45	Down	Yes
EMC9	12.7065	175.232	-3.78562	7.20323e-06	2.71095e-05	Down	No
EMG1	123.937	3004.75	-4.59956	1.0217e-40	7.70017e-39	Down	Yes
EML6	412.228	851.803	-1.04708	6.69075e-06	2.52722e-05	Down	No
EMP1	23.2623	227.303	-3.28855	0.00028507	0.000835056	Down	No
EMP3	0.932338	37.7008	-5.3376	1.55093e-07	7.39927e-07	Down	No
EMSY	86.0315	329.934	-1.93924	2.31662e-10	1.55395e-09	Down	No
ENC1	70.1475	159.92	-1.18889	0.00164563	0.00420472	Down	No
ENDOD1	27.3989	522.967	-4.25453	1.59378e-13	1.53696e-12	Down	No
ENDOG	4.83223	61.1517	-3.66163	1.4953e-06	6.22947e-06	Down	No
ENO1	154.59	429.982	-1.47583	0.00854462	0.0187982	Down	Yes
ENOPH1	21.22	123.08	-2.5361	2.0292e-09	1.22346e-08	Down	Yes
ENPP4	18.6599	583.137	-4.96582	1.74139e-27	5.94788e-26	Down	Yes
EP300	191.565	1100.88	-2.52274	6.47048e-27	2.1063e-25	Down	No
EP400	8.65462	195.727	-4.49923	3.0747e-17	4.46626e-16	Down	No
EPB41L1	20.9491	380.216	-4.18186	0.0043085	0.010129	Down	No
EPC2	56.5902	327.655	-2.53355	8.25225e-13	7.35589e-12	Down	Yes
EPG5	203.635	494.841	-1.28098	3.05268e-07	1.39804e-06	Down	Yes
EPHA2	2.5073	50.447	-4.33056	2.16632e-07	1.01513e-06	Down	No
EPHA4	35.5167	130.73	-1.88002	2.39549e-06	9.67168e-06	Down	No
EPHA7	89.634	186.873	-1.05994	9.75552e-05	0.000307555	Down	No
EPHB4	1.816	63.2421	-5.12205	7.96578e-10	5.03024e-09	Down	No
EPHX3	7.02499	27.6061	-1.97442	0.0253735	0.0495932	Down	No
EPM2AIP1	15.2578	156.291	-3.35661	4.62426e-13	4.24302e-12	Down	No
ERBB3	31.048	671.874	-4.43562	9.36995e-17	1.28905e-15	Down	No
ERCC1	14.7182	66.4513	-2.1747	0.0004672	0.0013188	Down	Yes
ERCC8	340.251	776.625	-1.19062	4.26369e-09	2.47458e-08	Down	No
ERH	160.59	2468.65	-3.94227	1.30536e-52	2.08867e-50	Down	Yes
ERICH1	56.0239	180.231	-1.68574	5.28247e-06	2.02732e-05	Down	Yes
ERICH6	5.52369	29.8595	-2.43448	0.000801434	0.00217575	Down	No
ERMARD	11.9954	130.303	-3.44132	2.51101e-15	2.92941e-14	Down	No
ERMN	3.54639	39.2668	-3.46889	1.68223e-05	5.96523e-05	Down	No
ESCO1	132.274	1793.16	-3.76091	5.44295e-37	3.50523e-35	Down	Yes
ESD	680.788	2657.38	-1.96473	1.74736e-14	1.86777e-13	Down	Yes
ESRP2	136.246	411.671	-1.59528	5.00379e-09	2.88002e-08	Down	No
ESRRB	152.062	647.071	-2.08926	3.91081e-13	3.61389e-12	Down	Yes
ETF1	252.247	6012.81	-4.57513	3.94397e-69	1.36731e-66	Down	Yes
ETFB	43.1867	778.435	-4.17192	1.20918e-10	8.38962e-10	Down	Yes
ETHE1	37.1444	707.872	-4.25227	2.27114e-21	4.71947e-20	Down	Yes
ETNK1	132.819	694.774	-2.38709	1.7493e-19	3.09678e-18	Down	No
ETNPPL	36.8243	878.2	-4.57582	2.13947e-24	5.69822e-23	Down	Yes
ETV2	0.355289	9.49467	-4.74005	0.006849	0.0154034	Down	No
ETV7	10.4013	78.5495	-2.91683	3.33678e-07	1.52078e-06	Down	No
EVI2B	5.06247	19.3623	-1.93534	0.0202295	0.0406172	Down	No
EWSR1	158.63	872.942	-2.46022	1.60079e-13	1.543e-12	Down	Yes
EXD2	19.5668	45.9572	-1.23188	0.00533438	0.0122948	Down	No
EXO5	158.488	581.904	-1.87641	1.27777e-11	9.98082e-11	Down	Yes
EXOC7	5.04125	41.0288	-3.02478	0.0067498	0.015205	Down	No
EXOC8	17.8285	379.118	-4.41039	2.09406e-43	1.82253e-41	Down	Yes
EXOSC1	591.405	4137.93	-2.80669	7.53946e-48	9.11792e-46	Down	Yes
EXOSC10	318.88	1186.26	-1.89534	1.42749e-11	1.10961e-10	Down	Yes
EXOSC2	5.97247	83.731	-3.80936	2.65854e-07	1.22944e-06	Down	Yes
EXOSC3	129.893	851.756	-2.71312	2.761e-24	7.23318e-23	Down	Yes
EXOSC4	3.08704	175.203	-5.82666	2.28436e-12	1.94344e-11	Down	Yes
EXOSC5	58.2379	275.121	-2.24004	3.60973e-13	3.34459e-12	Down	Yes
EXOSC6	2.19685	57.5722	-4.71186	1.13492e-08	6.25197e-08	Down	No
EXOSC8	226.132	2117.75	-3.22729	1.98312e-45	1.92761e-43	Down	Yes
EXOSC9	228.349	1442.34	-2.6591	2.19052e-23	5.31062e-22	Down	Yes
F2R	265.009	930.521	-1.812	7.50176e-11	5.32815e-10	Down	Yes
FAAH	0.468392	54.1975	-6.85437	6.64505e-05	0.000215369	Down	Yes
FAAP20	0.427948	12.229	-4.83673	0.00846455	0.0186457	Down	No
FABP1	3.70861	61.5442	-4.05267	5.38311e-06	2.06366e-05	Down	No
FABP3	8101.95	25690.3	-1.66488	2.70968e-09	1.60902e-08	Down	Yes
FABP5	21.0697	1815.49	-6.42904	4.1072e-27	1.36476e-25	Down	Yes
FADD	0.190909	91.584	-8.90607	4.30719e-09	2.49704e-08	Down	Yes
FAF2	385.118	1064.59	-1.46693	1.01598e-08	5.62958e-08	Down	Yes
FAM104A	300.702	716.847	-1.25333	1.53644e-11	1.18897e-10	Down	No
FAM111A	6.99343	857.936	-6.93873	1.29421e-14	1.40873e-13	Down	Yes
FAM114A2	64.261	1013.62	-3.97943	9.09272e-45	8.63642e-43	Down	Yes
FAM118B	717.578	1977.93	-1.46278	2.33208e-05	8.11165e-05	Down	Yes
FAM122A	1.72354	100.299	-5.86278	9.30357e-10	5.82551e-09	Down	Yes
FAM126A	287.862	636.967	-1.14584	0.000219807	0.00065523	Down	Yes
FAM135A	187.771	451.234	-1.2649	2.77716e-07	1.2806e-06	Down	No
FAM149A	13.1222	192.953	-3.87817	4.1178e-06	1.60371e-05	Down	No
FAM151A	4.02647	128.517	-4.9963	2.01614e-07	9.48817e-07	Down	Yes
FAM155B	0.232962	15.1583	-6.02387	0.000666494	0.00183286	Down	No
FAM161B	37.2201	119.105	-1.67808	6.47068e-06	2.44854e-05	Down	No
FAM162B	1.56633	22.464	-3.84215	0.000189032	0.000568874	Down	No
FAM166A	67.1355	339.158	-2.33681	1.48407e-11	1.1511e-10	Down	No
FAM166B	1.35801	13.4733	-3.31054	0.00228166	0.00567782	Down	No
FAM173A	1.14855	99.2558	-6.43327	4.42983e-05	0.000147573	Down	Yes
FAM174A	9.67893	111.879	-3.53095	2.3517e-05	8.17475e-05	Down	No
FAM185A	88.3312	367.51	-2.05679	2.92835e-10	1.94236e-09	Down	No
FAM200B	50.2499	165.8	-1.72225	2.21645e-06	8.98721e-06	Down	No
FAM210A	900.574	2473.18	-1.45745	2.99311e-21	6.12792e-20	Down	Yes
FAM214B	3.49283	59.7099	-4.0955	2.94439e-10	1.95238e-09	Down	No
FAM219B	50.5915	291.473	-2.5264	1.09607e-14	1.19871e-13	Down	Yes
FAM222A	7.395	81.9936	-3.47089	9.81248e-08	4.81073e-07	Down	No
FAM222B	19.7613	82.7267	-2.06568	0.00144148	0.00372752	Down	No
FAM32A	438.744	4211.33	-3.26282	8.46875e-39	5.83306e-37	Down	Yes
FAM3C	1336.22	2684.12	-1.00629	1.23802e-05	4.49581e-05	Down	Yes
FAM43B	0.114482	58.6232	-9.0002	8.99628e-08	4.42915e-07	Down	No
FAM45A	374.159	751.926	-1.00694	0.000193213	0.000580615	Down	No
FAM50A	10.2151	60.7959	-2.57328	3.85936e-05	0.000129733	Down	Yes
FAM53B	41.259	111.543	-1.43482	9.80428e-05	0.000308811	Down	No
FAM58A	3.48637	35.5167	-3.3487	3.35363e-05	0.000113855	Down	No
FAM69B	4.87407	32.8306	-2.75184	0.0039325	0.00934001	Down	No
FAM76A	242.73	1587.72	-2.70953	9.12136e-16	1.11739e-14	Down	Yes
FAM83B	59.1659	812.116	-3.77885	4.62926e-10	3.00073e-09	Down	No
FAM84A	9.54639	39.3015	-2.04156	0.0048109	0.0111887	Down	No
FAM89A	0.87684	125.378	-7.15975	6.37321e-10	4.07154e-09	Down	No
FAM89B	5.83182	43.2957	-2.89221	2.1211e-06	8.63255e-06	Down	No
FAM91A1	80.8993	1462.93	-4.17659	3.30159e-47	3.77343e-45	Down	Yes
FAM98A	2691.52	6315.87	-1.23056	3.48165e-12	2.90035e-11	Down	Yes
FAR2	52.1669	134.932	-1.37103	0.000942984	0.00252803	Down	No
FARS2	7.42501	58.3674	-2.9747	0.000235241	0.000697642	Down	No
FAS	27.6932	397.024	-3.84163	2.20919e-06	8.96124e-06	Down	No
FASN	0.474909	12.3964	-4.70612	0.0121838	0.0258712	Down	No
FASTK	0.41612	14.7044	-5.14311	0.00400904	0.00949254	Down	No
FASTKD3	38.601	328.845	-3.0907	1.52109e-26	4.77948e-25	Down	Yes
FASTKD5	55.1203	199.251	-1.85393	3.22215e-09	1.89522e-08	Down	Yes
FAU	134.332	1513.03	-3.49357	2.12554e-51	3.15809e-49	Down	Yes
FAXC	16.9238	112.589	-2.73394	1.47454e-09	9.0318e-09	Down	No
FBL	26.9407	969.076	-5.16875	3.07467e-40	2.22844e-38	Down	Yes
FBLN2	2.95032	45.5191	-3.94753	9.80554e-06	3.62025e-05	Down	No
FBRSL1	53.4952	127.177	-1.24935	0.00616489	0.0140133	Down	No
FBXO11	356.575	1217.83	-1.77204	4.70901e-14	4.80629e-13	Down	No
FBXO31	20.7482	48.6662	-1.22993	0.0112326	0.0240851	Down	No
FBXO33	1413.46	3472.71	-1.29683	5.18251e-09	2.97547e-08	Down	No
FBXO38	16.635	117.599	-2.82158	7.85776e-11	5.56707e-10	Down	No
FBXO40	6.38519	72.2668	-3.50053	7.33642e-07	3.1879e-06	Down	No
FBXO45	183.226	854.445	-2.22136	4.11979e-16	5.28987e-15	Down	Yes
FBXO8	448.183	2349.3	-2.39007	3.07647e-25	8.91277e-24	Down	Yes
FBXW7	214.67	1254.31	-2.5467	6.61112e-16	8.21493e-15	Down	Yes
FCAMR	0.428267	11.31	-4.72295	0.00793326	0.0176077	Down	No
FCF1	73.9625	4036.12	-5.77003	3.69961e-81	2.48244e-78	Down	Yes
FCHO2	699.673	1517.7	-1.11713	1.58352e-07	7.54264e-07	Down	No
FCMR	0.416016	18.2549	-5.4555	0.00182645	0.00462639	Down	No
FDPS	128.252	933.859	-2.86423	5.82659e-14	5.89775e-13	Down	Yes
FECH	59.3901	195.51	-1.71895	3.63782e-07	1.64572e-06	Down	Yes
FEM1A	27.5704	160.804	-2.54411	3.29948e-08	1.7198e-07	Down	Yes
FEN1	23.2239	54.7245	-1.23657	0.00770225	0.0171499	Down	Yes
FEZF1	0.528115	48.9966	-6.53569	1.14816e-06	4.85821e-06	Down	No
FFAR2-L	0.904911	19.0824	-4.39832	0.000557113	0.00155009	Down	No
FGD1	93.4442	446.86	-2.25764	2.21221e-17	3.25893e-16	Down	No
FGF13	7.77067	246.397	-4.9868	6.03006e-23	1.42698e-21	Down	Yes
FGFR3	6.98413	86.1561	-3.6248	5.71833e-09	3.25793e-08	Down	No
FH	232.838	2073.41	-3.15461	2.33668e-60	5.11634e-58	Down	Yes
FHDC1	1.6492	56.0517	-5.08692	9.59008e-11	6.73021e-10	Down	No
FHL3	3.34981	74.7148	-4.47924	4.59453e-06	1.78005e-05	Down	No
FICD	38.4449	147.059	-1.93553	6.22829e-05	0.000202714	Down	No
FILIP1L	60.3438	329.988	-2.45114	7.98633e-12	6.39183e-11	Down	No
FIS1	28.6872	297.342	-3.37364	5.66433e-13	5.14739e-12	Down	Yes
FJX1	3.3258	20.4659	-2.62145	0.00651929	0.014732	Down	No
FKBP15	154.925	638.925	-2.04408	4.83653e-14	4.92195e-13	Down	Yes
FKBP1B	33.4855	102.515	-1.61423	0.00171402	0.00436341	Down	Yes
FKBP2	9.98004	735.358	-6.20326	2.40149e-11	1.81517e-10	Down	Yes
FKBP3	904.129	4693.1	-2.37594	1.51615e-23	3.73665e-22	Down	Yes
FKBP4	67.228	317.392	-2.23913	7.32261e-15	8.14533e-14	Down	Yes
FKRP	5.57659	69.2465	-3.63428	0.00186633	0.00472166	Down	No
FLAD1	10.2635	119.71	-3.54395	3.18542e-09	1.8744e-08	Down	Yes
FLRT2	7.98929	106.859	-3.7415	1.72052e-10	1.17262e-09	Down	No
FMO1	0.146186	9.08538	-5.95767	0.010633	0.0229318	Down	No
FMO4	1.08437	84.2244	-6.27931	5.56344e-05	0.000182532	Down	No
FMR1NB	49.0899	141.772	-1.53007	0.000378624	0.00108706	Down	Yes
FN1	175.753	403.351	-1.19849	0.00214265	0.00536139	Down	No
FNBP1	7.34554	254.068	-5.1122	3.91367e-36	2.39436e-34	Down	Yes
FNDC7	1.56101	17.0095	-3.44579	0.00167746	0.0042808	Down	No
FNIP1	253.519	1104.85	-2.12369	3.84385e-10	2.51592e-09	Down	No
FOLH1B	466.607	1799.71	-1.94748	3.21212e-07	1.46782e-06	Down	No
FOS	9.90769	46.3132	-2.2248	0.0126928	0.0268479	Down	Yes
FOXD3	1.45995	12.0182	-3.04123	0.0228315	0.0452217	Down	No
FOXF1	6.52364	47.9471	-2.8777	4.81243e-05	0.000159317	Down	No
FOXI3	5.32968	22.6046	-2.08449	0.0157502	0.0325213	Down	No
FOXRED1	8.60065	100.902	-3.55237	1.22737e-10	8.51303e-10	Down	No
FOXRED2	46.5842	152.857	-1.71427	0.0108477	0.0233561	Down	No
FRAT1	5.17476	19.2273	-1.89359	0.0129869	0.0274087	Down	No
FRAT2	64.6384	655.366	-3.34184	1.09634e-24	2.98494e-23	Down	Yes
FRRS1	83.4832	220.394	-1.40053	0.00147519	0.00380853	Down	No
FRS2	217.76	598.675	-1.45903	7.23216e-09	4.07465e-08	Down	No
FSD1L	125.799	423.28	-1.7505	2.41144e-05	8.36007e-05	Down	No
FTSJ1	143.04	360.471	-1.33346	3.9026e-06	1.52533e-05	Down	Yes
FUBP1	632.476	2206.64	-1.80277	3.3147e-34	1.77704e-32	Down	Yes
FUBP3	56.1848	391.877	-2.80215	1.54194e-10	1.05575e-09	Down	No
FUNDC2	0.92051	247.691	-8.07189	1.5838e-08	8.58155e-08	Down	No
FUS	108.083	308.039	-1.51097	4.54508e-06	1.76253e-05	Down	Yes
FUT1	1.9237	46.2758	-4.5883	0.000136585	0.000419661	Down	No
FUT2A	1.41097	13.9495	-3.30545	0.00751647	0.016783	Down	No
FUT4	9.06267	88.827	-3.29299	1.21286e-07	5.8822e-07	Down	No
FUT9	134.051	1405.85	-3.39058	3.97691e-22	8.85692e-21	Down	Yes
FYTTD1	646.935	1997.15	-1.62625	4.00293e-11	2.95371e-10	Down	Yes
FZD10	1.32783	41.6887	-4.97251	2.80101e-05	9.62241e-05	Down	No
FZD2	4.06762	61.9624	-3.92913	3.77657e-09	2.20478e-08	Down	No
FZD4	55.6762	174.038	-1.64427	0.000132538	0.000408373	Down	Yes
FZD7	106.809	371.652	-1.79892	0.000872039	0.00235208	Down	Yes
G2E3	796.788	1934.59	-1.27976	1.48505e-10	1.01848e-09	Down	Yes
G3BP1	292.716	1162.54	-1.98971	6.96065e-14	6.98112e-13	Down	Yes
G3BP2	487.815	1633.55	-1.74361	3.89758e-19	6.71139e-18	Down	Yes
GABARAP	541.977	1466.1	-1.43568	6.28407e-08	3.16118e-07	Down	Yes
GABARAPL2	2964.96	10032.3	-1.75857	1.29803e-19	2.31762e-18	Down	Yes
GABPA	1505.2	3432.09	-1.18913	1.80186e-08	9.67736e-08	Down	Yes
GABPB1	454.26	1275.45	-1.48941	2.82708e-13	2.65012e-12	Down	Yes
GABRA1	152.451	382.846	-1.32842	0.00369696	0.00882292	Down	Yes
GABRA5	1.40186	56.4061	-5.33044	1.1547e-08	6.3559e-08	Down	Yes
GADD45B	36.0372	103.467	-1.52162	0.00140874	0.00365285	Down	Yes
GADD45GIP1	34.2697	150.605	-2.13577	1.11793e-05	4.08757e-05	Down	Yes
GAL3ST1	0.135818	5.39525	-5.31194	0.0219534	0.0436571	Down	No
GAL3ST2	0.0886669	6.64987	-6.22879	0.00192232	0.00485211	Down	No
GAL3ST3	5.59345	20.8352	-1.89721	0.0231615	0.0457708	Down	No
GALC	783.241	2446.91	-1.64343	1.17819e-18	1.94196e-17	Down	No
GALE	5.51676	69.5905	-3.657	0.00124926	0.00326578	Down	Yes
GALM	98.2675	1376.04	-3.80767	7.86863e-37	5.00536e-35	Down	Yes
GALNT12	7.40759	48.9795	-2.7251	0.0003591	0.00103458	Down	No
GALP	1.57453	28.8786	-4.19701	8.24492e-05	0.000263283	Down	Yes
GALT	6.17123	255.235	-5.37012	5.23822e-12	4.29315e-11	Down	Yes
GAN	112.946	344.765	-1.60998	8.63193e-13	7.66992e-12	Down	No
GAPVD1	294.016	640.677	-1.1237	1.15286e-08	6.34743e-08	Down	No
GAR1	127.996	290.956	-1.1847	0.000661332	0.00181987	Down	Yes
GAREM1	38.8848	86.5948	-1.15507	0.00893687	0.019568	Down	No
GAS1	0.260399	9.9453	-5.25522	0.0077773	0.0173041	Down	No
GAS8	7.24551	29.4601	-2.0236	0.0166847	0.0342502	Down	No
GATA6	37.9082	2428.93	-6.00167	9.8179e-52	1.46922e-49	Down	No
GATAD2A	196.261	434.805	-1.1476	1.06942e-06	4.54445e-06	Down	Yes
GATC	819.878	2277.4	-1.47391	5.83301e-17	8.22593e-16	Down	Yes
GATD1	23.4088	112.514	-2.26498	0.000889116	0.00239566	Down	No
GBA	24.8491	138.416	-2.47775	0.00298517	0.00725913	Down	No
GBGT1	0.295862	11.6877	-5.30393	0.00312949	0.00758347	Down	No
GCC2	728.341	1914.05	-1.39394	2.9301e-08	1.53485e-07	Down	Yes
GCLM	196.245	509.645	-1.37683	5.00484e-06	1.92752e-05	Down	No
GCN1	81.4569	231.79	-1.50871	9.39832e-05	0.000297059	Down	No
GCNA	0.15265	6.7694	-5.47073	0.00461844	0.0107777	Down	No
GCNT4	1.56015	24.9777	-4.00088	7.36096e-05	0.000236691	Down	No
GCNT7	5.78122	26.1616	-2.178	0.0107751	0.0232142	Down	No
GCSAML	11.5297	42.8168	-1.89282	0.0172451	0.0352028	Down	No
GCSH	539.356	23124.6	-5.42204	7.65589e-74	3.46196e-71	Down	Yes
GDE1	1.23363	496.913	-8.65394	9.55407e-10	5.97517e-09	Down	Yes
GDF3	63.7432	170.791	-1.42189	0.000827461	0.00224056	Down	Yes
GDNF	3.82269	73.343	-4.262	3.75321e-13	3.47598e-12	Down	Yes
GDPD1	33.3057	178.701	-2.42371	4.65094e-11	3.40289e-10	Down	Yes
GDPGP1	1.84087	31.5181	-4.09772	7.77187e-06	2.90813e-05	Down	Yes
GEMIN2	52.1608	627.56	-3.58871	1.05083e-20	2.04857e-19	Down	Yes
GEMIN4	10.333	169.649	-4.03722	1.47916e-15	1.77872e-14	Down	No
GEMIN5	241.827	1002.17	-2.05108	8.7195e-25	2.39913e-23	Down	Yes
GEMIN7	40.0373	123.779	-1.62835	0.000185276	0.000558216	Down	Yes
GFER	15.0696	176.769	-3.55215	1.40176e-10	9.65498e-10	Down	No
GFM1	489.53	1227.49	-1.32624	4.98711e-08	2.54195e-07	Down	No
GFY	1.38815	12.1569	-3.13054	0.00720293	0.0161435	Down	No
GGCX	400.056	2232.37	-2.4803	6.25526e-40	4.48675e-38	Down	No
GGTA1P	114.943	1937.52	-4.07521	4.09497e-16	5.26526e-15	Down	No
GHITM	370.374	11004.4	-4.89296	1.45069e-62	3.59236e-60	Down	Yes
GID4	5.53364	35.6571	-2.68789	0.000292405	0.000854858	Down	No
GIF	0.0799311	4.0158	-5.65079	0.0146296	0.0304491	Down	No
GIGYF2	374.001	1187.77	-1.66714	6.65189e-20	1.22665e-18	Down	Yes
GIMD1	0.849231	22.9983	-4.75923	0.00674083	0.015188	Down	No
GINS1	134.336	436.928	-1.70155	8.23861e-05	0.000263122	Down	Yes
GJB3	4.28768	822.14	-7.58304	7.47767e-13	6.71892e-12	Down	Yes
GJB5	1.3132	144.758	-6.78441	9.10559e-06	3.37621e-05	Down	Yes
GJB7	3.23591	31.0902	-3.26422	0.00102352	0.00272403	Down	No
GK	360.621	1218.77	-1.75687	2.08645e-09	1.25543e-08	Down	Yes
GK5	147.388	336.454	-1.19079	0.000300646	0.000876734	Down	No
GLA	1152.89	2487.88	-1.10966	0.000102694	0.000322289	Down	Yes
GLCE	179.908	578.039	-1.6839	1.18033e-08	6.49351e-08	Down	Yes
GLDC	1856.46	5154.94	-1.4734	6.75908e-11	4.83811e-10	Down	No
GLG1	269.241	762.417	-1.50168	4.68404e-11	3.4247e-10	Down	Yes
GLIPR2	202.826	3002.44	-3.88782	9.73415e-42	7.64075e-40	Down	Yes
GLIS2	0.884549	135.424	-7.25832	1.46207e-10	1.00371e-09	Down	No
GLRX2	183.671	563.233	-1.61661	3.48178e-05	0.000117917	Down	Yes
GLRX3	147.831	1195.88	-3.01606	1.78337e-41	1.38417e-39	Down	Yes
GLUL	828.854	1661.4	-1.00321	8.72775e-05	0.000277515	Down	Yes
GM2A	652.93	4712.72	-2.85156	3.11163e-18	4.9484e-17	Down	Yes
GMEB1	57.0009	282.258	-2.30796	2.57231e-15	2.99757e-14	Down	Yes
GML	5.16514	137.074	-4.73	2.43186e-07	1.13166e-06	Down	No
GMPPB	13.5216	171.158	-3.66199	1.81983e-14	1.93925e-13	Down	Yes
GNAZ	4.03929	89.0854	-4.46302	3.3712e-09	1.97868e-08	Down	Yes
GNB1L	8.4398	37.6285	-2.15654	0.0162276	0.0334043	Down	Yes
GNG5	2388.11	5598.92	-1.22928	5.07689e-11	3.69117e-10	Down	Yes
GNG7	0.304207	26.0052	-6.41761	9.1083e-05	0.000288858	Down	No
GNL2	98.9079	1019.46	-3.36557	2.08007e-46	2.23028e-44	Down	Yes
GNL3	341.889	1666.4	-2.28514	3.46577e-15	3.98957e-14	Down	Yes
GNL3L	28.0047	467.497	-4.06121	1.2721e-19	2.27719e-18	Down	Yes
GNMT	0.163899	27.2618	-7.37793	9.07871e-06	3.36744e-05	Down	Yes
GNPNAT1	703.881	2025.63	-1.52497	2.39444e-15	2.80127e-14	Down	No
GNPTG	82.6687	172.83	-1.06394	0.0111425	0.0239288	Down	Yes
GNRHR2	1909.65	6083.29	-1.67155	5.92231e-16	7.439e-15	Down	No
GON7	242.872	2985.94	-3.61991	2.58642e-43	2.23237e-41	Down	Yes
GORAB	63.889	204.094	-1.67559	3.27324e-08	1.70686e-07	Down	No
GOT1	314.401	995.675	-1.66307	3.7249e-08	1.92549e-07	Down	Yes
GPAM	411.485	1252.49	-1.60589	7.21198e-10	4.58205e-09	Down	No
GPATCH2L	108.465	378.682	-1.80376	1.37092e-12	1.19266e-11	Down	Yes
GPATCH3	33.4898	111.517	-1.73547	1.52812e-05	5.46065e-05	Down	No
GPD2	210.691	4259.32	-4.33742	5.535e-55	9.84047e-53	Down	Yes
GPHA2	8.52836	46.2076	-2.43779	2.01534e-05	7.06456e-05	Down	No
GPKOW	11.5014	64.5462	-2.48852	8.8099e-05	0.000279949	Down	Yes
GPN2	9.20978	46.7031	-2.34228	0.000237263	0.000703435	Down	No
GPN3	822.504	3594.42	-2.12766	1.81582e-25	5.37281e-24	Down	Yes
GPR142	0.0842952	15.9747	-7.56612	4.75215e-05	0.000157504	Down	Yes
GPR155	8.37131	171.169	-4.35382	7.43767e-29	2.7726e-27	Down	No
GPR171	3.87214	71.7241	-4.21125	1.51699e-07	7.244e-07	Down	No
GPR34	0.254842	6.44732	-4.66103	0.0180119	0.0365991	Down	No
GPR52	10.6516	46.2573	-2.11861	0.00273987	0.00670968	Down	No
GPR82	0.127737	9.91187	-6.27791	0.00161669	0.00413841	Down	No
GPR87	0.0881015	13.6667	-7.27728	0.000124057	0.000384224	Down	No
GPRC5C	1.17271	76.1886	-6.02166	2.80046e-07	1.2902e-06	Down	Yes
GPT2	69.1044	168.076	-1.28226	3.93055e-06	1.5351e-05	Down	No
GPX4	222.15	790.531	-1.83129	1.56148e-06	6.48336e-06	Down	Yes
GPX6	1385.7	3159.69	-1.18917	0.000472807	0.001333	Down	No
GRAMD1B	26.0254	237.461	-3.1897	1.09431e-16	1.4946e-15	Down	No
GRB2	28.518	180.309	-2.66053	2.07936e-07	9.76579e-07	Down	Yes
GREB1	2.29483	26.2026	-3.51325	0.0107936	0.0232492	Down	No
GRID1	2.85204	20.0509	-2.8136	0.000862281	0.00232879	Down	No
GRPEL1	207.406	790.401	-1.93013	1.27451e-08	6.98211e-08	Down	Yes
GRSF1	990.51	2210.27	-1.15798	4.60656e-09	2.66317e-08	Down	No
GRWD1	28.6139	121.673	-2.08822	6.45579e-06	2.44336e-05	Down	Yes
GRXCR2	0.0961936	5.44032	-5.82161	0.00786951	0.0174886	Down	No
GSC	55.5556	124.621	-1.16554	0.00211729	0.00530368	Down	No
GSG1	2.8353	34.8312	-3.61881	5.66276e-05	0.000185556	Down	No
GSG2	62.2048	171.068	-1.45947	4.38565e-05	0.000146148	Down	Yes
GSK3B	234.985	1085.1	-2.20719	9.89331e-31	4.30525e-29	Down	Yes
GSPT1	385.24	4108.37	-3.41474	2.92689e-52	4.50979e-50	Down	Yes
GSPT2	6.04465	62.9689	-3.38091	0.000202388	0.000606785	Down	No
GSTK1	16.3143	47.7393	-1.54904	0.0216119	0.0430521	Down	No
GTDC1	33.6792	315.716	-3.2287	3.20802e-29	1.23346e-27	Down	No
GTF2A1	808.345	2065.92	-1.35374	9.4934e-11	6.66461e-10	Down	No
GTF2A2	2796.18	6194.17	-1.14746	2.5351e-11	1.91268e-10	Down	No
GTF2B	638.286	2943.88	-2.20544	1.82921e-14	1.94825e-13	Down	No
GTF2H3	57.2936	1190.94	-4.37759	2.7548e-35	1.58733e-33	Down	Yes
GTF2H5	159.039	4587.72	-4.85032	1.02581e-42	8.46743e-41	Down	Yes
GTF3A	16.0446	117.717	-2.87517	2.36161e-09	1.41242e-08	Down	Yes
GTF3C4	8.97718	143.227	-3.9959	4.09591e-16	5.26526e-15	Down	No
GTF3C6	230.304	942.191	-2.03248	3.37621e-12	2.81703e-11	Down	Yes
GTPBP10	619.646	1778.51	-1.52115	3.76699e-14	3.88677e-13	Down	Yes
GTPBP4	192.646	392.976	-1.02849	0.00146334	0.0037803	Down	Yes
GTPBP8	107.993	997.277	-3.20706	5.33287e-33	2.64117e-31	Down	Yes
GTSE1	5.63273	67.1082	-3.57458	3.15367e-08	1.64864e-07	Down	No
GUCY1A2	2.5987	17.1672	-2.72379	0.0151749	0.031452	Down	No
GUF1	95.5332	318.076	-1.7353	1.91018e-07	9.02013e-07	Down	No
GUSB	8.72977	49.551	-2.5049	0.00407409	0.00963671	Down	No
GXYLT1	859.352	1771.02	-1.04326	9.94475e-06	3.66644e-05	Down	No
GYG1	131.084	333.273	-1.34621	0.000471612	0.00133011	Down	No
GZF1	9.59613	35.6634	-1.89392	0.0201616	0.0405199	Down	No
H2AFZ	1865.79	22871.2	-3.61567	1.78938e-40	1.33408e-38	Down	Yes
H3F3A	502.133	3467.39	-2.78771	2.084e-28	7.49989e-27	Down	Yes
HAND2	1.43675	39.3872	-4.77685	8.93223e-08	4.39866e-07	Down	No
HAO1	0.34936	26.6229	-6.25181	0.0152587	0.0316068	Down	No
HAO2	29.6618	103.25	-1.79947	7.78415e-06	2.91167e-05	Down	No
HARS	4.67328	208.587	-5.48007	6.28229e-16	7.84381e-15	Down	Yes
HAUS2	120.521	396.512	-1.71808	4.98969e-06	1.92205e-05	Down	Yes
HAUS5	16.7593	68.2807	-2.02652	3.08971e-05	0.000105359	Down	No
HAUS6	170.489	947.588	-2.47458	6.01828e-34	3.16927e-32	Down	Yes
HAUS7	8.12244	174.244	-4.42305	8.883e-17	1.22449e-15	Down	Yes
HAVCR1	884.289	7616.39	-3.10652	2.81902e-21	5.7886e-20	Down	Yes
HBP1	926.161	3549.83	-1.93841	6.32164e-17	8.86393e-16	Down	Yes
HBS1L	997.486	4141.38	-2.05374	3.43434e-20	6.47081e-19	Down	Yes
HCLS1	4.07675	28.0483	-2.78242	0.00689889	0.0155005	Down	No
HCN1	22.7834	96.9533	-2.08931	4.11081e-07	1.84445e-06	Down	No
HDAC2	517.602	2113.95	-2.03003	7.71009e-18	1.18886e-16	Down	Yes
HDAC5	2.71162	43.3511	-3.99884	7.6577e-06	2.87005e-05	Down	No
HDAC8	15.5827	88.3003	-2.50247	1.46986e-05	5.26692e-05	Down	Yes
HDDC2	163.448	1216.79	-2.89617	1.56626e-31	7.20791e-30	Down	Yes
HDGFL2	42.1226	126.07	-1.58156	6.24049e-06	2.36618e-05	Down	Yes
HDHD3	3.74173	74.8777	-4.32276	1.24496e-06	5.24219e-06	Down	Yes
HEATR3	34.4534	564.566	-4.03442	3.50583e-22	7.82455e-21	Down	Yes
HEBP1	279.884	4082.82	-3.86667	0.00791702	0.0175763	Down	Yes
HEBP2	10.4332	56.9312	-2.44804	0.0186631	0.0377784	Down	No
HELZ2	15.4178	187.147	-3.6015	2.15842e-15	2.54149e-14	Down	Yes
HENMT1	6041.05	12974.6	-1.10282	9.06254e-07	3.89001e-06	Down	Yes
HERPUD1	289.07	2003.9	-2.79332	7.15193e-08	3.5667e-07	Down	No
HES1	2.72812	65.8604	-4.59343	7.81315e-07	3.37882e-06	Down	No
HEXIM1	112.712	284.285	-1.33469	0.00860673	0.0189188	Down	No
HGH1	3.49666	23.0733	-2.72217	0.00872122	0.0191482	Down	No
HGS	8.44932	36.4326	-2.10832	0.00954371	0.0207656	Down	No
HINFP	5.61786	100.316	-4.15839	2.69869e-11	2.03022e-10	Down	Yes
HINT1	751.18	8509.54	-3.50185	5.54841e-32	2.64707e-30	Down	Yes
HINT2	243.034	609.847	-1.32729	0.00363403	0.00869066	Down	No
HIPK3	181.949	3751.81	-4.36598	7.14482e-102	2.47699e-98	Down	Yes
HK2	26.194	246.864	-3.23641	9.13011e-23	2.13628e-21	Down	Yes
HK3	0.20216	11.9997	-5.89136	0.000703554	0.00192815	Down	No
HMBS	8.16814	178.81	-4.45227	3.89485e-08	2.01084e-07	Down	Yes
HMGN1	1716.01	5400.9	-1.65414	3.30443e-17	4.78993e-16	Down	No
HMOX1	1.30685	46.4581	-5.15177	0.00170756	0.00434907	Down	Yes
HMX3	2.27895	14.3682	-2.65644	0.00569437	0.0130494	Down	No
HNRNPA0	331.336	1208.53	-1.86689	2.64756e-11	1.99247e-10	Down	No
HNRNPA2B1	3858.96	14331.6	-1.89292	9.56163e-20	1.73554e-18	Down	Yes
HNRNPAB	440.379	2754.69	-2.64507	3.48997e-33	1.74927e-31	Down	Yes
HNRNPC	1563.61	4505.01	-1.52665	2.35118e-09	1.40658e-08	Down	Yes
HNRNPD	403.993	1485.87	-1.8789	4.08804e-15	4.65437e-14	Down	Yes
HNRNPDL	2160.37	6097.88	-1.49703	5.4298e-17	7.68335e-16	Down	Yes
HNRNPF	2656.11	7514.52	-1.50036	2.31502e-15	2.71142e-14	Down	Yes
HNRNPH1	943.845	4675.03	-2.30835	1.0334e-34	5.71697e-33	Down	Yes
HNRNPH2	736.843	2764.02	-1.90734	7.28118e-11	5.18507e-10	Down	Yes
HNRNPK	690.732	1563.93	-1.17898	8.15969e-05	0.000260721	Down	Yes
HNRNPL	575.925	1820.06	-1.66003	3.2347e-05	0.000110015	Down	No
HNRNPLL	109.847	467.102	-2.08824	1.52437e-07	7.27592e-07	Down	No
HNRNPM	410.7	1632.07	-1.99055	3.26457e-24	8.44605e-23	Down	Yes
HNRNPR	1034.53	2598.08	-1.32847	1.33157e-12	1.16134e-11	Down	Yes
HOMER3	2.03739	21.8669	-3.42396	0.0162056	0.0333723	Down	No
HOXA13	5.06148	27.2036	-2.42616	0.00414775	0.0097909	Down	No
HOXD3	2.41871	47.2681	-4.28856	3.54516e-07	1.6066e-06	Down	No
HPCA	0.389253	74.6384	-7.58307	5.33899e-11	3.86956e-10	Down	Yes
HPDL	2.85281	49.0896	-4.10496	0.0176963	0.0360211	Down	No
HPSE2	5.15978	33.9026	-2.71601	0.000166462	0.000505264	Down	No
HRK	2.2558	19.1548	-3.08599	0.0107162	0.0230944	Down	No
HS3ST3B1	4.69626	114.922	-4.613	9.03656e-11	6.35462e-10	Down	No
HS6ST1	3.27941	29.8948	-3.18839	0.013281	0.0279585	Down	No
HSBP1	1282.97	3838.03	-1.58087	1.31404e-14	1.42957e-13	Down	Yes
HSCB	242.361	713.772	-1.5583	1.66784e-08	9.00877e-08	Down	No
HSD11B1	0.374021	10.1795	-4.7664	0.0237086	0.0467142	Down	No
HSF2	47.0831	302.493	-2.68362	1.69428e-13	1.62935e-12	Down	Yes
HSH2D	26.4616	225.796	-3.09305	6.35306e-22	1.38232e-20	Down	Yes
HSPA13	50.5196	1004.45	-4.31341	5.49033e-28	1.92587e-26	Down	No
HSPA4	810.701	2290.72	-1.49856	3.51103e-17	5.07525e-16	Down	Yes
HSPA5	1227.2	4335.46	-1.82082	4.8868e-06	1.88486e-05	Down	Yes
HSPA8	2553.53	20486.1	-3.00408	7.04013e-58	1.42176e-55	Down	Yes
HSPB11	61.4741	624.221	-3.34401	2.1278e-14	2.25129e-13	Down	Yes
HSPB3	42.5377	154.287	-1.8588	0.00461863	0.0107777	Down	No
HSPB8	12.8459	71.607	-2.47879	0.000631452	0.0017441	Down	Yes
HSPBP1	17.029	58.9601	-1.79175	0.000350698	0.00101219	Down	Yes
HSPD1	2077.64	8414.27	-2.01789	4.17103e-15	4.74413e-14	Down	Yes
HTR1F	4.97505	278.779	-5.80827	8.01947e-18	1.23291e-16	Down	Yes
HTR2B	10.5888	46.0708	-2.12131	0.00112886	0.00298215	Down	No
HTRA2	8.06636	136.346	-4.07921	0.000226367	0.000673435	Down	No
HUWE1	352.323	1972.01	-2.4847	4.12075e-22	9.15354e-21	Down	No
HYAL3	1.60376	15.638	-3.28553	0.00458907	0.0107219	Down	Yes
HYOU1	130.435	334.878	-1.3603	0.000172122	0.000520698	Down	No
IAH1	218.286	909.462	-2.05879	2.94999e-13	2.76035e-12	Down	Yes
IAPP	5.83847	66.9085	-3.51853	1.15522e-05	4.21795e-05	Down	Yes
IARS	237.88	1774.43	-2.89905	5.07092e-24	1.29424e-22	Down	Yes
ICMT	94.7903	191.725	-1.01623	0.00383039	0.0091152	Down	No
ID4	21.1912	199.928	-3.23794	1.43936e-05	5.16564e-05	Down	No
IDH2	68.3203	289.059	-2.08098	3.53288e-09	2.06774e-08	Down	Yes
IDH3B	12.0093	685.945	-5.83587	5.41326e-39	3.77856e-37	Down	Yes
IDH3G	21.7012	215.296	-3.31048	3.01561e-11	2.25964e-10	Down	Yes
IER5	47.61	253.954	-2.41523	0.00148633	0.00383398	Down	No
IFI30	12.9108	457.84	-5.14819	5.22167e-38	3.48128e-36	Down	Yes
IFI6	0.0956962	79.2056	-9.69293	5.00962e-10	3.2382e-09	Down	Yes
IFNAR2	9.35994	82.7289	-3.14382	1.16549e-07	5.66697e-07	Down	No
IFNGR1	50.0772	196.637	-1.97331	3.59673e-05	0.000121592	Down	Yes
IFRD1	402.775	2442.84	-2.60051	3.81018e-19	6.56633e-18	Down	Yes
IGF2BP1	1.81583	315.581	-7.44124	4.22385e-25	1.20687e-23	Down	Yes
IGFBP7	43.8537	264.529	-2.59265	1.84074e-12	1.57959e-11	Down	No
IGHMBP2	126.843	514.803	-2.02098	1.6472e-19	2.92349e-18	Down	Yes
IGSF3	4.96718	192.475	-5.2761	7.31256e-25	2.03373e-23	Down	Yes
IKBIP	103.971	493.417	-2.24662	0.000107289	0.000335446	Down	No
IKBKB	9.10228	140.078	-3.94386	8.62794e-13	7.66965e-12	Down	Yes
IKBKG	4.82752	37.7669	-2.96777	0.000574136	0.00159383	Down	No
IKZF5	263.189	1029.51	-1.96779	1.70601e-12	1.47004e-11	Down	Yes
IL10	1.53549	43.3539	-4.81939	1.85285e-09	1.12136e-08	Down	Yes
IL10RB	1.66462	30.1218	-4.17755	5.18414e-05	0.000170788	Down	Yes
IL15	0.753072	13.4342	-4.15698	0.00399486	0.00946328	Down	No
IL17RD	80.8787	229.038	-1.50176	0.000223587	0.00066545	Down	Yes
IL20	0.150524	18.9935	-6.97937	0.000549579	0.00152975	Down	Yes
IL24	0.471655	19.7135	-5.38531	0.00253217	0.00624219	Down	No
IL2RG	7.63958	181.197	-4.56792	9.4485e-18	1.43563e-16	Down	Yes
ILF2	702.873	3626.4	-2.3672	4.15971e-18	6.55501e-17	Down	Yes
ILF3	371.346	1528.83	-2.0416	1.90961e-17	2.82919e-16	Down	Yes
ILKAP	36.1086	113.787	-1.65592	6.28309e-06	2.38146e-05	Down	No
ILVBL	21.9357	116.234	-2.40568	0.00574877	0.0131566	Down	No
IMP3	352.567	1737.52	-2.30106	8.16031e-27	2.6338e-25	Down	Yes
IMP4	46.4907	896.555	-4.26938	1.31414e-35	7.65701e-34	Down	Yes
IMPACT	110.864	324.522	-1.54953	1.65834e-06	6.85243e-06	Down	Yes
IMPDH1	3.74651	38.3397	-3.35522	8.38806e-05	0.000267433	Down	Yes
INA	9.11482	48.3834	-2.40822	0.000217512	0.000649004	Down	No
INCENP	92.9995	202.457	-1.12232	0.00063694	0.00175739	Down	Yes
INMT	0.22957	8.05157	-5.13227	0.0202972	0.0407414	Down	No
INO80C	18.2127	144.312	-2.98617	1.32666e-10	9.17413e-10	Down	Yes
INPP5K	1.90533	48.2409	-4.66214	3.35402e-07	1.5273e-06	Down	Yes
INSM2	8.90289	68.8638	-2.9514	5.42102e-05	0.000178168	Down	No
INTS1	2.50174	14.1153	-2.49625	0.0196676	0.0396151	Down	No
INTS12	224.178	559.133	-1.31855	1.38637e-10	9.55531e-10	Down	Yes
INTS6L	48.1566	358.225	-2.89506	1.20616e-11	9.45698e-11	Down	Yes
INTS7	138.585	334.627	-1.27178	1.01432e-05	3.73433e-05	Down	Yes
INTS8	68.4434	640.437	-3.22607	6.24751e-36	3.78876e-34	Down	No
IPMK	247.621	2701.95	-3.44779	8.2624e-48	9.93446e-46	Down	Yes
IPO11	334.057	1408.18	-2.07566	5.39717e-15	6.06846e-14	Down	Yes
IPO13	15.6832	58.2742	-1.89364	0.00172336	0.00438449	Down	No
IPO5	129.548	1801.63	-3.79774	1.93213e-42	1.56993e-40	Down	Yes
IPO7	420.438	1467.87	-1.80376	1.44852e-24	3.89789e-23	Down	No
IPO9	27.698	140.092	-2.33852	4.04687e-08	2.08725e-07	Down	Yes
IPPK	71.8901	536.709	-2.90028	5.84677e-23	1.38676e-21	Down	Yes
IQCK	0.229021	19.9498	-6.44475	0.000238047	0.000705358	Down	No
IRAK1BP1	41.8471	118.008	-1.49568	0.000136288	0.000418871	Down	No
IREB2	458.983	968.981	-1.07803	1.4381e-07	6.89421e-07	Down	No
IRF1	27.7089	81.5959	-1.55815	0.000106374	0.000332984	Down	Yes
IRF2BP2	59.0955	393.249	-2.73432	2.29288e-10	1.53902e-09	Down	No
IRGQ	3.38516	101.436	-4.9052	3.88781e-14	4.00546e-13	Down	Yes
IRS2	4.06743	31.6544	-2.96022	0.00220531	0.00550692	Down	No
IRX5	3.26796	23.4201	-2.84129	0.00150953	0.00388851	Down	No
ISCA2	362.821	818.571	-1.17385	5.64178e-09	3.21872e-08	Down	Yes
ISG15	0.221917	8.12745	-5.19471	0.0104463	0.0225568	Down	Yes
ISG20L2	7.47435	500.983	-6.06667	4.36198e-46	4.51411e-44	Down	Yes
IST1	264.604	861.292	-1.70267	1.19205e-13	1.16467e-12	Down	Yes
ITFG2	4.89578	72.6852	-3.89205	4.61405e-08	2.36222e-07	Down	No
ITGAV	181.537	552.068	-1.60458	2.00169e-06	8.17638e-06	Down	No
ITGB1	212.158	2025.09	-3.25478	2.5933e-19	4.53304e-18	Down	Yes
ITGB1BP1	164.034	721.113	-2.13623	2.98031e-27	9.95079e-26	Down	Yes
ITGB8	12.337	113.689	-3.20403	2.11682e-12	1.80755e-11	Down	No
ITM2A	0.104638	61.2831	-9.19394	9.0857e-08	4.46895e-07	Down	Yes
ITM2B	1224.63	8184.96	-2.74063	6.0527e-22	1.31973e-20	Down	Yes
ITPKA	5.07371	173.068	-5.09215	3.19124e-07	1.45925e-06	Down	No
ITPRIP	1.17083	23.3071	-4.31516	7.27355e-05	0.000234061	Down	No
ITPRIPL2	178.032	486.626	-1.45068	1.30424e-05	4.71406e-05	Down	No
JAK2	116.58	374.26	-1.68272	9.03691e-08	4.44705e-07	Down	No
JAKMIP3	6.02822	45.8706	-2.92777	0.0004777	0.00134515	Down	No
JAML	8.33933	134.822	-4.01498	7.47549e-09	4.20491e-08	Down	No
JCAD	0.946048	223.606	-7.88483	7.95725e-22	1.72415e-20	Down	No
JKAMP	174.553	656.527	-1.91119	1.21423e-09	7.51033e-09	Down	No
JMJD1C	379.234	866.431	-1.192	7.78549e-08	3.86137e-07	Down	No
JOSD1	1273.75	5051.61	-1.98766	1.71737e-11	1.32112e-10	Down	Yes
JPT1	453.287	1977.44	-2.12513	1.07887e-10	7.53074e-10	Down	Yes
JUND	37.4671	155.059	-2.04912	0.000354061	0.00102119	Down	No
JUP	8.42154	87.9394	-3.38435	0.00125297	0.00327466	Down	No
KANSL2	563.489	1761.08	-1.644	3.67619e-16	4.76736e-15	Down	Yes
KAT14	15.4477	198.128	-3.68097	2.34924e-16	3.09674e-15	Down	Yes
KAT2B	15.9822	286.722	-4.16512	1.22312e-21	2.60411e-20	Down	No
KAT5	96.6492	266.134	-1.46132	5.08681e-05	0.000167847	Down	Yes
KAT7	294.523	589.054	-1.00002	5.22596e-06	2.00674e-05	Down	Yes
KBTBD2	318.962	1621.92	-2.34624	1.57047e-26	4.91979e-25	Down	Yes
KBTBD7	28.8557	84.0576	-1.54252	0.00113458	0.00299535	Down	No
KCNA5	1.05239	18.8327	-4.1615	0.000659058	0.00181385	Down	No
KCNAB2	0.0941967	34.7967	-8.52906	5.68187e-08	2.87844e-07	Down	No
KCNB1	0.36521	18.094	-5.63065	0.00187108	0.00473312	Down	No
KCNH8	1.36274	30.4077	-4.47985	0.000445505	0.00126167	Down	No
KCNIP1	5.39545	45.8634	-3.08753	2.42219e-05	8.39033e-05	Down	No
KCNJ13	36.1525	74.5346	-1.04382	0.0131248	0.0276605	Down	No
KCNJ14	9.84916	85.4359	-3.11677	1.95484e-07	9.21426e-07	Down	No
KCNJ3	7.24263	38.6144	-2.41455	0.00421542	0.00992922	Down	No
KCNK5	0.105663	29.1888	-8.10979	1.504e-06	6.26448e-06	Down	No
KCNS3	0.26715	59.5935	-7.80136	2.85396e-07	1.31252e-06	Down	Yes
KCTD1	1.89433	108.963	-5.846	1.85269e-10	1.25817e-09	Down	Yes
KCTD18	16.8843	65.3896	-1.95338	0.000371762	0.00106883	Down	No
KCTD20	113.773	452.874	-1.99295	1.44119e-19	2.56662e-18	Down	Yes
KDELR3	10.5955	69.0713	-2.70464	0.00238855	0.00591901	Down	No
KDF1	2.32756	72.2519	-4.95614	2.72977e-08	1.43389e-07	Down	No
KDM2B	153.004	393.863	-1.36412	2.1922e-09	1.31564e-08	Down	No
KDM4A	90.2427	201.802	-1.16106	0.0025378	0.00625387	Down	No
KDM5B	18.3961	784.279	-5.4139	1.43963e-44	1.34891e-42	Down	Yes
KDM5C	11.7391	133.505	-3.5075	1.03463e-08	5.72528e-08	Down	No
KDM7A	87.4393	343.841	-1.97539	1.22899e-09	7.59938e-09	Down	No
KDSR	74.5228	245.68	-1.72103	1.46628e-07	7.02445e-07	Down	No
KEAP1	11.8525	94.6832	-2.99792	0.000789382	0.00214555	Down	No
KHNYN	7.66873	394.835	-5.68612	4.42835e-11	3.25032e-10	Down	No
KIAA0408	57.361	217.39	-1.92214	0.00223779	0.00557999	Down	No
KIAA0556	2.61774	17.6382	-2.75231	0.0181306	0.0368099	Down	No
KIAA0907	69.9348	349.06	-2.31939	3.70536e-15	4.24891e-14	Down	Yes
KIAA1143	369.635	1033.7	-1.48364	5.13777e-08	2.61362e-07	Down	Yes
KIAA1217	33.0555	94.6024	-1.51698	4.73549e-05	0.000157052	Down	No
KIAA1456	5.84307	214.093	-5.19537	6.18769e-10	3.95787e-09	Down	No
KIAA2013	1.37892	43.0055	-4.96291	0.00113115	0.00298706	Down	No
KIAA2026	129.817	651.158	-2.32652	5.66651e-21	1.13773e-19	Down	No
KIF18B	6.00533	58.0004	-3.27175	2.76403e-05	9.50292e-05	Down	No
KIF1BP	408.055	1092.79	-1.42118	3.17952e-09	1.87252e-08	Down	Yes
KIF5B	1173.55	3583.39	-1.61045	5.17667e-13	4.72695e-12	Down	No
KIFC1	16.228	55.7088	-1.77942	0.000448947	0.00127072	Down	Yes
KIN	225.918	774.676	-1.77779	8.61322e-18	1.31544e-16	Down	Yes
KIRREL	4.83003	37.9569	-2.97426	0.00503733	0.0116657	Down	No
KLB	77.4592	4888.85	-5.97991	4.39014e-59	9.22416e-57	Down	No
KLF10	90.003	1550.5	-4.10662	4.44981e-24	1.14231e-22	Down	Yes
KLF12	95.0814	211.973	-1.15665	0.000315035	0.000916125	Down	No
KLF17	94.6677	827.072	-3.12707	9.3692e-38	6.18694e-36	Down	Yes
KLF3	410.724	1404.72	-1.77404	7.47926e-14	7.46527e-13	Down	Yes
KLF4	182.533	4124.26	-4.49791	7.18408e-30	2.91298e-28	Down	Yes
KLF5	58.048	174.358	-1.58673	0.000799083	0.00217022	Down	No
KLF8	42.138	247.844	-2.55624	5.98139e-15	6.69639e-14	Down	Yes
KLHDC3	36.2099	93.8751	-1.37436	0.0139021	0.0291098	Down	Yes
KLHDC4	2.87821	32.6681	-3.50464	3.36146e-06	1.32729e-05	Down	No
KLHL20	293.627	763.876	-1.37935	1.0319e-11	8.13361e-11	Down	No
KLHL23	3.4615	28.7492	-3.05405	0.000271332	0.000796947	Down	No
KLHL24	9.26918	585.078	-5.98004	8.88599e-35	4.929e-33	Down	No
KLHL26	1.91303	43.2706	-4.49946	1.00058e-06	4.26935e-06	Down	No
KLHL28	563.603	1929.93	-1.7758	1.06974e-15	1.30051e-14	Down	Yes
KLHL35	0.162328	6.62772	-5.35152	0.00833177	0.0183863	Down	No
KLHL9	43.149	327.842	-2.9256	8.35569e-11	5.89975e-10	Down	No
KLK13	0.259305	33.6806	-7.02112	1.0772e-05	3.94833e-05	Down	Yes
KLK7	5.4804	37.677	-2.78133	0.000210991	0.000631033	Down	No
KMO	3.56431	29.0544	-3.02706	0.000256449	0.000755901	Down	No
KNOP1	52.9927	385.354	-2.86232	2.8003e-17	4.07907e-16	Down	Yes
KPNA1	60.3799	526.098	-3.12319	2.09462e-32	1.02277e-30	Down	Yes
KPNA4	287.206	2897.56	-3.33468	8.99489e-42	7.08722e-40	Down	No
KPNB1	803.746	2348.5	-1.54692	2.01253e-09	1.21411e-08	Down	Yes
KRI1	25.3873	86.5318	-1.76912	4.71652e-05	0.000156473	Down	No
KRT10	11.326	761.674	-6.07146	8.35817e-36	4.98161e-34	Down	Yes
KRT18	337.925	12671.3	-5.22872	0.000498524	0.00139773	Down	No
KRT24	0.87853	21.0471	-4.58239	0.000674321	0.00185218	Down	No
KRT32	18.602	62.1822	-1.74104	0.00838897	0.0185007	Down	No
KTI12	37.9926	332.021	-3.12748	1.11327e-25	3.31764e-24	Down	Yes
KXD1	27.4444	345.36	-3.65352	2.08453e-11	1.59062e-10	Down	Yes
KYAT3	126.488	475.109	-1.90925	8.62687e-12	6.86749e-11	Down	Yes
LAMTOR2	44.5987	2237.1	-5.64848	3.11928e-37	2.03399e-35	Down	Yes
LAMTOR3	1283.54	6328.52	-2.30174	1.02473e-38	6.98866e-37	Down	Yes
LAP3	278.046	606.3	-1.12471	1.47382e-05	5.27932e-05	Down	Yes
LAPTM4A	1026.48	5200.67	-2.34099	4.21512e-20	7.88478e-19	Down	No
LARGE2	0.843989	21.3009	-4.65755	0.00439165	0.0103059	Down	No
LARP4	2340.73	4801.19	-1.03643	2.75477e-14	2.88384e-13	Down	Yes
LARP7	1236	3164.05	-1.35609	4.57921e-07	2.04097e-06	Down	Yes
LASP1	53.6763	3492.26	-6.02373	2.19641e-13	2.08143e-12	Down	Yes
LAT	6.82182	38.1831	-2.48471	0.000151142	0.000461321	Down	No
LAYN	0.999144	13.9741	-3.80592	0.00120931	0.00317252	Down	No
LCLAT1	148.182	321.699	-1.11834	2.21063e-05	7.71403e-05	Down	Yes
LCP2	4.39119	24.79	-2.49708	0.00587125	0.0134133	Down	No
LCTL	23.5243	94.654	-2.00851	0.00041128	0.00117144	Down	No
LDAH	32.1388	264.733	-3.04215	5.4647e-18	8.52109e-17	Down	Yes
LDHB	2270.28	7319.29	-1.68883	2.67409e-12	2.25929e-11	Down	Yes
LDLR	27.5685	101.253	-1.87687	0.0011788	0.00310342	Down	Yes
LEAP2	0.105681	4.64186	-5.45692	0.0118602	0.0252667	Down	No
LENG1	50.1453	298.013	-2.57119	9.7851e-11	6.85781e-10	Down	No
LENG9	2.2916	20.2732	-3.14514	0.0114637	0.0245274	Down	No
LEPROTL1	42.6729	1333.41	-4.96566	1.2209e-56	2.35148e-54	Down	Yes
LGALS1	170.039	8373.2	-5.62184	6.45328e-49	8.33755e-47	Down	Yes
LHX5	0.4694	12.907	-4.78119	0.00134803	0.00350508	Down	No
LIG1	14.7149	65.3705	-2.15136	0.000166491	0.000505279	Down	No
LIMK2	72.5985	204.035	-1.4908	0.000869369	0.0023458	Down	No
LIMS1	107.873	491.623	-2.18822	1.72038e-11	1.32246e-10	Down	Yes
LIN54	190.624	870.865	-2.19172	7.86473e-20	1.44009e-18	Down	No
LIN7B	2.04518	33.2397	-4.02261	0.000168594	0.000510915	Down	No
LIN9	120.04	655.987	-2.45015	2.72606e-23	6.57829e-22	Down	Yes
LIPG	4.44297	163.686	-5.20326	5.45492e-16	6.88101e-15	Down	Yes
LIPT2	2.11762	18.6248	-3.13671	0.00333598	0.00803844	Down	No
LITAF	95.26	824.665	-3.11387	1.92284e-23	4.71108e-22	Down	Yes
LLPH	969.856	4792.82	-2.30503	1.24378e-16	1.68218e-15	Down	Yes
LMAN1	510.728	1581.16	-1.63036	8.54334e-13	7.59769e-12	Down	Yes
LMAN2L	6.74219	54.4724	-3.01424	7.80857e-06	2.91923e-05	Down	Yes
LMBRD2	436.081	892.091	-1.0326	7.00316e-08	3.49755e-07	Down	No
LMNB2	82.1837	330.847	-2.00924	2.69385e-10	1.79657e-09	Down	No
LMO4	164.746	413.625	-1.32808	0.000114836	0.000357428	Down	Yes
LMTK2	28.9221	170.814	-2.56218	3.71831e-07	1.67958e-06	Down	No
LOC100125545	99.5787	268.675	-1.43196	7.17614e-06	2.70173e-05	Down	No
LOC100151788	1.75606	27.6837	-3.97862	7.63133e-05	0.000244817	Down	No
LOC100152218	0.30014	8.4657	-4.81792	0.012428	0.0263468	Down	No
LOC100152619	76.0242	833.159	-3.45406	1.21443e-44	1.14825e-42	Down	No
LOC100152722	20.9259	109.715	-2.3904	5.92617e-09	3.37172e-08	Down	No
LOC100153087	2.60701	65.4839	-4.65067	5.35627e-05	0.000176151	Down	No
LOC100153150	116.01	311.735	-1.42607	1.90358e-07	8.99101e-07	Down	Yes
LOC100153163	2.79097	17.134	-2.61803	0.0055277	0.0126967	Down	Yes
LOC100154105	64.0301	317.196	-2.30855	5.28473e-16	6.68253e-15	Down	No
LOC100154415	15.2796	137.462	-3.16935	3.5135e-08	1.82346e-07	Down	No
LOC100154655	4.43416	20.2229	-2.18925	0.0117478	0.0250657	Down	No
LOC100154873	1.06731	198.438	-7.53856	4.34887e-13	4.00269e-12	Down	Yes
LOC100155289	66.8244	150.048	-1.16697	0.00266682	0.00654928	Down	No
LOC100155534	2.67532	22.5957	-3.07827	0.00387906	0.00922047	Down	Yes
LOC100155738	75.5735	288.153	-1.93088	0.000185164	0.00055804	Down	No
LOC100156285	0.454004	109.848	-7.91859	3.34794e-07	1.5252e-06	Down	No
LOC100156381	112.86	493.425	-2.12829	4.26507e-11	3.13601e-10	Down	Yes
LOC100156728	0.22289	8.20095	-5.20138	0.00479649	0.0111589	Down	No
LOC100156879	325.088	1129.23	-1.79644	4.71337e-06	1.82371e-05	Down	Yes
LOC100156967	1251.44	5678.76	-2.18199	1.62083e-16	2.16956e-15	Down	Yes
LOC100156978	1.28768	14.8009	-3.52283	0.00787452	0.0174979	Down	No
LOC100157117	0.232356	8.06167	-5.11667	0.0118837	0.0253115	Down	No
LOC100157391	735.384	5123.41	-2.80054	1.07156e-46	1.16091e-44	Down	Yes
LOC100157935	189.06	1583.59	-3.06629	2.58408e-21	5.3272e-20	Down	Yes
LOC100511307	2.06884	12.3389	-2.57632	0.0222435	0.0441747	Down	No
LOC100511343	7.1612	41.1876	-2.52394	0.000221109	0.000658642	Down	No
LOC100511376	894.715	3184.79	-1.8317	7.4866e-20	1.37327e-18	Down	No
LOC100511545	10.5258	48.6105	-2.20734	0.0020692	0.0051951	Down	No
LOC100511905	1.4813	156.608	-6.72415	2.42537e-05	8.39855e-05	Down	No
LOC100512195	1540.59	20947.5	-3.76522	2.4144e-35	1.39894e-33	Down	Yes
LOC100512448	108.039	2513.63	-4.54014	6.78759e-69	2.24109e-66	Down	Yes
LOC100512926	154.567	1093.06	-2.82206	5.10526e-22	1.12138e-20	Down	Yes
LOC100513291	0.277207	6.77609	-4.61142	0.021658	0.0431274	Down	No
LOC100513346	286.081	601.542	-1.07225	0.00142605	0.00369451	Down	Yes
LOC100513367	0.4905	15.3393	-4.96684	0.00249695	0.00616121	Down	No
LOC100513415	216.992	953.187	-2.13512	3.10097e-21	6.34251e-20	Down	Yes
LOC100513741	25.6192	275.478	-3.42664	1.16146e-21	2.4779e-20	Down	Yes
LOC100513751	0.122379	8.23624	-6.07256	0.00214995	0.00537837	Down	No
LOC100514110	557.638	1540.49	-1.46599	1.01902e-05	3.7503e-05	Down	Yes
LOC100514214	0.0688885	23.8467	-8.43531	8.86459e-07	3.81055e-06	Down	No
LOC100514282	90.5583	978.257	-3.4333	2.23742e-24	5.9363e-23	Down	Yes
LOC100514318	0.451977	9.85231	-4.44614	0.00539059	0.0124051	Down	No
LOC100514469	226.107	878.412	-1.95789	2.79798e-15	3.246e-14	Down	Yes
LOC100514656	146.351	392.252	-1.42234	1.0002e-08	5.5451e-08	Down	Yes
LOC100514912	404.501	5029.24	-3.63613	1.05127e-35	6.17727e-34	Down	Yes
LOC100514940	0.721097	21.7877	-4.91717	0.00105606	0.00280408	Down	No
LOC100514947	1.64001	65.1984	-5.31306	5.18778e-09	2.97767e-08	Down	No
LOC100514982	24.8805	107.174	-2.10686	2.38024e-05	8.26015e-05	Down	No
LOC100515126	0.0899354	5.53118	-5.94256	0.0237775	0.0468412	Down	No
LOC100515519	5.01623	307.93	-5.93986	1.68275e-10	1.14764e-09	Down	Yes
LOC100515578	8.37742	28.338	-1.75816	0.0252532	0.0493881	Down	No
LOC100515579	508.107	1181.07	-1.21688	4.00641e-06	1.56238e-05	Down	No
LOC100515643	54.598	348.424	-2.67392	1.31085e-07	6.3294e-07	Down	No
LOC100516797	4.2024	39.3767	-3.22806	1.06381e-05	3.9051e-05	Down	No
LOC100516963	8.97077	29.8795	-1.73585	0.0109023	0.0234663	Down	No
LOC100517149	76.9796	243.235	-1.6598	3.2824e-09	1.92873e-08	Down	Yes
LOC100517194	7.25373	42.206	-2.54065	0.000782032	0.00212752	Down	No
LOC100517372	19.251	115.403	-2.58368	1.23708e-06	5.21218e-06	Down	No
LOC100517779	0.212851	13.2162	-5.95632	0.00065782	0.0018114	Down	No
LOC100517809	106.165	217.084	-1.03195	0.00178923	0.00454209	Down	Yes
LOC100517855	82.1059	724.752	-3.14193	5.46404e-36	3.33306e-34	Down	Yes
LOC100518351	5.23596	70.3642	-3.74832	2.12206e-06	8.63479e-06	Down	Yes
LOC100518491	275.454	1228.57	-2.1571	5.49471e-10	3.53528e-09	Down	Yes
LOC100518848	545.962	3709.35	-2.76429	1.27496e-19	2.28035e-18	Down	Yes
LOC100519221	1.29095	22.9749	-4.15355	8.28747e-06	3.09049e-05	Down	No
LOC100519366	2.803	30.0331	-3.42151	0.00444854	0.0104264	Down	No
LOC100519871	168.3	1236.14	-2.87674	3.40213e-07	1.54785e-06	Down	No
LOC100520228	0.453112	29.9864	-6.0483	0.00119074	0.00313011	Down	No
LOC100520248	13.5649	116.27	-3.09953	1.50963e-07	7.21548e-07	Down	No
LOC100520317	50.4218	164.089	-1.70236	2.84745e-07	1.30982e-06	Down	No
LOC100520389	38.9551	403.165	-3.37149	8.42037e-31	3.67966e-29	Down	Yes
LOC100521069	121.916	1072.72	-3.13731	2.08362e-28	7.49989e-27	Down	Yes
LOC100521229	0.479481	31.1758	-6.02281	1.28334e-06	5.39395e-06	Down	No
LOC100521256	37.0337	170.675	-2.20434	1.7375e-09	1.05523e-08	Down	Yes
LOC100521350	62.2807	325.867	-2.38743	0.0151688	0.0314425	Down	No
LOC100521431	179.454	941.931	-2.39201	2.71362e-15	3.15341e-14	Down	Yes
LOC100521510	8.81954	590.753	-6.06571	8.96932e-38	5.94175e-36	Down	Yes
LOC100521600	40.2196	124.551	-1.63076	0.0203932	0.0409063	Down	No
LOC100521789	8.72692	30.3376	-1.79756	0.0130706	0.0275658	Down	No
LOC100522011	0.110482	7.84642	-6.15015	0.00216555	0.00541415	Down	No
LOC100522498	455.674	1550.04	-1.76624	3.55105e-11	2.64088e-10	Down	Yes
LOC100522603	0.135681	7.04129	-5.69755	0.00879289	0.0192811	Down	No
LOC100522678	736.084	5111.01	-2.79567	5.79559e-24	1.47738e-22	Down	Yes
LOC100522842	641.611	3317.42	-2.37029	8.77272e-36	5.21375e-34	Down	Yes
LOC100522861	12.623	69.4322	-2.45955	5.75722e-07	2.53184e-06	Down	No
LOC100523244	109.04	378.392	-1.79502	2.65965e-07	1.22968e-06	Down	Yes
LOC100523609	0.470823	17.1197	-5.18432	0.00108053	0.00286575	Down	No
LOC100523732	0.736044	54.517	-6.21077	0.000108422	0.000338835	Down	No
LOC100523792	0.258338	22.7041	-6.45755	5.10993e-05	0.000168503	Down	No
LOC100523964	12.8574	67.6884	-2.39631	2.88526e-05	9.88736e-05	Down	Yes
LOC100524239	540.541	10927	-4.33735	3.43992e-33	1.72835e-31	Down	Yes
LOC100524282	14.391	98.0453	-2.76828	0.000458853	0.001297	Down	No
LOC100524308	4345.69	14451.4	-1.73355	2.8363e-15	3.28679e-14	Down	Yes
LOC100524598	214.561	466.102	-1.11926	0.000346351	0.00100034	Down	No
LOC100524613	266.601	3410.08	-3.67705	2.58732e-40	1.89114e-38	Down	Yes
LOC100524999	5.93181	2300.94	-8.59953	8.1454e-08	4.03027e-07	Down	No
LOC100525232	155.443	1090.38	-2.81038	2.88674e-20	5.48375e-19	Down	Yes
LOC100525433	64.7373	216.968	-1.74481	2.82636e-06	1.1254e-05	Down	No
LOC100525452	26.0774	57.0949	-1.13056	0.0110512	0.0237599	Down	No
LOC100525472	59.1689	370.622	-2.64704	1.35479e-14	1.47082e-13	Down	Yes
LOC100525613	12.0411	1123.26	-6.54358	1.86593e-09	1.12862e-08	Down	Yes
LOC100525679	24.6339	669.501	-4.76437	3.66866e-21	7.44506e-20	Down	Yes
LOC100525869	237.808	735.813	-1.62954	1.83941e-06	7.56009e-06	Down	No
LOC100525876	7.22261	66.3904	-3.20038	2.083e-06	8.48745e-06	Down	No
LOC100620152	1.86603	23.9806	-3.68382	5.91975e-05	0.000193398	Down	Yes
LOC100620188	39.781	390.085	-3.29364	1.08628e-17	1.64572e-16	Down	Yes
LOC100620498	13.7359	66.6747	-2.27919	0.000134996	0.000415148	Down	Yes
LOC100620825	0.545102	8.94644	-4.03672	0.0224912	0.0446326	Down	No
LOC100620827	35.4436	746.795	-4.39712	1.84939e-27	6.30641e-26	Down	Yes
LOC100621006	70.6815	411.143	-2.54024	9.87196e-07	4.21483e-06	Down	No
LOC100621115	127.534	745.877	-2.54806	5.40043e-23	1.28529e-21	Down	Yes
LOC100621166	0.0770318	8.06639	-6.71033	0.0007529	0.00205526	Down	No
LOC100621287	413.806	1428.96	-1.78794	5.76033e-11	4.15179e-10	Down	Yes
LOC100621388	88.7856	291.765	-1.71641	2.85099e-09	1.68859e-08	Down	Yes
LOC100621400	3.32032	217.853	-6.03589	4.05732e-15	4.62445e-14	Down	Yes
LOC100621428	0.200079	25.281	-6.98134	3.21321e-05	0.00010932	Down	No
LOC100621771	0.433974	16.4922	-5.24803	0.000279789	0.000820396	Down	No
LOC100621782	103.359	2375.94	-4.52276	9.94017e-86	7.65798e-83	Down	Yes
LOC100621895	1.26304	11.3662	-3.16977	0.0148723	0.0308834	Down	No
LOC100622028	0.800762	68.7955	-6.4248	2.6558e-05	9.15079e-05	Down	No
LOC100622639	0.0828677	6.93521	-6.38699	0.00361065	0.00863575	Down	Yes
LOC100622780	340.682	1439.15	-2.07871	1.70048e-08	9.16839e-08	Down	No
LOC100622980	631.313	1333.44	-1.07873	1.28154e-05	4.63525e-05	Down	Yes
LOC100623167	4513.69	9997.86	-1.14731	0.00326094	0.00786992	Down	Yes
LOC100623255	6.28896	36.8833	-2.55208	0.000794835	0.00215944	Down	No
LOC100623334	0.1034	11.2628	-6.76719	0.000187833	0.000565593	Down	No
LOC100623540	236.686	3372.53	-3.83279	6.18882e-29	2.32371e-27	Down	Yes
LOC100623639	39.8534	108.885	-1.45003	0.000619978	0.00171543	Down	No
LOC100624067	325.931	5986.33	-4.19903	6.15471e-34	3.23293e-32	Down	Yes
LOC100624077	3.10848	17.181	-2.46654	0.0210638	0.0421013	Down	No
LOC100624136	1802.26	3673.57	-1.02738	0.000148335	0.000453553	Down	No
LOC100624226	91.1871	382.026	-2.06677	1.20766e-05	4.39632e-05	Down	No
LOC100624435	13.618	42.0603	-1.62694	0.009814	0.0213157	Down	No
LOC100624460	21.4765	106.632	-2.3118	0.000658082	0.00181188	Down	No
LOC100624495	453.966	1136.93	-1.32449	6.94946e-09	3.92495e-08	Down	Yes
LOC100624681	356.548	2723.04	-2.93305	2.66755e-06	1.06625e-05	Down	Yes
LOC100624700	49.6333	176.262	-1.82834	1.25234e-05	4.5383e-05	Down	No
LOC100624995	3.53771	43.0468	-3.60502	2.02038e-06	8.24848e-06	Down	No
LOC100625049	311.427	2762.6	-3.14906	5.18532e-31	2.31459e-29	Down	Yes
LOC100625694	17.5121	85.9396	-2.29497	1.07449e-05	3.93983e-05	Down	Yes
LOC100626147	22.0476	63.304	-1.52168	0.00304678	0.00739941	Down	No
LOC100626250	35.8681	225.602	-2.65301	6.87629e-07	2.9961e-06	Down	Yes
LOC100626407	1.66784	87.2459	-5.70903	1.28643e-10	8.90484e-10	Down	Yes
LOC100626505	2.25147	33.8252	-3.90916	3.14272e-06	1.24446e-05	Down	Yes
LOC100626988	3.05089	28.0803	-3.20226	0.00157614	0.00404358	Down	No
LOC100627410	455.731	3514.4	-2.94702	6.15705e-29	2.31596e-27	Down	Yes
LOC100627489	1.7645	25.102	-3.83048	0.0160095	0.0330142	Down	No
LOC100628233	36.0124	1828.33	-5.66589	4.07733e-46	4.26193e-44	Down	Yes
LOC100737142	69.6563	151.059	-1.11679	0.00193237	0.00487628	Down	Yes
LOC100737218	54.4746	239.275	-2.13502	4.2308e-16	5.42236e-15	Down	No
LOC100737265	185.13	659.329	-1.83246	8.46929e-16	1.03996e-14	Down	Yes
LOC100737508	1.68738	89.327	-5.72624	0.000293503	0.000857586	Down	No
LOC100737657	44.2495	920.858	-4.37925	1.35974e-26	4.29194e-25	Down	Yes
LOC100737876	0.080519	7.22917	-6.48836	0.00407191	0.00963263	Down	No
LOC100737921	0.159191	9.50881	-5.90043	0.00193404	0.0048799	Down	No
LOC100737926	105.836	1034.89	-3.28958	4.52e-16	5.77521e-15	Down	Yes
LOC100737973	6.51967	81.046	-3.63587	3.92701e-05	0.000131836	Down	Yes
LOC100737977	2.88653	219.726	-6.25022	4.59722e-15	5.20276e-14	Down	Yes
LOC100738134	192.533	474.062	-1.29997	6.82669e-10	4.34788e-09	Down	Yes
LOC100738403	11.405	47.7911	-2.06708	0.00306372	0.00743622	Down	No
LOC100738684	188.613	564.929	-1.58264	0.000150481	0.00045944	Down	Yes
LOC100739087	581.43	4139.97	-2.83194	1.09405e-30	4.71168e-29	Down	Yes
LOC100739163	323.465	3219.28	-3.31505	7.39342e-05	0.000237551	Down	Yes
LOC100739202	34.6727	79.5711	-1.19844	0.00847703	0.0186653	Down	No
LOC100739396	157.471	722.615	-2.19814	3.39934e-17	4.92064e-16	Down	No
LOC100739480	19.606	80.3379	-2.03479	2.17219e-06	8.82322e-06	Down	No
LOC100739557	25.1537	247.477	-3.29846	2.76772e-22	6.23066e-21	Down	Yes
LOC100739613	60.7935	236.81	-1.96174	5.34977e-11	3.87602e-10	Down	Yes
LOC100739719	35.4835	1252.9	-5.14198	1.57075e-06	6.51641e-06	Down	Yes
LOC102157889	517.148	1837.44	-1.82905	5.30153e-10	3.41839e-09	Down	Yes
LOC102158155	1.95146	40.0033	-4.3575	7.32967e-06	2.75555e-05	Down	Yes
LOC102158193	0.225239	13.2239	-5.87555	0.000967368	0.00258707	Down	No
LOC102158569	524.447	1569.16	-1.58113	7.84173e-09	4.4014e-08	Down	No
LOC102158679	52.0993	510.51	-3.2926	0.00247505	0.00611153	Down	No
LOC102159167	78.5112	299.611	-1.93212	9.05432e-10	5.6797e-09	Down	No
LOC102159389	2.51774	136.145	-5.75687	1.26892e-16	1.71506e-15	Down	No
LOC102159535	0.0866548	16.8874	-7.60645	1.23985e-05	4.49932e-05	Down	No
LOC102159768	144.658	1328.75	-3.19936	3.85773e-37	2.49983e-35	Down	Yes
LOC102160218	3.67623	16.6318	-2.17765	0.024311	0.04777	Down	No
LOC102160380	7.69546	36.3458	-2.23971	0.00369817	0.00882376	Down	No
LOC102160410	4.58662	36.4178	-2.98914	0.00821893	0.0181643	Down	No
LOC102160416	8.33923	27.2554	-1.70855	0.0080364	0.0178044	Down	No
LOC102160475	20.4403	487.86	-4.57698	6.35706e-20	1.17436e-18	Down	No
LOC102162044	24.7298	73.264	-1.56685	0.00147872	0.00381717	Down	No
LOC102162486	387.804	1116.68	-1.52582	2.55698e-06	1.026e-05	Down	Yes
LOC102162630	25.3405	103.925	-2.03603	7.0908e-05	0.000228605	Down	No
LOC102163398	41.8022	173.028	-2.04935	6.11193e-07	2.6782e-06	Down	Yes
LOC102164431	0.895397	101.54	-6.82531	7.68429e-06	2.87882e-05	Down	No
LOC102164598	0.590081	14.6285	-4.63173	0.00112247	0.00296601	Down	No
LOC102165602	1.16426	8.70408	-2.90228	0.0213106	0.0425007	Down	No
LOC102165762	6.5724	42.6157	-2.69689	0.00297208	0.00723067	Down	No
LOC102165847	5.21066	58.0872	-3.47868	1.54343e-05	5.50875e-05	Down	No
LOC102166270	13.1375	40.3188	-1.61776	0.00853826	0.0187899	Down	No
LOC102166801	1.96924	20.7367	-3.39647	0.000568505	0.0015801	Down	No
LOC106504178	49.197	105.975	-1.10708	0.00844677	0.0186104	Down	No
LOC106504199	0.231287	9.38518	-5.34263	0.00529551	0.0122147	Down	No
LOC106504240	0.246468	7.11065	-4.85051	0.0126222	0.0267176	Down	No
LOC106504254	1.68044	11.1539	-2.73063	0.0215864	0.0430054	Down	No
LOC106504894	51.1368	128.311	-1.32721	0.00210287	0.00527263	Down	No
LOC106504983	3.94872	20.603	-2.3834	0.0214065	0.0426714	Down	No
LOC106505107	24.6197	163.887	-2.73481	8.26746e-13	7.36495e-12	Down	No
LOC106505207	3.00218	54.6317	-4.18566	1.69105e-08	9.11991e-08	Down	No
LOC106505238	282.213	792.315	-1.48929	2.25419e-08	1.19708e-07	Down	No
LOC106505596	4.5668	785.99	-7.42718	1.4535e-07	6.96643e-07	Down	No
LOC106506010	6.3682	59.8709	-3.2329	2.54217e-06	1.02104e-05	Down	No
LOC106507314	6435.26	18367.9	-1.51312	0.00595209	0.0135824	Down	Yes
LOC106507519	0.0970398	4.51433	-5.53979	0.0112097	0.0240458	Down	No
LOC106507778	13.0262	504.173	-5.27443	1.154e-11	9.05824e-11	Down	Yes
LOC106508100	626.444	1632.65	-1.38196	5.75281e-07	2.53043e-06	Down	Yes
LOC106509418	0.68114	18.3889	-4.75474	0.0116529	0.0248912	Down	No
LOC106510170	29.4799	121.502	-2.04318	0.000761385	0.00207624	Down	No
LOC106510300	98.5598	230.07	-1.223	0.00609177	0.0138698	Down	No
LOC106510534	5.15732	81.4351	-3.98096	3.26271e-08	1.7018e-07	Down	Yes
LOC110255270	6.54267	73.3101	-3.48606	6.74519e-09	3.81683e-08	Down	No
LOC110255287	2.17362	64.5882	-4.8931	1.36065e-10	9.39357e-10	Down	No
LOC110255302	25.8692	89.7187	-1.79417	7.04269e-06	2.65438e-05	Down	No
LOC110255327	0.29348	16.1281	-5.78016	0.000800503	0.00217351	Down	No
LOC110255568	10.6781	36.6795	-1.78032	0.011855	0.0252581	Down	No
LOC110255897	2.55616	23.0432	-3.17229	0.000568994	0.00158125	Down	No
LOC110256092	3.79966	36.1962	-3.2519	1.56207e-05	5.56857e-05	Down	No
LOC110256093	1.29787	52.0612	-5.32599	1.98735e-10	1.34566e-09	Down	No
LOC110256289	0.509786	8.68819	-4.09109	0.0157685	0.032556	Down	No
LOC110256366	2.37423	40.1548	-4.08004	0.0085627	0.018832	Down	No
LOC110256414	15.9003	107.505	-2.75728	1.65496e-06	6.84256e-06	Down	No
LOC110256444	0.234345	8.09174	-5.10975	0.0133433	0.0280811	Down	No
LOC110256469	10.7764	84.8517	-2.97707	0.00204276	0.00513492	Down	No
LOC110256926	1.59976	28.0794	-4.13358	4.11303e-05	0.000137681	Down	No
LOC110257248	109.799	225.776	-1.04003	0.00448621	0.0104993	Down	No
LOC110257311	8.28951	42.1559	-2.34638	0.00344884	0.0082878	Down	No
LOC110257391	3.91206	56.2804	-3.84663	3.24281e-07	1.48054e-06	Down	No
LOC110257570	0.145951	9.63188	-6.04426	0.000641132	0.00176849	Down	No
LOC110257594	473.547	3901.07	-3.04229	8.06054e-06	3.0091e-05	Down	Yes
LOC110257684	52.9931	376.676	-2.82945	3.77174e-16	4.87738e-15	Down	Yes
LOC110257686	0.85817	35.9568	-5.38886	0.000709221	0.00194317	Down	No
LOC110257698	0.0876838	10.6976	-6.93076	0.000298557	0.000871375	Down	No
LOC110257715	0.370326	10.9907	-4.89135	0.0204274	0.040967	Down	No
LOC110257738	0.10519	5.33335	-5.66397	0.01194	0.0254055	Down	No
LOC110257823	16.7797	222.83	-3.73115	0.000502199	0.0014069	Down	No
LOC110258060	50.9183	286.227	-2.49091	3.17047e-10	2.09495e-09	Down	No
LOC110258364	100.871	4630.04	-5.52044	0.000492921	0.00138408	Down	No
LOC110258620	5.96599	98.8773	-4.05081	6.93487e-08	3.46594e-07	Down	No
LOC110259044	0.855306	8.35782	-3.28861	0.0255508	0.0498857	Down	No
LOC110259328	0.832217	14.4077	-4.11373	0.0206898	0.0414494	Down	No
LOC110259370	62.3534	1197.77	-4.26374	3.50315e-61	8.09655e-59	Down	Yes
LOC110259374	98.7918	321.631	-1.70294	5.39041e-08	2.73411e-07	Down	No
LOC110259440	17.7809	82.3813	-2.21199	4.04838e-05	0.000135626	Down	No
LOC110259671	30.7183	66.4897	-1.11403	0.0126404	0.0267508	Down	No
LOC110259864	78.3326	419.193	-2.41993	0.0128475	0.0271475	Down	No
LOC110259948	2.86643	26.5028	-3.20882	0.000182649	0.000550779	Down	No
LOC110259967	0.344668	55.5704	-7.33297	1.6842e-08	9.08967e-08	Down	No
LOC110260076	22.9717	139.288	-2.60014	9.26277e-07	3.97022e-06	Down	No
LOC110260088	271.672	2016.93	-2.89222	2.113e-49	2.81747e-47	Down	Yes
LOC110260093	95.4751	289.035	-1.59805	3.35181e-11	2.50434e-10	Down	Yes
LOC110260117	0.0561834	13.3229	-7.88955	2.41614e-05	8.37077e-05	Down	No
LOC110260465	21.9946	71.836	-1.70755	0.00846691	0.0186489	Down	Yes
LOC110260999	12.8095	52.7486	-2.04192	0.000632947	0.00174777	Down	No
LOC110261040	0.22052	28.6642	-7.0222	8.31104e-06	3.09706e-05	Down	Yes
LOC110261138	1.71913	27.6615	-4.00813	3.31345e-06	1.30908e-05	Down	No
LOC110261249	274.011	6724.08	-4.61703	1.71564e-58	3.53337e-56	Down	Yes
LOC110261289	156.84	375.929	-1.26117	7.2531e-06	2.72923e-05	Down	Yes
LOC110261292	99.4706	586.755	-2.56042	1.03884e-19	1.87252e-18	Down	Yes
LOC110261293	16.8265	62.0123	-1.88182	9.7776e-05	0.000308094	Down	Yes
LOC110261296	61.6717	168.753	-1.45223	1.35899e-05	4.90088e-05	Down	Yes
LOC110261309	9.39849	158.57	-4.07655	3.12747e-17	4.53974e-16	Down	No
LOC110261311	72.3207	155.975	-1.10883	0.000922851	0.00247949	Down	No
LOC110261312	87.7197	252.981	-1.52806	7.59331e-09	4.26772e-08	Down	No
LOC110261313	4.67587	36.0684	-2.94743	0.000825878	0.00223715	Down	No
LOC110261314	15.9552	149.902	-3.23192	2.28452e-11	1.73305e-10	Down	No
LOC110261317	2.98436	87.4021	-4.87217	1.19813e-13	1.17006e-12	Down	No
LOC110261321	129.076	445.333	-1.78666	2.36932e-12	2.01242e-11	Down	Yes
LOC110261322	40.5482	453.824	-3.48442	2.88737e-22	6.48597e-21	Down	Yes
LOC110261323	1.78174	22.9002	-3.684	0.00149493	0.00385473	Down	No
LOC110261324	28.2291	70.0377	-1.31095	0.00440487	0.0103345	Down	No
LOC110261326	2.69581	95.0181	-5.13941	7.72936e-15	8.57485e-14	Down	Yes
LOC110261334	0.438554	50.2996	-6.84165	2.72243e-06	1.08693e-05	Down	No
LOC110261353	57.0576	254.189	-2.15541	1.0808e-10	7.5417e-10	Down	Yes
LOC110261361	0.116719	6.0008	-5.68404	0.0039837	0.00944115	Down	No
LOC110261362	13.0569	303.267	-4.53771	6.58028e-31	2.91226e-29	Down	No
LOC110261380	105.026	2025.09	-4.26917	5.9803e-29	2.25356e-27	Down	Yes
LOC110261383	25.671	147.788	-2.52532	3.73174e-12	3.1e-11	Down	No
LOC110261607	1.5553	13.8291	-3.15244	0.0147047	0.0305842	Down	No
LOC110261685	248.097	761.144	-1.61726	1.23062e-11	9.63421e-11	Down	Yes
LOC110261738	1.07391	14.4658	-3.7517	0.00828182	0.0182896	Down	Yes
LOC110261945	242.606	2526.41	-3.3804	4.51723e-17	6.42261e-16	Down	Yes
LOC110261946	20.2177	80.0849	-1.98591	3.36703e-06	1.32899e-05	Down	No
LOC110261963	0.234362	5.1416	-4.45541	0.0254038	0.0496359	Down	No
LOC110262006	189.709	603.976	-1.67071	1.00306e-06	4.27905e-06	Down	Yes
LOC110262090	193.644	432.485	-1.15924	7.03825e-07	3.06217e-06	Down	No
LOC110262115	0.250441	23.2768	-6.53828	0.00024475	0.000724086	Down	No
LOC110262272	64.0381	12764.9	-7.63904	4.97013e-67	1.54304e-64	Down	Yes
LOC641352	9.3745	198.033	-4.40086	1.27248e-21	2.70367e-20	Down	Yes
LOC733579	2.3463	17.2614	-2.87909	0.0167572	0.0343551	Down	No
LOC733637	3426.74	8393.06	-1.29236	6.44985e-09	3.65667e-08	Down	Yes
LONRF3	6.25421	33.6655	-2.42837	0.00205826	0.00516887	Down	No
LOX	5.69462	26.7376	-2.2312	0.00441534	0.0103567	Down	No
LOXHD1	0.576994	13.476	-4.54569	0.00109198	0.00289353	Down	No
LOXL3	2.42968	48.1751	-4.30945	0.0085129	0.0187383	Down	No
LPAR1	133.993	303.847	-1.18119	3.00595e-05	0.000102739	Down	Yes
LPAR2	8.60632	96.5896	-3.4884	2.62953e-05	9.06176e-05	Down	Yes
LPAR5	0.302243	9.34988	-4.95117	0.0103059	0.022284	Down	No
LPCAT3	45.4703	768.259	-4.0786	3.74351e-28	1.32655e-26	Down	Yes
LPCAT4	6.5182	128.628	-4.30258	3.89261e-11	2.87945e-10	Down	No
LPIN1	22.6856	117.214	-2.36929	3.62825e-05	0.000122547	Down	No
LPL	4.76941	31.3086	-2.71468	0.000461313	0.00130307	Down	No
LRIF1	176.582	525.4	-1.57308	2.9198e-08	1.53061e-07	Down	Yes
LRIG1	30.6597	67.4193	-1.13682	0.00317474	0.00768597	Down	No
LRIT3	1.79699	36.0875	-4.32785	4.5844e-06	1.77679e-05	Down	No
LRP12	9.16644	192.204	-4.39013	8.13978e-10	5.13361e-09	Down	No
LRP2	331.265	10752.3	-5.02052	1.29306e-32	6.3436e-31	Down	No
LRPAP1	45.404	551.428	-3.60228	3.10553e-06	1.23091e-05	Down	Yes
LRRC14	5.55241	35.6567	-2.68299	0.000747089	0.00204047	Down	No
LRRC29	8.96153	173.156	-4.27219	7.92645e-12	6.34879e-11	Down	No
LRRC4	2.6534	17.7108	-2.73872	0.00830721	0.0183379	Down	No
LRRC41	13.8178	106.37	-2.94449	1.94573e-09	1.17552e-08	Down	No
LRRC47	31.8157	102.763	-1.6915	9.58528e-05	0.000302555	Down	No
LRRC57	22.9329	642.436	-4.80806	2.35754e-36	1.4595e-34	Down	Yes
LRRC58	48.0737	232.496	-2.27388	6.86775e-07	2.99363e-06	Down	No
LRRD1	2.2253	23.9347	-3.42703	0.000577036	0.00160146	Down	No
LRRN3	4.85023	518.916	-6.74131	9.61248e-15	1.05849e-13	Down	Yes
LRRTM2	6.2372	39.4119	-2.65966	0.00575618	0.0131706	Down	No
LSG1	264.459	1242.53	-2.23217	8.61531e-28	3.00179e-26	Down	Yes
LSM1	126.873	354.706	-1.48324	4.16827e-09	2.42258e-08	Down	Yes
LSM12	256.493	824.04	-1.68379	2.54815e-08	1.34279e-07	Down	Yes
LSM14A	495.886	1038.93	-1.06702	4.17154e-05	0.00013946	Down	Yes
LSM14B	56.0748	117.83	-1.07128	0.00104045	0.00276509	Down	No
LSM2	133.938	448.455	-1.7434	1.05619e-10	7.38484e-10	Down	Yes
LSM4	281.759	593.615	-1.07506	0.00134114	0.00348843	Down	Yes
LSM5	408.077	5045.17	-3.62799	2.14747e-28	7.71494e-27	Down	Yes
LSM8	1137.3	2798.15	-1.29886	1.76862e-15	2.10705e-14	Down	No
LSMEM1	0.136662	13.6725	-6.64452	0.000163813	0.000497733	Down	No
LTBP2	6.48252	53.1799	-3.03626	0.015183	0.0314658	Down	No
LUC7L	24.6587	140.31	-2.50845	6.63272e-08	3.32131e-07	Down	Yes
LUC7L3	1404.61	3319.05	-1.2406	2.45379e-07	1.14084e-06	Down	Yes
LY6G6C	121.865	247.072	-1.01965	0.0172667	0.0352329	Down	Yes
LY6G6D	0.283537	16.9376	-5.90055	0.000431018	0.00122314	Down	Yes
LYAR	894.136	3122.9	-1.80432	1.37845e-11	1.0735e-10	Down	Yes
LYPD4	11.3781	32.8506	-1.52966	0.0117849	0.0251294	Down	Yes
LYRM4	49.5064	99.0744	-1.0009	0.00675654	0.0152185	Down	No
LYRM9	14.8256	95.2803	-2.68409	0.000265177	0.000780192	Down	No
LYSMD3	57.1622	525.174	-3.19966	1.59207e-18	2.59331e-17	Down	Yes
MAD1L1	4.14684	40.1784	-3.27634	9.58334e-06	3.54325e-05	Down	No
MAD2L1	2289.61	10312.2	-2.17118	2.38591e-40	1.75369e-38	Down	Yes
MAD2L1BP	96.2289	450.278	-2.22627	8.19421e-18	1.25699e-16	Down	Yes
MAFB	2.03997	30.3854	-3.89676	0.00162494	0.00415749	Down	No
MAFK	5.69057	31.036	-2.4473	0.0151593	0.031426	Down	No
MAGEH1	2.16744	46.2505	-4.41541	0.0058278	0.0133199	Down	No
MAGOHB	46.5445	986.639	-4.40584	1.23698e-30	5.30524e-29	Down	Yes
MAIP1	106.648	351.803	-1.72192	3.76252e-09	2.19782e-08	Down	Yes
MAK	50.8974	226.575	-2.15433	5.32861e-09	3.05262e-08	Down	Yes
MALSU1	58.6605	882.997	-3.91195	2.83954e-28	1.01139e-26	Down	Yes
MALT1	92.1536	394.12	-2.09652	9.7046e-14	9.57616e-13	Down	No
MAMSTR	4.96974	37.9371	-2.93237	1.79881e-06	7.40494e-06	Down	Yes
MAN1A1	39.143	218.28	-2.47935	1.0182e-16	1.39339e-15	Down	No
MAN1B1	0.239825	6.56454	-4.77464	0.0211029	0.0421592	Down	No
MANEAL	95.0649	277.24	-1.54415	5.88387e-06	2.23912e-05	Down	No
MAOA	11.6599	61.0361	-2.3881	0.000274791	0.000806422	Down	No
MAP1A	7.28849	32.1146	-2.13954	0.00357382	0.00855257	Down	No
MAP1B	531.647	1184.55	-1.1558	0.000139022	0.000426707	Down	Yes
MAP1LC3B	327.822	6931.37	-4.40215	2.22644e-60	4.92683e-58	Down	Yes
MAP2K2	23.2587	182.662	-2.97333	4.78214e-11	3.49266e-10	Down	No
MAP3K1	9.30471	1094.07	-6.87753	2.59808e-51	3.83281e-49	Down	Yes
MAP3K12	254.099	587.884	-1.21014	0.00121286	0.00318143	Down	No
MAP3K2	16.1427	643.753	-5.31755	1.22899e-23	3.05427e-22	Down	No
MAP3K21	32.5633	148.172	-2.18596	4.18409e-08	2.15322e-07	Down	No
MAP3K7	293.68	724.068	-1.30188	2.13131e-08	1.13588e-07	Down	No
MAP3K8	2.88642	38.1085	-3.72276	0.00595401	0.0135844	Down	No
MAP6	0.332726	7.86044	-4.5622	0.0182694	0.0370499	Down	No
MAPK1	346.038	790.704	-1.19221	0.000512022	0.00143326	Down	No
MAPK1IP1L	443.702	1704.51	-1.94169	1.05362e-25	3.14438e-24	Down	Yes
MAPK8IP2	1.25764	20.6172	-4.03506	0.000664969	0.00182891	Down	No
MAPKAPK2	32.7904	167.039	-2.34884	1.84854e-11	1.41678e-10	Down	No
MAPKAPK5	189.784	390.112	-1.03953	0.000465098	0.00131304	Down	No
MARCH11	1.44386	37.11	-4.68381	1.72634e-06	7.11643e-06	Down	No
MARCH2	14.3906	56.6914	-1.978	0.00114405	0.00301843	Down	No
MARCH7	664.937	2000.15	-1.58882	4.73846e-13	4.34589e-12	Down	Yes
MARCKS	1205.19	5427.52	-2.17103	8.38816e-12	6.68417e-11	Down	Yes
MARK3	120.884	660.823	-2.45064	6.39437e-27	2.08479e-25	Down	Yes
MARS	199.814	664.321	-1.73322	2.18815e-07	1.02443e-06	Down	No
MARS2	38.1587	312.003	-3.03148	8.3798e-23	1.97181e-21	Down	No
MASP2	71.6896	161.899	-1.17526	0.00233477	0.00579819	Down	No
MAST3	30.2166	103.766	-1.77993	9.38898e-05	0.000296901	Down	Yes
MAT2A	445.71	1069.41	-1.26264	4.20978e-06	1.638e-05	Down	Yes
MATR3	2900.2	6785.25	-1.22625	2.81583e-09	1.66872e-08	Down	Yes
MBD3	7.07451	89.597	-3.66275	4.83028e-09	2.78632e-08	Down	Yes
MBIP	147.544	1368.71	-3.2136	6.6438e-26	2.01454e-24	Down	Yes
MBLAC1	19.7663	52.4118	-1.40685	0.0092413	0.0201645	Down	Yes
MBLAC2	8.58836	41.6633	-2.27832	0.00065004	0.00179164	Down	No
MBNL1	87.1111	300.984	-1.78876	2.06358e-09	1.24239e-08	Down	Yes
MCAM	267.089	2060.55	-2.94764	2.41611e-20	4.60655e-19	Down	Yes
MCFD2	410.784	1333.63	-1.69891	2.04193e-09	1.22971e-08	Down	Yes
MCL1	207.725	1885.12	-3.18191	5.66881e-34	2.99282e-32	Down	Yes
MCM8	88.6929	810.287	-3.19154	2.78037e-25	8.12281e-24	Down	Yes
MCOLN2	153.508	332.964	-1.11705	0.0134309	0.0282397	Down	Yes
MCPH1	179.296	430.878	-1.26494	5.33556e-07	2.35537e-06	Down	Yes
MCRIP2	24.5072	131.55	-2.42433	0.000113948	0.000354826	Down	Yes
MDH1	379.839	1124.73	-1.56612	1.52521e-06	6.3477e-06	Down	Yes
MDK	1.68751	439.238	-8.02396	3.97784e-07	1.7902e-06	Down	Yes
MDM2	529.453	2764.57	-2.38448	8.69346e-20	1.58486e-18	Down	Yes
MDN1	321.69	776.084	-1.27054	3.05955e-13	2.85516e-12	Down	No
MECOM	5.46754	23.217	-2.08622	0.0128517	0.0271528	Down	No
MED10	65.718	1200.29	-4.19095	6.82857e-36	4.10523e-34	Down	Yes
MED13L	728.379	2637.15	-1.85622	1.31343e-18	2.15463e-17	Down	No
MED18	26.0085	471.536	-4.18032	1.85286e-24	4.94753e-23	Down	Yes
MED19	50.5652	399.632	-2.98245	7.0822e-24	1.79218e-22	Down	Yes
MED20	26.7738	181.787	-2.76335	3.6703e-11	2.72178e-10	Down	No
MED26	53.2808	194.709	-1.86963	2.69979e-06	1.07873e-05	Down	Yes
MED29	17.6997	57.4096	-1.69757	0.0138463	0.0290048	Down	No
MED30	170.725	585.932	-1.77905	6.60981e-17	9.23996e-16	Down	Yes
MED31	290.824	2412.69	-3.05242	5.69434e-25	1.60499e-23	Down	Yes
MED8	49.5168	1043.01	-4.39669	1.41368e-49	1.92196e-47	Down	Yes
MED9	0.496353	39.2738	-6.30606	4.63913e-05	0.000154077	Down	Yes
MEGF11	7.06618	73.4561	-3.37788	7.096e-09	4.00119e-08	Down	No
MEI1	13.2097	165.58	-3.64786	2.73848e-18	4.37841e-17	Down	No
MEPCE	116.904	561.174	-2.26312	3.09542e-20	5.86944e-19	Down	Yes
MESDC2	438.745	969.689	-1.14414	5.58565e-05	0.000183174	Down	Yes
METAP1	22.99	553.92	-4.5906	4.91295e-35	2.76949e-33	Down	Yes
METRN	8.57391	94.9409	-3.469	0.00109579	0.00290289	Down	No
METTL13	14.5494	102.349	-2.81447	1.09739e-09	6.81781e-09	Down	Yes
METTL17	56.3707	128.63	-1.19021	0.00290957	0.00709186	Down	Yes
METTL23	942.929	3864.25	-2.03497	3.12352e-24	8.1317e-23	Down	Yes
METTL26	2.33958	109.69	-5.55104	2.5486e-08	1.34279e-07	Down	Yes
METTL2A	107.228	821.409	-2.93742	9.40546e-23	2.19577e-21	Down	Yes
METTL5	153.703	1289.41	-3.06849	8.18013e-35	4.5496e-33	Down	Yes
MEX3B	9.05311	97.0781	-3.42266	0.000410265	0.00116908	Down	No
MFAP3	348.431	954.401	-1.45372	1.6735e-11	1.28832e-10	Down	No
MFAP5	39.0321	216.17	-2.46944	0.000252291	0.0007447	Down	No
MFN1	1830.05	7191.04	-1.97432	1.56242e-21	3.30619e-20	Down	Yes
MFSD14A	249.182	860.759	-1.78841	5.32169e-16	6.72517e-15	Down	No
MFSD14B	194.896	480.686	-1.30239	2.59202e-05	8.94139e-05	Down	Yes
MFSD2A	28.0301	695.116	-4.63221	7.51228e-13	6.74419e-12	Down	Yes
MGA	531.751	2444.55	-2.20075	1.64714e-28	6.01089e-27	Down	Yes
MGAT2	19.4272	378.826	-4.28539	1.29039e-18	2.12018e-17	Down	Yes
MGEA5	275.058	1591.66	-2.53272	8.76403e-23	2.05757e-21	Down	Yes
MICAL1	6.35024	32.5101	-2.35601	0.0020321	0.00510875	Down	No
MICU3	18.5644	190.957	-3.36264	4.32473e-09	2.50651e-08	Down	No
MID1IP1	63.1671	1117.68	-4.14519	7.93175e-12	6.35059e-11	Down	No
MIEF1	44.3092	310.324	-2.8081	4.55896e-16	5.81785e-15	Down	Yes
MIF	847.259	1840.45	-1.11919	6.06583e-05	0.000197922	Down	Yes
MINOS1	3232.35	7910.02	-1.2911	3.04443e-08	1.59354e-07	Down	Yes
MIOX	7.07395	704.795	-6.63854	1.00259e-19	1.80875e-18	Down	Yes
MIS12	740.987	2485.13	-1.7458	4.48785e-14	4.59182e-13	Down	Yes
MITF	47.3868	98.7391	-1.05914	0.00860332	0.0189133	Down	No
MKKS	913.769	3249.57	-1.83035	4.36837e-18	6.86302e-17	Down	Yes
MKRN1	209.844	922.913	-2.13688	4.75442e-27	1.57229e-25	Down	Yes
MMD	50.5559	219.921	-2.12103	1.68699e-06	6.96389e-06	Down	No
MMP12	0.33332	19.5353	-5.87303	0.00233295	0.00579504	Down	No
MOB1A	94.8996	1544.17	-4.02429	3.65158e-47	4.15063e-45	Down	Yes
MOB1B	119.166	488.345	-2.03493	7.58906e-10	4.8011e-09	Down	No
MOB2	0.157702	6.89075	-5.44939	0.0111648	0.0239619	Down	No
MOBKL3	443.456	1918.37	-2.11302	1.75313e-15	2.08979e-14	Down	No
MOCS3	164.235	615.201	-1.90529	1.90471e-23	4.67217e-22	Down	Yes
MOG	1.58883	84.4089	-5.73136	2.70855e-07	1.25035e-06	Down	No
MON2	187.166	708.943	-1.92135	2.42819e-16	3.19879e-15	Down	No
MORN3	0.644298	23.9795	-5.21793	0.000844824	0.0022849	Down	No
MORN5	35.2184	102.925	-1.54719	0.000165889	0.000503672	Down	No
MOSPD1	170.105	4476.97	-4.71803	1.42971e-42	1.17084e-40	Down	Yes
MOV10L1	1.69555	124.437	-6.19752	1.17966e-19	2.11536e-18	Down	No
MPC1L	47.0003	188.584	-2.00447	1.66055e-08	8.97171e-08	Down	No
MPHOSPH10	126.15	2075.68	-4.04038	7.36717e-35	4.13058e-33	Down	Yes
MPHOSPH8	574.229	1526.72	-1.41074	1.05927e-11	8.33987e-11	Down	Yes
MPL	2.15277	20.1485	-3.22641	0.000990687	0.00264332	Down	No
MPV17L	45.8282	162.855	-1.82928	2.43609e-07	1.13312e-06	Down	No
MPV17L2	1.98532	72.2098	-5.18476	0.000614966	0.00170218	Down	No
MPZL2	240.779	3815.84	-3.98622	1.20036e-32	5.91676e-31	Down	Yes
MPZL3	33.7055	672.294	-4.31804	1.98595e-44	1.84418e-42	Down	Yes
MREG	2.15487	223.472	-6.69635	5.044e-06	1.94189e-05	Down	No
MRI1	20.0772	56.244	-1.48614	0.00357307	0.00855177	Down	Yes
MRM1	6.2632	56.5631	-3.17489	6.60008e-06	2.49433e-05	Down	Yes
MRM3	67.3909	221.068	-1.71386	4.2813e-09	2.48341e-08	Down	Yes
MRPL1	418.039	4678.2	-3.48424	8.16224e-52	1.23031e-49	Down	Yes
MRPL10	19.7814	195.991	-3.30857	8.87612e-07	3.81472e-06	Down	Yes
MRPL12	10.3812	61.1802	-2.55909	0.00293024	0.00713722	Down	Yes
MRPL13	1521.83	3307.09	-1.11976	3.51579e-06	1.38298e-05	Down	Yes
MRPL14	87.5444	334.317	-1.93313	2.12659e-06	8.64982e-06	Down	Yes
MRPL17	53.6066	2387.19	-5.47676	1.65214e-49	2.23157e-47	Down	Yes
MRPL19	452.57	1494.74	-1.72368	8.90359e-12	7.07129e-11	Down	Yes
MRPL20	438.089	1606.81	-1.8749	3.21877e-16	4.19246e-15	Down	Yes
MRPL22	446.996	3177.75	-2.82967	2.87391e-41	2.21408e-39	Down	Yes
MRPL23	1.78149	1291.64	-9.50191	1.842e-11	1.41229e-10	Down	No
MRPL24	269.901	961.275	-1.83252	7.35343e-08	3.66281e-07	Down	Yes
MRPL27	43.4255	1043.43	-4.58664	4.16355e-44	3.83212e-42	Down	Yes
MRPL28	6.23134	236.918	-5.2487	6.64391e-17	9.28139e-16	Down	Yes
MRPL30	151.648	2253.14	-3.89313	8.47279e-22	1.83014e-20	Down	No
MRPL32	296.381	3138.52	-3.40456	2.81374e-43	2.41854e-41	Down	Yes
MRPL33	1394.79	3164.56	-1.18196	7.2526e-05	0.000233495	Down	Yes
MRPL35	811.123	3203.6	-1.9817	3.8002e-33	1.90019e-31	Down	Yes
MRPL36	38.4375	400.492	-3.38119	2.317e-17	3.40607e-16	Down	Yes
MRPL38	14.8109	120.236	-3.02115	2.47526e-06	9.95705e-06	Down	Yes
MRPL39	328.629	2315.48	-2.81678	7.44521e-32	3.51174e-30	Down	Yes
MRPL4	167.409	378.211	-1.17581	0.000435369	0.00123498	Down	Yes
MRPL40	261.421	828.812	-1.66467	5.15057e-09	2.95958e-08	Down	Yes
MRPL41	106.34	569.717	-2.42156	1.88842e-12	1.6185e-11	Down	Yes
MRPL42	454.7	11319.1	-4.6377	1.2857e-78	7.86586e-76	Down	Yes
MRPL45	199.735	610.624	-1.61219	1.10225e-07	5.38213e-07	Down	Yes
MRPL46	140.051	1660.16	-3.5673	1.23209e-43	1.09524e-41	Down	Yes
MRPL47	568.69	3720.66	-2.70984	4.07725e-28	1.44236e-26	Down	Yes
MRPL48	81.5391	797.321	-3.2896	7.47373e-44	6.75918e-42	Down	Yes
MRPL49	127.493	1335.81	-3.38922	3.05772e-53	5.0479e-51	Down	Yes
MRPL50	647.63	2070.56	-1.67678	3.99792e-14	4.11279e-13	Down	Yes
MRPL51	652.02	3494.46	-2.42208	2.37001e-33	1.2083e-31	Down	Yes
MRPL53	301.648	1252.41	-2.05376	2.25179e-16	2.97206e-15	Down	Yes
MRPL55	121.561	1581.16	-3.70123	3.71333e-29	1.41726e-27	Down	Yes
MRPL9	253.909	749.654	-1.56191	2.40984e-06	9.72398e-06	Down	Yes
MRPS11	26.9382	748.591	-4.79645	7.83046e-41	5.92296e-39	Down	Yes
MRPS15	82.1919	1049.6	-3.6747	5.05806e-25	1.43107e-23	Down	Yes
MRPS18A	21.6799	464.823	-4.42225	1.4455e-14	1.55972e-13	Down	Yes
MRPS18C	388.404	5077.58	-3.70851	5.27856e-46	5.35607e-44	Down	Yes
MRPS21	869.52	2493.99	-1.52016	3.11056e-12	2.60899e-11	Down	Yes
MRPS30	458.476	1128.72	-1.29977	1.38547e-07	6.65262e-07	Down	Yes
MRPS31	910.917	2605.34	-1.51608	1.15245e-11	9.04953e-11	Down	Yes
MRPS34	22.4956	132.702	-2.56048	6.19746e-07	2.7134e-06	Down	Yes
MRPS6	285.913	2311.66	-3.01528	9.07302e-23	2.12531e-21	Down	Yes
MRPS7	208.314	623.315	-1.5812	5.17663e-06	1.98964e-05	Down	Yes
MRTO4	25.1814	631.356	-4.64802	6.37851e-39	4.42265e-37	Down	Yes
MS4A12	0.21055	21.8186	-6.69526	6.38225e-05	0.000207399	Down	Yes
MSANTD2	30.9378	134.865	-2.12407	3.43059e-06	1.35151e-05	Down	No
MSS51	0.403086	10.3633	-4.68426	0.00938371	0.0204431	Down	No
MSTO1	20.3697	99.1863	-2.28372	2.53304e-07	1.17506e-06	Down	Yes
MSX2	146.827	1129.73	-2.94379	1.95355e-06	7.99446e-06	Down	No
[truncated: 18,568 more rows]

## Sheet: Fig. 6
Supplemental Table S5. Differentially expressed genes between siKDM5B/C and Ctrl IVF 4-cell embryos, SCNT 4-cell embryos and IVF 4-cell embryos, and GSK126-treated IVF blastocyst and untreated blastocyst
Gene	IVF 4C_normalized	SCNT 4C_normalized	log2FoldChange	pvalue	padj	Status
ACTR1B	201.566	76.4135	1.39935	0.000828442	0.0273441	Down
ADAMTS1	298.794	80.1491	1.89839	0.00146951	0.0409284	Down
APOA1	34.8831	0.668597	5.70525	0.000429529	0.0174892	Down
APOD	58.8508	11.3565	2.37354	0.00141035	0.0396376	Down
ARMCX2	34.2241	2.6399	3.69646	2.70722e-05	0.00251367	Down
BCL2L15	192.816	67.4022	1.51636	0.00149707	0.041315	Down
BMP4	4107.39	1299.68	1.66006	7.58466e-05	0.00523289	Down
BTLA	8.69879	0.0924632	6.55579	0.000980314	0.0307106	Down
C1S	195.222	3.30824	5.88291	3.58721e-05	0.00293324	Down
C4A	23.9908	0.504349	5.57191	0.000933392	0.0298175	Down
C9H11orf71	96.161	30.7732	1.64378	0.00190164	0.0485672	Down
CCSAP	363.996	166.881	1.1251	0.000696472	0.024537	Down
CD200R1	205.018	38.0441	2.43001	0.000761432	0.0260407	Down
CLDN8	2390.51	598.037	1.99901	0.00040682	0.0168406	Down
COCH	598.474	293.068	1.03005	0.0014707	0.0409284	Down
DCN	247.082	27.3098	3.1775	0.000940604	0.0299473	Down
DHX15	1771.49	698.348	1.34295	0.000721523	0.0251962	Down
DIS3	1163.8	555.509	1.06696	0.000265641	0.0125925	Down
DMRTB1	24.0076	0.885171	4.76139	0.000195457	0.0100615	Down
DNAAF4	178.57	83.7964	1.09153	0.000580748	0.0217059	Down
DSG1	152.004	23.884	2.66999	0.00026511	0.0125925	Down
GLRX	9613.28	4375.09	1.13572	0.000489236	0.0193651	Down
GRK2	141.414	13.3101	3.40933	0.00131034	0.0376794	Down
HNF4A	27.2405	0.310288	6.456	2.689e-05	0.00250847	Down
HSPA2	332.091	142.394	1.22169	0.000395302	0.0165014	Down
INTS4	1154.63	562.932	1.0364	0.000489244	0.0193651	Down
ITGB5	409.393	114.434	1.83897	2.4068e-05	0.0022665	Down
KIAA0391	817.837	341.342	1.2606	0.00034494	0.0151636	Down
KLF17	3472.25	938.535	1.88739	0.000300563	0.0137334	Down
KLRD1	16.9517	0.851007	4.31612	0.0009265	0.0297889	Down
LMO4	1266.83	543.949	1.21968	0.000243956	0.0119101	Down
LMX1A	140.342	51.8911	1.43539	2.10561e-07	6.64103e-05	Down
LOC100152878	33.4425	6.09497	2.45599	0.000511056	0.0201083	Down
LOC100514110	6806.1	2108.76	1.69043	0.000100901	0.00628496	Down
LOC100515441	32.1117	3.52509	3.18737	0.00121182	0.0354101	Down
LOC100515902	71.3673	7.7045	3.21149	0.000653296	0.023559	Down
LOC100522887	291.439	35.9438	3.01938	3.44541e-07	9.63726e-05	Down
LOC100627466	69.6502	3.54992	4.29427	1.04335e-07	4.06498e-05	Down
LOC102162366	108.452	5.29319	4.35678	7.19577e-06	0.000980978	Down
LOC102163658	2168.44	530.116	2.03227	0.000757565	0.0259531	Down
LOC106505872	3451.89	762.199	2.17915	1.66295e-05	0.00180561	Down
LOC106507314	5292.63	1576.09	1.74764	0.0015103	0.0415072	Down
LOC110255186	145.949	63.3296	1.20451	0.000852026	0.0278583	Down
LOC110261326	503.209	101.668	2.30729	0.000241539	0.0118211	Down
MEIOC	74.9924	20.202	1.89224	0.000781923	0.0265586	Down
MGP	58.6763	1.06203	5.78788	7.26794e-07	0.000165993	Down
MROH2A	10.4545	0.241955	5.43325	0.000376781	0.015929	Down
MYLK	762.554	302.352	1.33461	2.29322e-05	0.00220062	Down
NPR2	207.001	77.084	1.42513	0.000588292	0.0218085	Down
NXPE2	109.542	32.5477	1.75085	0.00189779	0.0485672	Down
PCGF1	1150.22	545.876	1.07526	0.00154261	0.0417663	Down
PCSK6	314.851	71.6282	2.13607	0.000266806	0.0125925	Down
PDGFRB	742.836	18.7824	5.30559	5.05404e-05	0.00380393	Down
PLCD3	242.81	86.7546	1.48481	0.0012082	0.0354101	Down
PNCK	205.527	2.48188	6.37175	3.56077e-06	0.000570585	Down
PNLIPRP3	11.6965	0.0939639	6.95976	0.000136873	0.00797556	Down
PRKD1	90.9611	25.9041	1.81207	0.000159329	0.00872042	Down
RC3H1	802.32	382.238	1.06971	7.8521e-05	0.00534319	Down
SI	26.2411	2.56929	3.35239	0.000371473	0.0158297	Down
SLITRK6	99.5561	25.5111	1.96439	0.00190407	0.0485672	Down
SPTA1	158.577	15.5809	3.34733	6.24462e-06	0.00088373	Down
SUMO3	248.878	10.303	4.5943	0.00112933	0.0339995	Down
SYCP1	615.935	228.099	1.43312	7.61158e-05	0.00523329	Down
TBC1D22B	352.909	174.757	1.01394	0.000789472	0.0266633	Down
TEX11	44.533	8.49145	2.39079	0.000799346	0.0268514	Down
TRIM24	468.052	214.152	1.12803	2.85432e-05	0.00253307	Down
TTC39C	193.912	68.7347	1.49629	0.000379222	0.0159982	Down
TTC7B	123.25	13.0604	3.23831	0.00160944	0.0429832	Down
USP50	72.9482	27.6856	1.39774	0.00113695	0.0341515	Down
UTP3	1356.62	637.167	1.09027	0.00132752	0.0380631	Down
VEGFA	667.191	17.0658	5.28892	0.000711806	0.0249007	Down
VRK3	269.065	102.364	1.39424	5.70289e-05	0.00418142	Down
ZBTB11	766.361	360.801	1.08682	0.00117681	0.0350048	Down
ZFP37	139.985	44.2727	1.66078	0.000818292	0.0270543	Down
ZFP42	1101.54	227.655	2.2746	2.9079e-06	0.000477521	Down
ZFYVE9	252.426	102.9	1.29462	0.00119785	0.0354101	Down
ZMYND19	31.8052	1.29213	4.62144	0.00142136	0.039834	Down
ZSCAN4	6255.14	1836.53	1.76806	0.00159415	0.0426898	Down
ABCB6	35.5882	338.366	-3.24911	6.27106e-06	0.00088373	Up
ABHD12	334.401	1353.52	-2.01706	0.00101634	0.031407	Up
ABHD14A	79.1564	242.52	-1.61533	0.000173654	0.00922596	Up
ABHD14B	25.0268	251.246	-3.32755	1.43141e-07	4.89459e-05	Up
ACAA1	376.574	1324.94	-1.81492	2.15849e-05	0.00214033	Up
ACAD9	187.192	510.92	-1.44858	0.000150283	0.00848329	Up
ACAT2	1659.52	4928.17	-1.57029	3.84293e-05	0.00307675	Up
ACOT7	39.6247	322.973	-3.02694	6.54734e-07	0.000153054	Up
ACTA2	429.003	10463.3	-4.6082	4.06183e-11	7.33714e-08	Up
ADAMTS8	0.748963	55.3792	-6.20831	2.96655e-05	0.00255175	Up
ADAT2	128.933	785.239	-2.60651	4.48988e-07	0.000114377	Up
ADK	224.85	523.563	-1.2194	2.03034e-05	0.00206886	Up
ADPRHL2	75.0785	414.646	-2.46541	0.000806946	0.0269926	Up
ADSL	172.819	562.702	-1.70311	0.000515114	0.0202177	Up
AEN	220.543	727.587	-1.72206	0.000613485	0.0226158	Up
AFAP1	11.0404	164.498	-3.8972	0.00153152	0.0417663	Up
AKR1E2	4.38519	110.278	-4.65236	2.08236e-11	5.10884e-08	Up
ALDH3A2	89.9648	398.908	-2.14862	2.74812e-07	8.15003e-05	Up
ALG2	177.061	441.76	-1.31902	0.000576442	0.021652	Up
ALKBH6	45.7266	178.667	-1.96616	2.2757e-05	0.00219505	Up
AMDHD2	7.46743	275.344	-5.20448	1.45335e-07	4.89459e-05	Up
ANKRD29	52.5649	338.41	-2.6866	2.31402e-11	5.10884e-08	Up
ANP32E	590.099	2025.07	-1.77894	0.000696323	0.024537	Up
ANTXR1	69.9064	699.061	-3.32192	0.000358836	0.015484	Up
AP3S2	405.266	1147.95	-1.50212	6.17281e-06	0.000882401	Up
AP5B1	0.960367	28.5394	-4.89323	0.00197776	0.0496815	Up
APBA3	21.8177	151.729	-2.79793	3.12437e-07	8.86874e-05	Up
APBB3	193.843	550.441	-1.5057	0.000594553	0.0219996	Up
APEX1	1266.36	2740.03	-1.11351	0.000220118	0.0110728	Up
APOPT1	90.2028	446.303	-2.30678	0.000163706	0.00886331	Up
APRT	93.4706	455.987	-2.28641	0.000543375	0.0208837	Up
ARFIP2	60.6404	308.071	-2.34491	0.000173633	0.00922596	Up
ARHGEF18	93.0221	243.722	-1.38959	0.000373915	0.0158436	Up
ARHGEF19	11.7679	48.6268	-2.04689	0.000461177	0.0185498	Up
ARL14	0.134764	16.7398	-6.9567	0.00184974	0.0476709	Up
ARL6IP5	88.0235	784.379	-3.15559	1.65735e-09	1.5955e-06	Up
ARRB2	2.74148	28.382	-3.37195	0.000982274	0.0307106	Up
ASB1	40.5843	168.281	-2.05188	9.52152e-05	0.00602524	Up
ASRGL1	254.284	804.477	-1.66161	4.70344e-07	0.000116822	Up
ATF3	189.712	649.323	-1.77512	5.30552e-05	0.00396318	Up
ATG16L2	7.56491	56.2654	-2.89485	0.000124142	0.00738533	Up
ATG4D	29.982	103.715	-1.79045	4.8654e-05	0.0036899	Up
ATP13A2	90.4777	545.958	-2.59316	0.00115652	0.0345566	Up
ATP5D	360.437	1665.32	-2.20798	5.49802e-08	2.48286e-05	Up
ATP5G1	1169.71	3827.78	-1.71036	0.0012022	0.0354101	Up
ATPIF1	940.672	2696.86	-1.51952	2.7965e-06	0.000463053	Up
AXIN1	29.0761	209.561	-2.84946	0.000313942	0.0141452	Up
B4GAT1	71.3806	191.337	-1.42251	0.00191529	0.0486063	Up
BACE1	37.2458	236.418	-2.66619	1.12927e-06	0.000219987	Up
BAG5	65.8166	236.901	-1.84776	4.1617e-07	0.000110343	Up
BCL2L11	81.7819	299.057	-1.87057	7.96325e-05	0.00536372	Up
BEST2	19.5698	470.409	-4.58721	5.41685e-05	0.00403119	Up
BEX1	83.786	254.4	-1.60232	0.000867277	0.0280664	Up
BICDL2	2.60215	39.5826	-3.92709	0.000765139	0.0261225	Up
BLOC1S3	0.356511	26.3861	-6.20969	0.000152	0.00851002	Up
BLVRB	261.049	2422.05	-3.21384	3.79192e-09	3.01382e-06	Up
BOLA1	196.226	821.615	-2.06595	6.16315e-09	4.53563e-06	Up
BOLA3	601.937	1462.43	-1.28068	0.00159266	0.0426898	Up
BTBD6	38.8215	221.25	-2.51075	0.000502913	0.0198666	Up
C12H17orf62	27.7398	138.632	-2.32123	7.13409e-05	0.00498813	Up
C12H17orf75	147.952	346.871	-1.22927	0.00190759	0.0485947	Up
C13H21orf2	8.78054	169.255	-4.26875	1.75858e-11	4.99185e-08	Up
C13H3orf14	46.0749	174.482	-1.92102	0.000261949	0.0125723	Up
C13H3orf33	7.04956	68.8271	-3.28737	0.00104766	0.0321747	Up
C18H7orf49	21.2464	109.575	-2.36663	3.37199e-05	0.00279173	Up
C1H6orf203	861.973	2686.82	-1.64018	1.31861e-08	7.93961e-06	Up
C2H11orf68	16.4933	117.993	-2.83875	9.309e-05	0.00594758	Up
C2H11orf84	96.041	401.219	-2.06267	0.000145139	0.00836974	Up
C2H11orf98	1372.45	2889.31	-1.07397	0.00148154	0.0410574	Up
C3H16orf59	18.9281	136.807	-2.85353	6.48151e-05	0.00464937	Up
C3H2orf68	72.631	273.663	-1.91374	3.05115e-05	0.00259087	Up
C3H2orf81	0.157292	14.1269	-6.48886	0.000674507	0.0239758	Up
C3H7orf50	36.0708	177.952	-2.30259	8.49909e-07	0.000177765	Up
C5H12orf29	461.533	956.948	-1.05201	0.00188556	0.0484057	Up
CACNA1H	2.64858	89.0723	-5.07168	0.00062732	0.0229979	Up
CALR3	19.2667	75.202	-1.96466	0.000372042	0.0158297	Up
CAMK2N2	1.41737	43.7914	-4.94936	0.000547061	0.0209041	Up
CAPZA2	720.096	2372.8	-1.72033	7.6993e-05	0.00527535	Up
CBX4	7.24924	131.241	-4.17824	0.000423119	0.0172991	Up
CCDC134	182.002	674.85	-1.89061	4.63709e-07	0.000116632	Up
CCDC138	35.4616	137.965	-1.95997	0.0010845	0.0330506	Up
CCDC58	812.866	2674.61	-1.71824	1.94118e-05	0.00198821	Up
CCDC59	1944.65	3967.65	-1.02877	0.000564613	0.0212882	Up
CCNE2	83.8202	191.209	-1.18978	0.00191539	0.0486063	Up
CD151	36.7179	1212.85	-5.04577	7.93857e-07	0.000170578	Up
CD320	195.694	425.904	-1.12192	2.13135e-05	0.00213888	Up
CDIP1	144.279	300.987	-1.06084	0.000894879	0.0289126	Up
CDK10	17.3771	144.453	-3.05534	2.30941e-05	0.00220062	Up
CDKN2D	105.061	251.941	-1.26187	0.000214909	0.0108382	Up
CDPF1	157.696	436.51	-1.46887	0.000660937	0.0237175	Up
CDT1	4.47451	49.5465	-3.46898	0.00117919	0.0350232	Up
CELF4	6.90838	69.2549	-3.3255	9.00066e-05	0.0058066	Up
CEND1	0.301147	44.2689	-7.19968	1.56008e-07	5.16647e-05	Up
CENPX	52.8433	260.508	-2.30154	3.49211e-07	9.63726e-05	Up
CEP72	0.733254	24.2442	-5.04718	0.000168382	0.00906705	Up
CFAP36	202.651	530.738	-1.389	8.38969e-05	0.00555677	Up
CFLAR	178.78	579.688	-1.69709	4.61805e-05	0.00354288	Up
CGRRF1	367.742	752.734	-1.03345	0.000648188	0.0234599	Up
CHID1	159.285	821.77	-2.36713	6.65756e-08	2.87578e-05	Up
CHMP1A	42.3633	305.161	-2.84868	1.29467e-05	0.0014534	Up
CHMP2A	523.462	1461.39	-1.48119	0.00149093	0.041248	Up
CHMP6	2.28534	172.235	-6.23583	4.19644e-07	0.000110343	Up
CHRDL1	28.8015	1816.16	-5.9786	0.000226249	0.0112671	Up
CIRBP	239.834	533.329	-1.15299	1.62875e-05	0.0017868	Up
CKB	4023.49	20262.5	-2.3323	7.17706e-05	0.00498813	Up
CLCN7	36.7919	127.614	-1.79432	0.00117463	0.0349925	Up
CMSS1	460.961	1175.75	-1.35087	0.000946808	0.0300528	Up
CNIH2	43.4775	124.025	-1.51229	0.000272829	0.0127256	Up
CNNM1	18.5985	135.588	-2.86598	3.09352e-07	8.86874e-05	Up
CNPY1	2.01275	54.5935	-4.76149	7.808e-05	0.00533144	Up
COMMD1	165.918	421.071	-1.34359	0.0015021	0.0413391	Up
COMMD6	314.449	978.531	-1.63779	3.17113e-05	0.00266993	Up
COPS5	140.886	882.814	-2.64758	9.48509e-09	6.28229e-06	Up
CPOX	121.7	469.203	-1.94688	0.000259538	0.0124867	Up
CRYAB	81.0008	542.975	-2.74488	0.00042685	0.0174158	Up
CTSD	85.7041	5628.56	-6.03726	7.20583e-09	4.93724e-06	Up
CTTN	376.091	1061.83	-1.49739	0.000863272	0.0280281	Up
CUTC	282.071	992.813	-1.81546	2.5642e-06	0.000431785	Up
CXCL2	0.488442	24.8598	-5.66948	0.000212686	0.0107808	Up
CXHXorf38	47.1766	170.104	-1.85028	0.000221553	0.0111168	Up
CYR61	212.523	1264.2	-2.57253	0.000635907	0.0230574	Up
DALRD3	63.0899	313.086	-2.31108	4.83927e-08	2.26183e-05	Up
DBNDD2	31.7393	190.143	-2.58274	7.31033e-05	0.00506119	Up
DCP1B	10.9914	75.6227	-2.78244	0.000516738	0.0202177	Up
DDRGK1	20.3409	280.059	-3.78328	5.85139e-10	7.75114e-07	Up
DDX49	364.672	804.344	-1.14121	0.0012333	0.0358795	Up
DECR2	0.722513	125.583	-7.4414	5.25907e-09	4.01914e-06	Up
DEF8	53.8094	218.933	-2.02456	0.000156226	0.00864683	Up
DGCR6L	148.272	635.728	-2.10017	0.000108991	0.00668409	Up
DGKA	54.635	383.688	-2.81204	0.000852432	0.0278583	Up
DHCR7	14.7873	133.68	-3.17635	0.000152041	0.00851002	Up
DHRS4	12.8308	150.669	-3.55371	0.000185088	0.00962747	Up
DISP1	187.546	446.325	-1.25085	2.26294e-05	0.00219339	Up
DLD	3158.21	7490.09	-1.24588	0.000264431	0.0125925	Up
DNAJB5	47.5808	199.973	-2.07135	1.5967e-06	0.000283271	Up
DNPEP	442.884	1294.19	-1.54705	0.000171829	0.00920281	Up
DOLPP1	59.7668	183.161	-1.61569	0.000201692	0.0103023	Up
DPCD	203.244	962.618	-2.24375	3.64066e-06	0.00057872	Up
DPP7	66.116	336.584	-2.34789	0.000317518	0.014246	Up
EAPP	763.993	1676.59	-1.1339	0.000568341	0.0213881	Up
ECE2	74.0781	307.566	-2.05378	0.000154728	0.00858785	Up
ECI1	28.8466	220.088	-2.9316	0.000353407	0.0153996	Up
ECM1	420.426	1393.77	-1.72907	2.05084e-05	0.00207909	Up
EDEM3	201.598	668.582	-1.72962	5.77492e-06	0.000837575	Up
EEF1AKMT3	476.069	1419.66	-1.5763	8.6502e-06	0.0011234	Up
EEF1D	211.578	1316.47	-2.63741	4.0797e-08	2.02659e-05	Up
EEF1G	1559.65	9635.33	-2.62711	3.55497e-08	1.90912e-05	Up
EIF2S1	4121.96	9110.2	-1.14415	0.000777552	0.0264554	Up
ELAC1	95.1708	444.572	-2.22383	7.92161e-07	0.000170578	Up
ELP6	253.63	685.21	-1.43382	0.000410254	0.0168852	Up
EMC3	847.097	1847.73	-1.12516	8.13719e-05	0.00540756	Up
EMC7	968.101	2420.48	-1.32206	2.09798e-07	6.64103e-05	Up
EMC8	298.61	1083.15	-1.8589	0.000268719	0.0125984	Up
EMP1	169.264	1111.07	-2.7146	3.79476e-05	0.0030527	Up
ENO1	1484.5	4752.05	-1.67858	0.00154244	0.0417663	Up
ENTPD3	8.00886	182.749	-4.51212	6.60685e-09	4.68851e-06	Up
ERCC5	89.1421	298.379	-1.74297	6.18187e-07	0.000147993	Up
ERGIC1	53.7488	514.832	-3.2598	6.53557e-05	0.00467129	Up
EVA1B	2.09358	64.7964	-4.95187	0.000324418	0.0144858	Up
EXOC7	53.8594	341.513	-2.66467	4.89458e-08	2.26183e-05	Up
EXOSC2	103.006	388.739	-1.91607	4.78177e-06	0.00073654	Up
EXOSC4	123.199	490.335	-1.99278	1.63662e-05	0.0017868	Up
FAAP20	1.48981	92.0552	-5.9493	9.83918e-06	0.00122959	Up
FAH	1.30254	53.4665	-5.35923	0.000950665	0.0301271	Up
FAM160B2	26.9427	174.848	-2.69814	2.88223e-05	0.00253307	Up
FAM173A	25.7857	269.184	-3.38395	1.6547e-08	9.39396e-06	Up
FAM174A	19.3262	122.327	-2.66211	0.00022261	0.0111417	Up
FAM20B	161.128	358.738	-1.15472	0.000898078	0.0289688	Up
FAM237A	37.8803	212.16	-2.48564	1.42669e-13	1.41741e-09	Up
FARSA	218.437	462.301	-1.08162	2.65088e-06	0.00044263	Up
FAS	121.298	419.554	-1.79029	0.000741405	0.0255759	Up
FASTK	25.7131	189.463	-2.88134	0.00011467	0.00691757	Up
FASTKD3	296.935	834.213	-1.49027	5.25577e-06	0.000767883	Up
FBLN2	184.734	556.457	-1.59082	0.000188139	0.00971784	Up
FBXO36	4.3231	42.2529	-3.28891	0.000201176	0.0103023	Up
FBXW5	3.39143	167.975	-5.63021	0.000526348	0.020387	Up
FDX1	68.5604	399.039	-2.54108	1.27155e-05	0.00145164	Up
FHL3	65.4334	306.999	-2.23013	0.00146716	0.0409284	Up
FIS1	304.886	676.388	-1.14958	0.000267485	0.0125946	Up
FLCN	42.1351	224.39	-2.41291	0.000290716	0.0134338	Up
FMOD	91.269	8934.77	-6.61316	0.000634375	0.0230574	Up
FN3KRP	4.05982	105.305	-4.69702	1.74393e-05	0.001863	Up
FPGT	29.084	131.421	-2.1759	0.000268834	0.0125984	Up
FUBP3	190.199	464.615	-1.28853	5.83691e-05	0.00426395	Up
FUZ	1.86411	30.4643	-4.03056	0.00194058	0.0490576	Up
GAK	11.4323	158.606	-3.79426	0.000176945	0.00931132	Up
GALE	81.7507	299.956	-1.87545	0.000753689	0.0258649	Up
GALK1	62.1448	206.102	-1.72965	0.000264075	0.0125925	Up
GAR1	458.507	960.627	-1.06703	2.11312e-05	0.00213136	Up
GATA3	237.532	915.836	-1.94697	0.000976083	0.0307106	Up
GDF6	12.4944	285.807	-4.51569	2.20564e-06	0.000377811	Up
GDPGP1	127.241	326.205	-1.35822	0.000403992	0.0167585	Up
GEMIN2	198.911	1121.6	-2.49536	2.72056e-13	1.80192e-09	Up
GFER	47.9711	250.527	-2.38473	0.000749816	0.0257766	Up
GFOD2	64.6579	220.186	-1.76782	0.000128822	0.0075955	Up
GLRX2	162.882	578.267	-1.82791	9.19765e-05	0.0058954	Up
GLYATL2	0.0889612	11.4107	-7.00299	0.000467552	0.0186178	Up
GNB1L	30.6233	301.313	-3.29856	8.06542e-05	0.00538537	Up
GNL1	50.774	171.298	-1.75435	0.000252999	0.0122612	Up
GNL3	345.334	1231.55	-1.83442	7.20957e-08	2.98446e-05	Up
GNL3L	720.81	1712	-1.24799	0.000339699	0.0149996	Up
GNPTG	455.303	1120.55	-1.29931	1.82279e-05	0.00189645	Up
GPR153	0.164307	43.9691	-8.06395	4.22045e-07	0.000110343	Up
GPX4	352.091	1094.09	-1.63571	0.000337683	0.0149438	Up
GTF2H4	75.2834	214.323	-1.50938	0.000364106	0.0156259	Up
GTF3A	281.185	601.978	-1.09819	2.89024e-05	0.00253307	Up
HBQ1	0.497788	32.2304	-6.01675	0.000233066	0.0115679	Up
HEMGN	0.494288	22.3527	-5.49896	0.000110585	0.00676097	Up
HERPUD1	362.386	1027.37	-1.50336	0.00144693	0.0404366	Up
HES3	0.26158	36.3371	-7.11804	3.81973e-06	0.000599371	Up
HIPK4	0.455214	40.7529	-6.48421	4.58004e-05	0.00352734	Up
HK3	5.54139	52.8863	-3.25457	0.000453336	0.0182714	Up
HMBS	136.026	754.512	-2.47166	0.000577991	0.0216692	Up
HMOX1	265.476	3017.51	-3.50671	0.00015975	0.00872042	Up
HOPX	3.74467	34.2569	-3.19348	0.000693957	0.024537	Up
HSF2	121.584	428.54	-1.81748	1.32982e-06	0.000242417	Up
HSPA13	192.395	670.348	-1.80084	5.08487e-06	0.000754003	Up
HSPB2	78.9077	468.994	-2.57133	0.000790371	0.0266633	Up
HSPD1	5531.51	13045	-1.23776	0.000981779	0.0307106	Up
HYAL3	83.2922	262.157	-1.65418	1.22296e-06	0.000227105	Up
IBA57	16.4996	121.81	-2.88414	0.00177382	0.0462543	Up
IER2	116.954	584.638	-2.3216	0.00109204	0.0331742	Up
IFITM3	31.2523	346.045	-3.46893	0.000266452	0.0125925	Up
IKBIP	100.586	535.406	-2.4122	6.30732e-05	0.00455733	Up
IL10RB	20.6857	144.143	-2.8008	6.84702e-08	2.89469e-05	Up
IL17RC	3.4122	99.5382	-4.86647	8.62683e-05	0.00569486	Up
IL20	0.227858	73.1357	-8.3263	5.17576e-06	0.000761795	Up
IL6R	256.18	819.591	-1.67775	1.08864e-05	0.00130505	Up
ILK	290.489	755.711	-1.37935	1.17739e-06	0.00022495	Up
ILVBL	183.473	505.363	-1.46176	4.00245e-05	0.0031559	Up
IMPACT	289.71	704.848	-1.2827	2.80202e-05	0.00253307	Up
ING2	34.4834	117.002	-1.76255	9.81041e-06	0.00122959	Up
IRF2BPL	123.742	393.249	-1.66811	0.00106096	0.032533	Up
ISG20L2	203.638	658.37	-1.69289	1.59011e-05	0.00176511	Up
ISOC2	19.5158	138.321	-2.82531	1.27084e-05	0.00145164	Up
ITGAL	7.3294	44.023	-2.58649	0.000734055	0.0253664	Up
JAGN1	606.608	1428.29	-1.23545	1.56171e-06	0.00027956	Up
JMJD8	36.1998	159.656	-2.14092	0.00190178	0.0485672	Up
JUN	27.9944	421.971	-3.91393	8.86759e-07	0.000183541	Up
KCNK1	0.657976	61.9181	-6.55618	3.20094e-05	0.00268366	Up
KCTD18	8.04418	76.0422	-3.24078	1.01977e-06	0.000205842	Up
KDELR3	59.3718	340.636	-2.52038	7.74619e-06	0.00103998	Up
KEAP1	100.009	281.617	-1.4936	0.000300416	0.0137334	Up
KHK	5.87411	53.4801	-3.18656	0.000181442	0.00948752	Up
KIAA0513	89.3572	219.421	-1.29605	0.000142665	0.00828877	Up
KLF15	0.617162	22.9305	-5.21547	0.00135298	0.0384052	Up
KLF6	191.458	688.21	-1.84582	0.000465915	0.0186178	Up
KRCC1	17.2685	136.017	-2.97758	6.91242e-06	0.000960488	Up
KRI1	69.029	141.637	-1.03692	0.000990088	0.0307392	Up
KRT80	3.83584	54.0903	-3.81776	0.00046283	0.0185679	Up
KXD1	575.351	2113.22	-1.87693	8.86566e-10	1.03624e-06	Up
LASP1	942.745	3678.8	-1.96429	3.61716e-05	0.00293359	Up
LDAH	143.353	427.756	-1.57722	1.55742e-05	0.00173854	Up
LEMD2	21.6637	160.536	-2.88955	1.35461e-06	0.000244693	Up
LIMS1	266.597	558.19	-1.06609	0.000857889	0.0279447	Up
LIPT1	39.9483	434.689	-3.44378	1.38687e-10	2.11978e-07	Up
LOC100154423	24.0396	91.3607	-1.92616	0.000632476	0.0230574	Up
LOC100156381	221.838	626.185	-1.49709	3.67701e-08	1.92269e-05	Up
LOC100512448	669.765	1640.63	-1.29252	0.001021	0.0314531	Up
LOC100512926	239.179	688.569	-1.52551	0.00136114	0.0385268	Up
LOC100514032	0.141807	9.1593	-6.01324	0.00138707	0.0390938	Up
LOC100515119	0.960835	40.7396	-5.406	0.00070246	0.0246606	Up
LOC100515643	114.336	349.31	-1.61123	0.000145102	0.00836974	Up
LOC100518982	2.62815	33.6855	-3.68001	9.77117e-05	0.00616359	Up
LOC100519871	116.896	574.557	-2.29722	0.000317613	0.014246	Up
LOC100520248	60.7785	251.285	-2.04769	1.80909e-05	0.00189645	Up
LOC100521229	2.35776	91.7596	-5.28237	0.000288598	0.013367	Up
LOC100524613	599.449	3648.33	-2.60553	3.73798e-11	7.33714e-08	Up
LOC100525140	1.57804	73.631	-5.54411	0.000564231	0.0212882	Up
LOC100525869	599.479	2255.49	-1.91166	0.000373962	0.0158436	Up
LOC100621287	1338.11	2939.03	-1.13514	1.13378e-07	4.33236e-05	Up
LOC100625049	920.174	2864.83	-1.63847	1.002e-05	0.00124435	Up
LOC100625251	4.23038	39.2361	-3.21332	0.000327279	0.0145808	Up
LOC100737585	376.134	762.779	-1.02002	0.000987623	0.0307106	Up
LOC100738684	127.711	798.735	-2.64484	2.87821e-05	0.00253307	Up
LOC100739719	473.897	1749.73	-1.88449	0.000134832	0.00789041	Up
LOC102160997	6.96304	71.2374	-3.35484	0.000546233	0.0209041	Up
LOC102164431	71.3929	522.385	-2.87126	0.000149266	0.00845682	Up
LOC102164731	78.6897	224.488	-1.51239	0.000313918	0.0141452	Up
LOC102165762	7.52073	51.8593	-2.78566	0.00039006	0.0163512	Up
LOC102165849	11.6876	86.5242	-2.88812	0.000264282	0.0125925	Up
LOC106504315	2.25778	27.4394	-3.60327	0.00156016	0.0421202	Up
LOC106504776	39.4596	113.107	-1.51924	0.00141692	0.0397658	Up
LOC110255927	3.5829	69.524	-4.27831	0.00188364	0.0484057	Up
LOC110257686	6.0871	200.26	-5.03997	4.42707e-05	0.00343617	Up
LOC110257687	12.8306	148.279	-3.53064	0.00193894	0.0490576	Up
LOC110258799	4.64194	57.0258	-3.61882	0.00152577	0.041759	Up
LOC110259864	34.7804	324.35	-3.2212	0.000303525	0.0138081	Up
LOC110261048	6.31831	96.8423	-3.93803	6.96201e-05	0.0049055	Up
LOC110261325	30.9648	124.626	-2.0089	3.45559e-05	0.00284907	Up
LPAR6	49.3126	156.735	-1.6683	0.000451811	0.0182469	Up
LRP10	140.182	654.918	-2.22401	0.00127248	0.0368574	Up
LRPAP1	334.633	2373.53	-2.82638	1.11032e-05	0.00131322	Up
LRRC14	59.632	213.641	-1.84103	0.000360021	0.015484	Up
LRRC19	0.249636	26.4342	-6.72643	8.2096e-06	0.0010803	Up
LRRC45	1.11345	151.858	-7.09154	0.000149388	0.00845682	Up
LRRC51	1.16493	16.5351	-3.82722	0.00166425	0.0442685	Up
LRRC58	20.6467	493.308	-4.5785	1.16404e-07	4.34674e-05	Up
MAP1LC3A	58.652	254.318	-2.11638	0.000929586	0.0297917	Up
MAP2K3	74.2458	299.227	-2.01086	1.08639e-05	0.00130505	Up
MAPK12	2.62745	205.611	-6.29011	1.24147e-06	0.000228407	Up
MBLAC1	129.88	422.567	-1.702	0.000118142	0.00707073	Up
MCRIP2	28.2551	254.632	-3.17183	2.95791e-05	0.00255175	Up
MDH1	742.113	2238.99	-1.59314	1.86329e-05	0.00192831	Up
MEI1	218.882	712.059	-1.70184	3.15866e-08	1.74341e-05	Up
METAP1D	12.6579	76.1543	-2.58888	0.00106868	0.0326688	Up
METRN	45.4009	265.405	-2.5474	1.82296e-05	0.00189645	Up
METTL26	33.9123	209.897	-2.6298	8.82976e-06	0.00113927	Up
MFSD5	52.2978	327.48	-2.64658	6.28021e-07	0.000148557	Up
MKI67	17.3505	164.52	-3.24521	1.18572e-05	0.0013859	Up
MMAB	140.747	392.117	-1.47818	0.00167538	0.0443057	Up
MRPL14	335.958	1021.1	-1.60377	2.80642e-05	0.00253307	Up
MRPL36	122.172	536.199	-2.13385	1.71516e-05	0.00185218	Up
MRPL40	109.031	669.973	-2.61936	3.85562e-05	0.00307675	Up
MRPL45	741.02	1765.82	-1.25275	3.70519e-05	0.00299277	Up
MRPL47	987.108	2105.73	-1.09304	2.99693e-05	0.00256115	Up
MRPL55	357.009	1274.57	-1.83598	0.000135015	0.00789041	Up
MRPS26	184.717	805.941	-2.12536	0.000387807	0.0162912	Up
MSANTD4	468	1345.6	-1.52367	2.17157e-05	0.00214033	Up
MTFP1	2.2259	496.623	-7.80162	1.68624e-09	1.5955e-06	Up
MTHFR	36.4852	166.273	-2.18817	0.000126929	0.00750619	Up
MTX1	178.608	457.085	-1.35567	0.000248318	0.0120637	Up
MVD	6.07777	344.02	-5.8228	4.54245e-14	9.02586e-10	Up
MYL9	21.9559	1770.5	-6.3334	1.15492e-06	0.000222799	Up
MYRIP	2.7286	24.6023	-3.17256	0.00111984	0.033765	Up
NADSYN1	0.511778	53.5078	-6.70809	2.78777e-05	0.00253307	Up
NARF	90.7879	222.752	-1.29487	0.00108332	0.0330506	Up
NAT8L	1.01725	43.3356	-5.41281	0.000337468	0.0149438	Up
NBEAL2	3.26606	176.501	-5.75598	3.45911e-06	0.000558801	Up
NCDN	29.396	93.0082	-1.66174	0.0017264	0.0453152	Up
NDRG1	143.494	530.067	-1.88519	0.00143884	0.0402672	Up
NDUFA9	1575.02	4345.17	-1.46404	1.29322e-05	0.0014534	Up
NDUFAB1	888.191	3785.27	-2.09146	0.000102782	0.00638212	Up
NDUFAF3	45.5709	238.646	-2.38868	2.73508e-05	0.00251602	Up
NDUFAF6	71.9288	250.799	-1.80189	3.60239e-05	0.00293359	Up
NDUFB10	338.652	1251.3	-1.88556	1.03418e-05	0.00126847	Up
NDUFS7	218.21	2242.61	-3.36139	1.33705e-09	1.39827e-06	Up
NDUFS8	160.732	675.664	-2.07165	0.00153939	0.0417663	Up
NDUFV1	847.978	2438.52	-1.52391	0.000982298	0.0307106	Up
NDUFV3	86.1702	446.899	-2.37469	0.000448366	0.0181753	Up
NECAP2	375.816	904.372	-1.26689	1.20549e-06	0.000225973	Up
NEU1	352.239	1072.4	-1.60622	0.00077249	0.0263283	Up
NFATC2IP	42.6384	162.843	-1.93326	1.1813e-07	4.34674e-05	Up
NMT2	485.899	1080.25	-1.15264	0.00096339	0.0304333	Up
NOP53	48.7775	479.255	-3.29651	0.00166951	0.0442901	Up
NPHS1	32.1811	119.666	-1.89472	0.00153467	0.0417663	Up
NTMT1	42.1941	174.746	-2.05015	0.000698457	0.0245634	Up
NTPCR	100.914	214.795	-1.08984	0.000801424	0.0268538	Up
NUBP2	17.4495	131.503	-2.91384	4.95382e-05	0.00374268	Up
NUDCD3	67.9588	334.213	-2.29804	0.000584866	0.0217627	Up
NUDT1	53.8015	334.834	-2.63773	4.91998e-06	0.000740606	Up
NUDT18	14.3136	102.748	-2.84366	7.17969e-05	0.00498813	Up
NUDT7	124.225	401.84	-1.69367	0.00149998	0.0413378	Up
OAZ3	1.34576	23.4323	-4.12201	0.000602362	0.0222471	Up
OCIAD2	26.4017	226.8	-3.10272	1.09028e-05	0.00130505	Up
OLA1	764.026	1826.03	-1.25702	0.000239366	0.0117437	Up
OSGIN1	1.09745	59.9482	-5.77149	0.000922325	0.0297028	Up
PAOX	1.29456	43.9442	-5.08514	0.0008183	0.0270543	Up
PARP16	21.4045	93.0288	-2.11976	0.00173755	0.0455477	Up
PBX4	2.26627	30.3444	-3.74304	0.000849162	0.027843	Up
PCLAF	161.041	456.013	-1.50164	0.00160933	0.0429832	Up
PCNT	47.8514	199.159	-2.05729	2.40886e-07	7.47877e-05	Up
PCSK7	41.3004	223.244	-2.4344	2.18058e-06	0.000376766	Up
PDCD5	911.099	2011.09	-1.1423	0.000421556	0.0172707	Up
PDE9A	0.46536	23.447	-5.65492	0.000800002	0.0268514	Up
PDF	87.8464	301.772	-1.78041	1.14889e-05	0.0013508	Up
PDHB	794.927	2432.21	-1.61337	1.7327e-05	0.00186101	Up
PDZD9	232.115	1195.54	-2.36475	1.21683e-08	7.55574e-06	Up
PEG3	62.603	208.793	-1.73777	5.5009e-05	0.00407846	Up
PELP1	64.5397	164.665	-1.35128	0.00176576	0.0461047	Up
PEX11A	10.5342	105.09	-3.31847	4.87856e-06	0.000740606	Up
PFAS	28.9201	180.006	-2.6379	0.000562836	0.0212882	Up
PGS1	40.65	226.587	-2.47874	4.49618e-05	0.00347623	Up
PHKG1	0.69494	22.8119	-5.03675	0.000537185	0.0207259	Up
PHLDA3	11.8176	945.999	-6.32283	9.91058e-05	0.00621209	Up
PIGL	5.38235	40.6934	-2.91849	0.00111392	0.0336376	Up
PIK3CB	316.345	1101.83	-1.80033	4.04597e-05	0.0031776	Up
PITPNM1	5.80629	109.895	-4.24236	0.000359268	0.015484	Up
PLEKHF1	20.1792	154.182	-2.93369	0.000409086	0.0168852	Up
PLSCR1	29.0043	121.636	-2.06823	0.000725743	0.0252548	Up
PMPCA	87.4868	482.374	-2.46301	0.00110091	0.0333462	Up
PMVK	123.929	619.873	-2.32246	7.86836e-10	9.77152e-07	Up
POLD4	63.2215	360.331	-2.51083	3.12067e-07	8.86874e-05	Up
POLL	9.89341	55.8527	-2.49709	0.000234769	0.0115679	Up
POLR2G	504.166	1217.64	-1.27212	0.000862318	0.0280281	Up
POLR3F	118.82	773.834	-2.70324	2.86308e-09	2.37039e-06	Up
PPIB	1445.81	3638.15	-1.33133	0.000961123	0.0304101	Up
PPIC	36.3153	532.715	-3.87471	1.45885e-08	8.52567e-06	Up
PPIF	785.338	1973.83	-1.32962	3.83091e-06	0.000599371	Up
PPM1F	12.0292	422.624	-5.13476	7.0269e-11	1.16354e-07	Up
PPP1R26	1.51148	57.9139	-5.25988	0.000664183	0.0237175	Up
PPP6R2	23.2732	197.604	-3.08587	0.000121125	0.00722751	Up
PRDM12	2.00521	30.8802	-3.94486	0.000171443	0.00920281	Up
PRIM1	492.091	1007.15	-1.03329	7.90659e-05	0.00536191	Up
PRKX	226.363	514.092	-1.18339	0.00170519	0.0449961	Up
PRPF31	84.9319	237.28	-1.48221	0.000410446	0.0168852	Up
PRRG2	6.15003	37.1902	-2.59626	0.00152088	0.0416826	Up
PRSS16	0.153052	20.9591	-7.09741	1.69151e-06	0.000297437	Up
PSKH1	91.3009	269.378	-1.56093	0.00130454	0.0375839	Up
PSMA6	1726.21	5040.03	-1.54583	7.50359e-07	0.000167524	Up
PSMC5	947.996	2591.06	-1.45059	1.08371e-06	0.000213202	Up
PSME1	112.713	486.419	-2.10955	5.17084e-12	1.9561e-08	Up
PSMG2	249.7	1572.83	-2.6551	5.9067e-12	1.9561e-08	Up
PTK6	65.8079	179.548	-1.44804	8.92011e-05	0.00577337	Up
PURG	15.054	103.626	-2.78316	1.02807e-08	6.5896e-06	Up
PUS1	48.7398	209.785	-2.10574	2.3487e-05	0.00222232	Up
PUS7L	198.635	801.417	-2.01243	1.80998e-07	5.89578e-05	Up
PYCR1	50.6797	685.888	-3.75849	2.41162e-06	0.000409563	Up
PYROXD1	390.683	899.804	-1.20361	0.000322726	0.0144427	Up
RAB13	37.4222	325.431	-3.12039	1.01469e-05	0.00125229	Up
RAB7B	19.6571	185.02	-3.23455	0.0002592	0.0124867	Up
RABAC1	239.81	784.832	-1.71049	8.82055e-05	0.00574637	Up
RABIF	183.396	542.497	-1.56465	0.000618345	0.0227107	Up
RASD1	0.702268	34.08	-5.60076	0.000397568	0.0165265	Up
RASSF1	199.436	680.965	-1.77165	3.49621e-05	0.00287065	Up
RBAK	47.7336	125.638	-1.3962	0.00118547	0.0351571	Up
RBBP9	34.7126	265.49	-2.93513	2.58633e-07	7.90621e-05	Up
RCAN2	1.09468	188.076	-7.42466	1.23575e-07	4.3847e-05	Up
RELL1	50.4706	159.752	-1.66232	0.00166699	0.0442823	Up
RELT	3.25532	64.7266	-4.31349	7.71639e-08	3.12907e-05	Up
RFC5	267.321	575.035	-1.10508	5.11346e-05	0.00383413	Up
RIPK2	76.1099	232.933	-1.61376	8.91076e-05	0.00577337	Up
RND3	120.598	395.263	-1.7126	0.000815101	0.0270543	Up
RNF126	97.0797	282.412	-1.54056	0.0015354	0.0417663	Up
RNF167	101.301	322.195	-1.66928	0.000146054	0.00836974	Up
RPP38	419.036	1041.24	-1.31316	0.00109356	0.0331742	Up
RPS12	1117.78	4320.51	-1.95056	0.00093779	0.0299099	Up
RRP1	56.7077	307.162	-2.43738	0.00083069	0.0273728	Up
RRP9	221.016	577.796	-1.38641	0.000522532	0.0202787	Up
RTCB	764.944	2404.01	-1.65202	5.22342e-07	0.000128135	Up
S100A6	32.0727	1497.36	-5.54493	0.000724421	0.025253	Up
S1PR3	2.32328	58.2393	-4.64776	0.00123183	0.0358795	Up
SBF1	12.1544	779.55	-6.00309	0.000651283	0.0235291	Up
SC5D	413.789	876.316	-1.08256	0.000809281	0.0269926	Up
SCD	1425.73	4725.21	-1.72868	1.80012e-05	0.00189645	Up
SCO2	69.2508	299.825	-2.11422	2.20734e-05	0.00215427	Up
SDF4	93.5417	523.086	-2.48337	1.27665e-07	4.45035e-05	Up
SDHAF3	351.569	737.851	-1.06952	0.000284974	0.01323	Up
SDHD	2190.81	5625.83	-1.3606	5.59852e-05	0.0041201	Up
SELENOM	54.1645	308.807	-2.51128	0.00127223	0.0368574	Up
SELENOO	18.6035	90.2315	-2.27806	0.000214718	0.0108382	Up
SERPINE1	1444.94	4064.5	-1.49207	1.90739e-05	0.00196373	Up
SETD9	27.4607	126.516	-2.20387	0.000159086	0.00872042	Up
SFT2D3	171.708	457.39	-1.41346	0.000733041	0.0253664	Up
SFXN1	222.909	1102.58	-2.30636	2.89316e-05	0.00253307	Up
SGSH	2.88324	179.545	-5.96051	1.2785e-05	0.00145164	Up
SHARPIN	15.471	89.407	-2.53082	0.000212577	0.0107808	Up
SHMT1	85.143	402.732	-2.24186	0.00078515	0.0266156	Up
SIPA1L3	44.0212	206.346	-2.2288	4.95735e-06	0.000740621	Up
SIRT6	39.0236	103.829	-1.41179	0.00151633	0.0416153	Up
SIRT7	68.6747	205.857	-1.58379	0.000694773	0.024537	Up
SIVA1	4.96347	199.528	-5.3291	2.21877e-09	1.91682e-06	Up
SLC16A14	1.47227	49.9663	-5.08484	0.000809642	0.0269926	Up
SLC25A14	168.389	402.106	-1.25578	0.000414627	0.017022	Up
SLC39A1	230.279	740.88	-1.68586	7.53581e-06	0.00101862	Up
SLC39A11	70.6887	408.282	-2.53001	6.12269e-05	0.00444007	Up
SLC52A3	32.0663	217.171	-2.7597	2.52485e-05	0.00236645	Up
SLC7A9	10.5619	61.9983	-2.55336	0.00195749	0.0494223	Up
SLX1A	46.2129	454.732	-3.29865	1.9871e-06	0.000346347	Up
SMARCC2	189.057	390.969	-1.04823	0.0016763	0.0443057	Up
SMDT1	160.46	492.201	-1.61704	0.000304604	0.0138081	Up
SNRNP25	273.589	601.567	-1.13671	0.000553498	0.0210357	Up
SOX15	58.4459	159.24	-1.44603	0.000585986	0.0217636	Up
SPACA7	11.81	98.4326	-3.05913	0.00156629	0.042171	Up
SPIRE2	6.81841	49.7683	-2.86772	0.0019358	0.0490576	Up
SPSB3	52.7358	175.616	-1.73557	0.000167118	0.00902348	Up
SRA1	131.331	546.712	-2.05758	1.02558e-06	0.000205842	Up
SRM	986.825	3570.7	-1.85534	0.000300656	0.0137334	Up
SRXN1	68.6933	412.275	-2.58536	8.93529e-06	0.00114545	Up
SSU72	119.448	381.964	-1.67705	7.10745e-07	0.000164215	Up
ST3GAL5	55.2401	283.001	-2.35702	2.80609e-05	0.00253307	Up
STX10	7.54555	72.7395	-3.26904	0.000984117	0.0307106	Up
SUMF2	35.1783	341.618	-3.27963	1.08992e-09	1.20315e-06	Up
SURF2	60.9965	279.562	-2.19637	8.46908e-06	0.00110711	Up
SWSAP1	168.791	379.139	-1.16749	0.000582157	0.0217059	Up
SYNGR1	27.3749	318.748	-3.54149	0.000941977	0.0299473	Up
SYNGR2	163.841	529.722	-1.69294	0.00175285	0.0458277	Up
SYNM	147.954	542.688	-1.87497	0.000129438	0.00760926	Up
TAF15	160.743	422.455	-1.39404	0.000343349	0.0151272	Up
TAF6L	118.564	515.952	-2.12157	2.17587e-05	0.00214033	Up
TANGO2	279.531	603.599	-1.11059	0.000371076	0.0158297	Up
TARS2	240.42	737.637	-1.61736	7.93998e-05	0.00536372	Up
TASP1	275.359	590.131	-1.09972	2.16366e-05	0.00214033	Up
TBC1D13	237.932	603.687	-1.34325	0.0019668	0.0495314	Up
TBC1D4	10.6839	48.7698	-2.19055	0.00124342	0.0361211	Up
TBCD	69.6959	247.098	-1.82594	4.1631e-05	0.00324395	Up
TBK1	121.255	386.601	-1.67281	9.96715e-07	0.000204172	Up
TBL1X	11.3822	131.353	-3.5286	0.0003041	0.0138081	Up
TCEANC	36.8666	148.752	-2.01253	6.61958e-05	0.00471438	Up
TCF25	61.2648	237.123	-1.95251	0.000558449	0.0211763	Up
TCIRG1	75.8742	262.553	-1.79093	0.000745946	0.025688	Up
TECR	299.97	879.266	-1.55148	0.000382848	0.0161169	Up
TEF	9.51334	110.53	-3.53835	1.20004e-06	0.000225973	Up
TEPSIN	2.86916	121.276	-5.40153	7.11681e-06	0.000980978	Up
TEX264	157.848	592.039	-1.90716	6.13348e-08	2.70827e-05	Up
TFAP2A	896.822	2814.91	-1.6502	0.00078628	0.0266156	Up
TFDP1	89.8986	325.799	-1.85761	3.2852e-05	0.00273125	Up
TIMM17A	483.074	1362.3	-1.49573	0.000152687	0.00852214	Up
TIMM21	201.113	893.906	-2.15212	7.98375e-07	0.000170578	Up
TLX3	1.14484	36.0557	-4.97701	0.000235107	0.0115679	Up
TMA16	331.584	760.622	-1.19781	0.000148112	0.00843261	Up
TMBIM1	174.495	522.013	-1.5809	0.000354894	0.0154305	Up
TMED2	1437.57	3198.47	-1.15375	1.07022e-05	0.00130462	Up
TMEM115	83.8353	306.556	-1.87052	8.73383e-05	0.00572981	Up
TMEM144	6.33736	218.424	-5.1071	0.000177135	0.00931132	Up
TMEM161A	29.0472	187.067	-2.68709	3.37775e-10	4.794e-07	Up
TMEM175	20.8839	119.091	-2.5116	0.000929547	0.0297917	Up
TMEM177	3.15311	57.8039	-4.19632	0.000617123	0.0227078	Up
TMEM179B	109.362	357.73	-1.70976	0.00052238	0.0202787	Up
TMEM199	250.827	592.909	-1.24112	0.000664854	0.0237175	Up
TMEM208	132.143	430.012	-1.70227	0.000162048	0.0088216	Up
TMEM222	86.3642	204.492	-1.24354	4.73234e-05	0.00360274	Up
TMEM35B	95.0008	300.169	-1.65976	1.62303e-05	0.0017868	Up
TMEM38B	93.1237	316.522	-1.76509	4.37049e-07	0.000112781	Up
TMEM86A	591.008	5425.67	-3.19855	0.000113524	0.00687723	Up
TMPPE	99.6596	403.987	-2.01923	0.000539465	0.0207736	Up
TNFAIP8L1	22.7487	109.651	-2.26907	0.00133134	0.0381176	Up
TOLLIP	3.89507	300.823	-6.27112	7.44338e-07	0.000167524	Up
TOM1L2	24.2001	222.887	-3.20323	1.06919e-06	0.000212447	Up
TOMM40	20.3078	108.03	-2.41132	0.00072796	0.0252877	Up
TOP3B	23.1704	138.509	-2.57963	0.000664371	0.0237175	Up
TPM4	984.753	8662.62	-3.13697	0.00159077	0.0426898	Up
TPRG1L	35.6726	164.323	-2.20365	2.90024e-05	0.00253307	Up
TPST2	24.4672	105.446	-2.10758	0.000114887	0.00691757	Up
TRAPPC2L	49.1411	438.771	-3.15846	0.000172429	0.00921011	Up
TRIOBP	97.7796	340.256	-1.79902	0.000986449	0.0307106	Up
TRMT1	53.8872	206.034	-1.93487	8.75412e-05	0.00572981	Up
TRMU	30.2922	151.446	-2.32178	0.00172214	0.0452632	Up
TRUB2	112.815	327.915	-1.53936	0.00172178	0.0452632	Up
TSFM	388.947	1292.06	-1.73203	7.96161e-06	0.00105465	Up
TTI1	220.211	554.726	-1.33289	2.3147e-05	0.00220062	Up
TULP3	77.8091	351.063	-2.17372	0.000154227	0.00858398	Up
UBAC1	89.9059	347.629	-1.95106	9.12979e-05	0.00587084	Up
UBALD1	12.2034	80.0239	-2.71315	0.000663219	0.0237175	Up
UBE2D4	3.85203	66.8505	-4.11725	0.000533485	0.0206233	Up
UBE2F	55.8126	179.14	-1.68242	0.000680882	0.0241591	Up
UBE2G2	164.169	509.249	-1.63319	8.31395e-07	0.000175743	Up
UBE2J1	60.0177	239.381	-1.99585	6.1021e-06	0.000878614	Up
UBE3C	38.2731	244.502	-2.67545	0.00187198	0.0481816	Up
UBXN1	188.894	662.934	-1.81129	0.00140213	0.0394623	Up
UGCG	166.865	1336.2	-3.00138	7.6694e-07	0.000169323	Up
UGGT1	469.972	1008.28	-1.10124	0.00136037	0.0385268	Up
ULK3	31.6995	204.954	-2.69277	2.95022e-05	0.00255175	Up
UNC119B	117.204	358.738	-1.6139	4.90432e-06	0.000740606	Up
UNKL	212.322	631.141	-1.57171	8.76629e-05	0.00572981	Up
UQCC	138.682	523.304	-1.91587	6.85823e-05	0.00484957	Up
UROD	130.853	485.074	-1.89026	0.000184884	0.00962747	Up
UROS	40.6793	263.628	-2.69614	1.20978e-07	4.3706e-05	Up
VEGFC	15.0037	107.548	-2.84159	3.63402e-07	9.8915e-05	Up
VPS26B	103.863	310.921	-1.58187	2.21174e-05	0.00215427	Up
VPS33A	193.382	652.771	-1.75512	2.82058e-05	0.00253307	Up
VSTM4	83.3476	319.799	-1.93995	0.00174064	0.0455685	Up
WDR18	79.0499	285.577	-1.85304	3.93081e-05	0.00312421	Up
WDR25	32.9416	116.777	-1.82577	0.000358233	0.015484	Up
WDR45B	237.56	1153.39	-2.27951	0.0002352	0.0115679	Up
WDR6	49.7979	371.236	-2.89818	4.89475e-08	2.26183e-05	Up
WDR81	1.83778	123.769	-6.07354	0.00035066	0.0153134	Up
WISP1	41.0214	260.908	-2.66909	0.00149257	0.041248	Up
XPNPEP1	248.568	587.204	-1.24022	0.000163439	0.00886331	Up
ZC3HAV1L	0.313737	12.5398	-5.32081	0.00130513	0.0375839	Up
ZDHHC7	13.5331	159.73	-3.56107	9.34748e-06	0.00119061	Up
ZFAND2A	564.449	2312.94	-2.03481	0.00120502	0.0354101	Up
ZIC5	17.964	55.1698	-1.61877	0.00120862	0.0354101	Up
ZNF319	22.3601	76.463	-1.77384	0.000520136	0.0202787	Up
ZNF566	346.708	772.392	-1.15561	0.000658104	0.0236894	Up
ZNF623	30.2389	109.773	-1.86004	0.000812121	0.0270299	Up
ZNF692	12.1798	91.3612	-2.90709	2.66853e-07	8.0339e-05	Up
ZNF774	8.4413	79.1284	-3.22866	0.000521392	0.0202787	Up
ZSWIM7	32.8743	161.413	-2.29572	0.00101896	0.0314389	Up
A1BG	4.21589	3.55855	0.244551	0.89947	NA	Stable
A1CF	80.7952	58.018	0.47777	0.504347	0.800337	Stable
A2M	5.78079	2.95424	0.968478	0.557135	0.825701	Stable
A2ML1	23.6741	25.6183	-0.113866	0.877827	0.966116	Stable
A3GALT2	1.34534	0.559048	1.26693	0.848863	NA	Stable
A4GALT	3.37725	62.7245	-4.21511	0.0189502	0.185123	Stable
A4GNT	24.5331	22.3671	0.133355	0.861403	0.959823	Stable
AAAS	664.333	530.469	0.324637	0.255831	0.635103	Stable
AACS	26.5032	35.6166	-0.426382	0.572629	0.833576	Stable
AADACL2	3.05362	0.688562	2.14886	0.622192	NA	Stable
AADACL3	0.0315376	0.0315376	0	1	NA	Stable
AADACL4	0.0389251	0.723201	-4.21563	0.551513	NA	Stable
AADAT	4.11653	18.8161	-2.19247	0.384526	0.733397	Stable
AAED1	75.5886	117.657	-0.638342	0.157735	0.521433	Stable
AAGAB	1652.97	1559.48	0.0839941	0.749105	0.915757	Stable
AAK1	178.7	158.375	0.174194	0.626258	0.858314	Stable
AAMDC	15.86	33.2644	-1.06859	0.390484	0.736769	Stable
AAMP	1165.86	943.516	0.305279	0.318236	0.686351	Stable
AAR2	958.555	906.344	0.0808021	0.79458	0.93439	Stable
AARD	29.6013	22.2693	0.4106	0.564594	0.829314	Stable
AARS	3389.1	5674.57	-0.74361	0.0458949	0.295889	Stable
AARS2	91.7498	78.6463	0.222326	0.717893	0.902236	Stable
AARSD1	632.306	1102.01	-0.801438	0.0105423	0.134366	Stable
AASDH	983.18	727.634	0.434242	0.0567244	0.329662	Stable
AASDHPPT	2957.11	2742.18	0.108864	0.65419	0.873045	Stable
AASS	2119.53	1708.3	0.311185	0.440275	0.766885	Stable
AATF	864.969	829.8	0.059886	0.831906	0.947095	Stable
AATK	2.81628	3.91691	-0.475925	0.632011	NA	Stable
ABAT	28.4213	43.7647	-0.622793	0.308713	0.679435	Stable
ABCA1	799.907	513.186	0.640351	0.00742502	0.109285	Stable
ABCA12	275.973	76.8272	1.84484	0.0362315	0.262293	Stable
ABCA2	32.3993	124.832	-1.94596	0.25417	0.633824	Stable
ABCA3	43.8515	93.7337	-1.09594	0.443655	0.768176	Stable
ABCA4	212.847	189.208	0.169844	0.726832	0.906263	Stable
ABCA5	543.25	318.897	0.768528	0.0567935	0.329774	Stable
ABCA6	7.2296	1.55162	2.22014	0.218591	0.59231	Stable
ABCA7	21.6016	59.4027	-1.45939	0.0892184	0.404465	Stable
ABCB1	7131.09	5518.78	0.369773	0.233187	0.611511	Stable
ABCB10	296.706	179.532	0.724792	0.124118	0.472819	Stable
ABCB11	3.27853	5.32298	-0.699186	0.673011	0.881807	Stable
ABCB4	947.157	678.979	0.480237	0.17686	0.542233	Stable
ABCB5	29.5325	31.5829	-0.096839	0.93434	0.982709	Stable
ABCB7	1244.95	915.287	0.443791	0.156409	0.520056	Stable
ABCB8	120.142	176.554	-0.555363	0.429755	0.761343	Stable
ABCB9	25.8517	22.0217	0.231332	0.664156	0.87755	Stable
ABCC1	299.683	301.111	-0.00685742	0.985944	1	Stable
ABCC10	16.5125	97.8871	-2.56756	0.036646	0.263739	Stable
ABCC11	0.362508	6.80311	-4.23011	0.0167988	NA	Stable
ABCC12	2.9715	0.229972	3.69166	0.161521	NA	Stable
ABCC2	4870.53	3600.11	0.436039	0.0957921	0.419526	Stable
ABCC3	324.282	304.121	0.0926037	0.795239	0.934835	Stable
ABCC4	59.1669	52.4837	0.172921	0.688431	0.889101	Stable
ABCC5	511.92	704.483	-0.460646	0.0220027	0.201379	Stable
ABCC6	72.1073	38.8701	0.891485	0.106904	0.440573	Stable
ABCC8	2.31905	4.20208	-0.85757	0.67875	NA	Stable
ABCC9	0.673725	2.58875	-1.94203	0.436362	NA	Stable
ABCD1	5.08117	80.8524	-3.99206	0.0141245	0.157937	Stable
ABCD2	8.32112	6.846	0.281515	0.805326	0.938418	Stable
ABCD3	1853.98	1400.24	0.404952	0.124884	0.473692	Stable
ABCD4	88.0625	79.0855	0.155115	0.786861	0.931839	Stable
ABCE1	1825.95	2753.23	-0.59248	0.0329028	0.248302	Stable
ABCF1	1907.79	1688.5	0.176162	0.441979	0.767736	Stable
ABCF2	1670.19	1393.14	0.261665	0.192063	0.561679	Stable
ABCF3	7289.64	6182.35	0.237691	0.306804	0.67782	Stable
ABCG1	7.45378	16.975	-1.18737	0.485673	0.791119	Stable
ABCG2	1080.2	1154.17	-0.0955556	0.834655	0.948293	Stable
ABCG4	14.1819	5.65198	1.32722	0.328154	0.693611	Stable
ABCG5	5565.01	4526.39	0.298021	0.409805	0.748835	Stable
ABCG8	18.8195	13.3508	0.4953	0.62128	0.855739	Stable
ABHD1	26.3984	34.0103	-0.365517	0.622376	0.856245	Stable
ABHD10	332.875	471.995	-0.503794	0.0595002	0.335586	Stable
ABHD11	704.874	726.785	-0.0441623	0.880108	0.966372	Stable
ABHD12B	915.066	591.682	0.629053	0.0468795	0.299092	Stable
ABHD13	436.541	587.535	-0.428555	0.245972	0.625412	Stable
ABHD15	4.18632	10.7053	-1.35457	0.376026	0.727662	Stable
ABHD16A	241.599	308.08	-0.350688	0.284869	0.659362	Stable
ABHD16B	0.529264	0.529264	0	1	NA	Stable
ABHD17A	42.0231	211.708	-2.33282	0.00793981	0.113605	Stable
ABHD17B	591.191	1338.49	-1.1789	0.0260699	0.219775	Stable
ABHD17C	455.993	355.071	0.360902	0.319012	0.687035	Stable
ABHD18	671.683	442.504	0.602089	0.0299773	0.237311	Stable
ABHD2	457.347	524.529	-0.197733	0.501931	0.799596	Stable
ABHD3	241.219	234.395	0.0414005	0.930809	0.981996	Stable
ABHD4	1437.38	1054.35	0.447086	0.228032	0.60494	Stable
ABHD5	475.798	681.19	-0.517708	0.156633	0.520364	Stable
ABHD6	119.302	90.8165	0.393596	0.458051	0.776784	Stable
ABHD8	20.3507	7.39955	1.45957	0.329827	0.694905	Stable
ABI1	8804.93	5729.47	0.61991	0.00929082	0.124904	Stable
ABI2	218.05	294.788	-0.435022	0.0908971	0.408944	Stable
ABI3BP	787.45	674.281	0.223837	0.588869	0.841908	Stable
ABL1	1044.87	923.533	0.178091	0.596108	0.845691	Stable
ABL2	1079.13	1361.2	-0.335008	0.307898	0.678808	Stable
ABLIM1	565.658	388.877	0.540617	0.121521	0.468221	Stable
ABLIM2	0.247296	7.32552	-4.88862	0.0148028	NA	Stable
ABLIM3	28.3933	44.314	-0.642208	0.314307	0.683442	Stable
ABO	3.37045	1.20619	1.48249	0.499109	NA	Stable
ABR	555.2	455.791	0.284635	0.443227	0.768176	Stable
ABRA	4.18774	0.109002	5.26374	0.0906153	NA	Stable
ABRACL	1115.28	1149.85	-0.044034	0.863528	0.960563	Stable
ABRAXAS1	734.322	992.452	-0.434583	0.237945	0.616885	Stable
ABRAXAS2	1018.92	855.171	0.252754	0.114216	0.454623	Stable
ABT1	1910.17	1290.7	0.565543	0.0164758	0.171669	Stable
ABTB1	85.9188	90.3192	-0.0720578	0.90681	0.973445	Stable
ABTB2	204.021	196.482	0.0543184	0.882361	0.966884	Stable
ACAA2	320.623	304.905	0.0725157	0.865484	0.961057	Stable
ACACA	1023.43	708.706	0.530151	0.0468872	0.299092	Stable
ACACB	34.2386	26.5794	0.365317	0.603074	0.84861	Stable
ACAD10	106.478	168.006	-0.657959	0.11638	0.458825	Stable
ACAD11	395.422	272.283	0.538288	0.0729074	0.368416	Stable
ACAD8	410.428	429.131	-0.0642877	0.809506	0.939276	Stable
ACADL	296.132	505.194	-0.770599	0.102633	0.431949	Stable
ACADM	2990.6	4591.75	-0.61861	0.0400344	0.276173	Stable
ACADS	309.303	542.88	-0.811611	0.0370702	0.26534	Stable
ACADSB	353.523	476.84	-0.431701	0.175252	0.541045	Stable
ACADVL	699.059	1195.04	-0.773571	0.0163431	0.171016	Stable
ACAN	0.485361	9.76797	-4.33093	0.0376974	0.267774	Stable
ACAP1	57.9331	48.5127	0.256025	0.702665	0.896453	Stable
ACAP2	884.624	774.63	0.191558	0.276061	0.650922	Stable
ACAP3	39.2928	88.3262	-1.16857	0.457501	0.776684	Stable
ACAT1	2083.29	2290.58	-0.136848	0.597796	0.846442	Stable
ACBD3	288.119	275.089	0.0667619	0.800278	0.937093	Stable
ACBD4	14.2641	43.6121	-1.61234	0.144028	0.503367	Stable
ACBD5	1239.33	883.185	0.48877	0.035659	0.259468	Stable
ACBD6	248.529	358.326	-0.527858	0.316486	0.684954	Stable
ACBD7	434.026	328.759	0.400749	0.17588	0.541387	Stable
ACCS	11.0366	18.5562	-0.749605	0.236271	0.614571	Stable
ACCSL	38902.5	29239.8	0.411931	0.202214	0.573123	Stable
ACD	118.309	171.603	-0.536512	0.0902464	0.406897	Stable
ACE	1.52667	4.07197	-1.41533	0.608179	NA	Stable
ACE2	1.59324	6.45448	-2.01834	0.167222	NA	Stable
ACER1	64.9504	37.4998	0.792457	0.0474529	0.301075	Stable
ACER2	11.3121	15.3397	-0.439404	0.660645	0.876022	Stable
ACER3	1048.76	968.67	0.114606	0.562199	0.828209	Stable
ACHE	14.6287	7.09859	1.04319	0.468985	0.782299	Stable
ACIN1	1390.58	1355.75	0.0366032	0.890804	0.969347	Stable
ACKR1	1.1358	9.40681	-3.05	0.368122	0.721477	Stable
ACKR2	144.494	77.5422	0.897957	0.158926	0.523101	Stable
ACKR3	92.3204	76.5905	0.269485	0.94806	0.98721	Stable
ACKR4	9.12268	2.48789	1.87453	0.257252	0.636405	Stable
ACLY	1125.66	1380.26	-0.294159	0.368171	0.721477	Stable
ACMSD	0.255892	8.12395	-4.98858	0.00406704	NA	Stable
ACO1	864.295	568.426	0.60455	0.0492038	0.306099	Stable
ACO2	1173.96	1559.11	-0.409334	0.1783	0.543879	Stable
ACOD1	2.52914	3.37688	-0.417045	0.864642	NA	Stable
ACOT11	692.655	2081.94	-1.58772	0.0196547	0.188758	Stable
ACOT12	5.79713	6.6213	-0.191776	0.818497	0.941831	Stable
ACOT13	2433.43	1635.92	0.572887	0.143756	0.503029	Stable
ACOT6	110.331	282.469	-1.35626	0.060262	0.337445	Stable
ACOT8	73.8077	142.497	-0.949089	0.10959	0.445631	Stable
ACOT9	1162.61	1174.58	-0.0147792	0.955649	0.989722	Stable
ACOX1	6375.74	4746.25	0.425805	0.0392311	0.273612	Stable
ACOX2	43.011	63.3746	-0.559198	0.304983	0.676992	Stable
ACOX3	60.6323	85.6239	-0.497926	0.577055	0.83602	Stable
ACOXL	1.21133	5.99865	-2.30805	0.212019	NA	Stable
ACP1	3034.75	4418.98	-0.542137	0.0996119	0.426847	Stable
ACP2	57.3517	149.05	-1.37789	0.00507192	0.0878255	Stable
ACP5	4.36894	14.4282	-1.72353	0.273129	0.647313	Stable
ACP6	340.757	302.895	0.169926	0.78815	0.931897	Stable
ACP7	25.0421	51.7192	-1.04635	0.0825046	0.39107	Stable
ACPP	43.2948	32.1568	0.429073	0.530254	0.813436	Stable
ACPT	75.0101	67.9545	0.142517	0.819559	0.942563	Stable
ACR	1.31919	2.15587	-0.708621	0.704453	NA	Stable
ACRBP	3.42935	9.83904	-1.52058	0.216984	0.590532	Stable
ACRV1	39.3003	13.1474	1.57976	0.00595673	0.0964285	Stable
ACSBG1	1650.68	1753.27	-0.0869862	0.703668	0.896907	Stable
ACSBG2	3.10398	1.03545	1.58386	0.6192	NA	Stable
ACSF2	87.5242	109.798	-0.327101	0.721875	0.903993	Stable
ACSF3	56.8928	58.9089	-0.0502377	0.949097	0.987669	Stable
ACSL1	444.848	429.877	0.0493867	0.809456	0.939276	Stable
ACSL3	9573.48	7853.46	0.285715	0.330687	0.694905	Stable
ACSL4	481.319	354.323	0.441929	0.408102	0.74764	Stable
ACSL5	396.996	292.504	0.44067	0.260701	0.638835	Stable
ACSL6	582.468	1362.5	-1.226	0.104623	0.436826	Stable
ACSM2B	8.94966	1.9419	2.20436	0.246583	0.625747	Stable
ACSM3	139.615	107.013	0.383674	0.278847	0.653323	Stable
ACSM4	19.998	23.9663	-0.261149	0.697214	0.893611	Stable
ACSM5	2.39211	0.161754	3.88641	0.303667	NA	Stable
ACSS1	2.1492	1.78799	0.265467	0.911298	NA	Stable
ACSS2	389.307	272.686	0.513667	0.153587	0.516549	Stable
ACSS3	300.326	232.847	0.367144	0.293703	0.667416	Stable
ACTA1	12.4691	47.2296	-1.92133	0.163216	0.527847	Stable
ACTB	8619.64	11962.8	-0.472849	0.367425	0.721082	Stable
ACTBL2	0.115356	0.115356	0	1	NA	Stable
ACTC1	23.6791	14.1198	0.745896	0.330258	0.694905	Stable
ACTG1	19308.5	19508.1	-0.0148332	0.957645	0.990316	Stable
ACTG2	1747.64	1444.55	0.274791	0.842031	0.951195	Stable
ACTL10	1.53089	4.4789	-1.54878	0.565893	NA	Stable
ACTL6A	1878.62	2462.42	-0.390405	0.260474	0.638493	Stable
ACTL6B	3.48339	1.91267	0.864905	0.624662	NA	Stable
ACTL7A	0.0936854	0.295211	-1.65585	0.816504	NA	Stable
ACTL7B	69.2293	35.8973	0.947506	0.227372	0.604774	Stable
ACTL8	493.469	389.539	0.341191	0.547488	0.821336	Stable
ACTL9	0.83708	0.83708	0	1	NA	Stable
ACTN1	2518.43	2199.06	0.195633	0.76093	0.920637	Stable
ACTN2	23.8199	25.1596	-0.0789394	0.911938	0.975065	Stable
ACTN3	2.28074	3.45792	-0.600401	0.742919	NA	Stable
ACTN4	1167	1165.67	0.00164929	0.994826	1	Stable
ACTR10	2119.83	1931.22	0.134431	0.613979	0.852492	Stable
ACTR1A	920.775	891.837	0.0460684	0.856651	0.957476	Stable
ACTR2	3963.46	3189.29	0.313524	0.152684	0.515969	Stable
ACTR3	3275.61	3363.55	-0.0382177	0.84128	0.950796	Stable
ACTR3B	136.49	115.066	0.246335	0.701967	0.896283	Stable
ACTR5	80.1385	75.582	0.0844536	0.88563	0.968028	Stable
ACTR6	1316.05	1111.93	0.243144	0.385818	0.733959	Stable
ACTR8	1082.53	1218.1	-0.170224	0.336243	0.699451	Stable
ACTRT2	0.104055	0.589738	-2.50272	0.724677	NA	Stable
ACTRT3	16.6738	2.811	2.56843	0.0222537	0.202796	Stable
ACVR1	270.575	444.682	-0.716746	0.0287433	0.231884	Stable
ACVR1B	447.03	362.034	0.304246	0.465252	0.780044	Stable
ACVR1C	0.444852	1.32215	-1.57148	0.757684	NA	Stable
ACVR2A	223.99	296.989	-0.406979	0.0967806	0.421532	Stable
ACVR2B	475.949	325.656	0.547455	0.0547687	0.324953	Stable
ACVRL1	17.8456	11.9176	0.582479	0.455194	0.776135	Stable
ACY1	570.668	915.186	-0.681412	0.37878	0.729793	Stable
ACY3	0.302514	3.71972	-3.62012	0.103983	NA	Stable
ACYP1	669.182	651.593	0.0384278	0.904892	0.973165	Stable
ACYP2	5020.48	3672.62	0.451017	0.352071	0.710435	Stable
ADA	135.038	168.031	-0.315364	0.413612	0.751094	Stable
ADA2	16.6938	19.4536	-0.220731	0.808605	0.939276	Stable
ADAD1	961.811	831.972	0.209217	0.450471	0.773092	Stable
ADAD2	2.28232	0.919348	1.31182	0.594382	NA	Stable
ADAL	236.542	359.956	-0.605721	0.0178697	0.180422	Stable
ADAM10	603.909	433.321	0.478896	0.0554511	0.32622	Stable
ADAM11	10.4124	29.7243	-1.51334	0.0330248	0.248939	Stable
ADAM12	412.086	370.933	0.151787	0.685198	0.887491	Stable
ADAM15	27.8534	73.1128	-1.39227	0.127692	0.478366	Stable
ADAM17	1377.37	1036.04	0.410831	0.10063	0.428872	Stable
ADAM19	1020.93	940.41	0.118521	0.728826	0.907493	Stable
ADAM2	1.61649	1.61649	0	1	NA	Stable
ADAM22	69.0214	40.1994	0.779868	0.0734972	0.369637	Stable
ADAM23	15.8456	24.9053	-0.652367	0.546997	0.821103	Stable
ADAM28	2.14726	2.14726	0	1	NA	Stable
ADAM29	9.05553	0.686757	3.72093	0.0619192	0.34157	Stable
ADAM30	0.0899802	0.0899802	0	1	NA	Stable
ADAM33	121.471	88.3178	0.459831	0.510627	0.804216	Stable
ADAM3A	32.0469	37.0527	-0.209394	0.816676	0.941007	Stable
ADAM5	15.3711	8.78354	0.807343	0.609122	0.851204	Stable
ADAM7	7.83983	3.39038	1.20938	0.385975	0.73411	Stable
ADAM8	65.4192	37.9396	0.78601	0.535028	0.814962	Stable
ADAM9	485.481	851.81	-0.811118	0.0843649	0.394744	Stable
ADAMDEC1	15.9467	7.72379	1.04588	0.770948	0.924948	Stable
ADAMTS10	82.2668	90.6842	-0.140541	0.821918	0.943546	Stable
ADAMTS12	687.633	496.543	0.46972	0.244579	0.62361	Stable
ADAMTS13	85.415	17.9895	2.24734	0.0554366	0.32622	Stable
ADAMTS14	63.257	33.6259	0.911652	0.119994	0.465735	Stable
ADAMTS15	1.35577	10.7987	-2.99368	0.156896	0.520715	Stable
ADAMTS16	0.32743	3.74099	-3.51416	0.0848831	NA	Stable
ADAMTS17	47.4841	94.1708	-0.987835	0.0605842	0.338529	Stable
ADAMTS18	122.229	79.3793	0.622755	0.423381	0.757494	Stable
ADAMTS19	53.8154	28.7037	0.906781	0.156452	0.520056	Stable
ADAMTS2	178.154	304.492	-0.77328	0.176115	0.541704	Stable
ADAMTS20	7.22642	23.93	-1.72747	0.140876	0.49917	Stable
ADAMTS3	24.2393	24.8113	-0.0336483	0.956336	0.989823	Stable
ADAMTS4	15.6006	19.566	-0.326744	0.801513	0.937131	Stable
ADAMTS5	205.767	92.5129	1.15328	0.129142	0.480711	Stable
ADAMTS6	232.076	336.603	-0.536454	0.251537	0.631144	Stable
ADAMTS7	185.86	162.056	0.197727	0.517634	0.807014	Stable
ADAMTS9	287.485	194.637	0.562705	0.272568	0.647006	Stable
ADAMTSL1	258.949	152.895	0.760127	0.0461196	0.29676	Stable
ADAMTSL2	1.32161	4.00149	-1.59824	0.507546	NA	Stable
ADAMTSL3	146.235	168.707	-0.206236	0.730136	0.908301	Stable
ADAMTSL4	115.884	238.71	-1.04258	0.0219928	0.201379	Stable
ADAMTSL5	121.721	133.392	-0.132098	0.754855	0.918991	Stable
ADAP1	28.327	52.2308	-0.882725	0.270416	0.645503	Stable
ADAP2	21.5825	23.3658	-0.114538	0.840722	0.950704	Stable
ADAR	560.649	449.212	0.319701	0.319667	0.687227	Stable
ADARB1	11.3647	52.6798	-2.21269	0.0965218	0.421144	Stable
ADARB2	10.4777	24.3626	-1.21734	0.292122	0.665801	Stable
ADAT1	323.591	346.649	-0.0993051	0.682079	0.885804	Stable
ADAT3	49.5978	55.3398	-0.158043	0.830378	0.946737	Stable
ADCK1	236.226	161.438	0.549182	0.0949279	0.417859	Stable
ADCK2	363.659	460.537	-0.340729	0.377384	0.728788	Stable
ADCK5	32.0604	82.1121	-1.3568	0.0211007	0.19638	Stable
ADCY1	2.24253	0.238696	3.23188	0.307322	NA	Stable
ADCY10	157.625	136.485	0.207756	0.63057	0.860657	Stable
ADCY2	10.9706	6.91971	0.664854	0.417485	0.753016	Stable
ADCY3	223.57	176.675	0.339629	0.323799	0.690171	Stable
ADCY4	26.7344	23.6698	0.17565	0.827334	0.945811	Stable
ADCY5	17.3716	24.9122	-0.52012	0.463604	0.779435	Stable
ADCY6	173.561	94.4276	0.878158	0.303697	0.675675	Stable
ADCY7	419.742	585.002	-0.478938	0.546857	0.821077	Stable
ADCY8	25.1384	27.8759	-0.149126	0.89079	0.969347	Stable
ADCY9	247.406	213.185	0.214777	0.569364	0.832347	Stable
ADCYAP1	105.182	138.234	-0.394213	0.510013	0.803708	Stable
ADCYAP1R1	512.154	408.3	0.326947	0.389828	0.736395	Stable
ADD1	252.723	435.615	-0.785494	0.109436	0.445593	Stable
ADD2	26.8041	30.5201	-0.187307	0.8682	0.96199	Stable
ADD3	918.935	654.004	0.490664	0.134372	0.488403	Stable
ADGB	54.7229	34.983	0.645491	0.17892	0.54475	Stable
ADGRA1	1.62207	1.62207	0	1	NA	Stable
ADGRA2	672.36	592.383	0.182703	0.577361	0.836115	Stable
ADGRA3	1201.35	959.462	0.32436	0.275178	0.649921	Stable
ADGRB1	5.20703	0.33309	3.96648	0.129783	NA	Stable
ADGRB2	28.9298	31.3983	-0.118131	0.928504	0.981454	Stable
ADGRB3	106.089	87.6575	0.275323	0.643098	0.867289	Stable
ADGRD1	21.2298	31.8197	-0.583828	0.486	0.791119	Stable
ADGRD2	0.576882	5.62956	-3.28667	0.127279	NA	Stable
ADGRE1	26.1954	16.8226	0.638908	0.520503	0.808821	Stable
ADGRE3	11.5928	24.7109	-1.09191	0.475607	0.786576	Stable
ADGRE5	297.737	296.887	0.00412436	0.995052	1	Stable
ADGRF1	1.36954	1.36954	0	1	NA	Stable
ADGRF2	21.6687	23.361	-0.108494	0.937491	0.983148	Stable
ADGRF3	1.08997	7.67369	-2.81564	0.130365	0.482297	Stable
ADGRF4	4.21253	0.183142	4.52365	0.271645	NA	Stable
ADGRF5	1.88101	0.351959	2.41803	0.320619	NA	Stable
ADGRG1	570.978	470.834	0.278216	0.584482	0.840048	Stable
ADGRG2	91.2079	70.7965	0.36548	0.471995	0.784421	Stable
ADGRG3	0.322818	1.16656	-1.85347	0.669744	NA	Stable
ADGRG4	49.8594	53.0275	-0.0888769	0.912981	0.975162	Stable
ADGRG5	19.8257	10.5392	0.911612	0.325911	0.691308	Stable
ADGRG6	165.474	353.99	-1.0971	0.0477192	0.301545	Stable
ADGRG7	411.571	305.261	0.431101	0.430899	0.761897	Stable
ADGRL1	126.79	176.417	-0.476546	0.404373	0.745823	Stable
ADGRL2	148.143	154.022	-0.0561471	0.864086	0.960686	Stable
ADGRL3	101.256	78.6662	0.36419	0.302922	0.675086	Stable
ADGRL4	1.35435	1.91974	-0.503313	0.89	NA	Stable
ADGRV1	122.4	89.2824	0.455154	0.263834	0.640582	Stable
ADH1C	23.4746	4.79859	2.29042	0.0752817	0.373691	Stable
ADH4	12.209	4.29379	1.50762	0.175573	0.541332	Stable
ADH5	8158.46	6592.76	0.307414	0.348088	0.70741	Stable
ADHFE1	33.7042	39.2055	-0.218124	0.727601	0.906813	Stable
ADI1	76.3682	221.76	-1.53796	0.00888299	0.121393	Stable
ADIG	1.89288	5.31302	-1.48895	0.369655	NA	Stable
ADIPOQ	0.953639	2.26578	-1.24849	0.600198	NA	Stable
ADIPOR1	1442.09	1508.27	-0.0647283	0.761657	0.920885	Stable
ADIPOR2	1834.26	1944.99	-0.0845689	0.678657	0.884199	Stable
ADIRF	4.83585	8.81913	-0.866867	0.554413	0.824318	Stable
ADM	119.477	298.196	-1.31952	0.0210725	0.196305	Stable
ADM2	7.45219	7.45219	0	1	1	Stable
ADM5	8.48513	4.89597	0.79334	0.559202	0.826421	Stable
ADNP	669.422	349.457	0.937801	0.0132794	0.152345	Stable
ADNP2	751.457	553.984	0.439846	0.110782	0.44786	Stable
ADO	152.631	263.528	-0.78791	0.0356622	0.259468	Stable
ADORA1	4.50655	17.048	-1.91951	0.06563	0.349952	Stable
ADORA2A	34.2954	82.9382	-1.27402	0.0625844	0.34286	Stable
ADORA2B	12.6206	69.1405	-2.45375	0.106326	0.440214	Stable
ADORA3	0.493941	1.50929	-1.61146	0.807015	NA	Stable
ADPGK	3777.52	2888.31	0.387212	0.197857	0.567691	Stable
ADPRH	122.127	161.461	-0.402804	0.429251	0.760851	Stable
ADPRHL1	2.42619	3.35856	-0.469153	0.823109	NA	Stable
ADPRM	1744.44	1373.99	0.344389	0.124872	0.473692	Stable
ADRA1A	3.65492	0.188273	4.27894	0.193541	NA	Stable
ADRA1B	53.828	38.3259	0.490038	0.437927	0.766054	Stable
ADRA1D	1.80658	1.80658	0	1	NA	Stable
ADRA2A	0.0862491	0.0862491	0	1	NA	Stable
ADRA2B	1.35995	2.14381	-0.65662	0.91974	NA	Stable
ADRA2C	1.7658	1.7658	0	1	NA	Stable
ADRB1	0.0625466	0.0625466	0	1	NA	Stable
ADRB2	4.10731	4.16301	-0.0194323	0.993657	NA	Stable
ADRB3	0.604643	0.489226	0.305584	0.964296	NA	Stable
ADRM1	79.5333	309.584	-1.9607	0.0255496	0.217139	Stable
ADSS	852.834	545.568	0.644507	0.122542	0.469777	Stable
ADSSL1	3.28686	6.00667	-0.869856	0.675482	0.882666	Stable
ADTRP	16.4755	3.39834	2.27741	0.146891	0.507482	Stable
AEBP1	2949.26	661.598	2.15633	0.17492	0.541045	Stable
AEBP2	2339.21	2998.7	-0.358316	0.454939	0.776129	Stable
AES	310.871	197.317	0.655799	0.259749	0.638044	Stable
AFAP1L1	15.5751	13.0419	0.256091	0.868902	0.962325	Stable
AFAP1L2	593.527	474.477	0.322975	0.44928	0.772187	Stable
AFDN	489.093	416.524	0.231708	0.513853	0.805303	Stable
AFF1	739.389	658.248	0.167702	0.675832	0.882777	Stable
AFF2	670.702	502.471	0.416631	0.372125	0.724711	Stable
AFF3	284.603	174.488	0.70582	0.0871082	0.399767	Stable
AFF4	1567.27	1148.04	0.44908	0.0736569	0.369959	Stable
AFG1L	134.184	89.8235	0.579045	0.125931	0.475522	Stable
AFG3L2	525.95	824.151	-0.647982	0.0729393	0.368416	Stable
AFM	0.412069	0.412069	0	1	NA	Stable
AFMID	673.137	604.4	0.155396	0.721178	0.90342	Stable
AFP	3.02285	0.0602286	5.64932	0.19892	NA	Stable
AFTPH	1647.16	1108.14	0.571842	0.00439492	0.0808584	Stable
AGA	435.606	364.015	0.259025	0.454238	0.775548	Stable
AGAP1	89.6792	123.263	-0.45889	0.296649	0.669662	Stable
AGAP2	5.53102	8.44016	-0.609726	0.540286	0.817826	Stable
AGAP3	34.9198	126.537	-1.85744	0.0020901	0.0517189	Stable
AGBL1	282.166	237.105	0.251019	0.621149	0.855674	Stable
AGBL2	353.499	249.601	0.502083	0.102476	0.431854	Stable
AGBL3	142.828	187.181	-0.390159	0.148043	0.508841	Stable
AGBL4	122.795	113.798	0.109786	0.740096	0.912116	Stable
AGBL5	511.998	554.548	-0.115176	0.772151	0.925327	Stable
AGER	0.0905285	0.548769	-2.59976	0.714366	NA	Stable
AGFG1	1597.3	1482.14	0.10795	0.574057	0.834365	Stable
AGFG2	50.112	102.665	-1.03472	0.0196363	0.188717	Stable
AGGF1	509.069	441.396	0.205789	0.348797	0.708216	Stable
AGK	1018.68	820.734	0.31172	0.257302	0.636449	Stable
AGMAT	29.4514	16.3071	0.852835	0.242594	0.621775	Stable
AGMO	454.634	320.972	0.502255	0.412618	0.750879	Stable
AGO1	266.949	185.916	0.521915	0.114973	0.456086	Stable
AGO2	188.637	182.751	0.0457337	0.905366	0.973244	Stable
AGO3	275.645	458.16	-0.733042	0.0220005	0.201379	Stable
AGO4	25.4489	76.2677	-1.58347	0.139592	0.496881	Stable
AGPAT1	141.502	142.704	-0.0122055	0.979057	0.997787	Stable
AGPAT2	71.5704	96.8188	-0.435923	0.505926	0.801303	Stable
AGPAT3	87.9817	152.28	-0.791453	0.24865	0.628426	Stable
AGPAT4	201.824	208.984	-0.0502932	0.873544	0.963974	Stable
AGPAT5	1611.3	2236.04	-0.472718	0.0115696	0.141739	Stable
AGPS	1690.13	1247.13	0.438529	0.106961	0.440573	Stable
AGR2	123.416	234.505	-0.926096	0.0940694	0.416016	Stable
AGRN	225.717	76.7578	1.55613	0.0841344	0.394101	Stable
AGRP	0.452473	0.713271	-0.656618	0.926983	NA	Stable
AGT	5.06717	5.06717	0	1	1	Stable
AGTPBP1	329.793	223.629	0.560452	0.178049	0.543481	Stable
AGTR1	258.777	107.803	1.26331	0.0531027	0.319163	Stable
AGTR2	0.270811	0.0225359	3.58699	0.613161	NA	Stable
AGTRAP	423.487	428.034	-0.0154082	0.96849	0.994054	Stable
AGXT	0.659433	2.03138	-1.62316	0.694754	NA	Stable
AGXT2	12.3465	3.69398	1.74086	0.266995	0.642899	Stable
AHCTF1	2386.56	1469.03	0.700064	0.0154471	0.165904	Stable
AHCY	392.817	415.136	-0.079725	0.823143	0.943892	Stable
AHCYL1	249.221	313.52	-0.33113	0.455988	0.776135	Stable
AHCYL2	89.324	58.733	0.604877	0.273004	0.647159	Stable
AHDC1	82.5738	107.475	-0.380245	0.828724	0.946167	Stable
AHI1	1179.32	1084.71	0.120639	0.717839	0.902236	Stable
AHNAK	3031.38	3592.01	-0.244818	0.77929	0.928459	Stable
AHNAK2	2.50422	103.312	-5.3665	0.0233887	0.20664	Stable
AHR	332.847	436.088	-0.389759	0.321016	0.687648	Stable
AHRR	99.5735	109.363	-0.135294	0.894512	0.970125	Stable
AHSA1	5431.53	4711.1	0.205294	0.518778	0.807897	Stable
AHSA2	498.893	393.912	0.340859	0.376254	0.727836	Stable
AHSG	240.516	143.771	0.742363	0.173723	0.539609	Stable
AHSP	7.9378	6.02546	0.397666	0.762046	0.920885	Stable
AICDA	330.124	178.024	0.890936	0.210001	0.58205	Stable
AIDA	1010.33	817.1	0.306238	0.317312	0.685473	Stable
AIF1	204.014	440.329	-1.10991	0.229499	0.606834	Stable
AIF1L	102.1	31.2778	1.70677	0.0623337	0.342241	Stable
AIFM1	546.823	393.55	0.474528	0.10689	0.440573	Stable
AIFM2	43.4022	155.324	-1.83944	0.0486241	0.304451	Stable
AIFM3	1.01433	1.59898	-0.656631	0.846067	NA	Stable
AIG1	81.4268	63.9389	0.348811	0.530033	0.813282	Stable
AIMP1	1192.1	2122.64	-0.832358	0.0115508	0.141739	Stable
AIMP2	358.783	359.579	-0.0031958	0.99382	1	Stable
AIP	225.852	181.564	0.314897	0.400688	0.743377	Stable
AIPL1	23.3758	22.7654	0.0381682	0.944637	0.985195	Stable
AIRE	0.255585	0.785701	-1.62017	0.780385	NA	Stable
AJAP1	6.80602	4.88656	0.477992	0.791294	0.933172	Stable
AJUBA	432.57	255.743	0.75824	0.0731502	0.368914	Stable
AK1	0.34762	21.5445	-5.95366	0.00206758	0.0513535	Stable
AK2	3261.07	3120.36	0.0636319	0.813774	0.94061	Stable
AK3	54.1649	71.1061	-0.392614	0.63786	0.86434	Stable
AK4	1125.38	1599.73	-0.507423	0.318793	0.686833	Stable
AK5	0.383806	14.1456	-5.20383	0.00570501	0.0943731	Stable
AK6	1399.1	2587.19	-0.886884	0.019641	0.188717	Stable
AK7	6.61597	6.0566	0.127444	0.916217	0.976666	Stable
AK8	6.94015	17.8632	-1.36395	0.149502	0.510851	Stable
AK9	370.571	294.778	0.330121	0.398089	0.741969	Stable
AKAIN1	15193.1	10253.5	0.567309	0.0674157	0.355036	Stable
AKAP1	201.844	162.864	0.309573	0.317006	0.68526	Stable
AKAP10	163.418	150.829	0.115648	0.784241	0.930998	Stable
AKAP11	2140.5	1542.77	0.472422	0.125003	0.473692	Stable
AKAP12	245.515	227.972	0.106955	0.772129	0.925327	Stable
AKAP13	1395.52	1299.95	0.102353	0.68716	0.888692	Stable
AKAP14	107.255	98.5521	0.122082	0.772033	0.925327	Stable
AKAP17A	96.7072	134.886	-0.480047	0.310115	0.679972	Stable
AKAP17B	1775.85	1304.62	0.44488	0.18062	0.546397	Stable
AKAP2	226.541	243.605	-0.104772	0.858496	0.958494	Stable
AKAP3	62.5995	143.95	-1.20134	0.00330702	0.067673	Stable
AKAP4	15.0219	14.7711	0.0242841	0.977286	0.997261	Stable
AKAP5	269.544	515.332	-0.934981	0.0300912	0.237557	Stable
AKAP6	99.0202	96.7561	0.0333703	0.958382	0.990536	Stable
AKAP7	175.532	104.132	0.753317	0.0472897	0.300935	Stable
AKAP8	2907.08	2134.3	0.445808	0.114062	0.454351	Stable
AKAP8L	3185.18	2493.96	0.352933	0.203811	0.574756	Stable
AKAP9	3330.72	2887.78	0.205874	0.202262	0.573123	Stable
AKIP1	376.169	704.926	-0.906089	0.0150666	0.163592	Stable
AKIRIN1	138.586	289.892	-1.06473	0.0023292	0.0553604	Stable
AKIRIN2	50183.1	46357.8	0.114388	0.78883	0.932202	Stable
AKNA	49.7712	76.5193	-0.620513	0.551843	0.823269	Stable
AKNAD1	32.9319	27.3471	0.268096	0.676561	0.883147	Stable
AKR1A1	166.737	201.011	-0.269704	0.576717	0.835778	Stable
AKR1B1	2605.47	2332.44	0.159706	0.616337	0.853244	Stable
AKR1C1	59.9661	31.8325	0.913646	0.168461	0.533524	Stable
AKR1CL1	732.961	618.678	0.244548	0.666221	0.878294	Stable
AKR1D1	8.09937	13.1743	-0.701844	0.509081	0.803074	Stable
AKR7A2	63.2335	131.305	-1.05416	0.063447	0.344326	Stable
AKT1	213.851	334.455	-0.64521	0.346761	0.707406	Stable
AKT1S1	102.551	102.84	-0.00405639	0.992037	1	Stable
AKT2	380.916	438.339	-0.202573	0.469916	0.78293	Stable
AKT3	2240.33	1957.51	0.194692	0.509322	0.803074	Stable
AKTIP	6086.48	4679.11	0.379375	0.328684	0.694244	Stable
ALAD	245.254	506.646	-1.0467	0.0115703	0.141739	Stable
ALAS2	5.30001	6.25626	-0.239307	0.864859	0.960875	Stable
ALB	97.6347	79.7162	0.29252	0.624981	0.857481	Stable
ALCAM	322.25	334.917	-0.0556252	0.831533	0.946906	Stable
ALDH16A1	113.691	151.687	-0.415972	0.327368	0.693033	Stable
ALDH18A1	1711.02	1255.74	0.44632	0.0881622	0.401785	Stable
ALDH1A1	18.1716	8.79644	1.0467	0.378923	0.729857	Stable
ALDH1A2	97.7213	48.9559	0.997189	0.0230713	0.205147	Stable
ALDH1A3	17.4476	63.6218	-1.8665	0.0154187	0.165904	Stable
ALDH1B1	56.7708	46.4638	0.289041	0.547578	0.821364	Stable
ALDH1L1	4.48699	0.962444	2.22097	0.221075	NA	Stable
ALDH1L2	1464.26	904.113	0.695593	0.0807017	0.386822	Stable
ALDH2	1126.59	1114.5	0.0155718	0.966067	0.993157	Stable
ALDH3A1	4.242	0.316521	3.74437	0.111345	NA	Stable
ALDH3B1	79.7216	43.4913	0.874242	0.214619	0.587214	Stable
ALDH4A1	134.941	276.959	-1.03735	0.0711562	0.363744	Stable
ALDH5A1	59.4094	87.1355	-0.552569	0.355906	0.712549	Stable
ALDH6A1	396.836	577.62	-0.541577	0.0683131	0.356807	Stable
ALDH7A1	2095.39	1758.98	0.252484	0.294386	0.667818	Stable
ALDH8A1	17.86	1.72291	3.37382	0.0180811	0.181542	Stable
ALDH9A1	4381.76	3432.53	0.352235	0.242525	0.621775	Stable
ALDOA	2360.03	3089.64	-0.388631	0.421435	0.756148	Stable
ALDOB	106.54	95.1865	0.162563	0.755916	0.919188	Stable
ALDOC	812.358	521.365	0.639823	0.0626128	0.342921	Stable
ALG1	76.7604	98.0559	-0.353243	0.424778	0.758	Stable
ALG10	1141.17	952.818	0.260243	0.168934	0.534132	Stable
ALG11	722.592	579.92	0.317326	0.179866	0.545473	Stable
ALG12	17.6886	56.0074	-1.6628	0.125264	0.474298	Stable
ALG13	679.745	438.847	0.631276	0.0187201	0.184012	Stable
ALG14	1319.71	1466.88	-0.152532	0.646254	0.86818	Stable
ALG3	390.561	440.816	-0.17463	0.592773	0.844103	Stable
ALG5	205.086	263.413	-0.361099	0.621326	0.855739	Stable
ALG6	302.612	211.617	0.516014	0.136802	0.492704	Stable
ALG8	7056.55	4822.21	0.54927	0.088701	0.402618	Stable
ALG9	372.557	263.062	0.502059	0.0717297	0.365266	Stable
ALK	515.731	395.509	0.382909	0.337183	0.700403	Stable
ALKAL1	66.0603	30.3456	1.1223	0.153748	0.51683	Stable
ALKAL2	14.3192	22.5006	-0.65201	0.356812	0.713696	Stable
ALKBH1	1408.91	1167.83	0.270754	0.398886	0.74254	Stable
ALKBH2	297.996	263.146	0.179431	0.611717	0.851535	Stable
ALKBH3	509.728	479.491	0.0882244	0.759924	0.92014	Stable
ALKBH4	52.5768	152.485	-1.53617	0.0167991	0.173401	Stable
ALKBH5	1210.96	956.67	0.340053	0.28799	0.66185	Stable
ALKBH7	406.218	492.723	-0.278523	0.437715	0.765953	Stable
ALKBH8	339.672	451.57	-0.410806	0.168017	0.533252	Stable
ALLC	4.27509	0.771891	2.46949	0.184485	NA	Stable
ALMS1	938.025	585.708	0.679445	0.00886987	0.121393	Stable
ALOX12	55.3329	65.1737	-0.236152	0.58814	0.841552	Stable
ALOX12B	12.4674	21.1171	-0.760253	0.408133	0.74764	Stable
ALOX15	35.6207	27.5517	0.370575	0.496253	0.796913	Stable
ALOX5	35.5914	21.9876	0.694838	0.178061	0.543481	Stable
ALOX5AP	4.11042	12.534	-1.60849	0.103317	0.433476	Stable
ALOXE3	38.763	17.1111	1.17975	0.0349874	0.256531	Stable
ALPK1	76.4824	22.8104	1.74543	0.0176309	0.178921	Stable
ALPK2	212.271	180.233	0.236043	0.560048	0.826846	Stable
ALPK3	9.14376	4.80193	0.929173	0.501737	0.799416	Stable
ALPL	64.5535	50.4567	0.35545	0.695849	0.892955	Stable
ALS2	491.778	382.819	0.361345	0.265202	0.641233	Stable
ALS2CL	1.54509	0.13642	3.50156	0.337242	NA	Stable
ALS2CR12	2.48269	5.50525	-1.1489	0.455897	NA	Stable
ALX1	433.725	357.209	0.280014	0.258435	0.63714	Stable
ALX3	0.798764	17.6543	-4.46611	0.378697	0.72975	Stable
ALX4	0.481351	11.4513	-4.57228	0.103319	0.433476	Stable
ALYREF	317.442	180.516	0.814361	0.0618501	0.34157	Stable
AMACR	159.796	192.739	-0.270412	0.641372	0.866402	Stable
AMBN	12.2283	13.604	-0.153806	0.899313	0.97189	Stable
AMBP	15.3728	16.3304	-0.0871843	0.926174	0.980086	Stable
AMBRA1	295.296	316.82	-0.101503	0.74542	0.914177	Stable
AMCF-II	8.04478	85.5427	-3.41052	0.16522	0.530958	Stable
AMD1	7261.47	4543.83	0.676352	0.00148091	0.0410574	Stable
AMDHD1	34.604	27.515	0.330719	0.661781	0.876736	Stable
AMELX	1.0613	0.441012	1.26694	0.816477	NA	Stable
AMER1	118.792	46.352	1.35773	0.0440502	0.288585	Stable
AMER2	19.3236	21.8357	-0.176323	0.839503	0.950404	Stable
AMER3	25.0261	27.2758	-0.124189	0.867969	0.961891	Stable
AMFR	2385.64	1973.05	0.273946	0.495301	0.796875	Stable
AMH	2.60335	2.60335	0	1	NA	Stable
AMHR2	8.50867	9.12907	-0.101534	0.943463	0.984871	Stable
AMIGO1	54.3378	57.1747	-0.0734201	0.903709	0.972882	Stable
AMIGO2	101.202	56.5365	0.839976	0.32013	0.687227	Stable
AMMECR1	438.646	332.041	0.401697	0.268978	0.644464	Stable
AMMECR1L	1146.57	807.4	0.505973	0.0276558	0.228048	Stable
AMN	2.28857	6.38985	-1.48133	0.484026	0.790068	Stable
AMN1	579.849	591.518	-0.0287455	0.941228	0.984171	Stable
AMOT	974.489	722.974	0.430702	0.147496	0.508545	Stable
AMOTL1	175.104	106.535	0.716881	0.388155	0.735533	Stable
AMOTL2	301.201	1375.68	-2.19135	0.0275994	0.227741	Stable
AMPD1	25.5977	13.9127	0.879612	0.232112	0.610262	Stable
AMPD2	110.517	90.9324	0.281398	0.508969	0.803074	Stable
AMPD3	882.999	659.321	0.421431	0.112723	0.451632	Stable
AMPH	34.055	58.8525	-0.78924	0.302069	0.674129	Stable
AMT	1281.81	3343.2	-1.38305	0.0124859	0.1475	Stable
AMTN	349.498	297.27	0.233509	0.826599	0.945492	Stable
AMY2	78.9913	27.8571	1.50365	0.00716658	0.106827	Stable
AMZ1	1.01592	2.76713	-1.4456	0.621821	NA	Stable
AMZ2	849.07	1096.91	-0.369484	0.0509149	0.311783	Stable
ANAPC1	912.036	600.974	0.601788	0.0274072	0.226814	Stable
ANAPC10	766.665	815.85	-0.0897078	0.767038	0.92281	Stable
ANAPC11	363.452	613.672	-0.7557	0.115536	0.457219	Stable
ANAPC13	387.082	344.866	0.166604	0.820331	0.942803	Stable
ANAPC15	1215.08	902.667	0.428791	0.135247	0.489706	Stable
ANAPC16	510.48	647.884	-0.343882	0.269045	0.644464	Stable
ANAPC2	78.2391	57.856	0.435423	0.576492	0.835762	Stable
ANAPC4	182.668	267.242	-0.548925	0.113078	0.452628	Stable
ANAPC5	248.051	219.193	0.178437	0.637779	0.86434	Stable
ANAPC7	3741.02	2922.76	0.356097	0.186572	0.553867	Stable
ANG	141.848	72.9939	0.958503	0.155126	0.518131	Stable
ANGEL1	176.059	203.656	-0.21008	0.665989	0.878206	Stable
ANGEL2	785.891	740.874	0.0851011	0.746289	0.914672	Stable
ANGPT1	289.047	153.267	0.915254	0.00298164	0.0641875	Stable
ANGPT2	183.369	105.826	0.79305	0.120562	0.467155	Stable
ANGPT4	1.28199	0.143571	3.15855	0.656618	NA	Stable
ANGPTL1	80.8622	141.326	-0.805487	0.0251055	0.214667	Stable
ANGPTL2	265.956	200.924	0.404542	0.305827	0.677305	Stable
ANGPTL3	3.89627	4.64776	-0.254441	0.882927	0.967196	Stable
ANGPTL4	17.3838	28.9532	-0.735985	0.43825	0.766156	Stable
ANGPTL5	4.80575	0.0897302	5.74302	0.0175114	NA	Stable
ANGPTL6	22.4174	19.156	0.226829	0.808638	0.939276	Stable
ANGPTL7	0.479089	0.479089	0	1	NA	Stable
ANGPTL8	0.286582	0.286582	0	1	NA	Stable
ANK1	5.88353	1.66175	1.82398	0.414123	NA	Stable
ANK2	879.393	672.916	0.386082	0.269061	0.644464	Stable
ANK3	314.354	260.988	0.268405	0.343709	0.705308	Stable
ANKAR	11.7316	35.4869	-1.59688	0.0113085	0.140567	Stable
ANKDD1A	22.3518	13.3467	0.743904	0.255361	0.634792	Stable
ANKDD1B	1960.62	1826.94	0.10188	0.793136	0.93407	Stable
ANKEF1	234.132	160.253	0.546964	0.325881	0.691308	Stable
ANKFN1	0.325494	2.62134	-3.0096	0.263737	NA	Stable
ANKFY1	867.253	1010.1	-0.21997	0.505686	0.801275	Stable
ANKH	183.05	109.497	0.741351	0.0325787	0.247094	Stable
ANKHD1	771.632	690.253	0.160789	0.584141	0.839801	Stable
ANKIB1	813.028	601.776	0.434079	0.0559476	0.328026	Stable
ANKLE1	4.00154	22.3858	-2.48396	0.0236518	0.208039	Stable
ANKLE2	1230.12	976.078	0.333731	0.118857	0.46326	Stable
ANKMY1	0.409726	2.07865	-2.34291	0.312532	NA	Stable
ANKMY2	2146.31	1887.58	0.185321	0.371191	0.724399	Stable
ANKRA2	628.565	429.382	0.549799	0.0220015	0.201379	Stable
ANKRD1	9.18465	89.3961	-3.28291	0.0150258	0.163417	Stable
ANKRD10	465.311	477.617	-0.0376594	0.915166	0.976236	Stable
ANKRD11	386.954	70.7636	2.45108	0.00897141	0.122349	Stable
ANKRD12	4702.15	4023.59	0.224837	0.385318	0.73364	Stable
ANKRD13A	782.319	689.614	0.181969	0.44169	0.767736	Stable
ANKRD13B	33.2315	26.5454	0.324091	0.694354	0.891968	Stable
ANKRD13C	596.736	549.372	0.119311	0.668281	0.879323	Stable
ANKRD13D	21.0949	8.85246	1.25274	0.492997	0.795829	Stable
ANKRD16	94.5173	112.034	-0.245289	0.604671	0.849505	Stable
ANKRD17	848.254	583.698	0.539275	0.0408681	0.278672	Stable
ANKRD22	38.189	12.9923	1.55551	0.247837	0.627478	Stable
ANKRD23	3.92616	15.3237	-1.96457	0.278136	0.65264	Stable
ANKRD24	10.2491	26.0431	-1.34541	0.107563	0.442134	Stable
ANKRD27	339.142	350.252	-0.0465019	0.860734	0.959591	Stable
ANKRD28	757.074	539.292	0.489368	0.0250639	0.214667	Stable
ANKRD31	688.711	396.277	0.797389	0.0419207	0.282456	Stable
ANKRD33	3.51325	0.0900901	5.28529	0.101025	NA	Stable
ANKRD33B	390.585	312.879	0.320031	0.499715	0.798306	Stable
ANKRD34A	3.39212	10.8933	-1.68318	0.0908823	0.408944	Stable
ANKRD34B	6.97539	11.6055	-0.734465	0.557717	0.825939	Stable
ANKRD34C	18.803	20.655	-0.135529	0.852016	0.955846	Stable
ANKRD35	9.57215	12.2731	-0.358582	0.767158	0.922893	Stable
ANKRD37	997.242	1045.82	-0.0686211	0.817679	0.941653	Stable
ANKRD39	65.821	140.116	-1.09	0.095995	0.419952	Stable
ANKRD40	551.84	430.608	0.357877	0.171152	0.536741	Stable
ANKRD42	1023.85	787.202	0.379203	0.0897241	0.405739	Stable
ANKRD44	604.742	419.222	0.528606	0.0492249	0.306134	Stable
ANKRD46	1172.67	1392.67	-0.248054	0.350327	0.709989	Stable
ANKRD49	735.941	635.083	0.212644	0.235177	0.61378	Stable
ANKRD50	1884.49	1125.89	0.743115	0.000157452	0.0086905	Stable
ANKRD52	240.177	192.835	0.316733	0.368744	0.721976	Stable
ANKRD53	7.26161	4.20378	0.788601	0.659849	0.875638	Stable
ANKRD54	49.8156	63.1211	-0.341524	0.426927	0.759177	Stable
ANKRD55	26.4703	3.4755	2.92908	0.0194019	0.187555	Stable
ANKRD6	856.927	625.97	0.453078	0.0851074	0.396224	Stable
ANKRD60	0.12525	0.12525	0	1	NA	Stable
ANKRD61	0.544961	4.46056	-3.033	0.0655844	NA	Stable
ANKRD63	10.3869	36.4929	-1.81285	0.085515	0.396913	Stable
ANKRD65	0.311692	2.78985	-3.162	0.246206	NA	Stable
ANKRD66	2.21316	4.60889	-1.05831	0.670506	NA	Stable
ANKRD7	0.587141	12.1598	-4.37227	0.0771186	0.377705	Stable
ANKRD9	9.0618	17.0859	-0.914932	0.52975	0.813282	Stable
ANKS1A	108.298	98.4882	0.136981	0.783999	0.930922	Stable
ANKS1B	2446.04	2188.9	0.160241	0.647914	0.869524	Stable
ANKS3	49.5732	36.2373	0.452083	0.570157	0.832801	Stable
ANKS4B	729.059	860.536	-0.2392	0.539073	0.817262	Stable
ANKS6	50.4932	65.8064	-0.382138	0.593024	0.844103	Stable
ANKUB1	3.25396	3.05282	0.0920519	0.959972	NA	Stable
ANKZF1	108.029	146.139	-0.435923	0.342455	0.704636	Stable
ANLN	1830.72	1299.55	0.494394	0.0509891	0.312027	Stable
ANO1	57.9777	94.2822	-0.701488	0.178964	0.54475	Stable
ANO10	475.047	500.465	-0.0751992	0.828952	0.946167	Stable
ANO2	2.51579	11.4762	-2.18956	0.0922794	0.411396	Stable
ANO3	22.4795	25.8757	-0.202988	0.801165	0.937113	Stable
ANO4	771.66	627.628	0.298057	0.333228	0.69734	Stable
ANO5	139.874	117.588	0.250378	0.555217	0.824723	Stable
ANO6	1409.13	1157.74	0.283491	0.124749	0.473681	Stable
ANO7	12.1845	9.67285	0.333032	0.771531	0.925185	Stable
ANO8	73.9858	53.2727	0.473852	0.598799	0.846465	Stable
ANO9	0.954641	1.37476	-0.526153	0.848532	NA	Stable
ANOS1	29.9329	21.62	0.469368	0.450355	0.772975	Stable
ANP32A	241.618	215.515	0.164939	0.592406	0.844096	Stable
ANP32B	7584.59	5883.19	0.366472	0.157921	0.521504	Stable
ANPEP	174.275	251.381	-0.52851	0.747573	0.914897	Stable
ANTXR2	408.16	260.405	0.648379	0.323857	0.690171	Stable
ANTXRL	0.440775	3.92002	-3.15275	0.292346	NA	Stable
ANXA1	1842.76	3189.89	-0.791643	0.235621	0.614172	Stable
ANXA10	3.84437	1.81488	1.08287	0.45557	NA	Stable
ANXA11	528.036	467.442	0.175847	0.456418	0.776135	Stable
ANXA13	8.93884	3.7431	1.25585	0.486975	0.79183	Stable
ANXA2	5003.04	5618.03	-0.167259	0.710124	0.899587	Stable
ANXA2R	2.29202	4.3225	-0.915245	0.623094	NA	Stable
ANXA3	18.4146	3.42892	2.42502	0.0823245	0.390612	Stable
ANXA4	327.845	718.524	-1.13202	0.288029	0.661864	Stable
ANXA5	2220.72	2047.63	0.11707	0.521658	0.809016	Stable
ANXA6	824.667	1486.93	-0.850453	0.148849	0.509732	Stable
ANXA7	1403.89	1237.92	0.181504	0.630658	0.860657	Stable
ANXA8	72.5003	72.5003	0	1	1	Stable
ANXA9	456.679	376.91	0.276962	0.194837	0.563706	Stable
AOAH	84.3498	62.5008	0.432508	0.456195	0.776135	Stable
AOC1	0.40744	7.55688	-4.21313	0.16751	NA	Stable
AOC2	11.4852	15.8444	-0.464205	0.701448	0.896283	Stable
AOX1	165.074	46.7361	1.8205	0.0541807	0.322675	Stable
AOX2	204.15	162.723	0.327212	0.422411	0.756903	Stable
AOX4	0.199955	3.68824	-4.20518	0.0845245	NA	Stable
AP1AR	527.175	551.198	-0.0642894	0.840127	0.950644	Stable
AP1B1	788.05	684.754	0.202702	0.3405	0.703006	Stable
AP1G1	633.878	725.551	-0.194873	0.507975	0.802533	Stable
AP1G2	239.335	188.088	0.347619	0.307932	0.678808	Stable
AP1M1	247.491	229.512	0.108806	0.75575	0.919187	Stable
AP1M2	259.018	477.491	-0.882422	0.0300085	0.237434	Stable
AP1S1	646.07	847.811	-0.392051	0.120067	0.465874	Stable
AP1S2	1498.15	1097.18	0.449385	0.0283417	0.230878	Stable
AP1S3	37.5288	25.6017	0.55176	0.541035	0.818177	Stable
AP2A1	158.01	251.04	-0.667899	0.426357	0.759094	Stable
AP2A2	169.162	279.603	-0.724971	0.271383	0.646244	Stable
AP2B1	2940.22	2386.71	0.300899	0.141179	0.49973	Stable
AP2M1	20692.3	15301.2	0.435452	0.0853026	0.396575	Stable
AP2S1	416.596	621.74	-0.57766	0.0464866	0.297945	Stable
AP3B1	913.648	701.988	0.380191	0.0580011	0.332494	Stable
AP3B2	229.791	160.392	0.518716	0.298973	0.672165	Stable
AP3D1	1058.28	920.38	0.201417	0.303179	0.675203	Stable
AP3M1	2497.75	1884.06	0.406783	0.110396	0.44699	Stable
AP3M2	34.0279	33.7936	0.00996691	0.988414	1	Stable
AP3S1	2878.94	2865.48	0.00675823	0.974518	0.996367	Stable
AP4B1	145.254	245.232	-0.755572	0.026639	0.222683	Stable
AP4E1	286.324	201.593	0.506207	0.0639185	0.34508	Stable
AP4M1	59.6952	81.3076	-0.445775	0.34327	0.704951	Stable
AP4S1	382.343	562.106	-0.555972	0.0475798	0.301415	Stable
AP5M1	931.864	794.887	0.22937	0.267959	0.643853	Stable
AP5S1	79.8457	111.715	-0.484532	0.39563	0.7403	Stable
AP5Z1	96.29	145.483	-0.595396	0.379265	0.730233	Stable
APAF1	442.264	315.767	0.486048	0.0420745	0.282726	Stable
APBA1	620.884	490.795	0.339205	0.291063	0.664965	Stable
APBA2	14.5675	11.6272	0.325242	0.704245	0.897298	Stable
APBB1	121.516	6.49976	4.22462	0.0139438	0.156977	Stable
APBB1IP	11.669	16.39	-0.49013	0.555294	0.824723	Stable
APBB2	542.146	453.769	0.256723	0.414514	0.75174	Stable
APC	600.932	557.693	0.10773	0.740297	0.912116	Stable
APC2	22.299	14.5157	0.619366	0.550847	0.822803	Stable
APCDD1	13.6531	4.27905	1.67386	0.250034	0.629209	Stable
APCDD1L	0.101791	0.481573	-2.24214	0.752602	NA	Stable
APCS	1.10986	3.2867	-1.56626	0.308309	NA	Stable
APEH	83.515	226.186	-1.4374	0.00337852	0.0684206	Stable
APELA	251.466	118.486	1.08564	0.110539	0.447061	Stable
APEX2	1035.8	756.03	0.454223	0.082589	0.391189	Stable
APH1A	1563.75	1341.51	0.22115	0.594935	0.8454	Stable
APH1B	2226.21	1491.96	0.577378	0.101946	0.430535	Stable
API5	2829.6	1760.29	0.684789	0.00755247	0.110219	Stable
APIP	594.395	665.393	-0.162785	0.610286	0.851279	Stable
APITD1	1088.69	929.235	0.228477	0.562185	0.828209	Stable
APLF	622.813	631.934	-0.0209756	0.941073	0.984112	Stable
APLN	8.29662	4.05241	1.03374	0.598113	0.846442	Stable
APLNR	0.266533	0.266533	0	1	NA	Stable
APLP1	130.392	163.021	-0.322195	0.655169	0.873205	Stable
APLP2	985.082	1035.57	-0.0721062	0.79334	0.934222	Stable
APMAP	299.549	306.319	-0.0322421	0.912401	0.975066	Stable
APOA2	219.918	219.918	0	1	1	Stable
APOA4	7.75546	10.8257	-0.48118	0.728297	0.907119	Stable
APOA5	4.01106	0.0599731	6.06353	0.391257	NA	Stable
APOB	26.0202	42.0317	-0.691848	0.319368	0.687226	Stable
APOBEC1	58.2521	13.0385	2.15953	0.335627	0.698727	Stable
APOBEC2	650.957	698.396	-0.101484	0.695758	0.892896	Stable
APOBEC3B	25.3244	15.8938	0.672061	0.617437	0.85369	Stable
APOBEC4	11.6135	8.27135	0.489608	0.696062	0.893113	Stable
APOBR	6.96	22.2125	-1.67421	0.306914	0.677823	Stable
APOC2	0.264211	0.0630267	2.06765	0.772314	NA	Stable
APOC3	0.880677	1.02365	-0.217033	0.974267	NA	Stable
APOC4	0.0305201	1.12954	-5.20983	0.461404	NA	Stable
APOE	16.1351	30.7054	-0.928287	0.306555	0.67771	Stable
APOF	119.559	124.119	-0.0539972	0.920138	0.977838	Stable
APOH	1.72049	0.0969358	4.14964	0.483115	NA	Stable
APOLD1	4.0926	8.41204	-1.03944	0.477266	0.78688	Stable
APOM	29.4661	16.2033	0.862768	0.161527	0.526035	Stable
APOO	902.156	1085.26	-0.266596	0.383662	0.732875	Stable
APOOL	668.443	1019.08	-0.608396	0.164571	0.530256	Stable
APP	1760.93	2436.93	-0.468728	0.294711	0.667945	Stable
APPBP2	1085.07	962.798	0.172485	0.191812	0.561651	Stable
APPL1	521.869	393.776	0.406312	0.0579585	0.332443	Stable
APPL2	1483.6	1212.63	0.290971	0.288499	0.66223	Stable
APTX	383.348	418.111	-0.125229	0.67032	0.880572	Stable
AQN-1	0.174388	0.174388	0	1	NA	Stable
AQP1	10.8955	17.1757	-0.65663	0.855129	0.956909	Stable
AQP10	19.078	8.49513	1.16721	0.279923	0.654438	Stable
AQP11	23.9471	22.4913	0.0904862	0.918242	0.977179	Stable
AQP2	10.0012	11.734	-0.230527	0.86297	0.960478	Stable
AQP3	1160.22	1395.76	-0.266657	0.799347	0.936665	Stable
AQP4	0.881148	0.881148	0	1	NA	Stable
AQP5	0.582399	0.172815	1.75278	0.722294	NA	Stable
AQP6	95.4708	60.315	0.662543	0.142708	0.501725	Stable
AQP7	1.70389	7.95672	-2.22334	0.0927255	0.412736	Stable
AQP8	1.16424	3.12884	-1.42625	0.732135	NA	Stable
AQP9	72.2662	29.7057	1.28258	0.277763	0.652527	Stable
AQR	409.785	354.111	0.210663	0.401366	0.743377	Stable
AR	71.6859	44.6618	0.682647	0.714335	0.900857	Stable
ARAF	167.1	209.048	-0.323126	0.409345	0.748238	Stable
ARAP1	200.721	139.608	0.523808	0.404361	0.745823	Stable
ARAP2	755.778	528.567	0.515875	0.0300735	0.237557	Stable
ARAP3	52.6056	95.6208	-0.862107	0.135279	0.489706	Stable
ARC	0.445605	3.55779	-2.99714	0.537613	NA	Stable
ARCN1	2836.44	2784.81	0.0265029	0.901862	0.972409	Stable
AREG	47.3183	41.3103	0.195899	0.792483	0.933694	Stable
AREL1	321.405	284.783	0.174529	0.621427	0.85581	Stable
ARF1	7648.74	7024.42	0.122842	0.613023	0.852165	Stable
ARF2	128.233	270.64	-1.0776	0.00494046	0.0869086	Stable
ARF3	1700.85	1465.62	0.214746	0.32037	0.687299	Stable
ARF4	13529.9	12851.6	0.0742049	0.744179	0.913444	Stable
ARF5	137.593	172.093	-0.322777	0.475061	0.786249	Stable
ARF6	1707.56	1847.81	-0.113886	0.609672	0.851229	Stable
ARFGAP1	177.453	118.811	0.57877	0.400621	0.743377	Stable
ARFGAP2	629.189	662.999	-0.0755136	0.773383	0.925897	Stable
ARFGAP3	402.808	377.334	0.094251	0.805424	0.938418	Stable
ARFGEF1	727.633	642.282	0.180005	0.447127	0.770681	Stable
ARFGEF2	596.437	441.676	0.433382	0.135137	0.489692	Stable
ARFGEF3	342.29	233.623	0.551038	0.366405	0.719983	Stable
ARFIP1	3362.48	2900.06	0.213444	0.385377	0.73364	Stable
ARFRP1	73.1194	107.429	-0.555063	0.508691	0.803074	Stable
ARG1	552.017	3763.04	-2.76911	0.0883314	0.402191	Stable
ARG2	471.179	316.769	0.572846	0.134193	0.488403	Stable
ARGFX	1287.25	813.952	0.661272	0.462949	0.778969	Stable
ARGLU1	1412.47	1573.05	-0.15535	0.695018	0.892252	Stable
ARHGAP1	1696.47	1217.81	0.478245	0.0221211	0.20209	Stable
ARHGAP10	512.482	517.741	-0.0147299	0.960978	0.991442	Stable
ARHGAP11A	2692.73	2298.96	0.228083	0.396504	0.740743	Stable
ARHGAP12	1140.31	804.966	0.502429	0.129814	0.48158	Stable
ARHGAP15	31.1213	15.4445	1.01081	0.0953706	0.41851	Stable
ARHGAP17	103.639	151.219	-0.545066	0.183263	0.549816	Stable
ARHGAP18	19550.9	12701.3	0.622262	0.0074525	0.109366	Stable
ARHGAP20	30.0626	31.4324	-0.0642827	0.937969	0.983148	Stable
ARHGAP21	1682.52	1407.57	0.257421	0.287743	0.661795	Stable
ARHGAP22	828.319	717.644	0.206916	0.715014	0.900966	Stable
ARHGAP23	19.8655	229.553	-3.53049	0.0170708	0.175024	Stable
ARHGAP24	63.759	51.3629	0.311901	0.611734	0.851535	Stable
ARHGAP25	8.64476	39.7159	-2.19982	0.0118789	0.143746	Stable
ARHGAP26	201.113	149.151	0.431229	0.109213	0.445066	Stable
ARHGAP27	152.802	204.057	-0.417305	0.221493	0.596351	Stable
ARHGAP28	128.132	71.2408	0.846849	0.16811	0.533252	Stable
ARHGAP29	1617.87	1651.91	-0.0300452	0.90808	0.973906	Stable
ARHGAP30	5.70322	4.3432	0.39302	0.800721	0.937113	Stable
ARHGAP31	250.398	303.052	-0.27534	0.585153	0.840271	Stable
ARHGAP32	248.074	156.738	0.662417	0.061169	0.340106	Stable
ARHGAP33	15.1485	24.6466	-0.702213	0.532936	0.814625	Stable
ARHGAP35	772.806	585.671	0.400016	0.199828	0.570077	Stable
ARHGAP36	13.2024	63.6641	-2.26968	0.00252126	0.0577826	Stable
ARHGAP39	4.41676	36.6689	-3.0535	0.025769	0.218257	Stable
ARHGAP4	0.901111	0.374447	1.26694	0.805334	NA	Stable
ARHGAP42	2194.6	1558.75	0.493573	0.0723454	0.367105	Stable
ARHGAP44	27.8381	32.6523	-0.230124	0.704721	0.897674	Stable
ARHGAP45	1.2021	2.85105	-1.24594	0.669516	NA	Stable
ARHGAP5	1164.29	985.627	0.240341	0.316649	0.684993	Stable
ARHGAP6	48.6337	21.685	1.16526	0.150992	0.513295	Stable
ARHGAP8	76.7674	137.717	-0.843145	0.306105	0.677489	Stable
ARHGAP9	276.545	187.329	0.561941	0.123843	0.472133	Stable
ARHGDIA	460.274	617.92	-0.424927	0.311571	0.680932	Stable
ARHGDIB	4.62813	38.5031	-3.05647	0.00771668	0.111513	Stable
ARHGDIG	1.16299	6.92324	-2.57361	0.191911	NA	Stable
ARHGEF1	75.6501	106.745	-0.496757	0.406488	0.74698	Stable
ARHGEF10	147.802	85.7231	0.785912	0.251388	0.63101	Stable
ARHGEF10L	116.698	109.636	0.0900519	0.910177	0.974576	Stable
ARHGEF11	487.741	346.84	0.491845	0.17348	0.539474	Stable
ARHGEF12	287.688	278.832	0.0451119	0.892168	0.96972	Stable
ARHGEF15	3.84762	2.39636	0.683121	0.699706	NA	Stable
ARHGEF16	0.782075	23.2726	-4.89518	0.00457375	0.0826937	Stable
ARHGEF17	74.0758	269.979	-1.86577	0.0971377	0.422255	Stable
ARHGEF2	628.691	562.308	0.160989	0.828044	0.946078	Stable
ARHGEF25	144.573	127.925	0.176497	0.755096	0.919067	Stable
ARHGEF26	637.685	519.149	0.296695	0.409958	0.748976	Stable
ARHGEF28	147.617	81.9066	0.849804	0.204803	0.576254	Stable
ARHGEF3	98.5949	90.0815	0.130282	0.727015	0.906322	Stable
ARHGEF33	108.925	91.6726	0.248775	0.572753	0.833683	Stable
ARHGEF37	13.4569	39.4894	-1.55312	0.00985524	0.129007	Stable
ARHGEF38	138.892	110.411	0.331082	0.501235	0.799001	Stable
ARHGEF39	185.078	131.025	0.498283	0.214243	0.586872	Stable
ARHGEF4	2670.32	1710.71	0.642415	0.0747865	0.372433	Stable
ARHGEF40	60.2096	154.487	-1.35942	0.147996	0.508841	Stable
ARHGEF5	134.725	89.5705	0.588926	0.430267	0.761708	Stable
ARHGEF6	172.84	101.114	0.773457	0.236834	0.61539	Stable
ARHGEF7	194.421	345.533	-0.829643	0.0223341	0.202895	Stable
ARHGEF9	45.447	53.7522	-0.242138	0.774541	0.92639	Stable
ARID1A	1519.37	1023.16	0.57044	0.0317715	0.243555	Stable
ARID1B	446.079	332.157	0.425434	0.0916051	0.41021	Stable
ARID2	1628.67	1301.45	0.323579	0.148866	0.509732	Stable
ARID3A	25.0364	82.8058	-1.7257	0.0381182	0.269444	Stable
ARID3B	362.816	326.765	0.150981	0.589557	0.84241	Stable
ARID3C	348.725	611.11	-0.809343	0.0180372	0.181285	Stable
ARID4A	13156	10232.1	0.362617	0.145671	0.505939	Stable
ARID4B	1315.46	1133.94	0.214216	0.227657	0.604779	Stable
ARID5A	21.0684	58.6868	-1.47795	0.0630008	0.343531	Stable
ARID5B	638.089	886.597	-0.47452	0.230335	0.607885	Stable
ARIH1	1584.6	1146.29	0.467147	0.0901245	0.406717	Stable
ARIH2	806.374	811.438	-0.00903265	0.974604	0.996367	Stable
ARIH2OS	36.9261	46.0659	-0.319058	0.651444	0.871604	Stable
ARL1	2898.66	2598.3	0.15782	0.596413	0.845691	Stable
ARL10	560.865	458.831	0.28969	0.335	0.698334	Stable
ARL11	2.59789	0.180525	3.84707	0.331467	NA	Stable
ARL13A	1.1195	1.76477	-0.65663	0.85163	NA	Stable
ARL13B	585.891	517.64	0.178684	0.580865	0.838541	Stable
ARL14EP	3319.84	2705.13	0.295414	0.19195	0.561679	Stable
ARL14EPL	13301	9754.63	0.447371	0.282397	0.657494	Stable
ARL15	5494.92	4303.96	0.352432	0.17095	0.536446	Stable
ARL16	140.485	167.924	-0.257398	0.683923	0.8867	Stable
ARL2	226.11	405.319	-0.842035	0.0114168	0.141105	Stable
ARL2BP	801.468	664.35	0.270703	0.284098	0.658753	Stable
ARL3	67.0553	149.086	-1.15272	0.017784	0.179889	Stable
ARL4A	4458.52	4369.98	0.0289392	0.907851	0.973818	Stable
ARL4C	130.154	341.523	-1.39177	0.0119479	0.144057	Stable
ARL4D	734.086	850.482	-0.212332	0.526733	0.811733	Stable
ARL5A	962.491	789.494	0.285845	0.241976	0.621599	Stable
ARL5B	1478.4	1021.45	0.533424	0.0670818	0.35431	Stable
ARL6	1372.93	945.355	0.53833	0.0500608	0.30882	Stable
ARL6IP1	4188.79	3050.49	0.457494	0.0891512	0.404252	Stable
ARL6IP4	1090.22	871.766	0.322605	0.386119	0.73411	Stable
ARL6IP6	2505.63	2581.1	-0.0428164	0.824916	0.944917	Stable
ARL8A	10.0911	91.4295	-3.17957	0.00328667	0.0675768	Stable
ARL8B	3905.19	3268.37	0.256819	0.221159	0.595796	Stable
ARL9	53.6641	32.9296	0.704571	0.272622	0.647006	Stable
ARMC1	29633.1	22711.8	0.38377	0.0986046	0.425189	Stable
ARMC10	870.234	803.113	0.1158	0.666677	0.878348	Stable
ARMC12	174.92	143.256	0.288106	0.524588	0.810815	Stable
ARMC2	2209.45	1743.09	0.342045	0.198431	0.568211	Stable
ARMC3	12.1406	9.82637	0.305108	0.806541	0.938917	Stable
ARMC4	147.266	100.159	0.556136	0.14599	0.506339	Stable
ARMC5	11.7281	21.7991	-0.894304	0.374183	0.726377	Stable
ARMC6	84.4211	163.026	-0.949424	0.0690806	0.35867	Stable
ARMC7	1094.15	1371.63	-0.326084	0.298518	0.671499	Stable
ARMC8	2811.35	2545.71	0.143192	0.555935	0.82513	Stable
ARMC9	119.12	145.93	-0.292851	0.322088	0.688477	Stable
ARMCX1	69.4634	139.973	-1.01082	0.0241485	0.210944	Stable
ARMCX3	33.6334	153.442	-2.18972	0.360181	0.716246	Stable
ARMCX4	66.4611	109.999	-0.726908	0.222041	0.596994	Stable
ARMCX5	305.861	219.328	0.479786	0.134736	0.488751	Stable
ARMT1	860.12	884.93	-0.0410248	0.897948	0.971335	Stable
ARNT	242.249	275.455	-0.18533	0.653324	0.872635	Stable
ARNT2	235.398	106.994	1.13757	0.350375	0.709989	Stable
ARNTL	300.44	222.08	0.435995	0.116374	0.458825	Stable
ARNTL2	1347.58	1126.76	0.258198	0.499155	0.79821	Stable
ARPC1A	1854.39	1973.33	-0.0896853	0.733148	0.909971	Stable
ARPC1B	893.577	777.424	0.20089	0.495814	0.796875	Stable
ARPC2	5492.21	5577.19	-0.0221512	0.927801	0.981128	Stable
ARPC3	1691.02	2768.99	-0.711461	0.0286043	0.231548	Stable
ARPC4	2069.83	2021.04	0.0344173	0.881007	0.966646	Stable
ARPC5	463.634	566.578	-0.289289	0.424606	0.757966	Stable
ARPC5L	455.89	513.26	-0.171004	0.582633	0.839211	Stable
ARPIN	248.62	241.221	0.0435883	0.933435	0.982381	Stable
ARPP19	7318.74	9082.78	-0.311538	0.192837	0.561745	Stable
ARPP21	670.69	529.077	0.34217	0.455518	0.776135	Stable
ARR3	64.7936	36.1135	0.843313	0.0501587	0.308864	Stable
ARRB1	93.7697	63.5309	0.561665	0.527514	0.812147	Stable
ARRDC1	76.645	97.4689	-0.346751	0.479249	0.787705	Stable
ARRDC2	437.142	173.215	1.33553	0.00330136	0.067673	Stable
ARRDC3	239.043	140.515	0.76655	0.125752	0.47505	Stable
ARRDC4	150.645	141.049	0.0949536	0.793904	0.934233	Stable
ARRDC5	0.760408	1.61675	-1.08825	0.773964	NA	Stable
ARSA	37.5344	164.413	-2.13103	0.00485379	0.0858814	Stable
ARSB	140.852	154.072	-0.129427	0.745582	0.914258	Stable
ARSE	21.3882	22.0897	-0.046558	0.961603	0.991699	Stable
ARSG	7.19041	22.5727	-1.65043	0.206062	0.577164	Stable
ARSJ	875.769	553.44	0.662125	0.0598317	0.33631	Stable
ARSK	153.031	121.498	0.332891	0.524197	0.810631	Stable
ART1	1.05181	0.0810825	3.69734	0.60218	NA	Stable
ART3	2372.25	1771.73	0.421096	0.175819	0.541387	Stable
ART4	0.0922176	0.781011	-3.08223	0.663896	NA	Stable
ART5	1.34512	0.558954	1.26694	0.831141	NA	Stable
ARTN	2.10005	11.3468	-2.43379	0.35407	0.711705	Stable
ARV1	722.044	841.685	-0.221192	0.387922	0.735287	Stable
ARVCF	67.3759	89.5512	-0.41048	0.602168	0.848226	Stable
ARX	6.86485	0.147821	5.5373	0.0134534	NA	Stable
AS3MT	46.1951	49.851	-0.109883	0.898436	0.971472	Stable
ASAH1	1744.22	1329.32	0.391894	0.282328	0.657432	Stable
ASAH2	584.535	369.86	0.66031	0.123782	0.471991	Stable
ASAP1	10006	7265.91	0.461646	0.0167419	0.17299	Stable
ASAP2	420.382	363.486	0.209801	0.4151	0.751819	Stable
ASAP3	53.32	72.1991	-0.437303	0.610464	0.851279	Stable
ASB10	8.60388	0.860563	3.32164	0.201545	0.5721	Stable
ASB11	2007.09	1406.37	0.513131	0.102518	0.431943	Stable
ASB12	0.217155	1.63393	-2.91155	0.681591	NA	Stable
ASB13	12.3413	73.8196	-2.58051	0.0185763	0.183335	Stable
ASB14	473.713	366.405	0.370575	0.109903	0.446304	Stable
ASB15	5.46525	6.80001	-0.315249	0.795997	0.935046	Stable
ASB16	11.8908	5.34919	1.15245	0.236089	0.614394	Stable
ASB17	0.322376	0.322376	0	1	NA	Stable
ASB18	7.0979	11.9504	-0.751596	0.547941	0.821457	Stable
ASB2	12.2823	26.9567	-1.13406	0.370141	0.723105	Stable
ASB3	1075.77	1107.52	-0.0419607	0.847781	0.953819	Stable
ASB4	1503.09	1029.08	0.54658	0.119129	0.464047	Stable
ASB5	1.13809	10.4076	-3.19296	0.0537245	0.321248	Stable
ASB6	115.015	146.889	-0.352904	0.41461	0.75174	Stable
ASB7	257.322	231.563	0.152168	0.493173	0.795965	Stable
ASB8	669.762	595.718	0.169019	0.49968	0.798306	Stable
ASB9	15.4794	8.15996	0.923716	0.474999	0.786249	Stable
ASCC1	317.529	341.427	-0.104688	0.786837	0.931839	Stable
ASCC2	250.195	384.415	-0.619609	0.0479979	0.302576	Stable
ASCC3	1042.48	905.525	0.203195	0.1592	0.523464	Stable
ASCL1	21.8318	48.951	-1.16491	0.165816	0.531351	Stable
ASCL2	0.171795	0.171795	0	1	NA	Stable
ASCL3	1.09971	1.09971	0	1	NA	Stable
ASCL4	0.0504792	0.615811	-3.60873	0.610523	NA	Stable
ASCL5	0.0263733	0.0263733	0	1	NA	Stable
ASF1A	1659.9	1924.92	-0.213699	0.411545	0.750342	Stable
ASF1B	4079.33	3531.91	0.207884	0.506953	0.802182	Stable
ASGR1	3.82511	2.021	0.920431	0.615076	NA	Stable
ASGR2	77.9797	59.0278	0.401703	0.480941	0.788343	Stable
ASH1L	803.585	659.2	0.285735	0.325128	0.690941	Stable
ASH2L	4240.32	3428.1	0.306766	0.234872	0.613294	Stable
ASIC1	12.9117	23.2015	-0.845544	0.256838	0.636271	Stable
ASIC2	5.16527	0.348811	3.88833	0.0695252	NA	Stable
ASIC3	91.319	73.0502	0.322027	0.586511	0.840709	Stable
ASIC4	2.30469	1.5126	0.607545	0.696526	NA	Stable
ASIC5	0.270606	0.270606	0	1	NA	Stable
ASIP	117.168	45.5125	1.36424	0.17169	0.53741	Stable
ASL	107.868	262.407	-1.28255	0.0896766	0.405617	Stable
ASMTL	23.7592	34.1	-0.521286	0.583086	0.839317	Stable
ASNA1	469.248	506.201	-0.10936	0.801019	0.937113	Stable
ASNS	5838.73	4412.81	0.403957	0.10373	0.434673	Stable
ASNSD1	969.03	2290.39	-1.24098	0.00439467	0.0808584	Stable
ASPA	62.6913	68.8059	-0.134268	0.824819	0.944892	Stable
ASPDH	22.2801	9.42969	1.24048	0.170379	0.535607	Stable
ASPG	111.424	111.424	0	1	1	Stable
ASPH	166.419	294.124	-0.8216	0.108285	0.443632	Stable
ASPHD1	0.23321	0.944328	-2.01766	0.732427	NA	Stable
ASPHD2	1082.87	796.241	0.44359	0.227961	0.604936	Stable
ASPM	2307.12	1888.31	0.288996	0.229227	0.606571	Stable
ASPN	3042.09	1924.02	0.660944	0.18196	0.548029	Stable
ASPRV1	2532.77	2242.77	0.175431	0.580861	0.838541	Stable
ASPSCR1	57.1845	82.5816	-0.530196	0.567059	0.830877	Stable
ASS1	433.977	925.161	-1.09209	0.439807	0.766885	Stable
ASTE1	96.3274	80.2397	0.263631	0.485222	0.790924	Stable
ASTL	615.034	442.44	0.475182	0.0880918	0.401712	Stable
ASTN1	9712.61	7838.33	0.309313	0.45264	0.774823	Stable
ASTN2	1629.47	1101.8	0.56454	0.192897	0.56181	Stable
ASXL1	344.536	336.54	0.0338761	0.940012	0.983789	Stable
ASXL2	414.415	523.146	-0.336139	0.310411	0.680231	Stable
ASXL3	110.591	108.905	0.0221634	0.954133	0.9891	Stable
ASZ1	388.673	400.931	-0.0447979	0.936462	0.983148	Stable
ATAD1	2781.86	3008.17	-0.112839	0.623122	0.856789	Stable
ATAD2	1035.96	903.579	0.197251	0.35523	0.712252	Stable
ATAD2B	595.977	320.888	0.893189	0.0220872	0.201874	Stable
ATAD5	1520.76	1131.81	0.42616	0.12085	0.467539	Stable
ATAT1	40.3148	68.6145	-0.767204	0.212686	0.584604	Stable
ATCAY	7.31528	7.47035	-0.0302631	0.983698	1	Stable
ATE1	1148.22	1132.53	0.0198443	0.940657	0.983995	Stable
ATF1	1118.87	774.247	0.53117	0.0977633	0.4234	Stable
ATF2	416.292	331.629	0.328025	0.326895	0.692613	Stable
ATF4	2999.3	2341.38	0.357268	0.168329	0.533361	Stable
ATF5	168.527	239.948	-0.509747	0.366236	0.719864	Stable
ATF6	2416.86	1534.38	0.655484	0.00447088	0.081703	Stable
ATF6B	183.446	338.706	-0.884679	0.0110437	0.138186	Stable
ATF7	2762.23	2003.17	0.463546	0.0667279	0.353286	Stable
ATF7IP	920.04	614.269	0.582826	0.0760878	0.375805	Stable
ATF7IP2	491.445	647.601	-0.398075	0.145813	0.506078	Stable
ATG10	50.9391	51.7757	-0.0235016	0.968808	0.994278	Stable
ATG101	731.301	769.076	-0.0726599	0.844318	0.952147	Stable
ATG12	1470.93	1320.26	0.155908	0.485122	0.790825	Stable
ATG13	633.021	535.027	0.242644	0.290355	0.663983	Stable
ATG14	1049.27	739.948	0.503889	0.0253538	0.216122	Stable
ATG16L1	1115	800.416	0.478222	0.0512936	0.313312	Stable
ATG2A	49.5094	142.074	-1.52086	0.0380654	0.269263	Stable
ATG2B	1161.93	818.318	0.505787	0.0571056	0.33022	Stable
ATG3	723.605	1040.54	-0.524052	0.0534914	0.320422	Stable
ATG4A	7725.48	6096.2	0.341714	0.249888	0.629165	Stable
ATG4B	349.653	556.595	-0.670705	0.110521	0.447061	Stable
ATG4C	207.469	176.342	0.234525	0.625722	0.858021	Stable
ATG5	1199.49	1503.57	-0.325965	0.104331	0.436354	Stable
ATG7	1337.37	1069.15	0.322929	0.173534	0.539474	Stable
ATG9A	147.774	228.754	-0.63041	0.227708	0.604779	Stable
ATG9B	53.0975	122.713	-1.20858	0.184101	0.551348	Stable
ATIC	1900.28	3195.71	-0.749924	0.0328888	0.248302	Stable
ATL1	579.016	506.477	0.193107	0.560456	0.826868	Stable
ATL2	8231.82	6160.75	0.418105	0.110947	0.447897	Stable
ATL3	4470.09	3226.93	0.470144	0.0631911	0.343945	Stable
ATM	1307	1133.62	0.205323	0.23936	0.618234	Stable
ATMIN	464.22	432.134	0.103329	0.706975	0.898874	Stable
ATN1	173.493	186.008	-0.100489	0.872816	0.963914	Stable
ATOH1	9.2224	37.8969	-2.03886	0.102798	0.432129	Stable
ATOH7	2.42963	4.42675	-0.865514	0.570757	NA	Stable
ATOH8	0.349188	23.5861	-6.07779	0.00224829	0.0540188	Stable
ATOX1	338.233	595.259	-0.815502	0.0416813	0.281895	Stable
ATP10A	49.6754	18.8721	1.39628	0.135223	0.489706	Stable
ATP10B	246.523	164.303	0.585362	0.215573	0.588302	Stable
ATP10D	1672.66	1232.76	0.44025	0.217163	0.590719	Stable
ATP11A	300.641	466.264	-0.633103	0.147866	0.508836	Stable
ATP11B	786.19	505.839	0.636201	0.0328794	0.248302	Stable
ATP11C	1275.83	941.462	0.438465	0.150379	0.512087	Stable
ATP12A	22.8222	10.157	1.16797	0.438332	0.766156	Stable
ATP13A1	123.344	94.3324	0.386858	0.561564	0.827827	Stable
ATP13A3	1677.67	1093.96	0.616895	0.00496912	0.0869639	Stable
ATP13A4	67.4363	38.5116	0.808231	0.225613	0.602398	Stable
ATP13A5	6.09879	10.3343	-0.76085	0.541403	0.818447	Stable
ATP1A1	2287.21	1890.5	0.274821	0.170001	0.535242	Stable
ATP1A2	18.0952	12.6664	0.514598	0.649532	0.870128	Stable
ATP1A3	19.454	30.9374	-0.669285	0.454253	0.775548	Stable
ATP1B1	159.037	70.3284	1.17718	0.113355	0.453039	Stable
ATP1B2	14.234	13.6298	0.0625745	0.937195	0.983148	Stable
ATP1B3	5007.22	7405.23	-0.564534	0.132605	0.486048	Stable
ATP1B4	13.1388	1.09129	3.58973	0.0184836	0.183335	Stable
ATP23	1699.31	1753.63	-0.0453975	0.851384	0.955546	Stable
ATP2A1	10.6177	6.50747	0.706299	0.486079	0.791119	Stable
ATP2A2	1794.19	1274.9	0.492957	0.0603239	0.337454	Stable
ATP2A3	6.46527	10.8197	-0.742877	0.500697	0.798697	Stable
ATP2B1	2423.1	2060.9	0.233584	0.193897	0.562855	Stable
ATP2B2	60.1318	37.1019	0.696636	0.355801	0.712549	Stable
ATP2B3	6.30083	4.58648	0.458155	0.771348	0.925134	Stable
ATP2B4	1491.1	1470.16	0.0204026	0.953181	0.989019	Stable
ATP2C1	597.426	357.877	0.739297	0.0025979	0.0589946	Stable
ATP2C2	108.158	66.2283	0.707623	0.326281	0.691764	Stable
ATP4A	13.7593	10.1958	0.432434	0.664165	0.87755	Stable
ATP4B	1.02027	4.46274	-2.12898	0.293617	NA	Stable
ATP5A1	9405.22	11623.6	-0.30552	0.268526	0.644449	Stable
ATP5B	6838.56	7732.34	-0.177213	0.735082	0.910907	Stable
ATP5C1	5199.28	6301.39	-0.27736	0.365728	0.719497	Stable
ATP5E	1246.54	1676.2	-0.427264	0.413043	0.750886	Stable
ATP5F1	2000.48	4331.84	-1.11464	0.0159367	0.168931	Stable
ATP5G2	3383.15	2453.03	0.463801	0.227541	0.604779	Stable
ATP5G3	5613.83	7438.56	-0.406039	0.362913	0.717722	Stable
ATP5H	2441.99	5603.03	-1.19815	0.0281429	0.22985	Stable
ATP5I	532.921	701.948	-0.397443	0.522459	0.809392	Stable
ATP5J	1691.62	2930.9	-0.792942	0.113726	0.453816	Stable
ATP5J2	1200.13	2117.01	-0.818836	0.440278	0.766885	Stable
ATP5L	4776.89	4760.27	0.00502903	0.989743	1	Stable
ATP5O	1651.98	5583.12	-1.75687	0.00355157	0.0712106	Stable
ATP5S	119.969	209.554	-0.804659	0.140264	0.49822	Stable
ATP5SL	935.113	1729.42	-0.887072	0.000331095	0.0147178	Stable
ATP6AP1	380.198	550.744	-0.534633	0.319703	0.687227	Stable
ATP6AP1L	1381.29	1143.6	0.272435	0.277763	0.652527	Stable
ATP6AP2	8932.69	6240.34	0.51747	0.0309377	0.240992	Stable
ATP6V0A1	998.189	692.124	0.528284	0.0666031	0.353002	Stable
ATP6V0A2	725.037	503.511	0.526031	0.0531714	0.319479	Stable
ATP6V0A4	1755.32	1338.75	0.390847	0.236052	0.614394	Stable
ATP6V0B	10168.5	9547.78	0.0908746	0.729614	0.907905	Stable
ATP6V0C	3109.68	4722.17	-0.602683	0.022795	0.204241	Stable
ATP6V0D1	2552.02	2063.27	0.306704	0.400615	0.743377	Stable
ATP6V0D2	614.259	1958.74	-1.67301	0.160055	0.524011	Stable
ATP6V0E1	3454.95	3178.68	0.120236	0.696309	0.8932	Stable
ATP6V1A	402.701	539.862	-0.42288	0.158722	0.522846	Stable
ATP6V1B1	17.6242	10.565	0.73826	0.632673	0.861722	Stable
ATP6V1B2	5996.58	4914.13	0.287202	0.0909741	0.408944	Stable
ATP6V1C1	2477.42	1967.76	0.332288	0.21525	0.588033	Stable
ATP6V1C2	2642.25	2926.83	-0.147572	0.535567	0.815332	Stable
ATP6V1D	5080.67	5470.45	-0.106639	0.703026	0.89656	Stable
ATP6V1E1	1958.76	2636.88	-0.428895	0.210245	0.582207	Stable
ATP6V1E2	27.4972	43.2918	-0.654807	0.468111	0.781693	Stable
ATP6V1F	395.401	977.921	-1.3064	0.0079415	0.113605	Stable
ATP6V1G1	2246.77	2292.41	-0.0290077	0.938894	0.983646	Stable
ATP6V1G2	26.147	34.3763	-0.394766	0.499573	0.79821	Stable
ATP6V1G3	113.273	665.815	-2.55532	0.0760241	0.375677	Stable
ATP6V1H	769.556	804.844	-0.0646832	0.772418	0.925327	Stable
ATP7A	220.514	122.62	0.846667	0.0457734	0.295298	Stable
ATP7B	129.541	114.833	0.173875	0.660971	0.876209	Stable
ATP8A1	838.494	415.013	1.01465	0.00406086	0.0772146	Stable
ATP8B1	382.956	202.424	0.919795	0.00106819	0.0326688	Stable
ATP8B2	225.793	218.462	0.0476168	0.946848	0.986517	Stable
ATP8B3	20.7874	54.8392	-1.39949	0.072817	0.368255	Stable
ATP8B4	274.014	155.723	0.815262	0.0749731	0.372955	Stable
ATP9A	218.791	129.068	0.761423	0.0752888	0.373691	Stable
ATP9B	75.2152	84.4143	-0.166463	0.776036	0.927174	Stable
ATPAF1	214.533	178.692	0.263727	0.52814	0.81224	Stable
ATPAF2	192.549	213.074	-0.146132	0.812464	0.939952	Stable
ATR	370.316	320.776	0.207192	0.362697	0.717722	Stable
ATRAID	717.763	817.62	-0.187924	0.497291	0.797319	Stable
ATRIP	153.131	166.536	-0.121067	0.73069	0.908732	Stable
ATRN	493.935	405.252	0.285502	0.295993	0.668954	Stable
ATRNL1	50.8121	22.1792	1.19597	0.0290626	0.233229	Stable
ATRX	2849.57	2205.93	0.369359	0.0382499	0.269728	Stable
ATXN1	1443.21	1703.17	-0.238947	0.608018	0.850738	Stable
ATXN10	277.226	286.765	-0.0488105	0.874429	0.964361	Stable
ATXN1L	1271.86	1108.63	0.198161	0.388518	0.735645	Stable
ATXN2	1947.69	1317.77	0.56366	0.00435073	0.0804176	Stable
ATXN2L	388.339	526.574	-0.439321	0.181677	0.547532	Stable
ATXN3	1390.39	1422.5	-0.0329357	0.895122	0.970157	Stable
ATXN7	1243.24	1139.24	0.126036	0.550591	0.822637	Stable
ATXN7L1	1195.62	1018.34	0.231535	0.269882	0.645003	Stable
ATXN7L2	19.9771	32.5018	-0.702175	0.418908	0.754197	Stable
ATXN7L3	123.768	171.163	-0.467733	0.234441	0.613021	Stable
ATXN7L3B	2229.77	2081.98	0.0989411	0.709056	0.899423	Stable
AUH	599.865	565.335	0.0855311	0.709941	0.899587	Stable
AUNIP	674.182	571.7	0.23788	0.391626	0.737524	Stable
AUP1	371.944	624.507	-0.747631	0.0210164	0.196147	Stable
AURKA	18217.3	15824.7	0.203127	0.385177	0.73364	Stable
AURKAIP1	162.772	227.421	-0.482516	0.39011	0.736479	Stable
AURKB	2815.34	2366.09	0.250808	0.342925	0.704875	Stable
AURKC	61.7572	178.21	-1.52889	0.0239401	0.209832	Stable
AUTS2	221.996	152.81	0.538799	0.0715177	0.36456	Stable
AVEN	2793.04	2269.66	0.299359	0.456844	0.776253	Stable
AVIL	590.843	985.044	-0.737413	0.0956645	0.419268	Stable
AVL9	1046.33	888.99	0.235095	0.32592	0.691308	Stable
AVP	0.0329881	0.131648	-1.99667	0.779195	NA	Stable
AVPI1	186.69	342.412	-0.875084	0.042163	0.28301	Stable
AVPR1A	33.5077	17.2998	0.953737	0.273572	0.647832	Stable
AVPR1B	1.84455	7.39381	-2.00305	0.476285	0.78688	Stable
AVPR2	0.0310091	0.0310091	0	1	NA	Stable
AWAT1	0.26504	0.111452	1.24979	0.861019	NA	Stable
AWAT2	0.490599	6.79365	-3.79157	0.105897	NA	Stable
AWN	0.850896	3.1285	-1.87842	0.479511	NA	Stable
AXDND1	170.877	85.8847	0.992488	0.0154022	0.165904	Stable
AXIN2	36.9634	35.4652	0.0596898	0.911723	0.975065	Stable
AXL	647.029	211.206	1.61518	0.300911	0.673837	Stable
AZGP1	3.1635	1.82782	0.791402	0.757561	NA	Stable
AZI2	306.351	281.686	0.121097	0.700904	0.895855	Stable
AZIN1	10076.7	5601.73	0.84708	0.00114323	0.0342466	Stable
AZIN2	1715.62	1655.2	0.0517227	0.902771	0.972409	Stable
AZU1	1.94186	1.62196	0.259699	0.930752	NA	Stable
B2M	153.905	412.808	-1.42343	0.0638858	0.345042	Stable
B3GALNT1	511.387	440.38	0.215666	0.305484	0.677302	Stable
B3GALNT2	890.009	737.242	0.271682	0.221167	0.595796	Stable
B3GALT1	44.7258	71.5157	-0.677153	0.34218	0.704498	Stable
B3GALT2	18.0823	9.87782	0.872316	0.462427	0.778684	Stable
B3GALT4	3.11624	30.7574	-3.30306	0.00607159	0.0976863	Stable
B3GALT5	0.83494	1.47786	-0.823768	0.758916	NA	Stable
B3GALT6	13.6595	50.0752	-1.87419	0.0536454	0.320984	Stable
B3GAT1	0.594927	0.594927	0	1	NA	Stable
B3GAT2	132.479	222.295	-0.746717	0.344624	0.705947	Stable
B3GAT3	46.2001	128.269	-1.4732	0.0672629	0.354607	Stable
B3GLCT	206.962	192.418	0.105122	0.782141	0.929663	Stable
B3GNT2	1669.54	715.935	1.22155	0.00241922	0.0564822	Stable
B3GNT3	424.561	274.982	0.626633	0.05224	0.316081	Stable
B3GNT4	13169.7	8715.41	0.595577	0.0979771	0.423771	Stable
B3GNT5	134.066	158.059	-0.237521	0.551656	0.823269	Stable
B3GNT6	0.133387	5.40783	-5.34136	0.0259199	NA	Stable
B3GNT7	0.547265	0.547265	0	1	NA	Stable
B3GNT8	4.88525	17.8964	-1.87317	0.152736	0.515969	Stable
B3GNT9	561.082	629.282	-0.165496	0.64277	0.867239	Stable
B3GNTL1	36.0767	45.2868	-0.328022	0.718374	0.902387	Stable
B4GALNT1	28.9314	31.3107	-0.114017	0.829807	0.946568	Stable
B4GALNT2	19.7111	36.964	-0.907115	0.238228	0.617155	Stable
B4GALNT3	52.5797	21.8487	1.26696	0.516388	0.806611	Stable
B4GALNT4	6.51735	10.2739	-0.656633	0.757503	0.919596	Stable
B4GALT1	414.509	345.362	0.263297	0.360195	0.716246	Stable
B4GALT2	33.692	148.327	-2.1383	0.0286307	0.231548	Stable
B4GALT3	536.276	393.465	0.446742	0.139467	0.496881	Stable
B4GALT5	1004.87	810.986	0.309261	0.128279	0.479408	Stable
B4GALT6	364.359	167.379	1.12224	0.00553136	0.0925152	Stable
B4GALT7	97.1571	185.592	-0.93374	0.00547005	0.0922042	Stable
B9D1	35.5102	28.0917	0.338092	0.738646	0.911892	Stable
B9D2	64.2728	205.712	-1.67835	0.00843475	0.117944	Stable
BAALC	25.3358	25.1089	0.0129781	0.985481	1	Stable
BABAM1	781.06	643.558	0.279364	0.284826	0.659362	Stable
BABAM2	255.333	266.661	-0.0626261	0.855968	0.95736	Stable
BACE2	506.815	299.218	0.760263	0.0727965	0.368245	Stable
BACH1	724.925	737.429	-0.0246725	0.937417	0.983148	Stable
BACH2	59.9038	36.0936	0.730904	0.171619	0.53741	Stable
BAD	402.106	771.836	-0.940717	0.101272	0.429569	Stable
BAG1	883.702	694.536	0.34751	0.261451	0.638978	Stable
BAG2	73.0317	78.9726	-0.112828	0.803602	0.938007	Stable
BAG3	183.657	198.017	-0.108611	0.834875	0.948293	Stable
BAG4	1122.25	934.271	0.264479	0.456475	0.776135	Stable
BAG6	423.943	714.974	-0.75402	0.0196884	0.188966	Stable
BAHCC1	113.778	7.07769	4.0068	0.073694	0.369959	Stable
BAHD1	226.901	105.785	1.10093	0.100084	0.427764	Stable
BAIAP2	371.988	347.245	0.0993032	0.798515	0.936242	Stable
BAIAP2L1	474.222	413.2	0.198722	0.464916	0.779848	Stable
BAIAP2L2	31.6464	9.16131	1.78841	0.0221579	0.202241	Stable
BAIAP3	33.4884	43.0283	-0.361624	0.566039	0.830419	Stable
BAK1	73.2957	150.398	-1.03698	0.0859944	0.398207	Stable
BAMBI	53.1173	36.5759	0.538288	0.464948	0.779848	Stable
BANF1	2695.9	2356.17	0.194325	0.712136	0.900134	Stable
BANF2	1.40363	0.643866	1.12433	0.747011	NA	Stable
BANK1	462.174	331.08	0.481258	0.166976	0.53187	Stable
BANP	75.9986	381.807	-2.3288	0.00216505	0.0529505	Stable
BAP1	983.07	743.492	0.402976	0.126636	0.476846	Stable
BARD1	797.347	725.331	0.136569	0.628023	0.859627	Stable
BARHL1	0.180604	0.180604	0	1	NA	Stable
BARHL2	10.3225	3.1395	1.71719	0.164368	0.530021	Stable
BARX1	0.137466	4.67913	-5.08909	0.0240831	NA	Stable
BARX2	77.0563	87.1035	-0.176819	0.70825	0.899305	Stable
BASP1	1205.54	1097.08	0.136009	0.750266	0.916443	Stable
BATF	0.0939319	0.148073	-0.656618	0.926983	NA	Stable
BATF2	6.59812	13.7706	-1.06147	0.320547	0.687328	Stable
BATF3	9.68338	77.7837	-3.00588	0.00215826	0.0529232	Stable
BAX	57.7767	59.3176	-0.0379719	0.929497	0.981606	Stable
BAZ1A	3721.19	2690.02	0.468149	0.0293413	0.234518	Stable
BAZ1B	844.913	648.765	0.381108	0.114974	0.456086	Stable
BAZ2A	1607.66	1153.21	0.479311	0.0618137	0.34157	Stable
BAZ2B	194.712	200.178	-0.0399452	0.912965	0.975162	Stable
BBC3	10.1092	35.0049	-1.79189	0.129835	0.48158	Stable
BBIP1	2413.07	2513.8	-0.0589988	0.785402	0.931531	Stable
BBOF1	62.3277	86.4536	-0.472054	0.259451	0.638044	Stable
BBOX1	851.765	629.392	0.436497	0.305753	0.677302	Stable
BBS1	27.9725	81.4612	-1.5421	0.0518221	0.314318	Stable
BBS10	18.2423	30.6022	-0.746349	0.335087	0.698334	Stable
BBS12	221.244	191.175	0.210743	0.435282	0.76475	Stable
BBS2	1559.6	1192.61	0.387045	0.277433	0.652049	Stable
BBS4	292.883	298.75	-0.0286136	0.929537	0.981606	Stable
BBS5	675.237	579.103	0.221572	0.615926	0.852955	Stable
BBS9	107.257	112.711	-0.071553	0.845619	0.952466	Stable
BBX	1227.01	907.477	0.435214	0.0314214	0.242163	Stable
BCAM	26.4747	11.0438	1.26137	0.34747	0.70741	Stable
BCAN	70.0242	77.3563	-0.143664	0.706849	0.898827	Stable
BCAP29	593.949	586.481	0.0182543	0.954811	0.989347	Stable
BCAP31	895.363	1003.53	-0.16454	0.73999	0.912116	Stable
BCAR1	48.7032	202.308	-2.05446	0.0430501	0.28523	Stable
BCAR3	1487.49	1165.79	0.351575	0.291099	0.664965	Stable
BCAS1	520.979	490.571	0.0867625	0.885393	0.968028	Stable
BCAS2	6432.93	4272.8	0.590295	0.139267	0.496454	Stable
BCAS3	442.115	402.677	0.134798	0.629945	0.86041	Stable
BCAS4	515.205	658.424	-0.353871	0.403878	0.745407	Stable
BCAT1	2058.68	2060.32	-0.00114702	0.998193	1	Stable
BCAT2	120.698	72.5306	0.734738	0.153445	0.516411	Stable
BCCIP	3094.68	2624.56	0.237715	0.300292	0.67349	Stable
BCDIN3D	715.19	675.714	0.0819123	0.784621	0.931189	Stable
BCHE	17.3901	68.1376	-1.97018	0.0150855	0.163618	Stable
BCKDHA	226.096	355.896	-0.654519	0.0204488	0.192933	Stable
BCKDHB	207.409	258.482	-0.317585	0.420356	0.755197	Stable
BCKDK	1098.19	1126.78	-0.0370828	0.875643	0.964844	Stable
BCL10	250.531	288.98	-0.205982	0.296424	0.66941	Stable
BCL11A	5.25371	7.3195	-0.47841	0.661217	0.876369	Stable
BCL11B	0.209123	1.21566	-2.53931	0.720783	NA	Stable
BCL2	14.0425	29.8364	-1.08727	0.273987	0.648496	Stable
BCL2A1	0.69926	6.60356	-3.23934	0.377188	NA	Stable
BCL2L1	9219.5	8588.48	0.102285	0.749456	0.915909	Stable
BCL2L10	1099.93	1146.45	-0.0597675	0.890256	0.969347	Stable
BCL2L12	123.188	127.181	-0.0460164	0.931235	0.982043	Stable
BCL2L13	812.551	771.987	0.0738807	0.757951	0.919599	Stable
BCL2L14	3629.33	2261.03	0.682727	0.0681035	0.35611	Stable
BCL3	39.9597	48.0178	-0.265027	0.644614	0.867803	Stable
BCL6	76.1804	88.5337	-0.216808	0.806391	0.938891	Stable
BCL6B	83.9255	122.107	-0.540968	0.427756	0.75963	Stable
BCL7A	222.157	243.73	-0.133704	0.744759	0.913931	Stable
BCL7B	1058.34	898.648	0.235969	0.40028	0.743377	Stable
BCL7C	55.9626	82.1302	-0.553449	0.30877	0.679435	Stable
BCL9	470.089	396.825	0.244431	0.258222	0.63714	Stable
BCL9L	266.829	33.3206	3.00143	0.0350499	0.2568	Stable
BCLAF1	2805.26	1442.75	0.959311	0.00411992	0.0776979	Stable
BCO1	15.676	17.2021	-0.134029	0.895361	0.970215	Stable
BCO2	74.031	100.658	-0.443259	0.182161	0.548249	Stable
BCOR	130.475	171.807	-0.397011	0.390743	0.736964	Stable
BCORL1	110.95	108.052	0.0381785	0.92134	0.978311	Stable
BCR	278.059	188.948	0.557402	0.104766	0.436867	Stable
BCS1L	131.776	281.443	-1.09476	0.005472	0.0922042	Stable
BDH1	316.984	484.408	-0.611812	0.134621	0.488611	Stable
BDH2	43.5521	107.828	-1.30791	0.166397	0.531765	Stable
BDKRB1	3.50925	5.53196	-0.656629	0.876307	0.965254	Stable
BDKRB2	7.81311	6.27883	0.315402	0.873918	0.964119	Stable
BDNF	118.156	237.426	-1.00678	0.0279978	0.229352	Stable
BDP1	1459.24	1255.4	0.217065	0.426551	0.759094	Stable
BEAN1	2.89669	2.02288	0.51799	0.764033	NA	Stable
BECN1	1065.63	713.179	0.579365	0.0440889	0.288607	Stable
BECN2	2044.87	1013.6	1.01252	0.143271	0.502482	Stable
BEGAIN	1.15727	0.129604	3.15854	0.656618	NA	Stable
BEND2	4.19339	1.69259	1.30889	0.535155	NA	Stable
BEND3	183.678	92.1112	0.995734	0.0104847	0.134061	Stable
BEND4	14.0027	21.851	-0.641992	0.499172	0.79821	Stable
BEND5	8.10496	0.725497	3.48176	0.0980085	0.423815	Stable
BEND6	60.6492	15.8725	1.93396	0.0941088	0.416097	Stable
BEND7	144.844	140.332	0.0456561	0.901707	0.972409	Stable
BEST1	15.8699	24.3855	-0.619733	0.479639	0.787805	Stable
BEST3	1.2344	10.5262	-3.0921	0.0603054	0.337445	Stable
BEST4	2.45254	6.47414	-1.40041	0.447275	0.770869	Stable
BET1	1076.33	1523.85	-0.501604	0.176796	0.542233	Stable
BET1L	904.014	943.071	-0.0610215	0.805217	0.938418	Stable
BEX3	450.068	468.094	-0.0566548	0.881534	0.966646	Stable
BEX4	1936.31	4453.08	-1.20149	0.0512476	0.313127	Stable
BEX5	1.91954	3.16437	-0.72116	0.800462	NA	Stable
BFAR	422.586	420.064	0.00863669	0.969157	0.994462	Stable
BFSP1	6.41213	1.43469	2.16006	0.427372	NA	Stable
BFSP2	0.455853	1.3261	-1.54056	0.64587	NA	Stable
BGLAP	4.97313	0.457156	3.44339	0.0699631	NA	Stable
[truncated: 18,568 more rows]

## Sheet: Fig. S8
Supplemental Table S5. Differentially expressed genes between siKDM5B/C and Ctrl IVF 4-cell embryos, SCNT 4-cell embryos and IVF 4-cell embryos, and GSK126-treated IVF blastocyst and untreated blastocyst
Gene	GSK126-treated Bl_normalized	Ctrl Bl_normalized	log2FoldChange	pvalue	padj	Status
A1BG	20.1524	3.62105	2.47647	0.026936	NA	Stable
A1CF	60.3293	52.9155	0.189168	0.870464	0.943686	Stable
A2M	7.63342	3.30909	1.20589	0.398233	NA	Stable
A2ML1	17.5429	6.93685	1.33853	0.163203	NA	Stable
A3GALT2	0.139588	0.0760947	0.875307	0.86088	NA	Stable
A4GALT	1.16905	1.71634	-0.554001	0.827967	NA	Stable
A4GNT	18.3371	4.52842	2.01768	0.104519	NA	Stable
AAAS	150.298	78.8939	0.929841	0.008778	0.0661505	Stable
AACS	20.6115	35.1096	-0.76842	0.221919	NA	Stable
AADACL2	1.00512	2.46957	-1.2969	0.600486	NA	Stable
AADACL3	0.21955	0.21955	0	1	NA	Stable
AADACL4	0	0	NA	NA	NA	Stable
AADAT	25.6607	24.0236	0.0951123	0.887415	NA	Stable
AAED1	48.55	29.5788	0.71491	0.196179	0.43872	Stable
AAGAB	933.552	637.563	0.550163	0.0140503	0.0891218	Stable
AAK1	261.081	259.047	0.0112838	0.973333	0.992162	Stable
AAMDC	82.7011	95.1236	-0.201897	0.611405	0.807878	Stable
AAMP	79.9995	45.9746	0.799152	0.0806094	0.261748	Stable
AAR2	232.069	131.152	0.823308	0.00938737	0.0692315	Stable
AARD	49.5993	18.2305	1.44397	0.137222	NA	Stable
AARS	1060.92	1797.66	-0.760802	0.00127952	0.0184329	Stable
AARS2	46.9019	43.5481	0.107036	0.841742	0.93037	Stable
AARSD1	366.497	266.84	0.457828	0.0629363	0.225691	Stable
AASDH	1017.42	1116.31	-0.133821	0.484232	0.716313	Stable
AASDHPPT	3168.26	4026.18	-0.345721	0.054104	0.205644	Stable
AASS	1957.1	3665.74	-0.905386	1.07445e-06	0.00011365	Stable
AATF	139.52	110.576	0.33543	0.364555	0.614601	Stable
AATK	0.506065	0.724872	-0.518402	0.914274	NA	Stable
ABAT	8.16071	8.85736	-0.118183	0.917493	NA	Stable
ABCA1	861.139	1354.62	-0.653567	0.000692267	0.012385	Stable
ABCA12	106.497	241.681	-1.18229	0.0025382	0.0290742	Down
ABCA2	0	0	NA	NA	NA	Stable
ABCA3	3.48345	3.99333	-0.197076	0.909565	NA	Stable
ABCA4	86.3493	60.2129	0.520113	0.230685	0.479206	Stable
ABCA5	507.445	620.123	-0.289302	0.355765	0.605632	Stable
ABCA6	23.2487	2.47252	3.2331	0.0838877	NA	Stable
ABCA7	9.46525	9.81013	-0.0516318	0.959041	NA	Stable
ABCB1	1112.62	5022	-2.1743	2.1875e-31	1.28417e-27	Down
ABCB10	420.113	845.49	-1.00901	1.93885e-06	0.000175108	Down
ABCB11	8.9875	13.2484	-0.559825	0.80147	NA	Stable
ABCB4	358.056	932.237	-1.38051	0.00128406	0.0184531	Down
ABCB5	39.6195	62.9778	-0.668631	0.179803	0.420762	Stable
ABCB6	228.865	289.175	-0.337447	0.260231	0.510668	Stable
ABCB7	1274.2	1557.67	-0.289794	0.17014	0.406674	Stable
ABCB8	55.2217	50.7545	0.1217	0.811768	0.914357	Stable
ABCB9	5.89829	3.37335	0.806117	0.603192	NA	Stable
ABCC1	55.6981	14.2121	1.97051	0.00599534	NA	Stable
ABCC10	6.16016	7.55502	-0.294468	0.813393	NA	Stable
ABCC11	1.9736	2.98822	-0.598454	0.766489	NA	Stable
ABCC12	2.6948	1.67019	0.690168	0.770246	NA	Stable
ABCC2	3600.31	6370.39	-0.823262	6.58324e-05	0.00240791	Stable
ABCC3	34.1597	53.5869	-0.649587	0.211555	0.457228	Stable
ABCC4	92.2111	60.6636	0.60411	0.198908	0.441637	Stable
ABCC5	606.11	677.323	-0.160265	0.499339	0.726388	Stable
ABCC6	17.178	29.8474	-0.797042	0.446284	NA	Stable
ABCC8	0.403611	0.403611	0	1	NA	Stable
ABCC9	0.363315	1.54291	-2.08636	0.5615	NA	Stable
ABCD1	2.39912	2.14317	0.162764	0.935975	NA	Stable
ABCD2	25.1004	9.04997	1.47172	0.292945	NA	Stable
ABCD3	1794.84	1900.66	-0.0826444	0.648242	0.831553	Stable
ABCD4	38.7643	28.2783	0.455032	0.445694	NA	Stable
ABCE1	1987.31	2084.47	-0.0688668	0.701031	0.857823	Stable
ABCF1	1106.72	729.082	0.602132	0.00545206	0.0480936	Stable
ABCF2	591.112	351.494	0.749932	0.0051988	0.0468258	Stable
ABCF3	1007.44	978.82	0.0415809	0.849194	0.934771	Stable
ABCG1	1.94855	1.72343	0.177121	0.943832	NA	Stable
ABCG2	2291.79	1954.42	0.229738	0.303053	0.55518	Stable
ABCG4	1.90278	0.529399	1.84568	0.590445	NA	Stable
ABCG5	730.297	1323.59	-0.857904	0.00504658	0.0459673	Stable
ABCG8	4.47099	4.47099	0	1	NA	Stable
ABHD1	13.5578	20.6243	-0.605219	0.464894	NA	Stable
ABHD10	270.357	391.956	-0.535826	0.0368	0.162738	Stable
ABHD11	594.559	606.165	-0.0278895	0.908294	0.963001	Stable
ABHD12	1310.84	1082.4	0.276268	0.260005	0.510447	Stable
ABHD12B	621.531	565.313	0.136776	0.611982	0.808333	Stable
ABHD13	310.747	307.801	0.0137452	0.955628	0.983851	Stable
ABHD14A	28.8097	18.3821	0.648251	0.343147	NA	Stable
ABHD14B	21.3551	26.5127	-0.312101	0.649223	NA	Stable
ABHD15	2.90977	3.88759	-0.417973	0.850389	NA	Stable
ABHD16A	87.2284	77.4913	0.170762	0.6645	0.840379	Stable
ABHD16B	0.139588	0.0760947	0.875307	0.86088	NA	Stable
ABHD17A	85.6317	82.9398	0.0460811	0.917844	0.968144	Stable
ABHD17B	1078.84	1379.01	-0.354151	0.0942147	0.289045	Stable
ABHD17C	414.812	476.912	-0.201265	0.502331	0.728411	Stable
ABHD18	1064.29	2052.58	-0.94755	5.49432e-05	0.002122	Stable
ABHD2	114.222	98.6348	0.211676	0.535998	0.753435	Stable
ABHD3	182.786	116.857	0.645405	0.0694731	0.239696	Stable
ABHD4	160.41	172.494	-0.104781	0.79583	0.907651	Stable
ABHD5	310.663	285.192	0.123418	0.666529	0.840962	Stable
ABHD6	47.2157	43.8109	0.107975	0.824559	0.921927	Stable
ABHD8	0.297508	0.155747	0.933725	0.85158	NA	Stable
ABI1	2125.5	2190.4	-0.0433924	0.808968	0.912958	Stable
ABI2	232.254	239.168	-0.0423194	0.897116	0.957432	Stable
ABI3BP	443.055	859.285	-0.955651	0.00502245	0.0458905	Stable
ABL1	256.333	406.33	-0.664635	0.0284876	0.139655	Stable
ABL2	587.136	886.143	-0.593845	0.0126199	0.0832336	Stable
ABLIM1	151.723	162.208	-0.0964037	0.773036	0.896328	Stable
ABLIM2	0.502668	0.135343	1.89299	0.698801	NA	Stable
ABLIM3	12.9478	11.2353	0.204678	0.841589	NA	Stable
ABO	2.30504	0.82815	1.47683	0.605264	NA	Stable
ABR	173.056	132.276	0.387688	0.27595	0.527645	Stable
ABRA	1.31353	1.31353	0	1	NA	Stable
ABRACL	1879.15	1825.07	0.0421309	0.848738	0.934718	Stable
ABRAXAS1	1413.07	1854.74	-0.392381	0.105181	0.306587	Stable
ABRAXAS2	2135.13	2191.63	-0.0376761	0.854134	0.936497	Stable
ABT1	512.104	359.072	0.512163	0.0361784	0.161103	Stable
ABTB1	13.4515	15.4757	-0.202232	0.814723	NA	Stable
ABTB2	63.6527	67.1586	-0.0773509	0.858147	0.937804	Stable
ACAA1	317.713	261.518	0.280817	0.298377	0.55014	Stable
ACAA2	354.937	251.047	0.499602	0.0453282	0.18585	Stable
ACACA	1272.57	800.663	0.668481	0.0619555	0.223149	Stable
ACACB	10.2405	2.75941	1.89186	0.376462	NA	Stable
ACAD10	101.7	134.022	-0.398159	0.334595	0.58508	Stable
ACAD11	400.607	433.182	-0.112786	0.664294	0.840379	Stable
ACAD8	388.309	348.101	0.157701	0.553774	0.767091	Stable
ACAD9	209.196	165.512	0.337916	0.25709	0.507395	Stable
ACADL	813.741	442.194	0.87989	0.000417414	0.00870489	Stable
ACADM	2984.89	3126.78	-0.0669991	0.705693	0.860926	Stable
ACADS	115.892	133.158	-0.200357	0.564888	0.776165	Stable
ACADSB	529.782	556.313	-0.0704982	0.820123	0.919067	Stable
ACADVL	247.767	215.697	0.199975	0.529111	0.749644	Stable
ACAN	7.74343	0.349683	4.46885	0.0361412	NA	Stable
ACAP1	9.01222	6.29919	0.516717	0.758495	NA	Stable
ACAP2	939.746	1343.16	-0.51529	0.00890681	0.0667357	Stable
ACAP3	1.81419	2.08159	-0.198356	0.940154	NA	Stable
ACAT1	4578.65	6865.1	-0.584357	0.00207556	0.0252792	Stable
ACAT2	1430.6	1252.74	0.191528	0.382559	0.629609	Stable
ACBD3	217.533	268.497	-0.30367	0.279398	0.530743	Stable
ACBD4	9.6758	11.4212	-0.239266	0.822375	NA	Stable
ACBD5	538.797	877.631	-0.703872	0.000686778	0.0123294	Stable
ACBD6	67.4106	125.583	-0.89759	0.0169459	0.0995306	Stable
ACBD7	352.917	445.729	-0.336838	0.334787	0.585094	Stable
ACCS	5.31039	3.81884	0.475684	0.832654	NA	Stable
ACCSL	29714.3	21749.9	0.450151	0.0753232	0.252088	Stable
ACD	55.0272	41.4907	0.407357	0.38988	0.635437	Stable
ACE	0.139588	0.0760947	0.875307	0.86088	NA	Stable
ACE2	6.1252	3.9619	0.628566	0.709894	NA	Stable
ACER1	19.6428	9.25218	1.08614	0.214383	NA	Stable
ACER2	2.34412	0.26202	3.1613	0.344933	NA	Stable
ACER3	2201.07	3120.89	-0.503751	0.0120808	0.0811443	Stable
ACHE	0.139891	0.608712	-2.12146	0.669943	NA	Stable
ACIN1	1233.63	1536.71	-0.316937	0.151749	0.379002	Stable
ACKR1	1.60269	0.149542	3.42187	0.402577	NA	Stable
ACKR2	10.4097	5.58206	0.899052	0.696794	NA	Stable
ACKR3	0.0758983	0.877838	-3.53181	0.467353	NA	Stable
ACKR4	4.71152	3.02525	0.639138	0.711969	NA	Stable
ACLY	637.591	914.009	-0.519578	0.0356578	0.159915	Stable
ACMSD	6.21905	9.67973	-0.638273	0.612305	NA	Stable
ACO1	203.857	264.629	-0.376413	0.199529	0.442264	Stable
ACO2	809.297	895.108	-0.145391	0.502416	0.728411	Stable
ACOD1	1.12075	1.12075	0	1	NA	Stable
ACOT11	237.912	94.3001	1.3351	1.55832e-05	0.000867123	Up
ACOT12	4.9481	7.36562	-0.573931	0.673076	NA	Stable
ACOT13	3080.91	4395.15	-0.512556	0.0722518	0.245578	Stable
ACOT6	123.822	144.437	-0.222171	0.512706	0.736353	Stable
ACOT7	187.883	133.97	0.487929	0.14502	0.368867	Stable
ACOT8	73.7368	57.3605	0.362328	0.380293	0.628416	Stable
ACOT9	1201.87	1034.58	0.216238	0.473498	0.706396	Stable
ACOX1	1938.53	2409.28	-0.313637	0.0783785	0.257251	Stable
ACOX2	32.6467	37.1141	-0.185033	0.763076	NA	Stable
ACOX3	15.2964	21.9694	-0.522309	0.488151	NA	Stable
ACOXL	0.38404	0.550038	-0.518274	0.915555	NA	Stable
ACP1	2306.92	2745.01	-0.250842	0.18386	0.425526	Stable
ACP2	45.5817	50.92	-0.159776	0.786916	0.903941	Stable
ACP5	0.282934	0.282934	0	1	NA	Stable
ACP6	466.857	443.315	0.0746472	0.828315	0.924102	Stable
ACP7	20.3044	8.95595	1.18087	0.173675	NA	Stable
ACPP	30.163	6.87564	2.13322	0.028298	NA	Stable
ACPT	30.9425	12.347	1.32543	0.0744582	NA	Stable
ACR	0.154573	0.594751	-1.944	0.696769	NA	Stable
ACRBP	2.25726	1.7663	0.353844	0.884378	NA	Stable
ACRV1	16.5581	48.1883	-1.54115	0.403611	NA	Stable
ACSBG1	1921.93	2192.72	-0.190168	0.296639	0.548652	Stable
ACSBG2	0.139588	0.0760947	0.875307	0.86088	NA	Stable
ACSF2	49.5657	21.758	1.18779	0.0400928	NA	Stable
ACSF3	29.8928	26.4459	0.176753	0.790081	NA	Stable
ACSL1	249.523	306.408	-0.29628	0.281117	0.532754	Stable
ACSL3	20757.7	13122.5	0.661608	0.000259584	0.00621823	Stable
ACSL4	206.271	285.901	-0.470974	0.369391	0.618993	Stable
ACSL5	436.865	395.546	0.143342	0.917632	0.968144	Stable
ACSL6	2532.74	4692.44	-0.889637	3.49205e-05	0.00150736	Stable
ACSM2B	0.776743	8.62965	-3.47379	0.117745	NA	Stable
ACSM3	78.1584	89.0204	-0.187735	0.670574	0.842054	Stable
ACSM4	10.5356	7.57955	0.47509	0.668371	NA	Stable
ACSM5	0.0943113	0.0943113	0	1	NA	Stable
ACSS1	1.34034	0.642691	1.0604	0.740393	NA	Stable
ACSS2	109.17	125.785	-0.204384	0.593035	0.794775	Stable
ACSS3	216.322	283.091	-0.388089	0.254722	0.505193	Stable
ACTA1	33.1292	20.5654	0.687883	0.328084	NA	Stable
ACTA2	6.09695	0.275232	4.46937	0.0431809	NA	Stable
ACTB	15680.8	21917.3	-0.483071	0.007151	0.0582017	Stable
ACTBL2	0.463799	0.87718	-0.919375	0.846645	NA	Stable
ACTC1	38.0308	8.83718	2.10551	0.0089526	NA	Stable
ACTG1	18909	25772.9	-0.446779	0.0139215	0.0885324	Stable
ACTG2	4.82225	2.67469	0.850335	0.674461	NA	Stable
ACTL10	0.69767	1.24837	-0.83943	0.821809	NA	Stable
ACTL6A	995.773	869.301	0.195962	0.336604	0.586795	Stable
ACTL6B	0.189556	0.729357	-1.944	0.696769	NA	Stable
ACTL7A	0.354059	0.0953288	1.89301	0.698798	NA	Stable
ACTL7B	8.71795	67.943	-2.96226	0.1112	0.315514	Stable
ACTL8	2.7309	2.7309	0	1	NA	Stable
ACTL9	0	0	NA	NA	NA	Stable
ACTN1	192.592	287.479	-0.577908	0.0431765	0.18002	Stable
ACTN2	10.6281	13.0227	-0.293143	0.806	NA	Stable
ACTN3	1.09805	0.660935	0.732362	0.837864	NA	Stable
ACTN4	124.165	281.908	-1.18296	0.000541699	0.0104264	Down
ACTR10	1645.68	1760.06	-0.0969473	0.591201	0.793707	Stable
ACTR1A	299.692	351.377	-0.229537	0.356605	0.606358	Stable
ACTR1B	12.3116	6.28409	0.97024	0.403538	NA	Stable
ACTR2	3173.73	4785.64	-0.592532	0.00153491	0.020829	Stable
ACTR3	4928.1	5699.51	-0.209807	0.260396	0.510811	Stable
ACTR3B	117.094	134.128	-0.195944	0.681507	0.847355	Stable
ACTR5	46.5969	33.3997	0.480398	0.423557	0.664697	Stable
ACTR6	1175.76	1582.11	-0.428258	0.0395617	0.170371	Stable
ACTR8	499.095	427.22	0.224336	0.308998	0.560828	Stable
ACTRT2	0.512001	0.512001	0	1	NA	Stable
ACTRT3	20.3246	3.74685	2.43948	0.167263	NA	Stable
ACVR1	161.013	260.273	-0.692848	0.00936332	0.0690979	Stable
ACVR1B	37.841	103.612	-1.45317	0.0100443	0.0722166	Stable
ACVR1C	4.58564	2.21372	1.05065	0.64108	NA	Stable
ACVR2A	259.073	278.721	-0.105468	0.711057	0.863783	Stable
ACVR2B	350.914	570.895	-0.702108	0.00306563	0.0330216	Stable
ACVRL1	1.56019	1.56019	0	1	NA	Stable
ACY1	1341.84	1528.72	-0.188113	0.367863	0.617363	Stable
ACY3	0.642196	0.642196	0	1	NA	Stable
ACYP1	839.214	1412.59	-0.75123	0.000108254	0.00330993	Stable
ACYP2	3732.74	4597.02	-0.300465	0.208106	0.453533	Stable
ADA	39.7988	44.6833	-0.167011	0.746744	0.882489	Stable
ADA2	4.11617	3.04413	0.435274	0.793556	NA	Stable
ADAD1	688.958	247.268	1.47834	1.81703e-06	0.000167982	Up
ADAD2	0.938696	0.511416	0.876162	0.836566	NA	Stable
ADAL	348.423	381.014	-0.129005	0.586268	0.790466	Stable
ADAM10	878.626	962.682	-0.131809	0.533599	0.7521	Stable
ADAM11	2.55245	1.75729	0.538536	0.816947	NA	Stable
ADAM12	43.4274	83.797	-0.948293	0.231859	0.480284	Stable
ADAM15	0.79599	1.17036	-0.556129	0.860616	NA	Stable
ADAM17	1064.9	1313.95	-0.303184	0.208971	0.454274	Stable
ADAM19	385.507	736.476	-0.933883	0.000168417	0.00456671	Stable
ADAM2	1.02718	0.559321	0.876946	0.819012	NA	Stable
ADAM22	59.4065	53.8924	0.140539	0.8681	0.942898	Stable
ADAM23	16.274	13.6321	0.25557	0.802164	NA	Stable
ADAM28	0.692547	0.377549	0.875248	0.860889	NA	Stable
ADAM29	3.80331	12.1659	-1.67752	0.226991	NA	Stable
ADAM30	0	0	NA	NA	NA	Stable
ADAM33	30.7634	30.1076	0.0310895	0.963075	NA	Stable
ADAM3A	9.67718	47.519	-2.29584	0.0831243	NA	Stable
ADAM5	13.7859	19.7811	-0.52093	0.528139	NA	Stable
ADAM7	4.46881	12.5656	-1.49152	0.470569	NA	Stable
ADAM8	70.0158	158.322	-1.17711	0.00208789	0.0253767	Down
ADAM9	554.239	1212.07	-1.12889	3.88131e-06	0.00028842	Down
ADAMDEC1	1.18533	0.130652	3.1815	0.478662	NA	Stable
ADAMTS1	126.857	54.0407	1.23108	0.00628523	0.0530517	Stable
ADAMTS10	1.62376	5.04996	-1.63693	0.49369	NA	Stable
ADAMTS12	268.265	129.674	1.04877	0.12734	0.342929	Stable
ADAMTS13	1.94655	1.06662	0.867868	0.747206	NA	Stable
ADAMTS14	4.06301	4.06301	0	1	NA	Stable
ADAMTS15	6.29537	6.99976	-0.153015	0.906049	NA	Stable
ADAMTS16	0.323379	0.323379	0	1	NA	Stable
ADAMTS17	5.62728	12.2982	-1.12793	0.326446	NA	Stable
ADAMTS18	103.2	77.4437	0.414222	0.516026	0.739308	Stable
ADAMTS19	75.5154	55.4982	0.444331	0.549111	0.763785	Stable
ADAMTS2	20.7347	1.56798	3.72507	0.041034	NA	Stable
ADAMTS20	3.11282	4.64029	-0.57599	0.756379	NA	Stable
ADAMTS3	11.6461	30.0802	-1.36897	0.233201	NA	Stable
ADAMTS4	3.14143	3.14143	0	1	NA	Stable
ADAMTS5	30.1448	27.8065	0.116487	0.901211	NA	Stable
ADAMTS6	126.001	151.973	-0.270389	0.630483	0.819552	Stable
ADAMTS7	47.5154	60.1822	-0.340942	0.464516	0.698499	Stable
ADAMTS8	40.9225	26.7028	0.615906	0.315242	NA	Stable
ADAMTS9	95.903	55.0459	0.800941	0.103414	0.303393	Stable
ADAMTSL1	93.5541	62.0347	0.592726	0.371009	0.619721	Stable
ADAMTSL2	2.9094	4.28054	-0.557067	0.766001	NA	Stable
ADAMTSL3	16.1192	3.5696	2.17494	0.114335	NA	Stable
ADAMTSL4	27.3283	15.6557	0.803706	0.259119	NA	Stable
ADAMTSL5	10.3006	7.23165	0.51033	0.646002	NA	Stable
ADAP1	4.77219	6.82264	-0.515677	0.830761	NA	Stable
ADAP2	21.1133	10.4138	1.01966	0.227628	NA	Stable
ADAR	123.361	216.352	-0.810497	0.0226677	0.120154	Stable
ADARB1	5.91161	4.10739	0.525329	0.742619	NA	Stable
ADARB2	2.43283	12.9844	-2.41607	0.0911633	NA	Stable
ADAT1	108.295	94.1664	0.201685	0.607666	0.805079	Stable
ADAT2	129.768	85.6888	0.598759	0.124394	0.338945	Stable
ADAT3	6.65926	2.1571	1.62627	0.325767	NA	Stable
ADCK1	80.1578	54.7307	0.550492	0.210739	0.45659	Stable
ADCK2	80.3749	80.2327	0.00255464	0.995052	1	Stable
ADCK5	15.2421	21.4329	-0.491761	0.520025	NA	Stable
ADCY1	1.44761	0.402256	1.84749	0.589651	NA	Stable
ADCY10	100.681	79.9353	0.332893	0.448841	0.684307	Stable
ADCY2	6.3404	5.29579	0.259726	0.852898	NA	Stable
ADCY3	35.3503	42.6008	-0.269157	0.684708	0.84846	Stable
ADCY4	2.63144	0.411287	2.67764	0.354416	NA	Stable
ADCY5	8.55952	2.26284	1.91939	0.389231	NA	Stable
ADCY6	3.27455	3.27455	0	1	NA	Stable
ADCY7	3.84391	2.4865	0.628458	0.730982	NA	Stable
ADCY8	19.5334	28.7015	-0.555184	0.409721	NA	Stable
ADCY9	59.6176	61.3957	-0.0424009	0.927688	0.971487	Stable
ADCYAP1	67.5043	18.3037	1.88285	0.312953	0.565115	Stable
ADCYAP1R1	62.2112	33.1466	0.908312	0.238731	0.487274	Stable
ADD1	253.463	325.32	-0.360087	0.208894	0.454274	Stable
ADD2	4.40898	9.77189	-1.14819	0.34204	NA	Stable
ADD3	864.448	495.683	0.802361	0.00268474	0.0300742	Stable
ADGB	40.0325	49.7746	-0.314237	0.626164	0.817228	Stable
ADGRA1	0	0	NA	NA	NA	Stable
ADGRA2	19.0484	26.9511	-0.500677	0.475411	NA	Stable
ADGRA3	1202.42	1069.26	0.169329	0.587934	0.791257	Stable
ADGRB1	1.03873	0.134677	2.94724	0.542297	NA	Stable
ADGRB2	2.0935	0.761862	1.45832	0.598373	NA	Stable
ADGRB3	52.1777	65.1525	-0.320386	0.664527	0.840379	Stable
ADGRD1	34.3873	31.7298	0.116034	0.87098	NA	Stable
ADGRD2	0	0	NA	NA	NA	Stable
ADGRE1	9.7079	1.34253	2.8542	0.183827	NA	Stable
ADGRE3	6.1833	6.7508	-0.126683	0.927885	NA	Stable
ADGRE5	38.8443	35.2026	0.142019	0.793323	0.90649	Stable
ADGRF1	1.61882	0.129538	3.6435	0.409022	NA	Stable
ADGRF2	1.6234	0.960829	0.756666	0.785038	NA	Stable
ADGRF3	1.25616	0.820567	0.614322	0.855259	NA	Stable
ADGRF4	4.16298	0.312261	3.73679	0.165185	NA	Stable
ADGRF5	0.444056	0.444056	0	1	NA	Stable
ADGRG1	35.866	38.392	-0.0981851	0.884353	0.951103	Stable
ADGRG2	121.97	71.9198	0.762068	0.082692	0.266185	Stable
ADGRG3	0.1534	0.0803048	0.933744	0.851577	NA	Stable
ADGRG4	5.55124	3.00945	0.883313	0.726231	NA	Stable
ADGRG5	4.51996	0.628411	2.84653	0.266015	NA	Stable
ADGRG6	262.306	413.149	-0.655408	0.00912372	0.0677556	Stable
ADGRG7	1158.55	156.508	2.88801	0.0765849	0.253683	Stable
ADGRL1	8.66164	11.1123	-0.35945	0.727662	NA	Stable
ADGRL2	130.51	117.101	0.15641	0.669889	0.842054	Stable
ADGRL3	22.381	30.3169	-0.437847	0.596377	NA	Stable
ADGRL4	0.750585	0.750585	0	1	NA	Stable
ADGRV1	173.253	266.014	-0.618622	0.132353	0.350848	Stable
ADH1C	4.88474	7.70393	-0.657313	0.7046	NA	Stable
ADH4	4.74608	6.43232	-0.438602	0.779888	NA	Stable
ADH5	3237	2754.26	0.232989	0.226255	0.474622	Stable
ADHFE1	13.3734	7.79063	0.779554	0.435769	NA	Stable
ADI1	36.7591	23.7626	0.629409	0.385398	NA	Stable
ADIG	3.74939	4.03606	-0.106292	0.945002	NA	Stable
ADIPOQ	0.943615	0.943615	0	1	NA	Stable
ADIPOR1	554.437	565.731	-0.0290925	0.889614	0.953719	Stable
ADIPOR2	578.676	554.336	0.0619967	0.7784	0.898819	Stable
ADIRF	0.789239	0.789239	0	1	NA	Stable
ADK	527.661	524.839	0.00773578	0.978904	0.993965	Stable
ADM	172.789	108.573	0.670347	0.0603819	0.220032	Stable
ADM2	0	0	NA	NA	NA	Stable
ADM5	2.96543	2.37999	0.317287	0.892099	NA	Stable
ADNP	474.845	647.803	-0.4481	0.155924	0.38444	Stable
ADNP2	386.778	518.057	-0.421605	0.0941517	0.288976	Stable
ADO	187.292	262.271	-0.485767	0.0997229	0.297774	Stable
ADORA1	1.15261	0.321791	1.84071	0.679911	NA	Stable
ADORA2A	5.71739	1.94657	1.55442	0.419214	NA	Stable
ADORA2B	8.82149	5.7289	0.622762	0.617464	NA	Stable
ADORA3	0	0	NA	NA	NA	Stable
ADPGK	679.992	620.248	0.132671	0.568515	0.777703	Stable
ADPRH	122.05	175.916	-0.527409	0.0922349	0.285357	Stable
ADPRHL1	0.758872	2.16537	-1.51268	0.621579	NA	Stable
ADPRHL2	45.4123	23.1662	0.971059	0.120096	NA	Stable
ADPRM	398.436	462.844	-0.216176	0.340278	0.590356	Stable
ADRA1A	11.2673	4.37394	1.36514	0.242497	NA	Stable
ADRA1B	22.3877	33.429	-0.578393	0.661039	NA	Stable
ADRA1D	0.139588	0.0760947	0.875307	0.86088	NA	Stable
ADRA2A	0	0	NA	NA	NA	Stable
ADRA2B	0	0	NA	NA	NA	Stable
ADRA2C	0	0	NA	NA	NA	Stable
ADRB1	0	0	NA	NA	NA	Stable
ADRB2	7.04808	3.74418	0.912582	0.551614	NA	Stable
ADRB3	0.357876	0.357876	0	1	NA	Stable
ADRM1	6.65261	4.94208	0.428804	0.767517	NA	Stable
ADSL	596.001	444.35	0.423619	0.0620165	0.223149	Stable
ADSS	633.692	630.075	0.00825967	0.974233	0.992319	Stable
ADSSL1	0.684173	2.06673	-1.59492	0.584249	NA	Stable
ADTRP	29.5936	44.2266	-0.579629	0.294229	0.546371	Stable
AEBP1	0	0	NA	NA	NA	Stable
AEBP2	1617.53	2333.83	-0.528903	0.022301	0.118585	Stable
AEN	250.015	296.379	-0.245431	0.37072	0.619679	Stable
AES	5.57861	5.29406	0.0755308	0.958371	NA	Stable
AFAP1	5.58735	2.18055	1.35747	0.393713	NA	Stable
AFAP1L1	0.832188	4.65428	-2.48358	0.254987	NA	Stable
AFAP1L2	414.317	700.292	-0.757222	0.000726239	0.012856	Stable
AFDN	392.322	544.944	-0.474068	0.046451	0.188259	Stable
AFF1	510.222	716.617	-0.490078	0.0179986	0.103316	Stable
AFF2	383.233	550.093	-0.521455	0.179656	0.420691	Stable
AFF3	154.26	168.562	-0.127912	0.793016	0.906381	Stable
AFF4	1251.42	2088.86	-0.739153	0.000358587	0.0078256	Stable
AFG1L	150.215	177.731	-0.242661	0.414821	0.65639	Stable
AFG3L2	602.119	495.888	0.280033	0.658227	0.837359	Stable
AFM	0.307915	0.307915	0	1	NA	Stable
AFMID	77.663	38.7179	1.00423	0.0441559	0.182712	Stable
AFP	1.98491	0.552063	1.84617	0.583214	NA	Stable
AFTPH	1227.54	1433.29	-0.22356	0.243874	0.492997	Stable
AGA	874.845	883.43	-0.0140888	0.949231	0.981067	Stable
AGAP1	69.7469	128.346	-0.879839	0.0219097	0.117462	Stable
AGAP2	3.59459	3.87769	-0.10937	0.94493	NA	Stable
AGAP3	12.2602	31.2181	-1.3484	0.0647943	NA	Stable
AGBL1	119.052	86.9083	0.45403	0.797205	0.907651	Stable
AGBL2	172.578	220.38	-0.352744	0.306558	0.558468	Stable
AGBL3	115.903	153.456	-0.404912	0.258072	0.508127	Stable
AGBL4	70.1239	20.3891	1.78211	0.269488	0.520746	Stable
AGBL5	1613.08	2310.21	-0.51821	0.0282452	0.138756	Stable
AGER	0	0	NA	NA	NA	Stable
AGFG1	1777.75	2825.63	-0.668518	0.0042602	0.0414752	Stable
AGFG2	20.2706	11.9803	0.758719	0.420308	NA	Stable
AGGF1	444.89	679.473	-0.610969	0.00625744	0.0528991	Stable
AGK	390.014	563.109	-0.52989	0.0522614	0.200931	Stable
AGMAT	5.43632	4.78846	0.183068	0.902841	NA	Stable
AGMO	289.269	705.272	-1.28577	0.0994011	0.297347	Stable
AGO1	188.323	202.603	-0.105446	0.713491	0.864433	Stable
AGO2	275.938	181.597	0.603609	0.111388	0.315919	Stable
AGO3	330.972	417.692	-0.335728	0.18267	0.424195	Stable
AGO4	10.2674	13.9453	-0.441712	0.657718	NA	Stable
AGPAT1	6.02913	5.91808	0.0268202	0.987908	NA	Stable
AGPAT2	32.075	20.2028	0.666895	0.397349	NA	Stable
AGPAT3	63.8608	40.8261	0.64544	0.185197	0.42688	Stable
AGPAT4	160.246	97.107	0.722636	0.0515528	0.199604	Stable
AGPAT5	4244.61	5154.94	-0.280322	0.126415	0.341409	Stable
AGPS	1315.74	1968.45	-0.581183	0.00322752	0.0339632	Stable
AGR2	76.832	97.2681	-0.340259	0.610174	0.807126	Stable
AGRN	11.2204	12.2825	-0.130488	0.890065	NA	Stable
AGRP	0	0	NA	NA	NA	Stable
AGT	0	0	NA	NA	NA	Stable
AGTPBP1	575.003	671.308	-0.223406	0.426583	0.666746	Stable
AGTR1	45.1048	27.4913	0.714307	0.354942	0.604655	Stable
AGTR2	0.658651	0.658651	0	1	NA	Stable
AGTRAP	475.561	412.998	0.203496	0.425215	0.665932	Stable
AGXT	0	0	NA	NA	NA	Stable
AGXT2	6.19156	1.77742	1.80052	0.266515	NA	Stable
AHCTF1	2771.34	3323.38	-0.262068	0.253558	0.504488	Stable
AHCY	838.575	1012.63	-0.272096	0.188676	0.430226	Stable
AHCYL1	185.632	201.283	-0.116778	0.684311	0.84846	Stable
AHCYL2	73.3294	57.4669	0.351661	0.428645	0.668493	Stable
AHDC1	1.75267	4.47803	-1.35331	0.49454	NA	Stable
AHI1	631.773	984.767	-0.640376	0.0241862	0.1249	Stable
AHNAK	1102.05	1391.58	-0.336539	0.103041	0.302603	Stable
AHNAK2	0.825865	0.631504	0.387114	0.924935	NA	Stable
AHR	274.22	261.711	0.0673603	0.839316	0.92931	Stable
AHRR	3.54969	3.34045	0.0876494	0.958885	NA	Stable
AHSA1	3113.61	1904.87	0.708892	8.85614e-05	0.00288833	Stable
AHSA2	263.367	283.346	-0.10549	0.703126	0.859491	Stable
AHSG	76.0839	72.9176	0.061324	0.964551	0.988521	Stable
AHSP	6.32126	4.30738	0.553401	0.681386	NA	Stable
AICDA	627.786	251.105	1.32199	2.79444e-05	0.00129171	Up
AIDA	1224.07	1285.1	-0.0701901	0.762192	0.889198	Stable
AIF1	1477.57	2238.48	-0.599294	0.0133366	0.0861301	Stable
AIF1L	101.55	43.6701	1.21747	0.0151616	0.0931428	Stable
AIFM1	585.997	614.755	-0.0691177	0.791677	0.905497	Stable
AIFM2	24.0573	27.1819	-0.176173	0.790505	NA	Stable
AIFM3	1.67371	2.577	-0.622647	0.780903	NA	Stable
AIG1	134.226	110.877	0.275701	0.506518	0.731671	Stable
AIMP1	2565.11	3506.78	-0.451127	0.0343387	0.156086	Stable
AIMP2	221.492	125.04	0.824865	0.402352	0.646682	Stable
AIP	50.4027	24.436	1.04449	0.0657699	0.231407	Stable
AIPL1	19.3591	15.9001	0.283975	0.773154	NA	Stable
AIRE	0.337162	0.0942031	1.8396	0.707126	NA	Stable
AJAP1	6.3917	1.62615	1.97474	0.281587	NA	Stable
AJUBA	85.598	65.1175	0.394531	0.424862	0.665728	Stable
AK1	0.188623	0.188623	0	1	NA	Stable
AK2	1434.93	1120.41	0.35695	0.0740506	0.249383	Stable
AK3	61.8413	32.186	0.94214	0.086008	0.273146	Stable
AK4	983.38	202.624	2.27894	3.86154e-23	1.51128e-19	Up
AK5	12.9397	10.7678	0.265089	0.796868	NA	Stable
AK6	1621.95	1866.49	-0.202597	0.337478	0.587455	Stable
AK7	7.14732	1.75358	2.0271	0.260944	NA	Stable
AK8	1.42125	3.40851	-1.26198	0.565732	NA	Stable
AK9	315.752	89.3427	1.82137	0.017995	0.103316	Stable
AKAIN1	10443.8	9929.26	0.0728822	0.764171	0.889916	Stable
AKAP1	58.9072	18.3483	1.6828	0.0190002	0.10674	Stable
AKAP10	212.662	273.062	-0.360667	0.485686	0.717288	Stable
AKAP11	1913.22	2759.04	-0.528164	0.0139111	0.0885261	Stable
AKAP12	271.794	165.138	0.718843	0.0346908	0.157078	Stable
AKAP13	1543.46	2159.94	-0.484817	0.0223105	0.118585	Stable
AKAP14	50.921	58.845	-0.208658	0.674581	0.844017	Stable
AKAP17A	20.329	39.1666	-0.946082	0.160477	NA	Stable
AKAP17B	981.713	797.115	0.300513	0.248566	0.498449	Stable
AKAP2	63.4747	33.3699	0.927633	0.0972191	0.293763	Stable
AKAP3	77.044	107.415	-0.479442	0.26966	0.520907	Stable
AKAP4	9.13624	4.95584	0.88247	0.544726	NA	Stable
AKAP5	368.602	198.795	0.890787	0.00237511	0.02779	Stable
AKAP6	92.8574	107.25	-0.207885	0.653387	0.834485	Stable
AKAP7	260.93	206.454	0.337844	0.200481	0.44337	Stable
AKAP8	780.53	649.325	0.265514	0.309181	0.560892	Stable
AKAP8L	904.828	774.407	0.224551	0.335932	0.586146	Stable
AKAP9	1986.91	3170.81	-0.674323	0.00035299	0.00774664	Stable
AKIP1	326.647	247.978	0.397522	0.127975	0.343666	Stable
AKIRIN1	118.942	70.267	0.759341	0.0446117	0.183591	Stable
AKIRIN2	10401.4	15784.1	-0.6017	0.0102504	0.0730955	Stable
AKNA	1.87765	5.70571	-1.60348	0.312717	NA	Stable
AKNAD1	9.2699	18.8492	-1.02388	0.345468	NA	Stable
AKR1A1	199.133	67.6083	1.55846	8.76681e-06	0.000553393	Up
AKR1B1	1255.98	1060.72	0.24377	0.321227	0.573508	Stable
AKR1C1	38.2575	7.97175	2.26277	0.166889	NA	Stable
AKR1CL1	760.011	231.198	1.71689	0.0385271	0.16766	Stable
AKR1D1	9.03313	18.9101	-1.06586	0.28144	NA	Stable
AKR1E2	62.3123	43.288	0.52555	0.286275	0.538646	Stable
AKR7A2	107.61	69.1753	0.637485	0.127101	0.342504	Stable
AKT1	17.9099	16.6407	0.10604	0.898252	NA	Stable
AKT1S1	49.1418	29.1223	0.754825	0.21803	0.465167	Stable
AKT2	39.078	64.9149	-0.732193	0.112557	0.318281	Stable
AKT3	4844.87	7082.07	-0.547714	0.0242894	0.125245	Stable
AKTIP	3398.94	5273.09	-0.633565	0.00140115	0.0196246	Stable
ALAD	353.53	290.183	0.284871	0.323429	0.574896	Stable
ALAS2	1.5441	0.955455	0.69251	0.818556	NA	Stable
ALB	299.257	87.2582	1.77802	0.256705	0.507146	Stable
ALCAM	414.582	456.323	-0.138397	0.573684	0.780715	Stable
ALDH16A1	49.9313	51.8028	-0.0530868	0.914364	0.966383	Stable
ALDH18A1	499.831	389.71	0.359039	0.173922	0.412445	Stable
ALDH1A1	5.97686	0.622728	3.26271	0.210443	NA	Stable
ALDH1A2	60.8288	51.9674	0.227146	0.649543	0.832382	Stable
ALDH1A3	15.72	5.60592	1.48757	0.140408	NA	Stable
ALDH1B1	42.4484	35.0125	0.277843	0.62019	0.813841	Stable
ALDH1L1	1.2107	0.978856	0.30667	0.926034	NA	Stable
ALDH1L2	213.882	452.15	-1.07999	5.81148e-05	0.00221534	Down
ALDH2	573.454	354.843	0.692497	0.00268311	0.0300742	Stable
ALDH3A1	4.00766	0.973104	2.04209	0.315302	NA	Stable
ALDH3A2	76.9922	87.6596	-0.1872	0.665593	0.840745	Stable
ALDH3B1	2.381	1.994	0.255901	0.919927	NA	Stable
ALDH4A1	73.2434	56.1272	0.384	0.384916	0.631309	Stable
ALDH5A1	46.9919	29.9719	0.648799	0.283479	0.535672	Stable
ALDH6A1	267.491	427.5	-0.676432	0.00646529	0.054182	Stable
ALDH7A1	1553.6	2244.56	-0.530821	0.00541432	0.0479408	Stable
ALDH8A1	1.99114	2.69652	-0.437504	0.849519	NA	Stable
ALDH9A1	2018.01	1136.22	0.828687	2.10748e-05	0.00104847	Stable
ALDOA	316.903	230.99	0.45621	0.170225	0.406674	Stable
ALDOB	38.9917	53.7778	-0.463845	0.432635	0.672256	Stable
ALDOC	57.2348	32.4963	0.816619	0.257788	0.508127	Stable
ALG1	26.8413	50.6817	-0.917012	0.102379	0.301489	Stable
ALG10	614.948	688.278	-0.162525	0.497898	0.725868	Stable
ALG11	236.999	273.667	-0.20754	0.462338	0.696738	Stable
ALG12	16.7865	19.0795	-0.184721	0.826208	NA	Stable
ALG13	817.055	1103.63	-0.433757	0.031523	0.148341	Stable
ALG14	665.123	571.921	0.217805	0.347965	0.598114	Stable
ALG2	311.339	290.872	0.0981002	0.762773	0.889575	Stable
ALG3	265.997	174.274	0.610057	0.0362245	0.161103	Stable
ALG5	669.242	791.942	-0.242867	0.260792	0.510868	Stable
ALG6	367.127	346.264	0.0844081	0.755535	0.885922	Stable
ALG8	1961.76	1413.46	0.472917	0.0309366	0.146996	Stable
ALG9	315.689	322.536	-0.0309561	0.906602	0.961942	Stable
ALK	48.3478	127.999	-1.40461	0.00520755	0.0468258	Down
ALKAL1	15.9624	6.07268	1.39427	0.187337	NA	Stable
ALKAL2	4.54544	5.82213	-0.357128	0.8029	NA	Stable
ALKBH1	288.655	213.501	0.435108	0.126462	0.341409	Stable
ALKBH2	109.083	149.713	-0.456774	0.253726	0.504488	Stable
ALKBH3	359.462	298.28	0.26917	0.294514	0.546371	Stable
ALKBH4	6.20554	4.26225	0.541943	0.716438	NA	Stable
ALKBH5	188.467	184.818	0.0282027	0.924291	0.970758	Stable
ALKBH6	27.0126	35.0182	-0.374473	0.534436	NA	Stable
ALKBH7	275.135	248.286	0.148135	0.679936	0.846567	Stable
ALKBH8	251.617	173.443	0.536765	0.099258	0.297217	Stable
ALLC	1.39526	2.00899	-0.52593	0.860358	NA	Stable
ALMS1	1333.85	1839	-0.463325	0.0395417	0.17037	Stable
ALOX12	30.5757	36.7729	-0.266257	0.662583	NA	Stable
ALOX12B	0.098935	2.11678	-4.41925	0.233736	NA	Stable
ALOX15	10.4781	16.3034	-0.637793	0.668783	NA	Stable
ALOX5	11.9931	8.25082	0.539594	0.589002	NA	Stable
ALOX5AP	5.72115	1.54132	1.89214	0.420282	NA	Stable
ALOXE3	7.11387	10.3949	-0.547172	0.7545	NA	Stable
ALPK1	43.1306	66.3634	-0.621676	0.198494	0.441287	Stable
ALPK2	34.0946	178.014	-2.38437	0.00302972	0.0327852	Down
ALPK3	3.44855	4.43665	-0.363482	0.827108	NA	Stable
ALPL	42.6553	24.9189	0.775486	0.218741	NA	Stable
ALS2	477.436	782.374	-0.712552	0.0148489	0.0921465	Stable
ALS2CL	0.139588	0.0760947	0.875307	0.86088	NA	Stable
ALS2CR12	1.08015	0.186839	2.53136	0.602021	NA	Stable
ALX1	449.051	812.284	-0.855105	0.0752301	0.252077	Stable
ALX3	0.109775	0.109775	0	1	NA	Stable
ALX4	1.90019	0.498022	1.93186	0.538411	NA	Stable
ALYREF	196.626	168.744	0.220616	0.502638	0.728446	Stable
AMACR	195.012	204.524	-0.0687057	0.815495	0.915683	Stable
AMBN	1.86003	1.86003	0	1	NA	Stable
AMBP	9.09016	1.24005	2.87391	0.172311	NA	Stable
AMBRA1	158.86	141.369	0.16829	0.671258	0.842553	Stable
AMCF-II	3.17922	2.06213	0.624542	0.794864	NA	Stable
AMD1	4160.02	3803.42	0.129293	0.433094	0.672715	Stable
AMDHD1	3.95271	3.04418	0.376787	0.873473	NA	Stable
AMDHD2	38.7196	55.1104	-0.509263	0.379318	0.627874	Stable
AMELX	0.827796	0.231292	1.83956	0.707132	NA	Stable
AMER1	58.7655	71.1331	-0.275553	0.569041	0.777721	Stable
AMER2	14.966	20.479	-0.452453	0.542375	NA	Stable
AMER3	2.87918	1.56387	0.880538	0.759098	NA	Stable
AMFR	518.923	1047.93	-1.01395	5.17255e-06	0.000363658	Down
AMH	0.11398	0.495961	-2.12144	0.669946	NA	Stable
AMHR2	2.02293	0.878964	1.20257	0.67818	NA	Stable
AMIGO1	16.9936	19.2709	-0.181436	0.816562	NA	Stable
AMIGO2	29.0299	11.7433	1.3057	0.104687	NA	Stable
AMMECR1	762.711	1502.76	-0.978403	3.78121e-05	0.00160271	Stable
AMMECR1L	510.96	613.763	-0.264471	0.225743	0.473892	Stable
AMN	1.86369	1.02215	0.866555	0.751049	NA	Stable
AMN1	374.175	478.616	-0.355155	0.134187	0.353487	Stable
AMOT	1128.18	1547.37	-0.455817	0.0440828	0.182631	Stable
AMOTL1	24.0849	22.065	0.12637	0.857671	NA	Stable
AMOTL2	299.814	655.984	-1.12959	1.08695e-05	0.00066124	Down
AMPD1	8.84017	12.5864	-0.509716	0.611941	NA	Stable
AMPD2	18.8211	13.4005	0.490066	0.602091	NA	Stable
AMPD3	445.575	697.895	-0.64734	0.00626265	0.0528991	Stable
AMPH	76.8852	89.8727	-0.225178	0.562548	0.774177	Stable
AMT	988.813	1501.35	-0.602491	0.0273493	0.136005	Stable
AMTN	25.8535	1.88708	3.77613	0.00535754	NA	Stable
AMY2	75.1111	53.6456	0.485566	0.300777	0.552739	Stable
AMZ1	0.213603	0.213603	0	1	NA	Stable
AMZ2	696.754	415.983	0.744123	0.000683749	0.0122971	Stable
ANAPC1	591.039	651.18	-0.139803	0.529516	0.749795	Stable
ANAPC10	371.056	543.515	-0.550684	0.0191889	0.10754	Stable
ANAPC11	277.211	236.683	0.228024	0.418058	0.659202	Stable
ANAPC13	768.985	1345.45	-0.807055	0.000140275	0.00394013	Stable
ANAPC15	945.286	649.517	0.541385	0.0104453	0.0739229	Stable
ANAPC16	441.075	513.399	-0.219057	0.348651	0.598642	Stable
ANAPC2	18.0893	19.327	-0.0954854	0.902978	NA	Stable
ANAPC4	226.335	287.479	-0.344993	0.17307	0.411506	Stable
ANAPC5	179.91	107.586	0.741784	0.0147298	0.0916493	Stable
ANAPC7	3808.97	3526.68	0.111088	0.54013	0.756462	Stable
ANG	454.925	295.066	0.624593	0.0473658	0.190518	Stable
ANGEL1	50.1216	57.3635	-0.1947	0.687908	0.85063	Stable
ANGEL2	1101.82	1260.25	-0.193812	0.339859	0.589997	Stable
ANGPT1	176.814	337.833	-0.934081	0.000589394	0.0111077	Stable
ANGPT2	126.886	136.377	-0.104064	0.760141	0.887864	Stable
ANGPT4	0.0943113	0.0943113	0	1	NA	Stable
ANGPTL1	106.768	83.6139	0.352664	0.392644	0.638155	Stable
ANGPTL2	7.51862	10.6598	-0.503645	0.785796	NA	Stable
ANGPTL3	3.25377	10.489	-1.68869	0.165567	NA	Stable
ANGPTL4	2.01734	0.392919	2.36015	0.467711	NA	Stable
ANGPTL5	4.36716	4.36716	0	1	NA	Stable
ANGPTL6	3.06222	7.35527	-1.2642	0.382728	NA	Stable
ANGPTL7	0.114498	0.498214	-2.12144	0.669946	NA	Stable
ANGPTL8	0	0	NA	NA	NA	Stable
ANK1	1.53615	0.835768	0.878148	0.79578	NA	Stable
ANK2	941.262	1557.8	-0.726847	0.00947556	0.0695188	Stable
ANK3	135.771	170.916	-0.332118	0.400763	0.645099	Stable
ANKAR	19.0543	18.929	0.00951888	0.990097	NA	Stable
ANKDD1A	9.88252	15.8336	-0.680037	0.475017	NA	Stable
ANKDD1B	246.601	443.175	-0.845699	0.0146017	0.0914101	Stable
ANKEF1	320.057	83.9264	1.93113	0.00284909	0.0313507	Up
ANKFN1	0.510758	5.94432	-3.5408	0.156091	NA	Stable
ANKFY1	397.511	403.805	-0.022665	0.925457	0.97101	Stable
ANKH	81.0499	108.786	-0.424609	0.266434	0.517058	Stable
ANKHD1	955.824	1570.61	-0.716511	0.000213643	0.00540599	Stable
ANKIB1	810.051	991.726	-0.291929	0.155152	0.382939	Stable
ANKLE1	16.5831	9.04962	0.873788	0.339031	NA	Stable
ANKLE2	905.855	1203.36	-0.40972	0.0391364	0.169308	Stable
ANKMY1	2.0109	0.187568	3.42236	0.368473	NA	Stable
ANKMY2	1239.28	1058.61	0.227325	0.280626	0.532283	Stable
ANKRA2	285.035	298.901	-0.0685305	0.782405	0.901316	Stable
ANKRD1	17.6864	8.832	1.00183	0.2933	NA	Stable
ANKRD10	54.166	93.5312	-0.788061	0.0618666	0.223149	Stable
ANKRD11	35.0831	76.2509	-1.11998	0.0225304	0.119643	Stable
ANKRD12	1332.2	2067.1	-0.633799	0.000727524	0.012856	Stable
ANKRD13A	947.382	1214.92	-0.35884	0.0748994	0.251399	Stable
ANKRD13B	2.08736	0.388144	2.42701	0.480803	NA	Stable
ANKRD13C	334.237	526.01	-0.654219	0.0061797	0.0524626	Stable
ANKRD13D	1.22611	2.26534	-0.885637	0.732	NA	Stable
ANKRD16	28.9608	34.0621	-0.234066	0.721085	NA	Stable
ANKRD17	561.596	785.612	-0.484285	0.0156007	0.0950042	Stable
ANKRD22	68.2765	102.237	-0.582451	0.707786	0.862513	Stable
ANKRD23	0.306511	0.438945	-0.518098	0.917235	NA	Stable
ANKRD24	3.56589	2.07312	0.782456	0.690837	NA	Stable
ANKRD27	307.575	525.684	-0.773257	0.00267756	0.0300742	Stable
ANKRD28	658.684	825.711	-0.32605	0.154905	0.382732	Stable
ANKRD29	170.421	110.832	0.62073	0.0736391	0.24857	Stable
ANKRD31	744.438	571.599	0.381148	0.182367	0.423925	Stable
ANKRD33	0.109775	0.109775	0	1	NA	Stable
ANKRD33B	139.125	85.3449	0.705	0.0770792	0.254782	Stable
ANKRD34A	7.00641	3.79578	0.88428	0.716466	NA	Stable
ANKRD34B	26.405	16.3551	0.69107	0.398529	NA	Stable
ANKRD34C	6.13547	13.1472	-1.09951	0.408132	NA	Stable
ANKRD35	7.81614	3.19059	1.29263	0.373638	NA	Stable
ANKRD37	536.074	643.319	-0.263104	0.242058	0.491034	Stable
ANKRD39	42.5759	43.1555	-0.019506	0.969523	0.990788	Stable
ANKRD40	171.221	253.848	-0.568111	0.0981265	0.295487	Stable
ANKRD42	761.545	851.501	-0.161079	0.444768	0.681407	Stable
ANKRD44	632.923	1046.35	-0.725265	0.00060935	0.0113803	Stable
ANKRD46	265.384	254.67	0.0594515	0.822049	0.920084	Stable
ANKRD49	797.123	577.722	0.464425	0.0258586	0.130805	Stable
ANKRD50	1627.85	2565.83	-0.656461	0.000474703	0.00949486	Stable
ANKRD52	27.8536	24.489	0.185726	0.814003	NA	Stable
ANKRD53	1.01134	1.4372	-0.506988	0.871532	NA	Stable
ANKRD54	25.8507	40.8126	-0.658812	0.252054	NA	Stable
ANKRD55	9.6747	4.01736	1.26797	0.316492	NA	Stable
ANKRD6	315.021	333.043	-0.0802629	0.781828	0.901102	Stable
ANKRD60	0.139588	0.0760947	0.875307	0.86088	NA	Stable
ANKRD61	1.22754	1.84482	-0.587708	0.827163	NA	Stable
ANKRD63	27.4124	27.1555	0.0135844	0.982992	NA	Stable
ANKRD65	2.18096	1.03941	1.0692	0.735117	NA	Stable
ANKRD66	0.985182	0.698509	0.496112	0.899227	NA	Stable
ANKRD7	2.0146	2.6665	-0.404453	0.866958	NA	Stable
ANKRD9	5.16025	7.26042	-0.492611	0.699372	NA	Stable
ANKS1A	94.2389	137.641	-0.546515	0.184835	0.426704	Stable
ANKS1B	2007.48	2594.3	-0.369959	0.343852	0.594044	Stable
ANKS3	9.52576	7.60488	0.324908	0.778178	NA	Stable
ANKS4B	856.092	534.611	0.679277	0.120785	0.332661	Stable
ANKS6	10.3302	10.6384	-0.0424063	0.964716	NA	Stable
ANKUB1	0.499697	3.84995	-2.94571	0.233653	NA	Stable
ANKZF1	38.0648	39.6761	-0.0598135	0.923606	0.970758	Stable
ANLN	2766.63	4274.15	-0.627508	0.00341612	0.0352758	Stable
ANO1	7.48298	1.66927	2.1644	0.16833	NA	Stable
ANO10	126.016	154.727	-0.29612	0.381233	0.628784	Stable
ANO2	3.74068	0.411328	3.18494	0.24033	NA	Stable
ANO3	16.191	6.65778	1.28208	0.411988	NA	Stable
ANO4	1627.25	1251.22	0.3791	0.291902	0.543874	Stable
ANO5	345.942	378.645	-0.130315	0.629071	0.818657	Stable
ANO6	1795.31	3324.36	-0.888841	2.2506e-06	0.000192878	Stable
ANO7	5.64278	6.19359	-0.134369	0.925199	NA	Stable
ANO8	5.6504	2.42399	1.22097	0.425562	NA	Stable
ANO9	0.141929	1.13645	-3.00129	0.483311	NA	Stable
ANOS1	10.7623	10.8883	-0.0167819	0.989327	NA	Stable
ANP32A	221.533	245.032	-0.145447	0.618396	0.812731	Stable
ANP32B	2390.67	3366.99	-0.494045	0.00838584	0.0641421	Stable
ANP32E	2164.46	2237.77	-0.0480522	0.787496	0.904077	Stable
ANPEP	1.22737	1.55388	-0.340303	0.913797	NA	Stable
ANTXR1	2.61745	5.23685	-1.00054	0.554373	NA	Stable
ANTXR2	60.9745	31.4095	0.957005	0.290591	0.543025	Stable
ANTXRL	0.801126	0.138574	2.53138	0.602018	NA	Stable
ANXA1	5917	9416.89	-0.670386	0.00361708	0.0368008	Stable
ANXA10	5.47679	5.2052	0.073377	0.961626	NA	Stable
ANXA11	285.017	435.976	-0.613197	0.0226039	0.119978	Stable
ANXA13	6.5504	0.634856	3.36708	0.104772	NA	Stable
ANXA2	10192.7	10401.7	-0.029273	0.869962	0.943577	Stable
ANXA2R	0.0943113	0.0943113	0	1	NA	Stable
ANXA3	3.03926	4.23408	-0.478329	0.779843	NA	Stable
ANXA4	1534.57	1043.95	0.55578	0.0151999	0.0932402	Stable
ANXA5	1061.54	927.649	0.194508	0.383124	0.629989	Stable
ANXA6	118.781	137.801	-0.214288	0.576544	0.782406	Stable
ANXA7	904.432	728.871	0.311349	0.12796	0.343666	Stable
ANXA8	18.0965	24.6201	-0.444125	0.544495	NA	Stable
ANXA9	204.82	193.721	0.080379	0.778908	0.899006	Stable
AOAH	51.1866	23.6059	1.11662	0.0573044	0.213717	Stable
AOC1	2.20562	1.03893	1.08608	0.69026	NA	Stable
AOC2	4.26914	4.08734	0.0627827	0.969153	NA	Stable
AOX1	42.9137	10.3468	2.05225	0.0058442	NA	Stable
AOX2	64.8922	32.1065	1.01518	0.192416	0.434119	Stable
AOX4	2.14219	0.749744	1.51462	0.609224	NA	Stable
AP1AR	483.46	692.049	-0.51748	0.0287296	0.140073	Stable
AP1B1	190.088	257.937	-0.440346	0.129228	0.345462	Stable
AP1G1	911.389	1028.42	-0.174298	0.400003	0.644319	Stable
AP1G2	31.5333	55.1748	-0.807134	0.125902	0.341272	Stable
AP1M1	10.9495	13.6259	-0.315484	0.761894	NA	Stable
AP1M2	282.326	248.735	0.182753	0.547396	0.762212	Stable
AP1S1	23.9733	16.105	0.57392	0.503053	NA	Stable
AP1S2	3736.85	3140.35	0.250898	0.18431	0.42611	Stable
AP1S3	58.3003	23.3102	1.32254	0.0302512	0.145116	Stable
AP2A1	2.99118	2.77345	0.109034	0.955425	NA	Stable
AP2A2	118.022	170.411	-0.529961	0.136714	0.357735	Stable
AP2B1	2138.54	2792.53	-0.384945	0.0579442	0.214738	Stable
AP2M1	1646.35	1138.79	0.531772	0.0165065	0.0981363	Stable
AP2S1	153.094	98.2647	0.639673	0.0588113	0.216935	Stable
AP3B1	1510.24	1972.14	-0.384982	0.0504312	0.197634	Stable
AP3B2	65.838	38.9902	0.755809	0.171848	0.409422	Stable
AP3D1	941.524	1273.95	-0.436238	0.0349083	0.157698	Stable
AP3M1	3777.49	4080.95	-0.111475	0.578577	0.783967	Stable
AP3M2	15.169	16.2354	-0.0980158	0.916477	NA	Stable
AP3S1	2729.45	2583.2	0.0794494	0.645816	0.829961	Stable
AP3S2	162.569	117.744	0.465393	0.137043	0.358278	Stable
AP4B1	122.623	133.961	-0.127585	0.721747	0.867153	Stable
AP4E1	411.938	513.285	-0.317335	0.183574	0.425201	Stable
AP4M1	24.8824	19.4852	0.352748	0.613272	NA	Stable
AP4S1	582.524	765.574	-0.394225	0.0676985	0.235605	Stable
AP5B1	1.1661	3.81701	-1.71075	0.414388	NA	Stable
AP5M1	1111.23	896.427	0.309895	0.134588	0.353908	Stable
AP5S1	11.7011	8.04658	0.540201	0.594944	NA	Stable
AP5Z1	48.5972	51.6506	-0.0879134	0.879275	0.948422	Stable
APAF1	586.281	1036.74	-0.822396	0.00131953	0.0188016	Stable
APBA1	105.572	536.402	-2.34508	0.0475522	0.190875	Stable
APBA2	3.19309	1.23064	1.37555	0.574178	NA	Stable
APBA3	21.6086	18.6262	0.214279	0.770834	NA	Stable
APBB1	0.29579	0.161248	0.875289	0.860882	NA	Stable
APBB1IP	22.93	27.6561	-0.27036	0.699942	NA	Stable
APBB2	310.506	442.138	-0.509876	0.0495675	0.195753	Stable
APBB3	559.685	404.74	0.467619	0.0482719	0.192714	Stable
APC	354.466	434.092	-0.292353	0.231368	0.479691	Stable
APC2	2.37423	0.470178	2.33618	0.442181	NA	Stable
APCDD1	2.56256	3.54282	-0.467309	0.809435	NA	Stable
APCDD1L	0.527035	0.141904	1.89299	0.698801	NA	Stable
APCS	5.14277	0.702899	2.87116	0.222912	NA	Stable
APEH	178.489	177.623	0.00701772	0.982035	0.995087	Stable
APELA	934.956	936.802	-0.00284533	0.991316	0.999083	Stable
APEX1	2183.81	1864.38	0.228156	0.27692	0.528467	Stable
APEX2	378.366	270.956	0.481721	0.0720823	0.245381	Stable
APH1A	529.103	637.701	-0.269332	0.286443	0.538808	Stable
APH1B	1269.21	769.781	0.721412	0.0110616	0.0766675	Stable
API5	1002.27	871.552	0.201611	0.308168	0.559988	Stable
APIP	759.363	789.586	-0.0563064	0.797478	0.907651	Stable
APITD1	584.515	531.292	0.137735	0.604501	0.802243	Stable
APLF	868.946	934.442	-0.104838	0.637533	0.824336	Stable
APLN	0.569295	0.569295	0	1	NA	Stable
APLNR	0.238584	0.238584	0	1	NA	Stable
APLP1	7.75784	4.58219	0.759619	0.571658	NA	Stable
APLP2	884.26	1372.32	-0.63408	0.00106321	0.0161282	Stable
APMAP	62.3664	89.7778	-0.525591	0.204387	0.44846	Stable
APOA1	293.269	112.875	1.3775	0.000453522	0.00918069	Up
APOA2	2053.53	4187.88	-1.02811	8.22648e-07	9.28723e-05	Down
APOA4	0.354059	0.0953288	1.89301	0.698798	NA	Stable
APOA5	0	0	NA	NA	NA	Stable
APOB	53.5652	29.9336	0.83953	0.35152	0.602219	Stable
APOBEC1	32.1137	7.06761	2.1839	0.0406411	NA	Stable
APOBEC2	121.544	145.758	-0.262096	0.401196	0.645531	Stable
APOBEC3B	2.62028	2.12977	0.29902	0.886082	NA	Stable
APOBEC4	12.0383	13.4217	-0.156937	0.863893	NA	Stable
APOBR	2.96004	8.45882	-1.51484	0.295641	NA	Stable
APOC2	3.29287	0.978087	1.75131	0.501576	NA	Stable
APOC3	53.7075	19.1566	1.48728	0.0135472	0.0871072	Stable
APOC4	0	0	NA	NA	NA	Stable
APOD	18.587	2.52736	2.87859	0.123989	NA	Stable
APOE	8.71779	11.0717	-0.34484	0.748827	NA	Stable
APOF	38.8578	46.5646	-0.261029	0.621577	0.814085	Stable
APOH	2.45154	1.33404	0.877884	0.800415	NA	Stable
APOLD1	11.1747	6.47289	0.787757	0.480262	NA	Stable
APOM	13.7039	30.4691	-1.15276	0.141194	NA	Stable
APOO	1337.54	1721.05	-0.363709	0.0579598	0.214738	Stable
APOOL	1680.89	2776.55	-0.724067	0.000859407	0.014272	Stable
APOPT1	313.203	221.795	0.497869	0.0607704	0.220966	Stable
APP	127.746	100.281	0.349225	0.463618	0.697836	Stable
APPBP2	1123.7	1384.79	-0.301406	0.126275	0.341409	Stable
APPL1	735.826	774.054	-0.0730708	0.751537	0.884148	Stable
APPL2	1625.75	2654.6	-0.707395	0.000326279	0.00735287	Stable
APRT	182.235	181.121	0.00884166	0.978409	0.993856	Stable
APTX	566.345	585.81	-0.0487513	0.827379	0.923496	Stable
AQN-1	0.48271	0.48271	0	1	NA	Stable
AQP1	1.77682	0.356039	2.31919	0.526035	NA	Stable
AQP10	0.601813	2.59431	-2.10796	0.436507	NA	Stable
AQP11	24.7079	19.2947	0.356771	0.633511	NA	Stable
AQP2	2.29888	2.29888	0	1	NA	Stable
AQP3	13.9026	2.58047	2.42964	0.0511985	NA	Stable
AQP4	0.496199	2.10398	-2.08413	0.555342	NA	Stable
AQP5	0	0	NA	NA	NA	Stable
AQP6	4.04642	15.8917	-1.97355	0.386853	NA	Stable
AQP7	1.60599	0.17426	3.20415	0.387836	NA	Stable
AQP8	0.792141	0.106634	2.89308	0.549906	NA	Stable
AQP9	73.8427	41.2356	0.840565	0.568642	0.777703	Stable
AQR	629.806	665.226	-0.0789386	0.712317	0.864433	Stable
AR	0.35113	0.35113	0	1	NA	Stable
ARAF	35.8304	46.1943	-0.36653	0.474887	0.707659	Stable
ARAP1	15.2791	22.8309	-0.579426	0.455313	NA	Stable
ARAP2	1287.49	1879.26	-0.545611	0.0213845	0.115917	Stable
ARAP3	1.00874	8.08081	-3.00195	0.0969906	NA	Stable
ARC	1.1989	0.810855	0.564191	0.881154	NA	Stable
ARCN1	2736.59	2871.14	-0.0692399	0.720247	0.866476	Stable
AREG	24.4917	7.97322	1.61906	0.111965	NA	Stable
AREL1	169.983	184.354	-0.117086	0.695659	0.854813	Stable
ARF1	6863.79	4503.54	0.607945	0.000801166	0.0136722	Stable
ARF2	89.6027	119.185	-0.411585	0.234034	0.482322	Stable
ARF3	325.959	443.123	-0.443019	0.109929	0.31414	Stable
ARF4	5007.22	4585.31	0.126992	0.498233	0.726077	Stable
ARF5	65.4648	47.2153	0.471463	0.361724	0.611872	Stable
ARF6	853.418	1256.02	-0.557541	0.00812574	0.0630016	Stable
ARFGAP1	5.81634	5.3277	0.126599	0.924141	NA	Stable
ARFGAP2	117.096	86.4478	0.437792	0.241831	0.490836	Stable
ARFGAP3	250.249	353.413	-0.497993	0.0681746	0.236746	Stable
ARFGEF1	1246.77	1423.78	-0.19153	0.368214	0.617666	Stable
ARFGEF2	507.818	778.268	-0.615956	0.00268698	0.0300742	Stable
ARFGEF3	294.134	151.013	0.961802	0.16803	0.403915	Stable
ARFIP1	2372.96	3182.93	-0.42367	0.015854	0.0959494	Stable
ARFIP2	39.6613	24.8804	0.672723	0.272194	NA	Stable
ARFRP1	12.8443	6.33313	1.02014	0.34473	NA	Stable
ARG1	5785.23	7102.21	-0.295893	0.574404	0.781017	Stable
ARG2	724.72	791.459	-0.127091	0.53276	0.751569	Stable
ARGFX	76.6738	10.6535	2.8474	3.47346e-06	0.000270078	Up
ARGLU1	418.438	554.562	-0.406336	0.0620055	0.223149	Stable
ARHGAP1	397.686	376.312	0.0796985	0.753357	0.884959	Stable
ARHGAP10	922.671	826.939	0.158035	0.526004	0.747767	Stable
ARHGAP11A	2251	2218.66	0.020881	0.920756	0.969781	Stable
ARHGAP12	974.929	1849.52	-0.923783	7.52693e-06	0.000496836	Stable
ARHGAP15	33.7529	33.7529	0	1	NA	Stable
ARHGAP17	56.866	77.5636	-0.447814	0.287149	0.539771	Stable
ARHGAP18	10843.3	16010.7	-0.562225	0.000629567	0.0116288	Stable
ARHGAP20	19.1088	64.4737	-1.75448	0.081714	0.264008	Stable
ARHGAP21	910.293	1899.41	-1.06115	2.46072e-06	0.000206367	Down
ARHGAP22	117.882	103.11	0.193163	0.814765	0.915597	Stable
ARHGAP23	1.80805	1.47493	0.293788	0.92023	NA	Stable
ARHGAP24	50.4076	32.8504	0.617731	0.404293	0.648277	Stable
ARHGAP25	4.03687	0.717847	2.49149	0.325282	NA	Stable
ARHGAP26	187.032	169.806	0.139392	0.71299	0.864433	Stable
ARHGAP27	66.7057	71.5263	-0.100665	0.839624	0.929564	Stable
ARHGAP28	107.104	100.826	0.0871468	0.833574	0.926664	Stable
ARHGAP29	2748.76	4443.19	-0.692813	0.00190225	0.023821	Stable
ARHGAP30	2.40997	1.87613	0.361255	0.872626	NA	Stable
ARHGAP31	46.4102	38.9169	0.254047	0.652229	0.83382	Stable
ARHGAP32	133.908	231.199	-0.787893	0.00907453	0.0675422	Stable
ARHGAP33	2.31812	5.06686	-1.12814	0.566905	NA	Stable
ARHGAP35	609.695	851.327	-0.481626	0.0593828	0.217851	Stable
ARHGAP36	11.4632	25.2777	-1.14085	0.194746	NA	Stable
ARHGAP39	2.09966	1.14999	0.868536	0.749151	NA	Stable
ARHGAP4	0	0	NA	NA	NA	Stable
ARHGAP42	2268.12	1683.52	0.430012	0.0490718	0.194712	Stable
ARHGAP44	54.1421	102.415	-0.919601	0.0406793	0.173277	Stable
ARHGAP45	0.554298	0.406841	0.446197	0.927256	NA	Stable
ARHGAP5	1546.86	2227.49	-0.526072	0.0151681	0.0931428	Stable
ARHGAP6	16.2612	17.2908	-0.0885761	0.925104	NA	Stable
ARHGAP8	120.933	83.8142	0.528941	0.18132	0.42248	Stable
ARHGAP9	19.9816	93.3387	-2.22381	0.000268497	0.00634449	Down
ARHGDIA	28.8198	20.9476	0.460276	0.52222	NA	Stable
ARHGDIB	0.224105	0.362935	-0.69554	0.888798	NA	Stable
ARHGDIG	0.442671	0.442671	0	1	NA	Stable
ARHGEF1	5.58844	5.00738	0.15839	0.914652	NA	Stable
ARHGEF10	16.7727	8.40462	0.996861	0.386181	NA	Stable
ARHGEF10L	2.21866	1.60008	0.471543	0.824627	NA	Stable
ARHGEF11	38.0397	48.5642	-0.352389	0.593249	0.794858	Stable
ARHGEF12	223.051	435.237	-0.964427	0.000101421	0.00318391	Stable
ARHGEF15	2.37181	0.421143	2.4936	0.412614	NA	Stable
ARHGEF16	2.85091	2.54119	0.165919	0.933794	NA	Stable
ARHGEF17	3.02456	0.788527	1.93949	0.422164	NA	Stable
ARHGEF18	135.354	135.152	0.00214804	0.994912	1	Stable
ARHGEF19	1.24389	0.334965	1.89277	0.587844	NA	Stable
ARHGEF2	3.06124	5.26695	-0.78285	0.620349	NA	Stable
ARHGEF25	1.17243	1.17243	0	1	NA	Stable
ARHGEF26	284.587	364.83	-0.358351	0.189093	0.43026	Stable
ARHGEF28	36.8383	12.4022	1.57061	0.231757	NA	Stable
ARHGEF3	55.021	45.21	0.283342	0.61774	0.812531	Stable
ARHGEF33	139.125	89.0391	0.643872	0.246082	0.495329	Stable
ARHGEF37	23.3041	33.4289	-0.520509	0.448417	NA	Stable
ARHGEF38	72.524	96.3169	-0.40933	0.472099	0.705743	Stable
ARHGEF39	88.6603	67.0271	0.403543	0.347199	0.59722	Stable
ARHGEF4	209.803	209.018	0.00540799	0.985844	0.997505	Stable
ARHGEF40	4.19038	1.21133	1.7905	0.385592	NA	Stable
ARHGEF5	88.6415	130.65	-0.559651	0.0959439	0.291651	Stable
ARHGEF6	50.9549	24.5847	1.05146	0.0945136	0.289357	Stable
ARHGEF7	170.976	252.613	-0.563134	0.12026	0.331989	Stable
ARHGEF9	15.251	32.3923	-1.08675	0.291971	NA	Stable
ARID1A	881.573	1171.75	-0.410512	0.0695457	0.239805	Stable
ARID1B	185.627	316.223	-0.768536	0.00265035	0.0298922	Stable
ARID2	1377.27	1877.11	-0.446711	0.0274857	0.136337	Stable
ARID3A	81.1343	165.679	-1.03001	0.00338836	0.0350818	Down
ARID3B	100.31	122.825	-0.292141	0.424081	0.664992	Stable
ARID3C	418.402	397.835	0.0727207	0.763908	0.889916	Stable
ARID4A	8110.22	9090.22	-0.164574	0.345899	0.596359	Stable
ARID4B	739.47	1333.27	-0.850403	6.75522e-05	0.00245551	Stable
ARID5A	3.47299	5.2736	-0.602612	0.714222	NA	Stable
ARID5B	175.345	287.743	-0.714586	0.00619165	0.0525261	Stable
ARIH1	1204.61	1595.24	-0.405212	0.0458668	0.186975	Stable
ARIH2	926.67	627.4	0.56267	0.0146057	0.0914101	Stable
ARIH2OS	72.1262	52.445	0.459719	0.441782	0.679366	Stable
ARL1	3148.2	3707.04	-0.23574	0.166186	0.401322	Stable
ARL10	85.0595	87.5357	-0.0413992	0.913272	0.966004	Stable
ARL11	0.896244	0.896244	0	1	NA	Stable
ARL13A	0.345589	1.76863	-2.3555	0.540831	NA	Stable
ARL13B	170.308	179.986	-0.079736	0.790355	0.905108	Stable
ARL14	10.4762	3.73649	1.48736	0.232013	NA	Stable
ARL14EP	3540.38	5210.66	-0.557563	0.00770578	0.0611721	Stable
ARL14EPL	1743.03	2528.27	-0.536554	0.0198327	0.10989	Stable
ARL15	5758.33	6237.69	-0.115359	0.581508	0.786396	Stable
ARL16	35.9908	49.3946	-0.456725	0.397522	0.641554	Stable
ARL2	48.1194	34.1703	0.493875	0.361023	0.610939	Stable
ARL2BP	708.412	481.655	0.556588	0.0229934	0.121241	Stable
ARL3	46.0948	52.3223	-0.182822	0.715076	0.864646	Stable
ARL4A	3739.89	3827.93	-0.0335707	0.862149	0.939445	Stable
ARL4C	194.433	150.405	0.370423	0.28044	0.532017	Stable
ARL4D	21.6861	18.3599	0.240215	0.793405	NA	Stable
ARL5A	2658.02	3578.97	-0.429189	0.0303332	0.145305	Stable
ARL5B	1186.04	1501.86	-0.340605	0.110459	0.314629	Stable
ARL6	378.644	320.173	0.241992	0.464724	0.698634	Stable
ARL6IP1	16324.1	11794.5	0.46889	0.01189	0.0804881	Stable
ARL6IP4	70.0738	75.9084	-0.115384	0.798172	0.907812	Stable
ARL6IP5	385.894	484.188	-0.327364	0.177541	0.418324	Stable
ARL6IP6	1063.45	1392.91	-0.389349	0.0458349	0.186975	Stable
ARL8A	10.0911	9.53063	0.0824413	0.938195	NA	Stable
ARL8B	4314.94	4424.29	-0.0361055	0.832286	0.92598	Stable
ARL9	16.2105	21.9945	-0.440212	0.596914	NA	Stable
ARMC1	5789.01	8006.48	-0.467853	0.00426918	0.0415282	Stable
ARMC10	818.143	808.467	0.0171635	0.930058	0.972344	Stable
ARMC12	29.5672	9.18252	1.68704	0.0614622	NA	Stable
ARMC2	831.917	924.087	-0.151588	0.513939	0.737582	Stable
ARMC3	19.5877	25.9554	-0.406084	0.542263	NA	Stable
ARMC4	293.984	252.167	0.22136	0.569406	0.778005	Stable
ARMC5	6.97004	10.4221	-0.5804	0.687257	NA	Stable
ARMC6	18.8509	23.3729	-0.310207	0.695191	NA	Stable
ARMC7	1015.87	744.369	0.448626	0.0265329	0.133073	Stable
ARMC8	1260.36	1497.93	-0.249127	0.196737	0.439309	Stable
ARMC9	28.6606	23.1509	0.308	0.632618	NA	Stable
ARMCX1	45.5329	47.7907	-0.0698205	0.896537	0.957279	Stable
ARMCX2	3.63974	1.42266	1.35525	0.536382	NA	Stable
ARMCX3	0.896243	0.469198	0.933695	0.851585	NA	Stable
ARMCX4	59.3552	60.4262	-0.0257984	0.954136	0.983453	Stable
ARMCX5	158.97	143.932	0.143368	0.683079	0.847884	Stable
ARMT1	421.967	447.995	-0.0863523	0.726829	0.870029	Stable
ARNT	53.0553	62.9615	-0.246971	0.619388	0.813631	Stable
ARNT2	3.17957	0.5909	2.42785	0.460971	NA	Stable
ARNTL	164.012	222.299	-0.438698	0.124928	0.339691	Stable
ARNTL2	359.825	218.203	0.721625	0.0131691	0.0852916	Stable
ARPC1A	1123.61	1010.13	0.153599	0.490761	0.720433	Stable
ARPC1B	53.5275	35.4712	0.593631	0.262376	0.512827	Stable
ARPC2	7942.13	7048.62	0.172185	0.323307	0.574795	Stable
ARPC3	3603.29	4944.78	-0.456589	0.0101221	0.0725985	Stable
ARPC4	440.017	376.5	0.224908	0.359403	0.609262	Stable
ARPC5	742.366	502.865	0.561958	0.0117077	0.0795487	Stable
ARPC5L	431.492	267.963	0.6873	0.00342636	0.0353506	Stable
ARPIN	65.6386	62.7621	0.0646511	0.895839	0.956999	Stable
ARPP19	4422.04	5177.08	-0.227427	0.192481	0.434183	Stable
ARPP21	207.67	348.628	-0.747394	0.0097989	0.0710617	Stable
ARR3	12.5032	6.76312	0.886531	0.696215	NA	Stable
ARRB1	63.4522	81.8021	-0.366469	0.39226	0.63774	Stable
ARRB2	3.22505	2.20206	0.550466	0.7951	NA	Stable
ARRDC1	26.166	29.6227	-0.179007	0.791882	NA	Stable
ARRDC2	160.605	127.777	0.329895	0.396977	0.641381	Stable
ARRDC3	124.097	122.252	0.0216108	0.952915	0.982966	Stable
ARRDC4	47.8937	60.3066	-0.33248	0.510093	0.734846	Stable
ARRDC5	0.646179	0.994779	-0.622442	0.87599	NA	Stable
ARSA	38.4656	42.4315	-0.141567	0.804014	0.910751	Stable
ARSB	30.8976	60.5383	-0.970355	0.0630909	0.225976	Stable
ARSE	0.701988	2.29252	-1.70742	0.611379	NA	Stable
ARSG	4.9105	5.95683	-0.278674	0.839664	NA	Stable
ARSJ	170.409	217.359	-0.351078	0.269997	0.521251	Stable
ARSK	114.249	131.673	-0.204778	0.618606	0.812786	Stable
ART1	0.1534	0.0803048	0.933744	0.851577	NA	Stable
ART3	1021.83	523.608	0.964599	0.0002633	0.00627608	Stable
ART4	0.681421	0.356736	0.933688	0.851586	NA	Stable
ART5	0	0	NA	NA	NA	Stable
ARTN	0	0	NA	NA	NA	Stable
ARV1	862.959	867.394	-0.00739505	0.971142	0.99158	Stable
ARVCF	23.1497	28.6997	-0.310043	0.64983	NA	Stable
ARX	2.62072	6.08144	-1.21445	0.463857	NA	Stable
AS3MT	111.996	111.462	0.0068868	0.986375	0.997505	Stable
ASAH1	2084.03	2769	-0.409986	0.0591609	0.217599	Stable
ASAH2	136.455	393.264	-1.52707	0.234496	0.482681	Stable
ASAP1	4088.38	6037.52	-0.562426	0.0015261	0.0208106	Stable
ASAP2	293.705	522.199	-0.830232	0.00070941	0.01262	Stable
ASAP3	18.3565	15.8503	0.211787	0.785313	NA	Stable
ASB1	34.2073	23.1358	0.564175	0.430544	NA	Stable
ASB10	0	0	NA	NA	NA	Stable
ASB11	641.51	523.893	0.292199	0.356661	0.606365	Stable
ASB12	0	0	NA	NA	NA	Stable
ASB13	9.15291	13.0789	-0.514944	0.598755	NA	Stable
ASB14	350.769	433.32	-0.304911	0.227292	0.476217	Stable
ASB15	8.77797	10.8929	-0.311424	0.767976	NA	Stable
ASB16	2.50506	0.465552	2.42783	0.461407	NA	Stable
ASB17	0.261662	0.142643	0.87529	0.860882	NA	Stable
ASB18	0.840918	0.596377	0.49574	0.89743	NA	Stable
ASB2	0.484591	0.135396	1.83958	0.707129	NA	Stable
ASB3	558.13	534.154	0.0633455	0.793055	0.906381	Stable
ASB4	1374.93	731.338	0.910745	0.00010441	0.00325165	Stable
ASB5	8.37487	4.19486	0.997443	0.471051	NA	Stable
ASB6	17.1445	16.9049	0.0203008	0.979737	NA	Stable
ASB7	203.348	231.576	-0.187535	0.531115	0.750851	Stable
ASB8	232.787	230.611	0.0135533	0.961396	0.986777	Stable
ASB9	2.69477	0.251046	3.42414	0.278739	NA	Stable
ASCC1	378.074	431.825	-0.191779	0.43141	0.670974	Stable
ASCC2	50.9202	67.4225	-0.404992	0.389233	0.635146	Stable
ASCC3	979.35	1113.29	-0.184932	0.331771	0.582405	Stable
ASCL1	4.98501	5.07992	-0.0272081	0.985491	NA	Stable
ASCL2	0.0989778	0.380834	-1.94399	0.696771	NA	Stable
ASCL3	0.473479	1.68262	-1.82934	0.58426	NA	Stable
ASCL4	0.581583	0.581583	0	1	NA	Stable
ASCL5	0	0	NA	NA	NA	Stable
ASF1A	1975.61	1630.02	0.277406	0.211169	0.456944	Stable
ASF1B	556.004	241.882	1.20079	1.55017e-05	0.000866692	Up
ASGR1	0	0	NA	NA	NA	Stable
ASGR2	23.2251	10.9423	1.08577	0.2107	NA	Stable
ASH1L	622.702	834.636	-0.422603	0.048183	0.192573	Stable
ASH2L	3602.83	2872.19	0.326981	0.14472	0.368662	Stable
ASIC1	11.9347	5.96242	1.00119	0.36119	NA	Stable
ASIC2	0.356427	2.48123	-2.79937	0.329161	NA	Stable
ASIC3	50.431	49.2607	0.0338733	0.94713	0.980232	Stable
ASIC4	0	0	NA	NA	NA	Stable
ASIC5	0.1534	0.0803048	0.933744	0.851577	NA	Stable
ASIP	52.1235	44.4248	0.230571	0.70668	0.861666	Stable
ASL	130.575	80.0623	0.705681	0.060759	0.220966	Stable
ASMTL	28.2625	47.952	-0.762704	0.239388	0.488046	Stable
ASNA1	42.753	23.3144	0.874804	0.133546	NA	Stable
ASNS	1583.45	6537.1	-2.04558	8.47132e-13	7.65091e-10	Down
ASNSD1	426.832	406.054	0.0719958	0.783318	0.901749	Stable
ASPA	128.358	111.556	0.202404	0.857634	0.937656	Stable
ASPDH	6.48711	6.48711	0	1	NA	Stable
ASPG	75.6513	116.186	-0.619004	0.13996	0.361959	Stable
ASPH	115.635	145.349	-0.329944	0.332673	0.583053	Stable
ASPHD1	0	0	NA	NA	NA	Stable
ASPHD2	165.103	103.613	0.672162	0.321884	0.573743	Stable
ASPM	2050.4	2170.43	-0.082076	0.760009	0.887799	Stable
ASPN	21.7581	20.9506	0.0545624	0.937106	NA	Stable
ASPRV1	271.908	425.455	-0.645892	0.00879161	0.0661682	Stable
ASPSCR1	8.85461	12.5688	-0.505351	0.614629	NA	Stable
ASRGL1	502.895	416.083	0.273387	0.248109	0.497788	Stable
ASS1	1367.58	1179.41	0.213558	0.342512	0.592609	Stable
ASTE1	63.2196	55.7361	0.18176	0.685173	0.848588	Stable
ASTL	124.608	25.5304	2.28711	0.0500287	0.196516	Stable
ASTN1	2348.39	2461.36	-0.0677848	0.833895	0.926664	Stable
ASTN2	392.541	333.719	0.23421	0.638849	0.825254	Stable
ASXL1	177.579	167.133	0.0874651	0.76621	0.891318	Stable
ASXL2	472.8	710.069	-0.58673	0.00953625	0.0698018	Stable
ASXL3	160.544	155.331	0.0476264	0.972132	0.991642	Stable
ASZ1	449.959	464.745	-0.0466475	0.849343	0.934771	Stable
ATAD1	1770.78	1794.6	-0.0192787	0.912713	0.965768	Stable
ATAD2	1369.87	1557.43	-0.185122	0.335266	0.585617	Stable
ATAD2B	518.486	820.052	-0.661412	0.00653729	0.054513	Stable
ATAD5	561.099	559.404	0.00436558	0.986375	0.997505	Stable
ATAT1	13.4986	18.8324	-0.480408	0.594517	NA	Stable
ATCAY	1.81155	0.156552	3.53251	0.407222	NA	Stable
ATE1	945.033	1336.61	-0.500142	0.0121177	0.0812563	Stable
ATF1	646.967	839.498	-0.375835	0.139023	0.360503	Stable
ATF2	723.178	847.498	-0.228858	0.372851	0.621384	Stable
ATF3	226.353	495.358	-1.1299	3.24556e-05	0.00143256	Down
ATF4	1233.56	1801.81	-0.546618	0.00812473	0.0630016	Stable
ATF5	5.91671	2.33451	1.34168	0.482265	NA	Stable
ATF6	1867.13	4420.12	-1.24327	8.18568e-10	3.31407e-07	Down
ATF6B	13.2919	19.6889	-0.566837	0.481192	NA	Stable
ATF7	1342.37	1068.39	0.329347	0.163148	0.396587	Stable
ATF7IP	1141.62	1554.02	-0.444929	0.0636219	0.227254	Stable
ATF7IP2	517.959	512.476	0.0153539	0.943819	0.978994	Stable
ATG10	64.0571	31.7044	1.01468	0.0494467	0.195604	Stable
ATG101	171.994	104.513	0.71868	0.0897794	0.280495	Stable
ATG12	841.647	679.178	0.309425	0.150863	0.377431	Stable
ATG13	308.306	195.726	0.655529	0.0129116	0.084454	Stable
ATG14	625.047	1012.5	-0.695879	0.00337855	0.0350111	Stable
ATG16L1	235.46	155.463	0.598914	0.0622747	0.223872	Stable
ATG16L2	5.02983	4.95428	0.0218347	0.986993	NA	Stable
ATG2A	10.6039	10.9109	-0.0411877	0.966858	NA	Stable
ATG2B	1190.76	1645.99	-0.467072	0.0238321	0.123913	Stable
ATG3	793.167	834.517	-0.0733178	0.772675	0.89613	Stable
ATG4A	7992.06	5998.01	0.414083	0.0528061	0.202217	Stable
ATG4B	78.0703	27.7347	1.49308	0.00214586	0.025941	Up
ATG4C	310.943	372.989	-0.262482	0.276882	0.528467	Stable
ATG4D	80.8206	47.3922	0.770073	0.0986006	0.296154	Stable
ATG5	1745.04	1837.3	-0.0743323	0.68891	0.851005	Stable
ATG7	621.533	626.484	-0.0114463	0.964217	0.988377	Stable
ATG9A	35.3688	30.9882	0.190758	0.753194	NA	Stable
ATG9B	34.6621	28.7455	0.270025	0.657071	NA	Stable
ATIC	3691.91	4349.94	-0.236628	0.230996	0.479343	Stable
ATL1	560.12	513.533	0.125278	0.619826	0.81379	Stable
ATL2	13404.3	13118.6	0.0310868	0.867523	0.942673	Stable
ATL3	1036.01	1433.13	-0.468128	0.0277278	0.137075	Stable
ATM	1769.35	2483.92	-0.489397	0.00590454	0.0507877	Stable
ATMIN	458.804	489.058	-0.09213	0.689662	0.851454	Stable
ATN1	4.86503	5.26002	-0.112619	0.940345	NA	Stable
ATOH1	4.32904	0.234826	4.20439	0.0963801	NA	Stable
ATOH7	19.9749	85.9633	-2.10554	0.028581	0.139852	Stable
ATOH8	0.119292	0.119292	0	1	NA	Stable
ATOX1	1815.93	2780.34	-0.614556	0.0207529	0.113277	Stable
ATP10A	4.60431	3.56675	0.368374	0.833867	NA	Stable
ATP10B	79.0244	115.776	-0.550966	0.612986	0.808786	Stable
ATP10D	872.353	1215.89	-0.479022	0.0603143	0.219991	Stable
ATP11A	129.583	167.992	-0.374514	0.314582	0.567011	Stable
ATP11B	828.544	1142.14	-0.463094	0.0829395	0.266573	Stable
ATP11C	1191.16	1644.63	-0.465394	0.037685	0.165035	Stable
ATP12A	28.3148	25.1872	0.16886	0.81437	NA	Stable
ATP13A1	15.8286	19.0944	-0.270619	0.752724	NA	Stable
ATP13A2	162.544	165.325	-0.0244787	0.946234	0.979867	Stable
ATP13A3	1808.77	2578.2	-0.511353	0.00928588	0.0687424	Stable
ATP13A4	26.3639	1.76541	3.90049	0.0250877	NA	Stable
ATP13A5	11.6454	0.720286	4.01505	0.0543918	NA	Stable
ATP1A1	815.02	609.775	0.41856	0.0549927	0.207878	Stable
ATP1A2	15.9032	7.9177	1.00616	0.504334	NA	Stable
ATP1A3	4.66158	4.66158	0	1	NA	Stable
ATP1B1	100.225	38.4219	1.38324	0.00652627	0.054513	Stable
ATP1B2	0.715676	0.375214	0.931592	0.841189	NA	Stable
ATP1B3	8078.06	6350.5	0.34714	0.0670122	0.234373	Stable
ATP1B4	5.32276	8.51128	-0.677202	0.565872	NA	Stable
ATP23	813.236	617.812	0.396508	0.100291	0.29863	Stable
ATP2A1	3.25649	1.95613	0.735313	0.714515	NA	Stable
ATP2A2	1167.46	1566.27	-0.423964	0.029667	0.143283	Stable
ATP2A3	0.566119	0.566119	0	1	NA	Stable
ATP2B1	1550.42	1655.32	-0.0944533	0.628463	0.818268	Stable
ATP2B2	64.3213	63.0655	0.0284456	0.977747	0.993732	Stable
ATP2B3	0.1534	0.0803048	0.933744	0.851577	NA	Stable
ATP2B4	321.256	495.587	-0.625416	0.0173224	0.101034	Stable
ATP2C1	385.06	415.175	-0.108634	0.682236	0.847698	Stable
ATP2C2	19.4129	15.0607	0.366229	0.671708	NA	Stable
ATP4A	4.14022	2.57451	0.68541	0.69522	NA	Stable
ATP4B	1.71516	0.731793	1.22884	0.673753	NA	Stable
ATP5A1	23330.9	21041.6	0.148995	0.38192	0.629182	Stable
ATP5B	22208.9	17324.7	0.358304	0.0548563	0.207429	Stable
ATP5C1	8183.33	9442.62	-0.206499	0.230552	0.479206	Stable
ATP5D	314.3	339.065	-0.109419	0.709601	0.86348	Stable
ATP5E	8088.18	11929.9	-0.560699	0.0187083	0.105892	Stable
ATP5F1	8201.71	10233	-0.31923	0.0750038	0.251605	Stable
ATP5G1	7843.92	9543.02	-0.282872	0.155965	0.38446	Stable
ATP5G2	2860.54	2698.62	0.0840657	0.652392	0.83382	Stable
ATP5G3	9655.51	9996.81	-0.0501146	0.783193	0.901749	Stable
ATP5H	7317.92	12392.2	-0.759931	2.08835e-05	0.00104783	Stable
ATP5I	3701.46	5974.26	-0.690664	0.303806	0.555866	Stable
ATP5J	10721.1	20352.1	-0.924727	7.97398e-06	0.000510609	Stable
ATP5J2	6555.08	9905.29	-0.595586	0.0397153	0.17075	Stable
ATP5L	13965.6	21738.4	-0.638367	0.000683927	0.0122971	Stable
ATP5O	11990.9	19528	-0.703598	0.000110384	0.00335756	Stable
ATP5S	331.1	447.296	-0.433964	0.0916033	0.283962	Stable
ATP5SL	330.506	229.504	0.526158	0.0473366	0.190518	Stable
ATP6AP1	433.502	547.532	-0.336902	0.247877	0.497747	Stable
ATP6AP1L	638.419	662.388	-0.0531748	0.809149	0.912958	Stable
ATP6AP2	7128.44	8279.74	-0.215998	0.216338	0.463256	Stable
ATP6V0A1	571.922	512.648	0.157849	0.532187	0.751569	Stable
ATP6V0A2	359.268	465.548	-0.373868	0.103221	0.303009	Stable
ATP6V0A4	291.817	506.66	-0.795955	0.00511661	0.0463535	Stable
ATP6V0B	2338.62	2371.68	-0.0202499	0.925599	0.97101	Stable
ATP6V0C	1604.14	2057.91	-0.359381	0.147245	0.372026	Stable
ATP6V0D1	1380.31	1123.32	0.29722	0.203678	0.447686	Stable
ATP6V0D2	2105.93	1444.94	0.543442	0.0390203	0.169002	Stable
ATP6V0E1	5222.06	7131.23	-0.449533	0.0191427	0.107332	Stable
ATP6V1A	514.634	497.09	0.050039	0.837884	0.928426	Stable
ATP6V1B1	16.7877	19.5197	-0.217528	0.791515	NA	Stable
ATP6V1B2	4026.84	3498.06	0.20309	0.251743	0.502076	Stable
ATP6V1C1	3643.64	4622.35	-0.343244	0.0814564	0.263344	Stable
ATP6V1C2	1190.58	1535.96	-0.367476	0.118076	0.32832	Stable
ATP6V1D	3514.34	4174.83	-0.248461	0.138869	0.360323	Stable
ATP6V1E1	3308.96	2870.76	0.204948	0.321528	0.573544	Stable
ATP6V1E2	7.68641	15.1354	-0.977546	0.314138	NA	Stable
ATP6V1F	1269.34	1551.24	-0.289341	0.209175	0.454464	Stable
ATP6V1G1	3215.57	4604.03	-0.517822	0.00761858	0.0606922	Stable
ATP6V1G2	3.47809	7.5794	-1.12379	0.545604	NA	Stable
ATP6V1G3	3645.58	6053.95	-0.731727	0.00292689	0.0319969	Stable
ATP6V1H	835.137	953.136	-0.190669	0.408061	0.651234	Stable
ATP7A	202.401	296.313	-0.549902	0.0655351	0.230945	Stable
ATP7B	26.705	19.7007	0.438866	0.533159	NA	Stable
ATP8A1	1122.15	1915.09	-0.771147	0.000198793	0.0051073	Stable
ATP8B1	304.914	264.113	0.207247	0.528698	0.749601	Stable
ATP8B2	11.3828	11.7577	-0.0467566	0.959668	NA	Stable
ATP8B3	26.1658	34.5362	-0.400428	0.517242	NA	Stable
ATP8B4	326.246	253.64	0.36318	0.621602	0.814085	Stable
ATP9A	71.2875	60.8626	0.228092	0.593956	0.795197	Stable
ATP9B	65.2468	80.5437	-0.303864	0.493448	0.723021	Stable
ATPAF1	198.203	326.287	-0.71916	0.00654878	0.0545314	Stable
ATPAF2	152.242	99.3484	0.615796	0.0802487	0.261081	Stable
ATPIF1	5353.72	8807.7	-0.718224	0.000155524	0.00428641	Stable
ATR	496.133	573.237	-0.208405	0.362298	0.612329	Stable
ATRAID	764.624	1105.66	-0.532083	0.018109	0.103768	Stable
ATRIP	149.519	119.111	0.328027	0.375732	0.624215	Stable
ATRN	307.283	435.413	-0.502814	0.0352506	0.158809	Stable
ATRNL1	54.5416	79.2742	-0.539494	0.315159	0.567876	Stable
ATRX	2181.36	2788.37	-0.354189	0.0644724	0.229315	Stable
ATXN1	3394.08	1546	1.13448	0.00610408	0.0520902	Stable
ATXN10	266.671	366.401	-0.458364	0.101738	0.300353	Stable
ATXN1L	413.387	475.182	-0.200985	0.408299	0.651234	Stable
ATXN2	1096.84	2022.83	-0.883019	2.23546e-05	0.00108919	Stable
ATXN2L	70.8721	117.361	-0.727667	0.132015	0.350437	Stable
ATXN3	815.186	919.142	-0.173158	0.482157	0.714142	Stable
ATXN7	948.059	999.121	-0.0756825	0.717339	0.865599	Stable
ATXN7L1	1053.13	858.316	0.295105	0.158185	0.388412	Stable
ATXN7L2	0.695917	4.77007	-2.77702	0.161314	NA	Stable
ATXN7L3	29.7638	40.1362	-0.431346	0.451496	NA	Stable
ATXN7L3B	1457.73	1286.72	0.180027	0.405439	0.648839	Stable
AUH	882.891	1003.86	-0.185245	0.381555	0.628925	Stable
AUNIP	292.714	261.971	0.160082	0.680759	0.846818	Stable
AUP1	78.4842	49.5684	0.662983	0.1622	0.394967	Stable
AURKA	18557.7	10954.9	0.760437	0.000595608	0.0112068	Stable
AURKAIP1	83.3242	48.2086	0.789445	0.0702455	0.241438	Stable
AURKB	453.755	190.755	1.25019	6.24189e-05	0.0023204	Up
AURKC	134.333	61.1627	1.13509	0.00363826	0.0369843	Up
AUTS2	46.3037	78.6514	-0.764344	0.179033	0.419927	Stable
AVEN	1911.53	2243.91	-0.231288	0.367524	0.617149	Stable
AVIL	216.756	265.84	-0.294485	0.338142	0.587732	Stable
AVL9	870.725	1172.13	-0.428844	0.0331896	0.15288	Stable
AVP	0.139588	0.0760947	0.875307	0.86088	NA	Stable
AVPI1	223.038	156.619	0.510027	0.141745	0.364723	Stable
AVPR1A	8.28285	8.28285	0	1	NA	Stable
AVPR1B	0.48702	0.48702	0	1	NA	Stable
AVPR2	0	0	NA	NA	NA	Stable
AWAT1	0	0	NA	NA	NA	Stable
AWAT2	0	0	NA	NA	NA	Stable
AWN	0.332895	0.332895	0	1	NA	Stable
AXDND1	99.3055	133.398	-0.425788	0.235687	0.483693	Stable
AXIN1	37.5383	48.2006	-0.360689	0.537976	0.754555	Stable
AXIN2	40.0858	64.9698	-0.696679	0.171904	0.409422	Stable
AXL	4.15358	9.21278	-1.14928	0.369922	NA	Stable
AZGP1	0.580236	0.102857	2.49601	0.60723	NA	Stable
AZI2	253.196	392.31	-0.631741	0.00746596	0.0599216	Stable
AZIN1	4124.73	5710.8	-0.469392	0.013801	0.0881198	Stable
AZIN2	349.141	241.608	0.531139	0.387183	0.633047	Stable
AZU1	0.477168	0.477168	0	1	NA	Stable
B2M	26.3882	8.32858	1.66375	0.0386721	NA	Stable
B3GALNT1	730.832	633.569	0.20604	0.384766	0.631206	Stable
B3GALNT2	532.058	531.048	0.00274097	0.989986	0.998817	Stable
B3GALT1	42.6426	13.2196	1.68962	0.0481613	NA	Stable
B3GALT2	19.763	43.4189	-1.13552	0.0688168	NA	Stable
B3GALT4	5.15949	6.99721	-0.439551	0.731336	NA	Stable
B3GALT5	1.81725	0.971842	0.902959	0.773158	NA	Stable
B3GALT6	10.1203	13.5368	-0.419644	0.663887	NA	Stable
B3GAT1	0.354059	0.0953288	1.89301	0.698798	NA	Stable
B3GAT2	246.097	390.426	-0.665824	0.00562466	0.0492829	Stable
B3GAT3	9.88589	7.68124	0.364031	0.736955	NA	Stable
B3GLCT	59.0685	54.6159	0.113067	0.812791	0.914513	Stable
B3GNT2	1924.31	2320.08	-0.26983	0.197063	0.439702	Stable
B3GNT3	115.148	95.5724	0.268828	0.488035	0.719335	Stable
B3GNT4	825.941	686.15	0.267515	0.437085	0.676484	Stable
B3GNT5	443.552	298.36	0.57205	0.0804454	0.261492	Stable
B3GNT6	9.31063	12.1069	-0.37888	0.706797	NA	Stable
B3GNT7	0.208413	0.298459	-0.518085	0.917237	NA	Stable
B3GNT8	4.67392	10.4824	-1.16526	0.340652	NA	Stable
B3GNT9	146.135	128.547	0.185004	0.58909	0.792269	Stable
B3GNTL1	22.5129	15.1573	0.570738	0.478904	NA	Stable
B4GALNT1	3.16944	1.7213	0.88073	0.756532	NA	Stable
B4GALNT2	37.5952	27.0986	0.472333	0.481865	NA	Stable
B4GALNT3	35.4329	40.057	-0.176964	0.767793	0.892443	Stable
B4GALNT4	0.481325	0.481325	0	1	NA	Stable
B4GALT1	150.067	176.666	-0.235414	0.499692	0.726459	Stable
B4GALT2	4.7406	2.49822	0.924171	0.584074	NA	Stable
B4GALT3	291.692	281.348	0.0520937	0.849201	0.934771	Stable
B4GALT5	526.65	619.701	-0.234728	0.317811	0.570389	Stable
B4GALT6	80.7129	102.995	-0.351704	0.449025	0.684497	Stable
B4GALT7	61.8382	24.9944	1.30689	0.0176252	0.10194	Stable
B4GAT1	20.4281	11.3323	0.850119	0.310525	NA	Stable
B9D1	34.5708	13.9215	1.31224	0.0616463	NA	Stable
B9D2	27.6088	17.9311	0.622665	0.422143	NA	Stable
BAALC	18.8687	5.02515	1.90876	0.338909	NA	Stable
BABAM1	528.911	381.564	0.4711	0.0444364	0.183251	Stable
BABAM2	232.731	205.282	0.181058	0.552383	0.765955	Stable
BACE1	25.9783	28.4862	-0.132958	0.840132	NA	Stable
BACE2	148.795	212.226	-0.512278	0.0798229	0.260334	Stable
BACH1	591.241	1040.32	-0.815211	0.000235276	0.00577903	Stable
BACH2	34.9978	39.4814	-0.17391	0.7921	0.905555	Stable
BAD	102.242	41.5564	1.29885	0.00317946	0.0337829	Up
BAG1	599.478	514.167	0.221469	0.319173	0.571143	Stable
BAG2	90.2025	105.675	-0.2284	0.560547	0.772735	Stable
BAG3	55.3679	38.3009	0.53167	0.360097	0.610136	Stable
BAG4	612.432	784.112	-0.356512	0.0989211	0.296511	Stable
BAG5	77.6738	54.7508	0.504548	0.242266	0.491353	Stable
BAG6	233.675	197.162	0.245121	0.40421	0.648277	Stable
BAHCC1	0	0	NA	NA	NA	Stable
BAHD1	54.9341	90.6854	-0.723168	0.0862945	0.273612	Stable
BAIAP2	89.1857	105.192	-0.238146	0.611925	0.808333	Stable
BAIAP2L1	294.829	352.979	-0.259703	0.346069	0.596564	Stable
BAIAP2L2	0.849974	1.42542	-0.745891	0.830267	NA	Stable
BAIAP3	24.2401	31.5188	-0.378815	0.548953	NA	Stable
BAK1	30.8612	16.9139	0.867586	0.223039	NA	Stable
BAMBI	29.9152	13.3483	1.16423	0.114769	NA	Stable
BANF1	3402.4	2865.93	0.247551	0.159588	0.390577	Stable
BANF2	2.3892	2.02182	0.240874	0.911523	NA	Stable
BANK1	352.422	347.826	0.0189376	0.967495	0.990009	Stable
BANP	49.7985	49.0311	0.0224039	0.968709	0.99056	Stable
BAP1	141.369	133.747	0.079955	0.814585	0.915597	Stable
BARD1	783.786	755.935	0.0521981	0.821343	0.919945	Stable
BARHL1	0	0	NA	NA	NA	Stable
BARHL2	2.8171	1.53039	0.880309	0.762202	NA	Stable
BARX1	2.84953	0.745888	1.93369	0.50252	NA	Stable
BARX2	9.97394	77.8069	-2.96366	0.109673	0.313685	Stable
BASP1	800.971	1391.6	-0.796917	0.00502962	0.0458905	Stable
BATF	0.214989	0.214989	0	1	NA	Stable
BATF2	1.33707	1.14489	0.223869	0.945024	NA	Stable
BATF3	14.8181	3.6941	2.00407	0.144248	NA	Stable
BAX	0.782511	1.19337	-0.608863	0.858314	NA	Stable
BAZ1A	1508.07	1771.6	-0.232348	0.345158	0.595687	Stable
BAZ1B	1062.82	1288.53	-0.277827	0.176817	0.417004	Stable
BAZ2A	524.148	487.54	0.104455	0.650353	0.832875	Stable
BAZ2B	161.467	212.143	-0.393797	0.252611	0.503379	Stable
BBC3	2.63931	0.956685	1.46405	0.571885	NA	Stable
BBIP1	1218.64	1830.01	-0.58658	0.0285961	0.139852	Stable
BBOF1	30.7891	35.6142	-0.21003	0.740646	NA	Stable
BBOX1	356.196	312.635	0.188192	0.594628	0.795316	Stable
BBS1	12.6907	22.4389	-0.822228	0.308008	NA	Stable
BBS10	19.0724	20.5463	-0.107399	0.888582	NA	Stable
BBS12	282.126	213.739	0.400489	0.206542	0.451248	Stable
BBS2	271.716	380.034	-0.484027	0.160825	0.392486	Stable
BBS4	141.515	90.1253	0.650951	0.0822144	0.264968	Stable
BBS5	342.048	294.833	0.214302	0.488944	0.71935	Stable
BBS9	67.2633	77.3509	-0.201599	0.649863	0.832701	Stable
BBX	993.576	833.345	0.253716	0.178554	0.419364	Stable
BCAM	5.41165	10.4841	-0.954056	0.48143	NA	Stable
BCAN	17.3077	8.70647	0.991255	0.280175	NA	Stable
BCAP29	1328.18	1661.91	-0.323385	0.0800041	0.260707	Stable
BCAP31	628.969	490.064	0.360018	0.135086	0.354662	Stable
BCAR1	7.70588	9.61885	-0.319905	0.781558	NA	Stable
BCAR3	139.179	309.217	-1.15167	0.000263929	0.00627608	Down
BCAS1	77.5602	113.239	-0.545983	0.466039	0.699625	Stable
BCAS2	3534.87	3855.34	-0.125202	0.586351	0.790476	Stable
BCAS3	495.525	401.724	0.302754	0.243077	0.49231	Stable
BCAS4	190.328	104.153	0.869779	0.0732267	0.247345	Stable
BCAT1	3483.8	4264.29	-0.291643	0.130502	0.347679	Stable
BCAT2	15.7218	21.2543	-0.434984	0.576536	NA	Stable
BCCIP	988.674	729.018	0.439541	0.0334028	0.153496	Stable
BCDIN3D	169.473	121.884	0.475556	0.185974	0.42747	Stable
BCHE	27.7051	5.09123	2.44407	0.023751	NA	Stable
BCKDHA	162.104	128.698	0.332928	0.358879	0.608638	Stable
BCKDHB	362.676	436.441	-0.267107	0.379581	0.627874	Stable
BCKDK	257.964	139.487	0.887041	0.00254476	0.0291208	Stable
BCL10	114.386	119.125	-0.0585616	0.877259	0.947379	Stable
BCL11A	12.9421	2.77299	2.22256	0.0744649	NA	Stable
BCL11B	0	0	NA	NA	NA	Stable
BCL2	11.3704	3.94432	1.52744	0.229032	NA	Stable
BCL2A1	3.92363	1.98235	0.98498	0.63614	NA	Stable
BCL2L1	481.324	602.899	-0.324907	0.268649	0.519982	Stable
BCL2L10	910.735	268.02	1.76469	0.000238425	0.00582517	Up
BCL2L11	41.3023	43.6258	-0.0789585	0.882671	0.950195	Stable
BCL2L12	41.6705	35.2591	0.241033	0.661677	0.83879	Stable
BCL2L13	316.767	408.219	-0.36592	0.235302	0.483162	Stable
BCL2L14	1558.88	633.679	1.29868	0.000381111	0.00824056	Up
BCL2L15	31.0201	38.6032	-0.315517	0.591625	NA	Stable
BCL3	2.19391	2.19391	0	1	NA	Stable
BCL6	6.33065	6.04282	0.0671322	0.964267	NA	Stable
BCL6B	6.59015	14.5666	-1.14428	0.30723	NA	Stable
BCL7A	146.182	201.954	-0.46626	0.237395	0.485246	Stable
BCL7B	161.543	153.047	0.0779424	0.802004	0.909503	Stable
BCL7C	24.7161	22.8833	0.11116	0.870343	NA	Stable
BCL9	99.7499	122.008	-0.29059	0.508077	0.732876	Stable
BCL9L	2.78056	3.78848	-0.446241	0.80243	NA	Stable
BCLAF1	2832.35	4173.63	-0.559302	0.00991149	0.0716128	Stable
BCO1	23.1846	8.18205	1.50264	0.0970592	NA	Stable
BCO2	112.926	59.8053	0.917035	0.0942511	0.289081	Stable
BCOR	119.243	130.036	-0.125007	0.751792	0.884182	Stable
BCORL1	63.3264	84.1572	-0.41028	0.389814	0.635437	Stable
BCR	63.7723	71.0876	-0.156666	0.765577	0.891072	Stable
BCS1L	489.204	327.037	0.580981	0.0403474	0.17231	Stable
BDH1	206.002	326.646	-0.665073	0.0186475	0.105666	Stable
BDH2	116.685	75.1379	0.635004	0.144175	0.36791	Stable
BDKRB1	0	0	NA	NA	NA	Stable
BDKRB2	2.12851	0.29725	2.84009	0.412471	NA	Stable
BDNF	86.1304	57.3847	0.585856	0.208869	0.454274	Stable
BDP1	1295.29	1710.57	-0.401202	0.0753321	0.252088	Stable
BEAN1	3.19164	1.28455	1.31303	0.573671	NA	Stable
BECN1	863.262	821.004	0.0724089	0.730348	0.871533	Stable
BECN2	79.629	138.913	-0.802818	0.150974	0.377628	Stable
BEGAIN	0	0	NA	NA	NA	Stable
BEND2	13.7352	4.20994	1.706	0.272024	NA	Stable
BEND3	211.168	216.924	-0.0387966	0.896137	0.956999	Stable
BEND4	54.7144	25.6025	1.09563	0.0535571	0.204293	Stable
BEND5	10.4135	6.14161	0.761763	0.482436	NA	Stable
BEND6	1.14056	4.75458	-2.05957	0.491478	NA	Stable
BEND7	58.094	42.8108	0.440415	0.419769	0.661081	Stable
BEST1	3.36198	5.79547	-0.785612	0.63359	NA	Stable
BEST2	697.802	799.228	-0.195791	0.442003	0.679509	Stable
BEST3	1.65439	2.15265	-0.379815	0.8831	NA	Stable
BEST4	1.43797	0.197274	2.86576	0.493263	NA	Stable
BET1	545.749	805.588	-0.561804	0.0335099	0.153808	Stable
BET1L	151.305	141.828	0.0933171	0.775624	0.89745	Stable
BEX1	173.858	154.294	0.17223	0.660602	0.838212	Stable
BEX3	741.88	642.825	0.206761	0.343743	0.594036	Stable
BEX4	13392.9	19520.4	-0.543519	0.297128	0.549037	Stable
BEX5	10.6297	7.4104	0.52048	0.617604	NA	Stable
BFAR	169.575	194.721	-0.199482	0.502802	0.728446	Stable
BFSP1	1.28104	2.05377	-0.680961	0.799372	NA	Stable
BFSP2	0.480581	2.0387	-2.0848	0.557186	NA	Stable
BGLAP	0.450875	1.03242	-1.19523	0.756303	NA	Stable
BGN	0.450922	0.307678	0.551458	0.910018	NA	Stable
BHLHA15	0.139588	0.0760947	0.875307	0.86088	NA	Stable
BHLHA9	11.6559	11.6559	0	1	NA	Stable
BHLHB9	498.654	267.789	0.89694	0.00827679	0.0637856	Stable
BHLHE22	10.3213	10.3213	0	1	NA	Stable
BHLHE23	0.139588	0.0760947	0.875307	0.86088	NA	Stable
BHLHE40	15.9256	11.3394	0.489996	0.614111	NA	Stable
BHLHE41	10.7661	27.628	-1.35964	0.104788	NA	Stable
BHMG1	1.28808	0.701058	0.877613	0.805603	NA	Stable
BHMT	3.17372	12.8121	-2.01326	0.381024	NA	Stable
BHMT2	1.29416	1.29416	0	1	NA	Stable
BICC1	9949.99	4156.12	1.25946	7.61115e-06	0.000496836	Up
BICD1	4.35544	20.0349	-2.20162	0.140034	NA	Stable
BICD2	309.988	375.12	-0.275137	0.26884	0.520265	Stable
BICDL1	54.5613	56.9996	-0.0630731	0.906396	0.961942	Stable
BICDL2	4.85755	5.05496	-0.0574693	0.971845	NA	Stable
BICRA	7.68755	11.3779	-0.565642	0.618647	NA	Stable
BICRAL	51.5569	107.686	-1.06259	0.0120417	0.0809964	Stable
BID	494.577	434.97	0.185279	0.875159	0.946445	Stable
BIN1	114.287	87.1589	0.39094	0.35776	0.607441	Stable
BIN2	474.936	861.769	-0.859569	0.000529366	0.0103073	Stable
BIN3	463.66	256.087	0.856432	0.00183601	0.0234666	Stable
BIRC3	434.108	732.604	-0.754978	0.000525439	0.0102478	Stable
BIRC5	798.933	602.174	0.407895	0.18228	0.423876	Stable
BIRC6	1400.23	2136.26	-0.609421	0.0048489	0.0450249	Stable
BIRC7	1.55241	3.75767	-1.27532	0.546581	NA	Stable
BIVM	143.346	192.398	-0.424585	0.186648	0.428349	Stable
BLCAP	417.602	492.99	-0.23943	0.321876	0.573743	Stable
BLK	0.0943113	0.0943113	0	1	NA	Stable
BLM	1589.88	1842.94	-0.213087	0.357193	0.606913	Stable
BLMH	782.648	747.516	0.0662579	0.744747	0.881217	Stable
BLNK	33.0578	25.9914	0.346959	0.586862	NA	Stable
BLOC1S1	23.4454	29.7945	-0.345741	0.603108	NA	Stable
BLOC1S2	1406.27	1594.12	-0.180887	0.347138	0.59722	Stable
BLOC1S3	1.14484	1.08513	0.0772872	0.979374	NA	Stable
BLOC1S4	37.1226	17.4232	1.09129	0.104757	NA	Stable
BLOC1S5	54.5782	23.1772	1.23562	0.047095	0.189884	Stable
BLOC1S6	196.118	258.264	-0.397121	0.185686	0.427278	Stable
BLVRA	47.0914	12.0169	1.9704	0.013828	NA	Stable
BLVRB	1593.8	1789.17	-0.16682	0.425359	0.665975	Stable
BLZF1	990.771	1012.01	-0.0306052	0.889937	0.953772	Stable
BMF	23.5233	41.6108	-0.822868	0.173347	NA	Stable
BMI1	379.019	475.051	-0.325813	0.159367	0.390468	Stable
BMP1	1.97085	2.13629	-0.116291	0.962963	NA	Stable
BMP10	0.847667	0.847667	0	1	NA	Stable
BMP15	6209.94	7978.59	-0.361553	0.111584	0.316221	Stable
BMP2	78.6066	61.3018	0.358722	0.526193	0.747867	Stable
BMP2K	716.125	445.291	0.685464	0.0173991	0.101162	Stable
BMP3	4.4159	1.73463	1.34808	0.592738	NA	Stable
BMP4	144.742	114.779	0.334627	0.413839	0.655819	Stable
BMP5	10.5486	5.37109	0.973767	0.52788	NA	Stable
BMP6	3.01839	3.01839	0	1	NA	Stable
BMP7	4.67574	4.91817	-0.0729248	0.959245	NA	Stable
BMP8A	16.4538	24.4772	-0.573015	0.615171	NA	Stable
BMP8B	8.81811	8.81811	0	1	NA	Stable
BMPER	315	284.322	0.147826	0.579812	0.784916	Stable
BMPR1A	488.507	799.411	-0.71056	0.00608654	0.0520481	Stable
BMPR1B	1797.04	2506.7	-0.480169	0.0142429	0.0900032	Stable
BMPR2	487.962	563.987	-0.208894	0.44767	0.683586	Stable
BMS1	1128.46	1001.64	0.171988	0.346718	0.597118	Stable
BMT2	549.863	912.243	-0.730346	0.005763	0.0500469	Stable
BMX	4.01911	4.01911	0	1	NA	Stable
BNC1	309.351	64.4239	2.26358	0.139079	0.36055	Stable
BNC2	1320.18	753.917	0.808262	0.00118927	0.0175159	Stable
BNIP1	234.014	203.356	0.202592	0.497569	0.725619	Stable
BNIP2	446.18	545.998	-0.291269	0.28617	0.538623	Stable
BNIP3	292.424	417.028	-0.512084	0.0573351	0.213717	Stable
BNIP3L	1245.86	1386.67	-0.154482	0.441778	0.679366	Stable
BNIPL	12.68	10.5286	0.268236	0.784057	NA	Stable
BOC	469.594	281.367	0.738961	0.153251	0.380568	Stable
BOD1	2586.56	3489.52	-0.431991	0.0258041	0.130758	Stable
BOD1L1	601.385	804.553	-0.419901	0.0476638	0.190997	Stable
BOK	2.98911	1.84032	0.699763	0.760945	NA	Stable
BOLA1	668.382	650.46	0.0392117	0.86963	0.943566	Stable
BOLA2B	698.683	913.134	-0.386188	0.525392	0.74726	Stable
BOLA3	2340.86	2885.53	-0.301796	0.0901236	0.281346	Stable
BOLL	70.906	7.70786	3.20151	6.84491e-05	0.00248043	Up
BOP1	48.1624	34.1964	0.494064	0.386387	0.632236	Stable
BORA	1054.93	724.775	0.541538	0.0088516	0.0664918	Stable
BORCS6	145.954	135.744	0.104632	0.754292	0.885438	Stable
BORCS7	212.306	227.732	-0.101196	0.714414	0.864433	Stable
BORCS8	85.0167	101.442	-0.254842	0.504236	0.729555	Stable
BPGM	163.219	144.378	0.176953	0.597898	0.797135	Stable
BPHL	17.5309	13.5391	0.372765	0.698938	NA	Stable
BPI	1.75182	0.345906	2.3404	0.502052	NA	Stable
BPIFA1	0	0	NA	NA	NA	Stable
BPIFA2	0	0	NA	NA	NA	Stable
BPIFA3	0.391724	0.634417	-0.695595	0.88879	NA	Stable
BPIFB1	6.72753	7.76224	-0.206396	0.882045	NA	Stable
BPIFB2	1.00486	0.135271	2.89306	0.541103	NA	Stable
BPIFB3	4.91692	4.90873	0.00240283	0.998985	NA	Stable
BPIFB4	2.81746	1.39648	1.01261	0.700294	NA	Stable
BPIFB5	3.87337	4.33847	-0.1636	0.934019	NA	Stable
BPIFB6	12.5503	15.9857	-0.349063	0.699203	NA	Stable
BPIFC	9.13285	6.68063	0.451081	0.825992	NA	Stable
BPNT1	798.207	715.72	0.157367	0.488049	0.719335	Stable
BPTF	755.577	1197.76	-0.664685	0.00442353	0.0424306	Stable
BRAF	510.813	1043.6	-1.0307	8.18554e-07	9.28723e-05	Down
BRAP	1008.72	1243.31	-0.301654	0.197671	0.440305	Stable
BRAT1	9.72271	8.47156	0.19873	0.854357	NA	Stable
BRCA1	3033.19	3354.34	-0.145191	0.467526	0.700782	Stable
BRCA2	7499.73	9743.05	-0.377536	0.0704664	0.241914	Stable
BRCC3	303.583	237.253	0.355663	0.196211	0.43872	Stable
BRD1	93.3376	124.817	-0.419283	0.313947	0.566387	Stable
BRD2	279.656	305.382	-0.126959	0.626285	0.817228	Stable
BRD4	715.908	749.91	-0.0669444	0.759046	0.887368	Stable
BRD7	2523.71	3584.99	-0.506423	0.00503032	0.0458905	Stable
BRD8	504.751	433.533	0.219428	0.348371	0.598579	Stable
BRD9	78.6564	63.4408	0.310153	0.562113	0.773985	Stable
BRDT	5362.77	2372.24	1.17673	1.5816e-10	8.44073e-08	Up
BRF1	1.43267	3.47318	-1.27755	0.53726	NA	Stable
BRF2	48.5026	70.5989	-0.541585	0.213326	0.458982	Stable
BRI3	162.192	367.641	-1.18059	0.000166801	0.00454387	Down
BRI3BP	565.82	437.953	0.369567	0.126452	0.341409	Stable
BRICD5	2.48236	0.660828	1.90937	0.492079	NA	Stable
BRINP1	23.5312	7.83095	1.58732	0.117694	NA	Stable
BRINP2	139.562	11.406	3.61305	0.00118913	0.0175159	Up
BRINP3	233.599	118.863	0.974735	0.126593	0.341686	Stable
BRIP1	652.301	800.685	-0.295696	0.261868	0.512262	Stable
BRIX1	7620.84	7797.69	-0.0330964	0.861972	0.939423	Stable
BRK1	1931.2	1778.14	0.119135	0.583782	0.788332	Stable
BRMS1	17.1702	17.7514	-0.0480243	0.953154	NA	Stable
BRMS1L	299.206	250.469	0.256507	0.341795	0.591924	Stable
BROX	1275.98	1571.28	-0.30034	0.13339	0.352097	Stable
BRPF1	76.1482	81.4772	-0.0975875	0.831868	0.925866	Stable
BRPF3	135.74	284.14	-1.06576	0.000302525	0.00693739	Down
BRS3	2.29483	1.2474	0.879468	0.77429	NA	Stable
BRSK1	2.83002	2.2821	0.31045	0.870756	NA	Stable
BRSK2	0.388194	0.993758	-1.35612	0.764969	NA	Stable
BRWD1	1074	1395.14	-0.377416	0.0722609	0.245578	Stable
BRWD3	364.103	424.842	-0.222581	0.409911	0.652666	Stable
BSCL2	65.6407	58.279	0.171613	0.71283	0.864433	Stable
BSDC1	239.657	389.181	-0.69947	0.00442711	0.0424306	Stable
BSG	251.79	258.864	-0.0399784	0.883166	0.950436	Stable
BSN	3.64067	2.54064	0.519013	0.771453	NA	Stable
BSND	1.94012	0.954763	1.02293	0.74834	NA	Stable
BSP1	0	0	NA	NA	NA	Stable
BSPH1	0.48271	0.48271	0	1	NA	Stable
BSPRY	8.87131	10.1975	-0.200999	0.861282	NA	Stable
BST1	6.87802	9.62721	-0.485125	0.659587	NA	Stable
BST2	0.109775	0.109775	0	1	NA	Stable
BSX	85.759	22.9176	1.90383	0.109672	0.313685	Stable
BTAF1	532.352	655.671	-0.300592	0.19008	0.4311	Stable
BTBD1	135.516	222.841	-0.71755	0.012998	0.0846888	Stable
BTBD10	9532.6	7042.76	0.43673	0.0253496	0.1289	Stable
BTBD11	186.822	19.4248	3.26569	0.000434644	0.00890604	Up
BTBD16	5.27964	4.60225	0.198098	0.901692	NA	Stable
BTBD17	1.20144	0.110681	3.44028	0.47554	NA	Stable
BTBD18	167.973	109.594	0.616065	0.239344	0.488041	Stable
BTBD19	6.25761	11.1665	-0.835498	0.430131	NA	Stable
BTBD2	61.3151	52.7527	0.216999	0.692456	0.853108	Stable
BTBD3	1233	1996.47	-0.695281	0.000346474	0.00763218	Stable
BTBD6	30.2348	53.9625	-0.83575	0.20287	0.446633	Stable
BTBD7	1453.26	1821.47	-0.32581	0.0971137	0.293566	Stable
BTBD9	1354.48	1287.67	0.0729776	0.812866	0.914513	Stable
BTC	3.681	1.96096	0.908539	0.739095	NA	Stable
BTD	44.8367	56.7721	-0.340502	0.486225	0.717813	Stable
BTF3	17893.7	21631.8	-0.273705	0.0960426	0.291651	Stable
BTF3L4	1541.56	2467.17	-0.678465	0.000607049	0.0113674	Stable
BTG1	868.33	1078.91	-0.313264	0.212106	0.457632	Stable
BTG2	226.41	277.429	-0.293178	0.365848	0.61583	Stable
BTG3	1030.85	837.321	0.299979	0.173218	0.411758	Stable
BTG4	34293.8	61281.2	-0.837496	0.164666	0.399203	Stable
BTK	47.9506	58.7325	-0.292612	0.627985	0.818104	Stable
BTLA	1.2682	3.67539	-1.53512	0.564254	NA	Stable
BTN1A1	5.79194	5.42384	0.0947335	0.947673	NA	Stable
BTN2A2	14.0748	7.54418	0.899676	0.397554	NA	Stable
BTNL10	0.29579	0.161248	0.875289	0.860882	NA	Stable
BTNL2	6.4049	1.07364	2.57666	0.228827	NA	Stable
BTNL9	5.62825	4.94213	0.187552	0.903406	NA	Stable
BTRC	1973.78	1817.12	0.119305	0.513408	0.737091	Stable
BUB1	910.566	976.51	-0.100872	0.682288	0.847698	Stable
BUB1B	6691.19	6362.39	0.0726938	0.729885	0.871096	Stable
BUB3	4397.49	3804.76	0.208875	0.250705	0.500868	Stable
BUD13	721.045	542.213	0.411229	0.071434	0.244094	Stable
BUD23	1364.74	868.284	0.652389	0.00102788	0.015817	Stable
BUD31	1843.72	1737.69	0.0854429	0.655805	0.835755	Stable
BVES	85.1837	54.1146	0.65456	0.542407	0.757872	Stable
BYSL	100.468	71.7086	0.486518	0.213587	0.45929	Stable
BZW1	6484.87	6649.2	-0.0361016	0.858035	0.937804	Stable
BZW2	3078.18	2699.45	0.189412	0.317264	0.569863	Stable
C10H10orf113	0.924388	0.45295	1.02915	0.819503	NA	Stable
C10H10orf67	17.4887	46.389	-1.40736	0.0988436	NA	Stable
C10H1orf100	0.433773	0.306805	0.49962	0.918508	NA	Stable
C10H1orf106	0.222946	2.88343	-3.69302	0.254326	NA	Stable
C10H1orf115	237.343	254.852	-0.102685	0.702447	0.859197	Stable
C10H1orf53	13.8764	19.4403	-0.486414	0.564032	NA	Stable
C10H9orf153	1.75271	4.9327	-1.49279	0.455823	NA	Stable
C10H9orf24	5.40134	4.41002	0.292533	0.839056	NA	Stable
C10H9orf3	173.05	153.171	0.176044	0.574313	0.781003	Stable
C10H9orf64	120.638	150.359	-0.31772	0.369699	0.618993	Stable
C10H9orf72	1329.1	1431.26	-0.106839	0.619903	0.81379	Stable
C12H17orf100	249.143	328.838	-0.400405	0.14356	0.367458	Stable
C12H17orf105	1.59573	0.415671	1.94071	0.60081	NA	Stable
C12H17orf47	0	0	NA	NA	NA	Stable
C12H17orf49	330.165	227.744	0.535775	0.07277	0.246436	Stable
C12H17orf50	0.698087	2.28186	-1.70873	0.577152	NA	Stable
C12H17orf53	49.0267	15.3303	1.67718	0.0201095	NA	Stable
C12H17orf58	64.7795	67.6798	-0.0631895	0.894775	0.956354	Stable
C12H17orf62	11.6735	7.01586	0.734542	0.475476	NA	Stable
C12H17orf64	1.83842	0.972887	0.918119	0.780377	NA	Stable
C12H17orf67	1.13541	1.13541	0	1	NA	Stable
C12H17orf74	0	0	NA	NA	NA	Stable
C12H17orf75	182.188	214.966	-0.238675	0.410947	0.653643	Stable
C12H17orf78	0.359145	1.43237	-1.99576	0.60122	NA	Stable
C12H17orf80	2528.8	1930.11	0.389773	0.102705	0.302186	Stable
C12H17orf82	0.204086	0.204086	0	1	NA	Stable
C12H17orf97	0	0	NA	NA	NA	Stable
C12H17orf98	13.2539	1.44688	3.1954	0.0316355	NA	Stable
C13H21orf140	1.25001	1.79799	-0.524451	0.86876	NA	Stable
C13H21orf2	5.5406	6.54095	-0.239457	0.862558	NA	Stable
C13H21orf33	3.15034	3.31139	-0.0719306	0.967281	NA	Stable
C13H21orf59	405.407	397.065	0.0299972	0.891888	0.954572	Stable
C13H21orf62	0.338062	1.34798	-1.99545	0.604396	NA	Stable
C13H21orf91	1838.8	1115.4	0.7212	0.0122379	0.0817325	Stable
C13H3orf14	24.5747	20.463	0.264156	0.719637	NA	Stable
C13H3orf18	1.57082	0.405312	1.95441	0.578789	NA	Stable
C13H3orf20	0.427207	0.427207	0	1	NA	Stable
C13H3orf30	0	0	NA	NA	NA	Stable
C13H3orf33	89.6236	143.349	-0.677577	0.0566105	0.212014	Stable
C13H3orf35	0.263524	2.78832	-3.40339	0.264014	NA	Stable
C13H3orf38	3037.58	2929.03	0.0524976	0.773773	0.896893	Stable
C13H3orf52	76.6713	67.8863	0.175566	0.709824	0.86348	Stable
C13H3orf56	107.744	37.9341	1.50604	0.0387153	0.168354	Stable
C13H3orf58	201.707	249.407	-0.306242	0.458044	0.693295	Stable
C13H3orf62	6.4838	12.1439	-0.905326	0.440354	NA	Stable
C13H3orf67	178.651	158.361	0.173923	0.619161	0.813425	Stable
C13H3orf70	108.424	80.1299	0.436268	0.468046	0.701267	Stable
C13H3orf80	1.35423	36.1797	-4.73964	0.00576443	NA	Stable
C13H3orf84	1.33594	1.42649	-0.0946083	0.969792	NA	Stable
C13H7orf73	29.0088	48.6703	-0.746548	0.236935	0.484905	Stable
C14H10orf10	0	0	NA	NA	NA	Stable
C14H10orf105	0	0	NA	NA	NA	Stable
C14H10orf107	102.433	117.528	-0.198329	0.666065	0.840771	Stable
C14H10orf120	0	0	NA	NA	NA	Stable
C14H10orf128	0	0	NA	NA	NA	Stable
C14H10orf35	297.369	271.683	0.130331	0.764012	0.889916	Stable
C14H10orf53	0	0	NA	NA	NA	Stable
C14H10orf62	0.696498	0.964215	-0.469235	0.908559	NA	Stable
C14H10orf71	0	0	NA	NA	NA	Stable
C14H10orf76	260.718	204.822	0.34812	0.227515	0.476393	Stable
C14H10orf90	1580.52	1017.76	0.635002	0.0748457	0.251291	Stable
C14H10orf99	1.32855	0.955328	0.475783	0.87934	NA	Stable
C14H12orf43	92.7958	67.8409	0.451905	0.267163	0.518216	Stable
C14H12orf49	252.149	251.91	0.00136802	0.995726	1	Stable
C14H12orf65	324.664	260.632	0.316934	0.236113	0.484227	Stable
C14H1orf131	273.019	254.101	0.103598	0.728774	0.87054	Stable
C14H1orf198	59.8029	51.2294	0.223245	0.669896	0.842054	Stable
C14H22orf15	0	0	NA	NA	NA	Stable
C14H22orf31	0.525808	0.146912	1.83958	0.707129	NA	Stable
C14H22orf39	60.8548	61.4575	-0.0142169	0.976727	0.993438	Stable
C14H5orf52	1.04415	0.291593	1.84029	0.689388	NA	Stable
C14H8orf74	0	0	NA	NA	NA	Stable
C15H2orf54	0.690706	0.363744	0.925147	0.848257	NA	Stable
C15H2orf66	0.354059	0.0953288	1.89301	0.698798	NA	Stable
C15H2orf72	1.05824	0.311364	1.76499	0.714265	NA	Stable
C15H2orf76	571.225	675.792	-0.242519	0.259851	0.510447	Stable
C15H2orf80	9.18132	0.747284	3.61897	0.0458752	NA	Stable
C15H2orf82	0	0	NA	NA	NA	Stable
C15H2orf88	497.86	467.594	0.090483	0.906523	0.961942	Stable
C15H4orf47	290.433	383.583	-0.401337	0.121816	0.334558	Stable
C16H5orf22	467.339	423.783	0.141142	0.571011	0.778864	Stable
C16H5orf34	1930.5	1110.15	0.798219	0.000429612	0.0088648	Stable
C16H5orf38	0.592234	0.592234	0	1	NA	Stable
C16H5orf42	1672.72	1587.09	0.0758115	0.786859	0.903941	Stable
C16H5orf47	0.456001	0.364744	0.322152	0.947276	NA	Stable
C16H5orf49	206.752	145.9	0.50292	0.2453	0.494346	Stable
C16H5orf51	1113.05	1830.52	-0.71774	0.00047233	0.0094797	Stable
C16H5orf58	852.768	1043.52	-0.291229	0.271171	0.522452	Stable
C17H20orf141	0	0	NA	NA	NA	Stable
C17H20orf173	0.531108	1.57878	-1.57173	0.649681	NA	Stable
C17H20orf194	165.245	425.214	-1.36359	1.00298e-06	0.000109037	Down
C17H20orf196	27.8137	29.6259	-0.0910597	0.886699	NA	Stable
C17H20orf202	21.6521	14.279	0.600611	0.440549	NA	Stable
C17H20orf24	2056.96	1434.81	0.51965	0.0037855	0.0381835	Stable
C17H20orf27	278.901	184.783	0.59392	0.0439738	0.182308	Stable
C17H20orf85	1.98168	3.02837	-0.611817	0.821853	NA	Stable
C17H20orf96	5.22777	2.69344	0.956749	0.675399	NA	Stable
C17H8orf4	0.267655	2.89855	-3.43688	0.254735	NA	Stable
C17H8orf48	164.762	282.717	-0.778975	0.105312	0.306593	Stable
C18H7orf25	300.382	207.033	0.536936	0.0994575	0.297435	Stable
C18H7orf31	37.1923	18.3532	1.01897	0.327459	NA	Stable
C18H7orf34	1.58094	2.27976	-0.528095	0.827063	NA	Stable
C18H7orf49	29.1375	21.9105	0.411253	0.573949	NA	Stable
C18H7orf57	9.2965	6.82939	0.444929	0.695493	NA	Stable
C18H7orf71	0	0	NA	NA	NA	Stable
C1D	3706.6	3468	0.0959922	0.658234	0.837359	Stable
C1GALT1	1293.83	1519.18	-0.231646	0.679288	0.846299	Stable
C1GALT1C1	473.748	507.608	-0.0995968	0.747804	0.882836	Stable
C1GALT1C1L	2.32521	0.646497	1.84665	0.576209	NA	Stable
C1H14orf105	1.89468	1.47874	0.357584	0.88589	NA	Stable
C1H14orf166	4593.2	5145.51	-0.163814	0.346955	0.597118	Stable
C1H14orf28	274.912	299.432	-0.123254	0.720039	0.866476	Stable
C1H14orf37	437.43	458.212	-0.0669628	0.876148	0.946987	Stable
C1H14orf39	222.993	176.814	0.33477	0.313305	0.56549	Stable
C1H15orf41	1233.91	1043.37	0.241982	0.268246	0.519629	Stable
C1H15orf48	24.1991	20.3266	0.251585	0.745502	NA	Stable
C1H15orf52	1.82386	2.12823	-0.222658	0.928368	NA	Stable
C1H15orf57	201.734	203.643	-0.0135815	0.963828	0.988114	Stable
C1H15orf61	96.1676	101.365	-0.0759377	0.886477	0.952188	Stable
C1H15orf62	119.612	102.106	0.228285	0.509418	0.734144	Stable
C1H15orf65	13.348	6.63061	1.00941	0.409387	NA	Stable
C1H18orf25	622.447	710.339	-0.190558	0.412265	0.654818	Stable
C1H18orf54	98.0335	87.6358	0.161753	0.669715	0.842054	Stable
C1H18orf63	277.493	126.856	1.12926	0.00256541	0.0292716	Up
C1H6orf120	523.396	718.288	-0.456659	0.02872	0.140073	Stable
C1H6orf163	6.88991	10.6089	-0.622723	0.567449	NA	Stable
C1H6orf183	135.47	462.088	-1.77019	1.94464e-05	0.00100582	Down
C1H6orf203	1968.73	2562.12	-0.380073	0.0463108	0.188079	Stable
C1H9orf131	27.9209	7.45559	1.90495	0.324836	NA	Stable
C1H9orf135	54.1797	81.7566	-0.593582	0.244028	0.493139	Stable
C1H9orf152	2.73536	0.888605	1.62211	0.565393	NA	Stable
C1H9orf16	100.821	60.9249	0.726691	0.0874184	0.276088	Stable
C1H9orf40	421.518	614.566	-0.543974	0.0169913	0.0996478	Stable
C1H9orf43	0.447338	5.8359	-3.70552	0.135393	NA	Stable
C1H9orf50	46.9447	31.6568	0.568447	0.309912	0.561697	Stable
C1H9orf57	0.496537	0.496537	0	1	NA	Stable
C1H9orf66	0.337162	0.0942031	1.8396	0.707126	NA	Stable
C1H9orf78	1359.15	1134.55	0.260577	0.254854	0.505276	Stable
C1H9orf84	33.7389	54.6899	-0.696862	0.182101	0.423711	Stable
C1H9orf85	348.006	418.452	-0.265951	0.381255	0.628784	Stable
C1QA	3.18043	2.94271	0.112074	0.953857	NA	Stable
C1QB	0.213603	0.213603	0	1	NA	Stable
C1QBP	4165.02	2818.23	0.563534	0.0137203	0.0879694	Stable
C1QC	0	0	NA	NA	NA	Stable
C1QL1	0	0	NA	NA	NA	Stable
C1QL2	0.233511	0.742909	-1.6697	0.731943	NA	Stable
C1QL3	4.34769	6.30937	-0.537249	0.722083	NA	Stable
C1QL4	6.34836	1.38437	2.19715	0.234157	NA	Stable
C1QTNF1	1.53063	2.30464	-0.590418	0.83641	NA	Stable
C1QTNF12	0.782956	2.54172	-1.6988	0.515147	NA	Stable
C1QTNF2	11.6221	3.5504	1.71081	0.182593	NA	Stable
C1QTNF3	2.16079	1.14083	0.921472	0.794948	NA	Stable
C1QTNF4	7.33403	1.14648	2.67739	0.142991	NA	Stable
C1QTNF5	1.00535	0.109109	3.20386	0.506974	NA	Stable
C1QTNF6	0	0	NA	NA	NA	Stable
C1QTNF7	1.01058	1.01058	0	1	NA	Stable
C1QTNF8	0	0	NA	NA	NA	Stable
C1R	1.36086	0.358665	1.9238	0.628521	NA	Stable
C1RL	0	0	NA	NA	NA	Stable
C1S	3.12592	5.10476	-0.707561	0.67124	NA	Stable
C2	79.1705	39.8392	0.990774	0.283168	0.535202	Stable
C2CD2	115.895	138.528	-0.25736	0.454786	0.69013	Stable
C2CD2L	5.33173	9.35297	-0.810821	0.532315	NA	Stable
C2CD3	176.935	147.961	0.258006	0.541822	0.757508	Stable
C2CD4B	2.70453	2.70453	0	1	NA	Stable
C2CD4C	2.24105	4.28382	-0.93472	0.633558	NA	Stable
C2CD4D	3.08591	1.6758	0.880847	0.755011	NA	Stable
C2CD5	771.944	1146.93	-0.57121	0.0232492	0.121959	Stable
C2CD6	289.263	311.966	-0.109007	0.765619	0.891072	Stable
C2H11orf24	20.1206	26.8735	-0.417508	0.545274	NA	Stable
C2H11orf49	25.2199	24.1691	0.0613962	0.929063	NA	Stable
C2H11orf58	2998.81	3272.47	-0.125987	0.459876	0.694598	Stable
C2H11orf68	15.6919	9.60291	0.708474	0.429454	NA	Stable
C2H11orf74	121.348	73.3707	0.725874	0.0645426	0.229458	Stable
C2H11orf80	63.952	48.7092	0.392795	0.476849	0.709323	Stable
C2H11orf84	27.2856	35.6516	-0.385829	0.636107	NA	Stable
C2H11orf86	2.4045	1.10011	1.12809	0.701465	NA	Stable
C2H11orf91	0.63492	7.80329	-3.61944	0.117498	NA	Stable
C2H11orf94	0.296108	0.479554	-0.695571	0.888793	NA	Stable
C2H11orf95	479.244	545.595	-0.187072	0.441875	0.679421	Stable
C2H11orf96	1.43536	1.70091	-0.244894	0.921184	NA	Stable
C2H11orf98	1133.12	918.912	0.302306	0.266891	0.517859	Stable
C2H19orf24	53.6695	51.3494	0.0637565	0.894926	0.956429	Stable
C2H19orf25	12.4468	11.4483	0.120643	0.893544	NA	Stable
C2H19orf35	0.1534	0.0803048	0.933744	0.851577	NA	Stable
C2H19orf38	5.22858	14.3674	-1.4583	0.224561	NA	Stable
C2H19orf43	60.2849	105.934	-0.813292	0.0655979	0.231009	Stable
C2H19orf44	104.619	128.017	-0.291192	0.439368	0.677537	Stable
C2H19orf53	494.288	293.263	0.753158	0.00523937	0.0469321	Stable
C2H19orf57	36.232	45.6683	-0.333927	0.707934	0.862583	Stable
C2H19orf60	286.773	202.686	0.500662	0.0691989	0.239101	Stable
C2H19orf66	19.8407	6.6837	1.56974	0.100672	NA	Stable
C2H19orf67	8.08626	8.28211	-0.0345273	0.983679	NA	Stable
C2H19orf70	1651.17	1708.16	-0.0489535	0.807183	0.91207	Stable
C2H19orf71	0.109775	0.109775	0	1	NA	Stable
C2H1orf35	325.976	402.915	-0.305711	0.273553	0.525059	Stable
C2H5orf15	507.116	492.941	0.0409004	0.853134	0.936033	Stable
C2H5orf24	267.042	301.8	-0.176524	0.495893	0.724435	Stable
C2H5orf30	44.6097	42.1805	0.0807795	0.884069	0.950972	Stable
C2H5orf46	5.72433	246.651	-5.42922	0.000432574	0.00887911	Down
C2H5orf63	182.8	268.773	-0.556123	0.0681161	0.236613	Stable
C3	5.28295	0.548924	3.26666	0.157043	NA	Stable
C3AR1	20.0052	22.4798	-0.168254	0.818286	NA	Stable
C3H16orf45	38.5094	37.7856	0.027371	0.972058	0.991642	Stable
C3H16orf52	132.091	236.827	-0.842298	0.0157001	0.0954179	Stable
C3H16orf54	1.33657	0.679016	0.977019	0.804414	NA	Stable
C3H16orf58	13.8232	21.7073	-0.65109	0.433102	NA	Stable
C3H16orf59	7.24858	7.61699	-0.0715213	0.950828	NA	Stable
C3H16orf62	172.207	176.648	-0.0367286	0.90447	0.960943	Stable
C3H16orf71	1.21242	3.40225	-1.4886	0.49794	NA	Stable
C3H16orf72	995.887	1439.87	-0.531882	0.00509839	0.0462598	Stable
C3H16orf82	1.08774	0.152234	2.83697	0.557845	NA	Stable
C3H16orf89	1.37357	0.747875	0.877063	0.816411	NA	Stable
C3H16orf90	9.44441	1.28792	2.87442	0.165278	NA	Stable
C3H16orf91	223.23	142.085	0.651772	0.0354305	0.159261	Stable
C3H16orf92	0.1534	0.0803048	0.933744	0.851577	NA	Stable
C3H16orf96	2.41128	1.79893	0.42266	0.866587	NA	Stable
C3H2orf16	0.587753	2.47837	-2.07611	0.533841	NA	Stable
C3H2orf40	7.73558	2.04202	1.92151	0.401836	NA	Stable
C3H2orf42	197.204	182.535	0.111515	0.717076	0.865545	Stable
C3H2orf49	252.719	238.025	0.0864222	0.751101	0.883739	Stable
C3H2orf50	1.09359	0.312062	1.80916	0.675794	NA	Stable
C3H2orf68	116.505	143.71	-0.302777	0.367739	0.617363	Stable
C3H2orf70	0	0	NA	NA	NA	Stable
C3H2orf71	0	0	NA	NA	NA	Stable
C3H2orf73	114.16	48.1592	1.24518	0.166246	0.401376	Stable
C3H2orf74	140.436	75.7042	0.891467	0.0323392	0.150732	Stable
C3H2orf78	0.456001	0.364744	0.322152	0.947276	NA	Stable
C3H2orf81	0	0	NA	NA	NA	Stable
C3H2orf91	5.39377	41.8723	-2.95663	0.117627	NA	Stable
C3H7orf26	21.9313	22.978	-0.0672637	0.924881	NA	Stable
C3H7orf43	1.31417	6.43994	-2.2929	0.160923	NA	Stable
C3H7orf50	19.5153	28.679	-0.555388	0.431317	NA	Stable
C4A	1.90923	0.641304	1.57391	0.609078	NA	Stable
C4BPA	25.0485	9.86721	1.34401	0.105436	NA	Stable
C4BPB	0.222387	1.76992	-2.99254	0.432652	NA	Stable
C4H1orf112	588.767	628.246	-0.0936332	0.670727	0.842147	Stable
C4H1orf146	678.397	613.269	0.145611	0.561105	0.772959	Stable
C4H1orf162	3.02984	0.793082	1.9337	0.502582	NA	Stable
C4H1orf189	10.3163	2.82837	1.86689	0.39052	NA	Stable
C4H1orf194	13.1048	3.92056	1.74096	0.191959	NA	Stable
C4H1orf226	1394.29	1679.91	-0.268854	0.321319	0.573508	Stable
C4H1orf43	466.867	451.972	0.0467792	0.865577	0.941517	Stable
C4H1orf52	291.728	240.593	0.278027	0.33136	0.581973	Stable
C4H1orf54	163.091	97.5917	0.740844	0.0516994	0.199935	Stable
C4H1orf56	40.0799	65.6219	-0.7113	0.162175	0.394967	Stable
C4H1orf68	0	0	NA	NA	NA	Stable
C4H8orf33	113.352	101.502	0.159312	0.650769	0.83299	Stable
C4H8orf34	98.8497	148.09	-0.58316	0.182815	0.424447	Stable
C4H8orf37	240.805	206.245	0.223506	0.520336	0.742497	Stable
C4H8orf46	43.6368	28.2047	0.629608	0.47362	0.706402	Stable
C4H8orf59	1347.05	1746.1	-0.374336	0.173565	0.412048	Stable
C4H8orf76	660.988	707.039	-0.0971651	0.710274	0.86372	Stable
C4H8orf82	4.66882	8.43917	-0.854045	0.509077	NA	Stable
C4H8orf88	109.142	78.6487	0.472719	0.32654	0.578257	Stable
C4H8orf89	8.15314	2.56426	1.66881	0.314124	NA	Stable
C5	12.2661	35.442	-1.53078	0.209077	NA	Stable
C5AR1	73.9989	122.228	-0.724003	0.329505	0.580191	Stable
C5AR2	3.00514	1.14859	1.38757	0.635514	NA	Stable
C5H12orf10	89.0482	78.9798	0.173103	0.666741	0.84111	Stable
C5H12orf29	434.537	444.763	-0.0335582	0.88284	0.950259	Stable
C5H12orf4	2316.27	1914.06	0.275169	0.148549	0.373418	Stable
C5H12orf40	761.925	979.902	-0.362988	0.197062	0.439702	Stable
C5H12orf45	1136.24	1152.24	-0.020177	0.919537	0.969233	Stable
C5H12orf50	14.9854	14.2972	0.0678333	0.942663	NA	Stable
C5H12orf54	4.12986	4.12986	0	1	NA	Stable
C5H12orf56	51.7164	51.9887	-0.00757591	0.987655	0.997877	Stable
C5H12orf57	67.3711	86.2887	-0.357042	0.383041	0.629961	Stable
C5H12orf60	0.786468	0.786468	0	1	NA	Stable
C5H12orf66	198.015	273.882	-0.467945	0.147733	0.372384	Stable
C5H12orf71	8.74425	25.5678	-1.54792	0.41633	NA	Stable
C5H12orf73	401.045	419.435	-0.0646827	0.815252	0.915683	Stable
C5H12orf75	50.8591	47.77	0.0904037	0.880516	0.948874	Stable
C5H22orf23	6.87741	8.47404	-0.301185	0.7989	NA	Stable
C5H22orf46	0.471557	0.471557	0	1	NA	Stable
C6	16.7775	5.07359	1.72545	0.166771	NA	Stable
C6H16orf46	16.1789	25.1557	-0.636775	0.413751	NA	Stable
C6H16orf70	407.883	306.138	0.413973	0.0944548	0.289357	Stable
C6H16orf74	14.2925	3.45215	2.04969	0.0806804	NA	Stable
C6H16orf78	0.188623	0.188623	0	1	NA	Stable
C6H16orf86	0.332895	0.332895	0	1	NA	Stable
C6H16orf95	66.2169	37.3541	0.825931	0.455683	0.690701	Stable
C6H18orf21	334.806	384.867	-0.201031	0.46506	0.698959	Stable
C6H18orf8	1610.22	2509.83	-0.640333	0.00401981	0.0399971	Stable
C6H19orf12	43.2125	51.0447	-0.240312	0.652441	0.83382	Stable
C6H19orf18	3.34069	1.66842	1.00167	0.632153	NA	Stable
C6H19orf33	127.543	185.774	-0.542567	0.121989	0.334894	Stable
C6H19orf47	1.66482	7.33808	-2.14004	0.219846	NA	Stable
C6H19orf54	83.2833	134.775	-0.694452	0.14845	0.373382	Stable
C6H19orf68	0.159643	0.614257	-1.944	0.69677	NA	Stable
C6H19orf81	19.3685	17.9274	0.111547	0.890833	NA	Stable
C6H19orf84	20.2795	18.1688	0.158557	0.86657	NA	Stable
C6H1orf109	103.239	116.773	-0.177723	0.630034	0.819366	Stable
C6H1orf122	25.2087	29.3704	-0.22044	0.734205	NA	Stable
C6H1orf123	308.187	343.326	-0.155776	0.522027	0.744277	Stable
C6H1orf141	117.911	163.684	-0.473219	0.153174	0.380518	Stable
C6H1orf158	0.337162	0.0942031	1.8396	0.707126	NA	Stable
C6H1orf168	736.534	702.377	0.0685058	0.807619	0.91207	Stable
C6H1orf174	42.7307	32.7473	0.383894	0.529268	0.749776	Stable
C6H1orf210	67.596	65.8465	0.0378317	0.930925	0.972592	Stable
C6H1orf216	24.1957	9.65352	1.32562	0.190792	NA	Stable
C6H1orf228	616.512	639.148	-0.0520208	0.836371	0.927824	Stable
C6H1orf50	152.625	141.176	0.1125	0.737447	0.875821	Stable
C6H1orf64	1.34131	28.7366	-4.42117	0.0010223	NA	Stable
C6H1orf87	28.9879	3.96885	2.86866	0.114654	NA	Stable
C6H1orf94	1.42676	0.398039	1.84177	0.657858	NA	Stable
C7	1.92586	1.92586	0	1	NA	Stable
C7H14orf1	794.276	753.748	0.0755577	0.697346	0.855286	Stable
C7H14orf119	1013.63	969.644	0.0640079	0.801983	0.909503	Stable
C7H14orf132	0.452342	1.21203	-1.42194	0.698449	NA	Stable
C7H14orf159	15.9703	1.25102	3.67422	0.0114884	NA	Stable
C7H14orf53	2.85892	2.16182	0.403222	0.844609	NA	Stable
C7H14orf93	11.4513	13.6882	-0.257423	0.779925	NA	Stable
C7H15orf32	0.109775	0.109775	0	1	NA	Stable
C7H15orf39	59.8211	46.7235	0.356507	0.46598	0.699625	Stable
C7H15orf40	279.683	326.82	-0.224706	0.410438	0.653007	Stable
C7H15orf59	0.204086	0.204086	0	1	NA	Stable
C7H6orf10	0.0600683	0.231121	-1.94397	0.696773	NA	Stable
C7H6orf106	569.497	636.402	-0.160248	0.511191	0.735256	Stable
C7H6orf125	829.798	900.539	-0.118029	0.693796	0.853774	Stable
C7H6orf132	53.6963	55.3294	-0.0432237	0.932504	0.973481	Stable
C7H6orf136	123.2	175.606	-0.511337	0.132841	0.351456	Stable
C7H6orf15	0.249442	0.960788	-1.94552	0.664841	NA	Stable
C7H6orf222	4.13046	4.13046	0	1	NA	Stable
C7H6orf223	0.371036	0.0963741	1.94484	0.690745	NA	Stable
C7H6orf226	355.902	296.618	0.262877	0.299988	0.552112	Stable
C7H6orf229	5.84438	16.3789	-1.48672	0.460553	NA	Stable
C7H6orf47	1.69902	4.08666	-1.26622	0.544824	NA	Stable
C7H6orf52	97.7984	285.008	-1.54312	0.391771	0.637268	Stable
C7H6orf62	2846.69	3641.47	-0.355238	0.199246	0.441802	Stable
C7H6orf89	492.162	421.476	0.223682	0.345391	0.595833	Stable
C8A	5.82645	5.82645	0	1	NA	Stable
C8B	30.534	6.43831	2.24567	0.0901784	NA	Stable
C8G	0	0	NA	NA	NA	Stable
C8H4orf17	145.373	112.5	0.369833	0.434914	0.67431	Stable
C8H4orf19	90.4214	112.724	-0.318064	0.369108	0.618751	Stable
C8H4orf22	63.0283	39.6634	0.668192	0.240968	0.489617	Stable
C8H4orf26	3.61128	3.61128	0	1	NA	Stable
C8H4orf32	44.7038	75.4817	-0.755729	0.136332	0.357134	Stable
C8H4orf33	738.688	1130.13	-0.613449	0.00199385	0.0246939	Stable
C8H4orf36	35.9862	31.6304	0.18613	0.793464	NA	Stable
C8H4orf46	38.6845	22.3467	0.791691	0.259324	NA	Stable
C8H4orf48	96.3855	90.2685	0.094594	0.820936	0.919626	Stable
C8H4orf50	0.371036	0.0963741	1.94484	0.690745	NA	Stable
C9	13.7309	9.88106	0.474692	0.607383	NA	Stable
C9H11orf1	89.4214	93.0139	-0.0568265	0.918559	0.968522	Stable
C9H11orf42	0	0	NA	NA	NA	Stable
C9H11orf52	3.97045	2.11565	0.908201	0.737626	NA	Stable
C9H11orf53	0.565856	0.308478	0.875268	0.860886	NA	Stable
C9H11orf54	957.406	847.343	0.176185	0.395719	0.640317	Stable
C9H11orf57	1321.25	1568.72	-0.247686	0.200543	0.443423	Stable
C9H11orf63	5.33735	7.95237	-0.575261	0.649261	NA	Stable
C9H11orf65	1042.11	1216.11	-0.222776	0.354713	0.604542	Stable
C9H11orf70	251.644	205.791	0.290203	0.567361	0.777362	Stable
C9H11orf71	25.867	16.0749	0.686304	0.504256	NA	Stable
C9H11orf87	144.493	89.0278	0.698671	0.101159	0.299652	Stable
C9H11orf88	5.67907	5.40986	0.0700642	0.957319	NA	Stable
C9H11orf97	9.06073	4.00038	1.17949	0.331077	NA	Stable
C9H1orf105	65.6319	82.5955	-0.331666	0.713852	0.864433	Stable
C9H1orf116	58.7886	50.3707	0.222952	0.664714	0.840379	Stable
C9H1orf186	1.87187	0.127211	3.87919	0.301591	NA	Stable
C9H1orf21	714.79	592.875	0.26979	0.405579	0.648848	Stable
C9H1orf27	364.965	388.66	-0.0907533	0.695934	0.855061	Stable
C9H1orf74	86.0246	56.3172	0.611175	0.185097	0.426875	Stable
C9H7orf72	6.93981	1.8697	1.89209	0.411325	NA	Stable
CA10	8.04249	1.07455	2.90391	0.148339	NA	Stable
CA11	1.315	0.691347	0.927583	0.822311	NA	Stable
CA12	15.3352	18.4779	-0.268952	0.771072	NA	Stable
CA14	1.44857	2.08443	-0.525031	0.865395	NA	Stable
CA3	129.448	8.46552	3.93463	0.0227012	0.120223	Stable
CA4	22.1535	10.7789	1.03932	0.255588	NA	Stable
CA5A	29.2317	16.3274	0.840244	0.318419	NA	Stable
CA5B	6.46512	5.03684	0.360159	0.798097	NA	Stable
CA6	1.89804	1.89804	0	1	NA	Stable
CA7	0	0	NA	NA	NA	Stable
CA8	33.0668	9.137	1.85559	0.0249293	NA	Stable
CA9	639.728	519.975	0.299017	0.293344	0.545737	Stable
CAAP1	343.162	288.157	0.252034	0.322356	0.574137	Stable
CAB39	2079.06	2856.05	-0.45809	0.0329698	0.15243	Stable
CAB39L	434.906	352.277	0.303994	0.240875	0.489597	Stable
CABIN1	37.3775	27.5827	0.438407	0.464829	NA	Stable
CABLES1	27.7736	35.8113	-0.366703	0.586803	NA	Stable
CABLES2	84.9154	132.559	-0.642534	0.127433	0.343007	Stable
CABP1	5.44944	3.9975	0.447008	0.841845	NA	Stable
CABP2	0	0	NA	NA	NA	Stable
CABP4	0	0	NA	NA	NA	Stable
CABP5	0	0	NA	NA	NA	Stable
CABP7	372.556	321.352	0.213302	0.360799	0.610835	Stable
CABS1	1.13655	1.13655	0	1	NA	Stable
CABYR	9.25022	9.27806	-0.00433582	0.996921	NA	Stable
CACFD1	1.54798	0.742633	1.05967	0.731807	NA	Stable
CACHD1	52.431	13.8345	1.92215	0.00794365	NA	Stable
CACNA1A	1.79544	7.0146	-1.96603	0.432647	NA	Stable
CACNA1B	1.7443	0.226413	2.94562	0.448737	NA	Stable
CACNA1C	4.44731	2.94593	0.594213	0.759409	NA	Stable
CACNA1D	30.5637	35.6672	-0.222779	0.735683	NA	Stable
CACNA1E	32.138	43.8367	-0.447862	0.465877	0.699625	Stable
CACNA1F	5.68758	0.77019	2.88453	0.178391	NA	Stable
CACNA1G	0.388194	0.993758	-1.35612	0.764969	NA	Stable
CACNA1H	0.565917	1.24639	-1.1391	0.735322	NA	Stable
CACNA1I	1.39879	3.23088	-1.20775	0.574377	NA	Stable
CACNA1S	2.31189	0.171319	3.75431	0.297499	NA	Stable
CACNA2D1	1012.69	911.004	0.152668	0.551289	0.765216	Stable
CACNA2D2	25.2004	33.3739	-0.405274	0.674575	NA	Stable
CACNA2D3	205.391	122.205	0.749067	0.0496799	0.195946	Stable
CACNA2D4	419.392	536.389	-0.35498	0.136776	0.357738	Stable
CACNB1	4.63621	2.75162	0.752662	0.696368	NA	Stable
[truncated: 18,568 more rows]
