# Supplementary material for: Coordination of zygotic genome activation entry and exit by H3K4me3 and H3K27me3 in porcine early embryos
Source: HighWire-hosted journal article supplement (doi:10.1101/gr.276207.121), 2022-07-22
Supplement: Supplemental_Table_S6.xlsx [file Supplemental_Table_S6.xlsx]

## Sheet: qPCR primer
Supplemental Table S6. List of primers used for quantitative PCR and oligo sequences for siRNA
Gene	Forward Sequence	Reverse Sequence
TDG	CAGACGTTCAAGAGGTGCAATATAC	ATGTCACTAAAAGTAGAGTCCCCAC
LEUTX	CGCCGATCCCGTACTTACTT	AGTTTCACGCTCCTTCTTCCTC
PNRC1	CCACCCTCTTTCTCCCTCACT	CTTCTTTCGCCGCTTCTTTGG
SUPT4H1	GCTTGTTTGCTGTGTTCGCT	TGTAGGCCACTCCTCGACTT
KLF17	AAGATTATGAGGCAGGGTGGAA	CGGAAAACTGTCAAAGACCAAGA
TFAP2C	GATCAGACGGTCATTCGCAAAG	AGAAAACCTCGCTGGGATTCAT
KDM5B	GACGTGTGCCAGTTTTGGAC	TCGAGGACACAGCACCTCTA
KDM5C	GCGGAAGCGCAGTCTTGAA	GCCTCACTCAGGCAGTTCTT
GAPDH	TCGGAGTGAACGGATTTG	CCTGGAAGATGGTGATGG

## Sheet: siRNA oligo
Supplemental Table S6. List of primers used for quantitative PCR and oligo sequences for siRNA
Targets	oligo sequence
KDM5B	GCAGUUGUUUGCAAGGAUATT
	GCUCAUAUCACUGCUGAUATT
	GGGAGUAAUUGAUUCAGAATT
KDM5C	GAAGAUUGUUGGUGUGUAATT
	GGGUUCAUGUUGUAAUAAATT
	CCAAGACCUUCCUCAAGAATT
